# Supplementary material for: DNA Binding of the Cell Cycle Transcriptional Regulator GcrA Depends on N6-Adenosine Methylation in Caulobacter crescentus and Other Alphaproteobacteria
Source: PubMed Central journal article supplement (PMC3667746; doi:10.1371/journal.pgen.1003541), 2013-05-30
Supplement: pgen.1003541.s001.pdf [file pgen.1003541.s001.pdf]

Figure S1

CLUSTAL multiple sequence alignment

```

Sinorhizobium      MNWTDERVEKLLKLLWSEGLSASQIAAQGGVSRNAVIGKVHRLSLPGRKAGG-STAAAA
59
Agrobacterium      MNWTDERVEKLLKLLWSEGLSASQIAAQGGVSRNAVIGKVHRLNLPGRVKAGGPVTSARS
60
Brucella           MNWTDERVEKLLKLLWSEGLSASQIAAQGGVSRNAVIGKVHRLKLSGRGKTTTAAPRSKK
60
Caulobacter        MSWTDERVSTLKKLLWLDGLSASQIAKQGGVTRNAVIGKVHRLGLSGRAAPSQPARPAFK
60
* .*****. ***** :***** *****:***** ***** *.** .      :

Sinorhizobium      RPKR-ATSAPRAPN--YAARS---VTRTVTRTAGATALKEELAVDLTIDQELQIDRNIVL
113
Agrobacterium      APKRTAAPAPRATT--FAGRVNAAPARILTRSNAATALHEEIDIETAQVLDYVPSKNVVT
118
Brucella           VNTPAAAPRPAVQNNNSGTHTTTMRATVTKTVGATALQMEYATEVVAETVIKPAADVVV
120
Caulobacter        APRPARPAAQAMPS-----APRRVTPVEAPTS-----VPVAAAPAPLPAFRHEE
104
. .      .      .      :*      .*:      .

Sinorhizobium      PMSRRLTELTELTERCKWPIGDPLKEEFHFCGNDSPYCTFHARLAYQPSAERRMR
173
Agrobacterium      PISRRLTLTELTERCKWPGDPLKDDFHFCGCEALESSPYCKFHAKLAYQPVSEERRKA-
177
Brucella           PISRHLTLLQLSERTCKWPIGDPLNEDFHFCGNESEASPYCSYHSRLAFQPTAERRRAR
180
Caulobacter        PGS--ATVLTLAGAHMCKWPIGDPSSEGFTFCGRRSSEG-PYCVEHARVAYQPQQTKKKSG
161
* *      : *      : ****:*** .: * ***      : *. ***      *::*:**      :::

Sinorhizobium      -----
Agrobacterium      -----
Brucella           -----
Caulobacter        GAELARSLRRYI 173

```

"\*" means that the residues or nucleotides in that column are identical in all sequences in the alignment.

":" means that conserved substitutions have been observed.

"." means that semi-conserved substitutions are observed.
