# Supplementary material for: DNA Binding of the Cell Cycle Transcriptional Regulator GcrA Depends on N6-Adenosine Methylation in Caulobacter crescentus and Other Alphaproteobacteria
Source: PubMed Central journal article supplement (PMC3667746; doi:10.1371/journal.pgen.1003541), 2013-05-30
Supplement: pgen.1003541.s003.pdf [file pgen.1003541.s003.pdf]

### FIGURE S3

10 20 30 40 50 60 70  
| | | | | | |  
MSWTDERVSTLKKLWLDGLSASQIAKQLGGVTRNAVIGKVHRLGLSGRAAPSQPARPAFKAPRPARPAAQ  
hccchhhhhhhhhhhhttcchhhhhhhhhcchhhhhhhhhhetcccccccccccccccccccccccccccc  
  
AMPSAPRRVTPVEAPTSVPVAAAPAPLPAFRHEEPGSATVLTGALHMCKWPIGDPSSEGFTFCGRRSSEG  
cccccccccccccccccccccccccccccccccttceeeehccccccccccccccccceetcccccc  
  
PYCVEHARVAYQPQQTKKKSGGAELARSLRRYI  
cccchhhheeeccccccccchhhhhhhhhhh

Legend:

Alpha helix (h): 28.90%  
Extended strand (e): 6.94%  
Beta turn (t): 3.47%  
Random coil (c): 60.69%
