# Supplementary material for: DNA Binding of the Cell Cycle Transcriptional Regulator GcrA Depends on N6-Adenosine Methylation in Caulobacter crescentus and Other Alphaproteobacteria
Source: PubMed Central journal article supplement (PMC3667746; doi:10.1371/journal.pgen.1003541), 2013-05-30
Supplement: pgen.1003541.s008.pdf [file pgen.1003541.s008.pdf]

**Figure S8**

**Primers for GcrAs cloning:**

**S. meliloti Rm1021 (SMc02139)**

pSMc02139-CACC- fw  
CACCATGAACTGGACTGACGAGCG  
pSMc02139-rev  
AGCGGAATGAGCAAGGCG

**B. melitensis biovar abortus (BAB1\_0329)**

pBAB1\_0329- CACC- fw  
CACCATGAACTGGACTGACGAGCG  
pBAB1\_0329- rev  
GGGGACGCTTCCTGAATTCA

**C. crescentus CB15N (CC2245)**

pCC2245-NdeI-fw  
CACCATGAGCTGGACCGACGAA  
pCC2245-rev2  
GTCATCCCGCGCTTTATGC

**Oligonucleotide pairs for lacZ reporter constructions 5'- 3':**

*P<sub>CC\_2165</sub> (mipZ):*

AAA AAA GAA TTC GTG CAG GGC GCC CAT GGT CGG AA  
AAA AAA TCT AGA CGA CGT CGT TGT CGC TGA GGT TCA A

*P<sub>CC\_2045</sub> (podJ):*

AAA AAA GAA TTC ATC GGA CGC GCG CCC AGC CAG CCG AA  
AAA AAA TCT AGA ATC CAG CGC CAG CGC GAC GCG ACC AA

*P<sub>CCNA\_00697</sub>:*

AAA AAA GAA TTC AAG GGG TCG TGG ACC GAC AAG AA  
AAA AAA TCT AGA ATC CCT CTC TCC ATG AGA GAG GGA TT

*P<sub>CC\_2482</sub> (pleC):*

AAA AAA GAA TTC CTG GCG GAC GAG ATC CTC AA  
AAA AAA TCT AGA GGG CTG GGC CAT GGC CCA A

*P<sub>CC\_1465</sub> (flaY):*

AAA AAA GAA TTC CTG GAT CGC GCC TTC CTT GA  
AAA AAA TCT AGA TTG AGC GCC TGA TAG GTG GCG AAC A

**EMSA probes (70 bp) 5'- 3':**

*CCNA\_0697:*  
ACGTTTCCCCGAACAGGGGCGAAACGAATCGGGACCGAATCAGCGACGTTTCGCCGATTCAGTATTTGTTTC

*ctrA promoter:*

AGACTGGTTAATGGTGAATGTTTCCCGTCGGAGGAATGGTTAATCTGATTTGCGAATCGGGTGCAAGCCG

*mipZ promoter:*

TGGCTCGGATCCTTCTGCGTCGCGACTCAGCGACTCTTAATCGAAGGTTAACACGATGTTTCCCGCCCC

*CCNA\_0278 and CCNA\_0279:*

CGCGCGCTGGCGTCGGCCGCGCAGGCTGCGGCTCATGACCACGCCAAGCCGTCGCATCCTGATCTTGGT

*CCNA\_1926 and CCNA\_1927:*

TTCTGAAGATTTCTGCTAGCCTTCCCAAGGGGCAAAGGCGCCTAGACTCGCCCCAACGAACACAGGGAGG

**DNase I foot printing region (ctrAP1 promoter), 120 bp, 5'- 3':**

cggtgaaacccttcggccactttgccggagagttaatttaagactggtaaatggatgatttcccgctcgagggaatggtaatctgatttgcg  
Aatcgggtgcaagccgcgctcgagcc
