# Supplementary material for: DNA Binding of the Cell Cycle Transcriptional Regulator GcrA Depends on N6-Adenosine Methylation in Caulobacter crescentus and Other Alphaproteobacteria
Source: PubMed Central journal article supplement (PMC3667746; doi:10.1371/journal.pgen.1003541), 2013-05-30
Supplement: pgen.1003541.s009.pdf [file pgen.1003541.s009.pdf]

FIGURE S9

A

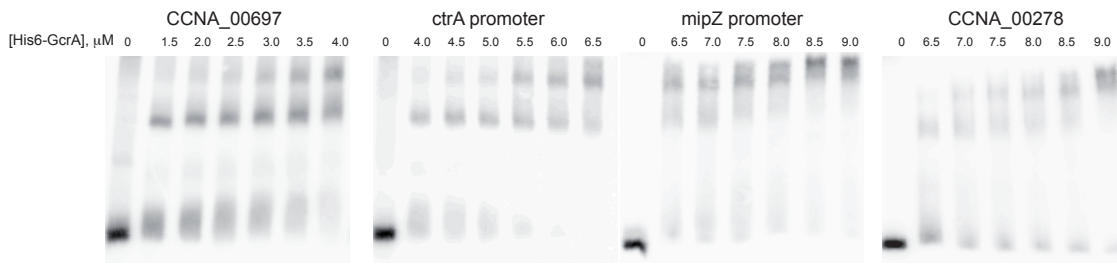

B

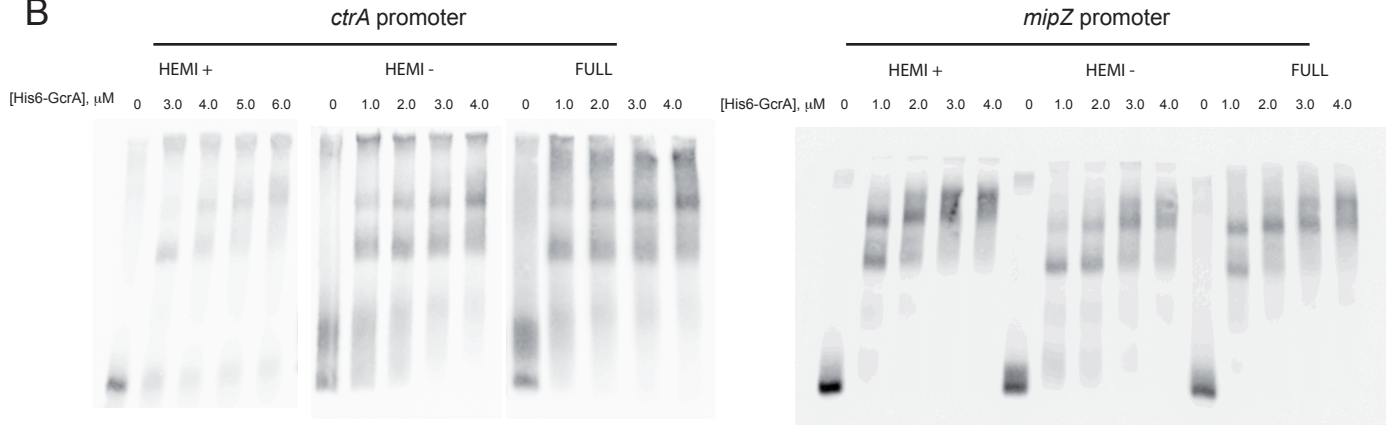

C

|                                      | Kd ( $\mu\text{M}$ ) (Error +/- 0.5) |
|--------------------------------------|--------------------------------------|
| CCNA_00697                           | 4                                    |
| promoter of <i>ctrA</i>              | 6.5                                  |
| promoter of <i>mipZ</i>              | 8.5                                  |
| CCNA_00287                           | > 9                                  |
| promoter of <i>ctrA</i> - HEMI PLUS  | 4                                    |
| promoter of <i>ctrA</i> - HEMI MINUS | 4                                    |
| promoter of <i>ctrA</i> - FULLY      | 2                                    |
| promoter of <i>mipZ</i> - HEMI PLUS  | 2                                    |
| promoter of <i>mipZ</i> - HEMI MINUS | 3                                    |
| promoter of <i>mipZ</i> - FULLY      | 1                                    |
