# Supplementary material for: DNA Binding of the Cell Cycle Transcriptional Regulator GcrA Depends on N6-Adenosine Methylation in Caulobacter crescentus and Other Alphaproteobacteria
Source: PubMed Central journal article supplement (PMC3667746; doi:10.1371/journal.pgen.1003541), 2013-05-30
Supplement: pgen.1003541.s013.pdf [file pgen.1003541.s013.pdf]

TABLE S1

| Q     | log I  | I        |
|-------|--------|----------|
| 0.008 | -1.268 | 0.053970 |
| 0.009 | -1.268 | 0.053943 |
| 0.009 | -1.274 | 0.053256 |
| 0.010 | -1.275 | 0.053110 |
| 0.010 | -1.279 | 0.052603 |
| 0.011 | -1.281 | 0.052340 |
| 0.011 | -1.283 | 0.052143 |
| 0.012 | -1.289 | 0.051447 |
| 0.012 | -1.291 | 0.051115 |
| 0.013 | -1.296 | 0.050559 |
| 0.013 | -1.298 | 0.050373 |
| 0.014 | -1.300 | 0.050151 |
| 0.014 | -1.305 | 0.049600 |
| 0.015 | -1.309 | 0.049096 |
| 0.015 | -1.313 | 0.048646 |
| 0.016 | -1.318 | 0.048070 |
| 0.016 | -1.323 | 0.047582 |
| 0.017 | -1.328 | 0.047031 |
| 0.017 | -1.331 | 0.046718 |
| 0.018 | -1.335 | 0.046284 |
| 0.018 | -1.342 | 0.045512 |
| 0.019 | -1.346 | 0.045085 |
| 0.019 | -1.351 | 0.044562 |
| 0.020 | -1.357 | 0.043923 |
| 0.020 | -1.363 | 0.043344 |
| 0.021 | -1.368 | 0.042870 |
| 0.021 | -1.373 | 0.042392 |
| 0.022 | -1.379 | 0.041764 |
| 0.022 | -1.384 | 0.041279 |
| 0.023 | -1.391 | 0.040678 |
| 0.023 | -1.395 | 0.040296 |
| 0.024 | -1.401 | 0.039690 |
| 0.024 | -1.406 | 0.039290 |
| 0.025 | -1.411 | 0.038798 |
| 0.025 | -1.418 | 0.038155 |
| 0.026 | -1.425 | 0.037588 |
| 0.026 | -1.432 | 0.036977 |
| 0.027 | -1.439 | 0.036427 |
| 0.027 | -1.447 | 0.035700 |
| 0.028 | -1.453 | 0.035238 |
| 0.028 | -1.459 | 0.034760 |
| 0.029 | -1.466 | 0.034221 |
| 0.029 | -1.472 | 0.033741 |
| 0.030 | -1.477 | 0.033319 |
| 0.030 | -1.483 | 0.032879 |
| 0.031 | -1.490 | 0.032339 |
| 0.031 | -1.496 | 0.031944 |
| 0.032 | -1.503 | 0.031439 |
| 0.032 | -1.510 | 0.030902 |
| 0.033 | -1.516 | 0.030446 |

|       |        |          |
|-------|--------|----------|
| 0.033 | -1.523 | 0.030014 |
| 0.034 | -1.529 | 0.029608 |
| 0.034 | -1.532 | 0.029345 |
| 0.035 | -1.541 | 0.028780 |
| 0.035 | -1.547 | 0.028411 |
| 0.036 | -1.554 | 0.027953 |
| 0.036 | -1.560 | 0.027570 |
| 0.037 | -1.567 | 0.027115 |
| 0.037 | -1.572 | 0.026811 |
| 0.038 | -1.579 | 0.026376 |
| 0.038 | -1.585 | 0.025994 |
| 0.039 | -1.591 | 0.025637 |
| 0.039 | -1.598 | 0.025221 |
| 0.040 | -1.604 | 0.024905 |
| 0.040 | -1.613 | 0.024404 |
| 0.041 | -1.618 | 0.024098 |
| 0.041 | -1.625 | 0.023695 |
| 0.042 | -1.630 | 0.023429 |
| 0.042 | -1.635 | 0.023159 |
| 0.043 | -1.640 | 0.022921 |
| 0.043 | -1.645 | 0.022642 |
| 0.044 | -1.651 | 0.022324 |
| 0.044 | -1.659 | 0.021934 |
| 0.045 | -1.666 | 0.021556 |
| 0.045 | -1.671 | 0.021329 |
| 0.046 | -1.676 | 0.021108 |
| 0.046 | -1.683 | 0.020761 |
| 0.047 | -1.691 | 0.020389 |
| 0.047 | -1.696 | 0.020147 |
| 0.048 | -1.700 | 0.019971 |
| 0.048 | -1.705 | 0.019734 |
| 0.049 | -1.711 | 0.019438 |
| 0.049 | -1.719 | 0.019087 |
| 0.050 | -1.725 | 0.018818 |
| 0.050 | -1.731 | 0.018569 |
| 0.051 | -1.737 | 0.018309 |
| 0.051 | -1.743 | 0.018090 |
| 0.052 | -1.746 | 0.017927 |
| 0.052 | -1.755 | 0.017597 |
| 0.053 | -1.761 | 0.017328 |
| 0.053 | -1.767 | 0.017117 |
| 0.054 | -1.772 | 0.016889 |
| 0.054 | -1.776 | 0.016751 |
| 0.055 | -1.778 | 0.016656 |
| 0.055 | -1.785 | 0.016406 |
| 0.056 | -1.790 | 0.016205 |
| 0.056 | -1.797 | 0.015962 |
| 0.057 | -1.801 | 0.015800 |
| 0.057 | -1.807 | 0.015612 |
| 0.058 | -1.812 | 0.015405 |
| 0.058 | -1.818 | 0.015218 |
| 0.059 | -1.825 | 0.014977 |

|       |        |          |
|-------|--------|----------|
| 0.059 | -1.831 | 0.014766 |
| 0.060 | -1.838 | 0.014522 |
| 0.060 | -1.840 | 0.014466 |
| 0.061 | -1.844 | 0.014336 |
| 0.061 | -1.847 | 0.014207 |
| 0.062 | -1.854 | 0.013989 |
| 0.062 | -1.861 | 0.013766 |
| 0.063 | -1.865 | 0.013651 |
| 0.064 | -1.868 | 0.013554 |
| 0.064 | -1.872 | 0.013442 |
| 0.065 | -1.876 | 0.013308 |
| 0.065 | -1.881 | 0.013150 |
| 0.066 | -1.883 | 0.013081 |
| 0.066 | -1.886 | 0.012990 |
| 0.067 | -1.892 | 0.012817 |
| 0.067 | -1.900 | 0.012581 |
| 0.068 | -1.902 | 0.012534 |
| 0.068 | -1.906 | 0.012427 |
| 0.069 | -1.916 | 0.012139 |
| 0.069 | -1.923 | 0.011954 |
| 0.070 | -1.925 | 0.011878 |
| 0.070 | -1.929 | 0.011769 |
| 0.071 | -1.935 | 0.011622 |
| 0.071 | -1.941 | 0.011464 |
| 0.072 | -1.943 | 0.011400 |
| 0.072 | -1.946 | 0.011312 |
| 0.073 | -1.951 | 0.011200 |
| 0.073 | -1.956 | 0.011070 |
| 0.074 | -1.960 | 0.010957 |
| 0.074 | -1.965 | 0.010851 |
| 0.075 | -1.968 | 0.010763 |
| 0.075 | -1.970 | 0.010713 |
| 0.076 | -1.976 | 0.010557 |
| 0.076 | -1.982 | 0.010423 |
| 0.077 | -1.989 | 0.010249 |
| 0.077 | -1.993 | 0.010171 |
| 0.078 | -1.999 | 0.010030 |
| 0.078 | -2.003 | 0.009930 |
| 0.079 | -2.007 | 0.009835 |
| 0.079 | -2.013 | 0.009696 |
| 0.080 | -2.017 | 0.009614 |
| 0.080 | -2.019 | 0.009578 |
| 0.081 | -2.026 | 0.009428 |
| 0.081 | -2.031 | 0.009316 |
| 0.082 | -2.031 | 0.009321 |
| 0.082 | -2.036 | 0.009213 |
| 0.083 | -2.036 | 0.009210 |
| 0.083 | -2.041 | 0.009093 |
| 0.084 | -2.048 | 0.008948 |
| 0.084 | -2.057 | 0.008763 |
| 0.085 | -2.062 | 0.008672 |
| 0.085 | -2.064 | 0.008636 |

|       |        |          |
|-------|--------|----------|
| 0.086 | -2.064 | 0.008625 |
| 0.086 | -2.069 | 0.008533 |
| 0.087 | -2.072 | 0.008474 |
| 0.087 | -2.076 | 0.008400 |
| 0.088 | -2.078 | 0.008354 |
| 0.088 | -2.083 | 0.008255 |
| 0.089 | -2.094 | 0.008047 |
| 0.089 | -2.096 | 0.008017 |
| 0.090 | -2.101 | 0.007930 |
| 0.090 | -2.106 | 0.007833 |
| 0.091 | -2.108 | 0.007800 |
| 0.091 | -2.113 | 0.007716 |
| 0.092 | -2.120 | 0.007591 |
| 0.092 | -2.125 | 0.007501 |
| 0.093 | -2.129 | 0.007430 |
| 0.093 | -2.133 | 0.007357 |
| 0.094 | -2.137 | 0.007301 |
| 0.094 | -2.135 | 0.007323 |
| 0.095 | -2.136 | 0.007315 |
| 0.095 | -2.139 | 0.007264 |
| 0.096 | -2.144 | 0.007179 |
| 0.096 | -2.151 | 0.007060 |
| 0.097 | -2.155 | 0.006996 |
| 0.097 | -2.155 | 0.006997 |
| 0.098 | -2.164 | 0.006848 |
| 0.098 | -2.170 | 0.006761 |
| 0.099 | -2.174 | 0.006691 |
| 0.099 | -2.173 | 0.006709 |
| 0.100 | -2.176 | 0.006665 |
| 0.100 | -2.185 | 0.006536 |
| 0.101 | -2.189 | 0.006471 |
| 0.101 | -2.187 | 0.006509 |
| 0.102 | -2.192 | 0.006432 |
| 0.102 | -2.197 | 0.006354 |
| 0.103 | -2.201 | 0.006291 |
| 0.103 | -2.208 | 0.006195 |
| 0.104 | -2.207 | 0.006209 |
| 0.104 | -2.206 | 0.006218 |
| 0.105 | -2.211 | 0.006154 |
| 0.105 | -2.219 | 0.006039 |
| 0.106 | -2.223 | 0.005982 |
| 0.106 | -2.226 | 0.005947 |
| 0.107 | -2.231 | 0.005878 |
| 0.107 | -2.234 | 0.005834 |
| 0.108 | -2.236 | 0.005803 |
| 0.108 | -2.241 | 0.005737 |
| 0.109 | -2.245 | 0.005691 |
| 0.109 | -2.249 | 0.005642 |
| 0.110 | -2.252 | 0.005600 |
| 0.110 | -2.256 | 0.005551 |
| 0.111 | -2.262 | 0.005470 |
| 0.111 | -2.262 | 0.005474 |

|       |        |          |
|-------|--------|----------|
| 0.112 | -2.264 | 0.005450 |
| 0.112 | -2.269 | 0.005381 |
| 0.113 | -2.275 | 0.005314 |
| 0.113 | -2.284 | 0.005204 |
| 0.114 | -2.286 | 0.005172 |
| 0.114 | -2.293 | 0.005099 |
| 0.115 | -2.291 | 0.005119 |
| 0.115 | -2.288 | 0.005152 |
| 0.116 | -2.290 | 0.005125 |
| 0.116 | -2.295 | 0.005065 |
| 0.117 | -2.300 | 0.005016 |
| 0.117 | -2.303 | 0.004978 |
| 0.118 | -2.306 | 0.004945 |
| 0.118 | -2.310 | 0.004892 |
| 0.119 | -2.314 | 0.004850 |
| 0.119 | -2.316 | 0.004833 |
| 0.120 | -2.314 | 0.004853 |
| 0.120 | -2.320 | 0.004789 |
| 0.121 | -2.326 | 0.004719 |
| 0.121 | -2.332 | 0.004658 |
| 0.122 | -2.333 | 0.004648 |
| 0.122 | -2.335 | 0.004621 |
| 0.123 | -2.340 | 0.004573 |
| 0.123 | -2.342 | 0.004545 |
| 0.124 | -2.351 | 0.004458 |
| 0.124 | -2.353 | 0.004438 |
| 0.125 | -2.351 | 0.004457 |
| 0.125 | -2.354 | 0.004426 |
| 0.126 | -2.359 | 0.004372 |
| 0.126 | -2.362 | 0.004348 |
| 0.127 | -2.358 | 0.004381 |
| 0.127 | -2.364 | 0.004320 |
| 0.128 | -2.370 | 0.004264 |
| 0.128 | -2.369 | 0.004273 |
| 0.129 | -2.370 | 0.004264 |
| 0.130 | -2.377 | 0.004196 |
| 0.130 | -2.383 | 0.004135 |
| 0.131 | -2.388 | 0.004096 |
| 0.131 | -2.391 | 0.004065 |
| 0.132 | -2.396 | 0.004022 |
| 0.132 | -2.397 | 0.004009 |
| 0.133 | -2.396 | 0.004014 |
| 0.133 | -2.406 | 0.003926 |
| 0.134 | -2.407 | 0.003913 |
| 0.134 | -2.408 | 0.003904 |
| 0.135 | -2.407 | 0.003917 |
| 0.135 | -2.410 | 0.003894 |
| 0.136 | -2.417 | 0.003828 |
| 0.136 | -2.420 | 0.003805 |
| 0.137 | -2.424 | 0.003767 |
| 0.137 | -2.424 | 0.003764 |
| 0.138 | -2.429 | 0.003722 |

|       |        |          |
|-------|--------|----------|
| 0.138 | -2.434 | 0.003680 |
| 0.139 | -2.437 | 0.003655 |
| 0.139 | -2.433 | 0.003689 |
| 0.140 | -2.438 | 0.003651 |
| 0.140 | -2.446 | 0.003578 |
| 0.141 | -2.448 | 0.003566 |
| 0.141 | -2.451 | 0.003537 |
| 0.142 | -2.458 | 0.003484 |
| 0.142 | -2.458 | 0.003481 |
| 0.143 | -2.466 | 0.003423 |
| 0.143 | -2.466 | 0.003421 |
| 0.144 | -2.468 | 0.003405 |
| 0.144 | -2.465 | 0.003431 |
| 0.145 | -2.475 | 0.003350 |
| 0.145 | -2.481 | 0.003307 |
| 0.146 | -2.485 | 0.003272 |
| 0.146 | -2.485 | 0.003272 |
| 0.147 | -2.483 | 0.003285 |
| 0.147 | -2.491 | 0.003226 |
| 0.148 | -2.496 | 0.003189 |
| 0.148 | -2.491 | 0.003227 |
| 0.149 | -2.489 | 0.003246 |
| 0.149 | -2.491 | 0.003231 |
| 0.150 | -2.495 | 0.003198 |
| 0.150 | -2.502 | 0.003146 |
| 0.151 | -2.508 | 0.003101 |
| 0.151 | -2.510 | 0.003093 |
| 0.152 | -2.511 | 0.003080 |
| 0.152 | -2.514 | 0.003064 |
| 0.153 | -2.516 | 0.003050 |
| 0.153 | -2.521 | 0.003012 |
| 0.154 | -2.522 | 0.003006 |
| 0.154 | -2.528 | 0.002962 |
| 0.155 | -2.540 | 0.002883 |
| 0.155 | -2.539 | 0.002892 |
| 0.156 | -2.545 | 0.002850 |
| 0.156 | -2.547 | 0.002840 |
| 0.157 | -2.545 | 0.002849 |
| 0.157 | -2.543 | 0.002867 |
| 0.158 | -2.549 | 0.002827 |
| 0.158 | -2.546 | 0.002844 |
| 0.159 | -2.554 | 0.002795 |
| 0.159 | -2.561 | 0.002747 |
| 0.160 | -2.554 | 0.002794 |
| 0.160 | -2.552 | 0.002806 |
| 0.161 | -2.559 | 0.002764 |
| 0.161 | -2.560 | 0.002754 |
| 0.162 | -2.562 | 0.002740 |
| 0.162 | -2.566 | 0.002719 |
| 0.163 | -2.571 | 0.002683 |
| 0.163 | -2.576 | 0.002653 |
| 0.164 | -2.585 | 0.002603 |

|       |        |          |
|-------|--------|----------|
| 0.164 | -2.590 | 0.002571 |
| 0.165 | -2.599 | 0.002520 |
| 0.165 | -2.603 | 0.002493 |
| 0.166 | -2.601 | 0.002508 |
| 0.166 | -2.597 | 0.002529 |
| 0.167 | -2.594 | 0.002550 |
| 0.167 | -2.604 | 0.002486 |
| 0.168 | -2.605 | 0.002481 |
| 0.168 | -2.600 | 0.002512 |
| 0.169 | -2.613 | 0.002440 |
| 0.169 | -2.614 | 0.002435 |
| 0.170 | -2.618 | 0.002407 |
| 0.170 | -2.624 | 0.002374 |
| 0.171 | -2.617 | 0.002415 |
| 0.171 | -2.624 | 0.002376 |
| 0.172 | -2.630 | 0.002346 |
| 0.172 | -2.630 | 0.002345 |
| 0.173 | -2.630 | 0.002342 |
| 0.173 | -2.636 | 0.002314 |
| 0.174 | -2.644 | 0.002272 |
| 0.174 | -2.644 | 0.002272 |
| 0.175 | -2.644 | 0.002269 |
| 0.175 | -2.644 | 0.002272 |
| 0.176 | -2.648 | 0.002251 |
| 0.176 | -2.647 | 0.002256 |
| 0.177 | -2.651 | 0.002232 |
| 0.177 | -2.661 | 0.002183 |
| 0.178 | -2.655 | 0.002214 |
| 0.178 | -2.648 | 0.002247 |
| 0.179 | -2.668 | 0.002150 |
| 0.179 | -2.678 | 0.002099 |
| 0.180 | -2.673 | 0.002122 |
| 0.180 | -2.673 | 0.002125 |
| 0.181 | -2.674 | 0.002119 |
| 0.181 | -2.684 | 0.002068 |
| 0.182 | -2.686 | 0.002059 |
| 0.182 | -2.683 | 0.002073 |
| 0.183 | -2.686 | 0.002060 |
| 0.183 | -2.694 | 0.002023 |
| 0.184 | -2.700 | 0.001994 |
| 0.184 | -2.696 | 0.002016 |
| 0.185 | -2.689 | 0.002046 |
| 0.185 | -2.690 | 0.002042 |
| 0.186 | -2.702 | 0.001984 |
| 0.186 | -2.705 | 0.001972 |
| 0.187 | -2.703 | 0.001981 |
| 0.187 | -2.695 | 0.002018 |
| 0.188 | -2.705 | 0.001974 |
| 0.188 | -2.714 | 0.001930 |
| 0.189 | -2.714 | 0.001931 |
| 0.189 | -2.718 | 0.001916 |
| 0.190 | -2.720 | 0.001904 |

|       |        |          |
|-------|--------|----------|
| 0.190 | -2.734 | 0.001846 |
| 0.191 | -2.734 | 0.001846 |
| 0.191 | -2.725 | 0.001883 |
| 0.192 | -2.737 | 0.001830 |
| 0.192 | -2.748 | 0.001788 |
| 0.193 | -2.735 | 0.001842 |
| 0.193 | -2.737 | 0.001832 |
| 0.194 | -2.744 | 0.001803 |
| 0.194 | -2.756 | 0.001755 |
| 0.195 | -2.756 | 0.001754 |
| 0.195 | -2.762 | 0.001731 |
| 0.196 | -2.756 | 0.001753 |
| 0.196 | -2.753 | 0.001766 |
| 0.197 | -2.763 | 0.001727 |
| 0.197 | -2.768 | 0.001707 |
| 0.198 | -2.761 | 0.001734 |
| 0.198 | -2.759 | 0.001741 |
| 0.199 | -2.754 | 0.001762 |
| 0.200 | -2.755 | 0.001760 |
| 0.200 | -2.755 | 0.001759 |
| 0.201 | -2.760 | 0.001739 |
| 0.201 | -2.766 | 0.001715 |
| 0.202 | -2.772 | 0.001689 |
| 0.202 | -2.787 | 0.001631 |
| 0.203 | -2.785 | 0.001641 |
| 0.203 | -2.783 | 0.001650 |
| 0.204 | -2.789 | 0.001627 |
| 0.204 | -2.782 | 0.001652 |
| 0.205 | -2.787 | 0.001634 |
| 0.205 | -2.809 | 0.001552 |
| 0.206 | -2.816 | 0.001528 |
| 0.206 | -2.816 | 0.001529 |
| 0.207 | -2.813 | 0.001538 |
| 0.207 | -2.802 | 0.001578 |
| 0.208 | -2.802 | 0.001577 |
| 0.208 | -2.797 | 0.001595 |
| 0.209 | -2.808 | 0.001556 |
| 0.209 | -2.818 | 0.001520 |
| 0.210 | -2.811 | 0.001544 |
| 0.210 | -2.816 | 0.001528 |
| 0.211 | -2.828 | 0.001488 |
| 0.211 | -2.831 | 0.001476 |
| 0.212 | -2.822 | 0.001508 |
| 0.212 | -2.827 | 0.001490 |
| 0.213 | -2.830 | 0.001480 |
| 0.213 | -2.824 | 0.001500 |
| 0.214 | -2.836 | 0.001460 |
| 0.214 | -2.839 | 0.001450 |
| 0.215 | -2.849 | 0.001416 |
| 0.215 | -2.865 | 0.001365 |
| 0.216 | -2.855 | 0.001396 |
| 0.216 | -2.850 | 0.001414 |



|       |        |          |
|-------|--------|----------|
| 0.217 | -2.846 | 0.001426 |
| 0.217 | -2.846 | 0.001427 |
| 0.218 | -2.850 | 0.001413 |
| 0.218 | -2.857 | 0.001390 |
| 0.219 | -2.856 | 0.001393 |
| 0.219 | -2.866 | 0.001363 |
| 0.220 | -2.866 | 0.001361 |
| 0.220 | -2.866 | 0.001361 |
| 0.221 | -2.882 | 0.001312 |
| 0.221 | -2.889 | 0.001291 |
| 0.222 | -2.883 | 0.001309 |
| 0.222 | -2.882 | 0.001311 |
| 0.223 | -2.883 | 0.001308 |
| 0.223 | -2.886 | 0.001299 |
| 0.224 | -2.883 | 0.001310 |
| 0.224 | -2.885 | 0.001304 |
| 0.225 | -2.879 | 0.001322 |
| 0.225 | -2.881 | 0.001315 |
| 0.226 | -2.914 | 0.001220 |
| 0.226 | -2.916 | 0.001212 |
| 0.227 | -2.912 | 0.001224 |
| 0.227 | -2.903 | 0.001251 |
| 0.228 | -2.910 | 0.001229 |
| 0.228 | -2.913 | 0.001221 |
| 0.229 | -2.898 | 0.001264 |
| 0.229 | -2.901 | 0.001257 |
| 0.230 | -2.908 | 0.001235 |
| 0.230 | -2.917 | 0.001210 |
| 0.231 | -2.901 | 0.001256 |
| 0.231 | -2.901 | 0.001257 |
| 0.232 | -2.936 | 0.001159 |
| 0.232 | -2.957 | 0.001105 |
| 0.233 | -2.950 | 0.001123 |
| 0.233 | -2.937 | 0.001157 |
| 0.234 | -2.943 | 0.001141 |
| 0.234 | -2.966 | 0.001082 |
| 0.235 | -2.977 | 0.001055 |
| 0.235 | -2.954 | 0.001111 |
| 0.236 | -2.935 | 0.001161 |
| 0.236 | -2.939 | 0.001150 |
| 0.237 | -2.932 | 0.001170 |
| 0.237 | -2.935 | 0.001161 |
| 0.238 | -2.935 | 0.001160 |
| 0.238 | -2.944 | 0.001138 |
| 0.239 | -2.944 | 0.001138 |
| 0.239 | -2.947 | 0.001129 |
| 0.240 | -2.950 | 0.001121 |
| 0.240 | -2.955 | 0.001109 |
| 0.241 | -2.958 | 0.001100 |
| 0.241 | -2.964 | 0.001086 |
| 0.242 | -2.983 | 0.001040 |
| 0.242 | -2.973 | 0.001065 |

|       |        |          |
|-------|--------|----------|
| 0.243 | -2.981 | 0.001046 |
| 0.243 | -2.976 | 0.001057 |
| 0.244 | -2.977 | 0.001053 |
| 0.244 | -2.988 | 0.001028 |
| 0.245 | -2.995 | 0.001012 |
| 0.245 | -3.003 | 0.000994 |
| 0.246 | -2.990 | 0.001024 |
| 0.246 | -2.970 | 0.001072 |
| 0.247 | -2.962 | 0.001091 |
| 0.247 | -2.970 | 0.001071 |
| 0.248 | -2.987 | 0.001029 |
| 0.248 | -3.008 | 0.000981 |
| 0.249 | -3.001 | 0.000998 |
| 0.249 | -2.986 | 0.001032 |
| 0.250 | -3.006 | 0.000986 |
| 0.250 | -3.020 | 0.000954 |
| 0.251 | -3.014 | 0.000968 |
| 0.251 | -3.007 | 0.000984 |
| 0.252 | -3.019 | 0.000958 |
| 0.252 | -3.014 | 0.000967 |
| 0.253 | -3.021 | 0.000952 |
| 0.253 | -3.017 | 0.000962 |
| 0.254 | -3.028 | 0.000937 |
| 0.254 | -3.035 | 0.000924 |
| 0.255 | -3.046 | 0.000900 |
| 0.255 | -3.058 | 0.000875 |
| 0.256 | -3.039 | 0.000915 |
| 0.256 | -3.018 | 0.000959 |
| 0.257 | -3.004 | 0.000991 |
| 0.257 | -3.018 | 0.000959 |
| 0.258 | -3.016 | 0.000963 |
| 0.258 | -3.031 | 0.000932 |
| 0.259 | -3.039 | 0.000914 |
| 0.259 | -3.037 | 0.000918 |
| 0.260 | -3.016 | 0.000964 |
| 0.260 | -3.032 | 0.000930 |
| 0.261 | -3.035 | 0.000923 |
| 0.261 | -3.047 | 0.000898 |
| 0.262 | -3.072 | 0.000848 |
| 0.262 | -3.070 | 0.000852 |
| 0.263 | -3.060 | 0.000871 |
| 0.263 | -3.041 | 0.000909 |
| 0.264 | -3.051 | 0.000890 |
| 0.264 | -3.058 | 0.000874 |
| 0.265 | -3.063 | 0.000866 |
| 0.265 | -3.066 | 0.000859 |
| 0.266 | -3.056 | 0.000879 |
| 0.266 | -3.056 | 0.000879 |
| 0.267 | -3.074 | 0.000844 |
| 0.267 | -3.063 | 0.000866 |
| 0.268 | -3.083 | 0.000827 |
| 0.268 | -3.086 | 0.000821 |

|       |        |          |
|-------|--------|----------|
| 0.269 | -3.071 | 0.000849 |
| 0.269 | -3.052 | 0.000886 |
| 0.270 | -3.048 | 0.000895 |
| 0.270 | -3.074 | 0.000844 |
| 0.271 | -3.095 | 0.000804 |
| 0.271 | -3.103 | 0.000788 |
| 0.272 | -3.101 | 0.000792 |
| 0.272 | -3.095 | 0.000804 |
| 0.273 | -3.076 | 0.000840 |
| 0.273 | -3.093 | 0.000808 |
| 0.274 | -3.100 | 0.000794 |
| 0.274 | -3.089 | 0.000814 |
| 0.275 | -3.087 | 0.000818 |
| 0.275 | -3.094 | 0.000805 |
| 0.276 | -3.081 | 0.000830 |
| 0.276 | -3.099 | 0.000796 |
| 0.277 | -3.099 | 0.000797 |
| 0.277 | -3.084 | 0.000824 |
| 0.278 | -3.095 | 0.000804 |
| 0.278 | -3.109 | 0.000779 |
| 0.279 | -3.089 | 0.000815 |
| 0.279 | -3.112 | 0.000773 |
| 0.280 | -3.155 | 0.000700 |
| 0.281 | -3.135 | 0.000732 |
| 0.281 | -3.124 | 0.000751 |
| 0.282 | -3.110 | 0.000777 |
| 0.282 | -3.112 | 0.000772 |
| 0.283 | -3.125 | 0.000749 |
| 0.283 | -3.104 | 0.000786 |
| 0.284 | -3.118 | 0.000763 |
| 0.284 | -3.126 | 0.000748 |
| 0.285 | -3.114 | 0.000769 |
| 0.285 | -3.099 | 0.000796 |
| 0.286 | -3.088 | 0.000816 |
| 0.286 | -3.091 | 0.000812 |
| 0.287 | -3.111 | 0.000774 |
| 0.287 | -3.136 | 0.000732 |
| 0.288 | -3.146 | 0.000715 |
| 0.288 | -3.135 | 0.000733 |
| 0.289 | -3.143 | 0.000720 |
| 0.289 | -3.138 | 0.000728 |
| 0.290 | -3.143 | 0.000720 |
| 0.290 | -3.157 | 0.000697 |
| 0.291 | -3.166 | 0.000683 |
| 0.291 | -3.165 | 0.000684 |
| 0.292 | -3.165 | 0.000683 |
| 0.292 | -3.137 | 0.000729 |
| 0.293 | -3.160 | 0.000692 |
| 0.293 | -3.170 | 0.000676 |
| 0.294 | -3.179 | 0.000662 |
| 0.294 | -3.177 | 0.000666 |
| 0.295 | -3.155 | 0.000700 |

|       |        |          |
|-------|--------|----------|
| 0.295 | -3.148 | 0.000711 |
| 0.296 | -3.146 | 0.000714 |
| 0.296 | -3.181 | 0.000660 |
| 0.297 | -3.179 | 0.000662 |
| 0.297 | -3.151 | 0.000707 |
| 0.298 | -3.152 | 0.000704 |
| 0.298 | -3.180 | 0.000660 |
| 0.299 | -3.199 | 0.000633 |
| 0.299 | -3.180 | 0.000660 |
| 0.300 | -3.207 | 0.000621 |
| 0.300 | -3.191 | 0.000644 |
| 0.301 | -3.201 | 0.000629 |
| 0.301 | -3.199 | 0.000633 |
| 0.302 | -3.206 | 0.000622 |
| 0.302 | -3.167 | 0.000681 |
| 0.303 | -3.166 | 0.000682 |
| 0.303 | -3.197 | 0.000636 |
| 0.304 | -3.187 | 0.000649 |
| 0.304 | -3.181 | 0.000659 |
| 0.305 | -3.179 | 0.000662 |
| 0.305 | -3.182 | 0.000658 |
| 0.306 | -3.210 | 0.000617 |
| 0.306 | -3.209 | 0.000618 |
| 0.307 | -3.222 | 0.000600 |
| 0.307 | -3.193 | 0.000641 |
| 0.308 | -3.180 | 0.000661 |
| 0.308 | -3.178 | 0.000663 |
| 0.309 | -3.200 | 0.000631 |
| 0.309 | -3.226 | 0.000594 |
| 0.310 | -3.213 | 0.000612 |
| 0.310 | -3.187 | 0.000650 |
| 0.311 | -3.202 | 0.000628 |
| 0.311 | -3.226 | 0.000595 |
| 0.312 | -3.214 | 0.000610 |
| 0.312 | -3.192 | 0.000643 |
| 0.313 | -3.196 | 0.000637 |
| 0.313 | -3.198 | 0.000633 |
| 0.314 | -3.210 | 0.000616 |
| 0.314 | -3.209 | 0.000618 |
| 0.315 | -3.195 | 0.000639 |
| 0.315 | -3.204 | 0.000625 |
| 0.316 | -3.157 | 0.000696 |
| 0.316 | -3.077 | 0.000837 |
| 0.317 | -3.112 | 0.000773 |
| 0.317 | -3.185 | 0.000653 |
| 0.318 | -3.234 | 0.000584 |
| 0.318 | -3.224 | 0.000596 |
| 0.319 | -3.224 | 0.000598 |
| 0.319 | -3.254 | 0.000557 |
| 0.320 | -3.248 | 0.000565 |
| 0.320 | -3.286 | 0.000517 |
| 0.321 | -3.261 | 0.000548 |

|       |        |          |
|-------|--------|----------|
| 0.321 | -3.223 | 0.000599 |
| 0.322 | -3.270 | 0.000537 |
| 0.322 | -3.282 | 0.000523 |
| 0.323 | -3.240 | 0.000575 |
| 0.323 | -3.278 | 0.000528 |
| 0.324 | -3.293 | 0.000510 |
| 0.324 | -3.289 | 0.000514 |
| 0.325 | -3.284 | 0.000520 |
| 0.325 | -3.308 | 0.000492 |
| 0.326 | -3.286 | 0.000518 |
| 0.326 | -3.260 | 0.000549 |
| 0.327 | -3.266 | 0.000542 |
| 0.327 | -3.273 | 0.000534 |
| 0.328 | -3.249 | 0.000563 |
| 0.328 | -3.266 | 0.000542 |
| 0.329 | -3.241 | 0.000574 |
| 0.329 | -3.234 | 0.000583 |
| 0.330 | -3.267 | 0.000541 |
| 0.330 | -3.245 | 0.000569 |
| 0.331 | -3.246 | 0.000567 |
| 0.331 | -3.275 | 0.000531 |
| 0.332 | -3.251 | 0.000561 |
| 0.332 | -3.245 | 0.000569 |
| 0.333 | -3.287 | 0.000516 |
| 0.333 | -3.263 | 0.000546 |
| 0.334 | -3.253 | 0.000558 |
| 0.334 | -3.205 | 0.000623 |
| 0.335 | -3.194 | 0.000640 |
| 0.335 | -3.268 | 0.000539 |
| 0.336 | -3.288 | 0.000515 |
| 0.336 | -3.291 | 0.000512 |
| 0.337 | -3.272 | 0.000534 |
| 0.337 | -3.288 | 0.000515 |
| 0.338 | -3.290 | 0.000513 |
| 0.338 | -3.263 | 0.000546 |
| 0.339 | -3.252 | 0.000560 |
| 0.339 | -3.268 | 0.000539 |
| 0.340 | -3.289 | 0.000514 |
| 0.340 | -3.332 | 0.000465 |
| 0.341 | -3.330 | 0.000468 |
| 0.341 | -3.304 | 0.000496 |
| 0.342 | -3.297 | 0.000505 |
| 0.342 | -3.330 | 0.000468 |
| 0.343 | -3.356 | 0.000440 |
| 0.343 | -3.304 | 0.000497 |
| 0.344 | -3.311 | 0.000489 |
| 0.344 | -3.291 | 0.000512 |
| 0.345 | -3.325 | 0.000473 |
| 0.345 | -3.268 | 0.000540 |
| 0.346 | -3.290 | 0.000513 |
| 0.346 | -3.307 | 0.000493 |
| 0.347 | -3.320 | 0.000479 |

|       |        |          |
|-------|--------|----------|
| 0.347 | -3.378 | 0.000418 |
| 0.348 | -3.357 | 0.000440 |
| 0.348 | -3.348 | 0.000448 |
| 0.349 | -3.388 | 0.000409 |
| 0.349 | -3.302 | 0.000499 |
| 0.350 | -3.279 | 0.000526 |
| 0.350 | -3.285 | 0.000519 |
| 0.351 | -3.261 | 0.000549 |
| 0.351 | -3.270 | 0.000537 |
| 0.352 | -3.285 | 0.000519 |
| 0.352 | -3.285 | 0.000519 |
| 0.353 | -3.259 | 0.000551 |
| 0.353 | -3.297 | 0.000505 |
| 0.354 | -3.358 | 0.000438 |
| 0.354 | -3.362 | 0.000434 |
| 0.355 | -3.397 | 0.000401 |
| 0.355 | -3.386 | 0.000411 |
| 0.356 | -3.370 | 0.000427 |
| 0.356 | -3.363 | 0.000433 |
| 0.357 | -3.302 | 0.000498 |
| 0.357 | -3.280 | 0.000525 |
| 0.358 | -3.333 | 0.000464 |
| 0.358 | -3.363 | 0.000433 |
| 0.359 | -3.408 | 0.000391 |
| 0.359 | -3.431 | 0.000371 |
| 0.360 | -3.421 | 0.000379 |
| 0.360 | -3.371 | 0.000426 |
| 0.361 | -3.332 | 0.000465 |
| 0.361 | -3.342 | 0.000455 |
| 0.362 | -3.335 | 0.000462 |
| 0.362 | -3.334 | 0.000463 |
| 0.363 | -3.363 | 0.000433 |
| 0.363 | -3.398 | 0.000400 |
| 0.364 | -3.383 | 0.000414 |
| 0.364 | -3.364 | 0.000432 |
| 0.365 | -3.343 | 0.000454 |
| 0.365 | -3.345 | 0.000452 |
| 0.366 | -3.393 | 0.000404 |
| 0.366 | -3.349 | 0.000447 |
| 0.367 | -3.374 | 0.000422 |
| 0.367 | -3.354 | 0.000443 |
| 0.368 | -3.360 | 0.000436 |
| 0.368 | -3.387 | 0.000410 |
| 0.369 | -3.350 | 0.000447 |
| 0.369 | -3.363 | 0.000434 |
| 0.370 | -3.343 | 0.000454 |
| 0.370 | -3.357 | 0.000439 |
| 0.371 | -3.393 | 0.000404 |
| 0.371 | -3.329 | 0.000469 |
| 0.372 | -3.291 | 0.000512 |
| 0.372 | -3.339 | 0.000458 |
| 0.373 | -3.333 | 0.000464 |

|       |        |          |
|-------|--------|----------|
| 0.373 | -3.310 | 0.000489 |
| 0.374 | -3.314 | 0.000486 |
| 0.374 | -3.335 | 0.000463 |
| 0.375 | -3.336 | 0.000462 |
| 0.375 | -3.388 | 0.000409 |
| 0.376 | -3.355 | 0.000441 |
| 0.376 | -3.374 | 0.000423 |
| 0.377 | -3.350 | 0.000446 |
| 0.377 | -3.333 | 0.000465 |
| 0.378 | -3.360 | 0.000437 |
| 0.378 | -3.367 | 0.000429 |
| 0.379 | -3.386 | 0.000411 |
| 0.379 | -3.338 | 0.000459 |
| 0.380 | -3.308 | 0.000492 |
| 0.380 | -3.295 | 0.000507 |
| 0.381 | -3.350 | 0.000447 |
| 0.381 | -3.390 | 0.000407 |
| 0.382 | -3.357 | 0.000440 |
| 0.382 | -3.342 | 0.000455 |
| 0.383 | -3.338 | 0.000460 |
| 0.383 | -3.329 | 0.000469 |
| 0.384 | -3.358 | 0.000439 |
| 0.384 | -3.394 | 0.000404 |
| 0.385 | -3.446 | 0.000358 |
| 0.385 | -3.423 | 0.000378 |
| 0.386 | -3.406 | 0.000392 |
| 0.386 | -3.390 | 0.000407 |
| 0.387 | -3.387 | 0.000410 |
| 0.387 | -3.421 | 0.000380 |
| 0.388 | -3.459 | 0.000348 |
| 0.388 | -3.452 | 0.000353 |
| 0.389 | -3.438 | 0.000365 |
| 0.389 | -3.437 | 0.000366 |
| 0.390 | -3.462 | 0.000345 |
| 0.390 | -3.410 | 0.000389 |
| 0.391 | -3.373 | 0.000424 |
| 0.392 | -3.403 | 0.000395 |
| 0.392 | -3.379 | 0.000417 |
| 0.393 | -3.439 | 0.000364 |
| 0.393 | -3.464 | 0.000344 |
| 0.394 | -3.452 | 0.000353 |
| 0.394 | -3.474 | 0.000336 |
| 0.395 | -3.445 | 0.000359 |
| 0.395 | -3.410 | 0.000389 |
| 0.396 | -3.418 | 0.000382 |
| 0.396 | -3.406 | 0.000392 |
| 0.397 | -3.332 | 0.000466 |
| 0.397 | -3.303 | 0.000497 |
| 0.398 | -3.343 | 0.000454 |
| 0.398 | -3.425 | 0.000376 |
| 0.399 | -3.422 | 0.000379 |
| 0.399 | -3.394 | 0.000404 |

|       |        |          |
|-------|--------|----------|
| 0.400 | -3.452 | 0.000354 |
| 0.400 | -3.528 | 0.000296 |
| 0.401 | -3.467 | 0.000342 |
| 0.401 | -3.456 | 0.000350 |
| 0.402 | -3.436 | 0.000367 |
| 0.402 | -3.402 | 0.000397 |
| 0.403 | -3.391 | 0.000407 |
| 0.403 | -3.388 | 0.000409 |
| 0.404 | -3.383 | 0.000414 |
| 0.404 | -3.367 | 0.000429 |
| 0.405 | -3.367 | 0.000429 |
| 0.405 | -3.382 | 0.000415 |
| 0.406 | -3.429 | 0.000372 |
| 0.406 | -3.430 | 0.000371 |
| 0.407 | -3.443 | 0.000360 |
| 0.407 | -3.381 | 0.000416 |
| 0.408 | -3.331 | 0.000466 |
| 0.408 | -3.366 | 0.000431 |
| 0.409 | -3.437 | 0.000366 |
| 0.409 | -3.433 | 0.000369 |
| 0.410 | -3.424 | 0.000377 |
| 0.410 | -3.425 | 0.000376 |
| 0.411 | -3.459 | 0.000347 |
| 0.411 | -3.475 | 0.000335 |
| 0.412 | -3.478 | 0.000333 |
| 0.412 | -3.406 | 0.000393 |
| 0.413 | -3.435 | 0.000368 |
| 0.413 | -3.490 | 0.000324 |
| 0.414 | -3.459 | 0.000348 |
| 0.414 | -3.475 | 0.000335 |
| 0.415 | -3.456 | 0.000350 |
| 0.415 | -3.451 | 0.000354 |
| 0.416 | -3.532 | 0.000293 |
| 0.416 | -3.542 | 0.000287 |
| 0.417 | -3.379 | 0.000418 |
| 0.417 | -3.381 | 0.000416 |
| 0.418 | -3.415 | 0.000385 |
| 0.418 | -3.429 | 0.000372 |
| 0.419 | -3.385 | 0.000412 |
| 0.419 | -3.395 | 0.000402 |
| 0.420 | -3.389 | 0.000408 |
| 0.420 | -3.459 | 0.000348 |
| 0.421 | -3.460 | 0.000347 |
| 0.421 | -3.459 | 0.000348 |
| 0.422 | -3.465 | 0.000343 |
| 0.422 | -3.444 | 0.000360 |
| 0.423 | -3.454 | 0.000351 |
| 0.423 | -3.476 | 0.000334 |
| 0.424 | -3.586 | 0.000260 |
| 0.424 | -3.532 | 0.000294 |
| 0.425 | -3.469 | 0.000340 |
| 0.425 | -3.461 | 0.000346 |



|       |        |          |
|-------|--------|----------|
| 0.426 | -3.467 | 0.000341 |
| 0.426 | -3.448 | 0.000356 |
| 0.427 | -3.401 | 0.000397 |
| 0.427 | -3.391 | 0.000406 |
| 0.428 | -3.345 | 0.000452 |
| 0.428 | -3.369 | 0.000428 |
| 0.429 | -3.445 | 0.000359 |
| 0.429 | -3.403 | 0.000396 |
| 0.430 | -3.417 | 0.000383 |
| 0.430 | -3.426 | 0.000375 |
| 0.431 | -3.445 | 0.000359 |
| 0.431 | -3.408 | 0.000391 |
| 0.432 | -3.391 | 0.000406 |
| 0.432 | -3.348 | 0.000448 |
| 0.433 | -3.369 | 0.000428 |
| 0.433 | -3.405 | 0.000394 |
| 0.434 | -3.411 | 0.000388 |
| 0.434 | -3.447 | 0.000357 |
| 0.435 | -3.451 | 0.000354 |
| 0.435 | -3.418 | 0.000382 |
| 0.436 | -3.429 | 0.000373 |
| 0.436 | -3.331 | 0.000467 |
| 0.437 | -3.408 | 0.000391 |
| 0.437 | -3.430 | 0.000372 |
| 0.438 | -3.402 | 0.000396 |
| 0.438 | -3.348 | 0.000449 |
| 0.439 | -3.328 | 0.000470 |
| 0.439 | -3.387 | 0.000410 |
| 0.440 | -3.395 | 0.000403 |
| 0.440 | -3.398 | 0.000400 |
| 0.441 | -3.466 | 0.000342 |
| 0.441 | -3.474 | 0.000336 |
| 0.442 | -3.469 | 0.000339 |
| 0.442 | -3.430 | 0.000372 |
| 0.443 | -3.379 | 0.000418 |
| 0.443 | -3.326 | 0.000472 |
| 0.444 | -3.339 | 0.000458 |
| 0.444 | -3.372 | 0.000425 |
| 0.445 | -3.391 | 0.000406 |
| 0.445 | -3.428 | 0.000373 |
| 0.446 | -3.442 | 0.000362 |
| 0.446 | -3.524 | 0.000299 |
| 0.447 | -3.460 | 0.000347 |
| 0.447 | -3.447 | 0.000358 |
| 0.448 | -3.484 | 0.000328 |
| 0.448 | -3.565 | 0.000272 |
| 0.449 | -3.494 | 0.000320 |
| 0.449 | -3.457 | 0.000350 |
| 0.450 | -3.492 | 0.000322 |
| 0.450 | -3.470 | 0.000339 |
| 0.451 | -3.373 | 0.000424 |
| 0.451 | -3.399 | 0.000399 |

|       |        |          |
|-------|--------|----------|
| 0.452 | -3.480 | 0.000331 |
| 0.452 | -3.416 | 0.000384 |
| 0.453 | -3.431 | 0.000371 |
| 0.453 | -3.475 | 0.000335 |
| 0.454 | -3.426 | 0.000375 |
| 0.454 | -3.485 | 0.000327 |
| 0.455 | -3.465 | 0.000343 |
| 0.455 | -3.417 | 0.000383 |
| 0.456 | -3.391 | 0.000407 |
| 0.456 | -3.435 | 0.000367 |
| 0.457 | -3.474 | 0.000336 |
| 0.457 | -3.510 | 0.000309 |
| 0.458 | -3.448 | 0.000357 |
| 0.458 | -3.407 | 0.000392 |
| 0.459 | -3.451 | 0.000354 |
| 0.459 | -3.607 | 0.000247 |
| 0.460 | -3.633 | 0.000233 |
| 0.460 | -3.523 | 0.000300 |
| 0.461 | -3.491 | 0.000322 |
| 0.461 | -3.463 | 0.000344 |
| 0.462 | -3.436 | 0.000367 |
| 0.462 | -3.435 | 0.000367 |
| 0.463 | -3.574 | 0.000267 |
| 0.463 | -3.533 | 0.000293 |
| 0.464 | -3.439 | 0.000364 |
| 0.464 | -3.378 | 0.000419 |
| 0.465 | -3.444 | 0.000360 |
| 0.465 | -3.467 | 0.000341 |
| 0.466 | -3.475 | 0.000335 |
| 0.466 | -3.507 | 0.000311 |
| 0.467 | -3.465 | 0.000343 |
| 0.467 | -3.415 | 0.000385 |
| 0.468 | -3.399 | 0.000399 |
| 0.468 | -3.445 | 0.000359 |
| 0.469 | -3.430 | 0.000372 |
| 0.469 | -3.384 | 0.000413 |
| 0.470 | -3.455 | 0.000351 |
| 0.470 | -3.500 | 0.000316 |
| 0.471 | -3.466 | 0.000342 |
| 0.471 | -3.399 | 0.000399 |
| 0.472 | -3.441 | 0.000362 |
| 0.472 | -3.449 | 0.000356 |
| 0.473 | -3.522 | 0.000301 |
| 0.473 | -3.542 | 0.000287 |
| 0.474 | -3.594 | 0.000254 |
| 0.474 | -3.587 | 0.000259 |
| 0.475 | -3.581 | 0.000263 |
| 0.475 | -3.535 | 0.000292 |
| 0.476 | -3.555 | 0.000279 |
| 0.476 | -3.491 | 0.000323 |
| 0.477 | -3.526 | 0.000298 |
| 0.477 | -3.551 | 0.000281 |

|       |        |          |
|-------|--------|----------|
| 0.478 | -3.579 | 0.000264 |
| 0.478 | -3.652 | 0.000223 |
| 0.479 | -3.550 | 0.000282 |
| 0.479 | -3.499 | 0.000317 |
| 0.480 | -3.437 | 0.000366 |
| 0.480 | -3.502 | 0.000315 |
| 0.481 | -3.475 | 0.000335 |
| 0.481 | -3.410 | 0.000389 |
| 0.482 | -3.410 | 0.000389 |
| 0.482 | -3.432 | 0.000370 |
| 0.483 | -3.505 | 0.000313 |
| 0.483 | -3.558 | 0.000277 |
| 0.484 | -3.504 | 0.000313 |
| 0.484 | -3.448 | 0.000357 |
| 0.485 | -3.448 | 0.000356 |
| 0.485 | -3.555 | 0.000278 |
| 0.486 | -3.484 | 0.000328 |
| 0.486 | -3.556 | 0.000278 |
| 0.487 | -3.574 | 0.000267 |
| 0.487 | -3.681 | 0.000208 |
| 0.488 | -3.604 | 0.000249 |
| 0.488 | -3.465 | 0.000343 |
| 0.489 | -3.457 | 0.000349 |
| 0.489 | -3.461 | 0.000346 |
| 0.490 | -3.505 | 0.000312 |
| 0.490 | -3.620 | 0.000240 |
| 0.491 | -3.572 | 0.000268 |
| 0.491 | -3.632 | 0.000233 |
| 0.492 | -3.640 | 0.000229 |
| 0.492 | -3.498 | 0.000318 |
| 0.493 | -3.470 | 0.000339 |
| 0.493 | -3.471 | 0.000338 |
| 0.494 | -3.436 | 0.000366 |
| 0.494 | -3.558 | 0.000276 |
| 0.495 | -3.629 | 0.000235 |
| 0.495 | -3.556 | 0.000278 |
| 0.496 | -3.617 | 0.000242 |
| 0.496 | -3.556 | 0.000278 |
| 0.497 | -3.401 | 0.000397 |
| 0.497 | -3.402 | 0.000396 |
| 0.498 | -3.515 | 0.000306 |
| 0.498 | -3.459 | 0.000348 |
| 0.499 | -3.421 | 0.000379 |
| 0.499 | -3.491 | 0.000323 |
| 0.500 | -3.661 | 0.000218 |
| 0.500 | -3.550 | 0.000282 |
| 0.501 | -3.436 | 0.000366 |
| 0.501 | -3.530 | 0.000295 |
| 0.502 | -3.673 | 0.000212 |
| 0.502 | -3.780 | 0.000166 |
| 0.503 | -3.751 | 0.000177 |
| 0.503 | -3.550 | 0.000282 |

|       |        |          |
|-------|--------|----------|
| 0.504 | -3.590 | 0.000257 |
| 0.504 | -3.717 | 0.000192 |
| 0.505 | -3.835 | 0.000146 |
| 0.505 | -3.655 | 0.000221 |
| 0.506 | -3.550 | 0.000282 |
| 0.506 | -3.405 | 0.000394 |
| 0.507 | -3.391 | 0.000406 |
| 0.507 | -3.616 | 0.000242 |
| 0.508 | -3.514 | 0.000307 |
| 0.508 | -3.505 | 0.000312 |
| 0.509 | -3.607 | 0.000247 |
| 0.509 | -3.463 | 0.000344 |
| 0.510 | -3.421 | 0.000379 |
| 0.510 | -3.646 | 0.000226 |
| 0.511 | -3.710 | 0.000195 |
| 0.511 | -3.718 | 0.000191 |
| 0.512 | -3.558 | 0.000277 |
| 0.512 | -3.481 | 0.000330 |
| 0.513 | -3.529 | 0.000296 |
| 0.513 | -3.539 | 0.000289 |
| 0.514 | -3.742 | 0.000181 |
| 0.514 | -3.458 | 0.000349 |
| 0.515 | -3.347 | 0.000450 |
| 0.515 | -3.404 | 0.000394 |
| 0.516 | -3.638 | 0.000230 |
| 0.516 | -3.620 | 0.000240 |
| 0.517 | -3.432 | 0.000370 |
| 0.517 | -3.436 | 0.000367 |
| 0.518 | -3.462 | 0.000345 |
| 0.518 | -3.508 | 0.000310 |
| 0.519 | -3.888 | 0.000129 |
| 0.519 | -3.737 | 0.000183 |
| 0.520 | -3.687 | 0.000206 |
| 0.520 | -4.084 | 0.000082 |
| 0.521 | -3.583 | 0.000261 |
| 0.521 | -3.484 | 0.000328 |
| 0.522 | -3.788 | 0.000163 |
| 0.522 | -3.758 | 0.000175 |
| 0.523 | -3.893 | 0.000128 |
| 0.523 | -4.626 | 0.000024 |
| 0.524 | -3.599 | 0.000252 |
| 0.524 | -3.966 | 0.000108 |
| 0.525 | -3.844 | 0.000143 |
| 0.525 | -3.545 | 0.000285 |
| 0.526 | -3.524 | 0.000299 |
| 0.526 | -3.647 | 0.000225 |
| 0.527 | -3.507 | 0.000311 |
| 0.527 | -3.477 | 0.000333 |
| 0.528 | -3.398 | 0.000400 |
| 0.528 | -3.238 | 0.000578 |
| 0.529 | -3.314 | 0.000485 |
| 0.529 | -3.436 | 0.000367 |

|       |        |          |
|-------|--------|----------|
| 0.530 | -3.460 | 0.000347 |
| 0.530 | -3.362 | 0.000435 |
| 0.531 | -3.225 | 0.000596 |
| 0.531 | -3.222 | 0.000599 |
| 0.532 | -3.431 | 0.000371 |
| 0.532 | -3.678 | 0.000210 |
| 0.533 | -3.711 | 0.000195 |
| 0.533 | -3.376 | 0.000420 |
| 0.534 | -3.534 | 0.000293 |
| 0.534 | -3.819 | 0.000152 |
| 0.536 | -3.370 | 0.000427 |
| 0.537 | -3.502 | 0.000315 |
| 0.537 | -3.614 | 0.000243 |
| 0.538 | -3.452 | 0.000353 |
| 0.538 | -3.755 | 0.000176 |
| 0.539 | -3.206 | 0.000622 |
| 0.539 | -3.094 | 0.000806 |
