# Supplementary material for: DNA Binding of the Cell Cycle Transcriptional Regulator GcrA Depends on N6-Adenosine Methylation in Caulobacter crescentus and Other Alphaproteobacteria
Source: PubMed Central journal article supplement (PMC3667746; doi:10.1371/journal.pgen.1003541), 2013-05-30
Supplement: pgen.1003541.s014.pdf [file pgen.1003541.s014.pdf]

| Peak maximum (nt position in NA1000) | Height (number of reads) | Closest gene start | Strand | GANTC methylation sites |
|--------------------------------------|--------------------------|--------------------|--------|-------------------------|
| 757214                               | 1607.84908               | CCNA_00697         | 0      | 4                       |
| 2766545                              | 1340.684383              | CCNA_02617         | 0      | 1                       |
| 3240749                              | 1274.696054              | CCNA_03092         | 1      | 7                       |
| 853657                               | 1249.510308              | CCNA_00790         | 1      | 1                       |
| 1574607                              | 1237.130047              | CCNA_01467         | 1      | 2                       |
| 3676529                              | 1229.489792              | CCNA_03518         | 0      | 2                       |
| 3673685                              | 1156.479156              | CCNA_03516         | 0      | 2                       |
| 2279319                              | 1144.701866              | CCNA_02126         | 1      | 5                       |
| 721839                               | 1143.975009              | CCNA_00665         | 1      | 2                       |
| 292314                               | 1108.752766              | CCNA_00279         | 1      | 0                       |
| 1812369                              | 1073.67743               | CCNA_01684         | 0      | 2                       |
| 3854853                              | 1045.903403              | CCNA_03689         | 1      | 2                       |
| 3376200                              | 979.247797               | CCNA_03214         | 0      | 2                       |
| 2349723                              | 977.380465               | CCNA_02200         | 0      | 2                       |
| 864798                               | 975.2115345              | CCNA_00800         | 1      | 0                       |
| 1632212                              | 913.122217               | CCNA_01523         | 0      | 1                       |
| 3215023                              | 904.9247305              | CCNA_03062         | 0      | 5                       |
| 2867923                              | 872.4536166              | -                  | 0      | 1                       |
| 3976528                              | 839.0294446              | CCNA_03813         | 1      | 4                       |
| 1917883                              | 836.4550302              | CCNA_01791         | 1      | 1                       |
| 136696                               | 834.6053674              | CCNA_00126         | 0      | 1                       |
| 2940437                              | 825.5585172              | CCNA_02782         | 0      | 3                       |
| 920769                               | 821.0088263              | CCNA_00847         | 1      | 0                       |
| 861176                               | 820.0753908              | CCNA_00796         | 0      | 0                       |
| 813315                               | 806.7680845              | CCNA_00754         | 0      | 0                       |
| 484581                               | 791.754344               | -                  | 0      | 0                       |
| 1213723                              | 768.4076388              | CCNA_01108         | 0      | 4                       |
| 1491807                              | 758.7170666              | -                  | 0      | 0                       |
| 3240410                              | 741.4531948              | CCNA_03091         | 1      | 8                       |
| 568875                               | 741.2500911              | CCNA_00551         | 0      | 2                       |
| 2294257                              | 737.9556949              | CCNA_02136         | 0      | 1                       |
| 1583469                              | 727.0637471              | CCNA_01476         | 1      | 0                       |
| 1272541                              | 716.5360305              | CCNA_01163         | 1      | 1                       |
| 929113                               | 714.3068704              | CCNA_00854         | 1      | 1                       |
| 3764128                              | 692.5839505              | CCNA_03609         | 0      | 2                       |
| 3904026                              | 688.1558129              | CCNA_03734         | 0      | 0                       |
| 2727779                              | 677.1672756              | CCNA_02576         | 1      | 3                       |
| 3860010                              | 673.8175102              | CCNA_03694         | 1      | 0                       |
| 1057152                              | 653.160436               | CCNA_00977         | 1      | 5                       |
| 3573948                              | 644.8775698              | CCNA_03406         | 1      | 2                       |
| 215237                               | 643.285953               | CCNA_00201         | 1      | 1                       |
| 1081928                              | 638.3206506              | CCNA_00999         | 1      | 7                       |
| 2152403                              | 623.979405               | CCNA_02003         | 0      | 3                       |
| 1639320                              | 622.4050809              | CCNA_01532         | 1      | 4                       |
| 2445754                              | 620.2120944              | CCNA_02299         | 1      | 3                       |
| 2108149                              | 616.1845584              | CCNA_01966         | 1      | 1                       |
| 48961                                | 611.0390459              | CCNA_00044         | 0      | 3                       |
| 2186900                              | 610.0562312              | CCNA_02041         | 0      | 1                       |
| 1983866                              | 609.3718079              | CCNA_01851         | 0      | 0                       |
| 3547252                              | 605.1256119              | CCNA_03371         | 0      | 2                       |
| 1755833                              | 603.1284043              | CCNA_01637         | 1      | 3                       |
| 1176239                              | 599.5615142              | -                  | 0      | 0                       |
| 3994429                              | 593.5048097              | CCNA_03830         | 1      | 3                       |

|         |             |            |   |   |
|---------|-------------|------------|---|---|
| 2960581 | 587.8380285 | CCNA_02805 | 1 | 2 |
| 2435683 | 583.0533325 | CCNA_02287 | 1 | 2 |
| 406003  | 582.6219374 | CCNA_00390 | 1 | 1 |
| 3975756 | 580.9789969 | CCNA_03811 | 0 | 1 |
| 2396055 | 566.5476575 | CCNA_02246 | 0 | 2 |
| 634994  | 562.7829258 | CCNA_00598 | 0 | 1 |
| 278021  | 559.106736  | CCNA_00265 | 1 | 0 |
| 519938  | 552.0430734 | CCNA_00504 | 0 | 1 |
| 2773202 | 548.4620861 | CCNA_02623 | 0 | 2 |
| 3798041 | 537.7561563 | CCNA_03638 | 0 | 1 |
| 58628   | 525.5947236 | CCNA_00055 | 0 | 2 |
| 2543464 | 524.1480847 | CCNA_02401 | 1 | 1 |
| 2868260 | 517.6871245 | CCNA_02708 | 1 | 1 |
| 3184764 | 514.1951846 | CCNA_03029 | 0 | 3 |
| 404079  | 508.2508497 | CCNA_00388 | 0 | 1 |
| 2577623 | 508.1107197 | CCNA_02436 | 0 | 4 |
| 3702058 | 500.985044  | CCNA_03545 | 1 | 0 |
| 3618089 | 500.7682216 | -          | 0 | 2 |
| 2866441 | 496.1437569 | -          | 0 | 0 |
| 938858  | 493.8343185 | CCNA_00860 | 0 | 1 |
| 1159110 | 493.6191007 | CCNA_01057 | 0 | 0 |
| 856077  | 491.9221678 | CCNA_00793 | 1 | 3 |
| 1628284 | 489.5975999 | CCNA_01519 | 1 | 0 |
| 304379  | 488.0371371 | CCNA_00291 | 1 | 4 |
| 3426577 | 486.3599835 | CCNA_03255 | 0 | 0 |
| 3818458 | 484.002705  | CCNA_03656 | 0 | 3 |
| 1985446 | 483.8455731 | CCNA_01853 | 1 | 4 |
| 2589801 | 483.5754687 | CCNA_02449 | 1 | 3 |
| 20783   | 483.5668386 | CCNA_00020 | 0 | 2 |
| 2750336 | 482.3721182 | CCNA_02604 | 0 | 0 |
| 2290387 | 477.8848845 | CCNA_02133 | 0 | 0 |
| 1159638 | 472.6763432 | CCNA_01059 | 1 | 1 |
| 290091  | 472.0939434 | CCNA_00276 | 0 | 0 |
| 2236239 | 470.5136949 | CCNA_02086 | 0 | 2 |
| 1815944 | 470.0474954 | CCNA_01689 | 1 | 3 |
| 3720829 | 467.9571091 | CCNA_03567 | 1 | 2 |
| 2239171 | 463.424966  | CCNA_02091 | 1 | 2 |
| 2338501 | 463.2597591 | -          | 0 | 2 |
| 4022960 | 461.0859555 | CCNA_03859 | 0 | 2 |
| 2178231 | 457.5930894 | -          | 0 | 0 |
| 281915  | 457.5861075 | CCNA_00267 | 0 | 5 |
| 899898  | 456.8870776 | -          | 0 | 1 |
| 998588  | 454.6077138 | CCNA_00922 | 1 | 1 |
| 3874323 | 453.9262748 | -          | 0 | 1 |
| 1653488 | 451.9707307 | CCNA_01542 | 0 | 3 |
| 370406  | 449.7225859 | CCNA_00354 | 1 | 0 |
| 2560092 | 447.9432303 | CCNA_02416 | 1 | 3 |
| 2936623 | 443.3308244 | CCNA_02779 | 1 | 2 |
| 735527  | 437.4537652 | CCNA_00679 | 1 | 2 |
| 338448  | 435.1270375 | CCNA_00325 | 0 | 4 |
| 1541385 | 433.5805365 | CCNA_01425 | 1 | 2 |
| 1895418 | 430.127904  | CCNA_01766 | 0 | 1 |
| 335837  | 428.2773758 | CCNA_00321 | 0 | 5 |
| 2663293 | 428.1947558 | CCNA_02512 | 0 | 2 |
| 477396  | 421.8383028 | CCNA_00464 | 1 | 5 |
| 2889903 | 419.7436702 | CCNA_02726 | 0 | 4 |
| 454829  | 417.1291908 | CCNA_00450 | 1 | 2 |
| 2145117 | 415.9123835 | CCNA_01998 | 0 | 1 |

|         |             |            |   |   |
|---------|-------------|------------|---|---|
| 1634112 | 413.1833031 | CCNA_01524 | 0 | 4 |
| 3506609 | 408.8727669 | CCNA_03326 | 1 | 1 |
| 2044475 | 408.0094772 | CCNA_01901 | 0 | 3 |
| 3750251 | 406.8668607 | CCNA_03598 | 1 | 2 |
| 4812    | 405.2941038 | CCNA_00007 | 1 | 2 |
| 3931447 | 402.652319  | CCNA_03762 | 1 | 1 |
| 3279769 | 402.2195688 | CCNA_03130 | 0 | 2 |
| 3294542 | 402.0392072 | CCNA_03143 | 0 | 1 |
| 314531  | 401.5611581 | CCNA_00300 | 0 | 2 |
| 3594186 | 398.9976831 | CCNA_03430 | 0 | 1 |
| 3882816 | 397.8305991 | CCNA_03718 | 1 | 4 |
| 2177490 | 397.5428607 | CCNA_02033 | 0 | 2 |
| 1431119 | 396.9402413 | CCNA_01305 | 1 | 3 |
| 511840  | 395.8003579 | CCNA_00495 | 1 | 1 |
| 2317078 | 395.4347381 | CCNA_02162 | 0 | 3 |
| 1423062 | 393.6724819 | CCNA_01297 | 0 | 2 |
| 1534753 | 393.4176638 | CCNA_01417 | 1 | 1 |
| 2676563 | 392.3034402 | CCNA_02528 | 1 | 1 |
| 1812872 | 389.6968652 | CCNA_01686 | 1 | 6 |
| 83965   | 388.4843013 | CCNA_00079 | 0 | 0 |
| 567065  | 387.9091641 | CCNA_00550 | 1 | 1 |
| 945883  | 386.4580559 | CCNA_00866 | 0 | 0 |
| 1211146 | 383.5970212 | CCNA_01105 | 1 | 3 |
| 1672239 | 383.0061478 | CCNA_01556 | 1 | 2 |
| 1638717 | 382.6787835 | CCNA_01531 | 1 | 1 |
| 2974835 | 382.263418  | CCNA_02818 | 1 | 2 |
| 76216   | 380.8698369 | -          | 0 | 0 |
| 3487644 | 377.4401113 | CCNA_03312 | 1 | 2 |
| 30187   | 376.1729875 | CCNA_00027 | 0 | 1 |
| 1348022 | 373.303679  | CCNA_01221 | 0 | 3 |
| 4028743 | 372.5249152 | CCNA_03866 | 1 | 2 |
| 1845852 | 372.3835529 | CCNA_01715 | 1 | 3 |
| 3159561 | 371.2253879 | CCNA_03006 | 1 | 1 |
| 2822621 | 368.0305798 | CCNA_02669 | 0 | 1 |
| 1199270 | 365.1888206 | CCNA_01094 | 0 | 0 |
| 3451017 | 364.9913468 | CCNA_03280 | 0 | 2 |
| 1136909 | 364.9347964 | CCNA_01041 | 0 | 1 |
| 804893  | 364.2798798 | CCNA_00747 | 0 | 3 |
| 473497  | 363.255243  | -          | 0 | 0 |
| 3136383 | 358.2181559 | CCNA_02980 | 0 | 1 |
| 2465200 | 357.0792323 | CCNA_02323 | 0 | 0 |
| 433212  | 356.8610447 | CCNA_00422 | 0 | 0 |
| 1301880 | 356.4749123 | CCNA_01181 | 0 | 6 |
| 3256857 | 356.0627561 | CCNA_03107 | 1 | 3 |
| 3101495 | 355.7189436 | CCNA_02941 | 1 | 0 |
| 2832658 | 354.6562442 | CCNA_02679 | 0 | 2 |
| 1602083 | 353.263304  | CCNA_01492 | 0 | 1 |
| 2245237 | 350.0886007 | CCNA_02096 | 0 | 2 |
| 2692183 | 349.9094452 | CCNA_02543 | 1 | 3 |
| 506644  | 349.6343646 | CCNA_00488 | 0 | 0 |
| 482835  | 348.140722  | -          | 0 | 0 |
| 3571156 | 348.0348256 | CCNA_03401 | 0 | 0 |
| 2391799 | 345.9536292 | CCNA_02243 | 1 | 1 |
| 1094491 | 345.524169  | -          | 0 | 0 |
| 582139  | 345.4345942 | -          | 0 | 3 |
| 2434066 | 344.984723  | CCNA_02283 | 0 | 2 |
| 2147264 | 342.5612811 | CCNA_02000 | 0 | 1 |
| 1781924 | 342.1028442 | CCNA_01660 | 0 | 2 |

|         |             |            |   |   |
|---------|-------------|------------|---|---|
| 38748   | 337.4711167 | CCNA_00034 | 0 | 0 |
| 3906409 | 337.3970439 | CCNA_03736 | 1 | 3 |
| 3834205 | 336.4376683 | CCNA_03674 | 0 | 2 |
| 2864978 | 336.2670888 | -          | 0 | 0 |
| 1901987 | 335.9798576 | CCNA_01776 | 1 | 1 |
| 2923184 | 335.6564907 | CCNA_02760 | 1 | 1 |
| 1564911 | 334.438289  | -          | 0 | 2 |
| 1395561 | 334.2408186 | CCNA_01265 | 0 | 2 |
| 2158027 | 333.2432798 | CCNA_02011 | 0 | 1 |
| 3459093 | 332.7920107 | CCNA_03291 | 0 | 3 |
| 2185233 | 332.1433833 | CCNA_02039 | 0 | 1 |
| 74002   | 331.5297844 | -          | 0 | 2 |
| 3565550 | 330.3684024 | CCNA_03394 | 1 | 2 |
| 1529188 | 328.7483831 | CCNA_01410 | 0 | 1 |
| 844333  | 328.2983073 | CCNA_00782 | 0 | 0 |
| 1771266 | 327.6455251 | CCNA_01651 | 1 | 2 |
| 2383606 | 327.3070942 | CCNA_02235 | 1 | 1 |
| 1856369 | 327.2219559 | CCNA_01727 | 0 | 3 |
| 718869  | 327.0062849 | CCNA_00660 | 0 | 1 |
| 967794  | 324.5636945 | CCNA_00889 | 0 | 2 |
| 166601  | 324.3979886 | CCNA_00159 | 1 | 4 |
| 1582559 | 322.26797   | CCNA_01475 | 1 | 1 |
| 1956579 | 321.3128824 | CCNA_01830 | 1 | 1 |
| 67929   | 320.7691983 | -          | 0 | 0 |
| 52174   | 320.1099657 | CCNA_00048 | 0 | 4 |
| 2103414 | 317.3811563 | CCNA_01957 | 0 | 2 |
| 2551882 | 317.205461  | CCNA_02408 | 0 | 2 |
| 1191123 | 316.2182902 | CCNA_01085 | 0 | 2 |
| 708255  | 316.1653282 | CCNA_00655 | 0 | 0 |
| 2227213 | 314.3368512 | CCNA_02076 | 0 | 1 |
| 2709507 | 313.6640792 | -          | 0 | 0 |
| 2289183 | 313.6294944 | CCNA_02132 | 0 | 3 |
| 2570916 | 312.9829764 | CCNA_02428 | 0 | 3 |
| 170864  | 312.0624163 | CCNA_00161 | 1 | 1 |
| 1266850 | 311.2933456 | CCNA_01159 | 1 | 1 |
| 4025307 | 310.92048   | CCNA_03864 | 1 | 4 |
| 670390  | 310.7975982 | CCNA_00624 | 0 | 2 |
| 2090245 | 310.5833948 | CCNA_01948 | 1 | 1 |
| 1571958 | 309.5078316 | CCNA_01463 | 0 | 2 |
| 842265  | 307.1841786 | -          | 0 | 1 |
| 2097120 | 306.6811044 | CCNA_01952 | 0 | 2 |
| 66256   | 306.4190371 | CCNA_00063 | 0 | 0 |
| 1113601 | 303.2646094 | CCNA_01026 | 0 | 0 |
| 981708  | 303.1098257 | CCNA_00901 | 0 | 2 |
| 2710573 | 302.6483671 | CCNA_02562 | 0 | 3 |
| 2863441 | 302.2357208 | -          | 0 | 0 |
| 1140073 | 302.1554094 | CCNA_01044 | 1 | 0 |
| 368532  | 301.8856903 | CCNA_00352 | 0 | 0 |
| 2408835 | 301.0811232 | CCNA_02256 | 0 | 5 |
