# Supplementary material for: DNA Binding of the Cell Cycle Transcriptional Regulator GcrA Depends on N6-Adenosine Methylation in Caulobacter crescentus and Other Alphaproteobacteria
Source: PubMed Central journal article supplement (PMC3667746; doi:10.1371/journal.pgen.1003541), 2013-05-30
Supplement: pgen.1003541.s015.pdf [file pgen.1003541.s015.pdf]

| Start..end   | Strand | Product length | gene name | Gene code  | Z-score coverage ChIP-seq GcrA in wt |
|--------------|--------|----------------|-----------|------------|--------------------------------------|
| 4945..5235   | +      | 96             | rpsT      | CCNA_00007 | 2.559813191                          |
| 20444..20668 | -      | 74             | -         | CCNA_00020 | 2.376856495                          |
| 48271..48846 | -      | 191            | -         | CCNA_00044 | 3.400383997                          |
| 49105..49638 | +      | 177            | -         | CCNA_00045 | 3.287447357                          |
| 58201..58608 | -      | 135            | -         | CCNA_00055 | 2.319018145                          |
| 83414..83893 | -      | 159            | -         | CCNA_00079 | 2.40745932                           |
| 84087..84728 | +      | 213            | -         | CCNA_00080 | 2.407360282                          |
| 136184..1365 | -      | 135            | -         | CCNA_00126 | 3.818655622                          |
| 136811..1370 | +      | 66             | -         | CCNA_00127 | 3.817830303                          |
| 214320..2153 | -      | 346            | -         | CCNA_00200 | 3.359778307                          |
| 215418..2160 | +      | 226            | -         | CCNA_00201 | 5.000545318                          |
| 278017..2794 | +      | 484            | -         | CCNA_00265 | 2.763931065                          |
| 280931..2818 | -      | 313            | -         | CCNA_00267 | 2.922458321                          |
| 282085..2839 | +      | 623            | -         | CCNA_00268 | 2.856366783                          |
| 292311..2929 | +      | 196            | -         | CCNA_00279 | 7.146539554                          |
| 304469..3058 | +      | 471            | phoR      | CCNA_00291 | 3.149949226                          |
| 335240..3357 | -      | 171            | rplU      | CCNA_00321 | 3.004891174                          |
| 335959..3365 | +      | 209            | -         | CCNA_00322 | 3.005947583                          |
| 337932..3383 | -      | 152            | -         | CCNA_00324 | 2.542811622                          |
| 338634..3396 | +      | 343            | -         | CCNA_00326 | 2.199611005                          |
| 405104..4059 | -      | 281            | -         | CCNA_00389 | 3.095610229                          |
| 405999..4072 | +      | 404            | -         | CCNA_00390 | 2.973925209                          |
| 454858..4553 | +      | 156            | cheE      | CCNA_00450 | 2.252530454                          |
| 477514..4776 | +      | 54             | -         | CCNA_00464 | 3.532567074                          |
| 477921..4790 | +      | 370            | -         | CCNA_00465 | 2.497848247                          |
| 519729..5201 | -      | 154            | -         | CCNA_00504 | 2.801202467                          |
| 520398..5209 | +      | 183            | -         | CCNA_00505 | 2.735936247                          |
| 567006..5680 | +      | 348            | -         | CCNA_00550 | 2.144809829                          |
| 568260..5687 | -      | 146            | -         | CCNA_00551 | 4.818380927                          |
| 631886..6348 | -      | 976            | -         | CCNA_00598 | 3.027570938                          |
| 721949..7230 | +      | 381            | -         | CCNA_00665 | 5.890239105                          |
| 735544..7364 | +      | 311            | -         | CCNA_00679 | 2.404752274                          |
| 756955..7572 | -      | 113            | -         | CCNA_00697 | 8.416903437                          |
| 812595..8133 | -      | 241            | -         | CCNA_00754 | 4.665564877                          |
| 852873..8535 | -      | 216            | fixK      | CCNA_00789 | 9.071546398                          |
| 853690..8540 | +      | 128            | fixT      | CCNA_00790 | 8.373260573                          |
| 856299..8576 | +      | 455            | -         | CCNA_00793 | 2.52363121                           |
| 859581..8610 | -      | 504            | fixL      | CCNA_00796 | 4.97387101                           |
| 863065..8647 | -      | 546            | cydD      | CCNA_00799 | 7.060937476                          |
| 864829..8663 | +      | 520            | cydA      | CCNA_00800 | 7.336858095                          |
| 917301..9203 | -      | 1029           | -         | CCNA_00846 | 2.273724643                          |
| 920836..9213 | +      | 155            | -         | CCNA_00847 | 5.097800898                          |
| 928249..9290 | -      | 260            | -         | CCNA_00853 | 4.266572702                          |
| 929146..9307 | +      | 530            | -         | CCNA_00854 | 4.228641045                          |
| 938619..9388 | -      | 78             | -         | CCNA_00860 | 2.701338878                          |
| 944663..9458 | -      | 384            | xylX      | CCNA_00866 | 2.37045202                           |
| 946004..9464 | +      | 162            | -         | CCNA_00867 | 2.386232118                          |
| 998598..1001 | +      | 859            | clpB      | CCNA_00922 | 2.419839104                          |
| 1055002..105 | -      | 594            | sppA      | CCNA_00976 | 2.50758701                           |
| 1057369..105 | +      | 136            | -         | CCNA_00977 | 4.587555734                          |

|              |   |           |            |             |
|--------------|---|-----------|------------|-------------|
| 1081948..108 | + | 177 -     | CCNA_00999 | 3.226472796 |
| 1157551..115 | - | 498 -     | CCNA_01057 | 2.988615885 |
| 1159130..115 | - | 99 -      | CCNA_01058 | 2.224007432 |
| 1212651..121 | - | 286 -     | CCNA_01108 | 3.044308406 |
| 1213981..121 | + | 596 -     | CCNA_01109 | 4.175127367 |
| 1272589..128 | + | 2479 -    | CCNA_01163 | 4.904841337 |
| 1301278..130 | - | 174 -     | CCNA_01181 | 2.366061323 |
| 1301993..130 | + | 197 -     | CCNA_01182 | 2.375635023 |
| 1347735..134 | - | 86 -      | CCNA_01221 | 2.598471129 |
| 1422154..142 | - | 278 -     | CCNA_01297 | 2.715072185 |
| 1534788..153 | + | 408 -     | CCNA_01417 | 2.272899324 |
| 1574323..157 | - | 134 -     | CCNA_01466 | 5.724614106 |
| 1574712..157 | + | 548 ccoN  | CCNA_01467 | 9.7651114   |
| 1583425..158 | + | 255 ftrB  | CCNA_01476 | 4.530707767 |
| 1627539..162 | - | 198 -     | CCNA_04008 | 2.421192627 |
| 1631535..163 | - | 196 flmH  | CCNA_01523 | 5.466256274 |
| 1632277..163 | - | 596 flbA  | CCNA_01524 | 2.428125306 |
| 1634266..163 | + | 141 flbT  | CCNA_01525 | 2.43188876  |
| 1639377..164 | + | 954 flaY  | CCNA_01532 | 3.968566549 |
| 1651185..165 | - | 756 -     | CCNA_01542 | 2.305647979 |
| 1670626..167 | - | 502 -     | CCNA_01555 | 2.339618105 |
| 1672295..167 | + | 357 -     | CCNA_01556 | 2.491740887 |
| 1755866..175 | + | 759 -     | CCNA_01637 | 3.140078412 |
| 1811466..181 | - | 294 phhA  | CCNA_01684 | 7.832544634 |
| 1812515..181 | - | 109 -     | CCNA_01685 | 2.264613123 |
| 1812889..181 | + | 407 -     | CCNA_01686 | 3.287051204 |
| 1894443..189 | - | 275 -     | CCNA_01766 | 2.337670353 |
| 1917887..191 | + | 550 pyrG  | CCNA_01791 | 3.420323702 |
| 1982720..198 | - | 353 qoxA  | CCNA_01851 | 4.445633894 |
| 1983992..198 | + | 446 -     | CCNA_01852 | 4.413512482 |
| 1985425..198 | + | 134 -     | CCNA_01853 | 2.497980298 |
| 2043376..204 | - | 329 -     | CCNA_01901 | 2.619533268 |
| 2107547..210 | - | 131 -     | CCNA_01964 | 3.87107988  |
| 2107942..210 | - | 40 -      | CCNA_01965 | 3.688849464 |
| 2108222..211 | + | 907 -     | CCNA_01966 | 3.961138679 |
| 2148907..215 | - | 1143 dnaE | CCNA_02003 | 3.32065819  |
| 2152629..215 | + | 319 -     | CCNA_02005 | 2.565293309 |
| 2177095..217 | - | 125 nuoA  | CCNA_02033 | 2.85884274  |
| 2186211..218 | - | 213 clpP  | CCNA_02041 | 2.554002946 |
| 2235387..223 | - | 266 -     | CCNA_02086 | 2.438161184 |
| 2244856..224 | - | 122 -     | CCNA_02096 | 2.434628819 |
| 2276272..227 | - | 974 podJ  | CCNA_02125 | 8.123783172 |
| 2279405..227 | + | 71 -      | CCNA_02126 | 8.041779485 |
| 2289247..229 | - | 331 glk   | CCNA_02133 | 2.246588158 |
| 2292773..229 | - | 487 zwf   | CCNA_02136 | 3.39467279  |
| 2316896..231 | - | 73 -      | CCNA_02162 | 2.516104302 |
| 2317218..231 | + | 286 -     | CCNA_02163 | 2.947019812 |
| 2349330..234 | - | 130 -     | CCNA_02200 | 5.552353543 |
| 2395180..239 | - | 278 -     | CCNA_02246 | 2.982937691 |
| 2396214..239 | + | 285 panC  | CCNA_02247 | 2.996274845 |
| 2435476..243 | - | 36 -      | CCNA_02286 | 3.511339872 |
| 2435736..243 | + | 215 -     | CCNA_02287 | 3.459905997 |
| 2445821..244 | + | 235 -     | CCNA_02299 | 3.33729662  |

|              |   |          |            |             |
|--------------|---|----------|------------|-------------|
| 2542088..254 | - | 418 -    | CCNA_02400 | 2.813978404 |
| 2543511..254 | + | 350 -    | CCNA_02401 | 2.700348496 |
| 2560136..256 | + | 92 -     | CCNA_02416 | 2.215622192 |
| 2570674..257 | - | 76 infA  | CCNA_02428 | 2.217404881 |
| 2577082..257 | - | 156 -    | CCNA_02436 | 3.184777685 |
| 2589111..258 | - | 223 -    | CCNA_02448 | 2.412840399 |
| 2589811..259 | + | 257 -    | CCNA_02449 | 2.995845679 |
| 2676573..267 | + | 218 -    | CCNA_02528 | 2.312613671 |
| 2727217..272 | - | 104 -    | CCNA_02575 | 4.125740283 |
| 2727918..272 | + | 252 -    | CCNA_02576 | 4.216030172 |
| 2749903..275 | - | 138 -    | CCNA_02604 | 2.319513337 |
| 2765344..276 | - | 378 -    | CCNA_02617 | 7.904446418 |
| 2771579..277 | - | 508 ftsZ | CCNA_02623 | 2.701933108 |
| 2867620..286 | + | 132 -    | CCNA_02706 | 2.288646409 |
| 2889287..288 | - | 176 -    | CCNA_02726 | 2.785158267 |
| 2936684..293 | + | 483 -    | CCNA_02779 | 2.367183757 |
| 2939969..294 | - | 161 -    | CCNA_02782 | 6.529201008 |
| 2940573..294 | + | 572 -    | CCNA_02783 | 6.891846138 |
| 2959801..296 | - | 196 -    | CCNA_02803 | 2.239919581 |
| 2960591..296 | + | 137 -    | CCNA_02805 | 2.239919581 |
| 3183958..318 | - | 245 -    | CCNA_03029 | 2.308520089 |
| 3184852..318 | + | 228 -    | CCNA_03030 | 2.338363621 |
| 3213796..321 | - | 370 -    | CCNA_03062 | 6.013640789 |
| 3239258..324 | - | 320 -    | CCNA_03090 | 4.324807205 |
| 3240500..324 | + | 66 -     | CCNA_03091 | 5.331531214 |
| 3240801..324 | + | 458 -    | CCNA_03092 | 8.444766204 |
| 3278952..327 | - | 231 ctrA | CCNA_03130 | 2.556544928 |
| 3375756..337 | - | 136 -    | CCNA_03214 | 5.109982606 |
| 3376165..337 | + | 471 -    | CCNA_03215 | 4.008511985 |
| 3487695..348 | + | 75 -     | CCNA_03312 | 2.454436473 |
| 3506186..350 | - | 108 -    | CCNA_03325 | 2.748018916 |
| 3506595..350 | + | 657 -    | CCNA_03326 | 2.153591223 |
| 3546725..354 | - | 159 -    | CCNA_03371 | 3.648144735 |
| 3573190..357 | - | 225 -    | CCNA_03405 | 4.046245566 |
| 3574019..357 | + | 87 rpsU  | CCNA_03406 | 4.246831074 |
| 3593983..359 | - | 41 rpmJ  | CCNA_03430 | 2.197267099 |
| 3594318..359 | + | 433 -    | CCNA_03431 | 2.166466198 |
| 3672702..367 | - | 339 coxE | CCNA_03516 | 5.104799603 |
| 3675514..367 | - | 331 coxB | CCNA_03518 | 7.520904213 |
| 3676818..367 | + | 108 -    | CCNA_03519 | 4.966245064 |
| 3749725..375 | - | 136 -    | CCNA_03597 | 2.357378968 |
| 3750296..375 | + | 769 -    | CCNA_03598 | 2.258868903 |
| 3762727..376 | - | 449 -    | CCNA_03609 | 4.788009191 |
| 3817495..381 | - | 307 -    | CCNA_03656 | 2.504681888 |
| 3854292..385 | - | 157 -    | CCNA_03688 | 6.735629774 |
| 3854885..385 | + | 370 -    | CCNA_03689 | 6.535143304 |
| 3859081..385 | - | 251 -    | CCNA_03693 | 3.342710712 |
| 3860040..386 | + | 314 -    | CCNA_03694 | 3.384042683 |
| 3881992..388 | - | 205 -    | CCNA_03717 | 2.937479126 |
| 3883021..388 | + | 319 -    | CCNA_03718 | 2.864983112 |
| 3901941..390 | - | 678 nadE | CCNA_03734 | 3.07418495  |
| 3904122..390 | + | 671 -    | CCNA_03735 | 3.170285084 |
| 3906574..390 | + | 123 -    | CCNA_03736 | 2.257251278 |

|              |   |          |            |             |
|--------------|---|----------|------------|-------------|
| 3974785..397 | - | 300 -    | CCNA_03811 | 3.315409162 |
| 3975911..397 | + | 183 -    | CCNA_03812 | 3.252222746 |
| 3976615..397 | + | 457 creS | CCNA_03813 | 3.63011977  |
| 3994545..399 | + | 396 -    | CCNA_03830 | 3.678351407 |
| 4023026..402 | + | 169 -    | CCNA_03860 | 2.74686347  |

| Start..end     | Strand | Product length | Gene code  | Z-score coverage<br>ChIP-seq GcrA in<br><i>ΔccrM</i> |
|----------------|--------|----------------|------------|------------------------------------------------------|
| 51..100        | +      | 301            | CCNA_00001 | 4.969991492                                          |
| 3201..3250     | +      | 237            | CCNA_00005 | 4.130647742                                          |
| 4851..4900     | +      | 96             | CCNA_00007 | 13.18856927                                          |
| 5401..5450     | +      | 490            | CCNA_00008 | 5.284745722                                          |
| 7951..8000     | -      | 206            | CCNA_00009 | 2.74922712                                           |
| 8001..8050     | +      | 631            | CCNA_00010 | 2.801685727                                          |
| 11401..11450   | +      | 903            | CCNA_00012 | 2.224636737                                          |
| 19751..19800   | -      | 349            | CCNA_00018 | 2.067260054                                          |
| 20751..20800   | -      | 74             | CCNA_00020 | 2.242123227                                          |
| 23701..23750   | -      | 176            | CCNA_00022 | 3.256331013                                          |
| 23651..23700   | +      | 156            | CCNA_00023 | 3.06398135                                           |
| 29751..29800   | -      | 900            | CCNA_00026 | 2.46944587                                           |
| 32801..32850   | -      | 851            | CCNA_00028 | 3.256331013                                          |
| 32701..32750   | +      | 210            | CCNA_00029 | 3.168899426                                          |
| 38701..38750   | -      | 89             | CCNA_00034 | 12.31425254                                          |
| 39951..40000   | -      | 149            | CCNA_00036 | 3.710975436                                          |
| 41901..41950   | -      | 172            | CCNA_00039 | 2.959063273                                          |
| 46001..46050   | -      | 1037           | CCNA_00041 | 3.221358033                                          |
| 48951..49000   | -      | 191            | CCNA_00044 | 8.20496365                                           |
| 49001..49050   | +      | 177            | CCNA_00045 | 6.246494038                                          |
| 52101..52150   | -      | 407            | CCNA_00048 | 2.801685727                                          |
| 58601..58650   | -      | 135            | CCNA_00055 | 3.62354385                                           |
| 64451..64500   | -      | 344            | CCNA_00062 | 2.032287074                                          |
| 71901..71950   | -      | 367            | CCNA_00069 | 2.679282023                                          |
| 71951..72000   | +      | 322            | CCNA_00070 | 2.224636737                                          |
| 83951..84000   | -      | 159            | CCNA_00079 | 11.43993581                                          |
| 84051..84100   | +      | 213            | CCNA_00080 | 10.74048225                                          |
| 85201..85250   | -      | 69             | CCNA_00081 | 2.556877457                                          |
| 96351..96400   | -      | 1607           | CCNA_00086 | 2.76671361                                           |
| 111601..111650 | -      | 226            | CCNA_00100 | 2.521904477                                          |
| 116051..116100 | +      | 232            | CCNA_00105 | 2.45195938                                           |
| 120051..120100 | -      | 299            | CCNA_00109 | 2.067260054                                          |
| 127801..127850 | -      | 448            | CCNA_00116 | 2.18966462                                           |
| 127851..127900 | +      | 606            | CCNA_00117 | 2.609336064                                          |
| 136651..136700 | -      | 135            | CCNA_00126 | 4.777641829                                          |
| 136701..136750 | +      | 66             | CCNA_00127 | 4.707696732                                          |
| 138451..138500 | -      | 408            | CCNA_00128 | 2.871631686                                          |
| 140951..141000 | -      | 665            | CCNA_00130 | 18.04977032                                          |
| 141001..141050 | +      | 140            | CCNA_00131 | 15.70660138                                          |
| 142601..142650 | +      | 404            | CCNA_00133 | 3.86835212                                           |
| 163251..163300 | -      | 86             | CCNA_00154 | 2.43447289                                           |
| 163301..163350 | +      | 372            | CCNA_00155 | 2.7842001                                            |
| 165451..165500 | +      | 387            | CCNA_00158 | 2.259609717                                          |
| 166601..166650 | +      | 821            | CCNA_00159 | 2.46944587                                           |
| 170751..170800 | +      | 208            | CCNA_00161 | 2.924090293                                          |
| 200151..200200 | -      | 841            | CCNA_00185 | 4.462887599                                          |
| 203751..203800 | -      | 334            | CCNA_00188 | 2.347041304                                          |
| 203801..203850 | +      | 88             | CCNA_00189 | 2.067260054                                          |
| 212151..212200 | -      | 245            | CCNA_00198 | 5.512068365                                          |

|                |   |                |             |
|----------------|---|----------------|-------------|
| 212051..212100 | + | 626 CCNA_00199 | 5.529553992 |
| 221501..221550 | + | 213 CCNA_00207 | 2.137205151 |
| 225001..225050 | + | 843 CCNA_00210 | 2.312068324 |
| 232551..232600 | + | 262 CCNA_00215 | 3.641030339 |
| 247951..248000 | - | 138 CCNA_00232 | 2.99403539  |
| 248001..248050 | + | 345 CCNA_00233 | 3.396221207 |
| 252351..252400 | - | 565 CCNA_00236 | 4.340483895 |
| 252401..252450 | + | 235 CCNA_00237 | 5.949226298 |
| 256951..257000 | + | 213 CCNA_00244 | 2.067260054 |
| 260901..260950 | - | 466 CCNA_00248 | 4.078188273 |
| 260951..261000 | + | 196 CCNA_00249 | 3.536112263 |
| 261601..261650 | + | 427 CCNA_00250 | 3.04649486  |
| 265801..265850 | - | 653 CCNA_00252 | 2.644309043 |
| 277751..277800 | - | 417 CCNA_00264 | 3.098953467 |
| 278001..278050 | + | 484 CCNA_00265 | 7.575455191 |
| 281951..282000 | - | 313 CCNA_00267 | 3.938298079 |
| 282001..282050 | + | 623 CCNA_00268 | 3.431194186 |
| 304351..304400 | + | 471 CCNA_00291 | 7.243215334 |
| 314501..314550 | - | 197 CCNA_00300 | 10.26835134 |
| 314651..314700 | + | 360 CCNA_00301 | 4.427915482 |
| 322901..322950 | - | 607 CCNA_00307 | 3.238844523 |
| 322951..323000 | + | 221 CCNA_00308 | 2.871631686 |
| 324101..324150 | - | 77 CCNA_00309  | 2.084746544 |
| 335801..335850 | - | 171 CCNA_00321 | 20.2530482  |
| 335851..335900 | + | 209 CCNA_00322 | 19.57108113 |
| 336701..336750 | + | 365 CCNA_00323 | 2.014801447 |
| 338401..338450 | - | 152 CCNA_00324 | 4.008243176 |
| 338451..338500 | - | 42 CCNA_00325  | 3.973270196 |
| 338601..338650 | + | 343 CCNA_00326 | 3.221358033 |
| 352351..352400 | + | 399 CCNA_00340 | 5.302232212 |
| 360251..360300 | - | 329 CCNA_00345 | 2.539390967 |
| 360201..360250 | + | 475 CCNA_00346 | 2.924090293 |
| 364251..364300 | - | 667 CCNA_00348 | 3.676002457 |
| 366001..366050 | - | 226 CCNA_00350 | 3.693488946 |
| 366051..366100 | + | 719 CCNA_00351 | 3.04649486  |
| 369251..369300 | + | 364 CCNA_00353 | 3.081467839 |
| 370401..370450 | + | 235 CCNA_00354 | 4.148134232 |
| 382701..382750 | - | 419 CCNA_00365 | 8.362340334 |
| 382951..383000 | + | 264 CCNA_00366 | 3.676002457 |
| 390051..390100 | - | 253 CCNA_00373 | 5.651958559 |
| 390251..390300 | - | 126 CCNA_00374 | 14.22026268 |
| 390601..390650 | + | 129 CCNA_00375 | 6.473816681 |
| 390701..390750 | + | 268 CCNA_00376 | 2.556877457 |
| 396801..396850 | - | 204 CCNA_00379 | 4.952505002 |
| 400751..400800 | - | 211 CCNA_00383 | 2.382014283 |
| 407801..407850 | + | 444 CCNA_00392 | 2.329554814 |
| 416801..416850 | + | 414 CCNA_00399 | 2.032287074 |
| 424351..424400 | - | 434 CCNA_00408 | 2.74922712  |
| 430301..430350 | - | 132 CCNA_00416 | 2.48693236  |
| 430551..430600 | - | 148 CCNA_00417 | 15.54922383 |
| 430501..430550 | + | 54 CCNA_00418  | 14.50004393 |
| 430651..430700 | + | 178 CCNA_00419 | 5.966712788 |
| 433151..433200 | - | 250 CCNA_00422 | 7.94266889  |

|                |   |                 |             |
|----------------|---|-----------------|-------------|
| 433251..433300 | + | 156 CCNA_00423  | 2.224636737 |
| 471451..471500 | + | 413 CCNA_00459  | 4.340483895 |
| 472851..472900 | + | 51 CCNA_00460   | 4.515347069 |
| 477401..477450 | + | 54 CCNA_00464   | 3.60605736  |
| 477601..477650 | + | 370 CCNA_00465  | 2.049773564 |
| 500301..500350 | - | 281 CCNA_00483  | 2.644309043 |
| 501051..501100 | - | 247 CCNA_00484  | 2.556877457 |
| 507751..507800 | - | 139 CCNA_00489  | 2.347041304 |
| 511851..511900 | + | 84 CCNA_00495   | 10.07600168 |
| 520201..520250 | - | 154 CCNA_00504  | 5.389663798 |
| 520051..520100 | + | 183 CCNA_00505  | 3.86835212  |
| 527201..527250 | - | 366 CCNA_00512  | 2.679282023 |
| 533801..533850 | - | 197 CCNA_00518  | 5.844308222 |
| 535001..535050 | - | 358 CCNA_00519  | 3.501139283 |
| 536201..536250 | - | 312 CCNA_00520  | 2.18966462  |
| 539651..539700 | - | 302 CCNA_00525  | 3.413707696 |
| 539701..539750 | + | 85 CCNA_00526   | 4.462887599 |
| 542301..542350 | + | 172 CCNA_00530  | 21.82681849 |
| 547451..547500 | + | 52 CCNA_00535   | 2.224636737 |
| 547551..547600 | + | 1356 CCNA_00536 | 4.288024426 |
| 562401..562450 | - | 216 CCNA_00543  | 2.46944587  |
| 562501..562550 | + | 391 CCNA_00544  | 2.73174063  |
| 564601..564650 | + | 260 CCNA_00546  | 3.501139283 |
| 575751..575800 | - | 382 CCNA_00559  | 2.45195938  |
| 575801..575850 | + | 170 CCNA_00560  | 2.18966462  |
| 581951..582000 | - | 580 CCNA_00565  | 5.249772742 |
| 628451..628500 | + | 1046 CCNA_00597 | 2.871631686 |
| 660001..660050 | - | 972 CCNA_00615  | 2.137205151 |
| 735101..735150 | - | 143 CCNA_00678  | 2.119718661 |
| 738051..738100 | - | 245 CCNA_00681  | 2.17217813  |
| 741751..741800 | - | 205 CCNA_00685  | 2.277096207 |
| 757201..757250 | - | 113 CCNA_00697  | 3.133926446 |
| 757951..758000 | - | 233 CCNA_00698  | 6.386385094 |
| 758051..758100 | + | 99 CCNA_00699   | 6.176548941 |
| 763351..763400 | - | 138 CCNA_00705  | 2.364527793 |
| 785001..785050 | + | 458 CCNA_00729  | 2.889118176 |
| 793101..793150 | - | 189 CCNA_00735  | 3.3437626   |
| 811301..811350 | - | 292 CCNA_00752  | 2.329554814 |
| 814151..814200 | - | 92 CCNA_00756   | 3.763434906 |
| 822951..823000 | - | 248 CCNA_00764  | 3.641030339 |
| 823051..823100 | + | 112 CCNA_00765  | 2.556877457 |
| 824551..824600 | - | 84 CCNA_00767   | 4.043216156 |
| 824651..824700 | + | 74 CCNA_00768   | 5.354690819 |
| 839751..839800 | - | 610 CCNA_00778  | 6.333925625 |
| 840101..840150 | + | 153 CCNA_00779  | 2.18966462  |
| 841701..841750 | - | 308 CCNA_00780  | 3.780920533 |
| 841751..841800 | + | 118 CCNA_00781  | 4.130647742 |
| 844151..844200 | - | 561 CCNA_00782  | 4.427915482 |
| 851401..851450 | - | 288 CCNA_00787  | 5.651958559 |
| 851451..851500 | + | 450 CCNA_00788  | 4.253052309 |
| 853551..853600 | - | 216 CCNA_00789  | 2.46944587  |
| 853601..853650 | + | 128 CCNA_00790  | 2.556877457 |
| 867651..867700 | + | 39 CCNA_00802   | 3.62354385  |

|                  |   |                 |             |
|------------------|---|-----------------|-------------|
| 867801..867850   | + | 172 CCNA_00803  | 5.267259232 |
| 871701..871750   | - | 615 CCNA_00806  | 2.032287074 |
| 872251..872300   | - | 44 CCNA_00808   | 2.661795533 |
| 915201..915250   | - | 574 CCNA_00842  | 2.242123227 |
| 920551..920600   | - | 1029 CCNA_00846 | 2.574363947 |
| 920751..920800   | + | 155 CCNA_00847  | 8.4847449   |
| 927551..927600   | + | 204 CCNA_00852  | 3.203871543 |
| 938801..938850   | - | 78 CCNA_00860   | 4.008243176 |
| 955001..955050   | - | 202 CCNA_00877  | 4.532833559 |
| 955101..955150   | + | 476 CCNA_00878  | 2.801685727 |
| 973901..973950   | + | 383 CCNA_00894  | 2.137205151 |
| 996201..996250   | + | 74 CCNA_00919   | 4.777641829 |
| 1005101..1005150 | - | 240 CCNA_00928  | 2.976549763 |
| 1014451..1014500 | + | 167 CCNA_00939  | 3.081467839 |
| 1050851..1050900 | - | 135 CCNA_00973  | 2.067260054 |
| 1057001..1057050 | - | 594 CCNA_00976  | 20.76015209 |
| 1057101..1057150 | + | 136 CCNA_00977  | 12.75141047 |
| 1081901..1081950 | + | 177 CCNA_00999  | 2.48693236  |
| 1132851..1132900 | - | 261 CCNA_01037  | 2.347041304 |
| 1139951..1140000 | - | 71 CCNA_01043   | 3.536112263 |
| 1140051..1140100 | + | 210 CCNA_01044  | 3.763434906 |
| 1141751..1141800 | - | 217 CCNA_01046  | 13.85304984 |
| 1142001..1142050 | + | 903 CCNA_01047  | 3.58857087  |
| 1159051..1159100 | - | 498 CCNA_01057  | 3.133926446 |
| 1159651..1159700 | - | 99 CCNA_01058   | 2.941576783 |
| 1159601..1159650 | + | 1073 CCNA_01059 | 2.854145197 |
| 1162901..1162950 | + | 578 CCNA_01060  | 5.267259232 |
| 1174251..1174300 | - | 429 CCNA_01068  | 2.48693236  |
| 1174201..1174250 | + | 554 CCNA_01069  | 2.102233033 |
| 1193051..1193100 | - | 602 CCNA_01086  | 5.162341156 |
| 1193201..1193250 | + | 221 CCNA_01087  | 4.113161253 |
| 1199251..1199300 | - | 98 CCNA_01093   | 4.795128319 |
| 1204001..1204050 | - | 66 CCNA_01098   | 8.344853844 |
| 1213601..1213650 | - | 286 CCNA_01108  | 6.246494038 |
| 1213751..1213800 | + | 596 CCNA_01109  | 4.183106349 |
| 1291701..1291750 | + | 112 CCNA_01171  | 8.100045574 |
| 1291851..1291900 | + | 280 CCNA_01172  | 2.679282023 |
| 1301801..1301850 | - | 174 CCNA_01181  | 3.151412936 |
| 1369201..1369250 | - | 546 CCNA_01242  | 3.518625773 |
| 1369251..1369300 | + | 823 CCNA_01243  | 3.710975436 |
| 1399951..1400000 | - | 153 CCNA_01273  | 2.294582697 |
| 1422951..1423000 | - | 278 CCNA_01297  | 18.50441474 |
| 1423251..1423300 | + | 396 CCNA_01298  | 2.7842001   |
| 1431051..1431100 | + | 110 CCNA_01304  | 17.90987926 |
| 1431101..1431150 | + | 102 CCNA_01305  | 20.8126107  |
| 1443251..1443300 | + | 122 CCNA_01328  | 8.904417206 |
| 1493151..1493200 | + | 488 CCNA_01379  | 2.242123227 |
| 1502251..1502300 | + | 266 CCNA_01385  | 2.644309043 |
| 1520951..1521000 | - | 88 CCNA_01402   | 3.081467839 |
| 1520901..1520950 | + | 299 CCNA_01403  | 3.168899426 |
| 1532801..1532850 | + | 265 CCNA_01415  | 2.014801447 |
| 1534701..1534750 | + | 408 CCNA_01417  | 2.661795533 |
| 1544951..1545000 | - | 160 CCNA_01427  | 4.078188273 |



|                  |   |                |             |
|------------------|---|----------------|-------------|
| 1544851..1544900 | + | 39 CCNA_01428  | 2.17217813  |
| 1545001..1545050 | + | 176 CCNA_01429 | 4.270537936 |
| 1549351..1549400 | + | 40 CCNA_01436  | 15.0421208  |
| 1552801..1552850 | + | 157 CCNA_01440 | 3.01152188  |
| 1557651..1557700 | - | 672 CCNA_01444 | 2.312068324 |
| 1560751..1560800 | + | 317 CCNA_01448 | 2.294582697 |
| 1564851..1564900 | + | 196 CCNA_01451 | 4.602778656 |
| 1566401..1566450 | + | 101 CCNA_01453 | 11.35250336 |
| 1571951..1572000 | - | 369 CCNA_01463 | 4.760155339 |
| 1631451..1631500 | - | 289 CCNA_01522 | 3.168899426 |
| 1639351..1639400 | + | 954 CCNA_01532 | 3.833380003 |
| 1646101..1646150 | + | 896 CCNA_01538 | 2.609336064 |
| 1654901..1654950 | - | 446 CCNA_01543 | 3.06398135  |
| 1658701..1658750 | - | 741 CCNA_01546 | 6.159062451 |
| 1665701..1665750 | + | 882 CCNA_01552 | 2.17217813  |
| 1694651..1694700 | + | 120 CCNA_01578 | 3.88583861  |
| 1733001..1733050 | + | 347 CCNA_01612 | 2.50441885  |
| 1741601..1741650 | + | 119 CCNA_01621 | 10.21589187 |
| 1765551..1765600 | - | 298 CCNA_01644 | 3.676002457 |
| 1765601..1765650 | + | 286 CCNA_01645 | 3.203871543 |
| 1781951..1782000 | - | 230 CCNA_01660 | 14.13283109 |
| 1782051..1782100 | + | 104 CCNA_01662 | 8.50223139  |
| 1797601..1797650 | + | 594 CCNA_01675 | 2.049773564 |
| 1812351..1812400 | - | 294 CCNA_01684 | 9.149225477 |
| 1815901..1815950 | + | 487 CCNA_01689 | 7.557969564 |
| 1845851..1845900 | + | 212 CCNA_01715 | 4.218079329 |
| 1850501..1850550 | + | 250 CCNA_01724 | 2.73174063  |
| 1866301..1866350 | - | 507 CCNA_01737 | 4.532833559 |
| 1870601..1870650 | - | 126 CCNA_01741 | 13.03119172 |
| 1870701..1870750 | + | 219 CCNA_01742 | 19.37873147 |
| 1877001..1877050 | + | 78 CCNA_01749  | 2.347041304 |
| 1887151..1887200 | - | 449 CCNA_01759 | 2.45195938  |
| 1891851..1891900 | - | 379 CCNA_01762 | 2.941576783 |
| 1898251..1898300 | + | 139 CCNA_01770 | 2.609336064 |
| 1917201..1917250 | - | 171 CCNA_01789 | 12.59403379 |
| 1917251..1917300 | + | 155 CCNA_01790 | 11.50988091 |
| 1917851..1917900 | + | 550 CCNA_01791 | 11.0202635  |
| 1919501..1919550 | + | 60 CCNA_01792  | 5.022450962 |
| 1923651..1923700 | + | 343 CCNA_01799 | 2.43447289  |
| 1934401..1934450 | - | 358 CCNA_01808 | 2.574363947 |
| 1934451..1934500 | + | 325 CCNA_01809 | 2.7842001   |
| 1941251..1941300 | + | 747 CCNA_01816 | 2.48693236  |
| 1945901..1945950 | + | 82 CCNA_01819  | 2.18966462  |
| 1950951..1951000 | - | 111 CCNA_01824 | 2.17217813  |
| 1951051..1951100 | + | 650 CCNA_01826 | 3.02900837  |
| 1985401..1985450 | + | 134 CCNA_01853 | 2.889118176 |
| 2044451..2044500 | - | 329 CCNA_01901 | 4.340483895 |
| 2072451..2072500 | - | 485 CCNA_01925 | 2.119718661 |
| 2072551..2072600 | + | 353 CCNA_01926 | 4.078188273 |
| 2085451..2085500 | - | 158 CCNA_01942 | 2.801685727 |
| 2088001..2088050 | - | 377 CCNA_01945 | 2.976549763 |
| 2090301..2090350 | + | 383 CCNA_01948 | 2.416986401 |
| 2093201..2093250 | - | 371 CCNA_01950 | 2.20715111  |

|                  |   |                |             |
|------------------|---|----------------|-------------|
| 2097101..2097150 | - | 395 CCNA_01952 | 2.959063273 |
| 2107951..2108000 | - | 131 CCNA_01964 | 4.357969523 |
| 2108101..2108150 | - | 40 CCNA_01965  | 6.019171395 |
| 2108151..2108200 | + | 907 CCNA_01966 | 4.707696732 |
| 2147251..2147300 | - | 268 CCNA_02000 | 17.7175296  |
| 2147301..2147350 | + | 216 CCNA_02001 | 14.6749071  |
| 2157001..2157050 | - | 443 CCNA_02008 | 2.014801447 |
| 2177601..2177650 | - | 125 CCNA_02033 | 12.92627364 |
| 2177701..2177750 | + | 337 CCNA_02034 | 4.935018513 |
| 2180501..2180550 | - | 402 CCNA_02035 | 2.277096207 |
| 2188551..2188600 | - | 454 CCNA_02042 | 3.571085242 |
| 2214551..2214600 | - | 309 CCNA_02063 | 2.626822554 |
| 2229851..2229900 | - | 482 CCNA_02078 | 3.378735579 |
| 2232601..2232650 | - | 200 CCNA_02081 | 2.18966462  |
| 2232751..2232800 | - | 74 CCNA_02082  | 4.865073416 |
| 2247501..2247550 | + | 298 CCNA_02098 | 3.676002457 |
| 2279251..2279300 | - | 974 CCNA_02125 | 3.29130313  |
| 2279301..2279350 | + | 71 CCNA_02126  | 3.378735579 |
| 2294201..2294250 | - | 487 CCNA_02136 | 7.260701824 |
| 2308501..2308550 | - | 84 CCNA_02151  | 2.539390967 |
| 2319201..2319250 | - | 353 CCNA_02164 | 2.73174063  |
| 2344451..2344500 | - | 205 CCNA_02193 | 2.539390967 |
| 2344501..2344550 | + | 463 CCNA_02194 | 2.609336064 |
| 2379601..2379650 | - | 555 CCNA_02231 | 2.18966462  |
| 2391651..2391700 | - | 144 CCNA_02242 | 4.690210242 |
| 2391751..2391800 | + | 451 CCNA_02243 | 5.651958559 |
| 2394601..2394650 | - | 425 CCNA_02244 | 2.277096207 |
| 2408951..2409000 | - | 489 CCNA_02256 | 5.477095385 |
| 2409051..2409100 | + | 241 CCNA_02258 | 2.836658707 |
| 2421901..2421950 | + | 330 CCNA_02269 | 6.386385094 |
| 2435601..2435650 | - | 36 CCNA_02286  | 6.771084421 |
| 2435651..2435700 | + | 215 CCNA_02287 | 5.774363125 |
| 2445851..2445900 | - | 343 CCNA_02298 | 2.102233033 |
| 2445801..2445850 | + | 235 CCNA_02299 | 2.644309043 |
| 2479751..2479800 | - | 298 CCNA_02339 | 2.591850436 |
| 2498001..2498050 | - | 498 CCNA_02357 | 2.46944587  |
| 2535001..2535050 | + | 259 CCNA_02391 | 8.624635957 |
| 2565801..2565850 | - | 302 CCNA_02421 | 3.431194186 |
| 2568901..2568950 | - | 57 CCNA_02425  | 3.920811589 |
| 2577101..2577150 | - | 429 CCNA_02435 | 3.518625773 |
| 2577601..2577650 | - | 156 CCNA_02436 | 16.14375931 |
| 2597451..2597500 | - | 207 CCNA_02455 | 4.847586926 |
| 2656401..2656450 | - | 46 CCNA_02506  | 3.483652793 |
| 2656501..2656550 | + | 501 CCNA_02507 | 6.491302308 |
| 2664851..2664900 | - | 512 CCNA_02513 | 3.466167166 |
| 2664901..2664950 | + | 246 CCNA_02514 | 2.836658707 |
| 2673451..2673500 | + | 332 CCNA_02525 | 3.133926446 |
| 2681151..2681200 | - | 60 CCNA_02534  | 3.221358033 |
| 2692201..2692250 | + | 55 CCNA_02543  | 14.60496201 |
| 2702201..2702250 | + | 120 CCNA_02554 | 6.893488125 |
| 2727651..2727700 | - | 104 CCNA_02575 | 8.79949913  |
| 2727701..2727750 | + | 252 CCNA_02576 | 6.771084421 |
| 2732251..2732300 | + | 48 CCNA_02582  | 2.312068324 |

|                  |   |                 |             |
|------------------|---|-----------------|-------------|
| 2732401..2732450 | + | 220 CCNA_02583  | 4.935018513 |
| 2747551..2747600 | - | 369 CCNA_02601  | 5.756876635 |
| 2747601..2747650 | + | 292 CCNA_02602  | 4.690210242 |
| 2775851..2775900 | - | 302 CCNA_02625  | 2.242123227 |
| 2830151..2830200 | - | 298 CCNA_02676  | 2.277096207 |
| 2859351..2859400 | + | 758 CCNA_02704  | 2.556877457 |
| 2868401..2868450 | - | 31 CCNA_02707   | 10.95031841 |
| 2868251..2868300 | + | 143 CCNA_02708  | 13.81807686 |
| 2870351..2870400 | + | 147 CCNA_02711  | 2.014801447 |
| 2879851..2879900 | + | 204 CCNA_02719  | 2.46944587  |
| 2895101..2895150 | - | 68 CCNA_02732   | 2.889118176 |
| 2897151..2897200 | - | 290 CCNA_02734  | 2.661795533 |
| 2910251..2910300 | + | 84 CCNA_02748   | 2.067260054 |
| 2934401..2934450 | - | 63 CCNA_02775   | 4.952505002 |
| 2940451..2940500 | - | 161 CCNA_02782  | 2.20715111  |
| 2940501..2940550 | + | 572 CCNA_02783  | 2.45195938  |
| 2960601..2960650 | + | 137 CCNA_02805  | 3.833380003 |
| 2974251..2974300 | - | 123 CCNA_02816  | 6.019171395 |
| 3069401..3069450 | - | 979 CCNA_02910  | 4.025729666 |
| 3086651..3086700 | - | 92 CCNA_02924   | 5.896767691 |
| 3086701..3086750 | + | 388 CCNA_02925  | 5.634472069 |
| 3101451..3101500 | + | 157 CCNA_02941  | 3.833380003 |
| 3119701..3119750 | + | 348 CCNA_02964  | 2.084746544 |
| 3150201..3150250 | - | 1099 CCNA_02994 | 5.809336105 |
| 3159551..3159600 | + | 377 CCNA_03006  | 15.95140965 |
| 3165101..3165150 | - | 169 CCNA_03011  | 3.466167166 |
| 3165251..3165300 | + | 187 CCNA_03012  | 6.893488125 |
| 3184601..3184650 | - | 245 CCNA_03029  | 6.019171395 |
| 3184751..3184800 | + | 228 CCNA_03030  | 6.928461104 |
| 3197801..3197850 | - | 297 CCNA_03041  | 2.801685727 |
| 3199501..3199550 | + | 183 CCNA_03045  | 2.259609717 |
| 3215001..3215050 | - | 370 CCNA_03062  | 4.672723753 |
| 3236051..3236100 | - | 184 CCNA_03086  | 2.067260054 |
| 3236001..3236050 | + | 186 CCNA_03087  | 2.329554814 |
| 3240251..3240300 | - | 320 CCNA_03090  | 3.88583861  |
| 3240551..3240600 | + | 66 CCNA_03091   | 3.641030339 |
| 3240701..3240750 | + | 458 CCNA_03092  | 12.26179307 |
| 3256451..3256500 | - | 216 CCNA_03105  | 4.148134232 |
| 3256501..3256550 | + | 97 CCNA_03106   | 4.532833559 |
| 3260951..3261000 | - | 1112 CCNA_03108 | 2.539390967 |
| 3261651..3261700 | - | 122 CCNA_03110  | 2.50441885  |
| 3261801..3261850 | - | 35 CCNA_03111   | 2.382014283 |
| 3264851..3264900 | + | 336 CCNA_03115  | 2.224636737 |
| 3268051..3268100 | + | 158 CCNA_03120  | 2.137205151 |
| 3279651..3279700 | - | 231 CCNA_03130  | 4.200592839 |
| 3282751..3282800 | + | 444 CCNA_03135  | 2.626822554 |
| 3286001..3286050 | + | 738 CCNA_03138  | 4.637751635 |
| 3294551..3294600 | - | 653 CCNA_03142  | 5.232286252 |
| 3298401..3298450 | - | 643 CCNA_03144  | 2.924090293 |
| 3298451..3298500 | + | 119 CCNA_03145  | 3.151412936 |
| 3316601..3316650 | - | 171 CCNA_03160  | 8.187477161 |
| 3316651..3316700 | + | 351 CCNA_03161  | 12.10441638 |
| 3320501..3320550 | - | 323 CCNA_03163  | 2.609336064 |

|                  |   |                 |             |
|------------------|---|-----------------|-------------|
| 3320551..3320600 | + | 923 CCNA_03164  | 3.098953467 |
| 3363151..3363200 | - | 428 CCNA_03201  | 3.081467839 |
| 3363751..3363800 | - | 208 CCNA_03202  | 2.609336064 |
| 3363801..3363850 | + | 325 CCNA_03203  | 2.539390967 |
| 3376201..3376250 | - | 136 CCNA_03214  | 7.995127497 |
| 3376101..3376150 | + | 471 CCNA_03215  | 4.392942503 |
| 3377951..3378000 | - | 82 CCNA_03216   | 3.62354385  |
| 3426751..3426800 | + | 372 CCNA_03256  | 3.536112263 |
| 3428401..3428450 | + | 180 CCNA_03257  | 2.854145197 |
| 3430101..3430150 | - | 121 CCNA_03260  | 2.871631686 |
| 3451001..3451050 | - | 1146 CCNA_03280 | 4.183106349 |
| 3450851..3450900 | + | 234 CCNA_03281  | 2.032287074 |
| 3466551..3466600 | + | 411 CCNA_03296  | 2.312068324 |
| 3484151..3484200 | - | 123 CCNA_03306  | 10.460701   |
| 3484101..3484150 | + | 88 CCNA_03307   | 5.547040482 |
| 3484301..3484350 | + | 289 CCNA_03308  | 19.48364955 |
| 3487451..3487500 | - | 105 CCNA_03311  | 6.106602982 |
| 3487551..3487600 | + | 75 CCNA_03312   | 15.09457941 |
| 3516501..3516550 | - | 626 CCNA_03334  | 2.347041304 |
| 3535951..3536000 | - | 127 CCNA_03357  | 6.403870722 |
| 3536001..3536050 | + | 335 CCNA_03358  | 8.065072594 |
| 3546051..3546100 | - | 201 CCNA_03369  | 2.312068324 |
| 3547401..3547450 | - | 159 CCNA_03371  | 3.221358033 |
| 3547551..3547600 | - | 61 CCNA_03372   | 7.365619038 |
| 3547601..3547650 | + | 214 CCNA_03373  | 7.872722931 |
| 3550601..3550650 | - | 151 CCNA_03377  | 4.847586926 |
| 3550701..3550750 | + | 305 CCNA_03378  | 6.736111441 |
| 3557101..3557150 | - | 617 CCNA_03383  | 11.36998985 |
| 3557201..3557250 | + | 76 CCNA_03384   | 10.5306461  |
| 3565451..3565500 | - | 192 CCNA_03393  | 3.501139283 |
| 3565301..3565350 | + | 237 CCNA_03394  | 3.186385054 |
| 3566401..3566450 | + | 119 CCNA_03395  | 5.651958559 |
| 3566551..3566600 | + | 574 CCNA_03396  | 2.679282023 |
| 3570001..3570050 | - | 205 CCNA_03399  | 3.186385054 |
| 3570101..3570150 | + | 70 CCNA_03400   | 2.73174063  |
| 3571151..3571200 | - | 237 CCNA_03401  | 5.966712788 |
| 3572401..3572450 | - | 324 CCNA_03402  | 2.294582697 |
| 3572351..3572400 | + | 68 CCNA_03403   | 2.014801447 |
| 3572451..3572500 | + | 169 CCNA_03404  | 2.18966462  |
| 3573901..3573950 | - | 225 CCNA_03405  | 8.4847449   |
| 3573951..3574000 | + | 87 CCNA_03406   | 7.540483074 |
| 3592401..3592450 | - | 190 CCNA_03426  | 3.973270196 |
| 3592451..3592500 | + | 155 CCNA_03427  | 6.176548941 |
| 3593301..3593350 | - | 89 CCNA_03428   | 3.86835212  |
| 3594001..3594050 | - | 205 CCNA_03429  | 11.49239442 |
| 3594151..3594200 | - | 41 CCNA_03430   | 19.29129988 |
| 3594201..3594250 | + | 433 CCNA_03431  | 14.91971624 |
| 3624601..3624650 | - | 139 CCNA_03461  | 2.74922712  |
| 3637601..3637650 | + | 319 CCNA_03471  | 4.270537936 |
| 3639701..3639750 | - | 75 CCNA_03474   | 3.01152188  |
| 3643201..3643250 | - | 148 CCNA_03479  | 2.014801447 |
| 3655051..3655100 | - | 265 CCNA_03495  | 2.119718661 |
| 3676601..3676650 | - | 331 CCNA_03518  | 5.407150288 |

|                  |   |                |             |
|------------------|---|----------------|-------------|
| 3676651..3676700 | + | 108 CCNA_03519 | 5.477095385 |
| 3692501..3692550 | - | 597 CCNA_03533 | 2.416986401 |
| 3692801..3692850 | + | 328 CCNA_03534 | 5.319718702 |
| 3702001..3702050 | + | 181 CCNA_03545 | 7.767804854 |
| 3702151..3702200 | + | 173 CCNA_03546 | 4.445401972 |
| 3708751..3708800 | + | 394 CCNA_03552 | 3.693488946 |
| 3713801..3713850 | - | 251 CCNA_03557 | 6.316439135 |
| 3719401..3719450 | - | 197 CCNA_03563 | 5.984199278 |
| 3720251..3720300 | - | 150 CCNA_03565 | 5.879281202 |
| 3720301..3720350 | + | 178 CCNA_03566 | 6.368898605 |
| 3720801..3720850 | + | 435 CCNA_03567 | 26.40823829 |
| 3730301..3730350 | - | 847 CCNA_03574 | 4.322997406 |
| 3730351..3730400 | + | 395 CCNA_03575 | 3.850866492 |
| 3737851..3737900 | - | 152 CCNA_03580 | 2.102233033 |
| 3740001..3740050 | - | 80 CCNA_03583  | 2.941576783 |
| 3739951..3740000 | + | 253 CCNA_03584 | 4.235565819 |
| 3747801..3747850 | - | 375 CCNA_03593 | 2.976549763 |
| 3747851..3747900 | + | 238 CCNA_03594 | 2.74922712  |
| 3750151..3750200 | - | 136 CCNA_03597 | 2.46944587  |
| 3750251..3750300 | + | 769 CCNA_03598 | 4.095674763 |
| 3752701..3752750 | + | 348 CCNA_03599 | 5.057423079 |
| 3754951..3755000 | + | 232 CCNA_03601 | 2.941576783 |
| 3764101..3764150 | - | 449 CCNA_03609 | 11.35250336 |
| 3777451..3777500 | - | 321 CCNA_03621 | 2.382014283 |
| 3777501..3777550 | + | 120 CCNA_03622 | 2.014801447 |
| 3790701..3790750 | - | 341 CCNA_03636 | 3.116439957 |
| 3790751..3790800 | + | 509 CCNA_03637 | 2.45195938  |
| 3798301..3798350 | - | 76 CCNA_03638  | 11.30004475 |
| 3803651..3803700 | - | 135 CCNA_03644 | 3.431194186 |
| 3818451..3818500 | - | 307 CCNA_03656 | 3.536112263 |
| 3820501..3820550 | - | 410 CCNA_03658 | 2.45195938  |
| 3824801..3824850 | - | 766 CCNA_03663 | 2.014801447 |
| 3824851..3824900 | + | 268 CCNA_03664 | 2.049773564 |
| 3834151..3834200 | - | 114 CCNA_03674 | 2.294582697 |
| 3834201..3834250 | + | 612 CCNA_03675 | 3.58857087  |
| 3843901..3843950 | + | 226 CCNA_03682 | 2.801685727 |
| 3854551..3854600 | - | 293 CCNA_03687 | 3.571085242 |
| 3854751..3854800 | - | 157 CCNA_03688 | 9.726274467 |
| 3854851..3854900 | + | 370 CCNA_03689 | 14.79731167 |
| 3859901..3859950 | - | 251 CCNA_03693 | 3.30878962  |
| 3860001..3860050 | + | 314 CCNA_03694 | 6.386385094 |
| 3869101..3869150 | - | 139 CCNA_03700 | 2.032287074 |
| 3871551..3871600 | - | 569 CCNA_03702 | 10.5306461  |
| 3873751..3873800 | - | 443 CCNA_03704 | 3.850866492 |
| 3873701..3873750 | + | 188 CCNA_03705 | 4.952505002 |
| 3874351..3874400 | + | 142 CCNA_03706 | 9.516438313 |
| 3879851..3879900 | - | 497 CCNA_03713 | 2.084746544 |
| 3881501..3881550 | - | 186 CCNA_03715 | 2.20715111  |
| 3882751..3882800 | - | 205 CCNA_03717 | 8.659608074 |
| 3882851..3882900 | + | 319 CCNA_03718 | 15.1120659  |
| 3904001..3904050 | - | 678 CCNA_03734 | 7.488023604 |
| 3904051..3904100 | + | 671 CCNA_03735 | 5.214800625 |
| 3906501..3906550 | + | 123 CCNA_03736 | 9.35906163  |

|                  |   |                |             |
|------------------|---|----------------|-------------|
| 3906651..3906700 | + | 98 CCNA_03737  | 3.256331013 |
| 3910601..3910650 | - | 328 CCNA_03740 | 2.329554814 |
| 3915601..3915650 | - | 280 CCNA_03745 | 3.151412936 |
| 3915801..3915850 | + | 391 CCNA_03746 | 3.536112263 |
| 3924401..3924450 | - | 232 CCNA_03754 | 4.602778656 |
| 3931401..3931450 | + | 32 CCNA_03762  | 5.197314135 |
| 3932751..3932800 | + | 284 CCNA_03764 | 2.539390967 |
| 3937051..3937100 | - | 508 CCNA_03768 | 2.889118176 |
| 3938851..3938900 | - | 320 CCNA_03770 | 3.676002457 |
| 3938901..3938950 | + | 348 CCNA_03771 | 3.01152188  |
| 3944501..3944550 | - | 350 CCNA_03777 | 3.30878962  |
| 3944601..3944650 | + | 250 CCNA_03778 | 2.626822554 |
| 3945951..3946000 | - | 110 CCNA_03779 | 5.074909569 |
| 3947151..3947200 | - | 247 CCNA_03780 | 2.48693236  |
| 3950001..3950050 | - | 895 CCNA_03781 | 2.71425414  |
| 3950151..3950200 | + | 204 CCNA_03782 | 2.696768513 |
| 3955251..3955300 | + | 91 CCNA_03790  | 2.609336064 |
| 3957801..3957850 | - | 313 CCNA_03793 | 4.777641829 |
| 3957851..3957900 | + | 229 CCNA_03794 | 4.900046395 |
| 3975751..3975800 | - | 300 CCNA_03811 | 7.575455191 |
| 3975801..3975850 | + | 183 CCNA_03812 | 5.407150288 |
| 3976551..3976600 | + | 457 CCNA_03813 | 2.871631686 |
| 3987301..3987350 | + | 268 CCNA_03821 | 3.378735579 |
| 3993701..3993750 | + | 155 CCNA_03828 | 2.941576783 |
| 3994601..3994650 | - | 139 CCNA_03829 | 13.0661647  |
| 3994551..3994600 | + | 396 CCNA_03830 | 11.94703884 |
| 3998751..3998800 | - | 278 CCNA_03833 | 2.976549763 |
| 4002451..4002500 | - | 170 CCNA_03836 | 3.396221207 |
| 4009651..4009700 | - | 256 CCNA_03842 | 2.416986401 |
| 4014851..4014900 | - | 309 CCNA_03848 | 3.203871543 |
| 4014801..4014850 | + | 365 CCNA_03849 | 2.224636737 |
| 4021251..4021300 | - | 395 CCNA_03856 | 2.084746544 |
| 4021651..4021700 | - | 234 CCNA_03857 | 3.431194186 |
| 4021701..4021750 | + | 163 CCNA_03858 | 2.137205151 |
| 4022851..4022900 | - | 232 CCNA_03859 | 3.116439957 |
| 4022801..4022850 | + | 169 CCNA_03860 | 4.025729666 |
| 4025251..4025300 | - | 150 CCNA_03863 | 6.351412115 |
| 4025301..4025350 | + | 234 CCNA_03864 | 5.092396059 |
| 475151..475200   | + | 413 CCNA_04006 | 4.008243176 |
| 2456951..2457000 | + | 112 CCNA_04009 | 3.168899426 |
| 3637551..3637600 | - | 240 CCNA_04011 | 4.183106349 |

| <b>Start..end</b> | <b>Strand</b> | <b>Product length</b> | <b>Gene code</b> | <b>Z-score coverage ChIP-seq m6A wt</b> |
|-------------------|---------------|-----------------------|------------------|-----------------------------------------|
| 51..100           | +             | 301                   | CCNA_00001       | 4.8827815                               |
| 3101..3150        | +             | 237                   | CCNA_00005       | 2.67743515                              |
| 3951..4000        | +             | 262                   | CCNA_00006       | 2.15720025                              |
| 4801..4850        | +             | 96                    | CCNA_00007       | 2.89231536                              |
| 5401..5450        | +             | 490                   | CCNA_00008       | 2.63219791                              |
| 7901..7950        | -             | 206                   | CCNA_00009       | 3.68397778                              |
| 10051..10100      | +             | 385                   | CCNA_00011       | 2.55303146                              |
| 19051..19100      | -             | 79                    | CCNA_00017       | 2.81314891                              |
| 20701..20750      | -             | 74                    | CCNA_00020       | 4.26075999                              |
| 26851..26900      | -             | 550                   | CCNA_00025       | 2.14589017                              |
| 30151..30200      | -             | 229                   | CCNA_00027       | 2.68874523                              |
| 32901..32950      | +             | 210                   | CCNA_00029       | 2.39469856                              |
| 33551..33600      | +             | 244                   | CCNA_00030       | 2.5077932                               |
| 34751..34800      | -             | 128                   | CCNA_00031       | 4.35123652                              |
| 34901..34950      | -             | 80                    | CCNA_00032       | 2.0101764                               |
| 45751..45800      | -             | 1037                  | CCNA_00041       | 2.3494603                               |
| 48301..48350      | -             | 548                   | CCNA_00043       | 2.10065293                              |
| 49051..49100      | +             | 177                   | CCNA_00045       | 3.86492878                              |
| 52151..52200      | -             | 407                   | CCNA_00048       | 3.26552744                              |
| 52651..52700      | -             | 144                   | CCNA_00049       | 2.15720025                              |
| 55851..55900      | -             | 157                   | CCNA_00052       | 2.49648415                              |
| 58351..58400      | -             | 448                   | CCNA_00054       | 2.1685093                               |
| 58551..58600      | -             | 135                   | CCNA_00055       | 4.38516471                              |
| 60001..60050      | -             | 211                   | CCNA_00057       | 2.33815125                              |
| 73601..73650      | +             | 304                   | CCNA_00072       | 2.4173177                               |
| 74401..74450      | +             | 511                   | CCNA_00073       | 2.47386501                              |
| 78651..78700      | -             | 733                   | CCNA_00074       | 2.80183986                              |
| 81851..81900      | -             | 391                   | CCNA_00077       | 4.55480666                              |
| 85101..85150      | -             | 69                    | CCNA_00081       | 4.50956839                              |
| 87101..87150      | -             | 552                   | CCNA_00082       | 2.48517406                              |
| 97851..97900      | +             | 516                   | CCNA_00088       | 2.23636567                              |
| 104201..1042      | -             | 297                   | CCNA_00091       | 3.67266873                              |
| 105301..1053      | -             | 69                    | CCNA_00093       | 2.74529254                              |
| 106201..1062      | -             | 306                   | CCNA_00094       | 2.72267341                              |
| 115951..1160      | -             | 233                   | CCNA_00104       | 2.88100528                              |
| 118451..1185      | -             | 65                    | CCNA_00107       | 3.9214761                               |
| 131701..1317      | +             | 153                   | CCNA_00119       | 5.82146674                              |
| 135401..1354      | -             | 218                   | CCNA_00124       | 3.67266873                              |
| 141501..1415      | +             | 266                   | CCNA_00132       | 2.58695965                              |
| 148851..1489      | -             | 514                   | CCNA_00137       | 2.10065293                              |
| 148701..1487      | +             | 730                   | CCNA_00138       | 3.29945562                              |
| 155751..1558      | -             | 290                   | CCNA_00143       | 4.8827815                               |
| 156901..1569      | -             | 384                   | CCNA_00144       | 2.1685093                               |
| 157801..1578      | -             | 200                   | CCNA_00145       | 3.01671904                              |
| 160301..1603      | -             | 325                   | CCNA_00150       | 4.86016237                              |
| 161401..1614      | -             | 238                   | CCNA_00151       | 2.20243748                              |
| 164951..1650      | +             | 123                   | CCNA_00157       | 2.0101764                               |
| 166701..1667      | +             | 821                   | CCNA_00159       | 3.88754791                              |
| 171351..1714      | +             | 422                   | CCNA_00162       | 2.33815125                              |

|              |   |                 |            |
|--------------|---|-----------------|------------|
| 172801..1728 | + | 739 CCNA_00163  | 2.12327104 |
| 175101..1751 | + | 641 CCNA_00164  | 2.31553212 |
| 192601..1926 | + | 324 CCNA_00179  | 3.05064722 |
| 195251..1953 | + | 238 CCNA_00182  | 2.47386501 |
| 197101..1971 | - | 253 CCNA_00183  | 3.4012412  |
| 199901..1999 | - | 841 CCNA_00185  | 3.3107657  |
| 204651..2047 | + | 158 CCNA_00191  | 2.37207943 |
| 208001..2080 | - | 350 CCNA_00193  | 2.11196198 |
| 215701..2157 | - | 346 CCNA_00200  | 2.96017173 |
| 215051..2151 | + | 226 CCNA_00201  | 2.20243748 |
| 215901..2159 | + | 351 CCNA_00202  | 3.87623886 |
| 217001..2170 | + | 347 CCNA_00203  | 3.60481133 |
| 225301..2253 | - | 524 CCNA_00209  | 8.42264431 |
| 228551..2286 | + | 292 CCNA_00212  | 2.98279086 |
| 233851..2339 | - | 130 CCNA_00216  | 3.44647844 |
| 233901..2339 | + | 716 CCNA_00217  | 2.56434051 |
| 247951..2480 | - | 138 CCNA_00232  | 2.37207943 |
| 248001..2480 | + | 345 CCNA_00233  | 2.58695965 |
| 253151..2532 | + | 534 CCNA_00238  | 2.86969623 |
| 256501..2565 | - | 51 CCNA_00242   | 2.97148181 |
| 256801..2568 | - | 158 CCNA_00243  | 2.31553212 |
| 257601..2576 | + | 94 CCNA_00245   | 3.15243281 |
| 259701..2597 | - | 185 CCNA_00247  | 2.27029488 |
| 260551..2606 | + | 196 CCNA_00249  | 2.02148649 |
| 266801..2668 | + | 300 CCNA_00254  | 3.36731302 |
| 273901..2739 | - | 236 CCNA_00260  | 2.85838718 |
| 273651..2737 | + | 347 CCNA_00261  | 2.36077038 |
| 281901..2819 | - | 313 CCNA_00267  | 8.49050068 |
| 282001..2820 | + | 623 CCNA_00268  | 2.42862675 |
| 286651..2867 | + | 173 CCNA_00273  | 2.2589848  |
| 289551..2896 | - | 481 CCNA_00275  | 2.22505662 |
| 294601..2946 | + | 110 CCNA_00282  | 2.55303146 |
| 296101..2961 | - | 286 CCNA_00283  | 3.37862207 |
| 296701..2967 | - | 221 CCNA_00284  | 3.79707242 |
| 299451..2995 | - | 368 CCNA_00287  | 3.86492878 |
| 304801..3048 | - | 1145 CCNA_00290 | 2.51910225 |
| 304401..3044 | + | 471 CCNA_00291  | 4.8149241  |
| 305651..3057 | + | 477 CCNA_00292  | 2.3494603  |
| 309351..3094 | + | 230 CCNA_00295  | 2.96017173 |
| 310351..3104 | + | 230 CCNA_00296  | 2.11196198 |
| 311801..3118 | - | 285 CCNA_00297  | 2.08934285 |
| 314601..3146 | + | 360 CCNA_00301  | 2.5982687  |
| 319551..3196 | - | 425 CCNA_00304  | 2.53041233 |
| 333101..3331 | + | 345 CCNA_00318  | 2.58695965 |
| 335001..3350 | - | 177 CCNA_00319  | 2.19112843 |
| 335151..3352 | - | 89 CCNA_00320   | 9.92680271 |
| 336101..3361 | - | 171 CCNA_00321  | 3.05064722 |
| 335951..3360 | + | 209 CCNA_00322  | 3.08457644 |
| 338501..3385 | - | 42 CCNA_00325   | 2.75660159 |
| 338551..3386 | + | 343 CCNA_00326  | 3.78576336 |
| 341301..3413 | + | 182 CCNA_00329  | 2.17981835 |
| 342601..3426 | - | 256 CCNA_00330  | 3.61612142 |
| 348201..3482 | + | 824 CCNA_00338  | 2.97148181 |



|              |   |                 |            |
|--------------|---|-----------------|------------|
| 352101..3521 | + | 399 CCNA_00340  | 2.98279086 |
| 357751..3578 | + | 402 CCNA_00343  | 2.08934285 |
| 360051..3601 | + | 475 CCNA_00346  | 2.46255493 |
| 361601..3616 | + | 59 CCNA_00347   | 2.36077038 |
| 366001..3660 | - | 226 CCNA_00350  | 3.59350228 |
| 366051..3661 | + | 719 CCNA_00351  | 2.1685093  |
| 373451..3735 | + | 475 CCNA_00357  | 4.50956839 |
| 378751..3788 | - | 315 CCNA_00361  | 2.72267341 |
| 383551..3836 | + | 341 CCNA_00367  | 3.94409523 |
| 385501..3855 | + | 437 CCNA_00369  | 5.65182479 |
| 388951..3890 | - | 74 CCNA_00372   | 3.69528683 |
| 390601..3906 | + | 129 CCNA_00375  | 3.20898012 |
| 396651..3967 | - | 204 CCNA_00379  | 3.84231068 |
| 399751..3998 | - | 358 CCNA_00382  | 5.74230029 |
| 400301..4003 | + | 301 CCNA_00384  | 3.11850462 |
| 401351..4014 | + | 444 CCNA_00385  | 2.60957878 |
| 403501..4035 | + | 164 CCNA_00387  | 2.4173177  |
| 405951..4060 | + | 404 CCNA_00390  | 3.3107657  |
| 407601..4076 | + | 444 CCNA_00392  | 2.77922073 |
| 413351..4134 | + | 512 CCNA_00397  | 2.08934285 |
| 416951..4170 | - | 449 CCNA_00398  | 4.14766536 |
| 416751..4168 | + | 414 CCNA_00399  | 3.25421839 |
| 422401..4224 | + | 163 CCNA_00407  | 2.68874523 |
| 424151..4242 | + | 47 CCNA_00409   | 2.04410562 |
| 425601..4256 | + | 216 CCNA_00412  | 2.66612609 |
| 426351..4264 | + | 417 CCNA_00413  | 2.90362441 |
| 429751..4298 | - | 336 CCNA_00415  | 3.41255025 |
| 436501..4365 | + | 114 CCNA_00426  | 4.35123652 |
| 445301..4453 | - | 124 CCNA_00438  | 6.95241306 |
| 445451..4455 | + | 673 CCNA_00439  | 8.33216778 |
| 447801..4478 | + | 121 CCNA_00441  | 3.03933817 |
| 451851..4519 | + | 344 CCNA_00445  | 4.09111805 |
| 452651..4527 | + | 129 CCNA_00446  | 2.02148649 |
| 453301..4533 | + | 187 CCNA_00447  | 2.60957878 |
| 453451..4535 | + | 127 CCNA_00448  | 5.13158887 |
| 455201..4552 | + | 1013 CCNA_00451 | 4.80361505 |
| 462101..4621 | - | 270 CCNA_00454  | 4.27207008 |
| 475351..4754 | + | 413 CCNA_04006  | 3.15243281 |
| 477401..4774 | + | 54 CCNA_00464   | 5.64051574 |
| 477601..4776 | + | 370 CCNA_00465  | 2.20243748 |
| 479251..4793 | + | 414 CCNA_00466  | 2.2589848  |
| 482001..4820 | - | 37 CCNA_00468   | 4.21552276 |
| 483951..4840 | - | 459 CCNA_00469  | 3.85361973 |
| 486101..4861 | - | 447 CCNA_00470  | 2.05541467 |
| 488351..4884 | - | 358 CCNA_00472  | 4.12504726 |
| 493301..4933 | - | 605 CCNA_00475  | 2.91493449 |
| 494451..4945 | - | 64 CCNA_00477   | 2.27029488 |
| 497001..4970 | + | 96 CCNA_00481   | 3.25421839 |
| 509851..5099 | - | 212 CCNA_00491  | 2.04410562 |
| 509651..5097 | + | 463 CCNA_00492  | 3.26552744 |
| 514051..5141 | + | 308 CCNA_00497  | 2.3268422  |
| 518401..5184 | - | 559 CCNA_00501  | 2.5982687  |
| 520501..5205 | - | 154 CCNA_00504  | 3.84231068 |

|              |   |                 |            |
|--------------|---|-----------------|------------|
| 520051..5201 | + | 183 CCNA_00505  | 2.67743515 |
| 520551..5206 | + | 426 CCNA_00506  | 3.15243281 |
| 522151..5222 | + | 281 CCNA_00507  | 2.67743515 |
| 535201..5352 | - | 358 CCNA_00519  | 3.59350228 |
| 536451..5365 | - | 83 CCNA_00521   | 2.88100528 |
| 540201..5402 | + | 168 CCNA_00527  | 3.14112376 |
| 542601..5426 | + | 172 CCNA_00530  | 5.154208   |
| 547551..5476 | + | 1356 CCNA_00536 | 2.70005428 |
| 561551..5616 | - | 107 CCNA_00542  | 3.38993112 |
| 565651..5657 | + | 82 CCNA_00547   | 4.9053996  |
| 565851..5659 | + | 88 CCNA_00548   | 4.22683181 |
| 567051..5671 | + | 348 CCNA_00550  | 2.3494603  |
| 568701..5687 | - | 146 CCNA_00551  | 2.93755259 |
| 569701..5697 | - | 156 CCNA_00552  | 3.52564489 |
| 570201..5702 | + | 268 CCNA_00554  | 3.25421839 |
| 571051..5711 | + | 114 CCNA_00555  | 2.13458112 |
| 582051..5821 | - | 580 CCNA_00565  | 4.05718986 |
| 586001..5860 | - | 770 CCNA_00567  | 2.90362441 |
| 588451..5885 | - | 358 CCNA_00569  | 3.50302678 |
| 589201..5892 | + | 878 CCNA_00571  | 2.45124588 |
| 613101..6131 | - | 455 CCNA_00583  | 3.08457644 |
| 612701..6127 | + | 141 CCNA_00584  | 2.42862675 |
| 612901..6129 | + | 351 CCNA_00585  | 3.34469389 |
| 615801..6158 | - | 443 CCNA_00586  | 3.20898012 |
| 627901..6279 | - | 329 CCNA_00595  | 5.94587042 |
| 647201..6472 | + | 348 CCNA_00609  | 4.12504726 |
| 648301..6483 | + | 867 CCNA_00610  | 3.45778852 |
| 655751..6558 | - | 447 CCNA_00613  | 3.06195731 |
| 660551..6606 | - | 162 CCNA_00616  | 2.4173177  |
| 664101..6641 | + | 392 CCNA_00620  | 2.51910225 |
| 670501..6705 | + | 125 CCNA_00625  | 2.12327104 |
| 673001..6730 | - | 637 CCNA_00626  | 3.38993112 |
| 675901..6759 | + | 764 CCNA_00630  | 2.75660159 |
| 678651..6787 | + | 150 CCNA_00631  | 2.55303146 |
| 678701..6787 | + | 122 CCNA_00632  | 3.28814657 |
| 692401..6924 | - | 91 CCNA_00640   | 4.23814189 |
| 692651..6927 | - | 98 CCNA_00641   | 2.97148181 |
| 692851..6929 | - | 85 CCNA_00642   | 3.36731302 |
| 698501..6985 | + | 240 CCNA_00648  | 2.33815125 |
| 704601..7046 | + | 892 CCNA_00653  | 2.49648415 |
| 710401..7104 | - | 660 CCNA_00655  | 2.53041233 |
| 722001..7220 | + | 381 CCNA_00665  | 4.74706774 |
| 722701..7227 | + | 117 CCNA_00666  | 2.13458112 |
| 729001..7290 | - | 250 CCNA_00670  | 3.43516939 |
| 735151..7352 | - | 143 CCNA_00678  | 3.02802912 |
| 741751..7418 | - | 205 CCNA_00685  | 3.01671904 |
| 745051..7451 | - | 436 CCNA_00688  | 2.29291298 |
| 757201..7572 | - | 113 CCNA_00697  | 3.77445328 |
| 758201..7582 | - | 233 CCNA_00698  | 3.14112376 |
| 757751..7578 | + | 99 CCNA_00699   | 3.68397778 |
| 762551..7626 | + | 65 CCNA_00704   | 3.00540999 |
| 771001..7710 | - | 89 CCNA_00714   | 3.52564489 |
| 771601..7716 | - | 66 CCNA_00716   | 3.86492878 |

|              |   |                |            |
|--------------|---|----------------|------------|
| 771301..7713 | + | 38 CCNA_00717  | 3.12981367 |
| 774051..7741 | + | 413 CCNA_00719 | 4.14766536 |
| 775251..7753 | + | 726 CCNA_00720 | 2.2589848  |
| 789551..7896 | - | 637 CCNA_00731 | 2.06672372 |
| 789401..7894 | + | 350 CCNA_00732 | 2.31553212 |
| 799951..8000 | - | 152 CCNA_00741 | 2.4173177  |
| 800901..8009 | + | 188 CCNA_00743 | 2.13458112 |
| 804901..8049 | - | 452 CCNA_00747 | 4.973257   |
| 804751..8048 | + | 107 CCNA_00748 | 4.03457073 |
| 805451..8055 | + | 631 CCNA_00749 | 2.47386501 |
| 818651..8187 | - | 824 CCNA_00759 | 2.67743515 |
| 820501..8205 | - | 566 CCNA_00760 | 4.74706774 |
| 824101..8241 | - | 192 CCNA_00766 | 6.95241306 |
| 838101..8381 | - | 842 CCNA_00777 | 2.24767575 |
| 839701..8397 | - | 610 CCNA_00778 | 4.30599826 |
| 846351..8464 | - | 658 CCNA_00783 | 2.23636567 |
| 846301..8463 | + | 407 CCNA_00784 | 3.35600294 |
| 850751..8508 | - | 108 CCNA_04003 | 4.73575766 |
| 853601..8536 | + | 128 CCNA_00790 | 2.31553212 |
| 856351..8564 | + | 455 CCNA_00793 | 3.06195731 |
| 859501..8595 | - | 202 CCNA_00795 | 5.57265835 |
| 867801..8678 | + | 172 CCNA_00803 | 2.3268422  |
| 870151..8702 | - | 229 CCNA_00805 | 2.77922073 |
| 875251..8753 | - | 380 CCNA_00810 | 4.14766536 |
| 884551..8846 | - | 130 CCNA_00822 | 5.41432648 |
| 899351..8994 | + | 273 CCNA_00834 | 3.29945562 |
| 902201..9022 | + | 273 CCNA_00836 | 2.54172138 |
| 915201..9152 | - | 574 CCNA_00842 | 2.03279554 |
| 941701..9417 | - | 591 CCNA_00862 | 2.06672372 |
| 954051..9541 | - | 57 CCNA_00875  | 2.63219791 |
| 955201..9552 | + | 476 CCNA_00878 | 2.31553212 |
| 964101..9641 | - | 128 CCNA_00884 | 2.11196198 |
| 964751..9648 | - | 182 CCNA_00885 | 2.27029488 |
| 965001..9650 | + | 415 CCNA_00886 | 2.0101764  |
| 967751..9678 | - | 158 CCNA_00889 | 3.93278618 |
| 975701..9757 | + | 54 CCNA_00897  | 2.63219791 |
| 978401..9784 | - | 356 CCNA_00899 | 3.69528683 |
| 978351..9784 | + | 735 CCNA_00900 | 2.70005428 |
| 981601..9816 | - | 278 CCNA_00901 | 2.72267341 |
| 982751..9828 | + | 515 CCNA_00903 | 3.25421839 |
| 993201..9932 | - | 58 CCNA_00913  | 2.5982687  |
| 996001..9960 | + | 74 CCNA_00919  | 3.00540999 |
| 998451..9985 | + | 859 CCNA_00922 | 2.0780338  |
| 1002601..100 | - | 180 CCNA_00925 | 2.5982687  |
| 1008601..100 | + | 474 CCNA_00933 | 2.06672372 |
| 1018301..101 | - | 410 CCNA_00941 | 2.20243748 |
| 1019351..101 | - | 307 CCNA_00942 | 3.02802912 |
| 1028601..102 | + | 340 CCNA_00951 | 6.13813151 |
| 1032501..103 | - | 44 CCNA_00955  | 3.27683649 |
| 1038851..103 | - | 148 CCNA_00962 | 2.83576804 |
| 1040901..104 | - | 232 CCNA_00965 | 2.76791064 |
| 1057301..105 | + | 136 CCNA_00977 | 8.35478691 |
| 1057501..105 | + | 122 CCNA_00978 | 2.67743515 |

|              |   |                 |            |
|--------------|---|-----------------|------------|
| 1064051..106 | - | 605 CCNA_00983  | 2.4173177  |
| 1072051..107 | - | 156 CCNA_00990  | 2.33815125 |
| 1072901..107 | - | 148 CCNA_00991  | 3.11850462 |
| 1081951..108 | + | 177 CCNA_00999  | 6.27384527 |
| 1085601..108 | + | 139 CCNA_01005  | 3.71790597 |
| 1085951..108 | + | 103 CCNA_01006  | 2.20243748 |
| 1087101..108 | - | 89 CCNA_01007   | 2.33815125 |
| 1093301..109 | + | 235 CCNA_01013  | 2.75660159 |
| 1112801..111 | - | 207 CCNA_01025  | 2.0780338  |
| 1121751..112 | + | 331 CCNA_01033  | 2.03279554 |
| 1132901..113 | - | 261 CCNA_01037  | 2.30422307 |
| 1136901..113 | - | 44 CCNA_01041   | 2.65481601 |
| 1146151..114 | + | 542 CCNA_01050  | 4.01195263 |
| 1147951..114 | + | 1035 CCNA_01051 | 2.5077932  |
| 1153401..115 | + | 499 CCNA_01054  | 4.24945094 |
| 1157551..115 | - | 453 CCNA_01056  | 3.5821922  |
| 1159751..115 | - | 99 CCNA_01058   | 4.13635631 |
| 1164801..116 | + | 436 CCNA_01061  | 2.27029488 |
| 1166251..116 | + | 325 CCNA_01062  | 2.49648415 |
| 1177251..117 | - | 249 CCNA_01070  | 5.2220654  |
| 1179001..117 | - | 51 CCNA_01072   | 3.23159925 |
| 1191251..119 | - | 335 CCNA_01085  | 2.03279554 |
| 1204051..120 | - | 66 CCNA_01098   | 2.21374757 |
| 1205551..120 | - | 396 CCNA_01099  | 2.56434051 |
| 1211101..121 | - | 390 CCNA_01104  | 4.19290363 |
| 1211151..121 | + | 290 CCNA_01105  | 4.43040297 |
| 1212151..121 | + | 89 CCNA_01106   | 3.52564489 |
| 1212301..121 | + | 72 CCNA_01107   | 4.83754324 |
| 1213701..121 | - | 286 CCNA_01108  | 3.4012412  |
| 1213951..121 | + | 596 CCNA_01109  | 6.5452728  |
| 1220351..122 | - | 263 CCNA_01115  | 2.93755259 |
| 1220401..122 | + | 600 CCNA_01116  | 2.63219791 |
| 1224751..122 | - | 97 CCNA_01120   | 2.90362441 |
| 1224501..122 | + | 504 CCNA_01121  | 5.88932311 |
| 1233451..123 | + | 88 CCNA_01129   | 3.10719454 |
| 1233851..123 | + | 251 CCNA_01130  | 2.23636567 |
| 1234151..123 | + | 361 CCNA_01131  | 3.62743047 |
| 1245301..124 | - | 547 CCNA_01140  | 3.27683649 |
| 1245101..124 | + | 356 CCNA_01141  | 2.53041233 |
| 1251201..125 | + | 58 CCNA_01148   | 2.77922073 |
| 1253751..125 | + | 231 CCNA_01150  | 3.3107657  |
| 1258501..125 | + | 1001 CCNA_01155 | 3.16374186 |
| 1266751..126 | + | 451 CCNA_01159  | 2.99409991 |
| 1269701..126 | + | 767 CCNA_01162  | 4.37385463 |
| 1272201..127 | + | 2479 CCNA_01163 | 2.46255493 |
| 1291601..129 | + | 112 CCNA_01171  | 4.05718986 |
| 1293701..129 | - | 121 CCNA_01173  | 3.26552744 |
| 1301551..130 | - | 725 CCNA_01180  | 2.38338951 |
| 1301851..130 | - | 174 CCNA_01181  | 4.31730731 |
| 1302001..130 | + | 197 CCNA_01182  | 5.30123082 |
| 1303551..130 | + | 148 CCNA_01184  | 2.23636567 |
| 1319101..131 | - | 341 CCNA_01195  | 2.62088783 |
| 1331801..133 | - | 315 CCNA_01204  | 6.02503687 |

|              |   |                |            |
|--------------|---|----------------|------------|
| 1331651..133 | + | 328 CCNA_01205 | 2.13458112 |
| 1336851..133 | + | 253 CCNA_01210 | 5.87801406 |
| 1339701..133 | - | 384 CCNA_01212 | 3.52564489 |
| 1342251..134 | - | 406 CCNA_01214 | 2.03279554 |
| 1343701..134 | - | 305 CCNA_01216 | 2.27029488 |
| 1343501..134 | + | 375 CCNA_01217 | 2.67743515 |
| 1344201..134 | + | 330 CCNA_01218 | 2.24767575 |
| 1347851..134 | - | 404 CCNA_01220 | 6.08158419 |
| 1347901..134 | - | 86 CCNA_01221  | 3.9214761  |
| 1352201..135 | - | 443 CCNA_01224 | 2.92624354 |
| 1369601..136 | - | 546 CCNA_01242 | 2.62088783 |
| 1376701..137 | + | 268 CCNA_01249 | 4.05718986 |
| 1381101..138 | + | 315 CCNA_01253 | 2.1685093  |
| 1382251..138 | + | 152 CCNA_01254 | 2.3268422  |
| 1386151..138 | - | 220 CCNA_01258 | 2.3494603  |
| 1388001..138 | + | 371 CCNA_01261 | 2.64350696 |
| 1395551..139 | - | 40 CCNA_01265  | 3.76314423 |
| 1405951..140 | - | 260 CCNA_01279 | 3.57088315 |
| 1410351..141 | + | 315 CCNA_01284 | 3.18636099 |
| 1412701..141 | - | 329 CCNA_01285 | 2.3494603  |
| 1412651..141 | + | 105 CCNA_01286 | 5.81015769 |
| 1413701..141 | + | 405 CCNA_01288 | 2.11196198 |
| 1418401..141 | + | 164 CCNA_01294 | 5.08635163 |
| 1423201..142 | - | 278 CCNA_01297 | 2.36077038 |
| 1423401..142 | + | 396 CCNA_01298 | 2.66612609 |
| 1431651..143 | + | 267 CCNA_01306 | 3.51433583 |
| 1434551..143 | + | 126 CCNA_01311 | 6.17205969 |
| 1434701..143 | + | 250 CCNA_01312 | 4.13635631 |
| 1435501..143 | + | 143 CCNA_01313 | 2.40600762 |
| 1436701..143 | + | 104 CCNA_01317 | 4.33992644 |
| 1437101..143 | + | 185 CCNA_01318 | 4.03457073 |
| 1441051..144 | + | 451 CCNA_01326 | 4.70182947 |
| 1442551..144 | + | 191 CCNA_01327 | 3.07326636 |
| 1443151..144 | + | 122 CCNA_01328 | 5.94587042 |
| 1444301..144 | + | 338 CCNA_01330 | 2.51910225 |
| 1448651..144 | - | 327 CCNA_01335 | 3.26552744 |
| 1451951..145 | + | 109 CCNA_01339 | 2.77922073 |
| 1454401..145 | + | 472 CCNA_01341 | 4.23814189 |
| 1455951..145 | + | 433 CCNA_01342 | 2.30422307 |
| 1456851..145 | + | 270 CCNA_01343 | 2.20243748 |
| 1457651..145 | + | 178 CCNA_01344 | 2.05541467 |
| 1462251..146 | + | 136 CCNA_01349 | 5.68575298 |
| 1462401..146 | + | 122 CCNA_01350 | 2.10065293 |
| 1466001..146 | - | 595 CCNA_01352 | 2.54172138 |
| 1485801..148 | + | 51 CCNA_01370  | 2.11196198 |
| 1492351..149 | - | 73 CCNA_01377  | 5.35777916 |
| 1492501..149 | + | 190 CCNA_01378 | 4.52087847 |
| 1500001..150 | + | 120 CCNA_01383 | 2.66612609 |
| 1505151..150 | + | 355 CCNA_01388 | 2.99409991 |
| 1506051..150 | + | 337 CCNA_01389 | 2.06672372 |
| 1516901..151 | + | 290 CCNA_01397 | 4.20421268 |
| 1529551..152 | - | 136 CCNA_04014 | 2.46255493 |
| 1529801..152 | + | 381 CCNA_01412 | 2.75660159 |

|              |   |                |            |
|--------------|---|----------------|------------|
| 1531151..153 | + | 199 CCNA_01413 | 2.72267341 |
| 1531401..153 | + | 350 CCNA_01414 | 2.65481601 |
| 1532451..153 | + | 265 CCNA_01415 | 2.55303146 |
| 1534601..153 | + | 408 CCNA_01417 | 2.03279554 |
| 1536651..153 | + | 428 CCNA_01419 | 2.94886267 |
| 1538701..153 | + | 149 CCNA_01422 | 4.45302108 |
| 1539401..153 | + | 352 CCNA_01423 | 2.20243748 |
| 1541451..154 | + | 712 CCNA_01425 | 5.00718518 |
| 1548401..154 | + | 100 CCNA_01433 | 3.61612142 |
| 1549801..154 | - | 56 CCNA_01435  | 2.90362441 |
| 1553901..155 | + | 317 CCNA_01442 | 2.5982687  |
| 1557901..155 | - | 672 CCNA_01444 | 3.51433583 |
| 1557301..155 | + | 198 CCNA_01445 | 4.82623419 |
| 1557951..155 | + | 406 CCNA_01446 | 3.14112376 |
| 1559401..155 | + | 429 CCNA_01447 | 4.27207008 |
| 1565051..156 | + | 196 CCNA_01451 | 3.67266873 |
| 1572701..157 | - | 130 CCNA_01464 | 2.81314891 |
| 1572551..157 | + | 531 CCNA_01465 | 3.42386034 |
| 1574701..157 | - | 134 CCNA_01466 | 3.51433583 |
| 1574651..157 | + | 548 CCNA_01467 | 2.10065293 |
| 1576751..157 | + | 55 CCNA_01469  | 2.5077932  |
| 1586301..158 | - | 248 CCNA_01478 | 2.49648415 |
| 1586051..158 | + | 687 CCNA_01479 | 2.79052978 |
| 1591201..159 | - | 101 CCNA_01482 | 3.96671436 |
| 1591151..159 | + | 139 CCNA_01484 | 4.56611571 |
| 1594051..159 | - | 336 CCNA_01486 | 2.11196198 |
| 1593801..159 | + | 248 CCNA_01487 | 4.05718986 |
| 1594401..159 | + | 600 CCNA_01488 | 2.21374757 |
| 1606001..160 | - | 483 CCNA_01495 | 2.22505662 |
| 1606101..160 | + | 287 CCNA_01496 | 3.45778852 |
| 1616351..161 | - | 698 CCNA_01504 | 3.28814657 |
| 1618401..161 | - | 219 CCNA_01507 | 2.11196198 |
| 1627551..162 | - | 342 CCNA_01517 | 3.02802912 |
| 1632051..163 | - | 196 CCNA_01523 | 2.67743515 |
| 1634101..163 | - | 596 CCNA_01524 | 5.39170735 |
| 1634151..163 | + | 141 CCNA_01525 | 3.66135865 |
| 1634651..163 | + | 120 CCNA_01526 | 3.29945562 |
| 1636301..163 | + | 273 CCNA_01528 | 2.64350696 |
| 1637851..163 | + | 278 CCNA_01530 | 3.76314423 |
| 1639351..163 | + | 954 CCNA_01532 | 8.32085873 |
| 1642751..164 | + | 132 CCNA_01534 | 2.58695965 |
| 1643601..164 | + | 167 CCNA_01535 | 2.54172138 |
| 1653451..165 | - | 756 CCNA_01542 | 8.00419397 |
| 1659401..165 | + | 569 CCNA_01547 | 2.33815125 |
| 1672001..167 | + | 357 CCNA_01556 | 2.90362441 |
| 1676901..167 | + | 909 CCNA_01560 | 3.02802912 |
| 1679601..167 | + | 127 CCNA_01561 | 2.36077038 |
| 1684701..168 | + | 481 CCNA_01568 | 2.53041233 |
| 1694451..169 | - | 272 CCNA_01577 | 2.33815125 |
| 1694301..169 | + | 120 CCNA_01578 | 2.64350696 |
| 1709251..170 | - | 378 CCNA_01589 | 4.13635631 |
| 1709351..170 | + | 783 CCNA_01590 | 3.26552744 |
| 1719101..171 | - | 811 CCNA_01596 | 2.39469856 |

|              |   |                |            |
|--------------|---|----------------|------------|
| 1719451..171 | - | 81 CCNA_01597  | 3.07326636 |
| 1719301..171 | + | 503 CCNA_01598 | 3.57088315 |
| 1722101..172 | + | 78 CCNA_01601  | 2.66612609 |
| 1724451..172 | - | 400 CCNA_01603 | 2.0780338  |
| 1726551..172 | - | 220 CCNA_01606 | 2.54172138 |
| 1734301..173 | + | 346 CCNA_01613 | 2.05541467 |
| 1751001..175 | - | 51 CCNA_01631  | 2.65481601 |
| 1755751..175 | + | 759 CCNA_01637 | 2.80183986 |
| 1761601..176 | + | 311 CCNA_01641 | 2.36077038 |
| 1768351..176 | + | 420 CCNA_01648 | 2.12327104 |
| 1771251..177 | + | 919 CCNA_01651 | 2.53041233 |
| 1781901..178 | - | 230 CCNA_01660 | 2.5982687  |
| 1782051..178 | + | 104 CCNA_01662 | 2.49648415 |
| 1786451..178 | + | 197 CCNA_01665 | 4.50956839 |
| 1786701..178 | + | 892 CCNA_01666 | 3.11850462 |
| 1789651..178 | + | 232 CCNA_01667 | 4.64528216 |
| 1795051..179 | - | 325 CCNA_01672 | 2.93755259 |
| 1797551..179 | - | 506 CCNA_01674 | 3.5821922  |
| 1803601..180 | + | 414 CCNA_01677 | 2.72267341 |
| 1805801..180 | + | 485 CCNA_01679 | 2.45124588 |
| 1812501..181 | - | 294 CCNA_01684 | 2.57565059 |
| 1813101..181 | - | 109 CCNA_01685 | 3.12981367 |
| 1812901..181 | + | 407 CCNA_01686 | 5.25599358 |
| 1813801..181 | + | 236 CCNA_01687 | 2.65481601 |
| 1815951..181 | + | 487 CCNA_01689 | 4.13635631 |
| 1819101..181 | + | 520 CCNA_01692 | 3.03933817 |
| 1840951..184 | - | 109 CCNA_01709 | 4.75837679 |
| 1844651..184 | - | 127 CCNA_01712 | 3.22028917 |
| 1844701..184 | + | 192 CCNA_01713 | 4.39647376 |
| 1845401..184 | + | 131 CCNA_01714 | 5.96848956 |
| 1850201..185 | + | 250 CCNA_01724 | 2.4173177  |
| 1851201..185 | + | 476 CCNA_01725 | 2.72267341 |
| 1856401..185 | - | 514 CCNA_01727 | 3.29945562 |
| 1858601..185 | - | 337 CCNA_01729 | 2.28160393 |
| 1859951..186 | - | 500 CCNA_01730 | 4.80361505 |
| 1863251..186 | - | 364 CCNA_01733 | 5.05242345 |
| 1864351..186 | + | 199 CCNA_01736 | 2.22505662 |
| 1873451..187 | - | 370 CCNA_01744 | 2.14589017 |
| 1874001..187 | - | 177 CCNA_01745 | 2.12327104 |
| 1877401..187 | + | 426 CCNA_01750 | 3.24290831 |
| 1878601..187 | + | 366 CCNA_01751 | 2.08934285 |
| 1881601..188 | - | 101 CCNA_01754 | 2.06672372 |
| 1889501..188 | - | 809 CCNA_01760 | 3.37862207 |
| 1895401..189 | - | 275 CCNA_01766 | 2.73398246 |
| 1901951..190 | + | 389 CCNA_01776 | 2.53041233 |
| 1907151..190 | - | 117 CCNA_01779 | 2.0780338  |
| 1911151..191 | - | 738 CCNA_01782 | 4.21552276 |
| 1912901..191 | - | 130 CCNA_01784 | 2.19112843 |
| 1928851..192 | + | 466 CCNA_01805 | 2.84707709 |
| 1930201..193 | + | 485 CCNA_01806 | 2.74529254 |
| 1933301..193 | - | 517 CCNA_01807 | 4.14766536 |
| 1937351..193 | + | 335 CCNA_01813 | 2.58695965 |
| 1941051..194 | + | 747 CCNA_01816 | 2.08934285 |

|              |   |                 |            |
|--------------|---|-----------------|------------|
| 1956701..195 | + | 953 CCNA_01830  | 3.35600294 |
| 1959501..195 | + | 507 CCNA_01831  | 2.29291298 |
| 1977901..197 | - | 177 CCNA_01845  | 2.49648415 |
| 1979601..197 | - | 245 CCNA_01847  | 3.14112376 |
| 1985351..198 | + | 134 CCNA_01853  | 3.41255025 |
| 1985701..198 | + | 221 CCNA_01854  | 3.25421839 |
| 1986801..198 | + | 238 CCNA_01855  | 2.57565059 |
| 1987151..198 | + | 732 CCNA_01856  | 2.12327104 |
| 1991601..199 | + | 677 CCNA_01859  | 3.25421839 |
| 1998651..199 | - | 478 CCNA_01863  | 3.54826402 |
| 1998701..199 | + | 207 CCNA_01864  | 2.89231536 |
| 1999301..199 | + | 362 CCNA_01865  | 3.17505194 |
| 2016001..201 | - | 556 CCNA_01876  | 2.28160393 |
| 2018201..201 | + | 367 CCNA_01879  | 3.22028917 |
| 2020551..202 | + | 212 CCNA_01881  | 2.39469856 |
| 2022101..202 | + | 390 CCNA_01883  | 2.65481601 |
| 2027901..202 | + | 42 CCNA_01887   | 3.08457644 |
| 2039801..203 | - | 68 CCNA_01896   | 6.7940812  |
| 2042751..204 | - | 336 CCNA_01899  | 3.42386034 |
| 2044551..204 | - | 329 CCNA_01901  | 2.24767575 |
| 2045401..204 | + | 279 CCNA_01903  | 2.53041233 |
| 2050551..205 | + | 594 CCNA_01906  | 2.47386501 |
| 2053401..205 | - | 253 CCNA_01907  | 2.5077932  |
| 2055801..205 | - | 39 CCNA_01910   | 2.4173177  |
| 2056101..205 | - | 123 CCNA_01911  | 6.51134462 |
| 2056251..205 | + | 126 CCNA_01913  | 4.13635631 |
| 2056901..205 | + | 302 CCNA_01914  | 2.51910225 |
| 2061201..206 | - | 375 CCNA_01917  | 4.10242813 |
| 2061251..206 | + | 441 CCNA_01918  | 3.45778852 |
| 2067401..206 | - | 97 CCNA_01921   | 3.17505194 |
| 2072351..207 | - | 485 CCNA_01925  | 2.70005428 |
| 2072251..207 | + | 353 CCNA_01926  | 3.52564489 |
| 2073601..207 | + | 267 CCNA_01927  | 2.88100528 |
| 2082401..208 | - | 129 CCNA_01939  | 5.21075532 |
| 2086751..208 | - | 172 CCNA_01944  | 3.43516939 |
| 2088001..208 | - | 377 CCNA_01945  | 3.4917167  |
| 2088201..208 | + | 441 CCNA_01946  | 2.97148181 |
| 2089551..208 | + | 153 CCNA_01947  | 2.27029488 |
| 2095801..209 | - | 789 CCNA_01951  | 2.80183986 |
| 2097101..209 | - | 395 CCNA_01952  | 2.10065293 |
| 2103401..210 | - | 269 CCNA_01957  | 2.02148649 |
| 2106101..210 | + | 217 CCNA_01962  | 2.79052978 |
| 2111401..211 | + | 289 CCNA_01968  | 4.63397311 |
| 2115601..211 | - | 253 CCNA_01970  | 3.7405251  |
| 2118951..211 | + | 198 CCNA_01974  | 2.46255493 |
| 2121751..212 | + | 196 CCNA_01977  | 2.20243748 |
| 2135651..213 | - | 159 CCNA_01989  | 2.05541467 |
| 2141201..214 | - | 425 CCNA_01993  | 2.4173177  |
| 2142251..214 | - | 399 CCNA_01994  | 3.07326636 |
| 2146201..214 | - | 312 CCNA_01999  | 2.84707709 |
| 2152351..215 | - | 1143 CCNA_02003 | 3.54826402 |
| 2152401..215 | - | 40 CCNA_02004   | 3.52564489 |
| 2157901..215 | - | 139 CCNA_02011  | 2.31553212 |



|              |   |                |            |
|--------------|---|----------------|------------|
| 2159751..215 | - | 559 CCNA_02012 | 3.4917167  |
| 2167351..216 | - | 217 CCNA_02019 | 3.06195731 |
| 2172751..217 | - | 439 CCNA_02024 | 3.00540999 |
| 2174601..217 | - | 110 CCNA_02028 | 2.21374757 |
| 2175901..217 | - | 131 CCNA_02030 | 3.26552744 |
| 2176551..217 | - | 197 CCNA_02031 | 2.27029488 |
| 2177451..217 | - | 125 CCNA_02033 | 2.24767575 |
| 2180101..218 | - | 402 CCNA_02035 | 4.32861739 |
| 2183151..218 | + | 110 CCNA_02038 | 2.42862675 |
| 2186851..218 | - | 213 CCNA_02041 | 2.22505662 |
| 2200201..220 | + | 695 CCNA_02052 | 2.57565059 |
| 2213451..221 | - | 568 CCNA_02062 | 3.02802912 |
| 2214451..221 | - | 309 CCNA_02063 | 2.77922073 |
| 2223201..222 | - | 103 CCNA_02071 | 2.5077932  |
| 2228401..222 | - | 263 CCNA_02077 | 2.10065293 |
| 2231851..223 | - | 300 CCNA_02080 | 2.76791064 |
| 2232551..223 | - | 200 CCNA_02081 | 3.61612142 |
| 2232701..223 | - | 74 CCNA_02082  | 4.09111805 |
| 2237901..223 | - | 394 CCNA_02087 | 2.12327104 |
| 2239151..223 | + | 309 CCNA_02091 | 2.28160393 |
| 2240701..224 | - | 212 CCNA_02092 | 2.54172138 |
| 2240501..224 | + | 619 CCNA_02093 | 2.4173177  |
| 2243601..224 | - | 305 CCNA_02094 | 3.70659692 |
| 2243801..224 | + | 341 CCNA_02095 | 2.56434051 |
| 2245101..224 | - | 122 CCNA_02096 | 3.26552744 |
| 2247651..224 | + | 298 CCNA_02098 | 2.58695965 |
| 2250201..225 | - | 471 CCNA_02099 | 2.11196198 |
| 2250601..225 | + | 128 CCNA_02101 | 3.01671904 |
| 2251001..225 | + | 347 CCNA_02102 | 4.39647376 |
| 2256951..225 | - | 73 CCNA_02107  | 5.26730263 |
| 2261051..226 | - | 142 CCNA_02110 | 2.03279554 |
| 2261351..226 | - | 184 CCNA_02111 | 4.27207008 |
| 2261501..226 | + | 333 CCNA_02112 | 3.88754791 |
| 2271101..227 | - | 330 CCNA_02120 | 2.64350696 |
| 2270901..227 | + | 859 CCNA_02121 | 2.53041233 |
| 2274601..227 | + | 164 CCNA_02123 | 3.19767107 |
| 2279251..227 | - | 974 CCNA_02125 | 6.28515535 |
| 2279301..227 | + | 71 CCNA_02126  | 6.96372314 |
| 2288151..228 | - | 821 CCNA_02131 | 2.03279554 |
| 2289101..228 | - | 339 CCNA_02132 | 5.48218285 |
| 2300101..230 | - | 374 CCNA_02140 | 4.30599826 |
| 2300601..230 | - | 205 CCNA_02141 | 6.36432077 |
| 2300651..230 | + | 245 CCNA_02142 | 4.06849994 |
| 2301201..230 | + | 262 CCNA_02143 | 2.43993683 |
| 2307551..230 | - | 640 CCNA_02149 | 2.76791064 |
| 2309551..230 | - | 219 CCNA_02152 | 2.46255493 |
| 2310101..231 | - | 306 CCNA_02153 | 2.66612609 |
| 2316351..231 | - | 169 CCNA_02160 | 3.75183415 |
| 2316201..231 | + | 222 CCNA_02161 | 6.10420332 |
| 2317301..231 | - | 73 CCNA_02162  | 3.84231068 |
| 2317251..231 | + | 286 CCNA_02163 | 2.79052978 |
| 2321251..232 | - | 194 CCNA_02166 | 2.94886267 |
| 2324851..232 | - | 426 CCNA_02171 | 2.13458112 |

|              |   |                |            |
|--------------|---|----------------|------------|
| 2332851..233 | - | 366 CCNA_02180 | 2.60957878 |
| 2334351..233 | - | 307 CCNA_02182 | 2.11196198 |
| 2336101..233 | + | 601 CCNA_02185 | 2.56434051 |
| 2338851..233 | + | 162 CCNA_02187 | 5.25599358 |
| 2339851..233 | + | 257 CCNA_02189 | 2.2589848  |
| 2343851..234 | - | 146 CCNA_02192 | 3.42386034 |
| 2344401..234 | - | 205 CCNA_02193 | 2.17981835 |
| 2346901..234 | - | 132 CCNA_02196 | 2.67743515 |
| 2349651..234 | - | 130 CCNA_02200 | 2.85838718 |
| 2350351..235 | - | 186 CCNA_02201 | 3.07326636 |
| 2350201..235 | + | 265 CCNA_02202 | 2.46255493 |
| 2354401..235 | - | 318 CCNA_02205 | 5.27861271 |
| 2354351..235 | + | 187 CCNA_02206 | 3.01671904 |
| 2354601..235 | + | 316 CCNA_02207 | 6.33039259 |
| 2359401..235 | + | 303 CCNA_02212 | 4.05718986 |
| 2364751..236 | - | 100 CCNA_02217 | 2.4173177  |
| 2396001..239 | - | 278 CCNA_02246 | 3.38993112 |
| 2397351..239 | - | 50 CCNA_02248  | 2.85838718 |
| 2400701..240 | - | 279 CCNA_02251 | 3.20898012 |
| 2409001..240 | - | 489 CCNA_02256 | 4.38516471 |
| 2409151..240 | + | 241 CCNA_02258 | 5.34646908 |
| 2423901..242 | - | 169 CCNA_02270 | 2.02148649 |
| 2424951..242 | - | 80 CCNA_02272  | 2.51910225 |
| 2425251..242 | - | 82 CCNA_02273  | 3.69528683 |
| 2425801..242 | - | 161 CCNA_02274 | 2.04410562 |
| 2430851..243 | + | 593 CCNA_02281 | 2.65481601 |
| 2434001..243 | - | 187 CCNA_02283 | 3.68397778 |
| 2435801..243 | + | 215 CCNA_02287 | 2.12327104 |
| 2444801..244 | - | 193 CCNA_02297 | 2.05541467 |
| 2446151..244 | - | 343 CCNA_02298 | 2.17981835 |
| 2447951..244 | + | 236 CCNA_02302 | 3.57088315 |
| 2449651..244 | - | 181 CCNA_02303 | 2.68874523 |
| 2450101..245 | + | 281 CCNA_02305 | 3.94409523 |
| 2454501..245 | + | 111 CCNA_02309 | 2.15720025 |
| 2461901..246 | - | 100 CCNA_02318 | 3.48040765 |
| 2463301..246 | + | 394 CCNA_02321 | 2.11196198 |
| 2466851..246 | - | 302 CCNA_02324 | 4.15897544 |
| 2467851..246 | - | 311 CCNA_02325 | 2.47386501 |
| 2470251..247 | - | 273 CCNA_02327 | 3.41255025 |
| 2475451..247 | - | 314 CCNA_02333 | 2.0101764  |
| 2478401..247 | - | 102 CCNA_02337 | 2.06672372 |
| 2482701..248 | - | 421 CCNA_02342 | 3.23159925 |
| 2484201..248 | - | 419 CCNA_02343 | 2.85838718 |
| 2485001..248 | + | 77 CCNA_02345  | 3.85361973 |
| 2485151..248 | + | 318 CCNA_02346 | 6.91848488 |
| 2488401..248 | + | 299 CCNA_02349 | 4.24945094 |
| 2496501..249 | - | 322 CCNA_02356 | 2.57565059 |
| 2501701..250 | - | 383 CCNA_02361 | 4.15897544 |
| 2502551..250 | - | 164 CCNA_02362 | 2.43993683 |
| 2502351..250 | + | 109 CCNA_02363 | 2.29291298 |
| 2519951..252 | - | 88 CCNA_02374  | 2.92624354 |
| 2523351..252 | - | 118 CCNA_02380 | 2.73398246 |
| 2530801..253 | - | 407 CCNA_02386 | 3.67266873 |

|              |   |                |            |
|--------------|---|----------------|------------|
| 2534201..253 | - | 462 CCNA_02389 | 6.33039259 |
| 2534251..253 | + | 237 CCNA_02390 | 4.37385463 |
| 2536401..253 | + | 145 CCNA_04015 | 4.63397311 |
| 2538201..253 | - | 220 CCNA_02394 | 3.20898012 |
| 2541151..254 | - | 331 CCNA_02398 | 4.27207008 |
| 2543451..254 | + | 350 CCNA_02401 | 2.55303146 |
| 2546201..254 | - | 559 CCNA_02402 | 3.01671904 |
| 2546151..254 | + | 371 CCNA_02403 | 4.91670969 |
| 2547351..254 | + | 278 CCNA_02404 | 2.48517406 |
| 2550651..255 | - | 254 CCNA_02407 | 2.85838718 |
| 2551851..255 | - | 377 CCNA_02408 | 2.58695965 |
| 2556001..255 | - | 288 CCNA_02411 | 5.25599358 |
| 2555851..255 | + | 240 CCNA_02412 | 4.82623419 |
| 2558151..255 | - | 387 CCNA_02413 | 2.38338951 |
| 2559551..255 | - | 338 CCNA_02414 | 2.39469856 |
| 2560101..256 | + | 92 CCNA_02416  | 2.28160393 |
| 2565101..256 | - | 144 CCNA_02420 | 2.3268422  |
| 2569301..256 | - | 57 CCNA_02425  | 4.01195263 |
| 2570301..257 | - | 353 CCNA_02426 | 2.92624354 |
| 2571101..257 | - | 76 CCNA_02428  | 3.66135865 |
| 2571351..257 | - | 152 CCNA_02429 | 3.43516939 |
| 2577101..257 | - | 429 CCNA_02435 | 3.26552744 |
| 2577551..257 | - | 156 CCNA_02436 | 2.22505662 |
| 2582301..258 | - | 346 CCNA_02440 | 3.76314423 |
| 2584601..258 | - | 500 CCNA_02442 | 2.06672372 |
| 2586401..258 | + | 245 CCNA_02445 | 3.45778852 |
| 2588501..258 | - | 387 CCNA_02446 | 3.37862207 |
| 2589101..258 | - | 252 CCNA_02447 | 3.57088315 |
| 2589551..258 | + | 257 CCNA_02449 | 6.4774154  |
| 2590601..259 | + | 143 CCNA_02450 | 3.4012412  |
| 2603901..260 | - | 153 CCNA_02460 | 2.99409991 |
| 2604001..260 | + | 105 CCNA_02462 | 3.24290831 |
| 2607601..260 | - | 435 CCNA_02464 | 2.5982687  |
| 2610151..261 | - | 435 CCNA_02465 | 5.38039726 |
| 2612001..261 | + | 198 CCNA_02469 | 2.02148649 |
| 2613251..261 | + | 421 CCNA_02471 | 4.06849994 |
| 2620751..262 | - | 244 CCNA_02475 | 3.88754791 |
| 2648351..264 | + | 104 CCNA_02499 | 2.42862675 |
| 2656151..265 | - | 46 CCNA_02506  | 3.02802912 |
| 2663401..266 | - | 233 CCNA_02512 | 2.96017173 |
| 2664851..266 | - | 512 CCNA_02513 | 2.48517406 |
| 2664701..266 | + | 246 CCNA_02514 | 2.54172138 |
| 2666651..266 | + | 197 CCNA_02517 | 2.03279554 |
| 2672301..267 | + | 164 CCNA_02523 | 2.64350696 |
| 2676451..267 | + | 218 CCNA_02528 | 2.3494603  |
| 2681301..268 | + | 899 CCNA_02535 | 2.39469856 |
| 2688051..268 | - | 340 CCNA_02538 | 2.10065293 |
| 2692001..269 | + | 55 CCNA_02543  | 2.92624354 |
| 2696151..269 | - | 454 CCNA_02546 | 3.45778852 |
| 2696351..269 | - | 125 CCNA_02547 | 2.11196198 |
| 2699701..269 | + | 776 CCNA_02553 | 5.42563553 |
| 2710751..271 | - | 533 CCNA_02562 | 2.66612609 |
| 2716601..271 | + | 842 CCNA_02567 | 7.26907886 |

|              |   |                |            |
|--------------|---|----------------|------------|
| 2721251..272 | + | 444 CCNA_02570 | 4.38516471 |
| 2724601..272 | + | 436 CCNA_02572 | 2.31553212 |
| 2727551..272 | - | 104 CCNA_02575 | 2.1685093  |
| 2727901..272 | + | 252 CCNA_02576 | 3.898858   |
| 2730801..273 | + | 59 CCNA_02580  | 3.44647844 |
| 2738151..273 | - | 637 CCNA_02587 | 2.74529254 |
| 2739151..273 | - | 309 CCNA_02588 | 3.03933817 |
| 2739401..273 | + | 78 CCNA_02589  | 4.13635631 |
| 2739451..273 | + | 296 CCNA_02590 | 4.40778384 |
| 2742451..274 | - | 125 CCNA_02593 | 4.03457073 |
| 2744451..274 | - | 205 CCNA_02596 | 2.11196198 |
| 2762851..276 | - | 335 CCNA_02614 | 2.06672372 |
| 2773201..277 | - | 508 CCNA_02623 | 3.34469389 |
| 2774951..277 | - | 441 CCNA_02624 | 5.68575298 |
| 2776051..277 | - | 302 CCNA_02625 | 2.1685093  |
| 2778301..277 | - | 467 CCNA_02627 | 3.63873952 |
| 2781801..278 | - | 57 CCNA_02631  | 3.41255025 |
| 2804551..280 | - | 242 CCNA_02650 | 2.58695965 |
| 2811501..281 | - | 265 CCNA_02658 | 2.02148649 |
| 2812451..281 | + | 935 CCNA_02661 | 2.48517406 |
| 2818601..281 | - | 144 CCNA_02664 | 3.85361973 |
| 2818651..281 | + | 370 CCNA_02665 | 2.47386501 |
| 2822601..282 | - | 426 CCNA_02669 | 3.46909757 |
| 2828401..282 | + | 137 CCNA_02674 | 3.32207475 |
| 2830051..283 | - | 298 CCNA_02676 | 5.66313384 |
| 2830001..283 | + | 204 CCNA_02677 | 3.06195731 |
| 2832601..283 | - | 250 CCNA_02679 | 3.9214761  |
| 2837301..283 | - | 454 CCNA_02683 | 4.973257   |
| 2840301..284 | + | 426 CCNA_02687 | 2.43993683 |
| 2844301..284 | + | 230 CCNA_02691 | 2.55303146 |
| 2867251..286 | + | 132 CCNA_02706 | 5.05242345 |
| 2874951..287 | + | 693 CCNA_02715 | 3.14112376 |
| 2879901..287 | + | 204 CCNA_02719 | 7.41610167 |
| 2881551..288 | + | 993 CCNA_02721 | 5.61789661 |
| 2889901..288 | - | 176 CCNA_02726 | 4.39647376 |
| 2895051..289 | - | 68 CCNA_02732  | 2.06672372 |
| 2908301..290 | - | 213 CCNA_02745 | 2.20243748 |
| 2926451..292 | - | 95 CCNA_02764  | 6.08158419 |
| 2927201..292 | - | 92 CCNA_02766  | 2.5982687  |
| 2928451..292 | - | 418 CCNA_02767 | 2.60957878 |
| 2929551..292 | - | 327 CCNA_02768 | 5.85539493 |
| 2931501..293 | - | 451 CCNA_02770 | 3.18636099 |
| 2936751..293 | + | 483 CCNA_02779 | 6.73753388 |
| 2939001..293 | + | 198 CCNA_02781 | 6.91848488 |
| 2940401..294 | - | 161 CCNA_02782 | 3.19767107 |
| 2946101..294 | + | 205 CCNA_02790 | 2.81314891 |
| 2955301..295 | - | 585 CCNA_02794 | 3.12981367 |
| 2960701..296 | - | 196 CCNA_02803 | 4.14766536 |
| 2960651..296 | + | 137 CCNA_02805 | 2.85838718 |
| 2960751..296 | + | 412 CCNA_02806 | 2.63219791 |
| 2973951..297 | - | 123 CCNA_02816 | 2.58695965 |
| 2975101..297 | + | 629 CCNA_02820 | 2.1685093  |
| 2979851..297 | - | 284 CCNA_02822 | 2.98279086 |

|              |   |                 |            |
|--------------|---|-----------------|------------|
| 2980801..298 | + | 340 CCNA_02826  | 2.70005428 |
| 2982201..298 | + | 88 CCNA_02827   | 2.88100528 |
| 2985601..298 | + | 422 CCNA_02832  | 3.08457644 |
| 2989551..298 | - | 209 CCNA_02835  | 4.74706774 |
| 2990601..299 | - | 186 CCNA_02837  | 3.17505194 |
| 3006951..300 | - | 456 CCNA_02852  | 3.10719454 |
| 3026151..302 | - | 442 CCNA_02877  | 2.23636567 |
| 3029051..302 | - | 567 CCNA_02880  | 2.36077038 |
| 3031001..303 | - | 133 CCNA_02882  | 2.12327104 |
| 3032901..303 | - | 541 CCNA_02883  | 2.0780338  |
| 3037951..303 | - | 168 CCNA_02889  | 2.03279554 |
| 3037651..303 | + | 34 CCNA_02890   | 3.17505194 |
| 3047001..304 | + | 502 CCNA_02896  | 2.21374757 |
| 3060301..306 | + | 249 CCNA_02904  | 2.11196198 |
| 3061101..306 | + | 125 CCNA_02905  | 2.02148649 |
| 3061301..306 | + | 364 CCNA_02906  | 3.38993112 |
| 3070001..307 | - | 108 CCNA_02911  | 2.06672372 |
| 3086401..308 | - | 92 CCNA_02924   | 3.43516939 |
| 3086701..308 | + | 388 CCNA_02925  | 2.30422307 |
| 3098951..309 | + | 140 CCNA_02939  | 2.63219791 |
| 3103851..310 | - | 169 CCNA_02943  | 3.15243281 |
| 3103901..310 | + | 246 CCNA_02944  | 3.93278618 |
| 3116401..311 | - | 123 CCNA_02957  | 2.43993683 |
| 3119001..311 | + | 75 CCNA_02962   | 2.42862675 |
| 3119801..311 | + | 348 CCNA_02964  | 3.23159925 |
| 3135901..313 | - | 394 CCNA_02979  | 2.11196198 |
| 3144101..314 | + | 164 CCNA_02991  | 2.93755259 |
| 3150201..315 | - | 1099 CCNA_02994 | 2.04410562 |
| 3153101..315 | - | 69 CCNA_02997   | 3.19767107 |
| 3153351..315 | - | 106 CCNA_02998  | 2.43993683 |
| 3155101..315 | - | 289 CCNA_03000  | 2.86969623 |
| 3160801..316 | + | 511 CCNA_03007  | 3.91016705 |
| 3174501..317 | + | 375 CCNA_03020  | 7.26907886 |
| 3180251..318 | + | 168 CCNA_03025  | 3.00540999 |
| 3184751..318 | + | 228 CCNA_03030  | 2.80183986 |
| 3187651..318 | + | 295 CCNA_03033  | 2.72267341 |
| 3195301..319 | - | 225 CCNA_03039  | 2.70005428 |
| 3196801..319 | - | 560 CCNA_03040  | 2.3268422  |
| 3197801..319 | - | 297 CCNA_03041  | 5.2446835  |
| 3207301..320 | - | 391 CCNA_03052  | 2.19112843 |
| 3209051..320 | + | 312 CCNA_03054  | 2.11196198 |
| 3215101..321 | - | 370 CCNA_03062  | 4.33992644 |
| 3219551..321 | - | 713 CCNA_03066  | 3.36731302 |
| 3222501..322 | + | 234 CCNA_03072  | 4.57742579 |
| 3240301..324 | - | 320 CCNA_03090  | 7.8006228  |
| 3240351..324 | + | 66 CCNA_03091   | 12.652384  |
| 3240751..324 | + | 458 CCNA_03092  | 3.57088315 |
| 3256651..325 | - | 216 CCNA_03105  | 2.4173177  |
| 3256901..325 | + | 167 CCNA_03107  | 3.15243281 |
| 3264451..326 | - | 259 CCNA_03113  | 2.47386501 |
| 3267301..326 | - | 79 CCNA_03118   | 2.77922073 |
| 3268351..326 | - | 205 CCNA_03119  | 5.34646908 |
| 3274701..327 | + | 412 CCNA_03127  | 2.22505662 |

|              |   |                 |            |
|--------------|---|-----------------|------------|
| 3279601..327 | - | 231 CCNA_03130  | 2.22505662 |
| 3280951..328 | - | 267 CCNA_03131  | 3.41255025 |
| 3281201..328 | - | 108 CCNA_03132  | 4.13635631 |
| 3282701..328 | + | 444 CCNA_03135  | 2.1685093  |
| 3284101..328 | + | 139 CCNA_03136  | 2.28160393 |
| 3294501..329 | - | 653 CCNA_03142  | 2.45124588 |
| 3296351..329 | - | 589 CCNA_03143  | 3.19767107 |
| 3301201..330 | + | 597 CCNA_03148  | 2.08934285 |
| 3311051..331 | + | 209 CCNA_03155  | 2.28160393 |
| 3311551..331 | + | 171 CCNA_03156  | 3.3333838  |
| 3316651..331 | + | 351 CCNA_03161  | 2.40600762 |
| 3326851..332 | - | 284 CCNA_03167  | 3.26552744 |
| 3331851..333 | - | 850 CCNA_03171  | 3.88754791 |
| 3332501..333 | + | 158 CCNA_03173  | 2.4173177  |
| 3340201..334 | - | 243 CCNA_03180  | 2.63219791 |
| 3340401..334 | + | 424 CCNA_03181  | 2.4173177  |
| 3346001..334 | - | 591 CCNA_03184  | 2.84707709 |
| 3345851..334 | + | 208 CCNA_03185  | 2.86969623 |
| 3353951..335 | - | 748 CCNA_03191  | 2.79052978 |
| 3358501..335 | - | 269 CCNA_03198  | 4.44171202 |
| 3363051..336 | - | 428 CCNA_03201  | 3.10719454 |
| 3366101..336 | + | 557 CCNA_03205  | 2.56434051 |
| 3372951..337 | + | 317 CCNA_03210  | 3.07326636 |
| 3375401..337 | + | 102 CCNA_03213  | 2.4173177  |
| 3386901..338 | - | 89 CCNA_03224   | 2.03279554 |
| 3400951..340 | - | 381 CCNA_03235  | 2.1685093  |
| 3407351..340 | - | 466 CCNA_03241  | 3.97802341 |
| 3423501..342 | + | 449 CCNA_03253  | 2.0101764  |
| 3435251..343 | - | 67 CCNA_03264   | 2.97148181 |
| 3457801..345 | - | 158 CCNA_03290  | 2.48517406 |
| 3459101..345 | - | 332 CCNA_03291  | 3.94409523 |
| 3466601..346 | + | 411 CCNA_03296  | 2.96017173 |
| 3467951..346 | + | 371 CCNA_03297  | 2.66612609 |
| 3485151..348 | + | 358 CCNA_03309  | 4.23814189 |
| 3490851..349 | + | 627 CCNA_03316  | 2.86969623 |
| 3498751..349 | - | 266 CCNA_03319  | 4.70182947 |
| 3498601..349 | + | 1078 CCNA_03320 | 4.96194692 |
| 3508401..350 | + | 121 CCNA_03327  | 3.52564489 |
| 3509951..351 | - | 275 CCNA_03328  | 2.13458112 |
| 3511351..351 | - | 267 CCNA_03331  | 3.14112376 |
| 3512551..351 | - | 274 CCNA_03332  | 3.22028917 |
| 3516501..351 | - | 626 CCNA_03334  | 2.54172138 |
| 3519301..351 | - | 188 CCNA_03337  | 2.02148649 |
| 3521501..352 | - | 270 CCNA_03339  | 3.80838147 |
| 3526301..352 | - | 173 CCNA_03346  | 2.77922073 |
| 3529051..352 | - | 62 CCNA_03349   | 2.85838718 |
| 3528951..352 | + | 65 CCNA_03350   | 5.34646908 |
| 3535501..353 | - | 108 CCNA_03356  | 3.34469389 |
| 3538451..353 | + | 363 CCNA_03360  | 2.04410562 |
| 3542851..354 | + | 254 CCNA_03365  | 2.70005428 |
| 3545051..354 | + | 142 CCNA_03368  | 2.94886267 |
| 3547201..354 | - | 159 CCNA_03371  | 2.84707709 |
| 3566351..356 | + | 119 CCNA_03395  | 4.11373718 |

|              |   |                |            |
|--------------|---|----------------|------------|
| 3566551..356 | + | 574 CCNA_03396 | 2.04410562 |
| 3569451..356 | - | 183 CCNA_03398 | 2.85838718 |
| 3573851..357 | - | 225 CCNA_03405 | 6.7262238  |
| 3573701..357 | + | 87 CCNA_03406  | 3.05064722 |
| 3576701..357 | - | 305 CCNA_03408 | 2.08934285 |
| 3581201..358 | - | 111 CCNA_03413 | 3.48040765 |
| 3585201..358 | - | 157 CCNA_03418 | 2.28160393 |
| 3590301..359 | + | 488 CCNA_03424 | 2.06672372 |
| 3596251..359 | + | 409 CCNA_03433 | 2.63219791 |
| 3597851..359 | + | 236 CCNA_03434 | 2.14589017 |
| 3605101..360 | - | 122 CCNA_03441 | 2.13458112 |
| 3605301..360 | - | 136 CCNA_03442 | 7.94764665 |
| 3608701..360 | + | 816 CCNA_03445 | 2.88100528 |
| 3613851..361 | - | 167 CCNA_03448 | 2.90362441 |
| 3616001..361 | + | 118 CCNA_03451 | 2.5982687  |
| 3624051..362 | - | 166 CCNA_03460 | 2.04410562 |
| 3628101..362 | - | 121 CCNA_03464 | 2.64350696 |
| 3629301..362 | - | 375 CCNA_03465 | 2.79052978 |
| 3629451..362 | + | 267 CCNA_03466 | 3.11850462 |
| 3637401..363 | - | 240 CCNA_04011 | 2.71136333 |
| 3637601..363 | + | 319 CCNA_03471 | 2.31553212 |
| 3638651..363 | + | 89 CCNA_03472  | 3.06195731 |
| 3648101..364 | - | 324 CCNA_03485 | 2.81314891 |
| 3649501..364 | - | 179 CCNA_03488 | 2.06672372 |
| 3652501..365 | - | 286 CCNA_03492 | 2.85838718 |
| 3654101..365 | - | 353 CCNA_03494 | 3.3333838  |
| 3660751..366 | - | 427 CCNA_03502 | 2.97148181 |
| 3661801..366 | - | 213 CCNA_03503 | 2.51910225 |
| 3663951..366 | - | 160 CCNA_03505 | 3.32207475 |
| 3663751..366 | + | 195 CCNA_03506 | 4.01195263 |
| 3667001..366 | - | 192 CCNA_03508 | 2.38338951 |
| 3672501..367 | - | 216 CCNA_03514 | 2.49648415 |
| 3672701..367 | - | 53 CCNA_03515  | 3.69528683 |
| 3673851..367 | - | 339 CCNA_03516 | 3.07326636 |
| 3676401..367 | - | 331 CCNA_03518 | 3.06195731 |
| 3687251..368 | - | 126 CCNA_03530 | 2.27029488 |
| 3688551..368 | - | 504 CCNA_03531 | 2.08934285 |
| 3688701..368 | + | 582 CCNA_03532 | 3.63873952 |
| 3695701..369 | + | 117 CCNA_03537 | 2.38338951 |
| 3697401..369 | + | 218 CCNA_03540 | 2.60957878 |
| 3698651..369 | + | 187 CCNA_03542 | 2.85838718 |
| 3702151..370 | + | 173 CCNA_03546 | 5.55003921 |
| 3710301..371 | + | 438 CCNA_03554 | 4.83754324 |
| 3714401..371 | - | 86 CCNA_03558  | 2.5982687  |
| 3714901..371 | - | 83 CCNA_03559  | 3.87623886 |
| 3720351..372 | + | 178 CCNA_03566 | 3.36731302 |
| 3730201..373 | - | 847 CCNA_03574 | 3.00540999 |
| 3740951..374 | + | 276 CCNA_03586 | 2.19112843 |
| 3744951..374 | + | 266 CCNA_03591 | 5.2220654  |
| 3750501..375 | - | 136 CCNA_03597 | 2.20243748 |
| 3750251..375 | + | 769 CCNA_03598 | 5.28992177 |
| 3754751..375 | + | 232 CCNA_03601 | 2.04410562 |
| 3764051..376 | - | 449 CCNA_03609 | 2.36077038 |

|              |   |                |            |
|--------------|---|----------------|------------|
| 3786251..378 | - | 237 CCNA_03629 | 4.24945094 |
| 3786801..378 | - | 188 CCNA_03630 | 4.13635631 |
| 3798601..379 | - | 76 CCNA_03638  | 2.33815125 |
| 3799151..379 | - | 106 CCNA_03639 | 2.08934285 |
| 3800451..380 | - | 425 CCNA_03640 | 2.54172138 |
| 3804401..380 | - | 195 CCNA_03645 | 2.70005428 |
| 3805801..380 | - | 372 CCNA_03646 | 2.46255493 |
| 3806801..380 | + | 363 CCNA_03649 | 3.14112376 |
| 3808401..380 | + | 996 CCNA_03651 | 2.37207943 |
| 3819301..381 | - | 275 CCNA_03657 | 2.0101764  |
| 3834201..383 | + | 612 CCNA_03675 | 3.01671904 |
| 3835801..383 | + | 147 CCNA_03676 | 2.1685093  |
| 3843601..384 | - | 294 CCNA_03681 | 3.26552744 |
| 3843801..384 | + | 226 CCNA_03682 | 2.49648415 |
| 3854451..385 | - | 293 CCNA_03687 | 2.06672372 |
| 3854651..385 | - | 157 CCNA_03688 | 3.4012412  |
| 3854801..385 | + | 370 CCNA_03689 | 2.70005428 |
| 3865751..386 | + | 948 CCNA_03699 | 2.86969623 |
| 3869151..386 | - | 139 CCNA_03700 | 2.54172138 |
| 3871301..387 | - | 569 CCNA_03702 | 3.08457644 |
| 3876101..387 | - | 122 CCNA_03708 | 2.4173177  |
| 3876251..387 | - | 136 CCNA_03709 | 6.8166993  |
| 3877551..387 | - | 208 CCNA_03711 | 3.10719454 |
| 3878501..387 | - | 204 CCNA_03712 | 2.14589017 |
| 3880651..388 | - | 252 CCNA_03714 | 3.42386034 |
| 3881501..388 | - | 186 CCNA_03715 | 2.83576804 |
| 3882401..388 | - | 220 CCNA_03716 | 3.53695497 |
| 3882501..388 | - | 205 CCNA_03717 | 3.59350228 |
| 3884701..388 | + | 84 CCNA_03720  | 2.04410562 |
| 3895851..389 | - | 386 CCNA_03726 | 3.43516939 |
| 3897351..389 | - | 97 CCNA_03728  | 2.27029488 |
| 3899301..389 | - | 202 CCNA_03731 | 2.0780338  |
| 3906401..390 | + | 123 CCNA_03736 | 5.94587042 |
| 3910501..391 | - | 328 CCNA_03740 | 2.99409991 |
| 3911751..391 | - | 381 CCNA_03741 | 3.84231068 |
| 3911801..391 | + | 144 CCNA_03742 | 2.58695965 |
| 3913851..391 | - | 479 CCNA_03743 | 2.13458112 |
| 3915951..391 | - | 280 CCNA_03745 | 3.10719454 |
| 3918251..391 | - | 341 CCNA_03747 | 2.98279086 |
| 3917901..391 | + | 185 CCNA_03748 | 2.30422307 |
| 3918451..391 | + | 300 CCNA_03749 | 3.12981367 |
| 3930851..393 | + | 139 CCNA_03761 | 3.27683649 |
| 3934401..393 | - | 187 CCNA_03765 | 2.98279086 |
| 3935101..393 | - | 193 CCNA_03766 | 3.29945562 |
| 3937051..393 | - | 508 CCNA_03768 | 2.91493449 |
| 3938851..393 | - | 320 CCNA_03770 | 2.3494603  |
| 3945851..394 | - | 110 CCNA_03779 | 6.5452728  |
| 3950801..395 | + | 221 CCNA_03783 | 2.29291298 |
| 3954351..395 | + | 170 CCNA_03788 | 2.83576804 |
| 3955151..395 | - | 127 CCNA_03789 | 2.13458112 |
| 3955301..395 | + | 91 CCNA_03790  | 4.20421268 |
| 3959251..395 | + | 336 CCNA_03796 | 2.1685093  |
| 3966501..396 | + | 718 CCNA_03802 | 2.36077038 |



|              |   |                |            |
|--------------|---|----------------|------------|
| 3968801..396 | + | 361 CCNA_03803 | 3.15243281 |
| 3970201..397 | - | 110 CCNA_03804 | 2.08934285 |
| 3971801..397 | + | 220 CCNA_03807 | 3.11850462 |
| 3972501..397 | + | 170 CCNA_03808 | 3.19767107 |
| 3972951..397 | + | 269 CCNA_03809 | 3.03933817 |
| 3976551..397 | + | 457 CCNA_03813 | 4.28337913 |
| 3981701..398 | - | 708 CCNA_03816 | 3.88754791 |
| 3981951..398 | + | 289 CCNA_03817 | 4.7244486  |
| 3986451..398 | + | 219 CCNA_03820 | 2.13458112 |
| 3992351..399 | - | 184 CCNA_03826 | 3.4917167  |
| 3994401..399 | + | 396 CCNA_03830 | 3.14112376 |
| 3997351..399 | + | 202 CCNA_03832 | 2.31553212 |
| 4002201..400 | - | 403 CCNA_03835 | 2.19112843 |
| 4003301..400 | - | 181 CCNA_03837 | 2.19112843 |
| 4013101..401 | - | 158 CCNA_03846 | 4.973257   |
| 4016851..401 | + | 244 CCNA_03852 | 3.27683649 |
| 4020101..402 | - | 189 CCNA_03855 | 2.83576804 |
| 4021551..402 | - | 234 CCNA_03857 | 3.63873952 |
| 4022851..402 | - | 232 CCNA_03859 | 2.06672372 |
| 4022801..402 | + | 169 CCNA_03860 | 3.03933817 |
| 4025401..402 | - | 150 CCNA_03863 | 3.00540999 |
| 4025351..402 | + | 234 CCNA_03864 | 4.41909289 |
| 4029151..402 | + | 350 CCNA_03867 | 3.50302678 |
| 4031451..403 | - | 304 CCNA_03868 | 2.90362441 |
| 4032601..403 | - | 267 CCNA_03869 | 2.14589017 |
| 4034801..403 | - | 640 CCNA_03871 | 3.7405251  |
| 4039851..403 | - | 477 CCNA_03876 | 3.61612142 |
| 4040651..404 | - | 171 CCNA_03877 | 2.14589017 |
| 4042801..404 | - | 363 CCNA_03879 | 2.19112843 |

| Start..end   | Strand | Product length | Gene code  | Z-score coverage<br>ChIP-seq<br>m6A in<br><i>ΔccrM</i> |
|--------------|--------|----------------|------------|--------------------------------------------------------|
| 851..900     | +      | 199            | CCNA_00002 | 2.66031876                                             |
| 1601..1650   | +      | 285            | CCNA_00003 | 3.01892589                                             |
| 3151..3200   | +      | 237            | CCNA_00005 | 2.36691293                                             |
| 3951..4000   | +      | 262            | CCNA_00006 | 2.04090645                                             |
| 4751..4800   | +      | 96             | CCNA_00007 | 2.10610775                                             |
| 10151..10200 | +      | 385            | CCNA_00011 | 2.75812071                                             |
| 11351..11400 | +      | 903            | CCNA_00012 | 2.62771811                                             |
| 17501..17550 | -      | 158            | CCNA_00014 | 2.0735071                                              |
| 17951..18000 | -      | 183            | CCNA_00015 | 2.39951358                                             |
| 19101..19150 | -      | 79             | CCNA_00017 | 4.32295182                                             |
| 19401..19450 | +      | 210            | CCNA_00019 | 2.98632524                                             |
| 20751..20800 | -      | 74             | CCNA_00020 | 2.8885233                                              |
| 23151..23200 | -      | 730            | CCNA_00021 | 2.823322                                               |
| 26601..26650 | -      | 550            | CCNA_00025 | 2.43211423                                             |
| 29551..29600 | -      | 900            | CCNA_00026 | 3.34493237                                             |
| 32851..32900 | -      | 851            | CCNA_00028 | 2.10610775                                             |
| 32901..32950 | +      | 210            | CCNA_00029 | 2.43211423                                             |
| 33301..33350 | +      | 244            | CCNA_00030 | 2.72552006                                             |
| 34701..34750 | -      | 128            | CCNA_00031 | 2.823322                                               |
| 35301..35350 | -      | 80             | CCNA_00032 | 2.0083058                                              |
| 38401..38450 | -      | 89             | CCNA_00034 | 2.43211423                                             |
| 39501..39550 | -      | 310            | CCNA_00035 | 2.46471487                                             |
| 40201..40250 | -      | 149            | CCNA_00036 | 2.17130904                                             |
| 41951..42000 | -      | 172            | CCNA_00039 | 2.59511747                                             |
| 42701..42750 | -      | 189            | CCNA_00040 | 2.56251682                                             |
| 46601..46650 | -      | 216            | CCNA_00042 | 2.20390969                                             |
| 48251..48300 | -      | 548            | CCNA_00043 | 2.9537246                                              |
| 50901..50950 | -      | 226            | CCNA_00047 | 2.8885233                                              |
| 53051..53100 | -      | 144            | CCNA_00049 | 2.0083058                                              |
| 54651..54700 | -      | 530            | CCNA_00050 | 3.44273432                                             |
| 55701..55750 | -      | 157            | CCNA_00052 | 2.52991617                                             |
| 58251..58300 | -      | 448            | CCNA_00054 | 2.33431228                                             |
| 59051..59100 | -      | 150            | CCNA_00056 | 2.59511747                                             |
| 60051..60100 | -      | 211            | CCNA_00057 | 3.83394209                                             |
| 61051..61100 | -      | 195            | CCNA_00059 | 2.36691293                                             |
| 68501..68550 | -      | 598            | CCNA_00064 | 2.52991617                                             |
| 72201..72250 | -      | 367            | CCNA_00069 | 2.49731552                                             |
| 73651..73700 | +      | 304            | CCNA_00072 | 2.04090645                                             |
| 78901..78950 | -      | 733            | CCNA_00074 | 2.98632524                                             |
| 79951..80000 | -      | 401            | CCNA_00075 | 2.26911099                                             |
| 80601..80650 | -      | 127            | CCNA_00076 | 4.25775052                                             |
| 81851..81900 | -      | 391            | CCNA_00077 | 3.99694533                                             |
| 85201..85250 | -      | 69             | CCNA_00081 | 2.36691293                                             |
| 88601..88650 | -      | 546            | CCNA_00083 | 2.10610775                                             |
| 90601..90650 | +      | 252            | CCNA_00085 | 2.23651034                                             |
| 97451..97500 | +      | 516            | CCNA_00088 | 3.08412719                                             |
| 102251..1023 | -      | 809            | CCNA_00089 | 2.36691293                                             |

|              |   |                 |            |
|--------------|---|-----------------|------------|
| 104951..1050 | - | 296 CCNA_00092  | 2.39951358 |
| 107001..1070 | + | 292 CCNA_00096  | 2.46471487 |
| 111151..1112 | - | 576 CCNA_00099  | 2.04090645 |
| 116451..1165 | + | 421 CCNA_00106  | 3.01892589 |
| 118551..1186 | - | 65 CCNA_00107   | 3.44273432 |
| 119151..1192 | - | 225 CCNA_00108  | 2.46471487 |
| 120001..1200 | - | 299 CCNA_00109  | 2.62771811 |
| 122651..1227 | + | 1115 CCNA_00115 | 3.37753302 |
| 127851..1279 | + | 606 CCNA_00117  | 2.72552006 |
| 129451..1295 | + | 747 CCNA_00118  | 2.04090645 |
| 131651..1317 | + | 153 CCNA_00119  | 2.62771811 |
| 132101..1321 | + | 172 CCNA_00120  | 2.0083058  |
| 133851..1339 | + | 260 CCNA_00123  | 2.30171163 |
| 134201..1342 | - | 136 CCNA_00122  | 2.13870839 |
| 135451..1355 | - | 218 CCNA_00124  | 3.21452978 |
| 136151..1362 | - | 222 CCNA_00125  | 2.33431228 |
| 138451..1385 | - | 408 CCNA_00128  | 2.823322   |
| 139101..1391 | - | 120 CCNA_00129  | 2.23651034 |
| 142601..1426 | + | 404 CCNA_00133  | 3.01892589 |
| 143601..1436 | + | 142 CCNA_00134  | 2.62771811 |
| 144251..1443 | + | 277 CCNA_00135  | 2.43211423 |
| 154751..1548 | - | 271 CCNA_00141  | 2.10610775 |
| 158601..1586 | + | 177 CCNA_00148  | 2.13870839 |
| 166651..1667 | + | 821 CCNA_00159  | 2.0083058  |
| 169451..1695 | + | 379 CCNA_00160  | 2.33431228 |
| 174751..1748 | + | 641 CCNA_00164  | 2.10610775 |
| 179951..1800 | + | 203 CCNA_00168  | 3.05152654 |
| 182951..1830 | + | 888 CCNA_00170  | 2.33431228 |
| 185501..1855 | + | 145 CCNA_00171  | 2.46471487 |
| 190851..1909 | + | 150 CCNA_00175  | 2.75812071 |
| 193751..1938 | + | 368 CCNA_00180  | 3.50793561 |
| 194651..1947 | + | 158 CCNA_00181  | 3.11672784 |
| 197401..1974 | - | 65 CCNA_00184   | 2.52991617 |
| 200151..2002 | - | 841 CCNA_00185  | 2.0083058  |
| 202751..2028 | - | 374 CCNA_00187  | 2.43211423 |
| 204501..2045 | + | 158 CCNA_00191  | 2.13870839 |
| 207151..2072 | - | 539 CCNA_00192  | 2.04090645 |
| 208601..2086 | - | 100 CCNA_00194  | 2.52991617 |
| 209301..2093 | - | 202 CCNA_00195  | 2.72552006 |
| 212351..2124 | + | 626 CCNA_00199  | 4.6489583  |
| 215701..2157 | - | 346 CCNA_00200  | 2.04090645 |
| 217251..2173 | + | 347 CCNA_00203  | 2.20390969 |
| 221551..2216 | + | 213 CCNA_00207  | 2.0735071  |
| 225301..2253 | - | 524 CCNA_00209  | 2.30171163 |
| 228601..2286 | + | 292 CCNA_00212  | 2.23651034 |
| 236601..2366 | - | 169 CCNA_00218  | 3.21452978 |
| 236651..2367 | + | 105 CCNA_00219  | 3.89914339 |
| 236951..2370 | + | 201 CCNA_00220  | 2.8885233  |
| 239701..2397 | + | 260 CCNA_00223  | 3.01892589 |
| 244401..2444 | + | 324 CCNA_00229  | 2.04090645 |
| 247801..2478 | + | 345 CCNA_00233  | 2.43211423 |
| 248751..2488 | + | 386 CCNA_00234  | 3.37753302 |
| 250601..2506 | - | 91 CCNA_00235   | 2.59511747 |

|              |   |                |            |
|--------------|---|----------------|------------|
| 252551..2526 | + | 235 CCNA_00237 | 2.66031876 |
| 255701..2557 | + | 92 CCNA_00241  | 2.85592265 |
| 257551..2576 | + | 94 CCNA_00245  | 2.75812071 |
| 257701..2577 | + | 261 CCNA_00246 | 2.69291941 |
| 261101..2611 | - | 466 CCNA_00248 | 2.75812071 |
| 261451..2615 | + | 427 CCNA_00250 | 2.39951358 |
| 270251..2703 | - | 283 CCNA_00256 | 2.0083058  |
| 273751..2738 | + | 347 CCNA_00261 | 2.79072136 |
| 273901..2739 | - | 236 CCNA_00260 | 3.34493237 |
| 274701..2747 | + | 290 CCNA_00262 | 2.20390969 |
| 277751..2778 | - | 417 CCNA_00264 | 2.04090645 |
| 284251..2843 | + | 200 CCNA_00270 | 2.26911099 |
| 286751..2868 | + | 173 CCNA_00273 | 2.26911099 |
| 287651..2877 | + | 120 CCNA_00274 | 2.59511747 |
| 289851..2899 | + | 386 CCNA_00277 | 2.59511747 |
| 294601..2946 | + | 110 CCNA_00282 | 2.33431228 |
| 296601..2966 | - | 221 CCNA_00284 | 3.18192913 |
| 297851..2979 | - | 304 CCNA_00285 | 2.04090645 |
| 298551..2986 | - | 152 CCNA_00286 | 2.8885233  |
| 307301..3073 | + | 431 CCNA_00293 | 2.10610775 |
| 309951..3100 | + | 230 CCNA_00296 | 2.92112395 |
| 314901..3149 | - | 197 CCNA_00300 | 2.39951358 |
| 323201..3232 | - | 607 CCNA_00307 | 2.8885233  |
| 324101..3241 | - | 77 CCNA_00309  | 2.0083058  |
| 325001..3250 | - | 259 CCNA_00310 | 2.20390969 |
| 326951..3270 | - | 133 CCNA_00312 | 2.33431228 |
| 328901..3289 | - | 609 CCNA_00313 | 2.62771811 |
| 329501..3295 | - | 203 CCNA_00314 | 2.52991617 |
| 330751..3308 | - | 509 CCNA_00315 | 2.20390969 |
| 333101..3331 | + | 345 CCNA_00318 | 2.26911099 |
| 340601..3406 | + | 229 CCNA_00328 | 2.33431228 |
| 340801..3408 | - | 220 CCNA_00327 | 2.66031876 |
| 340951..3410 | + | 182 CCNA_00329 | 2.0083058  |
| 343151..3432 | + | 224 CCNA_00332 | 2.36691293 |
| 345001..3450 | + | 186 CCNA_00334 | 2.26911099 |
| 347201..3472 | + | 257 CCNA_00337 | 2.20390969 |
| 353451..3535 | + | 294 CCNA_00341 | 2.9537246  |
| 357301..3573 | + | 402 CCNA_00343 | 3.01892589 |
| 360251..3603 | - | 329 CCNA_00345 | 2.33431228 |
| 361601..3616 | + | 59 CCNA_00347  | 4.583757   |
| 366001..3660 | - | 226 CCNA_00350 | 2.20390969 |
| 366051..3661 | + | 719 CCNA_00351 | 2.10610775 |
| 373401..3734 | + | 475 CCNA_00357 | 2.13870839 |
| 376851..3769 | + | 296 CCNA_00360 | 2.0083058  |
| 378751..3788 | - | 315 CCNA_00361 | 2.10610775 |
| 379651..3797 | - | 163 CCNA_00362 | 2.0735071  |
| 381601..3816 | - | 364 CCNA_00364 | 2.0735071  |
| 383051..3831 | + | 264 CCNA_00366 | 2.0083058  |
| 384501..3845 | + | 278 CCNA_00368 | 2.0083058  |
| 389251..3893 | - | 74 CCNA_00372  | 2.13870839 |
| 401551..4016 | + | 444 CCNA_00385 | 2.17130904 |
| 406001..4060 | + | 404 CCNA_00390 | 2.43211423 |
| 406151..4062 | - | 281 CCNA_00389 | 2.33431228 |

|              |   |                |            |
|--------------|---|----------------|------------|
| 406951..4070 | + | 185 CCNA_00391 | 2.8885233  |
| 407801..4078 | + | 444 CCNA_00392 | 2.20390969 |
| 418451..4185 | + | 256 CCNA_00401 | 2.17130904 |
| 420301..4203 | + | 171 CCNA_00404 | 3.01892589 |
| 420951..4210 | + | 285 CCNA_00405 | 2.0735071  |
| 422701..4227 | - | 127 CCNA_00406 | 2.92112395 |
| 427551..4276 | + | 233 CCNA_00414 | 3.7687408  |
| 430251..4303 | - | 132 CCNA_00416 | 2.33431228 |
| 440101..4401 | + | 500 CCNA_00435 | 2.26911099 |
| 450551..4506 | + | 155 CCNA_00443 | 2.69291941 |
| 450951..4510 | + | 293 CCNA_00444 | 2.43211423 |
| 451851..4519 | + | 344 CCNA_00445 | 2.20390969 |
| 452901..4529 | + | 129 CCNA_00446 | 3.05152654 |
| 453001..4530 | + | 187 CCNA_00447 | 2.69291941 |
| 454051..4541 | + | 200 CCNA_00449 | 2.20390969 |
| 459901..4599 | - | 378 CCNA_00452 | 2.20390969 |
| 461001..4610 | - | 363 CCNA_00453 | 2.13870839 |
| 462151..4622 | - | 270 CCNA_00454 | 2.33431228 |
| 487201..4872 | - | 322 CCNA_00471 | 2.59511747 |
| 491751..4918 | - | 936 CCNA_00474 | 2.0735071  |
| 494201..4942 | - | 64 CCNA_00477  | 2.823322   |
| 495351..4954 | + | 107 CCNA_00479 | 2.46471487 |
| 502451..5025 | - | 342 CCNA_00485 | 2.43211423 |
| 507551..5076 | - | 208 CCNA_00488 | 2.79072136 |
| 508101..5081 | - | 139 CCNA_00489 | 2.0083058  |
| 509301..5093 | + | 463 CCNA_00492 | 2.23651034 |
| 509801..5098 | - | 212 CCNA_00491 | 2.0735071  |
| 512101..5121 | + | 84 CCNA_00495  | 2.20390969 |
| 519101..5191 | + | 154 CCNA_00503 | 2.79072136 |
| 520551..5206 | + | 426 CCNA_00506 | 2.26911099 |
| 527201..5272 | - | 366 CCNA_00512 | 2.26911099 |
| 528251..5283 | - | 266 CCNA_00513 | 3.08412719 |
| 532551..5326 | - | 249 CCNA_00516 | 2.59511747 |
| 534101..5341 | - | 197 CCNA_00518 | 2.49731552 |
| 536451..5365 | - | 83 CCNA_00521  | 2.0735071  |
| 542851..5429 | + | 127 CCNA_00531 | 2.26911099 |
| 561701..5617 | - | 107 CCNA_00542 | 2.46471487 |
| 562451..5625 | + | 391 CCNA_00544 | 2.04090645 |
| 569651..5697 | - | 156 CCNA_00552 | 2.33431228 |
| 571501..5715 | + | 505 CCNA_00556 | 2.98632524 |
| 573751..5738 | - | 259 CCNA_00557 | 2.39951358 |
| 575601..5756 | + | 170 CCNA_00560 | 2.04090645 |
| 586251..5863 | - | 770 CCNA_00567 | 2.30171163 |
| 588201..5882 | - | 358 CCNA_00569 | 2.36691293 |
| 589451..5895 | - | 301 CCNA_00570 | 2.17130904 |
| 598801..5988 | + | 372 CCNA_00575 | 2.0083058  |
| 610351..6104 | - | 383 CCNA_04005 | 2.13870839 |
| 626301..6263 | - | 606 CCNA_00594 | 2.98632524 |
| 660351..6604 | + | 347 CCNA_00617 | 2.20390969 |
| 660601..6606 | - | 162 CCNA_00616 | 2.66031876 |
| 664301..6643 | + | 392 CCNA_00620 | 2.04090645 |
| 667001..6670 | + | 735 CCNA_00623 | 2.39951358 |
| 676101..6761 | + | 764 CCNA_00630 | 2.04090645 |

|              |   |                 |            |
|--------------|---|-----------------|------------|
| 678301..6783 | + | 150 CCNA_00631  | 2.98632524 |
| 690101..6901 | - | 902 CCNA_00638  | 2.17130904 |
| 692251..6923 | - | 91 CCNA_00640   | 2.13870839 |
| 695151..6952 | + | 430 CCNA_00645  | 2.49731552 |
| 697701..6977 | + | 261 CCNA_00647  | 3.34493237 |
| 710501..7105 | + | 630 CCNA_00656  | 2.23651034 |
| 719801..7198 | - | 124 CCNA_00662  | 2.36691293 |
| 729151..7292 | - | 250 CCNA_00670  | 2.39951358 |
| 734001..7340 | - | 79 CCNA_00676   | 2.13870839 |
| 734601..7346 | - | 229 CCNA_00677  | 2.20390969 |
| 735551..7356 | + | 311 CCNA_00679  | 2.79072136 |
| 738151..7382 | - | 245 CCNA_00681  | 2.39951358 |
| 745301..7453 | + | 776 CCNA_00689  | 2.52991617 |
| 757551..7576 | - | 113 CCNA_00697  | 2.10610775 |
| 783201..7832 | - | 435 CCNA_00726  | 2.9537246  |
| 799901..7999 | - | 152 CCNA_00741  | 2.17130904 |
| 800701..8007 | + | 188 CCNA_00743  | 2.26911099 |
| 810651..8107 | - | 438 CCNA_00751  | 2.66031876 |
| 820551..8206 | - | 566 CCNA_00760  | 2.26911099 |
| 822301..8223 | - | 313 CCNA_00763  | 2.39951358 |
| 846301..8463 | + | 407 CCNA_00784  | 2.56251682 |
| 850751..8508 | - | 108 CCNA_04003  | 2.49731552 |
| 851151..8512 | + | 450 CCNA_00788  | 2.0083058  |
| 871601..8716 | - | 615 CCNA_00806  | 2.39951358 |
| 886001..8860 | - | 242 CCNA_00824  | 4.29035117 |
| 890751..8908 | + | 504 CCNA_00828  | 2.79072136 |
| 894551..8946 | + | 983 CCNA_00831  | 2.39951358 |
| 906701..9067 | + | 826 CCNA_00839  | 2.0083058  |
| 941751..9418 | - | 591 CCNA_00862  | 2.13870839 |
| 970251..9703 | + | 754 CCNA_00892  | 2.04090645 |
| 974851..9749 | + | 131 CCNA_00895  | 2.23651034 |
| 995601..9956 | - | 88 CCNA_00917   | 2.33431228 |
| 1002651..100 | - | 180 CCNA_00925  | 2.23651034 |
| 1019301..101 | - | 307 CCNA_00942  | 2.75812071 |
| 1040951..104 | - | 232 CCNA_00965  | 2.17130904 |
| 1060601..106 | + | 234 CCNA_00981  | 2.13870839 |
| 1084051..108 | - | 303 CCNA_01001  | 2.39951358 |
| 1132851..113 | - | 261 CCNA_01037  | 2.49731552 |
| 1151151..115 | + | 240 CCNA_01052  | 2.62771811 |
| 1194701..119 | - | 175 CCNA_01088  | 2.62771811 |
| 1205351..120 | - | 396 CCNA_01099  | 2.13870839 |
| 1238301..123 | - | 176 CCNA_01133  | 2.0083058  |
| 1239601..123 | - | 127 CCNA_01135  | 2.10610775 |
| 1272201..127 | + | 2479 CCNA_01163 | 2.20390969 |
| 1302301..130 | + | 342 CCNA_01183  | 2.79072136 |
| 1305401..130 | + | 307 CCNA_01188  | 2.36691293 |
| 1315651..131 | - | 657 CCNA_01193  | 2.23651034 |
| 1406101..140 | - | 260 CCNA_01279  | 2.0083058  |
| 1407001..140 | + | 496 CCNA_01281  | 2.0735071  |
| 1416001..141 | - | 125 CCNA_01289  | 3.05152654 |
| 1438301..143 | + | 177 CCNA_01321  | 2.0083058  |
| 1463901..146 | - | 242 CCNA_01351  | 2.10610775 |
| 1532551..153 | + | 265 CCNA_01415  | 2.13870839 |

|              |   |                 |            |
|--------------|---|-----------------|------------|
| 1576851..157 | + | 55 CCNA_01469   | 2.72552006 |
| 1586601..158 | - | 248 CCNA_01478  | 2.46471487 |
| 1752501..175 | + | 283 CCNA_01634  | 2.0735071  |
| 1773901..177 | + | 163 CCNA_01652  | 2.39951358 |
| 1805801..180 | + | 485 CCNA_01679  | 2.04090645 |
| 1850251..185 | + | 250 CCNA_01724  | 2.52991617 |
| 1915801..191 | - | 311 CCNA_01787  | 2.56251682 |
| 2337601..233 | + | 185 CCNA_02186  | 2.17130904 |
| 2396151..239 | + | 285 CCNA_02247  | 2.20390969 |
| 2519901..251 | - | 88 CCNA_02374   | 2.17130904 |
| 2534251..253 | + | 237 CCNA_02390  | 2.10610775 |
| 2538051..253 | - | 220 CCNA_02394  | 2.39951358 |
| 2589351..258 | - | 252 CCNA_02447  | 2.04090645 |
| 2607601..260 | - | 435 CCNA_02464  | 3.47533497 |
| 2663251..266 | - | 233 CCNA_02512  | 2.26911099 |
| 2677101..267 | + | 365 CCNA_02529  | 2.0735071  |
| 2688301..268 | - | 340 CCNA_02538  | 2.0083058  |
| 2696601..269 | - | 125 CCNA_02547  | 2.0083058  |
| 2721451..272 | - | 209 CCNA_02569  | 2.56251682 |
| 2880601..288 | + | 362 CCNA_02720  | 2.17130904 |
| 2890701..289 | + | 101 CCNA_02728  | 2.04090645 |
| 2921001..292 | + | 239 CCNA_02757  | 2.33431228 |
| 2926951..292 | - | 127 CCNA_02765  | 2.0083058  |
| 2960001..296 | + | 66 CCNA_02804   | 2.0083058  |
| 2980351..298 | + | 130 CCNA_02825  | 2.0735071  |
| 2997301..299 | - | 100 CCNA_02843  | 2.46471487 |
| 2997601..299 | - | 72 CCNA_02844   | 2.0083058  |
| 3010451..301 | - | 60 CCNA_02857   | 2.52991617 |
| 3064701..306 | - | 241 CCNA_02908  | 2.0083058  |
| 3085851..308 | - | 1024 CCNA_02923 | 2.49731552 |
| 3088651..308 | + | 245 CCNA_02927  | 2.20390969 |
| 3099001..309 | + | 140 CCNA_02939  | 2.30171163 |
| 3128501..312 | + | 117 CCNA_02973  | 2.10610775 |
| 3138401..313 | + | 330 CCNA_02983  | 2.0735071  |
| 3160601..316 | + | 511 CCNA_03007  | 2.17130904 |
| 3165401..316 | - | 169 CCNA_03011  | 2.0083058  |
| 3169151..316 | - | 167 CCNA_03016  | 2.23651034 |
| 3189101..318 | - | 64 CCNA_03034   | 2.17130904 |
| 3206301..320 | - | 132 CCNA_03051  | 3.05152654 |
| 3233051..323 | - | 574 CCNA_03083  | 2.13870839 |
| 3241801..324 | + | 158 CCNA_03093  | 2.30171163 |
| 3245351..324 | - | 341 CCNA_03095  | 2.75812071 |
| 3261651..326 | - | 122 CCNA_03110  | 2.0083058  |
| 3268101..326 | - | 205 CCNA_03119  | 2.23651034 |
| 3269501..326 | - | 225 CCNA_03122  | 2.13870839 |
| 3282701..328 | + | 444 CCNA_03135  | 2.9537246  |
| 3329601..332 | - | 173 CCNA_03170  | 3.21452978 |
| 3333151..333 | + | 462 CCNA_03174  | 2.36691293 |
| 3335501..333 | - | 96 CCNA_03176   | 2.26911099 |
| 3342401..334 | - | 123 CCNA_03182  | 3.24713043 |
| 3345551..334 | + | 208 CCNA_03185  | 2.26911099 |
| 3363501..336 | + | 325 CCNA_03203  | 2.26911099 |
| 3363951..336 | - | 208 CCNA_03202  | 2.20390969 |

|              |   |                 |            |
|--------------|---|-----------------|------------|
| 3379801..337 | + | 1022 CCNA_03219 | 3.31233172 |
| 3384351..338 | + | 404 CCNA_03222  | 2.13870839 |
| 3385701..338 | + | 202 CCNA_03223  | 2.13870839 |
| 3388551..338 | - | 431 CCNA_03225  | 2.52991617 |
| 3408751..340 | - | 485 CCNA_03242  | 2.52991617 |
| 3411251..341 | - | 223 CCNA_03244  | 2.36691293 |
| 3425001..342 | + | 451 CCNA_03254  | 2.36691293 |
| 3426751..342 | + | 372 CCNA_03256  | 2.39951358 |
| 3431951..343 | + | 937 CCNA_03263  | 2.13870839 |
| 3435401..343 | - | 67 CCNA_03264   | 2.0083058  |
| 3438101..343 | + | 325 CCNA_03269  | 2.72552006 |
| 3440851..344 | - | 401 CCNA_03271  | 2.10610775 |
| 3441101..344 | + | 473 CCNA_03272  | 2.59511747 |
| 3446451..344 | - | 372 CCNA_03278  | 2.75812071 |
| 3457851..345 | - | 158 CCNA_03290  | 2.0083058  |
| 3460951..346 | - | 524 CCNA_03292  | 2.52991617 |
| 3464151..346 | + | 642 CCNA_03295  | 2.0083058  |
| 3466551..346 | + | 411 CCNA_03296  | 2.26911099 |
| 3479801..347 | - | 327 CCNA_03302  | 2.30171163 |
| 3481201..348 | - | 396 CCNA_03303  | 2.26911099 |
| 3487001..348 | - | 185 CCNA_03310  | 2.36691293 |
| 3489451..348 | + | 408 CCNA_03315  | 2.0083058  |
| 3512551..351 | - | 274 CCNA_03332  | 2.30171163 |
| 3514701..351 | - | 797 CCNA_03333  | 2.36691293 |
| 3520701..352 | - | 443 CCNA_03338  | 2.43211423 |
| 3522651..352 | - | 232 CCNA_03341  | 2.39951358 |
| 3526351..352 | - | 173 CCNA_03346  | 2.0083058  |
| 3529451..352 | - | 62 CCNA_03349   | 2.0735071  |
| 3532101..353 | - | 277 CCNA_03353  | 2.30171163 |
| 3538301..353 | + | 363 CCNA_03360  | 2.0083058  |
| 3544601..354 | + | 166 CCNA_03367  | 2.13870839 |
| 3544901..354 | + | 142 CCNA_03368  | 2.23651034 |
| 3545801..354 | + | 173 CCNA_03370  | 2.66031876 |
| 3550951..355 | - | 151 CCNA_03377  | 2.36691293 |
| 3565751..356 | - | 192 CCNA_03393  | 2.20390969 |
| 3569301..356 | - | 139 CCNA_03397  | 3.60573756 |
| 3569451..356 | - | 183 CCNA_03398  | 5.04016607 |
| 3572651..357 | + | 169 CCNA_03404  | 2.20390969 |
| 3575801..357 | - | 476 CCNA_03407  | 2.04090645 |
| 3576651..357 | - | 305 CCNA_03408  | 2.46471487 |
| 3581451..358 | - | 111 CCNA_03413  | 2.30171163 |
| 3584101..358 | - | 333 CCNA_03416  | 2.04090645 |
| 3590151..359 | - | 129 CCNA_03423  | 2.30171163 |
| 3590201..359 | + | 488 CCNA_03424  | 2.39951358 |
| 3593551..359 | - | 89 CCNA_03428   | 2.23651034 |
| 3604451..360 | - | 330 CCNA_03440  | 2.26911099 |
| 3622001..362 | - | 161 CCNA_03458  | 3.37753302 |
| 3624901..362 | - | 139 CCNA_03461  | 2.10610775 |
| 3633151..363 | + | 597 CCNA_03468  | 2.85592265 |
| 3637801..363 | - | 240 CCNA_04011  | 2.46471487 |
| 3638551..363 | + | 89 CCNA_03472   | 3.24713043 |
| 3639701..363 | - | 75 CCNA_03474   | 2.0735071  |
| 3640451..364 | + | 149 CCNA_03476  | 3.05152654 |



|              |   |                |            |
|--------------|---|----------------|------------|
| 3646851..364 | - | 314 CCNA_03483 | 2.04090645 |
| 3648001..364 | - | 324 CCNA_03485 | 2.9537246  |
| 3651601..365 | - | 260 CCNA_03491 | 2.26911099 |
| 3653401..365 | - | 143 CCNA_03493 | 3.11672784 |
| 3654351..365 | - | 353 CCNA_03494 | 2.98632524 |
| 3655701..365 | + | 150 CCNA_03497 | 2.52991617 |
| 3658501..365 | - | 469 CCNA_03500 | 2.85592265 |
| 3660851..366 | - | 427 CCNA_03502 | 3.14932848 |
| 3661251..366 | + | 603 CCNA_03504 | 3.31233172 |
| 3661401..366 | - | 213 CCNA_03503 | 2.23651034 |
| 3663701..366 | + | 195 CCNA_03506 | 3.01892589 |
| 3668351..366 | - | 423 CCNA_03509 | 2.23651034 |
| 3671151..367 | - | 120 CCNA_03512 | 2.17130904 |
| 3671851..367 | - | 290 CCNA_03513 | 2.04090645 |
| 3672501..367 | - | 216 CCNA_03514 | 3.86654274 |
| 3675751..367 | - | 552 CCNA_03517 | 2.17130904 |
| 3677651..367 | + | 278 CCNA_03521 | 2.62771811 |
| 3678601..367 | + | 490 CCNA_03522 | 2.98632524 |
| 3682901..368 | - | 626 CCNA_03524 | 2.0083058  |
| 3684701..368 | - | 453 CCNA_03527 | 3.57313691 |
| 3685751..368 | + | 253 CCNA_03529 | 2.23651034 |
| 3692851..369 | + | 328 CCNA_03534 | 3.31233172 |
| 3697001..369 | - | 289 CCNA_03538 | 2.23651034 |
| 3697051..369 | + | 120 CCNA_03539 | 2.17130904 |
| 3697201..369 | + | 218 CCNA_03540 | 2.23651034 |
| 3698151..369 | + | 279 CCNA_03541 | 2.62771811 |
| 3698751..369 | + | 187 CCNA_03542 | 2.85592265 |
| 3702201..370 | + | 173 CCNA_03546 | 2.20390969 |
| 3709601..370 | + | 172 CCNA_03553 | 3.24713043 |
| 3710351..371 | + | 438 CCNA_03554 | 3.44273432 |
| 3713101..371 | - | 110 CCNA_03556 | 2.17130904 |
| 3714501..371 | - | 83 CCNA_03559  | 2.0083058  |
| 3717101..371 | - | 291 CCNA_03561 | 2.39951358 |
| 3720651..372 | + | 435 CCNA_03567 | 2.23651034 |
| 3721901..372 | + | 254 CCNA_03568 | 2.17130904 |
| 3722851..372 | + | 306 CCNA_03569 | 2.13870839 |
| 3725151..372 | + | 143 CCNA_03572 | 2.39951358 |
| 3730301..373 | - | 847 CCNA_03574 | 2.43211423 |
| 3736851..373 | + | 102 CCNA_03579 | 2.26911099 |
| 3741051..374 | + | 276 CCNA_03586 | 2.75812071 |
| 3742501..374 | - | 47 CCNA_03587  | 2.43211423 |
| 3746901..374 | - | 203 CCNA_03592 | 2.85592265 |
| 3749801..374 | - | 135 CCNA_03596 | 2.20390969 |
| 3754101..375 | + | 256 CCNA_03600 | 2.49731552 |
| 3760651..376 | - | 41 CCNA_03606  | 2.46471487 |
| 3764101..376 | - | 449 CCNA_03609 | 2.10610775 |
| 3767751..376 | + | 150 CCNA_03613 | 2.20390969 |
| 3770551..377 | + | 470 CCNA_03616 | 2.10610775 |
| 3777801..377 | + | 401 CCNA_03623 | 2.72552006 |
| 3787901..378 | + | 123 CCNA_03633 | 2.62771811 |
| 3790501..379 | + | 509 CCNA_03637 | 2.30171163 |
| 3798601..379 | - | 76 CCNA_03638  | 2.33431228 |
| 3799201..379 | - | 106 CCNA_03639 | 2.62771811 |

|              |   |                 |            |
|--------------|---|-----------------|------------|
| 3801101..380 | - | 260 CCNA_03641  | 2.20390969 |
| 3803701..380 | - | 135 CCNA_03644  | 2.04090645 |
| 3804451..380 | - | 195 CCNA_03645  | 3.44273432 |
| 3815451..381 | + | 127 CCNA_03653  | 2.72552006 |
| 3819251..381 | - | 275 CCNA_03657  | 2.26911099 |
| 3820501..382 | - | 410 CCNA_03658  | 2.04090645 |
| 3825751..382 | + | 1079 CCNA_03665 | 2.13870839 |
| 3829901..382 | - | 62 CCNA_03668   | 2.36691293 |
| 3830801..383 | + | 286 CCNA_03670  | 2.13870839 |
| 3833051..383 | - | 206 CCNA_03672  | 3.21452978 |
| 3838251..383 | - | 433 CCNA_03677  | 2.20390969 |
| 3839451..383 | - | 142 CCNA_03679  | 2.75812071 |
| 3843051..384 | - | 1195 CCNA_03680 | 2.52991617 |
| 3845101..384 | + | 222 CCNA_03684  | 2.75812071 |
| 3854501..385 | - | 293 CCNA_03687  | 2.92112395 |
| 3854751..385 | - | 157 CCNA_03688  | 2.17130904 |
| 3859801..385 | - | 251 CCNA_03693  | 2.33431228 |
| 3869101..386 | - | 139 CCNA_03700  | 2.8885233  |
| 3871301..387 | - | 569 CCNA_03702  | 3.08412719 |
| 3872551..387 | - | 213 CCNA_03703  | 2.9537246  |
| 3878351..387 | - | 204 CCNA_03712  | 2.0083058  |
| 3879751..387 | - | 497 CCNA_03713  | 2.85592265 |
| 3880651..388 | - | 252 CCNA_03714  | 2.26911099 |
| 3881501..388 | - | 186 CCNA_03715  | 2.52991617 |
| 3892701..389 | + | 541 CCNA_03725  | 2.36691293 |
| 3897151..389 | - | 97 CCNA_03728   | 2.36691293 |
| 3899301..389 | - | 202 CCNA_03731  | 2.36691293 |
| 3899351..389 | + | 390 CCNA_03732  | 2.23651034 |
| 3902051..390 | - | 436 CCNA_03733  | 2.0083058  |
| 3904001..390 | - | 678 CCNA_03734  | 2.72552006 |
| 3906901..390 | + | 98 CCNA_03737   | 3.27973108 |
| 3911951..391 | - | 381 CCNA_03741  | 2.20390969 |
| 3914701..391 | - | 356 CCNA_03744  | 2.79072136 |
| 3915501..391 | - | 280 CCNA_03745  | 2.62771811 |
| 3917901..391 | + | 185 CCNA_03748  | 2.20390969 |
| 3918051..391 | - | 341 CCNA_03747  | 2.62771811 |
| 3918501..391 | + | 300 CCNA_03749  | 3.01892589 |
| 3919401..391 | + | 417 CCNA_03750  | 2.43211423 |
| 3921701..392 | + | 298 CCNA_03752  | 2.26911099 |
| 3921901..392 | - | 177 CCNA_03751  | 2.59511747 |
| 3924751..392 | - | 232 CCNA_03754  | 3.05152654 |
| 3927101..392 | - | 309 CCNA_03756  | 2.39951358 |
| 3931251..393 | + | 32 CCNA_03762   | 2.20390969 |
| 3932451..393 | + | 284 CCNA_03764  | 2.39951358 |
| 3934401..393 | - | 187 CCNA_03765  | 6.18118876 |
| 3935151..393 | - | 193 CCNA_03766  | 2.56251682 |
| 3935301..393 | - | 165 CCNA_03767  | 2.30171163 |
| 3937901..393 | - | 193 CCNA_03769  | 2.92112395 |
| 3938701..393 | + | 348 CCNA_03771  | 2.26911099 |
| 3939601..393 | + | 141 CCNA_03772  | 3.34493237 |
| 3941701..394 | - | 391 CCNA_03773  | 2.72552006 |
| 3944501..394 | - | 350 CCNA_03777  | 2.20390969 |
| 3955101..395 | - | 127 CCNA_03789  | 2.10610775 |

|              |   |                |            |
|--------------|---|----------------|------------|
| 3956901..395 | - | 206 CCNA_03792 | 2.36691293 |
| 3957551..395 | + | 229 CCNA_03794 | 2.52991617 |
| 3961451..396 | - | 143 CCNA_03797 | 2.0083058  |
| 3964551..396 | - | 288 CCNA_03800 | 2.0735071  |
| 3970401..397 | - | 110 CCNA_03804 | 2.20390969 |
| 3972551..397 | + | 170 CCNA_03808 | 3.18192913 |
| 3972901..397 | + | 269 CCNA_03809 | 2.13870839 |
| 3974001..397 | + | 256 CCNA_03810 | 2.26911099 |
| 3976651..397 | + | 457 CCNA_03813 | 2.49731552 |
| 3979951..398 | - | 322 CCNA_03815 | 2.66031876 |
| 3981501..398 | + | 289 CCNA_03817 | 2.17130904 |
| 3981801..398 | - | 708 CCNA_03816 | 2.13870839 |
| 3983151..398 | - | 116 CCNA_03818 | 3.01892589 |
| 3986051..398 | + | 219 CCNA_03820 | 2.36691293 |
| 3992001..399 | - | 120 CCNA_03825 | 2.9537246  |
| 3993651..399 | + | 155 CCNA_03828 | 3.44273432 |
| 3994751..399 | - | 139 CCNA_03829 | 2.79072136 |
| 3995501..399 | + | 533 CCNA_03831 | 2.13870839 |
| 3996951..399 | + | 202 CCNA_03832 | 2.04090645 |
| 3998751..399 | - | 278 CCNA_03833 | 3.24713043 |
| 4000701..400 | - | 596 CCNA_03834 | 2.33431228 |
| 4001951..400 | - | 403 CCNA_03835 | 2.39951358 |
| 4003451..400 | - | 181 CCNA_03837 | 2.56251682 |
| 4003951..400 | + | 667 CCNA_03839 | 2.39951358 |
| 4009151..400 | - | 319 CCNA_03841 | 2.39951358 |
| 4009851..400 | - | 256 CCNA_03842 | 2.43211423 |
| 4010201..401 | + | 430 CCNA_03844 | 3.63833821 |
| 4013401..401 | - | 158 CCNA_03846 | 3.41013367 |
| 4015001..401 | - | 309 CCNA_03848 | 3.08412719 |
| 4016551..401 | + | 213 CCNA_03851 | 2.66031876 |
| 4016901..401 | + | 244 CCNA_03852 | 2.59511747 |
| 4018301..401 | + | 107 CCNA_03854 | 3.34493237 |
| 4022001..402 | - | 234 CCNA_03857 | 2.0083058  |
| 4024201..402 | - | 217 CCNA_03861 | 2.13870839 |
| 4024951..402 | + | 234 CCNA_03864 | 2.46471487 |
| 4028651..402 | + | 166 CCNA_03866 | 2.20390969 |
| 4029051..402 | + | 350 CCNA_03867 | 2.823322   |
| 4031701..403 | - | 304 CCNA_03868 | 2.92112395 |
| 4032251..403 | - | 267 CCNA_03869 | 2.8885233  |
| 4036901..403 | - | 85 CCNA_03873  | 3.73614015 |
| 4037151..403 | + | 321 CCNA_03875 | 3.7687408  |
| 4039751..403 | - | 477 CCNA_03876 | 2.30171163 |
| 4040551..404 | - | 171 CCNA_03877 | 2.49731552 |
| 4041651..404 | - | 347 CCNA_03878 | 2.10610775 |
