# Supplementary material for: DNA Binding of the Cell Cycle Transcriptional Regulator GcrA Depends on N6-Adenosine Methylation in Caulobacter crescentus and Other Alphaproteobacteria
Source: PubMed Central journal article supplement (PMC3667746; doi:10.1371/journal.pgen.1003541), 2013-05-30
Supplement: pgen.1003541.s016.pdf [file pgen.1003541.s016.pdf]

TABLE S4

| <b>Promoter fused with <i>lacZ</i></b>                                   | <b>Activity</b> |
|--------------------------------------------------------------------------|-----------------|
| <i>tipF</i> in WT (Xylose 5h)                                            | 101.8 ± 4.2     |
| <i>tipF</i> in $\Delta gcrA$ P <sub>xyl</sub> - <i>gcrA</i> (Xylose 5h)  | 89.1 ± 5.9      |
| <i>tipF</i> in WT (Glucose 5h)                                           | 103.5 ± 4.5     |
| <i>tipF</i> in $\Delta gcrA$ P <sub>xyl</sub> - <i>gcrA</i> (Glucose 5h) | 45.8 ± 5.2      |
| <i>tipF</i> promoter WT                                                  | 101.8 ± 2.5     |
| <i>tipF</i> promoter GA*NTC                                              | 60.8 ± 2.7      |

\* = mutation A to C
