# Supplementary material for: DNA Binding of the Cell Cycle Transcriptional Regulator GcrA Depends on N6-Adenosine Methylation in Caulobacter crescentus and Other Alphaproteobacteria
Source: PubMed Central journal article supplement (PMC3667746; doi:10.1371/journal.pgen.1003541), 2013-05-30
Supplement: pgen.1003541.s017.pdf [file pgen.1003541.s017.pdf]

TABLE S5

## Strains

| Name      | Organism or plasmid                              | Description                                                          | Source                            |
|-----------|--------------------------------------------------|----------------------------------------------------------------------|-----------------------------------|
| NA1000    | <i>Caulobacter crescentus</i>                    | Reference strain                                                     | /                                 |
| Rm1021    | <i>Sinorhizobium meliloti</i>                    | Reference strain                                                     | /                                 |
| 2308      | <i>Brucella melitensis</i> biovar <i>abortus</i> | Reference strain                                                     | Xavier de Bolle                   |
| CB15N     | <i>Caulobacter crescentus</i>                    | Reference strain                                                     | /                                 |
| gcrAts    | <i>Caulobacter crescentus</i>                    | GcrA temperature (37) sensitive (mutation T10P), grow at 30C         | Lucy Shapiro                      |
| EB510     | <i>Caulobacter crescentus</i>                    | CB15N + pMR20 (TetR)                                                 | This study                        |
| EB517     | <i>Caulobacter crescentus</i>                    | gcrAts + pMR20 (TetR)                                                | This study                        |
| EB514     | <i>Caulobacter crescentus</i>                    | CB15N + pMR20-GcrA( <i>S. meliloti</i> ) (TetR)                      | This study                        |
| EB519     | <i>Caulobacter crescentus</i>                    | gcrAts + pMR20-GcrA( <i>S. meliloti</i> ) (TetR)                     | This study                        |
| EB516     | <i>Caulobacter crescentus</i>                    | CB15N + pMR20-GcrA( <i>B. abortus</i> ) (TetR)                       | This study                        |
| EB521     | <i>Caulobacter crescentus</i>                    | gcrAts + pMR20-GcrA( <i>B. abortus</i> ) (TetR)                      | This study                        |
| EB516     | <i>Caulobacter crescentus</i>                    | CB15N + pMR20-GcrA( <i>C. crescentus</i> ) (TetR)                    | This study                        |
| EB523     | <i>Caulobacter crescentus</i>                    | gcrAts + pMR20-GcrA( <i>C. crescentus</i> ) (TetR)                   | This study                        |
| BL21(D3E) | <i>Escherichia coli</i>                          | Expression strain (induction by IPTG)                                | /                                 |
| UG2212    | <i>Caulobacter crescentus</i>                    | CB15N $\Delta$ ccrM:: $\Omega$ (SpecR), transduced from LS2144       | This study                        |
| LS3707    | <i>Caulobacter crescentus</i>                    | CB15N $\Delta$ gcrA:: $\Omega$ (SpecR) P <sub>xyI</sub> -gcrA (KanR) | Holtzendorff <i>et al.</i> , 2004 |
| LS2144    | <i>Caulobacter crescentus</i>                    | CB15N $\Delta$ ccrM:: $\Omega$ (SpecR) P <sub>xyI</sub> -ccrM (TetR) | Stephens <i>et al.</i> , 1996     |

## Plasmids

|       |                                          |                                                                                          |            |
|-------|------------------------------------------|------------------------------------------------------------------------------------------|------------|
| EB343 | pMR20 (TetR)                             | Low copy vector tetR                                                                     | R. Roberts |
| EB494 | pMR20-Pxyl-GcrA( <i>S. mel</i> ) (TetR)  | Low copy vector tetR expressing <i>S. meliloti</i> gcrA by a xylose inducible promoter   | This study |
| EB498 | pMR20-Pxyl-GcrA( <i>B. abor</i> ) (TetR) | Low copy vector tetR expressing <i>B. abortus</i> gcrA by a xylose inducible promoter    | This study |
| EB502 | pMR20-Pxyl-GcrA( <i>C. cres</i> ) (TetR) | Low copy vector tetR expressing <i>C. crescentus</i> gcrA by a xylose inducible promoter | This study |
| EB335 | pET-His6-GcrA(Cc)                        | <i>E. coli</i> IPTG-inducible vector expressing Cc gcrA                                  | This study |
| EB488 | pET-His6-GcrA(Sm)                        | <i>E. coli</i> IPTG-inducible vector expressing Sm gcrA                                  | This study |
| EB490 | pET-His6-GcrA(Ba)                        | <i>E. coli</i> IPTG-inducible vector expressing Ba gcrA                                  | This study |
| LT375 | P <sub>mipZ</sub> -lacZ                  | lacZ gene under the control of the wild-type mipZ promoter in plac290                    | This study |
| LT376 | P <sub>podJ</sub> -lacZ                  | lacZ gene under the control of the wild-type podJ promoter in plac290                    | This study |
| LT377 | P <sub>flaY</sub> -lacZ                  | lacZ gene under the control of the wild-type flaY promoter in plac290                    | This study |
| LT378 | P <sub>pleC</sub> -lacZ                  | lacZ gene under the control of the wild-type pleC promoter in plac290                    | This study |
| LT379 | P <sub>CCNA_0697</sub> -lacZ             | lacZ gene under the control of the wild-type CCNA_0697 promoter in plac290               | This study |
| LT432 | P <sub>tipF</sub> -lacZ                  | lacZ gene under the control of the wild-type tipF promoter in plac290                    | This study |
| LT380 | P <sub>mipZ</sub> -lacZ mut              | lacZ gene under the control of the GANTC-mutant mipZ promoter in plac290                 | This study |
| LT381 | P <sub>podJ</sub> -lacZ mut              | lacZ gene under the control of the GANTCmutant podJ promoter in plac290                  | This study |
| LT382 | P <sub>flaY</sub> -lacZ mut              | lacZ gene under the control of the GANTCmutant flaY promoter in plac290                  | This study |
| LT383 | P <sub>pleC</sub> -lacZ mut              | lacZ gene under the control of the GANTCmutant pleC promoter in plac290                  | This study |
| LT384 | P <sub>CCNA_0697</sub> -lacZ mut         | lacZ gene under the control of the GANTCmutant CCNA_0697 promoter in plac290             | This study |
| LT433 | P <sub>tipF</sub> -lacZ mut              | lacZ gene under the control of the GANTCmutant tipF promoter in plac290                  | This study |
