# Supplementary material for: DNA Binding of the Cell Cycle Transcriptional Regulator GcrA Depends on N6-Adenosine Methylation in Caulobacter crescentus and Other Alphaproteobacteria
Source: PubMed Central journal article supplement (PMC3667746; doi:10.1371/journal.pgen.1003541), 2013-05-30
Supplement: pgen.1003541.s018.pdf [file pgen.1003541.s018.pdf]

| <b>Gene</b> | <b>Normalized coverage 100-300 GcrA wt</b> | <b>Normalized coverage 100-300 GcrA delccrM</b> | <b>log2(RATIO)</b> | <b>Z-score(log2RATIO)</b> |
|-------------|--------------------------------------------|-------------------------------------------------|--------------------|---------------------------|
| CCNA_00001  | 1.9312E-04                                 | 2.8189E-04                                      | -5.4568E-01        | -5.6341E-01               |
| CCNA_00002  | 7.3644E-05                                 | 9.5168E-05                                      | -3.6996E-01        | -4.5132E-01               |
| CCNA_00003  | 9.3250E-05                                 | 1.6158E-04                                      | -7.9308E-01        | -7.2121E-01               |
| CCNA_00004  | 7.9475E-05                                 | 9.5384E-05                                      | -2.6329E-01        | -3.8329E-01               |
| CCNA_00005  | 1.6732E-04                                 | 1.6344E-04                                      | 3.3873E-02         | -1.9375E-01               |
| CCNA_00006  | 9.8059E-05                                 | 1.4510E-04                                      | -5.6532E-01        | -5.7594E-01               |
| CCNA_00007  | 5.0057E-04                                 | 4.9199E-04                                      | 2.4959E-02         | -1.9943E-01               |
| CCNA_00008  | 2.8533E-04                                 | 1.7670E-04                                      | 6.9132E-01         | 2.2560E-01                |
| CCNA_00009  | 1.0134E-04                                 | 1.6886E-04                                      | -7.3664E-01        | -6.8521E-01               |
| CCNA_00010  | 1.0346E-04                                 | 1.6243E-04                                      | -6.5072E-01        | -6.3041E-01               |
| CCNA_00011  | 9.9511E-05                                 | 7.7418E-05                                      | 3.6211E-01         | 1.5616E-02                |
| CCNA_00012  | 1.7340E-04                                 | 1.5751E-04                                      | 1.3857E-01         | -1.2697E-01               |
| CCNA_00013  | 1.0126E-04                                 | 1.0133E-04                                      | -9.3727E-04        | -2.1595E-01               |
| CCNA_00014  | 7.8231E-05                                 | 6.2841E-05                                      | 3.1593E-01         | -1.3836E-02               |
| CCNA_00015  | 1.0416E-04                                 | 1.5442E-04                                      | -5.6804E-01        | -5.7767E-01               |
| CCNA_00016  | 5.6026E-05                                 | 5.3924E-05                                      | 5.5067E-02         | -1.8023E-01               |
| CCNA_00017  | 7.0578E-05                                 | 1.2598E-04                                      | -8.3590E-01        | -7.4853E-01               |
| CCNA_00018  | 1.4661E-04                                 | 1.6155E-04                                      | -1.3998E-01        | -3.0464E-01               |
| CCNA_00019  | 1.7686E-04                                 | 1.6086E-04                                      | 1.3676E-01         | -1.2812E-01               |
| CCNA_00020  | 4.7495E-04                                 | 1.6187E-04                                      | 1.5529E+00         | 7.7513E-01                |
| CCNA_00021  | 7.4263E-05                                 | 9.5724E-05                                      | -3.6626E-01        | -4.4897E-01               |
| CCNA_00022  | 2.4266E-04                                 | 2.0144E-04                                      | 2.6857E-01         | -4.4046E-02               |
| CCNA_00023  | 1.7982E-04                                 | 1.6214E-04                                      | 1.4930E-01         | -1.2012E-01               |
| CCNA_00024  | 1.1387E-04                                 | 6.1001E-05                                      | 9.0039E-01         | 3.5896E-01                |
| CCNA_00025  | 1.5101E-04                                 | 8.7138E-05                                      | 7.9317E-01         | 2.9057E-01                |
| CCNA_00026  | 1.2540E-04                                 | 1.0970E-04                                      | 1.9294E-01         | -9.2287E-02               |
| CCNA_00027  | 3.3472E-04                                 | 1.5366E-04                                      | 1.1232E+00         | 5.0106E-01                |
| CCNA_00028  | 2.1079E-04                                 | 1.6247E-04                                      | 3.7558E-01         | 2.4212E-02                |
| CCNA_00029  | 2.7816E-04                                 | 2.6645E-04                                      | 6.2007E-02         | -1.7580E-01               |
| CCNA_00030  | 8.0659E-05                                 | 1.6092E-04                                      | -9.9642E-01        | -8.5091E-01               |
| CCNA_00031  | 1.4627E-04                                 | 1.0525E-04                                      | 4.7470E-01         | 8.7429E-02                |
| CCNA_00032  | 1.1849E-04                                 | 1.0270E-04                                      | 2.0623E-01         | -8.3809E-02               |
| CCNA_00033  | 1.1100E-04                                 | 1.0265E-04                                      | 1.1277E-01         | -1.4342E-01               |
| CCNA_00034  | 3.0348E-04                                 | 3.5480E-04                                      | -2.2544E-01        | -3.5915E-01               |
| CCNA_00035  | 8.4413E-05                                 | 1.5813E-04                                      | -9.0552E-01        | -7.9293E-01               |
| CCNA_00036  | 9.1493E-05                                 | 1.6243E-04                                      | -8.2805E-01        | -7.4352E-01               |
| CCNA_00037  | 1.0512E-04                                 | 1.6243E-04                                      | -6.2776E-01        | -6.1576E-01               |
| CCNA_00038  | 6.9237E-05                                 | 1.5884E-04                                      | -1.1979E+00        | -9.7944E-01               |
| CCNA_00039  | 1.5468E-04                                 | 1.7540E-04                                      | -1.8145E-01        | -3.3109E-01               |
| CCNA_00040  | 9.7948E-05                                 | 3.9405E-05                                      | 1.3134E+00         | 6.2239E-01                |
| CCNA_00041  | 2.2381E-04                                 | 1.5291E-04                                      | 5.4953E-01         | 1.3516E-01                |
| CCNA_00042  | 7.0425E-05                                 | 8.1727E-05                                      | -2.1477E-01        | -3.5234E-01               |
| CCNA_00043  | 9.5206E-05                                 | 1.4882E-04                                      | -6.4444E-01        | -6.2640E-01               |
| CCNA_00044  | 6.1831E-04                                 | 3.4280E-04                                      | 8.5094E-01         | 3.2741E-01                |
| CCNA_00045  | 6.0250E-04                                 | 3.2861E-04                                      | 8.7456E-01         | 3.4248E-01                |
| CCNA_00046  | 8.7618E-05                                 | 1.3841E-04                                      | -6.5967E-01        | -6.3611E-01               |
| CCNA_00047  | 7.0333E-05                                 | 8.5920E-05                                      | -2.8884E-01        | -3.9959E-01               |
| CCNA_00048  | 3.5867E-04                                 | 1.6248E-04                                      | 1.1424E+00         | 5.1332E-01                |
| CCNA_00049  | 1.6753E-04                                 | 1.4482E-04                                      | 2.1013E-01         | -8.1322E-02               |
| CCNA_00050  | 6.5098E-05                                 | 3.2568E-05                                      | 9.9890E-01         | 4.2179E-01                |

|            |            |            |             |             |
|------------|------------|------------|-------------|-------------|
| CCNA_00051 | 1.4874E-04 | 1.1802E-04 | 3.3369E-01  | -2.5078E-03 |
| CCNA_00052 | 1.1032E-04 | 1.0364E-04 | 9.0058E-02  | -1.5791E-01 |
| CCNA_00053 | 7.2552E-05 | 1.6276E-04 | -1.1656E+00 | -9.5883E-01 |
| CCNA_00054 | 9.0998E-05 | 1.1213E-04 | -3.0132E-01 | -4.0755E-01 |
| CCNA_00055 | 4.6685E-04 | 2.0103E-04 | 1.2155E+00  | 5.5995E-01  |
| CCNA_00056 | 7.0920E-05 | 6.4225E-05 | 1.4298E-01  | -1.2416E-01 |
| CCNA_00057 | 9.4290E-05 | 1.5758E-04 | -7.4089E-01 | -6.8792E-01 |
| CCNA_00058 | 9.8748E-05 | 1.4951E-04 | -5.9848E-01 | -5.9709E-01 |
| CCNA_00059 | 8.7928E-05 | 7.2056E-05 | 2.8711E-01  | -3.2221E-02 |
| CCNA_00060 | 1.5430E-04 | 1.3521E-04 | 1.9045E-01  | -9.3873E-02 |
| CCNA_00061 | 1.6695E-04 | 1.4041E-04 | 2.4974E-01  | -5.6054E-02 |
| CCNA_00062 | 1.8447E-04 | 1.4998E-04 | 2.9862E-01  | -2.4880E-02 |
| CCNA_00063 | 1.3435E-04 | 1.8769E-04 | -4.8240E-01 | -5.2305E-01 |
| CCNA_00064 | 1.0342E-04 | 2.5019E-05 | 2.0471E+00  | 1.0904E+00  |
| CCNA_00065 | 8.1093E-05 | 1.6279E-04 | -1.0054E+00 | -8.5661E-01 |
| CCNA_00066 | 6.6019E-05 | 1.0681E-04 | -6.9414E-01 | -6.5810E-01 |
| CCNA_00067 | 6.3767E-05 | 1.0883E-04 | -7.7115E-01 | -7.0722E-01 |
| CCNA_00068 | 6.4571E-05 | 1.4041E-04 | -1.1206E+00 | -9.3014E-01 |
| CCNA_00069 | 2.0178E-04 | 1.7715E-04 | 1.8775E-01  | -9.5600E-02 |
| CCNA_00070 | 2.1758E-04 | 1.6354E-04 | 4.1191E-01  | 4.7383E-02  |
| CCNA_00071 | 8.2490E-05 | 8.5365E-05 | -4.9489E-02 | -2.4692E-01 |
| CCNA_00072 | 1.6020E-04 | 1.0223E-04 | 6.4802E-01  | 1.9798E-01  |
| CCNA_00073 | 1.0244E-04 | 9.8011E-05 | 6.3681E-02  | -1.7473E-01 |
| CCNA_00074 | 9.8859E-05 | 1.3703E-04 | -4.7103E-01 | -5.1579E-01 |
| CCNA_00075 | 8.3956E-05 | 7.8901E-05 | 8.9510E-02  | -1.5826E-01 |
| CCNA_00076 | 9.0919E-05 | 1.1473E-04 | -3.3556E-01 | -4.2939E-01 |
| CCNA_00077 | 8.9828E-05 | 9.4373E-05 | -7.1258E-02 | -2.6080E-01 |
| CCNA_00078 | 6.4830E-05 | 1.2801E-04 | -9.8151E-01 | -8.4140E-01 |
| CCNA_00079 | 4.7923E-04 | 4.8728E-04 | -2.4025E-02 | -2.3068E-01 |
| CCNA_00080 | 4.7922E-04 | 4.8728E-04 | -2.4067E-02 | -2.3070E-01 |
| CCNA_00081 | 2.0265E-04 | 1.6243E-04 | 3.1918E-01  | -1.1765E-02 |
| CCNA_00082 | 8.9370E-05 | 1.0453E-04 | -2.2613E-01 | -3.5959E-01 |
| CCNA_00083 | 8.9689E-05 | 1.0162E-04 | -1.8016E-01 | -3.3026E-01 |
| CCNA_00084 | 9.3287E-05 | 1.6712E-04 | -8.4111E-01 | -7.5185E-01 |
| CCNA_00085 | 9.3458E-05 | 1.6243E-04 | -7.9739E-01 | -7.2396E-01 |
| CCNA_00086 | 2.6438E-04 | 1.4134E-04 | 9.0345E-01  | 3.6091E-01  |
| CCNA_00087 | 1.6902E-04 | 8.9210E-05 | 9.2179E-01  | 3.7260E-01  |
| CCNA_00088 | 1.6389E-04 | 1.0085E-04 | 7.0053E-01  | 2.3148E-01  |
| CCNA_00089 | 1.1293E-04 | 4.7775E-05 | 1.2409E+00  | 5.7616E-01  |
| CCNA_00090 | 7.0374E-05 | 1.0549E-04 | -5.8394E-01 | -5.8782E-01 |
| CCNA_00091 | 2.1128E-04 | 1.1906E-04 | 8.2740E-01  | 3.1240E-01  |
| CCNA_00092 | 1.2266E-04 | 1.1210E-04 | 1.2983E-01  | -1.3254E-01 |
| CCNA_00093 | 1.0214E-04 | 8.0973E-05 | 3.3492E-01  | -1.7238E-03 |
| CCNA_00094 | 7.8074E-05 | 8.5688E-05 | -1.3431E-01 | -3.0102E-01 |
| CCNA_00095 | 9.3352E-05 | 1.4926E-04 | -6.7707E-01 | -6.4721E-01 |
| CCNA_00096 | 1.0004E-04 | 9.2649E-05 | 1.1064E-01  | -1.4478E-01 |
| CCNA_00097 | 5.9027E-05 | 1.5407E-04 | -1.3841E+00 | -1.0982E+00 |
| CCNA_00098 | 6.3105E-05 | 2.8665E-05 | 1.1382E+00  | 5.1062E-01  |
| CCNA_00099 | 6.9570E-05 | 1.6031E-04 | -1.2043E+00 | -9.8353E-01 |
| CCNA_00100 | 1.5294E-04 | 1.3701E-04 | 1.5867E-01  | -1.1415E-01 |
| CCNA_00101 | 1.0183E-04 | 6.7258E-05 | 5.9831E-01  | 1.6628E-01  |
| CCNA_00102 | 1.1874E-04 | 1.0137E-04 | 2.2819E-01  | -6.9804E-02 |
| CCNA_00103 | 6.0095E-05 | 1.5398E-04 | -1.3574E+00 | -1.0812E+00 |

|            |            |            |             |             |
|------------|------------|------------|-------------|-------------|
| CCNA_00104 | 1.2602E-04 | 1.5699E-04 | -3.1703E-01 | -4.1757E-01 |
| CCNA_00105 | 1.3138E-04 | 1.6243E-04 | -3.0606E-01 | -4.1057E-01 |
| CCNA_00106 | 1.6782E-04 | 6.8592E-05 | 1.2907E+00  | 6.0788E-01  |
| CCNA_00107 | 1.1542E-04 | 1.1613E-04 | -8.8727E-03 | -2.2101E-01 |
| CCNA_00108 | 7.1383E-05 | 8.2000E-05 | -2.0011E-01 | -3.4299E-01 |
| CCNA_00109 | 1.4142E-04 | 1.6109E-04 | -1.8788E-01 | -3.3519E-01 |
| CCNA_00110 | 1.2753E-04 | 1.1351E-04 | 1.6798E-01  | -1.0821E-01 |
| CCNA_00111 | 1.2041E-04 | 1.3453E-04 | -1.6006E-01 | -3.1744E-01 |
| CCNA_00112 | 6.7614E-05 | 5.2026E-05 | 3.7795E-01  | 2.5723E-02  |
| CCNA_00113 | 7.3547E-05 | 8.3823E-05 | -1.8875E-01 | -3.3574E-01 |
| CCNA_00114 | 6.8132E-05 | 1.4648E-04 | -1.1043E+00 | -9.1972E-01 |
| CCNA_00115 | 8.1019E-05 | 1.1810E-04 | -5.4368E-01 | -5.6213E-01 |
| CCNA_00116 | 1.4090E-04 | 1.6243E-04 | -2.0517E-01 | -3.4622E-01 |
| CCNA_00117 | 1.3911E-04 | 1.6243E-04 | -2.2356E-01 | -3.5795E-01 |
| CCNA_00118 | 1.1045E-04 | 8.6028E-05 | 3.6046E-01  | 1.4566E-02  |
| CCNA_00119 | 1.5749E-04 | 8.5613E-05 | 8.7928E-01  | 3.4549E-01  |
| CCNA_00120 | 7.8185E-05 | 7.8371E-05 | -3.4954E-03 | -2.1758E-01 |
| CCNA_00121 | 8.1024E-05 | 7.3978E-05 | 1.3116E-01  | -1.3169E-01 |
| CCNA_00122 | 1.1136E-04 | 1.5982E-04 | -5.2129E-01 | -5.4785E-01 |
| CCNA_00123 | 1.0429E-04 | 1.5648E-04 | -5.8538E-01 | -5.8873E-01 |
| CCNA_00124 | 1.0647E-04 | 1.3268E-04 | -3.1742E-01 | -4.1781E-01 |
| CCNA_00125 | 1.4796E-04 | 1.1870E-04 | 3.1787E-01  | -1.2602E-02 |
| CCNA_00126 | 6.7690E-04 | 2.3684E-04 | 1.5150E+00  | 7.5099E-01  |
| CCNA_00127 | 6.7679E-04 | 2.3803E-04 | 1.5075E+00  | 7.4621E-01  |
| CCNA_00128 | 1.0743E-04 | 1.6243E-04 | -5.9637E-01 | -5.9574E-01 |
| CCNA_00129 | 9.3407E-05 | 1.5702E-04 | -7.4937E-01 | -6.9333E-01 |
| CCNA_00130 | 3.1797E-04 | 6.4253E-04 | -1.0149E+00 | -8.6267E-01 |
| CCNA_00131 | 3.1763E-04 | 6.4137E-04 | -1.0138E+00 | -8.6201E-01 |
| CCNA_00132 | 9.0124E-05 | 1.5981E-04 | -8.2635E-01 | -7.4243E-01 |
| CCNA_00133 | 1.2570E-04 | 1.7032E-04 | -4.3827E-01 | -4.9490E-01 |
| CCNA_00134 | 1.5647E-04 | 8.6608E-05 | 8.5323E-01  | 3.2887E-01  |
| CCNA_00135 | 1.3137E-04 | 9.3420E-05 | 4.9172E-01  | 9.8288E-02  |
| CCNA_00136 | 1.5483E-04 | 1.6243E-04 | -6.9135E-02 | -2.5945E-01 |
| CCNA_00137 | 9.2741E-05 | 7.0838E-05 | 3.8860E-01  | 3.2513E-02  |
| CCNA_00138 | 9.4022E-05 | 7.0904E-05 | 4.0704E-01  | 4.4274E-02  |
| CCNA_00139 | 1.0734E-04 | 1.3864E-04 | -3.6921E-01 | -4.5085E-01 |
| CCNA_00140 | 9.8068E-05 | 5.1893E-05 | 9.1807E-01  | 3.7023E-01  |
| CCNA_00141 | 1.2171E-04 | 1.6276E-04 | -4.1928E-01 | -4.8279E-01 |
| CCNA_00142 | 8.4164E-05 | 5.3584E-05 | 6.5125E-01  | 2.0004E-01  |
| CCNA_00143 | 2.5251E-04 | 1.6243E-04 | 6.3651E-01  | 1.9064E-01  |
| CCNA_00144 | 1.3359E-04 | 1.1660E-04 | 1.9622E-01  | -9.0197E-02 |
| CCNA_00145 | 1.3374E-04 | 1.3181E-04 | 2.0966E-02  | -2.0198E-01 |
| CCNA_00146 | 1.9049E-04 | 7.6059E-05 | 1.3244E+00  | 6.2942E-01  |
| CCNA_00147 | 1.2787E-04 | 1.0482E-04 | 2.8667E-01  | -3.2501E-02 |
| CCNA_00148 | 1.4776E-04 | 1.6243E-04 | -1.3657E-01 | -3.0246E-01 |
| CCNA_00149 | 7.3191E-05 | 1.6132E-04 | -1.1402E+00 | -9.4263E-01 |
| CCNA_00150 | 1.1004E-04 | 1.2560E-04 | -1.9088E-01 | -3.3711E-01 |
| CCNA_00151 | 1.1766E-04 | 1.0312E-04 | 1.9025E-01  | -9.4001E-02 |
| CCNA_00152 | 1.1861E-04 | 9.8318E-05 | 2.7068E-01  | -4.2701E-02 |
| CCNA_00153 | 1.0126E-04 | 8.8191E-05 | 1.9928E-01  | -8.8242E-02 |
| CCNA_00154 | 3.6753E-04 | 1.6243E-04 | 1.1780E+00  | 5.3605E-01  |
| CCNA_00155 | 3.6198E-04 | 1.6243E-04 | 1.1561E+00  | 5.2203E-01  |
| CCNA_00156 | 6.5288E-05 | 7.1012E-05 | -1.2131E-01 | -2.9273E-01 |

|            |            |            |             |             |
|------------|------------|------------|-------------|-------------|
| CCNA_00157 | 7.5595E-05 | 1.5968E-04 | -1.0788E+00 | -9.0348E-01 |
| CCNA_00158 | 8.5768E-05 | 1.6881E-04 | -9.7686E-01 | -8.3843E-01 |
| CCNA_00159 | 3.2166E-04 | 1.5178E-04 | 1.0835E+00  | 4.7576E-01  |
| CCNA_00160 | 2.2808E-04 | 6.3180E-05 | 1.8518E+00  | 9.6580E-01  |
| CCNA_00161 | 4.3139E-04 | 1.7985E-04 | 1.2622E+00  | 5.8973E-01  |
| CCNA_00162 | 3.1739E-04 | 1.6199E-04 | 9.7035E-01  | 4.0358E-01  |
| CCNA_00163 | 1.6091E-04 | 1.0839E-04 | 5.7000E-01  | 1.4822E-01  |
| CCNA_00164 | 2.0240E-04 | 1.6231E-04 | 3.1843E-01  | -1.2242E-02 |
| CCNA_00165 | 1.4687E-04 | 7.7633E-05 | 9.1970E-01  | 3.7127E-01  |
| CCNA_00166 | 1.6789E-04 | 2.3527E-05 | 2.8347E+00  | 1.5927E+00  |
| CCNA_00167 | 1.7536E-04 | 4.2438E-05 | 2.0466E+00  | 1.0901E+00  |
| CCNA_00168 | 1.3994E-04 | 1.6243E-04 | -2.1505E-01 | -3.5252E-01 |
| CCNA_00169 | 8.5158E-05 | 1.6798E-05 | 2.3412E+00  | 1.2780E+00  |
| CCNA_00170 | 1.0958E-04 | 1.6272E-04 | -5.7043E-01 | -5.7919E-01 |
| CCNA_00171 | 1.3139E-04 | 1.6243E-04 | -3.0590E-01 | -4.1047E-01 |
| CCNA_00172 | 6.5306E-05 | 7.3912E-05 | -1.7865E-01 | -3.2930E-01 |
| CCNA_00173 | 7.7731E-05 | 6.7829E-05 | 1.9650E-01  | -9.0019E-02 |
| CCNA_00174 | 7.0425E-05 | 1.5866E-04 | -1.1717E+00 | -9.6272E-01 |
| CCNA_00175 | 1.0727E-04 | 1.6277E-04 | -6.0156E-01 | -5.9905E-01 |
| CCNA_00176 | 7.7662E-05 | 6.1896E-05 | 3.2726E-01  | -6.6127E-03 |
| CCNA_00177 | 7.1961E-05 | 6.1506E-05 | 2.2637E-01  | -7.0966E-02 |
| CCNA_00178 | 7.3436E-05 | 1.4681E-04 | -9.9934E-01 | -8.5277E-01 |
| CCNA_00179 | 8.2050E-05 | 1.5275E-04 | -8.9656E-01 | -7.8721E-01 |
| CCNA_00180 | 7.7574E-05 | 6.3015E-05 | 2.9978E-01  | -2.4136E-02 |
| CCNA_00181 | 9.2663E-05 | 8.9426E-05 | 5.1241E-02  | -1.8267E-01 |
| CCNA_00182 | 8.1907E-05 | 1.6243E-04 | -9.8772E-01 | -8.4536E-01 |
| CCNA_00183 | 7.5193E-05 | 1.5866E-04 | -1.0773E+00 | -9.0249E-01 |
| CCNA_00184 | 7.1156E-05 | 7.2603E-05 | -2.9112E-02 | -2.3392E-01 |
| CCNA_00185 | 1.3547E-04 | 1.6164E-04 | -2.5480E-01 | -3.7787E-01 |
| CCNA_00186 | 2.1386E-04 | 1.6242E-04 | 3.9689E-01  | 3.7801E-02  |
| CCNA_00187 | 9.1419E-05 | 1.0232E-04 | -1.6257E-01 | -3.1905E-01 |
| CCNA_00188 | 1.7106E-04 | 1.3432E-04 | 3.4878E-01  | 7.1134E-03  |
| CCNA_00189 | 1.8860E-04 | 1.6156E-04 | 2.2329E-01  | -7.2930E-02 |
| CCNA_00190 | 9.5872E-05 | 1.4593E-04 | -6.0616E-01 | -6.0198E-01 |
| CCNA_00191 | 9.1026E-05 | 1.6243E-04 | -8.3544E-01 | -7.4823E-01 |
| CCNA_00192 | 4.6583E-05 | 1.2375E-04 | -1.4095E+00 | -1.1144E+00 |
| CCNA_00193 | 7.6275E-05 | 1.5682E-04 | -1.0398E+00 | -8.7857E-01 |
| CCNA_00194 | 6.8479E-05 | 5.6592E-05 | 2.7493E-01  | -3.9987E-02 |
| CCNA_00195 | 5.7048E-05 | 5.8109E-05 | -2.6675E-02 | -2.3237E-01 |
| CCNA_00196 | 7.3302E-05 | 1.6243E-04 | -1.1479E+00 | -9.4750E-01 |
| CCNA_00197 | 1.0853E-04 | 8.0882E-05 | 4.2416E-01  | 5.5196E-02  |
| CCNA_00198 | 1.4529E-04 | 1.9717E-04 | -4.4044E-01 | -4.9628E-01 |
| CCNA_00199 | 1.5304E-04 | 3.1739E-04 | -1.0524E+00 | -8.8662E-01 |
| CCNA_00200 | 6.1263E-04 | 1.6243E-04 | 1.9152E+00  | 1.0062E+00  |
| CCNA_00201 | 8.4245E-04 | 1.2732E-04 | 2.7260E+00  | 1.5234E+00  |
| CCNA_00202 | 1.2220E-04 | 8.9185E-05 | 4.5425E-01  | 7.4390E-02  |
| CCNA_00203 | 1.1375E-04 | 1.3016E-04 | -1.9443E-01 | -3.3937E-01 |
| CCNA_00204 | 8.7169E-05 | 8.5058E-05 | 3.5304E-02  | -1.9283E-01 |
| CCNA_00205 | 1.4609E-04 | 9.8442E-05 | 5.6944E-01  | 1.4786E-01  |
| CCNA_00206 | 1.3919E-04 | 1.0088E-04 | 4.6433E-01  | 8.0817E-02  |
| CCNA_00207 | 7.6108E-05 | 1.5739E-04 | -1.0482E+00 | -8.8393E-01 |
| CCNA_00208 | 7.5147E-05 | 1.6243E-04 | -1.1120E+00 | -9.2463E-01 |
| CCNA_00209 | 2.4275E-04 | 1.6270E-04 | 5.7723E-01  | 1.5283E-01  |

|            |            |            |             |             |
|------------|------------|------------|-------------|-------------|
| CCNA_00210 | 1.8808E-04 | 1.5524E-04 | 2.7680E-01  | -3.8795E-02 |
| CCNA_00211 | 6.0872E-05 | 1.4510E-04 | -1.2532E+00 | -1.0147E+00 |
| CCNA_00212 | 9.3490E-05 | 1.6272E-04 | -7.9954E-01 | -7.2533E-01 |
| CCNA_00213 | 6.4863E-05 | 5.5540E-05 | 2.2375E-01  | -7.2634E-02 |
| CCNA_00214 | 8.1708E-05 | 7.0042E-05 | 2.2217E-01  | -7.3643E-02 |
| CCNA_00215 | 1.0727E-04 | 1.7853E-04 | -7.3497E-01 | -6.8414E-01 |
| CCNA_00216 | 1.1962E-04 | 1.0230E-04 | 2.2550E-01  | -7.1518E-02 |
| CCNA_00217 | 1.2513E-04 | 1.4201E-04 | -1.8258E-01 | -3.3181E-01 |
| CCNA_00218 | 1.0968E-04 | 9.6677E-05 | 1.8205E-01  | -9.9231E-02 |
| CCNA_00219 | 1.0588E-04 | 1.2833E-04 | -2.7745E-01 | -3.9232E-01 |
| CCNA_00220 | 9.8799E-05 | 1.5983E-04 | -6.9400E-01 | -6.5801E-01 |
| CCNA_00221 | 1.1489E-04 | 1.2564E-04 | -1.2913E-01 | -2.9771E-01 |
| CCNA_00222 | 1.1670E-04 | 1.4501E-04 | -3.1330E-01 | -4.1519E-01 |
| CCNA_00223 | 7.9294E-05 | 1.6063E-04 | -1.0184E+00 | -8.6494E-01 |
| CCNA_00224 | 1.1635E-04 | 8.1536E-05 | 5.1289E-01  | 1.1179E-01  |
| CCNA_00225 | 1.0590E-04 | 9.3238E-05 | 1.8368E-01  | -9.8196E-02 |
| CCNA_00226 | 1.7656E-04 | 1.6146E-04 | 1.2892E-01  | -1.3312E-01 |
| CCNA_00227 | 1.1841E-04 | 9.2649E-05 | 3.5392E-01  | 1.0395E-02  |
| CCNA_00228 | 9.9733E-05 | 1.6228E-04 | -7.0232E-01 | -6.6332E-01 |
| CCNA_00229 | 1.1047E-04 | 1.0834E-04 | 2.8147E-02  | -1.9740E-01 |
| CCNA_00230 | 8.7738E-05 | 9.4265E-05 | -1.0357E-01 | -2.8141E-01 |
| CCNA_00231 | 9.5109E-05 | 8.5928E-05 | 1.4638E-01  | -1.2199E-01 |
| CCNA_00232 | 2.5074E-04 | 2.0349E-04 | 3.0120E-01  | -2.3232E-02 |
| CCNA_00233 | 2.5286E-04 | 2.1488E-04 | 2.3476E-01  | -6.5611E-02 |
| CCNA_00234 | 7.5831E-05 | 9.5251E-05 | -3.2899E-01 | -4.2520E-01 |
| CCNA_00235 | 9.6589E-05 | 9.8450E-05 | -2.7593E-02 | -2.3295E-01 |
| CCNA_00236 | 2.3766E-04 | 2.6296E-04 | -1.4596E-01 | -3.0845E-01 |
| CCNA_00237 | 2.3952E-04 | 2.7782E-04 | -2.1402E-01 | -3.5186E-01 |
| CCNA_00238 | 1.0334E-04 | 1.6243E-04 | -6.5233E-01 | -6.3144E-01 |
| CCNA_00239 | 6.3609E-05 | 9.8309E-05 | -6.2810E-01 | -6.1598E-01 |
| CCNA_00240 | 3.3724E-04 | 1.0791E-04 | 1.6439E+00  | 8.3320E-01  |
| CCNA_00241 | 1.5125E-04 | 8.8091E-05 | 7.7973E-01  | 2.8199E-01  |
| CCNA_00242 | 1.9865E-04 | 1.5720E-04 | 3.3763E-01  | 1.8998E-06  |
| CCNA_00243 | 9.8119E-05 | 1.6273E-04 | -7.2990E-01 | -6.8091E-01 |
| CCNA_00244 | 1.1955E-04 | 1.4421E-04 | -2.7057E-01 | -3.8793E-01 |
| CCNA_00245 | 1.0529E-04 | 1.6246E-04 | -6.2570E-01 | -6.1445E-01 |
| CCNA_00246 | 9.2265E-05 | 1.0765E-04 | -2.2251E-01 | -3.5728E-01 |
| CCNA_00247 | 1.4438E-04 | 9.6793E-05 | 5.7681E-01  | 1.5256E-01  |
| CCNA_00248 | 2.2859E-04 | 2.3793E-04 | -5.7801E-02 | -2.5222E-01 |
| CCNA_00249 | 2.4495E-04 | 1.7920E-04 | 4.5090E-01  | 7.2254E-02  |
| CCNA_00250 | 1.6983E-04 | 1.6243E-04 | 6.4234E-02  | -1.7438E-01 |
| CCNA_00251 | 1.2752E-04 | 8.9376E-05 | 5.1268E-01  | 1.1166E-01  |
| CCNA_00252 | 1.4581E-04 | 1.6359E-04 | -1.6601E-01 | -3.2124E-01 |
| CCNA_00253 | 1.4960E-04 | 1.7636E-04 | -2.3737E-01 | -3.6676E-01 |
| CCNA_00254 | 6.3170E-05 | 3.3289E-05 | 9.2394E-01  | 3.7398E-01  |
| CCNA_00255 | 6.3295E-05 | 1.3810E-04 | -1.1256E+00 | -9.3329E-01 |
| CCNA_00256 | 1.6156E-04 | 1.1666E-04 | 4.6976E-01  | 8.4280E-02  |
| CCNA_00257 | 1.7794E-04 | 1.4202E-04 | 3.2518E-01  | -7.9358E-03 |
| CCNA_00258 | 2.0358E-04 | 1.6274E-04 | 3.2295E-01  | -9.3575E-03 |
| CCNA_00259 | 1.0694E-04 | 1.4773E-04 | -4.6618E-01 | -5.1270E-01 |
| CCNA_00260 | 1.8332E-04 | 1.5669E-04 | 2.2639E-01  | -7.0953E-02 |
| CCNA_00261 | 1.7538E-04 | 1.0893E-04 | 6.8700E-01  | 2.2284E-01  |
| CCNA_00262 | 5.7473E-05 | 1.6379E-04 | -1.5108E+00 | -1.1790E+00 |

|            |            |            |             |             |
|------------|------------|------------|-------------|-------------|
| CCNA_00263 | 7.9142E-05 | 1.2238E-04 | -6.2891E-01 | -6.1649E-01 |
| CCNA_00264 | 2.6326E-04 | 1.9986E-04 | 3.9750E-01  | 3.8191E-02  |
| CCNA_00265 | 5.2917E-04 | 2.3923E-04 | 1.1453E+00  | 5.1516E-01  |
| CCNA_00266 | 6.6014E-05 | 1.6128E-04 | -1.2887E+00 | -1.0374E+00 |
| CCNA_00267 | 5.5137E-04 | 1.6280E-04 | 1.7599E+00  | 9.0717E-01  |
| CCNA_00268 | 5.4211E-04 | 1.6319E-04 | 1.7320E+00  | 8.8939E-01  |
| CCNA_00269 | 5.8680E-05 | 1.0554E-04 | -8.4679E-01 | -7.5547E-01 |
| CCNA_00270 | 5.8569E-05 | 3.5303E-05 | 7.3013E-01  | 2.5036E-01  |
| CCNA_00271 | 8.5306E-05 | 2.9104E-05 | 1.5511E+00  | 7.7400E-01  |
| CCNA_00272 | 8.5116E-05 | 1.0332E-04 | -2.7969E-01 | -3.9375E-01 |
| CCNA_00273 | 1.6860E-04 | 1.6272E-04 | 5.1213E-02  | -1.8269E-01 |
| CCNA_00274 | 1.0237E-04 | 5.8076E-05 | 8.1763E-01  | 3.0617E-01  |
| CCNA_00275 | 2.0765E-04 | 1.7261E-04 | 2.6660E-01  | -4.5304E-02 |
| CCNA_00276 | 3.6208E-04 | 1.1040E-04 | 1.7135E+00  | 8.7758E-01  |
| CCNA_00277 | 4.0967E-04 | 7.5097E-05 | 2.4475E+00  | 1.3458E+00  |
| CCNA_00278 | 7.0495E-05 | 9.6528E-05 | -4.5346E-01 | -5.0458E-01 |
| CCNA_00279 | 1.1430E-03 | 1.3025E-04 | 3.1335E+00  | 1.7833E+00  |
| CCNA_00280 | 7.0097E-05 | 1.1324E-04 | -6.9200E-01 | -6.5674E-01 |
| CCNA_00281 | 1.0233E-04 | 1.0176E-04 | 8.0132E-03  | -2.1024E-01 |
| CCNA_00282 | 1.0272E-04 | 1.2207E-04 | -2.4900E-01 | -3.7417E-01 |
| CCNA_00283 | 7.3237E-05 | 1.5392E-04 | -1.0715E+00 | -8.9879E-01 |
| CCNA_00284 | 1.1327E-04 | 1.6243E-04 | -5.2006E-01 | -5.4707E-01 |
| CCNA_00285 | 8.3193E-05 | 1.5256E-04 | -8.7489E-01 | -7.7339E-01 |
| CCNA_00286 | 6.9709E-05 | 1.5985E-04 | -1.1973E+00 | -9.7903E-01 |
| CCNA_00287 | 9.1558E-05 | 1.6274E-04 | -8.2983E-01 | -7.4465E-01 |
| CCNA_00288 | 7.4971E-05 | 1.4134E-04 | -9.1472E-01 | -7.9880E-01 |
| CCNA_00289 | 6.3891E-05 | 7.0191E-06 | 3.1847E+00  | 1.8160E+00  |
| CCNA_00290 | 3.2055E-04 | 1.6179E-04 | 9.8641E-01  | 4.1382E-01  |
| CCNA_00291 | 5.8324E-04 | 2.3574E-04 | 1.3068E+00  | 6.1820E-01  |
| CCNA_00292 | 9.3028E-05 | 1.5982E-04 | -7.8075E-01 | -7.1335E-01 |
| CCNA_00293 | 8.7382E-05 | 5.2167E-05 | 7.4405E-01  | 2.5923E-01  |
| CCNA_00294 | 1.1468E-04 | 1.0161E-04 | 1.7458E-01  | -1.0400E-01 |
| CCNA_00295 | 9.6089E-05 | 9.9851E-05 | -5.5448E-02 | -2.5072E-01 |
| CCNA_00296 | 9.1604E-05 | 5.2929E-05 | 7.9119E-01  | 2.8930E-01  |
| CCNA_00297 | 1.5101E-04 | 1.0195E-04 | 5.6679E-01  | 1.4617E-01  |
| CCNA_00298 | 7.2035E-05 | 1.4680E-04 | -1.0270E+00 | -8.7045E-01 |
| CCNA_00299 | 8.6503E-05 | 1.1231E-04 | -3.7674E-01 | -4.5565E-01 |
| CCNA_00300 | 3.5545E-04 | 3.0972E-04 | 1.9865E-01  | -8.8645E-02 |
| CCNA_00301 | 3.9762E-04 | 3.2485E-04 | 2.9158E-01  | -2.9368E-02 |
| CCNA_00302 | 1.2265E-04 | 8.1851E-05 | 5.8338E-01  | 1.5675E-01  |
| CCNA_00303 | 5.7223E-05 | 1.9209E-05 | 1.5743E+00  | 7.8880E-01  |
| CCNA_00304 | 1.1669E-04 | 9.9809E-05 | 2.2537E-01  | -7.1602E-02 |
| CCNA_00305 | 9.8313E-05 | 1.6243E-04 | -7.2433E-01 | -6.7736E-01 |
| CCNA_00306 | 6.5750E-05 | 1.2911E-04 | -9.7355E-01 | -8.3632E-01 |
| CCNA_00307 | 1.1083E-04 | 2.3452E-04 | -1.0813E+00 | -9.0506E-01 |
| CCNA_00308 | 1.1339E-04 | 2.3908E-04 | -1.0762E+00 | -9.0178E-01 |
| CCNA_00309 | 1.4952E-04 | 1.5943E-04 | -9.2617E-02 | -2.7443E-01 |
| CCNA_00310 | 6.3656E-05 | 1.0176E-04 | -6.7689E-01 | -6.4710E-01 |
| CCNA_00311 | 1.2449E-04 | 6.4150E-05 | 9.5638E-01  | 3.9467E-01  |
| CCNA_00312 | 1.1449E-04 | 6.7299E-05 | 7.6642E-01  | 2.7351E-01  |
| CCNA_00313 | 1.0057E-04 | 1.2131E-04 | -2.7065E-01 | -3.8798E-01 |
| CCNA_00314 | 7.7879E-05 | 1.6243E-04 | -1.0605E+00 | -8.9176E-01 |
| CCNA_00315 | 6.8696E-05 | 4.7617E-05 | 5.2858E-01  | 1.2180E-01  |

|            |            |            |             |             |
|------------|------------|------------|-------------|-------------|
| CCNA_00316 | 7.0638E-05 | 1.2828E-04 | -8.6072E-01 | -7.6436E-01 |
| CCNA_00317 | 1.3599E-04 | 1.6243E-04 | -2.5635E-01 | -3.7886E-01 |
| CCNA_00318 | 1.2793E-04 | 1.3523E-04 | -8.0066E-02 | -2.6642E-01 |
| CCNA_00319 | 9.3680E-05 | 1.4205E-04 | -6.0058E-01 | -5.9843E-01 |
| CCNA_00320 | 1.6305E-04 | 5.7777E-05 | 1.4965E+00  | 7.3921E-01  |
| CCNA_00321 | 5.6292E-04 | 6.6317E-04 | -2.3646E-01 | -3.6618E-01 |
| CCNA_00322 | 5.6307E-04 | 6.6026E-04 | -2.2974E-01 | -3.6189E-01 |
| CCNA_00323 | 1.6297E-04 | 1.4233E-04 | 1.9530E-01  | -9.0779E-02 |
| CCNA_00324 | 4.9819E-04 | 1.9831E-04 | 1.3289E+00  | 6.3228E-01  |
| CCNA_00325 | 3.7965E-04 | 2.2437E-04 | 7.5876E-01  | 2.6862E-01  |
| CCNA_00326 | 4.5012E-04 | 1.9391E-04 | 1.2149E+00  | 5.5956E-01  |
| CCNA_00327 | 1.6028E-04 | 1.5504E-04 | 4.7866E-02  | -1.8482E-01 |
| CCNA_00328 | 1.3708E-04 | 1.0583E-04 | 3.7312E-01  | 2.2643E-02  |
| CCNA_00329 | 1.7705E-04 | 1.4344E-04 | 3.0368E-01  | -2.1650E-02 |
| CCNA_00330 | 1.1830E-04 | 1.3273E-04 | -1.6613E-01 | -3.2132E-01 |
| CCNA_00331 | 1.0187E-04 | 1.6386E-04 | -6.8575E-01 | -6.5275E-01 |
| CCNA_00332 | 9.1067E-05 | 9.2467E-05 | -2.2058E-02 | -2.2942E-01 |
| CCNA_00333 | 8.7266E-05 | 7.4277E-05 | 2.3243E-01  | -6.7098E-02 |
| CCNA_00334 | 7.6233E-05 | 1.6477E-04 | -1.1120E+00 | -9.2461E-01 |
| CCNA_00335 | 1.1078E-04 | 1.6085E-04 | -5.3799E-01 | -5.5850E-01 |
| CCNA_00336 | 6.4516E-05 | 9.7539E-05 | -5.9634E-01 | -5.9572E-01 |
| CCNA_00337 | 7.7704E-05 | 1.5783E-04 | -1.0223E+00 | -8.6740E-01 |
| CCNA_00338 | 1.2747E-04 | 9.1298E-05 | 4.8140E-01  | 9.1706E-02  |
| CCNA_00339 | 6.7512E-05 | 1.1652E-04 | -7.8741E-01 | -7.1760E-01 |
| CCNA_00340 | 1.6627E-04 | 2.2279E-04 | -4.2213E-01 | -4.8460E-01 |
| CCNA_00341 | 9.7402E-05 | 1.1444E-04 | -2.3255E-01 | -3.6368E-01 |
| CCNA_00342 | 9.1294E-05 | 4.1270E-05 | 1.1452E+00  | 5.1512E-01  |
| CCNA_00343 | 7.5674E-05 | 9.8616E-05 | -3.8206E-01 | -4.5905E-01 |
| CCNA_00344 | 6.6236E-05 | 3.7772E-05 | 8.1007E-01  | 3.0134E-01  |
| CCNA_00345 | 1.2481E-04 | 1.6243E-04 | -3.8002E-01 | -4.5775E-01 |
| CCNA_00346 | 1.4569E-04 | 1.7252E-04 | -2.4386E-01 | -3.7090E-01 |
| CCNA_00347 | 7.4587E-05 | 4.6582E-05 | 6.7900E-01  | 2.1774E-01  |
| CCNA_00348 | 2.2281E-04 | 1.6243E-04 | 4.5598E-01  | 7.5490E-02  |
| CCNA_00349 | 1.2947E-04 | 1.6254E-04 | -3.2821E-01 | -4.2470E-01 |
| CCNA_00350 | 2.6743E-04 | 2.1548E-04 | 3.1159E-01  | -1.6610E-02 |
| CCNA_00351 | 2.7483E-04 | 2.1462E-04 | 3.5671E-01  | 1.2175E-02  |
| CCNA_00352 | 2.8110E-04 | 1.6243E-04 | 7.9127E-01  | 2.8936E-01  |
| CCNA_00353 | 2.8996E-04 | 1.8077E-04 | 6.8169E-01  | 2.1946E-01  |
| CCNA_00354 | 3.7305E-04 | 2.4174E-04 | 6.2586E-01  | 1.8385E-01  |
| CCNA_00355 | 1.9389E-04 | 1.1054E-04 | 8.1058E-01  | 3.0167E-01  |
| CCNA_00356 | 9.1743E-05 | 1.1640E-04 | -3.4346E-01 | -4.3442E-01 |
| CCNA_00357 | 1.4656E-04 | 8.4569E-05 | 7.9316E-01  | 2.9056E-01  |
| CCNA_00358 | 1.4230E-04 | 7.4418E-05 | 9.3508E-01  | 3.8108E-01  |
| CCNA_00359 | 1.5521E-04 | 9.9370E-05 | 6.4329E-01  | 1.9497E-01  |
| CCNA_00360 | 1.0546E-04 | 1.6243E-04 | -6.2313E-01 | -6.1281E-01 |
| CCNA_00361 | 1.2622E-04 | 1.4894E-04 | -2.3885E-01 | -3.6770E-01 |
| CCNA_00362 | 6.2060E-05 | 6.0860E-05 | 2.8086E-02  | -1.9744E-01 |
| CCNA_00363 | 8.0511E-05 | 1.3279E-04 | -7.2192E-01 | -6.7582E-01 |
| CCNA_00364 | 8.1366E-05 | 7.1542E-05 | 1.8555E-01  | -9.7001E-02 |
| CCNA_00365 | 2.4688E-04 | 3.2455E-04 | -3.9465E-01 | -4.6707E-01 |
| CCNA_00366 | 2.5705E-04 | 3.0170E-04 | -2.3110E-01 | -3.6275E-01 |
| CCNA_00367 | 2.3777E-04 | 6.0346E-05 | 1.9780E+00  | 1.0463E+00  |
| CCNA_00368 | 7.8198E-05 | 1.3710E-04 | -8.1003E-01 | -7.3202E-01 |

|            |            |            |             |             |
|------------|------------|------------|-------------|-------------|
| CCNA_00369 | 1.8860E-04 | 1.6538E-04 | 1.8957E-01  | -9.4436E-02 |
| CCNA_00370 | 6.5020E-05 | 1.5044E-04 | -1.2102E+00 | -9.8730E-01 |
| CCNA_00371 | 8.0862E-05 | 6.4274E-05 | 3.3111E-01  | -4.1526E-03 |
| CCNA_00372 | 1.2055E-04 | 1.1302E-04 | 9.2973E-02  | -1.5605E-01 |
| CCNA_00373 | 1.1552E-04 | 1.2648E-04 | -1.3077E-01 | -2.9876E-01 |
| CCNA_00374 | 2.7904E-04 | 5.5682E-04 | -9.9673E-01 | -8.5111E-01 |
| CCNA_00375 | 2.4335E-04 | 4.2141E-04 | -7.9218E-01 | -7.2064E-01 |
| CCNA_00376 | 1.1262E-04 | 1.3457E-04 | -2.5695E-01 | -3.7925E-01 |
| CCNA_00377 | 7.6908E-05 | 6.9528E-05 | 1.4545E-01  | -1.2257E-01 |
| CCNA_00378 | 6.7901E-05 | 7.2719E-05 | -9.8972E-02 | -2.7848E-01 |
| CCNA_00379 | 3.1100E-04 | 2.0360E-04 | 6.1114E-01  | 1.7446E-01  |
| CCNA_00380 | 1.0700E-04 | 5.8556E-05 | 8.6960E-01  | 3.3932E-01  |
| CCNA_00381 | 1.0602E-04 | 9.7340E-05 | 1.2314E-01  | -1.3681E-01 |
| CCNA_00382 | 1.2802E-04 | 1.6243E-04 | -3.4345E-01 | -4.3442E-01 |
| CCNA_00383 | 2.0007E-04 | 1.8593E-04 | 1.0574E-01  | -1.4791E-01 |
| CCNA_00384 | 1.7420E-04 | 1.4448E-04 | 2.6983E-01  | -4.3245E-02 |
| CCNA_00385 | 7.7112E-05 | 7.0871E-05 | 1.2168E-01  | -1.3774E-01 |
| CCNA_00386 | 7.1470E-05 | 1.5934E-04 | -1.1566E+00 | -9.5310E-01 |
| CCNA_00387 | 6.9676E-05 | 1.2959E-04 | -8.9524E-01 | -7.8638E-01 |
| CCNA_00388 | 8.3354E-05 | 1.4796E-04 | -8.2785E-01 | -7.4339E-01 |
| CCNA_00389 | 5.7562E-04 | 1.4288E-04 | 2.0103E+00  | 1.0669E+00  |
| CCNA_00390 | 5.5858E-04 | 1.4714E-04 | 1.9245E+00  | 1.0122E+00  |
| CCNA_00391 | 7.4370E-05 | 4.8587E-05 | 6.1399E-01  | 1.7628E-01  |
| CCNA_00392 | 1.0792E-04 | 1.2731E-04 | -2.3840E-01 | -3.6741E-01 |
| CCNA_00393 | 8.4330E-05 | 1.3745E-04 | -7.0479E-01 | -6.6489E-01 |
| CCNA_00394 | 9.8156E-05 | 1.6460E-04 | -7.4579E-01 | -6.9105E-01 |
| CCNA_00395 | 1.1352E-04 | 7.9614E-05 | 5.1174E-01  | 1.1105E-01  |
| CCNA_00396 | 1.2904E-04 | 1.4343E-04 | -1.5263E-01 | -3.1270E-01 |
| CCNA_00397 | 1.3046E-04 | 1.1016E-04 | 2.4396E-01  | -5.9746E-02 |
| CCNA_00398 | 2.0945E-04 | 1.6278E-04 | 3.6362E-01  | 1.6578E-02  |
| CCNA_00399 | 1.8470E-04 | 1.4396E-04 | 3.5942E-01  | 1.3899E-02  |
| CCNA_00400 | 8.2698E-05 | 1.5425E-04 | -8.9932E-01 | -7.8897E-01 |
| CCNA_00401 | 7.7223E-05 | 5.6261E-05 | 4.5677E-01  | 7.5996E-02  |
| CCNA_00402 | 5.6017E-05 | 4.5264E-05 | 3.0735E-01  | -1.9311E-02 |
| CCNA_00403 | 9.4055E-05 | 9.5243E-05 | -1.8170E-02 | -2.2694E-01 |
| CCNA_00404 | 6.0789E-05 | 7.1932E-05 | -2.4288E-01 | -3.7027E-01 |
| CCNA_00405 | 6.2268E-05 | 3.4590E-05 | 8.4790E-01  | 3.2548E-01  |
| CCNA_00406 | 8.1421E-05 | 1.1138E-04 | -4.5201E-01 | -5.0366E-01 |
| CCNA_00407 | 8.5389E-05 | 3.4366E-05 | 1.3128E+00  | 6.2200E-01  |
| CCNA_00408 | 1.2454E-04 | 1.6285E-04 | -3.8698E-01 | -4.6218E-01 |
| CCNA_00409 | 1.4926E-04 | 1.5401E-04 | -4.5300E-02 | -2.4425E-01 |
| CCNA_00410 | 1.3413E-04 | 1.6694E-04 | -3.1572E-01 | -4.1673E-01 |
| CCNA_00411 | 7.6058E-05 | 7.7890E-05 | -3.4412E-02 | -2.3730E-01 |
| CCNA_00412 | 8.1264E-05 | 7.6059E-05 | 9.5436E-02  | -1.5448E-01 |
| CCNA_00413 | 1.7207E-04 | 1.6028E-04 | 1.0235E-01  | -1.5007E-01 |
| CCNA_00414 | 6.7188E-05 | 1.5614E-04 | -1.2166E+00 | -9.9133E-01 |
| CCNA_00415 | 1.0512E-04 | 1.5027E-04 | -5.1559E-01 | -5.4422E-01 |
| CCNA_00416 | 8.3502E-05 | 1.6334E-04 | -9.6796E-01 | -8.3276E-01 |
| CCNA_00417 | 1.0928E-04 | 4.4497E-04 | -2.0256E+00 | -1.5074E+00 |
| CCNA_00418 | 1.1671E-04 | 4.5193E-04 | -1.9532E+00 | -1.4612E+00 |
| CCNA_00419 | 1.1480E-04 | 4.7114E-04 | -2.0370E+00 | -1.5146E+00 |
| CCNA_00420 | 5.7478E-05 | 1.6197E-04 | -1.4946E+00 | -1.1687E+00 |
| CCNA_00421 | 8.3586E-05 | 5.0808E-05 | 7.1805E-01  | 2.4265E-01  |



|            |            |            |             |             |
|------------|------------|------------|-------------|-------------|
| CCNA_00422 | 3.7315E-04 | 3.1375E-04 | 2.5012E-01  | -5.5813E-02 |
| CCNA_00423 | 3.0582E-04 | 2.6714E-04 | 1.9504E-01  | -9.0948E-02 |
| CCNA_00424 | 8.5260E-05 | 8.1379E-05 | 6.7139E-02  | -1.7253E-01 |
| CCNA_00425 | 5.2299E-05 | 9.1307E-05 | -8.0395E-01 | -7.2814E-01 |
| CCNA_00426 | 9.6630E-05 | 1.0819E-04 | -1.6303E-01 | -3.1934E-01 |
| CCNA_00427 | 9.7897E-05 | 1.2465E-04 | -3.4852E-01 | -4.3765E-01 |
| CCNA_00428 | 8.6402E-05 | 1.2512E-04 | -5.3417E-01 | -5.5607E-01 |
| CCNA_00429 | 7.2451E-05 | 3.7068E-05 | 9.6660E-01  | 4.0118E-01  |
| CCNA_00430 | 6.8303E-05 | 1.1328E-04 | -7.2993E-01 | -6.8093E-01 |
| CCNA_00431 | 6.5496E-05 | 1.4258E-04 | -1.1223E+00 | -9.3118E-01 |
| CCNA_00432 | 9.7869E-05 | 1.0155E-04 | -5.3302E-02 | -2.4935E-01 |
| CCNA_00433 | 9.7046E-05 | 1.2385E-04 | -3.5187E-01 | -4.3979E-01 |
| CCNA_00434 | 7.7611E-05 | 2.6668E-05 | 1.5408E+00  | 7.6744E-01  |
| CCNA_00435 | 1.1911E-04 | 1.6259E-04 | -4.4895E-01 | -5.0171E-01 |
| CCNA_00436 | 7.7005E-05 | 5.1653E-05 | 5.7596E-01  | 1.5202E-01  |
| CCNA_00437 | 7.3080E-05 | 7.0904E-05 | 4.3524E-02  | -1.8759E-01 |
| CCNA_00438 | 4.1195E-04 | 9.6105E-05 | 2.0997E+00  | 1.1239E+00  |
| CCNA_00439 | 4.1421E-04 | 1.1609E-04 | 1.8350E+00  | 9.5508E-01  |
| CCNA_00440 | 6.9690E-05 | 5.2838E-05 | 3.9924E-01  | 3.9301E-02  |
| CCNA_00441 | 1.0135E-04 | 1.4703E-04 | -5.3675E-01 | -5.5771E-01 |
| CCNA_00442 | 9.1423E-05 | 5.0551E-05 | 8.5466E-01  | 3.2979E-01  |
| CCNA_00443 | 8.5135E-05 | 1.5363E-04 | -8.5160E-01 | -7.5854E-01 |
| CCNA_00444 | 1.0405E-04 | 1.5738E-04 | -5.9695E-01 | -5.9611E-01 |
| CCNA_00445 | 1.6755E-04 | 8.2158E-05 | 1.0281E+00  | 4.4039E-01  |
| CCNA_00446 | 1.2364E-04 | 1.6205E-04 | -3.9029E-01 | -4.6430E-01 |
| CCNA_00447 | 1.0126E-04 | 1.4868E-04 | -5.5409E-01 | -5.6877E-01 |
| CCNA_00448 | 8.2462E-05 | 1.0013E-04 | -2.8015E-01 | -3.9404E-01 |
| CCNA_00449 | 8.7086E-05 | 7.1468E-05 | 2.8506E-01  | -3.3526E-02 |
| CCNA_00450 | 4.5753E-04 | 6.5368E-05 | 2.8070E+00  | 1.5751E+00  |
| CCNA_00451 | 1.5388E-04 | 1.5804E-04 | -3.8524E-02 | -2.3992E-01 |
| CCNA_00452 | 7.8943E-05 | 6.0015E-05 | 3.9538E-01  | 3.6837E-02  |
| CCNA_00453 | 7.9646E-05 | 1.6300E-04 | -1.0332E+00 | -8.7435E-01 |
| CCNA_00454 | 1.9806E-04 | 8.6260E-05 | 1.1991E+00  | 5.4949E-01  |
| CCNA_00455 | 1.9589E-04 | 8.4644E-05 | 1.2105E+00  | 5.5674E-01  |
| CCNA_00456 | 8.3021E-05 | 8.9931E-05 | -1.1539E-01 | -2.8895E-01 |
| CCNA_00457 | 8.2245E-05 | 1.4830E-04 | -8.5049E-01 | -7.5783E-01 |
| CCNA_00458 | 1.0059E-04 | 1.9238E-04 | -9.3546E-01 | -8.1202E-01 |
| CCNA_00459 | 2.8722E-04 | 1.6590E-04 | 7.9180E-01  | 2.8969E-01  |
| CCNA_00460 | 1.4086E-04 | 1.6243E-04 | -2.0555E-01 | -3.4646E-01 |
| CCNA_04006 | 2.0609E-04 | 1.2760E-04 | 6.9156E-01  | 2.2575E-01  |
| CCNA_00464 | 6.3683E-04 | 2.4717E-04 | 1.3654E+00  | 6.5554E-01  |
| CCNA_00465 | 4.9190E-04 | 1.6260E-04 | 1.5970E+00  | 8.0326E-01  |
| CCNA_00466 | 9.4290E-05 | 6.1018E-05 | 6.2776E-01  | 1.8506E-01  |
| CCNA_00467 | 1.3699E-04 | 7.3100E-05 | 9.0601E-01  | 3.6254E-01  |
| CCNA_00468 | 2.0041E-04 | 1.5999E-04 | 3.2496E-01  | -8.0771E-03 |
| CCNA_00469 | 1.3129E-04 | 7.3738E-05 | 8.3214E-01  | 3.1542E-01  |
| CCNA_04002 | 1.3199E-04 | 7.1119E-05 | 8.9195E-01  | 3.5357E-01  |
| CCNA_00470 | 1.2137E-04 | 1.6010E-04 | -3.9951E-01 | -4.7018E-01 |
| CCNA_00471 | 8.8131E-05 | 1.6116E-04 | -8.7075E-01 | -7.7075E-01 |
| CCNA_00472 | 2.9433E-04 | 1.6274E-04 | 8.5483E-01  | 3.2989E-01  |
| CCNA_00473 | 8.4386E-05 | 1.6134E-04 | -9.3504E-01 | -8.1176E-01 |
| CCNA_00474 | 5.8259E-05 | 8.7387E-05 | -5.8495E-01 | -5.8846E-01 |
| CCNA_00475 | 7.3528E-05 | 6.3769E-05 | 2.0535E-01  | -8.4372E-02 |

|            |            |            |             |             |
|------------|------------|------------|-------------|-------------|
| CCNA_00476 | 5.6687E-05 | 1.1900E-04 | -1.0699E+00 | -8.9776E-01 |
| CCNA_00477 | 9.4656E-05 | 1.6121E-04 | -7.6816E-01 | -7.0532E-01 |
| CCNA_00478 | 2.4845E-04 | 6.8260E-05 | 1.8637E+00  | 9.7338E-01  |
| CCNA_00479 | 2.4711E-04 | 7.1932E-05 | 1.7803E+00  | 9.2020E-01  |
| CCNA_00480 | 1.0647E-04 | 3.8178E-05 | 1.4793E+00  | 7.2821E-01  |
| CCNA_00481 | 1.4294E-04 | 9.0047E-05 | 6.6658E-01  | 2.0982E-01  |
| CCNA_00482 | 9.9506E-05 | 8.0335E-05 | 3.0869E-01  | -1.8459E-02 |
| CCNA_00483 | 1.6108E-04 | 1.8708E-04 | -2.1593E-01 | -3.5308E-01 |
| CCNA_00484 | 9.5881E-05 | 1.8963E-04 | -9.8388E-01 | -8.4291E-01 |
| CCNA_00485 | 7.5697E-05 | 1.5351E-04 | -1.0200E+00 | -8.6596E-01 |
| CCNA_00486 | 6.6236E-05 | 1.5113E-04 | -1.1901E+00 | -9.7444E-01 |
| CCNA_00487 | 6.6624E-05 | 1.4245E-04 | -1.0963E+00 | -9.1460E-01 |
| CCNA_00488 | 8.8857E-05 | 1.6243E-04 | -8.7022E-01 | -7.7042E-01 |
| CCNA_00489 | 1.7568E-04 | 1.6243E-04 | 1.1316E-01  | -1.4317E-01 |
| CCNA_00490 | 1.8800E-04 | 1.8272E-04 | 4.1045E-02  | -1.8917E-01 |
| CCNA_00491 | 2.4511E-04 | 1.7879E-04 | 4.5508E-01  | 7.4915E-02  |
| CCNA_00492 | 2.4319E-04 | 1.7638E-04 | 4.6335E-01  | 8.0195E-02  |
| CCNA_00493 | 6.6578E-05 | 1.0491E-04 | -6.5599E-01 | -6.3377E-01 |
| CCNA_00494 | 9.1294E-05 | 8.9964E-05 | 2.1109E-02  | -2.0189E-01 |
| CCNA_00495 | 4.1501E-04 | 3.2485E-04 | 3.5333E-01  | 1.0014E-02  |
| CCNA_00496 | 1.3668E-04 | 1.2029E-04 | 1.8432E-01  | -9.7783E-02 |
| CCNA_00497 | 2.3365E-04 | 1.5817E-04 | 5.6284E-01  | 1.4365E-01  |
| CCNA_00498 | 5.8944E-05 | 1.6200E-04 | -1.4586E+00 | -1.1457E+00 |
| CCNA_00499 | 6.5413E-05 | 1.0376E-04 | -6.6565E-01 | -6.3993E-01 |
| CCNA_00500 | 5.8560E-05 | 9.4928E-05 | -6.9694E-01 | -6.5989E-01 |
| CCNA_00501 | 1.9265E-04 | 1.6599E-04 | 2.1485E-01  | -7.8310E-02 |
| CCNA_00502 | 2.0444E-04 | 9.6834E-05 | 1.0780E+00  | 4.7225E-01  |
| CCNA_00503 | 1.4269E-04 | 1.6243E-04 | -1.8696E-01 | -3.3460E-01 |
| CCNA_00504 | 5.3439E-04 | 2.5716E-04 | 1.0552E+00  | 4.5768E-01  |
| CCNA_00505 | 5.2524E-04 | 2.5902E-04 | 1.0199E+00  | 4.3518E-01  |
| CCNA_00506 | 1.4314E-04 | 9.9113E-05 | 5.3020E-01  | 1.2283E-01  |
| CCNA_00507 | 1.3926E-04 | 1.4169E-04 | -2.4966E-02 | -2.3128E-01 |
| CCNA_00508 | 1.2394E-04 | 1.5939E-04 | -3.6297E-01 | -4.4687E-01 |
| CCNA_00509 | 7.9965E-05 | 1.1895E-04 | -5.7296E-01 | -5.8081E-01 |
| CCNA_00510 | 6.7961E-05 | 1.3634E-04 | -1.0044E+00 | -8.5601E-01 |
| CCNA_00511 | 6.2366E-05 | 1.3041E-04 | -1.0643E+00 | -8.9418E-01 |
| CCNA_00512 | 1.3269E-04 | 1.6243E-04 | -2.9171E-01 | -4.0141E-01 |
| CCNA_00513 | 8.3738E-05 | 1.6243E-04 | -9.5582E-01 | -8.2501E-01 |
| CCNA_00514 | 8.9042E-05 | 1.5649E-04 | -8.1354E-01 | -7.3426E-01 |
| CCNA_00515 | 1.1644E-04 | 1.5947E-04 | -4.5370E-01 | -5.0474E-01 |
| CCNA_00516 | 7.3006E-05 | 1.4604E-04 | -1.0003E+00 | -8.5339E-01 |
| CCNA_00517 | 6.3646E-05 | 1.2322E-04 | -9.5308E-01 | -8.2327E-01 |
| CCNA_00518 | 1.3279E-04 | 3.1532E-04 | -1.2477E+00 | -1.0112E+00 |
| CCNA_00519 | 1.7558E-04 | 1.9030E-04 | -1.1622E-01 | -2.8948E-01 |
| CCNA_00520 | 7.5017E-05 | 1.6511E-04 | -1.1381E+00 | -9.4130E-01 |
| CCNA_00521 | 8.6096E-05 | 5.1902E-05 | 7.3002E-01  | 2.5028E-01  |
| CCNA_00522 | 6.9371E-05 | 1.6116E-04 | -1.2161E+00 | -9.9100E-01 |
| CCNA_00523 | 1.4071E-04 | 9.8094E-05 | 5.2039E-01  | 1.1657E-01  |
| CCNA_00524 | 8.5278E-05 | 1.5434E-04 | -8.5585E-01 | -7.6125E-01 |
| CCNA_00525 | 3.4729E-04 | 2.5956E-04 | 4.2005E-01  | 5.2576E-02  |
| CCNA_00526 | 3.3149E-04 | 2.4451E-04 | 4.3906E-01  | 6.4702E-02  |
| CCNA_00527 | 2.8898E-04 | 1.4727E-04 | 9.7248E-01  | 4.0494E-01  |
| CCNA_00528 | 6.7933E-05 | 1.3853E-04 | -1.0280E+00 | -8.7103E-01 |

|            |            |            |             |             |
|------------|------------|------------|-------------|-------------|
| CCNA_00529 | 5.3728E-05 | 1.6278E-04 | -1.5992E+00 | -1.2354E+00 |
| CCNA_00530 | 3.5950E-04 | 4.5841E-04 | -3.5066E-01 | -4.3902E-01 |
| CCNA_00531 | 1.0965E-04 | 8.5067E-05 | 3.6612E-01  | 1.8178E-02  |
| CCNA_00532 | 8.9467E-05 | 8.1329E-05 | 1.3752E-01  | -1.2764E-01 |
| CCNA_00533 | 1.2922E-04 | 6.6818E-05 | 9.5134E-01  | 3.9145E-01  |
| CCNA_00534 | 1.3868E-04 | 8.5721E-05 | 6.9392E-01  | 2.2726E-01  |
| CCNA_00535 | 1.0340E-04 | 1.1562E-04 | -1.6127E-01 | -3.1822E-01 |
| CCNA_00536 | 2.1934E-04 | 2.0993E-04 | 6.3254E-02  | -1.7501E-01 |
| CCNA_00537 | 9.5622E-05 | 1.5963E-04 | -7.3928E-01 | -6.8689E-01 |
| CCNA_00538 | 9.5946E-05 | 6.2236E-05 | 6.2435E-01  | 1.8289E-01  |
| CCNA_00539 | 1.9222E-04 | 1.2787E-04 | 5.8800E-01  | 1.5970E-01  |
| CCNA_00540 | 8.2490E-05 | 8.3194E-05 | -1.2323E-02 | -2.2321E-01 |
| CCNA_00541 | 8.0580E-05 | 8.7279E-05 | -1.1527E-01 | -2.8888E-01 |
| CCNA_00542 | 1.4443E-04 | 1.6105E-04 | -1.5722E-01 | -3.1563E-01 |
| CCNA_00543 | 2.5950E-04 | 2.0307E-04 | 3.5370E-01  | 1.0253E-02  |
| CCNA_00544 | 2.5782E-04 | 2.0228E-04 | 3.5000E-01  | 7.8938E-03  |
| CCNA_00545 | 7.4610E-05 | 7.4318E-05 | 5.5843E-03  | -2.1179E-01 |
| CCNA_00546 | 1.4181E-04 | 1.6386E-04 | -2.0850E-01 | -3.4834E-01 |
| CCNA_00547 | 2.3345E-04 | 7.6158E-05 | 1.6159E+00  | 8.1536E-01  |
| CCNA_00548 | 2.7244E-04 | 3.0628E-04 | -1.6894E-01 | -3.2311E-01 |
| CCNA_00549 | 2.7100E-04 | 5.3995E-04 | -9.9455E-01 | -8.4972E-01 |
| CCNA_00550 | 4.4245E-04 | 3.6182E-04 | 2.9020E-01  | -3.0247E-02 |
| CCNA_00551 | 8.1693E-04 | 7.3514E-05 | 3.4740E+00  | 2.0005E+00  |
| CCNA_00552 | 1.0133E-04 | 9.4481E-05 | 1.0095E-01  | -1.5096E-01 |
| CCNA_00553 | 3.0027E-04 | 1.5907E-04 | 9.1656E-01  | 3.6927E-01  |
| CCNA_00554 | 2.9712E-04 | 1.6229E-04 | 8.7238E-01  | 3.4109E-01  |
| CCNA_00555 | 9.4374E-05 | 9.3693E-05 | 1.0380E-02  | -2.0873E-01 |
| CCNA_00556 | 1.0208E-04 | 1.6241E-04 | -6.6992E-01 | -6.4265E-01 |
| CCNA_00557 | 8.2559E-05 | 1.5053E-04 | -8.6651E-01 | -7.6805E-01 |
| CCNA_00558 | 5.4111E-05 | 1.3251E-04 | -1.2921E+00 | -1.0395E+00 |
| CCNA_00559 | 1.0192E-04 | 1.6243E-04 | -6.7242E-01 | -6.4425E-01 |
| CCNA_00560 | 1.0245E-04 | 1.6243E-04 | -6.6484E-01 | -6.3942E-01 |
| CCNA_00561 | 5.6484E-05 | 1.1357E-04 | -1.0077E+00 | -8.5811E-01 |
| CCNA_00562 | 5.8019E-05 | 7.4302E-05 | -3.5692E-01 | -4.4301E-01 |
| CCNA_00563 | 4.6699E-05 | 7.1285E-05 | -6.1024E-01 | -6.0459E-01 |
| CCNA_00564 | 1.1714E-04 | 1.6295E-04 | -4.7616E-01 | -5.1907E-01 |
| CCNA_00565 | 3.5749E-04 | 2.3312E-04 | 6.1678E-01  | 1.7806E-01  |
| CCNA_00566 | 5.7626E-05 | 7.3788E-05 | -3.5672E-01 | -4.4288E-01 |
| CCNA_00567 | 1.0762E-04 | 1.6269E-04 | -5.9618E-01 | -5.9562E-01 |
| CCNA_00568 | 6.7480E-05 | 1.5053E-04 | -1.1575E+00 | -9.5368E-01 |
| CCNA_00569 | 7.7098E-05 | 5.4438E-05 | 5.0196E-01  | 1.0482E-01  |
| CCNA_00570 | 4.8942E-05 | 0.0000E+00 | 1.2528E+01  | 7.7756E+00  |
| CCNA_00571 | 7.4897E-05 | 1.2157E-05 | 2.6222E+00  | 1.4572E+00  |
| CCNA_00572 | 0.0000E+00 | 0.0000E+00 | -8.4168E-01 | -7.5221E-01 |
| CCNA_00573 | 4.4170E-05 | 0.0000E+00 | 1.2380E+01  | 7.6812E+00  |
| CCNA_00574 | 6.0840E-05 | 2.3519E-05 | 1.3708E+00  | 6.5901E-01  |
| CCNA_00575 | 5.4588E-05 | 3.2908E-05 | 7.2990E-01  | 2.5021E-01  |
| CCNA_00576 | 7.5641E-05 | 1.0835E-04 | -5.1852E-01 | -5.4608E-01 |
| CCNA_00577 | 6.0266E-05 | 5.6692E-05 | 8.8110E-02  | -1.5915E-01 |
| CCNA_00578 | 4.9265E-05 | 1.4099E-04 | -1.5169E+00 | -1.1829E+00 |
| CCNA_00579 | 5.1439E-05 | 9.1746E-05 | -8.3479E-01 | -7.4782E-01 |
| CCNA_00580 | 7.2770E-05 | 1.4674E-04 | -1.0118E+00 | -8.6074E-01 |
| CCNA_04005 | 7.5590E-05 | 3.7283E-05 | 1.0194E+00  | 4.3489E-01  |

|            |            |            |             |             |
|------------|------------|------------|-------------|-------------|
| CCNA_00582 | 1.6265E-04 | 1.1489E-04 | 5.0146E-01  | 1.0450E-01  |
| CCNA_00583 | 7.7366E-05 | 3.3248E-05 | 1.2182E+00  | 5.6165E-01  |
| CCNA_00584 | 8.4279E-05 | 7.3912E-05 | 1.8928E-01  | -9.4620E-02 |
| CCNA_00585 | 7.4763E-05 | 4.3905E-05 | 7.6776E-01  | 2.7436E-01  |
| CCNA_00586 | 1.1419E-04 | 1.0627E-04 | 1.0358E-01  | -1.4928E-01 |
| CCNA_00587 | 1.1643E-04 | 1.1331E-04 | 3.9163E-02  | -1.9037E-01 |
| CCNA_00588 | 8.2638E-05 | 1.1378E-04 | -4.6142E-01 | -5.0966E-01 |
| CCNA_00589 | 7.8832E-05 | 3.9861E-05 | 9.8360E-01  | 4.1203E-01  |
| CCNA_00590 | 8.0450E-05 | 8.9185E-05 | -1.4876E-01 | -3.1023E-01 |
| CCNA_00591 | 6.7077E-05 | 7.6879E-05 | -1.9682E-01 | -3.4089E-01 |
| CCNA_00592 | 1.3943E-04 | 1.2394E-04 | 1.6980E-01  | -1.0705E-01 |
| CCNA_00593 | 6.3078E-05 | 1.2487E-04 | -9.8521E-01 | -8.4376E-01 |
| CCNA_00594 | 1.6502E-04 | 1.6204E-04 | 2.6222E-02  | -1.9863E-01 |
| CCNA_00595 | 1.0626E-04 | 8.4677E-05 | 3.2751E-01  | -6.4533E-03 |
| CCNA_00596 | 1.7912E-04 | 1.1120E-04 | 6.8769E-01  | 2.2328E-01  |
| CCNA_00597 | 1.9888E-04 | 1.5861E-04 | 3.2644E-01  | -7.1375E-03 |
| CCNA_00598 | 5.6609E-04 | 1.6276E-04 | 1.7983E+00  | 9.3165E-01  |
| CCNA_00600 | 6.2463E-05 | 1.3413E-04 | -1.1026E+00 | -9.1863E-01 |
| CCNA_00601 | 7.1766E-05 | 9.7638E-05 | -4.4417E-01 | -4.9866E-01 |
| CCNA_00602 | 5.1920E-05 | 1.3084E-04 | -1.3334E+00 | -1.0658E+00 |
| CCNA_00603 | 1.6863E-04 | 9.6536E-05 | 8.0462E-01  | 2.9787E-01  |
| CCNA_00604 | 6.1408E-05 | 1.2326E-04 | -1.0052E+00 | -8.5651E-01 |
| CCNA_00605 | 1.5842E-04 | 1.3765E-04 | 2.0275E-01  | -8.6030E-02 |
| CCNA_00606 | 7.8439E-05 | 5.7728E-05 | 4.4219E-01  | 6.6694E-02  |
| CCNA_00607 | 8.0025E-05 | 4.4319E-05 | 8.5233E-01  | 3.2830E-01  |
| CCNA_00608 | 7.3519E-05 | 2.1812E-05 | 1.7526E+00  | 9.0251E-01  |
| CCNA_00609 | 2.2972E-04 | 1.1787E-04 | 9.6266E-01  | 3.9867E-01  |
| CCNA_00610 | 1.0925E-04 | 1.5712E-04 | -5.2422E-01 | -5.4972E-01 |
| CCNA_00611 | 1.5656E-04 | 1.4645E-04 | 9.6270E-02  | -1.5395E-01 |
| CCNA_00612 | 7.8374E-05 | 1.2180E-04 | -6.3611E-01 | -6.2109E-01 |
| CCNA_00613 | 8.1699E-05 | 9.1671E-05 | -1.6620E-01 | -3.2136E-01 |
| CCNA_00614 | 8.2739E-05 | 1.4429E-04 | -8.0237E-01 | -7.2714E-01 |
| CCNA_00615 | 2.6830E-04 | 7.5454E-05 | 1.8300E+00  | 9.5192E-01  |
| CCNA_00616 | 6.9621E-05 | 9.6702E-05 | -4.7405E-01 | -5.1772E-01 |
| CCNA_00617 | 8.1065E-05 | 5.0103E-05 | 6.9402E-01  | 2.2732E-01  |
| CCNA_00618 | 7.3366E-05 | 1.5590E-04 | -1.0874E+00 | -9.0893E-01 |
| CCNA_00619 | 5.7496E-05 | 1.4211E-04 | -1.3054E+00 | -1.0480E+00 |
| CCNA_00620 | 6.5501E-05 | 1.4041E-04 | -1.1000E+00 | -9.1699E-01 |
| CCNA_00621 | 2.4392E-04 | 1.2587E-04 | 9.5437E-01  | 3.9339E-01  |
| CCNA_00622 | 2.1387E-04 | 1.7833E-04 | 2.6213E-01  | -4.8156E-02 |
| CCNA_00623 | 2.0396E-04 | 1.6065E-04 | 3.4430E-01  | 4.2599E-03  |
| CCNA_00624 | 3.7811E-04 | 1.6250E-04 | 1.2183E+00  | 5.6174E-01  |
| CCNA_00625 | 3.9946E-04 | 1.6120E-04 | 1.3092E+00  | 6.1968E-01  |
| CCNA_00626 | 1.0172E-04 | 8.0824E-05 | 3.3163E-01  | -3.8261E-03 |
| CCNA_00627 | 9.8780E-05 | 6.6959E-05 | 5.6083E-01  | 1.4237E-01  |
| CCNA_00628 | 7.9160E-05 | 8.7793E-05 | -1.4938E-01 | -3.1063E-01 |
| CCNA_00629 | 5.3182E-05 | 2.1911E-05 | 1.2789E+00  | 6.0036E-01  |
| CCNA_00630 | 8.0631E-05 | 9.3644E-05 | -2.1590E-01 | -3.5306E-01 |
| CCNA_00631 | 8.4705E-05 | 1.3766E-04 | -7.0056E-01 | -6.6220E-01 |
| CCNA_00632 | 1.2890E-04 | 1.6223E-04 | -3.3176E-01 | -4.2696E-01 |
| CCNA_00633 | 8.8663E-05 | 6.6595E-05 | 4.1282E-01  | 4.7961E-02  |
| CCNA_00634 | 8.9555E-05 | 1.2279E-04 | -4.5536E-01 | -5.0580E-01 |
| CCNA_00635 | 1.0355E-04 | 1.3312E-04 | -3.6249E-01 | -4.4656E-01 |

|            |            |            |             |             |
|------------|------------|------------|-------------|-------------|
| CCNA_00636 | 1.1939E-04 | 8.7578E-05 | 4.4703E-01  | 6.9781E-02  |
| CCNA_00637 | 7.4629E-05 | 5.9286E-05 | 3.3194E-01  | -3.6281E-03 |
| CCNA_00638 | 1.0567E-04 | 1.6243E-04 | -6.2022E-01 | -6.1096E-01 |
| CCNA_00639 | 2.8456E-04 | 1.0873E-04 | 1.3879E+00  | 6.6994E-01  |
| CCNA_00640 | 1.6874E-04 | 5.6377E-05 | 1.5815E+00  | 7.9339E-01  |
| CCNA_00641 | 2.4155E-04 | 1.0609E-04 | 1.1869E+00  | 5.4171E-01  |
| CCNA_00642 | 2.2995E-04 | 7.5180E-05 | 1.6128E+00  | 8.1333E-01  |
| CCNA_00643 | 1.3447E-04 | 1.6269E-04 | -2.7488E-01 | -3.9068E-01 |
| CCNA_00644 | 6.9732E-05 | 1.1202E-04 | -6.8394E-01 | -6.5159E-01 |
| CCNA_00645 | 7.0879E-05 | 1.5348E-04 | -1.1147E+00 | -9.2633E-01 |
| CCNA_00646 | 5.0722E-05 | 1.1778E-04 | -1.2153E+00 | -9.9054E-01 |
| CCNA_00647 | 6.8141E-05 | 4.3689E-05 | 6.4107E-01  | 1.9355E-01  |
| CCNA_00648 | 6.6472E-05 | 9.2218E-05 | -4.7234E-01 | -5.1663E-01 |
| CCNA_00649 | 5.7704E-05 | 1.1841E-04 | -1.0371E+00 | -8.7684E-01 |
| CCNA_00650 | 6.6476E-05 | 5.9294E-05 | 1.6486E-01  | -1.1020E-01 |
| CCNA_00651 | 6.5561E-05 | 8.3741E-05 | -3.5314E-01 | -4.4060E-01 |
| CCNA_00652 | 6.6282E-05 | 1.4931E-04 | -1.1716E+00 | -9.6263E-01 |
| CCNA_00653 | 6.8673E-05 | 4.1095E-05 | 7.4057E-01  | 2.5701E-01  |
| CCNA_00654 | 5.8597E-05 | 7.6523E-05 | -3.8511E-01 | -4.6099E-01 |
| CCNA_00655 | 1.6368E-04 | 1.6383E-04 | -1.3569E-03 | -2.1622E-01 |
| CCNA_00656 | 1.8564E-04 | 1.8323E-04 | 1.8848E-02  | -2.0333E-01 |
| CCNA_00657 | 7.7422E-05 | 1.2761E-04 | -7.2097E-01 | -6.7521E-01 |
| CCNA_00658 | 7.7981E-05 | 3.5452E-05 | 1.1370E+00  | 5.0988E-01  |
| CCNA_00659 | 4.1437E-05 | 1.0821E-04 | -1.3848E+00 | -1.0987E+00 |
| CCNA_00660 | 4.0508E-04 | 2.6728E-04 | 5.9981E-01  | 1.6723E-01  |
| CCNA_00661 | 1.3089E-04 | 1.4931E-04 | -1.9001E-01 | -3.3655E-01 |
| CCNA_00662 | 8.1264E-05 | 8.7263E-05 | -1.0280E-01 | -2.8092E-01 |
| CCNA_00663 | 7.6099E-05 | 1.6013E-04 | -1.0733E+00 | -8.9994E-01 |
| CCNA_00664 | 9.9155E-05 | 6.4390E-05 | 6.2272E-01  | 1.8185E-01  |
| CCNA_00665 | 9.6707E-04 | 1.6010E-04 | 2.5946E+00  | 1.4396E+00  |
| CCNA_00666 | 6.7424E-05 | 9.1298E-05 | -4.3735E-01 | -4.9431E-01 |
| CCNA_00667 | 5.9961E-05 | 3.3712E-05 | 8.3053E-01  | 3.1440E-01  |
| CCNA_00668 | 5.4287E-05 | 6.5476E-05 | -2.7041E-01 | -3.8783E-01 |
| CCNA_00669 | 7.6034E-05 | 1.3631E-04 | -8.4221E-01 | -7.5255E-01 |
| CCNA_00670 | 8.8251E-05 | 4.3739E-05 | 1.0125E+00  | 4.3046E-01  |
| CCNA_00671 | 7.3306E-05 | 1.4288E-04 | -9.6276E-01 | -8.2944E-01 |
| CCNA_00672 | 9.9150E-05 | 1.1388E-04 | -1.9987E-01 | -3.4284E-01 |
| CCNA_00673 | 9.9169E-05 | 1.5241E-04 | -6.1998E-01 | -6.1080E-01 |
| CCNA_00674 | 9.6912E-05 | 1.3453E-04 | -4.7322E-01 | -5.1719E-01 |
| CCNA_00675 | 1.4387E-04 | 7.0829E-05 | 1.0223E+00  | 4.3670E-01  |
| CCNA_00676 | 1.4608E-04 | 1.6022E-04 | -1.3334E-01 | -3.0040E-01 |
| CCNA_00677 | 8.5088E-05 | 8.7039E-05 | -3.2756E-02 | -2.3624E-01 |
| CCNA_00678 | 8.0071E-05 | 1.6756E-04 | -1.0653E+00 | -8.9483E-01 |
| CCNA_00679 | 4.7886E-04 | 7.8352E-04 | -7.1037E-01 | -6.6846E-01 |
| CCNA_00680 | 5.2581E-05 | 4.8827E-05 | 1.0673E-01  | -1.4727E-01 |
| CCNA_00681 | 7.2594E-05 | 1.4603E-04 | -1.0084E+00 | -8.5854E-01 |
| CCNA_00682 | 6.3711E-05 | 8.7602E-05 | -4.5946E-01 | -5.0841E-01 |
| CCNA_00683 | 7.2178E-05 | 4.5529E-05 | 6.6460E-01  | 2.0856E-01  |
| CCNA_00684 | 8.4885E-05 | 6.3935E-05 | 4.0880E-01  | 4.5401E-02  |
| CCNA_00685 | 2.5453E-04 | 1.5295E-04 | 7.3466E-01  | 2.5325E-01  |
| CCNA_00686 | 2.7039E-04 | 1.5439E-04 | 8.0844E-01  | 3.0030E-01  |
| CCNA_00687 | 1.2495E-04 | 1.2419E-04 | 8.7965E-03  | -2.0974E-01 |
| CCNA_00688 | 8.1893E-05 | 8.9682E-05 | -1.3113E-01 | -2.9899E-01 |

|            |            |            |             |             |
|------------|------------|------------|-------------|-------------|
| CCNA_00689 | 8.2342E-05 | 9.4215E-05 | -1.9439E-01 | -3.3934E-01 |
| CCNA_00690 | 2.9600E-04 | 1.3230E-04 | 1.1617E+00  | 5.2562E-01  |
| CCNA_00691 | 1.3613E-04 | 1.6243E-04 | -2.5478E-01 | -3.7786E-01 |
| CCNA_00692 | 1.3595E-04 | 1.5928E-04 | -2.2850E-01 | -3.6110E-01 |
| CCNA_00693 | 7.8004E-05 | 8.8431E-05 | -1.8105E-01 | -3.3083E-01 |
| CCNA_00694 | 6.4701E-05 | 2.6552E-05 | 1.2846E+00  | 6.0404E-01  |
| CCNA_00695 | 1.0031E-04 | 8.2663E-05 | 2.7908E-01  | -3.7341E-02 |
| CCNA_00696 | 9.9506E-05 | 4.5256E-05 | 1.1365E+00  | 5.0955E-01  |
| CCNA_00697 | 1.3210E-03 | 1.5595E-04 | 3.0824E+00  | 1.7507E+00  |
| CCNA_00698 | 2.3278E-04 | 2.4605E-04 | -7.9991E-02 | -2.6637E-01 |
| CCNA_00699 | 2.9284E-04 | 3.2485E-04 | -1.4968E-01 | -3.1082E-01 |
| CCNA_00700 | 7.5688E-05 | 9.2077E-05 | -2.8283E-01 | -3.9575E-01 |
| CCNA_00701 | 8.1754E-05 | 9.5160E-05 | -2.1911E-01 | -3.5511E-01 |
| CCNA_00702 | 9.3842E-05 | 7.2744E-05 | 3.6732E-01  | 1.8938E-02  |
| CCNA_00703 | 7.9244E-05 | 1.2873E-04 | -7.0000E-01 | -6.6184E-01 |
| CCNA_00704 | 1.0094E-04 | 8.0807E-05 | 3.2086E-01  | -1.0692E-02 |
| CCNA_00705 | 8.8922E-05 | 1.5319E-04 | -7.8476E-01 | -7.1590E-01 |
| CCNA_00706 | 7.7736E-05 | 1.6219E-04 | -1.0610E+00 | -8.9209E-01 |
| CCNA_00707 | 6.0923E-05 | 8.6111E-05 | -4.9924E-01 | -5.3379E-01 |
| CCNA_00708 | 6.9218E-05 | 5.0021E-05 | 4.6849E-01  | 8.3472E-02  |
| CCNA_00709 | 8.0645E-05 | 3.3355E-05 | 1.2734E+00  | 5.9687E-01  |
| CCNA_00710 | 7.1970E-05 | 1.2466E-04 | -7.9256E-01 | -7.2088E-01 |
| CCNA_00711 | 7.8934E-05 | 1.0293E-04 | -3.8303E-01 | -4.5966E-01 |
| CCNA_00712 | 9.2260E-05 | 1.6243E-04 | -8.1600E-01 | -7.3583E-01 |
| CCNA_00713 | 7.5424E-05 | 6.6810E-05 | 1.7487E-01  | -1.0382E-01 |
| CCNA_00714 | 1.1531E-04 | 1.6665E-05 | 2.7900E+00  | 1.5642E+00  |
| CCNA_00715 | 8.6402E-05 | 6.1863E-05 | 4.8187E-01  | 9.2006E-02  |
| CCNA_00716 | 1.6835E-04 | 8.6053E-05 | 9.6811E-01  | 4.0215E-01  |
| CCNA_00717 | 1.9098E-04 | 6.4515E-05 | 1.5655E+00  | 7.8322E-01  |
| CCNA_00718 | 1.9346E-04 | 1.3877E-04 | 4.7932E-01  | 9.0377E-02  |
| CCNA_00719 | 1.8747E-04 | 3.4797E-05 | 2.4293E+00  | 1.3342E+00  |
| CCNA_00720 | 5.1268E-05 | 8.8116E-05 | -7.8136E-01 | -7.1374E-01 |
| CCNA_00721 | 9.1729E-05 | 8.0857E-05 | 1.8193E-01  | -9.9309E-02 |
| CCNA_00722 | 1.2574E-04 | 1.5040E-04 | -2.5841E-01 | -3.8018E-01 |
| CCNA_00723 | 1.2595E-04 | 1.3819E-04 | -1.3378E-01 | -3.0068E-01 |
| CCNA_00724 | 1.1170E-04 | 1.3075E-04 | -2.2730E-01 | -3.6034E-01 |
| CCNA_00725 | 4.2916E-05 | 1.0771E-04 | -1.3275E+00 | -1.0621E+00 |
| CCNA_00726 | 1.0443E-04 | 1.6273E-04 | -6.3996E-01 | -6.2355E-01 |
| CCNA_00727 | 9.6755E-05 | 1.4065E-04 | -5.3969E-01 | -5.5959E-01 |
| CCNA_00728 | 1.2696E-04 | 1.5347E-04 | -2.7359E-01 | -3.8986E-01 |
| CCNA_00729 | 1.4553E-04 | 1.6054E-04 | -1.4164E-01 | -3.0570E-01 |
| CCNA_00730 | 7.8083E-05 | 4.1095E-05 | 9.2582E-01  | 3.7518E-01  |
| CCNA_00731 | 1.7186E-04 | 4.6151E-05 | 1.8966E+00  | 9.9435E-01  |
| CCNA_00732 | 1.4270E-04 | 7.5371E-05 | 9.2085E-01  | 3.7200E-01  |
| CCNA_00733 | 8.0196E-05 | 1.3138E-04 | -7.1218E-01 | -6.6961E-01 |
| CCNA_00734 | 8.1662E-05 | 1.2174E-05 | 2.7450E+00  | 1.5355E+00  |
| CCNA_00735 | 3.1439E-04 | 1.6277E-04 | 9.4972E-01  | 3.9042E-01  |
| CCNA_00736 | 7.1327E-05 | 1.0943E-04 | -6.1751E-01 | -6.0922E-01 |
| CCNA_00737 | 1.4044E-04 | 1.6276E-04 | -2.1276E-01 | -3.5106E-01 |
| CCNA_00738 | 6.1501E-05 | 9.9014E-05 | -6.8703E-01 | -6.5357E-01 |
| CCNA_00739 | 4.0091E-05 | 7.5222E-05 | -9.0786E-01 | -7.9442E-01 |
| CCNA_00740 | 7.9507E-05 | 2.2963E-05 | 1.7913E+00  | 9.2722E-01  |
| CCNA_00741 | 2.6222E-04 | 1.4223E-04 | 8.8249E-01  | 3.4754E-01  |

|            |            |            |             |             |
|------------|------------|------------|-------------|-------------|
| CCNA_00742 | 7.9410E-05 | 8.0882E-05 | -2.6554E-02 | -2.3229E-01 |
| CCNA_00743 | 9.7694E-05 | 5.9277E-05 | 7.2065E-01  | 2.4431E-01  |
| CCNA_00744 | 9.6219E-05 | 0.0000E+00 | 1.3503E+01  | 8.3976E+00  |
| CCNA_00745 | 5.3820E-05 | 1.1169E-04 | -1.0533E+00 | -8.8719E-01 |
| CCNA_00746 | 8.3983E-05 | 1.4006E-04 | -7.3787E-01 | -6.8600E-01 |
| CCNA_00747 | 3.4224E-04 | 1.4311E-04 | 1.2578E+00  | 5.8695E-01  |
| CCNA_00748 | 3.3216E-04 | 1.3816E-04 | 1.2654E+00  | 5.9179E-01  |
| CCNA_00749 | 1.0648E-04 | 9.9436E-05 | 9.8675E-02  | -1.5241E-01 |
| CCNA_00750 | 6.8307E-05 | 1.1242E-04 | -7.1882E-01 | -6.7384E-01 |
| CCNA_00751 | 7.7625E-05 | 1.5849E-04 | -1.0298E+00 | -8.7219E-01 |
| CCNA_00752 | 2.1274E-04 | 8.3020E-05 | 1.3574E+00  | 6.5048E-01  |
| CCNA_00753 | 7.8411E-05 | 1.1204E-05 | 2.8061E+00  | 1.5745E+00  |
| CCNA_00754 | 7.9553E-04 | 6.4432E-05 | 3.6259E+00  | 2.0974E+00  |
| CCNA_00755 | 7.2802E-05 | 1.1169E-04 | -6.1750E-01 | -6.0922E-01 |
| CCNA_00756 | 8.2980E-05 | 1.6243E-04 | -9.6894E-01 | -8.3339E-01 |
| CCNA_00757 | 1.3704E-04 | 1.4564E-04 | -8.7887E-02 | -2.7141E-01 |
| CCNA_00758 | 1.2530E-04 | 1.6243E-04 | -3.7447E-01 | -4.5421E-01 |
| CCNA_00759 | 1.2279E-04 | 8.3683E-05 | 5.5315E-01  | 1.3747E-01  |
| CCNA_00760 | 1.6309E-04 | 7.8313E-05 | 1.0583E+00  | 4.5965E-01  |
| CCNA_00761 | 1.3195E-04 | 1.6275E-04 | -3.0264E-01 | -4.0839E-01 |
| CCNA_00762 | 5.9989E-05 | 5.9700E-05 | 6.8733E-03  | -2.1097E-01 |
| CCNA_00763 | 7.0957E-05 | 1.4810E-04 | -1.0615E+00 | -8.9243E-01 |
| CCNA_00764 | 2.2104E-04 | 2.3931E-04 | -1.1460E-01 | -2.8845E-01 |
| CCNA_00765 | 2.1997E-04 | 2.3559E-04 | -9.8981E-02 | -2.7849E-01 |
| CCNA_00766 | 2.9586E-04 | 1.2760E-04 | 1.2131E+00  | 5.5845E-01  |
| CCNA_00767 | 2.4149E-04 | 2.6413E-04 | -1.2929E-01 | -2.9782E-01 |
| CCNA_00768 | 1.8588E-04 | 2.0143E-04 | -1.1589E-01 | -2.8927E-01 |
| CCNA_00769 | 8.2901E-05 | 9.8806E-05 | -2.5325E-01 | -3.7689E-01 |
| CCNA_00770 | 6.9866E-05 | 4.7162E-05 | 5.6682E-01  | 1.4619E-01  |
| CCNA_00771 | 5.8953E-05 | 3.2452E-05 | 8.6100E-01  | 3.3383E-01  |
| CCNA_00772 | 6.3244E-05 | 8.9989E-05 | -5.0885E-01 | -5.3992E-01 |
| CCNA_00773 | 6.0969E-05 | 4.3333E-05 | 4.9244E-01  | 9.8750E-02  |
| CCNA_00774 | 6.5367E-05 | 1.3283E-04 | -1.0230E+00 | -8.6785E-01 |
| CCNA_00775 | 4.3712E-05 | 1.1486E-05 | 1.9273E+00  | 1.0139E+00  |
| CCNA_00776 | 1.0133E-04 | 1.0522E-04 | -5.4428E-02 | -2.5007E-01 |
| CCNA_00777 | 1.5213E-04 | 1.0249E-04 | 5.6968E-01  | 1.4801E-01  |
| CCNA_00778 | 3.5207E-04 | 3.2475E-04 | 1.1649E-01  | -1.4105E-01 |
| CCNA_00779 | 2.8860E-04 | 1.5256E-04 | 9.1965E-01  | 3.7124E-01  |
| CCNA_00780 | 2.9405E-04 | 2.7920E-04 | 7.4737E-02  | -1.6768E-01 |
| CCNA_00781 | 2.7507E-04 | 2.5032E-04 | 1.3601E-01  | -1.2860E-01 |
| CCNA_00782 | 3.8310E-04 | 1.7333E-04 | 1.1441E+00  | 5.1443E-01  |
| CCNA_00783 | 1.3482E-04 | 1.2695E-04 | 8.6697E-02  | -1.6005E-01 |
| CCNA_00784 | 1.1730E-04 | 9.7373E-05 | 2.6860E-01  | -4.4025E-02 |
| CCNA_00785 | 4.0179E-05 | 1.9226E-05 | 1.0629E+00  | 4.6263E-01  |
| CCNA_04003 | 1.5541E-04 | 1.2298E-04 | 3.3758E-01  | -2.9089E-05 |
| CCNA_00787 | 2.3044E-04 | 2.2100E-04 | 6.0345E-02  | -1.7686E-01 |
| CCNA_00788 | 2.5251E-04 | 1.7472E-04 | 5.3122E-01  | 1.2348E-01  |
| CCNA_00789 | 1.4127E-03 | 1.6284E-04 | 3.1168E+00  | 1.7727E+00  |
| CCNA_00790 | 1.3149E-03 | 1.6479E-04 | 2.9962E+00  | 1.6957E+00  |
| CCNA_00791 | 6.5667E-05 | 9.3122E-05 | -5.0397E-01 | -5.3681E-01 |
| CCNA_00792 | 2.8683E-04 | 1.4261E-04 | 1.0081E+00  | 4.2763E-01  |
| CCNA_00793 | 4.9551E-04 | 9.3287E-05 | 2.4090E+00  | 1.3212E+00  |
| CCNA_00794 | 6.8936E-05 | 3.0969E-05 | 1.1542E+00  | 5.2082E-01  |

|            |            |            |             |             |
|------------|------------|------------|-------------|-------------|
| CCNA_00795 | 2.0202E-04 | 5.3277E-05 | 1.9227E+00  | 1.0110E+00  |
| CCNA_00796 | 8.3871E-04 | 6.9860E-05 | 3.5855E+00  | 2.0716E+00  |
| CCNA_00797 | 4.2846E-04 | 1.3795E-04 | 1.6350E+00  | 8.2750E-01  |
| CCNA_00798 | 7.2215E-05 | 4.0358E-05 | 8.3924E-01  | 3.1995E-01  |
| CCNA_00799 | 1.1311E-03 | 1.2152E-04 | 3.2183E+00  | 1.8374E+00  |
| CCNA_00800 | 1.1697E-03 | 9.4406E-05 | 3.6310E+00  | 2.1006E+00  |
| CCNA_00801 | 1.0028E-04 | 1.4008E-04 | -4.8223E-01 | -5.2294E-01 |
| CCNA_00802 | 1.2665E-04 | 9.4000E-05 | 4.3009E-01  | 5.8980E-02  |
| CCNA_00803 | 2.9007E-04 | 2.5327E-04 | 1.9571E-01  | -9.0518E-02 |
| CCNA_00804 | 7.0985E-05 | 1.4487E-04 | -1.0292E+00 | -8.7182E-01 |
| CCNA_00805 | 5.8430E-05 | 1.0220E-04 | -8.0655E-01 | -7.2980E-01 |
| CCNA_00806 | 1.0397E-04 | 1.6258E-04 | -6.4497E-01 | -6.2674E-01 |
| CCNA_00807 | 2.2233E-04 | 1.5902E-04 | 4.8343E-01  | 9.3002E-02  |
| CCNA_00808 | 2.8131E-04 | 2.0409E-04 | 4.6289E-01  | 7.9898E-02  |
| CCNA_00809 | 4.6089E-05 | 3.8071E-05 | 2.7556E-01  | -3.9588E-02 |
| CCNA_00810 | 6.5084E-05 | 1.0881E-04 | -7.4142E-01 | -6.8826E-01 |
| CCNA_00811 | 9.8725E-05 | 1.2122E-04 | -2.9621E-01 | -4.0428E-01 |
| CCNA_00812 | 5.4278E-05 | 4.3010E-06 | 3.6550E+00  | 2.1159E+00  |
| CCNA_00813 | 6.0881E-05 | 5.6485E-05 | 1.0804E-01  | -1.4644E-01 |
| CCNA_00814 | 1.2710E-04 | 1.4322E-04 | -1.7228E-01 | -3.2524E-01 |
| CCNA_00815 | 5.4754E-05 | 2.7074E-05 | 1.0158E+00  | 4.3254E-01  |
| CCNA_00816 | 5.3996E-05 | 4.4253E-05 | 2.8693E-01  | -3.2334E-02 |
| CCNA_00817 | 1.0473E-04 | 5.2184E-05 | 1.0048E+00  | 4.2555E-01  |
| CCNA_00818 | 5.2428E-05 | 7.0481E-05 | -4.2694E-01 | -4.8767E-01 |
| CCNA_00819 | 5.3321E-05 | 7.5768E-05 | -5.0693E-01 | -5.3870E-01 |
| CCNA_00820 | 5.7774E-05 | 3.1267E-05 | 8.8550E-01  | 3.4946E-01  |
| CCNA_00821 | 8.8117E-05 | 1.2489E-04 | -5.0313E-01 | -5.3627E-01 |
| CCNA_00822 | 8.1232E-05 | 1.4917E-04 | -8.7681E-01 | -7.7462E-01 |
| CCNA_00823 | 9.8434E-05 | 1.0699E-04 | -1.2024E-01 | -2.9205E-01 |
| CCNA_00824 | 1.0789E-04 | 1.3757E-04 | -3.5073E-01 | -4.3906E-01 |
| CCNA_00825 | 6.1112E-05 | 1.0864E-04 | -8.3006E-01 | -7.4480E-01 |
| CCNA_00826 | 1.6000E-04 | 1.4065E-04 | 1.8598E-01  | -9.6728E-02 |
| CCNA_00827 | 2.1242E-04 | 8.6741E-05 | 1.2921E+00  | 6.0877E-01  |
| CCNA_00828 | 7.2895E-05 | 9.4307E-05 | -3.7158E-01 | -4.5236E-01 |
| CCNA_00829 | 7.4379E-05 | 5.2788E-05 | 4.9453E-01  | 1.0008E-01  |
| CCNA_00830 | 7.5979E-05 | 9.1895E-05 | -2.7443E-01 | -3.9040E-01 |
| CCNA_00831 | 5.6946E-05 | 7.2031E-05 | -3.3907E-01 | -4.3163E-01 |
| CCNA_00832 | 9.7157E-05 | 3.6786E-05 | 1.4009E+00  | 6.7820E-01  |
| CCNA_00833 | 1.0155E-04 | 6.7705E-05 | 5.8468E-01  | 1.5758E-01  |
| CCNA_00834 | 1.3883E-04 | 3.4043E-05 | 2.0276E+00  | 1.0780E+00  |
| CCNA_00835 | 8.0242E-05 | 5.1380E-07 | 7.2640E+00  | 4.4179E+00  |
| CCNA_00836 | 1.0213E-04 | 5.0642E-05 | 1.0119E+00  | 4.3006E-01  |
| CCNA_00837 | 4.1127E-05 | 0.0000E+00 | 1.2277E+01  | 7.6155E+00  |
| CCNA_00838 | 1.5682E-04 | 1.8596E-05 | 3.0755E+00  | 1.7463E+00  |
| CCNA_00839 | 1.5697E-04 | 2.3154E-05 | 2.7607E+00  | 1.5455E+00  |
| CCNA_00840 | 4.3457E-05 | 9.2160E-05 | -1.0845E+00 | -9.0710E-01 |
| CCNA_00841 | 5.9591E-05 | 1.1400E-04 | -9.3592E-01 | -8.1232E-01 |
| CCNA_00842 | 1.5341E-04 | 1.5143E-04 | 1.8668E-02  | -2.0344E-01 |
| CCNA_00843 | 6.6837E-05 | 5.3112E-05 | 3.3149E-01  | -3.9116E-03 |
| CCNA_00844 | 1.0378E-04 | 1.4095E-04 | -4.4167E-01 | -4.9707E-01 |
| CCNA_00845 | 1.0184E-04 | 9.8848E-05 | 4.2924E-02  | -1.8797E-01 |
| CCNA_00846 | 4.6050E-04 | 1.7076E-04 | 1.4312E+00  | 6.9750E-01  |
| CCNA_00847 | 8.5607E-04 | 2.8073E-04 | 1.6085E+00  | 8.1062E-01  |



|            |            |            |             |             |
|------------|------------|------------|-------------|-------------|
| CCNA_00848 | 5.5272E-05 | 7.4525E-05 | -4.3122E-01 | -4.9040E-01 |
| CCNA_00849 | 6.1390E-05 | 1.4447E-04 | -1.2347E+00 | -1.0029E+00 |
| CCNA_00850 | 6.4035E-05 | 7.4658E-05 | -2.2150E-01 | -3.5663E-01 |
| CCNA_00851 | 1.3863E-04 | 1.7189E-04 | -3.1026E-01 | -4.1325E-01 |
| CCNA_00852 | 1.3243E-04 | 1.7025E-04 | -3.6244E-01 | -4.4653E-01 |
| CCNA_00853 | 7.3964E-04 | 1.1607E-04 | 2.6718E+00  | 1.4888E+00  |
| CCNA_00854 | 7.3433E-04 | 7.6995E-05 | 3.2534E+00  | 1.8598E+00  |
| CCNA_00855 | 4.5192E-05 | 1.2143E-04 | -1.4260E+00 | -1.1249E+00 |
| CCNA_00856 | 4.9936E-05 | 1.2789E-04 | -1.3568E+00 | -1.0808E+00 |
| CCNA_00857 | 1.9638E-04 | 1.0639E-04 | 8.8420E-01  | 3.4863E-01  |
| CCNA_00858 | 1.7759E-04 | 1.1831E-04 | 5.8586E-01  | 1.5833E-01  |
| CCNA_00859 | 3.6297E-04 | 1.5060E-04 | 1.2690E+00  | 5.9410E-01  |
| CCNA_00860 | 5.2040E-04 | 2.1358E-04 | 1.2848E+00  | 6.0414E-01  |
| CCNA_00861 | 1.0649E-04 | 3.9098E-05 | 1.4453E+00  | 7.0651E-01  |
| CCNA_00862 | 6.9200E-05 | 1.0307E-04 | -5.7475E-01 | -5.8195E-01 |
| CCNA_00863 | 1.0445E-04 | 5.2109E-05 | 1.0030E+00  | 4.2443E-01  |
| CCNA_00864 | 1.4303E-04 | 1.2738E-04 | 1.6712E-01  | -1.0876E-01 |
| CCNA_00865 | 6.2342E-05 | 1.2043E-04 | -9.4987E-01 | -8.2122E-01 |
| CCNA_00866 | 4.7405E-04 | 5.9683E-05 | 2.9895E+00  | 1.6914E+00  |
| CCNA_00867 | 4.7626E-04 | 5.7728E-05 | 3.0442E+00  | 1.7264E+00  |
| CCNA_04017 | 5.2937E-05 | 3.7573E-05 | 4.9437E-01  | 9.9977E-02  |
| CCNA_00869 | 2.8544E-04 | 4.5363E-05 | 2.6534E+00  | 1.4771E+00  |
| CCNA_00870 | 5.8865E-05 | 9.4290E-05 | -6.7971E-01 | -6.4890E-01 |
| CCNA_00871 | 9.7250E-05 | 6.7208E-05 | 5.3295E-01  | 1.2459E-01  |
| CCNA_00872 | 1.0002E-04 | 9.7323E-05 | 3.9374E-02  | -1.9024E-01 |
| CCNA_00873 | 6.4049E-05 | 5.2921E-05 | 2.7520E-01  | -3.9815E-02 |
| CCNA_00874 | 6.0955E-05 | 3.9728E-05 | 6.1740E-01  | 1.7845E-01  |
| CCNA_00875 | 9.3689E-05 | 2.4140E-05 | 1.9560E+00  | 1.0323E+00  |
| CCNA_00876 | 5.9910E-05 | 1.4689E-04 | -1.2938E+00 | -1.0406E+00 |
| CCNA_00877 | 1.6074E-04 | 2.9326E-04 | -8.6747E-01 | -7.6866E-01 |
| CCNA_00878 | 1.5483E-04 | 2.6848E-04 | -7.9407E-01 | -7.2184E-01 |
| CCNA_00879 | 3.4491E-05 | 7.0108E-05 | -1.0233E+00 | -8.6808E-01 |
| CCNA_00880 | 5.3085E-05 | 1.5803E-05 | 1.7474E+00  | 8.9924E-01  |
| CCNA_00881 | 5.8481E-05 | 4.5396E-05 | 3.6525E-01  | 1.7617E-02  |
| CCNA_00882 | 4.9196E-05 | 1.1187E-04 | -1.1851E+00 | -9.7128E-01 |
| CCNA_00883 | 8.0848E-05 | 1.2686E-04 | -6.4994E-01 | -6.2991E-01 |
| CCNA_00884 | 7.9461E-05 | 9.4307E-05 | -2.4716E-01 | -3.7300E-01 |
| CCNA_00885 | 1.7104E-04 | 1.2685E-04 | 4.3113E-01  | 5.9642E-02  |
| CCNA_00886 | 1.7026E-04 | 1.2796E-04 | 4.1203E-01  | 4.7458E-02  |
| CCNA_00887 | 6.3938E-05 | 1.2326E-04 | -9.4698E-01 | -8.1937E-01 |
| CCNA_00888 | 9.4679E-05 | 5.2084E-05 | 8.6204E-01  | 3.3449E-01  |
| CCNA_00889 | 2.9064E-04 | 1.1873E-04 | 1.2915E+00  | 6.0840E-01  |
| CCNA_00890 | 6.4576E-05 | 5.8208E-05 | 1.4967E-01  | -1.1989E-01 |
| CCNA_00891 | 6.4266E-05 | 3.5510E-05 | 8.5560E-01  | 3.3038E-01  |
| CCNA_00892 | 2.1788E-04 | 1.1693E-04 | 8.9781E-01  | 3.5731E-01  |
| CCNA_00893 | 1.8637E-04 | 1.6272E-04 | 1.9574E-01  | -9.0499E-02 |
| CCNA_00894 | 1.6778E-04 | 1.3989E-04 | 2.6225E-01  | -4.8075E-02 |
| CCNA_00895 | 8.2295E-05 | 9.4157E-05 | -1.9431E-01 | -3.3929E-01 |
| CCNA_00896 | 8.4117E-05 | 1.1632E-04 | -4.6761E-01 | -5.1361E-01 |
| CCNA_00897 | 9.9895E-05 | 1.6115E-04 | -6.8993E-01 | -6.5542E-01 |
| CCNA_00898 | 8.8506E-05 | 6.5302E-05 | 4.3854E-01  | 6.4365E-02  |
| CCNA_00899 | 9.5123E-05 | 1.3151E-04 | -4.6730E-01 | -5.1341E-01 |
| CCNA_00900 | 9.5141E-05 | 1.3190E-04 | -4.7138E-01 | -5.1602E-01 |

|            |            |            |             |             |
|------------|------------|------------|-------------|-------------|
| CCNA_00901 | 1.9182E-04 | 5.3833E-05 | 1.8330E+00  | 9.5381E-01  |
| CCNA_00902 | 1.6082E-04 | 9.6710E-06 | 4.0544E+00  | 2.3707E+00  |
| CCNA_00903 | 1.0291E-04 | 1.0282E-04 | 1.3089E-03  | -2.1452E-01 |
| CCNA_00904 | 6.0983E-05 | 1.6040E-04 | -1.3952E+00 | -1.1053E+00 |
| CCNA_00905 | 6.6809E-05 | 1.4278E-04 | -1.0956E+00 | -9.1419E-01 |
| CCNA_00906 | 8.6411E-05 | 9.7994E-05 | -1.8153E-01 | -3.3114E-01 |
| CCNA_00907 | 1.3347E-04 | 5.6799E-05 | 1.2324E+00  | 5.7070E-01  |
| CCNA_00908 | 5.2757E-05 | 1.2453E-04 | -1.2390E+00 | -1.0057E+00 |
| CCNA_00909 | 6.8548E-05 | 1.5470E-04 | -1.1743E+00 | -9.6436E-01 |
| CCNA_00910 | 8.0506E-05 | 5.8225E-05 | 4.6734E-01  | 8.2737E-02  |
| CCNA_00911 | 7.8161E-05 | 4.7941E-05 | 7.0505E-01  | 2.3436E-01  |
| CCNA_00912 | 5.8652E-05 | 1.0058E-04 | -7.7809E-01 | -7.1165E-01 |
| CCNA_00913 | 6.6194E-05 | 1.7809E-05 | 1.8935E+00  | 9.9243E-01  |
| CCNA_00914 | 1.4502E-04 | 5.1935E-05 | 1.4813E+00  | 7.2946E-01  |
| CCNA_00915 | 1.3231E-04 | 1.0640E-04 | 3.1445E-01  | -1.4784E-02 |
| CCNA_00916 | 6.7706E-05 | 1.3171E-04 | -9.6004E-01 | -8.2771E-01 |
| CCNA_00917 | 6.9547E-05 | 6.0868E-05 | 1.9219E-01  | -9.2765E-02 |
| CCNA_00918 | 7.2594E-05 | 7.4153E-05 | -3.0714E-02 | -2.3494E-01 |
| CCNA_00919 | 2.1440E-04 | 1.6835E-04 | 3.4877E-01  | 7.1094E-03  |
| CCNA_00920 | 2.1888E-04 | 2.3375E-04 | -9.4877E-02 | -2.7587E-01 |
| CCNA_00921 | 4.8461E-05 | 8.4909E-05 | -8.0910E-01 | -7.3143E-01 |
| CCNA_00922 | 4.8097E-04 | 1.3180E-04 | 1.8675E+00  | 9.7585E-01  |
| CCNA_00923 | 5.1346E-05 | 6.9968E-05 | -4.4647E-01 | -5.0013E-01 |
| CCNA_00924 | 4.8391E-05 | 5.0311E-05 | -5.6213E-02 | -2.5121E-01 |
| CCNA_00925 | 1.3787E-04 | 5.9534E-05 | 1.2113E+00  | 5.5730E-01  |
| CCNA_00926 | 4.2436E-05 | 8.7934E-05 | -1.0511E+00 | -8.8580E-01 |
| CCNA_00927 | 4.5145E-05 | 3.5145E-05 | 3.6105E-01  | 1.4940E-02  |
| CCNA_00928 | 1.7721E-04 | 1.6093E-04 | 1.3906E-01  | -1.2665E-01 |
| CCNA_00929 | 2.0818E-04 | 1.7303E-04 | 2.6673E-01  | -4.5221E-02 |
| CCNA_00930 | 4.2491E-05 | 9.9884E-05 | -1.2331E+00 | -1.0018E+00 |
| CCNA_00931 | 8.7659E-05 | 1.6243E-04 | -8.8980E-01 | -7.8290E-01 |
| CCNA_00932 | 5.4685E-05 | 6.7854E-05 | -3.1135E-01 | -4.1395E-01 |
| CCNA_00933 | 7.1961E-05 | 5.9708E-05 | 2.6917E-01  | -4.3664E-02 |
| CCNA_00934 | 4.3273E-05 | 9.0246E-06 | 2.2603E+00  | 1.2264E+00  |
| CCNA_00935 | 5.6345E-05 | 8.6724E-05 | -6.2217E-01 | -6.1219E-01 |
| CCNA_00936 | 5.4662E-05 | 5.4695E-05 | -9.6206E-04 | -2.1597E-01 |
| CCNA_00937 | 6.0853E-05 | 3.8651E-05 | 6.5464E-01  | 2.0221E-01  |
| CCNA_00938 | 1.3672E-04 | 1.6521E-04 | -2.7309E-01 | -3.8954E-01 |
| CCNA_00939 | 1.4831E-04 | 1.8330E-04 | -3.0558E-01 | -4.1026E-01 |
| CCNA_00940 | 8.7678E-05 | 5.7040E-05 | 6.2011E-01  | 1.8018E-01  |
| CCNA_00941 | 1.2419E-04 | 1.0646E-04 | 2.2218E-01  | -7.3634E-02 |
| CCNA_00942 | 5.9822E-05 | 8.4627E-05 | -5.0047E-01 | -5.3457E-01 |
| CCNA_00943 | 6.3975E-05 | 4.0076E-05 | 6.7456E-01  | 2.1491E-01  |
| CCNA_00944 | 4.2842E-05 | 9.6561E-05 | -1.1724E+00 | -9.6313E-01 |
| CCNA_00945 | 2.9974E-05 | 8.3127E-05 | -1.4716E+00 | -1.1540E+00 |
| CCNA_00946 | 6.1270E-05 | 7.5909E-05 | -3.0916E-01 | -4.1254E-01 |
| CCNA_00947 | 6.9866E-05 | 1.5206E-04 | -1.1220E+00 | -9.3098E-01 |
| CCNA_00948 | 7.9974E-05 | 1.0425E-05 | 2.9384E+00  | 1.6589E+00  |
| CCNA_00949 | 7.1785E-05 | 1.0754E-04 | -5.8315E-01 | -5.8731E-01 |
| CCNA_00950 | 8.1482E-05 | 1.0461E-04 | -3.6047E-01 | -4.4528E-01 |
| CCNA_00951 | 1.0982E-04 | 6.7647E-05 | 6.9890E-01  | 2.3044E-01  |
| CCNA_00952 | 7.5799E-05 | 1.0080E-04 | -4.1122E-01 | -4.7764E-01 |
| CCNA_00953 | 5.0694E-05 | 2.7662E-05 | 8.7361E-01  | 3.4187E-01  |

|            |            |            |             |             |
|------------|------------|------------|-------------|-------------|
| CCNA_00954 | 5.5901E-05 | 1.4189E-04 | -1.3438E+00 | -1.0725E+00 |
| CCNA_00955 | 1.0179E-04 | 6.9528E-05 | 5.4983E-01  | 1.3535E-01  |
| CCNA_00956 | 7.4189E-05 | 1.3858E-04 | -9.0139E-01 | -7.9030E-01 |
| CCNA_00957 | 6.1630E-05 | 1.5009E-04 | -1.2841E+00 | -1.0344E+00 |
| CCNA_00958 | 2.0714E-04 | 1.4584E-04 | 5.0623E-01  | 1.0754E-01  |
| CCNA_00959 | 1.9550E-04 | 1.2087E-04 | 6.9358E-01  | 2.2704E-01  |
| CCNA_00960 | 1.6956E-04 | 1.2605E-04 | 4.2781E-01  | 5.7521E-02  |
| CCNA_00961 | 1.7390E-04 | 1.4350E-04 | 2.7717E-01  | -3.8560E-02 |
| CCNA_00962 | 6.3716E-05 | 1.0935E-04 | -7.7920E-01 | -7.1236E-01 |
| CCNA_00963 | 7.9336E-05 | 1.6243E-04 | -1.0337E+00 | -8.7471E-01 |
| CCNA_00964 | 4.2241E-05 | 1.6848E-05 | 1.3256E+00  | 6.3015E-01  |
| CCNA_00965 | 1.5868E-04 | 1.3281E-04 | 2.5670E-01  | -5.1619E-02 |
| CCNA_00966 | 1.4099E-04 | 8.8489E-05 | 6.7193E-01  | 2.1323E-01  |
| CCNA_00967 | 1.1417E-04 | 1.3322E-04 | -2.2263E-01 | -3.5736E-01 |
| CCNA_00968 | 1.0517E-04 | 9.7108E-05 | 1.1496E-01  | -1.4203E-01 |
| CCNA_00969 | 1.3106E-04 | 1.6243E-04 | -3.0956E-01 | -4.1280E-01 |
| CCNA_00970 | 1.3303E-04 | 1.6142E-04 | -2.7908E-01 | -3.9336E-01 |
| CCNA_00971 | 5.8652E-05 | 4.8106E-05 | 2.8583E-01  | -3.3039E-02 |
| CCNA_00972 | 4.9788E-05 | 2.1679E-05 | 1.1991E+00  | 5.4948E-01  |
| CCNA_00973 | 2.3664E-04 | 1.6270E-04 | 5.4043E-01  | 1.2936E-01  |
| CCNA_00974 | 1.6185E-04 | 4.1112E-05 | 1.9768E+00  | 1.0455E+00  |
| CCNA_00975 | 4.3726E-05 | 5.0800E-05 | -2.1642E-01 | -3.5339E-01 |
| CCNA_00976 | 4.9326E-04 | 5.9270E-04 | -2.6496E-01 | -3.8435E-01 |
| CCNA_00977 | 7.8460E-04 | 5.7719E-04 | 4.4290E-01  | 6.7146E-02  |
| CCNA_00978 | 2.5304E-04 | 4.7964E-04 | -9.2257E-01 | -8.0381E-01 |
| CCNA_00979 | 1.9653E-04 | 2.1908E-04 | -1.5680E-01 | -3.1536E-01 |
| CCNA_00980 | 7.1780E-05 | 1.5503E-04 | -1.1108E+00 | -9.2389E-01 |
| CCNA_00981 | 5.5198E-05 | 6.5227E-05 | -2.4092E-01 | -3.6902E-01 |
| CCNA_00982 | 1.0872E-04 | 1.3641E-04 | -3.2736E-01 | -4.2416E-01 |
| CCNA_00983 | 1.1047E-04 | 4.0457E-05 | 1.4490E+00  | 7.0889E-01  |
| CCNA_00984 | 6.0867E-05 | 6.2087E-05 | -2.8697E-02 | -2.3366E-01 |
| CCNA_00985 | 1.7496E-04 | 1.0172E-04 | 7.8232E-01  | 2.8364E-01  |
| CCNA_00986 | 1.4126E-04 | 1.4820E-04 | -6.9224E-02 | -2.5951E-01 |
| CCNA_00987 | 9.6589E-05 | 9.5152E-05 | 2.1564E-02  | -2.0160E-01 |
| CCNA_00988 | 8.3243E-05 | 8.5920E-05 | -4.5719E-02 | -2.4451E-01 |
| CCNA_00989 | 9.5261E-05 | 1.1662E-04 | -2.9183E-01 | -4.0149E-01 |
| CCNA_00990 | 9.0397E-05 | 5.1769E-05 | 8.0402E-01  | 2.9749E-01  |
| CCNA_00991 | 7.7597E-05 | 5.9857E-05 | 3.7437E-01  | 2.3434E-02  |
| CCNA_00992 | 6.4118E-05 | 1.5747E-04 | -1.2963E+00 | -1.0422E+00 |
| CCNA_00993 | 4.4946E-05 | 1.3695E-04 | -1.6073E+00 | -1.2406E+00 |
| CCNA_00994 | 1.0316E-04 | 7.1567E-05 | 5.2741E-01  | 1.2105E-01  |
| CCNA_00995 | 1.0359E-04 | 8.3509E-05 | 3.1080E-01  | -1.7108E-02 |
| CCNA_00996 | 6.0937E-05 | 1.4933E-05 | 2.0281E+00  | 1.0782E+00  |
| CCNA_00997 | 6.4784E-05 | 1.4767E-04 | -1.1886E+00 | -9.7350E-01 |
| CCNA_00998 | 1.3294E-04 | 1.1734E-04 | 1.8011E-01  | -1.0047E-01 |
| CCNA_00999 | 5.9395E-04 | 1.5871E-04 | 1.9039E+00  | 9.9901E-01  |
| CCNA_01000 | 8.9435E-05 | 1.5977E-04 | -8.3705E-01 | -7.4926E-01 |
| CCNA_01001 | 9.5631E-05 | 1.0867E-04 | -1.8441E-01 | -3.3298E-01 |
| CCNA_01002 | 9.5164E-05 | 1.1657E-04 | -2.9268E-01 | -4.0204E-01 |
| CCNA_01003 | 2.4094E-04 | 1.1293E-04 | 1.0932E+00  | 4.8195E-01  |
| CCNA_01004 | 2.2007E-04 | 1.0711E-04 | 1.0388E+00  | 4.4723E-01  |
| CCNA_01005 | 1.5790E-04 | 1.3815E-04 | 1.9265E-01  | -9.2470E-02 |
| CCNA_01006 | 1.6221E-04 | 1.2058E-04 | 4.2775E-01  | 5.7486E-02  |

|            |            |            |             |             |
|------------|------------|------------|-------------|-------------|
| CCNA_01007 | 7.1531E-05 | 1.4045E-04 | -9.7341E-01 | -8.3623E-01 |
| CCNA_01008 | 5.6701E-05 | 7.6630E-05 | -4.3458E-01 | -4.9255E-01 |
| CCNA_01009 | 7.3015E-05 | 1.6176E-05 | 2.1737E+00  | 1.1711E+00  |
| CCNA_01010 | 5.5947E-05 | 5.2565E-05 | 8.9863E-02  | -1.5803E-01 |
| CCNA_01011 | 1.8529E-04 | 1.2061E-04 | 6.1940E-01  | 1.7973E-01  |
| CCNA_01012 | 6.3133E-05 | 5.2382E-05 | 2.6919E-01  | -4.3650E-02 |
| CCNA_01013 | 4.9672E-05 | 8.4810E-05 | -7.7179E-01 | -7.0763E-01 |
| CCNA_01014 | 1.6621E-04 | 1.1052E-04 | 5.8868E-01  | 1.6013E-01  |
| CCNA_01015 | 1.9115E-04 | 1.4699E-04 | 3.7895E-01  | 2.6356E-02  |
| CCNA_01016 | 5.4689E-05 | 6.1076E-05 | -1.5941E-01 | -3.1703E-01 |
| CCNA_01017 | 6.7540E-05 | 8.9409E-05 | -4.0471E-01 | -4.7350E-01 |
| CCNA_01018 | 5.3242E-05 | 4.9515E-05 | 1.0458E-01  | -1.4864E-01 |
| CCNA_01019 | 6.8381E-05 | 4.1071E-05 | 7.3531E-01  | 2.5366E-01  |
| CCNA_01020 | 1.1404E-04 | 1.0156E-04 | 1.6718E-01  | -1.0872E-01 |
| CCNA_01021 | 6.3637E-05 | 3.1110E-05 | 1.0322E+00  | 4.4305E-01  |
| CCNA_01022 | 7.0717E-05 | 1.0955E-05 | 2.6894E+00  | 1.5001E+00  |
| CCNA_01023 | 6.4654E-05 | 8.1362E-05 | -3.3165E-01 | -4.2689E-01 |
| CCNA_01024 | 1.0162E-04 | 1.4081E-04 | -4.7054E-01 | -5.1548E-01 |
| CCNA_01025 | 4.2978E-04 | 1.6243E-04 | 1.4038E+00  | 6.8002E-01  |
| CCNA_01026 | 3.6740E-04 | 1.0868E-04 | 1.7571E+00  | 9.0541E-01  |
| CCNA_01027 | 6.3448E-05 | 4.9747E-05 | 3.5082E-01  | 8.4131E-03  |
| CCNA_01028 | 7.5914E-05 | 1.0110E-04 | -4.1340E-01 | -4.7904E-01 |
| CCNA_01029 | 4.7550E-05 | 6.7664E-05 | -5.0898E-01 | -5.4000E-01 |
| CCNA_01030 | 9.9469E-05 | 1.2016E-04 | -2.7269E-01 | -3.8928E-01 |
| CCNA_01031 | 9.3994E-05 | 1.4588E-04 | -6.3411E-01 | -6.1982E-01 |
| CCNA_01032 | 7.2663E-05 | 8.8307E-05 | -2.8134E-01 | -3.9480E-01 |
| CCNA_01033 | 2.5532E-04 | 1.6270E-04 | 6.5005E-01  | 1.9928E-01  |
| CCNA_01034 | 8.1976E-05 | 2.4190E-05 | 1.7604E+00  | 9.0750E-01  |
| CCNA_01035 | 6.5931E-05 | 8.8174E-05 | -4.1944E-01 | -4.8289E-01 |
| CCNA_01036 | 6.2611E-05 | 6.3454E-05 | -1.9385E-02 | -2.2772E-01 |
| CCNA_01037 | 1.3683E-04 | 1.5968E-04 | -2.2288E-01 | -3.5751E-01 |
| CCNA_01038 | 7.1725E-05 | 1.4033E-04 | -9.6830E-01 | -8.3298E-01 |
| CCNA_01039 | 7.5355E-05 | 1.5550E-04 | -1.0451E+00 | -8.8197E-01 |
| CCNA_01040 | 5.5711E-05 | 9.7530E-05 | -8.0788E-01 | -7.3065E-01 |
| CCNA_01041 | 3.6985E-04 | 7.7650E-05 | 2.2517E+00  | 1.2209E+00  |
| CCNA_01042 | 2.9377E-04 | 1.6261E-04 | 8.5326E-01  | 3.2889E-01  |
| CCNA_01043 | 3.6701E-04 | 1.9975E-04 | 8.7758E-01  | 3.4441E-01  |
| CCNA_01044 | 3.8180E-04 | 2.2979E-04 | 7.3247E-01  | 2.5185E-01  |
| CCNA_01045 | 9.8656E-05 | 7.8669E-05 | 3.2652E-01  | -7.0821E-03 |
| CCNA_01046 | 2.4675E-04 | 5.0715E-04 | -1.0394E+00 | -8.7831E-01 |
| CCNA_01047 | 1.9494E-04 | 1.9421E-04 | 5.4004E-03  | -2.1191E-01 |
| CCNA_01048 | 7.1452E-05 | 8.1876E-06 | 3.1241E+00  | 1.7773E+00  |
| CCNA_01049 | 1.2770E-04 | 8.7710E-05 | 5.4191E-01  | 1.3030E-01  |
| CCNA_01050 | 7.1822E-05 | 8.8124E-05 | -2.9516E-01 | -4.0362E-01 |
| CCNA_01051 | 7.4226E-05 | 6.1705E-05 | 2.6643E-01  | -4.5410E-02 |
| CCNA_01052 | 6.6731E-05 | 9.3511E-05 | -4.8681E-01 | -5.2586E-01 |
| CCNA_01053 | 6.8664E-05 | 4.3192E-05 | 6.6860E-01  | 2.1111E-01  |
| CCNA_01054 | 7.2839E-05 | 1.4260E-04 | -9.6913E-01 | -8.3350E-01 |
| CCNA_01055 | 5.7714E-05 | 2.3660E-05 | 1.2861E+00  | 6.0498E-01  |
| CCNA_01056 | 1.4757E-04 | 6.2832E-05 | 1.2317E+00  | 5.7029E-01  |
| CCNA_01057 | 5.6064E-04 | 1.6243E-04 | 1.7872E+00  | 9.2461E-01  |
| CCNA_01058 | 4.5354E-04 | 1.6243E-04 | 1.4814E+00  | 7.2954E-01  |
| CCNA_01059 | 4.1124E-04 | 1.4285E-04 | 1.5254E+00  | 7.5761E-01  |

|            |            |            |             |             |
|------------|------------|------------|-------------|-------------|
| CCNA_01060 | 2.3673E-04 | 2.4211E-04 | -3.2435E-02 | -2.3604E-01 |
| CCNA_01061 | 6.8862E-05 | 1.2230E-04 | -8.2864E-01 | -7.4389E-01 |
| CCNA_01062 | 7.5174E-05 | 1.6298E-04 | -1.1164E+00 | -9.2743E-01 |
| CCNA_01063 | 6.5676E-05 | 3.9562E-05 | 7.3104E-01  | 2.5094E-01  |
| CCNA_01064 | 6.9237E-05 | 5.3319E-05 | 3.7677E-01  | 2.4967E-02  |
| CCNA_01065 | 6.1025E-05 | 1.6156E-04 | -1.4045E+00 | -1.1112E+00 |
| CCNA_01066 | 7.2677E-05 | 1.7129E-05 | 2.0844E+00  | 1.1142E+00  |
| CCNA_01067 | 2.2279E-04 | 1.3510E-04 | 7.2153E-01  | 2.4487E-01  |
| CCNA_01068 | 1.3913E-04 | 1.6243E-04 | -2.2337E-01 | -3.5783E-01 |
| CCNA_01069 | 1.0892E-04 | 8.1404E-05 | 4.1997E-01  | 5.2524E-02  |
| CCNA_01070 | 1.5230E-04 | 3.1897E-05 | 2.2551E+00  | 1.2231E+00  |
| CCNA_01071 | 7.4680E-05 | 4.5579E-07 | 7.3303E+00  | 4.4602E+00  |
| CCNA_01072 | 8.7396E-05 | 1.2329E-04 | -4.9649E-01 | -5.3204E-01 |
| CCNA_01073 | 9.4841E-05 | 7.0200E-05 | 4.3394E-01  | 6.1436E-02  |
| CCNA_01074 | 8.4857E-05 | 1.6269E-04 | -9.3902E-01 | -8.1430E-01 |
| CCNA_01075 | 5.6618E-05 | 1.0277E-04 | -8.6006E-01 | -7.6393E-01 |
| CCNA_01076 | 6.3591E-05 | 5.3203E-05 | 2.5720E-01  | -5.1301E-02 |
| CCNA_01077 | 5.7667E-05 | 1.5721E-05 | 1.8745E+00  | 9.8026E-01  |
| CCNA_01078 | 6.6971E-05 | 5.1247E-05 | 3.8593E-01  | 3.0814E-02  |
| CCNA_01079 | 1.1056E-04 | 1.6267E-04 | -5.5707E-01 | -5.7067E-01 |
| CCNA_01080 | 1.1079E-04 | 1.2543E-04 | -1.7907E-01 | -3.2957E-01 |
| CCNA_01081 | 9.5363E-05 | 4.0325E-05 | 1.2415E+00  | 5.7655E-01  |
| CCNA_01082 | 2.6154E-04 | 1.4925E-04 | 8.0928E-01  | 3.0084E-01  |
| CCNA_01083 | 2.5524E-04 | 1.4221E-04 | 8.4374E-01  | 3.2282E-01  |
| CCNA_01084 | 8.6235E-05 | 5.4918E-05 | 6.5085E-01  | 1.9979E-01  |
| CCNA_01085 | 3.4713E-04 | 1.0945E-04 | 1.6651E+00  | 8.4675E-01  |
| CCNA_01086 | 1.3053E-04 | 1.7526E-04 | -4.2521E-01 | -4.8657E-01 |
| CCNA_01087 | 1.2885E-04 | 1.7453E-04 | -4.3775E-01 | -4.9457E-01 |
| CCNA_01088 | 4.7818E-05 | 2.3129E-05 | 1.0475E+00  | 4.5277E-01  |
| CCNA_01089 | 6.1778E-05 | 4.8264E-05 | 3.5602E-01  | 1.1732E-02  |
| CCNA_01090 | 1.0074E-04 | 4.4443E-05 | 1.1804E+00  | 5.3756E-01  |
| CCNA_01091 | 5.2271E-05 | 2.9278E-05 | 8.3591E-01  | 3.1783E-01  |
| CCNA_01092 | 5.9961E-05 | 1.5799E-04 | -1.3977E+00 | -1.1069E+00 |
| CCNA_01093 | 2.7153E-04 | 1.1961E-04 | 1.1828E+00  | 5.3906E-01  |
| CCNA_01094 | 9.3084E-05 | 6.3802E-05 | 5.4481E-01  | 1.3215E-01  |
| CCNA_01095 | 4.6371E-05 | 1.2107E-04 | -1.3846E+00 | -1.0985E+00 |
| CCNA_01096 | 4.0517E-05 | 5.2805E-05 | -3.8223E-01 | -4.5915E-01 |
| CCNA_01097 | 1.2472E-04 | 1.9501E-04 | -6.4485E-01 | -6.2666E-01 |
| CCNA_01098 | 1.2969E-04 | 3.2485E-04 | -1.3247E+00 | -1.0603E+00 |
| CCNA_01099 | 8.7794E-05 | 1.6169E-04 | -8.8103E-01 | -7.7731E-01 |
| CCNA_01100 | 1.2390E-04 | 9.1274E-05 | 4.4081E-01  | 6.5819E-02  |
| CCNA_01101 | 3.8605E-04 | 1.1139E-04 | 1.7930E+00  | 9.2831E-01  |
| CCNA_01102 | 3.8560E-04 | 1.0226E-04 | 1.9147E+00  | 1.0059E+00  |
| CCNA_01103 | 1.0639E-04 | 1.1325E-04 | -9.0241E-02 | -2.7291E-01 |
| CCNA_01104 | 4.1711E-04 | 1.6072E-04 | 1.3758E+00  | 6.6221E-01  |
| CCNA_01105 | 4.0388E-04 | 1.2987E-04 | 1.6368E+00  | 8.2868E-01  |
| CCNA_01106 | 1.4404E-04 | 1.4160E-04 | 2.4569E-02  | -1.9968E-01 |
| CCNA_01107 | 2.6707E-04 | 4.4883E-05 | 2.5727E+00  | 1.4256E+00  |
| CCNA_01108 | 5.6844E-04 | 3.2841E-04 | 7.9149E-01  | 2.8950E-01  |
| CCNA_01109 | 7.2683E-04 | 1.3455E-04 | 2.4334E+00  | 1.3368E+00  |
| CCNA_01110 | 7.1591E-05 | 4.3225E-05 | 7.2771E-01  | 2.4881E-01  |
| CCNA_01111 | 1.8168E-04 | 1.1697E-04 | 6.3515E-01  | 1.8977E-01  |
| CCNA_01112 | 6.0363E-05 | 5.3526E-05 | 1.7332E-01  | -1.0480E-01 |

|            |            |            |             |             |
|------------|------------|------------|-------------|-------------|
| CCNA_01113 | 5.7085E-05 | 8.0948E-05 | -5.0392E-01 | -5.3677E-01 |
| CCNA_01114 | 6.4432E-05 | 7.4567E-05 | -2.1080E-01 | -3.4981E-01 |
| CCNA_01115 | 2.0182E-04 | 9.1456E-05 | 1.1419E+00  | 5.1297E-01  |
| CCNA_01116 | 2.0037E-04 | 7.3291E-05 | 1.4508E+00  | 7.1004E-01  |
| CCNA_01117 | 7.4485E-05 | 1.1039E-04 | -5.6762E-01 | -5.7741E-01 |
| CCNA_01118 | 7.2742E-05 | 1.3788E-04 | -9.2255E-01 | -8.0379E-01 |
| CCNA_01119 | 1.1648E-04 | 1.0222E-04 | 1.8830E-01  | -9.5248E-02 |
| CCNA_01120 | 1.9774E-04 | 1.2856E-04 | 6.2115E-01  | 1.8084E-01  |
| CCNA_01121 | 2.7356E-04 | 1.2905E-04 | 1.0838E+00  | 4.7594E-01  |
| CCNA_01122 | 1.2307E-04 | 1.0244E-04 | 2.6453E-01  | -4.6623E-02 |
| CCNA_01123 | 6.2948E-05 | 6.1838E-05 | 2.5584E-02  | -1.9903E-01 |
| CCNA_01124 | 4.5261E-05 | 1.6988E-06 | 4.7288E+00  | 2.8009E+00  |
| CCNA_01125 | 9.8041E-05 | 4.0573E-05 | 1.2726E+00  | 5.9638E-01  |
| CCNA_01126 | 8.4543E-05 | 3.6422E-05 | 1.2146E+00  | 5.5940E-01  |
| CCNA_01127 | 7.2751E-05 | 1.0136E-04 | -4.7845E-01 | -5.2053E-01 |
| CCNA_01128 | 4.9682E-05 | 1.3222E-04 | -1.4121E+00 | -1.1161E+00 |
| CCNA_01129 | 1.6165E-04 | 2.5814E-05 | 2.6463E+00  | 1.4725E+00  |
| CCNA_01130 | 1.3524E-04 | 1.4681E-04 | -1.1844E-01 | -2.9090E-01 |
| CCNA_01131 | 9.5876E-05 | 1.6133E-04 | -7.5079E-01 | -6.9424E-01 |
| CCNA_01132 | 2.4438E-04 | 2.4182E-05 | 3.3367E+00  | 1.9129E+00  |
| CCNA_01133 | 7.5387E-05 | 1.0317E-04 | -4.5260E-01 | -5.0404E-01 |
| CCNA_01134 | 5.9674E-05 | 1.4335E-04 | -1.2643E+00 | -1.0218E+00 |
| CCNA_01135 | 6.8839E-05 | 4.6731E-05 | 5.5870E-01  | 1.4101E-01  |
| CCNA_01136 | 5.2687E-05 | 1.1123E-04 | -1.0780E+00 | -9.0294E-01 |
| CCNA_01137 | 7.0647E-05 | 6.1324E-06 | 3.5243E+00  | 2.0326E+00  |
| CCNA_01138 | 6.2624E-05 | 3.7035E-05 | 7.5763E-01  | 2.6790E-01  |
| CCNA_01139 | 6.7087E-05 | 1.5901E-04 | -1.2450E+00 | -1.0095E+00 |
| CCNA_01140 | 2.6143E-04 | 7.8851E-05 | 1.7291E+00  | 8.8755E-01  |
| CCNA_01141 | 2.6373E-04 | 5.9990E-05 | 2.1361E+00  | 1.1471E+00  |
| CCNA_01142 | 1.7124E-04 | 5.3675E-05 | 1.6735E+00  | 8.5208E-01  |
| CCNA_01143 | 9.2307E-05 | 7.1948E-05 | 3.5938E-01  | 1.3878E-02  |
| CCNA_01144 | 1.8027E-04 | 1.0143E-04 | 8.2964E-01  | 3.1383E-01  |
| CCNA_01145 | 6.1353E-05 | 1.6045E-04 | -1.3868E+00 | -1.0999E+00 |
| CCNA_01146 | 6.1071E-05 | 5.8067E-05 | 7.2658E-02  | -1.6901E-01 |
| CCNA_01147 | 6.9931E-05 | 1.4150E-04 | -1.0168E+00 | -8.6392E-01 |
| CCNA_01148 | 6.4257E-05 | 1.1410E-04 | -8.2843E-01 | -7.4376E-01 |
| CCNA_01149 | 7.1808E-05 | 1.9060E-07 | 8.4961E+00  | 5.2038E+00  |
| CCNA_01150 | 7.3769E-05 | 1.2049E-05 | 2.6131E+00  | 1.4514E+00  |
| CCNA_01151 | 1.3547E-04 | 1.2309E-04 | 1.3827E-01  | -1.2716E-01 |
| CCNA_01152 | 6.9357E-05 | 4.2165E-05 | 7.1783E-01  | 2.4251E-01  |
| CCNA_01153 | 4.9816E-05 | 1.5663E-05 | 1.6687E+00  | 8.4899E-01  |
| CCNA_01154 | 1.1795E-04 | 1.6243E-04 | -4.6160E-01 | -5.0978E-01 |
| CCNA_01155 | 1.5611E-04 | 7.2197E-05 | 1.1125E+00  | 4.9423E-01  |
| CCNA_01156 | 8.9856E-05 | 4.4394E-05 | 1.0171E+00  | 4.3337E-01  |
| CCNA_01157 | 9.1923E-05 | 1.6195E-04 | -8.1709E-01 | -7.3652E-01 |
| CCNA_01158 | 8.1593E-05 | 1.0925E-04 | -4.2113E-01 | -4.8396E-01 |
| CCNA_01159 | 3.6561E-04 | 1.3016E-04 | 1.4900E+00  | 7.3503E-01  |
| CCNA_01160 | 6.8728E-05 | 9.6080E-05 | -4.8336E-01 | -5.2366E-01 |
| CCNA_01161 | 6.1713E-05 | 2.8259E-06 | 4.4447E+00  | 2.6197E+00  |
| CCNA_01162 | 1.1831E-04 | 5.8540E-05 | 1.0149E+00  | 4.3200E-01  |
| CCNA_01163 | 8.2904E-04 | 1.6267E-04 | 2.3494E+00  | 1.2832E+00  |
| CCNA_01164 | 1.5384E-04 | 1.1613E-04 | 4.0561E-01  | 4.3366E-02  |
| CCNA_01165 | 7.3713E-05 | 4.4253E-05 | 7.3597E-01  | 2.5408E-01  |

|            |            |            |             |             |
|------------|------------|------------|-------------|-------------|
| CCNA_01166 | 5.3982E-05 | 1.0853E-04 | -1.0075E+00 | -8.5797E-01 |
| CCNA_01167 | 6.1172E-05 | 1.1007E-04 | -8.4745E-01 | -7.5589E-01 |
| CCNA_01168 | 6.8687E-05 | 1.0013E-04 | -5.4383E-01 | -5.6223E-01 |
| CCNA_01169 | 7.6820E-05 | 2.4861E-05 | 1.6272E+00  | 8.2255E-01  |
| CCNA_01170 | 2.1375E-04 | 1.5910E-04 | 4.2592E-01  | 5.6317E-02  |
| CCNA_01171 | 3.5564E-04 | 3.2518E-04 | 1.2919E-01  | -1.3295E-01 |
| CCNA_01172 | 8.5801E-05 | 1.5537E-04 | -8.5661E-01 | -7.6173E-01 |
| CCNA_01173 | 1.2601E-04 | 1.1440E-04 | 1.3939E-01  | -1.2644E-01 |
| CCNA_01174 | 1.8816E-04 | 1.0602E-04 | 8.2763E-01  | 3.1255E-01  |
| CCNA_01175 | 1.9170E-04 | 1.0335E-04 | 8.9124E-01  | 3.5312E-01  |
| CCNA_01176 | 3.9051E-05 | 1.0895E-04 | -1.4802E+00 | -1.1595E+00 |
| CCNA_01177 | 6.0174E-05 | 6.8211E-05 | -1.8093E-01 | -3.3076E-01 |
| CCNA_01178 | 5.5397E-05 | 5.7073E-05 | -4.3088E-02 | -2.4284E-01 |
| CCNA_01179 | 9.8119E-05 | 6.4125E-05 | 6.1353E-01  | 1.7598E-01  |
| CCNA_01180 | 1.0276E-04 | 1.6243E-04 | -6.6055E-01 | -6.3668E-01 |
| CCNA_01181 | 4.7344E-04 | 1.6243E-04 | 1.5433E+00  | 7.6905E-01  |
| CCNA_01182 | 4.7478E-04 | 1.6243E-04 | 1.5474E+00  | 7.7165E-01  |
| CCNA_01183 | 1.3577E-04 | 1.1591E-04 | 2.2813E-01  | -6.9841E-02 |
| CCNA_01184 | 6.9376E-05 | 1.1791E-04 | -7.6517E-01 | -7.0341E-01 |
| CCNA_01185 | 1.2473E-04 | 2.0187E-05 | 2.6268E+00  | 1.4601E+00  |
| CCNA_01186 | 1.3051E-04 | 8.5854E-06 | 3.9248E+00  | 2.2881E+00  |
| CCNA_01187 | 9.2515E-05 | 6.8617E-05 | 4.3102E-01  | 5.9571E-02  |
| CCNA_01188 | 6.0160E-05 | 1.6238E-04 | -1.4325E+00 | -1.1291E+00 |
| CCNA_01189 | 1.1243E-04 | 4.4402E-05 | 1.3401E+00  | 6.3944E-01  |
| CCNA_01190 | 1.2930E-04 | 1.2116E-05 | 3.4149E+00  | 1.9628E+00  |
| CCNA_01191 | 1.7708E-04 | 4.1344E-05 | 2.0984E+00  | 1.1231E+00  |
| CCNA_01192 | 5.3589E-05 | 5.9667E-05 | -1.5507E-01 | -3.1426E-01 |
| CCNA_01193 | 1.0831E-04 | 9.2550E-05 | 2.2681E-01  | -7.0684E-02 |
| CCNA_01194 | 1.1938E-04 | 1.4087E-04 | -2.3884E-01 | -3.6769E-01 |
| CCNA_01195 | 3.3734E-04 | 3.2999E-05 | 3.3534E+00  | 1.9236E+00  |
| CCNA_01196 | 3.6161E-04 | 4.0764E-05 | 3.1488E+00  | 1.7931E+00  |
| CCNA_01197 | 1.2177E-04 | 3.7176E-05 | 1.7115E+00  | 8.7630E-01  |
| CCNA_01198 | 1.2185E-04 | 3.7441E-05 | 1.7022E+00  | 8.7036E-01  |
| CCNA_01199 | 9.8068E-05 | 1.6267E-04 | -7.3006E-01 | -6.8102E-01 |
| CCNA_01200 | 5.3866E-05 | 2.0022E-05 | 1.4274E+00  | 6.9508E-01  |
| CCNA_01201 | 5.5772E-05 | 1.0823E-04 | -9.5648E-01 | -8.2543E-01 |
| CCNA_01202 | 1.0269E-04 | 6.0636E-05 | 7.5988E-01  | 2.6933E-01  |
| CCNA_01203 | 6.3864E-05 | 9.6138E-05 | -5.9013E-01 | -5.9176E-01 |
| CCNA_01204 | 1.3385E-04 | 8.9542E-05 | 5.7990E-01  | 1.5453E-01  |
| CCNA_01205 | 1.4911E-04 | 6.9222E-05 | 1.1069E+00  | 4.9071E-01  |
| CCNA_01206 | 6.3831E-05 | 8.4288E-05 | -4.0109E-01 | -4.7118E-01 |
| CCNA_01207 | 8.1334E-05 | 7.2909E-05 | 1.5766E-01  | -1.1479E-01 |
| CCNA_01208 | 5.8084E-05 | 8.4196E-05 | -5.3566E-01 | -5.5702E-01 |
| CCNA_01209 | 5.3543E-05 | 1.4986E-04 | -1.4848E+00 | -1.1624E+00 |
| CCNA_01210 | 1.3935E-04 | 6.0031E-05 | 1.2148E+00  | 5.5950E-01  |
| CCNA_01211 | 9.3042E-05 | 1.0866E-04 | -2.2390E-01 | -3.5817E-01 |
| CCNA_01212 | 8.4529E-05 | 6.3222E-05 | 4.1891E-01  | 5.1847E-02  |
| CCNA_01213 | 5.7408E-05 | 1.3797E-04 | -1.2650E+00 | -1.0222E+00 |
| CCNA_01214 | 1.1306E-04 | 1.3989E-05 | 3.0140E+00  | 1.7071E+00  |
| CCNA_01215 | 1.2530E-04 | 1.3437E-04 | -1.0086E-01 | -2.7968E-01 |
| CCNA_01216 | 1.9252E-04 | 4.9938E-05 | 1.9466E+00  | 1.0263E+00  |
| CCNA_01217 | 1.6889E-04 | 3.4449E-05 | 2.2932E+00  | 1.2474E+00  |
| CCNA_01218 | 6.2088E-05 | 1.4143E-04 | -1.1876E+00 | -9.7288E-01 |

|            |            |            |             |             |
|------------|------------|------------|-------------|-------------|
| CCNA_01219 | 5.9489E-05 | 7.0357E-05 | -2.4212E-01 | -3.6979E-01 |
| CCNA_01220 | 3.3162E-04 | 3.1375E-05 | 3.4015E+00  | 1.9543E+00  |
| CCNA_01221 | 5.0599E-04 | 1.0310E-04 | 2.2950E+00  | 1.2485E+00  |
| CCNA_01222 | 5.6951E-05 | 1.0399E-04 | -8.6860E-01 | -7.6938E-01 |
| CCNA_01223 | 1.1899E-04 | 6.8575E-05 | 7.9499E-01  | 2.9173E-01  |
| CCNA_01224 | 1.3923E-04 | 1.5932E-04 | -1.9445E-01 | -3.3938E-01 |
| CCNA_01225 | 6.6421E-05 | 2.5731E-05 | 1.3677E+00  | 6.5706E-01  |
| CCNA_01226 | 1.9787E-04 | 8.4395E-05 | 1.2292E+00  | 5.6867E-01  |
| CCNA_01227 | 1.9899E-04 | 1.0113E-04 | 9.7641E-01  | 4.0744E-01  |
| CCNA_01228 | 6.7040E-05 | 7.9017E-05 | -2.3718E-01 | -3.6664E-01 |
| CCNA_01229 | 1.7149E-04 | 1.7403E-05 | 3.3000E+00  | 1.8896E+00  |
| CCNA_01230 | 1.5959E-04 | 5.4612E-05 | 1.5469E+00  | 7.7135E-01  |
| CCNA_01231 | 5.2729E-05 | 2.5035E-05 | 1.0743E+00  | 4.6987E-01  |
| CCNA_01232 | 6.6624E-05 | 4.7609E-05 | 4.8466E-01  | 9.3785E-02  |
| CCNA_01233 | 1.0481E-04 | 9.6967E-05 | 1.1222E-01  | -1.4377E-01 |
| CCNA_01234 | 1.1144E-04 | 5.8117E-05 | 9.3904E-01  | 3.8361E-01  |
| CCNA_01235 | 1.2164E-04 | 9.3362E-05 | 3.8166E-01  | 2.8090E-02  |
| CCNA_01236 | 4.5802E-05 | 6.9462E-05 | -6.0084E-01 | -5.9859E-01 |
| CCNA_01237 | 4.6472E-05 | 1.5704E-04 | -1.7566E+00 | -1.3358E+00 |
| CCNA_01238 | 5.2091E-05 | 1.2553E-04 | -1.2689E+00 | -1.0247E+00 |
| CCNA_01239 | 5.5762E-05 | 1.3020E-04 | -1.2233E+00 | -9.9563E-01 |
| CCNA_01240 | 6.6925E-05 | 9.3387E-05 | -4.8070E-01 | -5.2196E-01 |
| CCNA_01241 | 6.1908E-05 | 1.3920E-04 | -1.1689E+00 | -9.6094E-01 |
| CCNA_01242 | 2.0933E-04 | 1.8577E-04 | 1.7222E-01  | -1.0550E-01 |
| CCNA_01243 | 2.0141E-04 | 1.7398E-04 | 2.1118E-01  | -8.0653E-02 |
| CCNA_01244 | 9.5100E-05 | 2.7198E-05 | 1.8056E+00  | 9.3631E-01  |
| CCNA_01245 | 5.2396E-05 | 1.4060E-04 | -1.4240E+00 | -1.1236E+00 |
| CCNA_01246 | 1.1678E-04 | 8.4395E-05 | 4.6850E-01  | 8.3478E-02  |
| CCNA_01247 | 1.8238E-04 | 8.9144E-05 | 1.0327E+00  | 4.4333E-01  |
| CCNA_01248 | 1.6971E-04 | 1.0383E-04 | 7.0883E-01  | 2.3677E-01  |
| CCNA_01249 | 9.1812E-05 | 1.5409E-04 | -7.4702E-01 | -6.9183E-01 |
| CCNA_01250 | 5.4851E-05 | 1.1914E-04 | -1.1191E+00 | -9.2914E-01 |
| CCNA_01251 | 4.3337E-05 | 4.5919E-05 | -8.3576E-02 | -2.6866E-01 |
| CCNA_01252 | 1.9536E-04 | 1.5995E-04 | 2.8852E-01  | -3.1321E-02 |
| CCNA_01253 | 1.9745E-04 | 1.6108E-04 | 2.9364E-01  | -2.8058E-02 |
| CCNA_01254 | 8.3724E-05 | 1.2848E-04 | -6.1787E-01 | -6.0945E-01 |
| CCNA_01255 | 1.3765E-04 | 9.3602E-05 | 5.5627E-01  | 1.3946E-01  |
| CCNA_01256 | 6.5552E-05 | 1.1702E-04 | -8.3607E-01 | -7.4863E-01 |
| CCNA_01257 | 5.6428E-05 | 7.9688E-05 | -4.9798E-01 | -5.3299E-01 |
| CCNA_01258 | 2.1991E-04 | 1.2643E-04 | 7.9857E-01  | 2.9401E-01  |
| CCNA_01259 | 2.0694E-04 | 1.4245E-04 | 5.3877E-01  | 1.2830E-01  |
| CCNA_01260 | 9.0873E-05 | 4.0316E-05 | 1.1723E+00  | 5.3237E-01  |
| CCNA_01261 | 3.4961E-04 | 1.2116E-04 | 1.5287E+00  | 7.5970E-01  |
| CCNA_01262 | 6.9010E-05 | 1.1570E-04 | -7.4556E-01 | -6.9090E-01 |
| CCNA_01263 | 7.9382E-05 | 7.0805E-05 | 1.6489E-01  | -1.1018E-01 |
| CCNA_01264 | 3.4181E-04 | 2.8765E-04 | 2.4887E-01  | -5.6612E-02 |
| CCNA_01265 | 2.5135E-04 | 1.8392E-04 | 4.5055E-01  | 7.2029E-02  |
| CCNA_01266 | 7.4065E-05 | 3.8626E-05 | 9.3899E-01  | 3.8358E-01  |
| CCNA_01267 | 6.2245E-05 | 2.2781E-05 | 1.4497E+00  | 7.0933E-01  |
| CCNA_01268 | 2.1297E-04 | 5.8995E-05 | 1.8518E+00  | 9.6580E-01  |
| CCNA_01269 | 2.0737E-04 | 4.8388E-05 | 2.0993E+00  | 1.1236E+00  |
| CCNA_01270 | 4.2338E-05 | 1.3326E-04 | -1.6541E+00 | -1.2704E+00 |
| CCNA_01271 | 7.1567E-05 | 5.8382E-05 | 2.9366E-01  | -2.8041E-02 |



|            |            |            |             |             |
|------------|------------|------------|-------------|-------------|
| CCNA_01272 | 5.7580E-05 | 1.4098E-04 | -1.2918E+00 | -1.0393E+00 |
| CCNA_01273 | 8.7706E-05 | 1.6234E-04 | -8.8830E-01 | -7.8195E-01 |
| CCNA_01274 | 1.0629E-04 | 1.5735E-04 | -5.6589E-01 | -5.7630E-01 |
| CCNA_01275 | 1.0157E-04 | 1.4615E-04 | -5.2501E-01 | -5.5023E-01 |
| CCNA_01276 | 6.3716E-05 | 1.4308E-04 | -1.1670E+00 | -9.5974E-01 |
| CCNA_01277 | 8.9523E-05 | 4.3756E-06 | 4.3521E+00  | 2.5606E+00  |
| CCNA_01278 | 1.4947E-04 | 9.9958E-05 | 5.8034E-01  | 1.5481E-01  |
| CCNA_01279 | 1.0590E-04 | 3.0687E-05 | 1.7866E+00  | 9.2424E-01  |
| CCNA_01280 | 1.3104E-04 | 1.4811E-04 | -1.7675E-01 | -3.2809E-01 |
| CCNA_01281 | 1.3198E-04 | 1.3349E-04 | -1.6460E-02 | -2.2585E-01 |
| CCNA_01282 | 4.2958E-05 | 9.6818E-05 | -1.1723E+00 | -9.6310E-01 |
| CCNA_01283 | 4.1751E-05 | 1.5060E-04 | -1.8508E+00 | -1.3958E+00 |
| CCNA_01284 | 6.0844E-05 | 5.8109E-05 | 6.6267E-02  | -1.7308E-01 |
| CCNA_01285 | 2.2642E-04 | 1.0096E-04 | 1.1651E+00  | 5.2781E-01  |
| CCNA_01286 | 1.9176E-04 | 1.6243E-04 | 2.3950E-01  | -6.2591E-02 |
| CCNA_01287 | 1.1545E-04 | 9.9362E-05 | 2.1645E-01  | -7.7292E-02 |
| CCNA_01288 | 1.1258E-04 | 1.2986E-04 | -2.0597E-01 | -3.4673E-01 |
| CCNA_01289 | 7.4582E-05 | 5.2449E-05 | 5.0779E-01  | 1.0854E-01  |
| CCNA_01290 | 7.2899E-05 | 8.1304E-05 | -1.5748E-01 | -3.1580E-01 |
| CCNA_01291 | 8.1047E-05 | 1.5286E-04 | -9.1540E-01 | -7.9923E-01 |
| CCNA_01292 | 5.8449E-05 | 7.6158E-05 | -3.8186E-01 | -4.5892E-01 |
| CCNA_01293 | 0.0000E+00 | 0.0000E+00 | -8.4168E-01 | -7.5221E-01 |
| CCNA_01294 | 0.0000E+00 | 0.0000E+00 | -8.4168E-01 | -7.5221E-01 |
| CCNA_01295 | 6.1820E-05 | 1.0104E-04 | -7.0873E-01 | -6.6741E-01 |
| CCNA_01296 | 1.4408E-04 | 1.0064E-04 | 5.1765E-01  | 1.1483E-01  |
| CCNA_01297 | 5.2232E-04 | 6.7056E-04 | -3.6044E-01 | -4.4525E-01 |
| CCNA_01298 | 2.8698E-04 | 1.9422E-04 | 5.6318E-01  | 1.4387E-01  |
| CCNA_01299 | 1.1739E-04 | 7.6771E-05 | 6.1255E-01  | 1.7536E-01  |
| CCNA_01300 | 7.0814E-05 | 6.1142E-05 | 2.1177E-01  | -8.0277E-02 |
| CCNA_01301 | 3.8302E-05 | 7.8114E-05 | -1.0282E+00 | -8.7115E-01 |
| CCNA_01302 | 5.5776E-05 | 1.1898E-04 | -1.0929E+00 | -9.1248E-01 |
| CCNA_01303 | 9.0753E-05 | 1.1884E-04 | -3.8909E-01 | -4.6353E-01 |
| CCNA_01304 | 2.6809E-04 | 3.6950E-04 | -4.6289E-01 | -5.1060E-01 |
| CCNA_01305 | 3.7677E-04 | 4.8889E-04 | -3.7581E-01 | -4.5506E-01 |
| CCNA_01306 | 1.4837E-04 | 1.3469E-04 | 1.3951E-01  | -1.2636E-01 |
| CCNA_01307 | 7.0527E-05 | 1.3819E-04 | -9.7045E-01 | -8.3434E-01 |
| CCNA_01308 | 7.4055E-05 | 9.4506E-05 | -3.5183E-01 | -4.3976E-01 |
| CCNA_01309 | 6.4419E-05 | 1.1801E-04 | -8.7333E-01 | -7.7240E-01 |
| CCNA_01310 | 6.3915E-05 | 1.0518E-04 | -7.1864E-01 | -6.7373E-01 |
| CCNA_01311 | 7.8268E-05 | 1.8016E-05 | 2.1186E+00  | 1.1360E+00  |
| CCNA_01312 | 8.4251E-05 | 1.3636E-04 | -6.9469E-01 | -6.5845E-01 |
| CCNA_01313 | 1.1693E-04 | 1.4960E-04 | -3.5552E-01 | -4.4212E-01 |
| CCNA_01314 | 6.6994E-05 | 2.7016E-06 | 4.6278E+00  | 2.7365E+00  |
| CCNA_01315 | 8.4330E-05 | 5.8904E-05 | 5.1755E-01  | 1.1476E-01  |
| CCNA_01316 | 1.2083E-04 | 1.1822E-04 | 3.1401E-02  | -1.9532E-01 |
| CCNA_01317 | 1.4240E-04 | 4.1974E-05 | 1.7621E+00  | 9.0862E-01  |
| CCNA_01318 | 8.3586E-05 | 8.9492E-05 | -9.8556E-02 | -2.7821E-01 |
| CCNA_01319 | 7.0092E-05 | 1.9176E-05 | 1.8694E+00  | 9.7704E-01  |
| CCNA_01320 | 7.1956E-05 | 6.8136E-05 | 7.8611E-02  | -1.6521E-01 |
| CCNA_01321 | 7.6992E-05 | 5.1148E-05 | 5.8989E-01  | 1.6090E-01  |
| CCNA_01322 | 8.0723E-05 | 1.3966E-04 | -7.9088E-01 | -7.1981E-01 |
| CCNA_01323 | 6.9255E-05 | 3.3397E-05 | 1.0520E+00  | 4.5563E-01  |
| CCNA_01324 | 8.6513E-05 | 3.9024E-05 | 1.1483E+00  | 5.1710E-01  |

|            |            |            |             |             |
|------------|------------|------------|-------------|-------------|
| CCNA_01325 | 1.4057E-04 | 1.6243E-04 | -2.0854E-01 | -3.4836E-01 |
| CCNA_01326 | 2.4054E-04 | 1.3876E-04 | 7.9366E-01  | 2.9088E-01  |
| CCNA_01327 | 1.0240E-04 | 1.4486E-04 | -5.0049E-01 | -5.3458E-01 |
| CCNA_01328 | 3.6959E-04 | 3.9245E-04 | -8.6587E-02 | -2.7058E-01 |
| CCNA_01329 | 1.2457E-04 | 1.2357E-04 | 1.1650E-02  | -2.0792E-01 |
| CCNA_01330 | 1.3958E-04 | 8.9417E-06 | 3.9631E+00  | 2.3125E+00  |
| CCNA_01331 | 9.6468E-05 | 1.1250E-04 | -2.2190E-01 | -3.5689E-01 |
| CCNA_01332 | 7.4744E-05 | 1.1921E-04 | -6.7347E-01 | -6.4492E-01 |
| CCNA_01333 | 4.5973E-05 | 1.7991E-05 | 1.3530E+00  | 6.4763E-01  |
| CCNA_01334 | 4.0498E-05 | 9.1762E-05 | -1.1800E+00 | -9.6802E-01 |
| CCNA_01335 | 2.0389E-04 | 1.4327E-04 | 5.0902E-01  | 1.0932E-01  |
| CCNA_01336 | 2.5505E-04 | 1.4316E-04 | 8.3310E-01  | 3.1603E-01  |
| CCNA_01337 | 6.9445E-05 | 2.5599E-05 | 1.4394E+00  | 7.0278E-01  |
| CCNA_01338 | 6.0548E-05 | 1.4337E-05 | 2.0777E+00  | 1.1099E+00  |
| CCNA_01339 | 4.5108E-05 | 1.2556E-04 | -1.4768E+00 | -1.1573E+00 |
| CCNA_01340 | 4.2907E-05 | 4.2156E-05 | 2.5346E-02  | -1.9918E-01 |
| CCNA_01341 | 9.2959E-05 | 1.5554E-04 | -7.4263E-01 | -6.8903E-01 |
| CCNA_01342 | 8.2443E-05 | 1.4351E-04 | -7.9965E-01 | -7.2540E-01 |
| CCNA_01343 | 6.1774E-05 | 1.1038E-05 | 2.4835E+00  | 1.3687E+00  |
| CCNA_01344 | 6.5158E-05 | 3.6488E-05 | 8.3631E-01  | 3.1808E-01  |
| CCNA_01345 | 4.3323E-05 | 9.6047E-06 | 2.1722E+00  | 1.1702E+00  |
| CCNA_01346 | 4.6357E-05 | 3.1913E-05 | 5.3839E-01  | 1.2805E-01  |
| CCNA_01347 | 6.1607E-05 | 3.6007E-05 | 7.7459E-01  | 2.7871E-01  |
| CCNA_01348 | 5.6146E-05 | 5.2830E-05 | 8.7722E-02  | -1.5940E-01 |
| CCNA_01349 | 4.2311E-05 | 3.0662E-07 | 7.0701E+00  | 4.2943E+00  |
| CCNA_01350 | 0.0000E+00 | 0.0000E+00 | -8.4168E-01 | -7.5221E-01 |
| CCNA_01351 | 7.0587E-05 | 4.3689E-05 | 6.9195E-01  | 2.2600E-01  |
| CCNA_01352 | 1.2941E-04 | 1.4505E-04 | -1.6466E-01 | -3.2038E-01 |
| CCNA_01353 | 5.0662E-05 | 7.1923E-05 | -5.0559E-01 | -5.3784E-01 |
| CCNA_01354 | 2.6434E-04 | 7.4998E-05 | 1.8174E+00  | 9.4383E-01  |
| CCNA_01355 | 2.4789E-04 | 6.3081E-05 | 1.9743E+00  | 1.0439E+00  |
| CCNA_01356 | 1.0261E-04 | 1.1496E-04 | -1.6398E-01 | -3.1995E-01 |
| CCNA_01357 | 5.7325E-05 | 1.2886E-05 | 2.1525E+00  | 1.1576E+00  |
| CCNA_01358 | 5.6123E-05 | 6.0636E-05 | -1.1167E-01 | -2.8658E-01 |
| CCNA_01359 | 5.4389E-05 | 8.8158E-05 | -6.9679E-01 | -6.5979E-01 |
| CCNA_01360 | 5.9101E-05 | 9.0403E-05 | -6.1322E-01 | -6.0649E-01 |
| CCNA_01361 | 8.3516E-05 | 1.2658E-04 | -5.9999E-01 | -5.9805E-01 |
| CCNA_01362 | 6.5515E-05 | 3.4051E-05 | 9.4385E-01  | 3.8667E-01  |
| CCNA_01363 | 4.9117E-05 | 4.1966E-05 | 2.2688E-01  | -7.0640E-02 |
| CCNA_01364 | 5.8125E-05 | 1.0399E-04 | -8.3915E-01 | -7.5060E-01 |
| CCNA_01365 | 8.2379E-05 | 4.0275E-06 | 4.3514E+00  | 2.5602E+00  |
| CCNA_01366 | 1.0844E-04 | 1.1370E-04 | -6.8354E-02 | -2.5895E-01 |
| CCNA_01367 | 1.1279E-04 | 1.5442E-04 | -4.5323E-01 | -5.0444E-01 |
| CCNA_01368 | 1.2216E-04 | 1.2866E-04 | -7.4828E-02 | -2.6308E-01 |
| CCNA_01369 | 6.3896E-05 | 4.4419E-05 | 5.2440E-01  | 1.1913E-01  |
| CCNA_01370 | 1.1087E-04 | 1.2350E-04 | -1.5567E-01 | -3.1464E-01 |
| CCNA_01371 | 2.0857E-04 | 1.4779E-04 | 4.9690E-01  | 1.0159E-01  |
| CCNA_01372 | 9.9192E-05 | 1.2298E-04 | -3.1016E-01 | -4.1318E-01 |
| CCNA_01373 | 1.0415E-04 | 1.5658E-04 | -5.8823E-01 | -5.9055E-01 |
| CCNA_01374 | 6.2782E-05 | 1.0722E-04 | -7.7213E-01 | -7.0785E-01 |
| CCNA_01375 | 7.9706E-05 | 8.5000E-05 | -9.2837E-02 | -2.7457E-01 |
| CCNA_01376 | 5.7020E-05 | 1.3418E-04 | -1.2346E+00 | -1.0029E+00 |
| CCNA_01377 | 3.9565E-04 | 1.6262E-04 | 1.2827E+00  | 6.0281E-01  |

|            |            |            |             |             |
|------------|------------|------------|-------------|-------------|
| CCNA_01378 | 3.8541E-04 | 1.6276E-04 | 1.2436E+00  | 5.7788E-01  |
| CCNA_01379 | 1.4434E-04 | 1.6242E-04 | -1.7025E-01 | -3.2394E-01 |
| CCNA_01380 | 2.2271E-04 | 3.8410E-05 | 2.5353E+00  | 1.4018E+00  |
| CCNA_01381 | 6.8215E-05 | 3.9438E-05 | 7.9030E-01  | 2.8873E-01  |
| CCNA_01382 | 9.2866E-05 | 5.6824E-05 | 7.0851E-01  | 2.3656E-01  |
| CCNA_01383 | 7.3061E-05 | 1.5924E-04 | -1.1240E+00 | -9.3227E-01 |
| CCNA_01384 | 1.2735E-04 | 1.6243E-04 | -3.5103E-01 | -4.3925E-01 |
| CCNA_01385 | 1.6559E-04 | 1.2724E-04 | 3.8001E-01  | 2.7038E-02  |
| CCNA_01386 | 8.5125E-05 | 8.8017E-05 | -4.8245E-02 | -2.4612E-01 |
| CCNA_01387 | 8.7604E-05 | 1.5914E-04 | -8.6127E-01 | -7.6470E-01 |
| CCNA_01388 | 1.0546E-04 | 6.4109E-05 | 7.1801E-01  | 2.4263E-01  |
| CCNA_01389 | 1.3965E-04 | 1.5389E-04 | -1.4009E-01 | -3.0470E-01 |
| CCNA_01390 | 6.0451E-05 | 5.2681E-05 | 1.9838E-01  | -8.8819E-02 |
| CCNA_01391 | 6.8187E-05 | 4.8239E-05 | 4.9916E-01  | 1.0303E-01  |
| CCNA_01392 | 8.3720E-05 | 1.0738E-04 | -3.5917E-01 | -4.4444E-01 |
| CCNA_01393 | 1.7245E-04 | 1.6243E-04 | 8.6375E-02  | -1.6026E-01 |
| CCNA_01394 | 2.2091E-04 | 1.1515E-04 | 9.3988E-01  | 3.8414E-01  |
| CCNA_01395 | 2.0846E-04 | 1.2798E-04 | 7.0386E-01  | 2.3360E-01  |
| CCNA_01396 | 9.5470E-05 | 3.5270E-05 | 1.4363E+00  | 7.0081E-01  |
| CCNA_01397 | 1.0748E-04 | 7.1666E-05 | 5.8457E-01  | 1.5751E-01  |
| CCNA_01398 | 5.1675E-05 | 5.1537E-05 | 3.7378E-03  | -2.1297E-01 |
| CCNA_01399 | 4.5696E-05 | 6.6073E-05 | -5.3203E-01 | -5.5471E-01 |
| CCNA_01400 | 5.2331E-05 | 1.1309E-04 | -1.1116E+00 | -9.2440E-01 |
| CCNA_01401 | 6.5926E-05 | 1.6276E-04 | -1.3038E+00 | -1.0470E+00 |
| CCNA_01402 | 6.8594E-05 | 1.5667E-04 | -1.1916E+00 | -9.7540E-01 |
| CCNA_01403 | 6.3646E-05 | 1.6276E-04 | -1.3545E+00 | -1.0793E+00 |
| CCNA_01404 | 6.1912E-05 | 7.0332E-05 | -1.8402E-01 | -3.3273E-01 |
| CCNA_01405 | 1.5364E-04 | 2.3635E-05 | 2.7001E+00  | 1.5069E+00  |
| CCNA_01406 | 8.5213E-05 | 8.1014E-05 | 7.2834E-02  | -1.6889E-01 |
| CCNA_01407 | 9.7911E-05 | 1.6275E-04 | -7.3311E-01 | -6.8296E-01 |
| CCNA_01408 | 6.3637E-05 | 1.0536E-04 | -7.2742E-01 | -6.7933E-01 |
| CCNA_01409 | 1.3461E-04 | 1.1875E-04 | 1.8075E-01  | -1.0006E-01 |
| CCNA_01410 | 3.5035E-04 | 4.3366E-05 | 3.0139E+00  | 1.7070E+00  |
| CCNA_04014 | 1.9774E-04 | 1.4511E-04 | 4.4646E-01  | 6.9417E-02  |
| CCNA_01412 | 1.9144E-04 | 1.6014E-04 | 2.5755E-01  | -5.1074E-02 |
| CCNA_01413 | 7.3283E-05 | 8.2183E-05 | -1.6541E-01 | -3.2086E-01 |
| CCNA_01414 | 6.5672E-05 | 2.3378E-05 | 1.4897E+00  | 7.3486E-01  |
| CCNA_01415 | 1.8332E-04 | 1.6130E-04 | 1.8458E-01  | -9.7621E-02 |
| CCNA_01416 | 4.1145E-05 | 8.7760E-06 | 2.2279E+00  | 1.2057E+00  |
| CCNA_01417 | 4.6039E-04 | 1.6243E-04 | 1.5030E+00  | 7.4333E-01  |
| CCNA_01418 | 1.8786E-04 | 1.5144E-04 | 3.1089E-01  | -1.7054E-02 |
| CCNA_01419 | 2.0696E-04 | 1.6243E-04 | 3.4954E-01  | 7.5989E-03  |
| CCNA_01420 | 1.2602E-04 | 1.6238E-04 | -3.6577E-01 | -4.4866E-01 |
| CCNA_01421 | 1.2972E-04 | 1.6243E-04 | -3.2440E-01 | -4.2227E-01 |
| CCNA_01422 | 1.6986E-04 | 9.8922E-05 | 7.7991E-01  | 2.8211E-01  |
| CCNA_01423 | 1.4196E-04 | 5.9228E-05 | 1.2610E+00  | 5.8896E-01  |
| CCNA_01424 | 9.5363E-05 | 1.4537E-04 | -6.0825E-01 | -6.0332E-01 |
| CCNA_01425 | 4.3318E-04 | 1.5412E-04 | 1.4908E+00  | 7.3557E-01  |
| CCNA_01426 | 7.8120E-05 | 1.2182E-05 | 2.6800E+00  | 1.4941E+00  |
| CCNA_01427 | 1.5879E-04 | 1.6243E-04 | -3.2675E-02 | -2.3619E-01 |
| CCNA_01428 | 1.1324E-04 | 1.3526E-04 | -2.5645E-01 | -3.7893E-01 |
| CCNA_01429 | 1.5416E-04 | 1.9337E-04 | -3.2696E-01 | -4.2390E-01 |
| CCNA_01430 | 8.3202E-05 | 1.6258E-04 | -9.6642E-01 | -8.3177E-01 |

|            |            |            |             |             |
|------------|------------|------------|-------------|-------------|
| CCNA_01431 | 2.2915E-04 | 1.4927E-04 | 6.1829E-01  | 1.7902E-01  |
| CCNA_01432 | 6.4506E-05 | 1.0454E-04 | -6.9657E-01 | -6.5965E-01 |
| CCNA_01433 | 2.4978E-04 | 1.0337E-04 | 1.2727E+00  | 5.9644E-01  |
| CCNA_01434 | 1.0532E-04 | 1.1311E-04 | -1.0294E-01 | -2.8101E-01 |
| CCNA_01435 | 1.7962E-04 | 1.0347E-04 | 7.9562E-01  | 2.9213E-01  |
| CCNA_01436 | 2.0598E-04 | 3.1574E-04 | -6.1628E-01 | -6.0844E-01 |
| CCNA_01437 | 3.7266E-04 | 1.6236E-04 | 1.1986E+00  | 5.4918E-01  |
| CCNA_01438 | 3.4906E-04 | 1.5126E-04 | 1.2063E+00  | 5.5410E-01  |
| CCNA_01439 | 1.4438E-04 | 1.5972E-04 | -1.4563E-01 | -3.0824E-01 |
| CCNA_01440 | 1.4097E-04 | 1.5568E-04 | -1.4327E-01 | -3.0673E-01 |
| CCNA_01441 | 7.9498E-05 | 6.2244E-05 | 3.5287E-01  | 9.7254E-03  |
| CCNA_01442 | 6.4719E-05 | 1.9243E-05 | 1.7494E+00  | 9.0047E-01  |
| CCNA_01443 | 8.0705E-05 | 1.4344E-04 | -8.2973E-01 | -7.4459E-01 |
| CCNA_01444 | 2.8003E-04 | 1.5271E-04 | 8.7468E-01  | 3.4256E-01  |
| CCNA_01445 | 2.4643E-04 | 8.3848E-05 | 1.5552E+00  | 7.7664E-01  |
| CCNA_01446 | 7.7436E-05 | 1.2611E-04 | -7.0365E-01 | -6.6417E-01 |
| CCNA_01447 | 1.1778E-04 | 5.6833E-05 | 1.0511E+00  | 4.5509E-01  |
| CCNA_01448 | 2.0749E-04 | 1.2180E-04 | 7.6845E-01  | 2.7480E-01  |
| CCNA_01449 | 5.7700E-05 | 1.4410E-04 | -1.3204E+00 | -1.0575E+00 |
| CCNA_01450 | 1.6385E-04 | 5.3261E-05 | 1.6211E+00  | 8.1862E-01  |
| CCNA_01451 | 2.0987E-04 | 8.6011E-05 | 1.2868E+00  | 6.0542E-01  |
| CCNA_01452 | 8.1625E-05 | 8.5199E-05 | -6.1887E-02 | -2.5483E-01 |
| CCNA_01453 | 1.3971E-04 | 3.6526E-04 | -1.3864E+00 | -1.0997E+00 |
| CCNA_01454 | 6.5200E-05 | 0.0000E+00 | 1.2942E+01  | 8.0395E+00  |
| CCNA_01455 | 7.0083E-05 | 3.2402E-06 | 4.4313E+00  | 2.6111E+00  |
| CCNA_01456 | 9.5599E-05 | 1.3973E-04 | -5.4757E-01 | -5.6461E-01 |
| CCNA_01457 | 6.9672E-05 | 8.8754E-06 | 2.9714E+00  | 1.6800E+00  |
| CCNA_01458 | 8.9222E-05 | 1.1304E-04 | -3.4133E-01 | -4.3306E-01 |
| CCNA_01459 | 1.1043E-04 | 8.7909E-05 | 3.2902E-01  | -5.4915E-03 |
| CCNA_01460 | 6.7535E-05 | 6.5567E-05 | 4.2585E-02  | -1.8819E-01 |
| CCNA_01461 | 8.2124E-05 | 1.1428E-04 | -4.7669E-01 | -5.1941E-01 |
| CCNA_01462 | 4.9182E-05 | 3.7872E-06 | 3.6959E+00  | 2.1421E+00  |
| CCNA_01463 | 2.6932E-04 | 2.5888E-04 | 5.7011E-02  | -1.7899E-01 |
| CCNA_01464 | 1.8503E-04 | 1.4312E-04 | 3.7055E-01  | 2.0998E-02  |
| CCNA_01465 | 1.7762E-04 | 1.5719E-04 | 1.7623E-01  | -1.0294E-01 |
| CCNA_01466 | 9.4387E-04 | 2.2135E-05 | 5.4137E+00  | 3.2377E+00  |
| CCNA_01467 | 1.5098E-03 | 1.1777E-04 | 3.6803E+00  | 2.1321E+00  |
| CCNA_01468 | 7.3292E-05 | 6.3346E-05 | 2.1031E-01  | -8.1210E-02 |
| CCNA_01469 | 7.8906E-05 | 3.7176E-05 | 1.0855E+00  | 4.7705E-01  |
| CCNA_01470 | 6.6185E-05 | 6.4730E-05 | 3.1983E-02  | -1.9495E-01 |
| CCNA_01471 | 4.3753E-05 | 8.1528E-05 | -8.9789E-01 | -7.8807E-01 |
| CCNA_01472 | 6.0132E-05 | 2.0983E-05 | 1.5185E+00  | 7.5319E-01  |
| CCNA_01473 | 4.7943E-05 | 9.9577E-05 | -1.0545E+00 | -8.8794E-01 |
| CCNA_01474 | 1.3451E-04 | 9.7456E-06 | 3.7856E+00  | 2.1993E+00  |
| CCNA_01475 | 3.0372E-04 | 1.0051E-04 | 1.5954E+00  | 8.0223E-01  |
| CCNA_01476 | 7.7664E-04 | 1.0587E-04 | 2.8749E+00  | 1.6184E+00  |
| CCNA_01477 | 8.0917E-05 | 1.0372E-04 | -3.5821E-01 | -4.4384E-01 |
| CCNA_01478 | 1.5422E-04 | 1.1667E-04 | 4.0245E-01  | 4.1346E-02  |
| CCNA_01479 | 1.7959E-04 | 5.3733E-05 | 1.7406E+00  | 8.9491E-01  |
| CCNA_01480 | 1.2141E-04 | 1.3251E-05 | 3.1948E+00  | 1.8224E+00  |
| CCNA_01481 | 1.2873E-04 | 1.3083E-04 | -2.3349E-02 | -2.3024E-01 |
| CCNA_01482 | 1.1654E-04 | 6.5161E-05 | 8.3864E-01  | 3.1957E-01  |
| CCNA_01483 | 5.2627E-05 | 8.6301E-05 | -7.1359E-01 | -6.7051E-01 |

|            |            |            |             |             |
|------------|------------|------------|-------------|-------------|
| CCNA_01484 | 1.0211E-04 | 4.7186E-05 | 1.1134E+00  | 4.9484E-01  |
| CCNA_01485 | 5.6706E-05 | 1.4347E-04 | -1.3391E+00 | -1.0695E+00 |
| CCNA_01486 | 1.4692E-04 | 7.9183E-05 | 8.9164E-01  | 3.5338E-01  |
| CCNA_01487 | 1.4844E-04 | 9.1340E-05 | 7.0051E-01  | 2.3146E-01  |
| CCNA_01488 | 1.1022E-04 | 3.5079E-05 | 1.6514E+00  | 8.3800E-01  |
| CCNA_01489 | 6.0211E-05 | 8.0542E-05 | -4.1976E-01 | -4.8309E-01 |
| CCNA_01490 | 6.4553E-05 | 1.5032E-04 | -1.2195E+00 | -9.9317E-01 |
| CCNA_01491 | 7.1697E-05 | 8.5348E-05 | -2.5150E-01 | -3.7577E-01 |
| CCNA_01492 | 3.3583E-04 | 1.4246E-04 | 1.2371E+00  | 5.7372E-01  |
| CCNA_01493 | 5.1291E-05 | 5.1015E-05 | 7.6704E-03  | -2.1046E-01 |
| CCNA_01494 | 6.4187E-05 | 1.2901E-04 | -1.0071E+00 | -8.5775E-01 |
| CCNA_01495 | 1.4325E-04 | 1.5039E-04 | -7.0200E-02 | -2.6013E-01 |
| CCNA_01496 | 1.5893E-04 | 1.5695E-04 | 1.8034E-02  | -2.0385E-01 |
| CCNA_01497 | 5.5300E-05 | 1.4966E-04 | -1.4363E+00 | -1.1315E+00 |
| CCNA_01498 | 7.9734E-05 | 2.7331E-05 | 1.5443E+00  | 7.6968E-01  |
| CCNA_01499 | 4.7198E-05 | 1.1644E-04 | -1.3028E+00 | -1.0463E+00 |
| CCNA_01500 | 6.9084E-05 | 8.5009E-05 | -2.9929E-01 | -4.0625E-01 |
| CCNA_01501 | 9.5252E-05 | 1.3072E-04 | -4.5668E-01 | -5.0664E-01 |
| CCNA_01503 | 7.6668E-05 | 8.4263E-05 | -1.3633E-01 | -3.0231E-01 |
| CCNA_01502 | 7.8161E-05 | 1.6243E-04 | -1.0552E+00 | -8.8843E-01 |
| CCNA_01504 | 1.4328E-04 | 9.5856E-05 | 5.7984E-01  | 1.5450E-01  |
| CCNA_01505 | 8.9185E-05 | 1.6330E-04 | -8.7268E-01 | -7.7199E-01 |
| CCNA_01506 | 4.8095E-05 | 1.2714E-04 | -1.4024E+00 | -1.1099E+00 |
| CCNA_01507 | 1.7356E-04 | 1.4664E-04 | 2.4310E-01  | -6.0295E-02 |
| CCNA_01508 | 1.6132E-04 | 1.5985E-04 | 1.3157E-02  | -2.0696E-01 |
| CCNA_01509 | 1.1178E-04 | 1.4735E-04 | -3.9864E-01 | -4.6962E-01 |
| CCNA_01510 | 1.1082E-04 | 1.5023E-04 | -4.3899E-01 | -4.9536E-01 |
| CCNA_01511 | 5.8953E-05 | 2.7596E-05 | 1.0948E+00  | 4.8295E-01  |
| CCNA_01512 | 6.0511E-05 | 9.3171E-05 | -6.2270E-01 | -6.1254E-01 |
| CCNA_01513 | 8.1065E-05 | 1.5846E-04 | -9.6692E-01 | -8.3210E-01 |
| CCNA_01514 | 7.8564E-05 | 6.1448E-05 | 3.5438E-01  | 1.0686E-02  |
| CCNA_01515 | 5.6123E-05 | 9.4025E-05 | -7.4446E-01 | -6.9020E-01 |
| CCNA_01516 | 4.8632E-05 | 4.5272E-05 | 1.0315E-01  | -1.4956E-01 |
| CCNA_01517 | 8.1172E-05 | 1.3448E-04 | -7.2837E-01 | -6.7994E-01 |
| CCNA_04008 | 4.8116E-04 | 1.2590E-04 | 1.9342E+00  | 1.0184E+00  |
| CCNA_01519 | 4.1692E-04 | 9.4298E-05 | 2.1443E+00  | 1.1524E+00  |
| CCNA_01520 | 6.0835E-05 | 6.6744E-05 | -1.3381E-01 | -3.0070E-01 |
| CCNA_01521 | 7.6649E-05 | 9.4564E-05 | -3.0305E-01 | -4.0865E-01 |
| CCNA_01522 | 1.1825E-04 | 1.9709E-04 | -7.3699E-01 | -6.8544E-01 |
| CCNA_01523 | 9.0768E-04 | 6.9015E-05 | 3.7170E+00  | 2.1555E+00  |
| CCNA_01524 | 4.8213E-04 | 1.1843E-04 | 2.0253E+00  | 1.0765E+00  |
| CCNA_01525 | 4.8266E-04 | 1.1842E-04 | 2.0270E+00  | 1.0775E+00  |
| CCNA_01526 | 2.3094E-04 | 1.2410E-04 | 8.9595E-01  | 3.5612E-01  |
| CCNA_01527 | 1.0170E-04 | 6.4059E-05 | 6.6677E-01  | 2.0994E-01  |
| CCNA_01528 | 6.7027E-05 | 2.4944E-06 | 4.7433E+00  | 2.8101E+00  |
| CCNA_01529 | 1.7021E-04 | 1.8977E-05 | 3.1644E+00  | 1.8030E+00  |
| CCNA_01530 | 2.8170E-04 | 1.4371E-04 | 9.7097E-01  | 4.0397E-01  |
| CCNA_01531 | 4.0481E-04 | 7.1443E-05 | 2.5022E+00  | 1.3807E+00  |
| CCNA_01532 | 6.9790E-04 | 2.3795E-04 | 1.5523E+00  | 7.7477E-01  |
| CCNA_01533 | 1.4988E-04 | 1.1628E-04 | 3.6607E-01  | 1.8143E-02  |
| CCNA_01534 | 1.2944E-04 | 7.5561E-05 | 7.7644E-01  | 2.7989E-01  |
| CCNA_01535 | 2.7441E-04 | 7.6780E-05 | 1.8374E+00  | 9.5662E-01  |
| CCNA_01536 | 1.0092E-04 | 4.1435E-06 | 4.6033E+00  | 2.7209E+00  |

|            |            |            |             |             |
|------------|------------|------------|-------------|-------------|
| CCNA_01537 | 3.0095E-04 | 1.5788E-04 | 9.3068E-01  | 3.7828E-01  |
| CCNA_01538 | 2.8639E-04 | 1.6243E-04 | 8.1817E-01  | 3.0651E-01  |
| CCNA_01539 | 8.2379E-05 | 4.5173E-05 | 8.6664E-01  | 3.3743E-01  |
| CCNA_01540 | 7.7759E-05 | 3.0115E-05 | 1.3682E+00  | 6.5735E-01  |
| CCNA_01541 | 8.4945E-05 | 1.6176E-05 | 2.3920E+00  | 1.3104E+00  |
| CCNA_01542 | 4.6497E-04 | 3.8236E-05 | 3.6038E+00  | 2.0833E+00  |
| CCNA_01543 | 7.2959E-05 | 1.4238E-04 | -9.6457E-01 | -8.3060E-01 |
| CCNA_01544 | 6.7480E-05 | 1.4326E-04 | -1.0861E+00 | -9.0810E-01 |
| CCNA_01545 | 7.6645E-05 | 1.5625E-04 | -1.0276E+00 | -8.7080E-01 |
| CCNA_01546 | 2.2319E-04 | 2.0239E-04 | 1.4109E-01  | -1.2536E-01 |
| CCNA_01547 | 1.0696E-04 | 7.8163E-05 | 4.5242E-01  | 7.3222E-02  |
| CCNA_01548 | 5.7311E-05 | 2.9626E-05 | 9.5166E-01  | 3.9166E-01  |
| CCNA_01549 | 6.4654E-05 | 1.0150E-04 | -6.5067E-01 | -6.3038E-01 |
| CCNA_01550 | 9.6718E-05 | 1.3051E-04 | -4.3236E-01 | -4.9113E-01 |
| CCNA_01551 | 9.9812E-05 | 1.2208E-04 | -2.9063E-01 | -4.0073E-01 |
| CCNA_01552 | 2.2161E-04 | 1.6243E-04 | 4.4817E-01  | 7.0511E-02  |
| CCNA_01553 | 5.4181E-05 | 1.2646E-05 | 2.0983E+00  | 1.1230E+00  |
| CCNA_01554 | 5.1503E-05 | 7.5760E-05 | -5.5680E-01 | -5.7050E-01 |
| CCNA_01555 | 4.6973E-04 | 8.0434E-05 | 2.5458E+00  | 1.4085E+00  |
| CCNA_01556 | 4.9104E-04 | 1.0196E-04 | 2.2678E+00  | 1.2311E+00  |
| CCNA_01557 | 7.6095E-05 | 1.3741E-04 | -8.5260E-01 | -7.5917E-01 |
| CCNA_01558 | 6.4127E-05 | 1.3407E-04 | -1.0639E+00 | -8.9398E-01 |
| CCNA_01559 | 4.5862E-05 | 9.8458E-05 | -1.1022E+00 | -9.1838E-01 |
| CCNA_01560 | 4.6422E-05 | 4.6548E-05 | -4.0489E-03 | -2.1793E-01 |
| CCNA_01561 | 1.0044E-04 | 1.1161E-04 | -1.5217E-01 | -3.1241E-01 |
| CCNA_01562 | 6.2907E-05 | 5.9112E-05 | 8.9674E-02  | -1.5815E-01 |
| CCNA_01563 | 5.9156E-05 | 8.7055E-05 | -5.5743E-01 | -5.7090E-01 |
| CCNA_01564 | 3.5407E-05 | 1.0156E-04 | -1.5201E+00 | -1.1850E+00 |
| CCNA_01565 | 4.8433E-05 | 6.2236E-06 | 2.9584E+00  | 1.6716E+00  |
| CCNA_01566 | 6.8442E-05 | 1.2300E-04 | -8.4567E-01 | -7.5476E-01 |
| CCNA_01567 | 7.9160E-05 | 1.1285E-04 | -5.1162E-01 | -5.4168E-01 |
| CCNA_01568 | 1.0026E-04 | 2.5682E-05 | 1.9645E+00  | 1.0377E+00  |
| CCNA_01569 | 4.1446E-05 | 6.4092E-05 | -6.2894E-01 | -6.1651E-01 |
| CCNA_01570 | 4.4410E-05 | 1.0206E-04 | -1.2004E+00 | -9.8099E-01 |
| CCNA_01571 | 5.2807E-05 | 1.2558E-04 | -1.2498E+00 | -1.0125E+00 |
| CCNA_01572 | 5.8971E-05 | 5.4164E-05 | 1.2257E-01  | -1.3717E-01 |
| CCNA_01573 | 7.2072E-05 | 1.2874E-04 | -8.3695E-01 | -7.4919E-01 |
| CCNA_01574 | 7.5082E-05 | 1.3862E-04 | -8.8457E-01 | -7.7957E-01 |
| CCNA_01575 | 7.2668E-05 | 4.3391E-05 | 7.4374E-01  | 2.5904E-01  |
| CCNA_01576 | 8.6952E-05 | 8.1619E-05 | 9.1241E-02  | -1.5715E-01 |
| CCNA_01577 | 2.1115E-04 | 1.8763E-04 | 1.7034E-01  | -1.0670E-01 |
| CCNA_01578 | 2.1018E-04 | 1.9230E-04 | 1.2820E-01  | -1.3358E-01 |
| CCNA_01579 | 7.0564E-05 | 1.3009E-04 | -8.8250E-01 | -7.7825E-01 |
| CCNA_01580 | 1.1546E-04 | 1.2325E-04 | -9.4334E-02 | -2.7552E-01 |
| CCNA_01581 | 1.0269E-04 | 1.6243E-04 | -6.6146E-01 | -6.3726E-01 |
| CCNA_01582 | 4.4863E-05 | 2.6403E-05 | 7.6455E-01  | 2.7231E-01  |
| CCNA_01583 | 1.0456E-04 | 8.1420E-05 | 3.6080E-01  | 1.4780E-02  |
| CCNA_01584 | 6.6708E-05 | 1.7651E-06 | 5.2333E+00  | 3.1227E+00  |
| CCNA_01585 | 6.4881E-05 | 1.0302E-04 | -6.6713E-01 | -6.4088E-01 |
| CCNA_01586 | 6.3272E-05 | 8.2663E-05 | -3.8572E-01 | -4.6138E-01 |
| CCNA_01587 | 5.1642E-05 | 2.5193E-05 | 1.0352E+00  | 4.4494E-01  |
| CCNA_01588 | 5.5822E-05 | 6.3827E-05 | -1.9339E-01 | -3.3870E-01 |
| CCNA_01589 | 1.2631E-04 | 7.9713E-05 | 6.6396E-01  | 2.0815E-01  |

|            |            |            |             |             |
|------------|------------|------------|-------------|-------------|
| CCNA_01590 | 1.1743E-04 | 1.0640E-04 | 1.4228E-01  | -1.2460E-01 |
| CCNA_01591 | 5.4389E-05 | 1.5816E-04 | -1.5399E+00 | -1.1976E+00 |
| CCNA_01592 | 5.5929E-05 | 1.4734E-04 | -1.3975E+00 | -1.1067E+00 |
| CCNA_01593 | 1.3902E-04 | 1.3810E-04 | 9.5454E-03  | -2.0926E-01 |
| CCNA_01594 | 8.7997E-05 | 6.7407E-05 | 3.8446E-01  | 2.9872E-02  |
| CCNA_01595 | 8.6332E-05 | 4.8637E-05 | 8.2769E-01  | 3.1258E-01  |
| CCNA_01596 | 2.3695E-04 | 7.4882E-05 | 1.6618E+00  | 8.4461E-01  |
| CCNA_01597 | 2.2660E-04 | 6.1109E-05 | 1.8905E+00  | 9.9049E-01  |
| CCNA_01598 | 2.2662E-04 | 2.9162E-05 | 2.9577E+00  | 1.6712E+00  |
| CCNA_01599 | 2.3675E-04 | 1.6243E-04 | 5.4357E-01  | 1.3136E-01  |
| CCNA_01600 | 9.6455E-05 | 9.7862E-05 | -2.0949E-02 | -2.2871E-01 |
| CCNA_01601 | 9.2552E-05 | 1.2968E-04 | -4.8669E-01 | -5.2578E-01 |
| CCNA_01602 | 7.4619E-05 | 1.3640E-05 | 2.4509E+00  | 1.3479E+00  |
| CCNA_01603 | 1.8929E-04 | 7.1012E-05 | 1.4143E+00  | 6.8676E-01  |
| CCNA_01604 | 1.9166E-04 | 4.6830E-05 | 2.0328E+00  | 1.0812E+00  |
| CCNA_01605 | 7.9068E-05 | 1.3471E-04 | -7.6866E-01 | -7.0563E-01 |
| CCNA_01606 | 2.9012E-04 | 1.6267E-04 | 8.3469E-01  | 3.1705E-01  |
| CCNA_01607 | 2.9205E-04 | 1.6267E-04 | 8.4423E-01  | 3.2313E-01  |
| CCNA_01608 | 3.9434E-05 | 8.5796E-05 | -1.1214E+00 | -9.3064E-01 |
| CCNA_01609 | 5.5540E-05 | 1.2218E-04 | -1.1374E+00 | -9.4085E-01 |
| CCNA_01610 | 1.0134E-04 | 1.1359E-04 | -1.6465E-01 | -3.2037E-01 |
| CCNA_01611 | 5.6447E-05 | 1.3158E-04 | -1.2210E+00 | -9.9414E-01 |
| CCNA_01612 | 2.6616E-04 | 1.2047E-04 | 1.1436E+00  | 5.1407E-01  |
| CCNA_01613 | 6.1552E-05 | 9.3901E-05 | -6.0935E-01 | -6.0402E-01 |
| CCNA_01614 | 4.2903E-05 | 4.4195E-05 | -4.2928E-02 | -2.4273E-01 |
| CCNA_01615 | 5.7575E-05 | 1.6029E-04 | -1.4771E+00 | -1.1575E+00 |
| CCNA_01616 | 4.8391E-05 | 4.0109E-06 | 3.5899E+00  | 2.0744E+00  |
| CCNA_01617 | 6.6042E-05 | 1.0056E-04 | -6.0655E-01 | -6.0224E-01 |
| CCNA_01618 | 5.9221E-05 | 5.7305E-05 | 4.7356E-02  | -1.8515E-01 |
| CCNA_01619 | 1.9523E-04 | 2.4389E-05 | 3.0005E+00  | 1.6985E+00  |
| CCNA_01620 | 1.7701E-04 | 8.6268E-05 | 1.0368E+00  | 4.4596E-01  |
| CCNA_01621 | 2.8438E-04 | 4.2449E-04 | -5.7791E-01 | -5.8397E-01 |
| CCNA_01622 | 2.3896E-04 | 5.0510E-05 | 2.2419E+00  | 1.2146E+00  |
| CCNA_01623 | 3.2073E-04 | 7.3166E-05 | 2.1320E+00  | 1.1445E+00  |
| CCNA_01624 | 2.9031E-04 | 7.3456E-05 | 1.9825E+00  | 1.0492E+00  |
| CCNA_01625 | 8.5181E-05 | 8.7321E-05 | -3.5851E-02 | -2.3822E-01 |
| CCNA_01626 | 8.3456E-05 | 8.0600E-05 | 5.0172E-02  | -1.8335E-01 |
| CCNA_01627 | 4.6297E-05 | 5.9335E-05 | -3.5804E-01 | -4.4372E-01 |
| CCNA_01628 | 4.8132E-05 | 9.8077E-05 | -1.0269E+00 | -8.7035E-01 |
| CCNA_01629 | 1.1157E-04 | 1.5782E-04 | -5.0032E-01 | -5.3448E-01 |
| CCNA_01630 | 9.1530E-05 | 1.1255E-04 | -2.9824E-01 | -4.0558E-01 |
| CCNA_01631 | 8.5491E-05 | 9.7646E-05 | -1.9184E-01 | -3.3772E-01 |
| CCNA_01632 | 1.7226E-04 | 1.6183E-04 | 9.0098E-02  | -1.5788E-01 |
| CCNA_01633 | 1.7294E-04 | 1.4194E-04 | 2.8492E-01  | -3.3619E-02 |
| CCNA_01634 | 6.6536E-05 | 1.2180E-04 | -8.7233E-01 | -7.7176E-01 |
| CCNA_01635 | 6.5829E-05 | 1.9549E-05 | 1.7511E+00  | 9.0158E-01  |
| CCNA_01636 | 6.4752E-05 | 3.0074E-05 | 1.1061E+00  | 4.9018E-01  |
| CCNA_01637 | 5.8185E-04 | 1.4240E-04 | 2.0307E+00  | 1.0799E+00  |
| CCNA_01638 | 5.6410E-05 | 6.3205E-05 | -1.6418E-01 | -3.2007E-01 |
| CCNA_01639 | 4.6699E-05 | 1.0549E-05 | 2.1452E+00  | 1.1530E+00  |
| CCNA_01640 | 5.5901E-05 | 1.3814E-04 | -1.3051E+00 | -1.0478E+00 |
| CCNA_01641 | 5.4532E-05 | 1.0611E-04 | -9.6033E-01 | -8.2789E-01 |
| CCNA_01642 | 4.3097E-05 | 8.3359E-05 | -9.5175E-01 | -8.2242E-01 |

|            |            |            |             |             |
|------------|------------|------------|-------------|-------------|
| CCNA_01643 | 8.0238E-05 | 2.9651E-05 | 1.4359E+00  | 7.0051E-01  |
| CCNA_01644 | 1.4624E-04 | 1.7124E-04 | -2.2776E-01 | -3.6063E-01 |
| CCNA_01645 | 1.5399E-04 | 1.6243E-04 | -7.6955E-02 | -2.6444E-01 |
| CCNA_01646 | 4.1427E-05 | 1.3069E-05 | 1.6637E+00  | 8.4584E-01  |
| CCNA_01647 | 7.6483E-05 | 1.3275E-04 | -7.9551E-01 | -7.2276E-01 |
| CCNA_01648 | 7.1979E-05 | 7.3092E-05 | -2.2203E-02 | -2.2951E-01 |
| CCNA_01649 | 6.8118E-05 | 5.5962E-05 | 2.8346E-01  | -3.4549E-02 |
| CCNA_01650 | 2.8863E-04 | 6.4813E-05 | 2.1547E+00  | 1.1590E+00  |
| CCNA_01651 | 2.6991E-04 | 8.8630E-05 | 1.6065E+00  | 8.0934E-01  |
| CCNA_01652 | 1.0559E-04 | 1.6142E-04 | -6.1235E-01 | -6.0594E-01 |
| CCNA_01653 | 8.5583E-05 | 1.1322E-04 | -4.0373E-01 | -4.7287E-01 |
| CCNA_01654 | 8.9671E-05 | 1.3409E-04 | -5.8053E-01 | -5.8564E-01 |
| CCNA_01655 | 1.3925E-04 | 1.0849E-04 | 3.6007E-01  | 1.4316E-02  |
| CCNA_01656 | 9.2547E-05 | 2.7985E-05 | 1.7252E+00  | 8.8503E-01  |
| CCNA_01657 | 2.1579E-04 | 7.4318E-05 | 1.5377E+00  | 7.6546E-01  |
| CCNA_01658 | 1.6977E-04 | 9.8392E-05 | 7.8692E-01  | 2.8658E-01  |
| CCNA_01659 | 7.7135E-05 | 1.1310E-04 | -5.5218E-01 | -5.6756E-01 |
| CCNA_01660 | 3.9015E-04 | 4.8933E-04 | -3.2679E-01 | -4.2379E-01 |
| CCNA_01661 | 1.5134E-04 | 1.0776E-04 | 4.8982E-01  | 9.7078E-02  |
| CCNA_01662 | 3.3343E-04 | 3.4115E-04 | -3.3044E-02 | -2.3643E-01 |
| CCNA_01663 | 1.1210E-04 | 1.6150E-04 | -5.2677E-01 | -5.5135E-01 |
| CCNA_01664 | 4.8151E-05 | 1.3199E-04 | -1.4547E+00 | -1.1432E+00 |
| CCNA_01665 | 1.3597E-04 | 3.1557E-05 | 2.1069E+00  | 1.1285E+00  |
| CCNA_01666 | 4.9460E-05 | 5.7902E-05 | -2.2742E-01 | -3.6041E-01 |
| CCNA_01667 | 8.2406E-05 | 4.2165E-05 | 9.6653E-01  | 4.0114E-01  |
| CCNA_01668 | 1.8650E-04 | 1.5314E-05 | 3.6054E+00  | 2.0843E+00  |
| CCNA_01669 | 4.8687E-05 | 4.8993E-05 | -9.1364E-03 | -2.2118E-01 |
| CCNA_01670 | 6.7887E-05 | 6.2136E-05 | 1.2760E-01  | -1.3396E-01 |
| CCNA_01671 | 1.4438E-04 | 1.1833E-04 | 2.8698E-01  | -3.2304E-02 |
| CCNA_01672 | 8.7840E-05 | 5.7106E-05 | 6.2110E-01  | 1.8081E-01  |
| CCNA_01673 | 6.5778E-05 | 1.3418E-04 | -1.0284E+00 | -8.7133E-01 |
| CCNA_01674 | 1.7268E-04 | 1.6281E-04 | 8.4888E-02  | -1.6121E-01 |
| CCNA_01675 | 1.7398E-04 | 1.5538E-04 | 1.6308E-01  | -1.1133E-01 |
| CCNA_01676 | 6.1320E-05 | 4.2488E-05 | 5.2915E-01  | 1.2216E-01  |
| CCNA_01677 | 3.1903E-04 | 1.4463E-04 | 1.1413E+00  | 5.1263E-01  |
| CCNA_01678 | 5.1097E-05 | 2.1604E-05 | 1.2415E+00  | 5.7652E-01  |
| CCNA_01679 | 6.8358E-05 | 1.2960E-04 | -9.2288E-01 | -8.0401E-01 |
| CCNA_01680 | 6.1713E-05 | 5.4139E-05 | 1.8880E-01  | -9.4929E-02 |
| CCNA_01681 | 7.1188E-05 | 6.1473E-05 | 2.1158E-01  | -8.0397E-02 |
| CCNA_01682 | 1.0447E-04 | 4.6814E-05 | 1.1579E+00  | 5.2323E-01  |
| CCNA_01683 | 8.9911E-05 | 8.9243E-05 | 1.0701E-02  | -2.0853E-01 |
| CCNA_01684 | 1.2391E-03 | 3.0370E-04 | 2.0286E+00  | 1.0786E+00  |
| CCNA_01685 | 4.5923E-04 | 1.4942E-04 | 1.6197E+00  | 8.1778E-01  |
| CCNA_01686 | 6.0244E-04 | 1.2973E-04 | 2.2152E+00  | 1.1976E+00  |
| CCNA_01687 | 9.0956E-05 | 3.5154E-05 | 1.3712E+00  | 6.5928E-01  |
| CCNA_01688 | 6.5219E-05 | 9.3113E-05 | -5.1373E-01 | -5.4303E-01 |
| CCNA_01689 | 3.7802E-04 | 3.2485E-04 | 2.1867E-01  | -7.5877E-02 |
| CCNA_01690 | 5.0010E-05 | 4.8952E-05 | 3.0746E-02  | -1.9574E-01 |
| CCNA_01691 | 4.7541E-05 | 7.6564E-05 | -6.8752E-01 | -6.5388E-01 |
| CCNA_01692 | 6.7077E-05 | 1.1734E-04 | -8.0685E-01 | -7.3000E-01 |
| CCNA_01693 | 5.1850E-05 | 4.9673E-05 | 6.1790E-02  | -1.7594E-01 |
| CCNA_01694 | 6.8862E-05 | 1.0725E-04 | -6.3922E-01 | -6.2307E-01 |
| CCNA_01695 | 6.3808E-05 | 2.4074E-05 | 1.4059E+00  | 6.8138E-01  |



|            |            |            |             |             |
|------------|------------|------------|-------------|-------------|
| CCNA_01696 | 6.4123E-05 | 1.0593E-04 | -7.2415E-01 | -6.7724E-01 |
| CCNA_01697 | 7.3274E-05 | 6.5625E-05 | 1.5896E-01  | -1.1396E-01 |
| CCNA_01698 | 1.2551E-04 | 1.5580E-04 | -3.1186E-01 | -4.1427E-01 |
| CCNA_01699 | 2.3944E-04 | 1.2828E-04 | 9.0034E-01  | 3.5892E-01  |
| CCNA_01700 | 2.3352E-04 | 1.1986E-04 | 9.6217E-01  | 3.9836E-01  |
| CCNA_01701 | 5.4722E-05 | 4.7767E-05 | 1.9599E-01  | -9.0342E-02 |
| CCNA_01702 | 5.8990E-05 | 4.1502E-05 | 5.0713E-01  | 1.0812E-01  |
| CCNA_01703 | 5.6220E-05 | 5.3195E-05 | 7.9700E-02  | -1.6452E-01 |
| CCNA_01704 | 9.0577E-05 | 1.4752E-04 | -7.0368E-01 | -6.6419E-01 |
| CCNA_01705 | 3.5754E-04 | 1.4593E-04 | 1.2927E+00  | 6.0920E-01  |
| CCNA_01706 | 3.6734E-04 | 1.6166E-04 | 1.1841E+00  | 5.3991E-01  |
| CCNA_01707 | 5.3200E-05 | 5.5283E-05 | -5.5484E-02 | -2.5074E-01 |
| CCNA_01708 | 5.2761E-05 | 1.1099E-04 | -1.0728E+00 | -8.9965E-01 |
| CCNA_01709 | 6.1811E-05 | 1.0193E-06 | 5.9106E+00  | 3.5547E+00  |
| CCNA_01710 | 4.4549E-05 | 5.7976E-05 | -3.8013E-01 | -4.5782E-01 |
| CCNA_01711 | 7.7348E-05 | 5.5656E-05 | 4.7470E-01  | 8.7430E-02  |
| CCNA_01712 | 3.0716E-04 | 1.1452E-04 | 1.4233E+00  | 6.9250E-01  |
| CCNA_01713 | 2.8463E-04 | 8.3351E-05 | 1.7717E+00  | 9.1472E-01  |
| CCNA_01714 | 2.0773E-04 | 6.3421E-05 | 1.7115E+00  | 8.7633E-01  |
| CCNA_01715 | 3.3900E-04 | 1.8678E-04 | 8.5990E-01  | 3.3313E-01  |
| CCNA_01716 | 5.4874E-05 | 1.2921E-04 | -1.2355E+00 | -1.0034E+00 |
| CCNA_01717 | 5.5531E-05 | 4.3946E-05 | 3.3740E-01  | -1.4125E-04 |
| CCNA_01718 | 5.7445E-05 | 7.9332E-05 | -4.6574E-01 | -5.1242E-01 |
| CCNA_01719 | 9.2159E-05 | 3.8659E-05 | 1.2531E+00  | 5.8391E-01  |
| CCNA_04016 | 6.6407E-05 | 9.6204E-05 | -5.3479E-01 | -5.5646E-01 |
| CCNA_01721 | 7.4527E-05 | 8.1263E-05 | -1.2489E-01 | -2.9501E-01 |
| CCNA_01722 | 5.4361E-05 | 7.3647E-05 | -4.3809E-01 | -4.9478E-01 |
| CCNA_01723 | 6.2190E-05 | 5.6625E-05 | 1.3512E-01  | -1.2916E-01 |
| CCNA_01724 | 2.1447E-04 | 1.6272E-04 | 3.9838E-01  | 3.8755E-02  |
| CCNA_01725 | 1.1335E-04 | 3.1565E-05 | 1.8441E+00  | 9.6087E-01  |
| CCNA_01726 | 1.0005E-04 | 6.5277E-05 | 6.1592E-01  | 1.7751E-01  |
| CCNA_01727 | 3.9488E-04 | 1.1592E-04 | 1.7682E+00  | 9.1249E-01  |
| CCNA_01728 | 8.7498E-05 | 1.3203E-04 | -5.9356E-01 | -5.9395E-01 |
| CCNA_01729 | 1.3065E-04 | 7.1385E-05 | 8.7195E-01  | 3.4082E-01  |
| CCNA_01730 | 2.1696E-04 | 5.2283E-05 | 2.0528E+00  | 1.0940E+00  |
| CCNA_01731 | 7.6612E-05 | 1.4650E-04 | -9.3523E-01 | -8.1188E-01 |
| CCNA_01732 | 1.8044E-04 | 1.4687E-04 | 2.9694E-01  | -2.5950E-02 |
| CCNA_01733 | 9.5081E-05 | 6.3031E-05 | 5.9297E-01  | 1.6287E-01  |
| CCNA_01734 | 8.2360E-05 | 8.9011E-05 | -1.1209E-01 | -2.8685E-01 |
| CCNA_01735 | 7.0472E-05 | 1.4433E-04 | -1.0342E+00 | -8.7502E-01 |
| CCNA_01736 | 6.8224E-05 | 1.3329E-04 | -9.6619E-01 | -8.3163E-01 |
| CCNA_01737 | 1.5963E-04 | 1.7820E-04 | -1.5884E-01 | -3.1666E-01 |
| CCNA_01738 | 5.8736E-05 | 1.3331E-04 | -1.1824E+00 | -9.6954E-01 |
| CCNA_01739 | 8.1967E-05 | 1.5509E-04 | -9.2000E-01 | -8.0217E-01 |
| CCNA_01740 | 5.8638E-05 | 4.0192E-05 | 5.4475E-01  | 1.3211E-01  |
| CCNA_01741 | 2.9468E-04 | 6.5614E-04 | -1.1549E+00 | -9.5198E-01 |
| CCNA_01742 | 3.0681E-04 | 6.7704E-04 | -1.1419E+00 | -9.4369E-01 |
| CCNA_01743 | 6.0238E-05 | 1.4332E-04 | -1.2505E+00 | -1.0130E+00 |
| CCNA_01744 | 5.9258E-05 | 3.3720E-05 | 8.1317E-01  | 3.0332E-01  |
| CCNA_01745 | 1.4925E-04 | 5.6700E-05 | 1.3962E+00  | 6.7518E-01  |
| CCNA_01746 | 1.5130E-04 | 6.7399E-05 | 1.1665E+00  | 5.2866E-01  |
| CCNA_01747 | 7.2677E-05 | 1.2455E-05 | 2.5439E+00  | 1.4072E+00  |
| CCNA_01748 | 1.0470E-04 | 4.0789E-05 | 1.3598E+00  | 6.5201E-01  |

|            |            |            |             |             |
|------------|------------|------------|-------------|-------------|
| CCNA_01749 | 3.0953E-04 | 1.7082E-04 | 8.5756E-01  | 3.3164E-01  |
| CCNA_01750 | 1.2658E-04 | 1.2099E-04 | 6.5059E-02  | -1.7385E-01 |
| CCNA_01751 | 7.0227E-05 | 3.3173E-05 | 1.0817E+00  | 4.7463E-01  |
| CCNA_01752 | 6.2976E-05 | 1.5984E-04 | -1.3437E+00 | -1.0724E+00 |
| CCNA_01753 | 5.5984E-05 | 1.1875E-04 | -1.0848E+00 | -9.0726E-01 |
| CCNA_01754 | 4.2861E-05 | 3.2096E-05 | 4.1707E-01  | 5.0670E-02  |
| CCNA_01755 | 5.7862E-05 | 1.4772E-04 | -1.3521E+00 | -1.0778E+00 |
| CCNA_01756 | 4.6542E-05 | 1.0904E-04 | -1.2282E+00 | -9.9877E-01 |
| CCNA_01757 | 5.0990E-05 | 6.0935E-05 | -2.5711E-01 | -3.7935E-01 |
| CCNA_01758 | 4.3647E-05 | 1.2538E-05 | 1.7987E+00  | 9.3196E-01  |
| CCNA_01759 | 1.7456E-04 | 1.4242E-04 | 2.9348E-01  | -2.8158E-02 |
| CCNA_01760 | 1.4257E-04 | 6.0844E-05 | 1.2283E+00  | 5.6811E-01  |
| CCNA_01761 | 6.4789E-05 | 1.4823E-04 | -1.1940E+00 | -9.7694E-01 |
| CCNA_01762 | 3.4897E-04 | 1.6062E-04 | 1.1194E+00  | 4.9866E-01  |
| CCNA_01763 | 3.3447E-04 | 1.6243E-04 | 1.0420E+00  | 4.4931E-01  |
| CCNA_01764 | 4.1256E-05 | 1.1382E-04 | -1.4640E+00 | -1.1492E+00 |
| CCNA_01765 | 4.2223E-05 | 3.4209E-05 | 3.0346E-01  | -2.1793E-02 |
| CCNA_01766 | 4.6946E-04 | 1.0182E-04 | 2.2048E+00  | 1.1910E+00  |
| CCNA_01767 | 2.6767E-04 | 1.4776E-04 | 8.5715E-01  | 3.3137E-01  |
| CCNA_01768 | 6.7161E-05 | 4.7468E-05 | 5.0050E-01  | 1.0389E-01  |
| CCNA_01769 | 1.2564E-04 | 1.6637E-04 | -4.0510E-01 | -4.7374E-01 |
| CCNA_01770 | 1.3017E-04 | 1.6243E-04 | -3.1937E-01 | -4.1906E-01 |
| CCNA_01771 | 4.0891E-05 | 8.0550E-06 | 2.3425E+00  | 1.2788E+00  |
| CCNA_01772 | 3.7552E-05 | 2.9900E-05 | 3.2856E-01  | -5.7846E-03 |
| CCNA_01773 | 6.6675E-05 | 5.6460E-05 | 2.3982E-01  | -6.2386E-02 |
| CCNA_01774 | 3.5546E-05 | 1.1486E-05 | 1.6290E+00  | 8.2367E-01  |
| CCNA_01775 | 3.9068E-04 | 1.6276E-04 | 1.2632E+00  | 5.9038E-01  |
| CCNA_01776 | 3.4639E-04 | 1.6243E-04 | 1.0926E+00  | 4.8154E-01  |
| CCNA_01777 | 1.0135E-04 | 1.1572E-04 | -1.9131E-01 | -3.3738E-01 |
| CCNA_01778 | 2.2333E-04 | 6.8965E-05 | 1.6951E+00  | 8.6584E-01  |
| CCNA_01779 | 1.1213E-04 | 7.7840E-05 | 5.2649E-01  | 1.2047E-01  |
| CCNA_01780 | 7.3389E-05 | 1.3309E-04 | -8.5876E-01 | -7.6310E-01 |
| CCNA_01781 | 4.7397E-05 | 6.2899E-06 | 2.9119E+00  | 1.6420E+00  |
| CCNA_01782 | 5.9425E-05 | 7.4103E-05 | -3.1852E-01 | -4.1852E-01 |
| CCNA_01783 | 4.7249E-05 | 1.0475E-04 | -1.1485E+00 | -9.4794E-01 |
| CCNA_01784 | 1.0499E-04 | 0.0000E+00 | 1.3629E+01  | 8.4779E+00  |
| CCNA_01785 | 9.3694E-05 | 9.4108E-05 | -6.4137E-03 | -2.1944E-01 |
| CCNA_01786 | 3.2840E-05 | 1.6574E-06 | 4.3015E+00  | 2.5283E+00  |
| CCNA_01787 | 3.0857E-05 | 2.8756E-05 | 1.0152E-01  | -1.5060E-01 |
| CCNA_01788 | 3.9767E-05 | 5.5391E-05 | -4.7810E-01 | -5.2031E-01 |
| CCNA_01789 | 2.1564E-04 | 4.2428E-04 | -9.7641E-01 | -8.3815E-01 |
| CCNA_01790 | 2.2357E-04 | 4.2238E-04 | -9.1781E-01 | -8.0077E-01 |
| CCNA_01791 | 6.2111E-04 | 2.6831E-04 | 1.2109E+00  | 5.5702E-01  |
| CCNA_01792 | 2.1853E-04 | 2.6320E-04 | -2.6832E-01 | -3.8649E-01 |
| CCNA_01793 | 1.6215E-04 | 1.3547E-04 | 2.5932E-01  | -4.9946E-02 |
| CCNA_01794 | 1.0933E-04 | 1.5913E-04 | -5.4148E-01 | -5.6073E-01 |
| CCNA_01795 | 1.0490E-04 | 1.6243E-04 | -6.3074E-01 | -6.1766E-01 |
| CCNA_01796 | 1.2060E-04 | 1.0755E-04 | 1.6514E-01  | -1.1002E-01 |
| CCNA_01797 | 2.4461E-04 | 6.7324E-05 | 1.8611E+00  | 9.7175E-01  |
| CCNA_01798 | 9.5063E-05 | 1.0181E-04 | -9.9042E-02 | -2.7852E-01 |
| CCNA_01799 | 2.6195E-04 | 1.2129E-04 | 1.1108E+00  | 4.9315E-01  |
| CCNA_01800 | 6.0419E-05 | 8.9641E-05 | -5.6919E-01 | -5.7840E-01 |
| CCNA_01801 | 7.6478E-05 | 6.4324E-05 | 2.4959E-01  | -5.6150E-02 |

|            |            |            |             |             |
|------------|------------|------------|-------------|-------------|
| CCNA_01802 | 1.3437E-04 | 8.1536E-05 | 7.2062E-01  | 2.4429E-01  |
| CCNA_01803 | 1.1385E-04 | 5.9708E-05 | 9.3094E-01  | 3.7844E-01  |
| CCNA_01804 | 4.6038E-05 | 1.4090E-04 | -1.6137E+00 | -1.2446E+00 |
| CCNA_01805 | 7.0772E-05 | 1.1696E-04 | -7.2471E-01 | -6.7760E-01 |
| CCNA_01806 | 7.9179E-05 | 1.3145E-04 | -7.3133E-01 | -6.8182E-01 |
| CCNA_01807 | 2.2376E-04 | 6.7490E-05 | 1.7290E+00  | 8.8750E-01  |
| CCNA_01808 | 2.1937E-04 | 1.4730E-04 | 5.7455E-01  | 1.5112E-01  |
| CCNA_01809 | 2.1313E-04 | 1.4809E-04 | 5.2525E-01  | 1.1967E-01  |
| CCNA_01810 | 7.3107E-05 | 1.2082E-04 | -7.2474E-01 | -6.7762E-01 |
| CCNA_01811 | 6.7133E-05 | 7.6780E-05 | -1.9376E-01 | -3.3894E-01 |
| CCNA_01812 | 9.0374E-05 | 4.8048E-05 | 9.1124E-01  | 3.6588E-01  |
| CCNA_01813 | 1.0155E-04 | 2.0792E-05 | 2.2876E+00  | 1.2438E+00  |
| CCNA_01814 | 4.8507E-05 | 8.6608E-05 | -8.3631E-01 | -7.4878E-01 |
| CCNA_01815 | 4.6842E-05 | 1.1849E-04 | -1.3388E+00 | -1.0693E+00 |
| CCNA_01816 | 1.3515E-04 | 1.6046E-04 | -2.4766E-01 | -3.7332E-01 |
| CCNA_01817 | 8.4316E-05 | 9.8044E-05 | -2.1766E-01 | -3.5419E-01 |
| CCNA_01818 | 5.4176E-05 | 1.0500E-04 | -9.5461E-01 | -8.2424E-01 |
| CCNA_01819 | 2.1943E-04 | 1.3781E-04 | 6.7109E-01  | 2.1270E-01  |
| CCNA_01820 | 1.5792E-04 | 1.6243E-04 | -4.0595E-02 | -2.4124E-01 |
| CCNA_01821 | 1.0261E-04 | 1.1232E-04 | -1.3053E-01 | -2.9861E-01 |
| CCNA_01822 | 4.7291E-05 | 1.0636E-04 | -1.1694E+00 | -9.6121E-01 |
| CCNA_01823 | 5.3658E-05 | 2.0883E-06 | 4.6778E+00  | 2.7683E+00  |
| CCNA_01824 | 7.9331E-05 | 1.5325E-04 | -9.4994E-01 | -8.2126E-01 |
| CCNA_01825 | 6.9870E-05 | 1.2547E-04 | -8.4454E-01 | -7.5404E-01 |
| CCNA_01826 | 1.1599E-04 | 1.0623E-04 | 1.2675E-01  | -1.3451E-01 |
| CCNA_01827 | 4.6713E-05 | 1.0293E-04 | -1.1398E+00 | -9.4236E-01 |
| CCNA_01828 | 8.5801E-05 | 6.1432E-05 | 4.8188E-01  | 9.2013E-02  |
| CCNA_01829 | 8.2864E-05 | 4.3035E-05 | 9.4505E-01  | 3.8744E-01  |
| CCNA_01830 | 3.8681E-04 | 1.3087E-04 | 1.5634E+00  | 7.8186E-01  |
| CCNA_01831 | 5.0801E-05 | 1.2109E-04 | -1.2531E+00 | -1.0147E+00 |
| CCNA_01832 | 4.6218E-05 | 1.5459E-04 | -1.7419E+00 | -1.3264E+00 |
| CCNA_01833 | 6.0729E-05 | 3.1623E-05 | 9.4112E-01  | 3.8493E-01  |
| CCNA_01834 | 4.1686E-05 | 1.2449E-04 | -1.5783E+00 | -1.2221E+00 |
| CCNA_01835 | 6.8525E-05 | 1.3405E-04 | -9.6808E-01 | -8.3283E-01 |
| CCNA_01836 | 6.5427E-05 | 8.9997E-05 | -4.6003E-01 | -5.0878E-01 |
| CCNA_01837 | 1.2861E-04 | 8.0268E-05 | 6.8001E-01  | 2.1839E-01  |
| CCNA_01838 | 5.1938E-05 | 8.4080E-05 | -6.9499E-01 | -6.5865E-01 |
| CCNA_01839 | 1.0593E-04 | 1.3922E-05 | 2.9269E+00  | 1.6516E+00  |
| CCNA_01840 | 6.7619E-05 | 1.7643E-05 | 1.9377E+00  | 1.0206E+00  |
| CCNA_01841 | 6.6675E-05 | 5.1960E-06 | 3.6795E+00  | 2.1316E+00  |
| CCNA_01842 | 6.0294E-05 | 6.1954E-05 | -3.9267E-02 | -2.4040E-01 |
| CCNA_01843 | 4.4188E-05 | 1.4045E-04 | -1.6683E+00 | -1.2794E+00 |
| CCNA_01844 | 2.3126E-04 | 1.5706E-04 | 5.5809E-01  | 1.4062E-01  |
| CCNA_01845 | 6.3397E-05 | 1.0368E-04 | -7.0966E-01 | -6.6800E-01 |
| CCNA_01846 | 4.3074E-05 | 8.3301E-05 | -9.5152E-01 | -8.2227E-01 |
| CCNA_01847 | 8.8788E-05 | 7.1318E-05 | 3.1599E-01  | -1.3797E-02 |
| CCNA_01848 | 8.7414E-05 | 9.5956E-05 | -1.3455E-01 | -3.0117E-01 |
| CCNA_01849 | 5.6562E-05 | 1.0054E-04 | -8.2984E-01 | -7.4466E-01 |
| CCNA_01850 | 8.5024E-05 | 8.3020E-05 | 3.4346E-02  | -1.9344E-01 |
| CCNA_01851 | 7.6472E-04 | 1.0013E-04 | 2.9329E+00  | 1.6554E+00  |
| CCNA_01852 | 7.6022E-04 | 1.0675E-04 | 2.8321E+00  | 1.5911E+00  |
| CCNA_01853 | 4.9191E-04 | 1.6243E-04 | 1.5986E+00  | 8.0428E-01  |
| CCNA_01854 | 8.1741E-05 | 1.0797E-04 | -4.0156E-01 | -4.7148E-01 |

|            |            |            |             |             |
|------------|------------|------------|-------------|-------------|
| CCNA_01855 | 5.5993E-05 | 1.1441E-04 | -1.0309E+00 | -8.7289E-01 |
| CCNA_01856 | 5.0976E-05 | 2.9063E-05 | 8.1038E-01  | 3.0154E-01  |
| CCNA_01857 | 4.0308E-05 | 2.8259E-06 | 3.8302E+00  | 2.2277E+00  |
| CCNA_01858 | 4.5603E-05 | 9.4555E-05 | -1.0520E+00 | -8.8637E-01 |
| CCNA_01859 | 5.0611E-05 | 1.0261E-04 | -1.0196E+00 | -8.6572E-01 |
| CCNA_01860 | 6.2255E-05 | 4.8372E-05 | 3.6388E-01  | 1.6747E-02  |
| CCNA_01861 | 5.6511E-05 | 1.3783E-04 | -1.2862E+00 | -1.0358E+00 |
| CCNA_01862 | 6.9436E-05 | 1.4958E-05 | 2.2140E+00  | 1.1969E+00  |
| CCNA_01863 | 1.0531E-04 | 1.2368E-04 | -2.3206E-01 | -3.6337E-01 |
| CCNA_01864 | 9.2603E-05 | 9.1771E-05 | 1.2960E-02  | -2.0709E-01 |
| CCNA_01865 | 1.6153E-04 | 0.0000E+00 | 1.4251E+01  | 8.8743E+00  |
| CCNA_01866 | 4.2570E-05 | 1.5000E-05 | 1.5043E+00  | 7.4413E-01  |
| CCNA_01867 | 5.4292E-05 | 9.4182E-05 | -7.9473E-01 | -7.2226E-01 |
| CCNA_01868 | 5.3617E-05 | 1.3346E-04 | -1.3157E+00 | -1.0545E+00 |
| CCNA_01869 | 8.9865E-05 | 2.4115E-05 | 1.8974E+00  | 9.9488E-01  |
| CCNA_01870 | 4.6852E-05 | 8.7743E-05 | -9.0518E-01 | -7.9272E-01 |
| CCNA_01871 | 5.1337E-05 | 6.4995E-05 | -3.4039E-01 | -4.3247E-01 |
| CCNA_01872 | 4.6828E-05 | 9.1232E-05 | -9.6214E-01 | -8.2905E-01 |
| CCNA_01873 | 4.6838E-05 | 1.0839E-04 | -1.2104E+00 | -9.8740E-01 |
| CCNA_01874 | 5.2257E-05 | 5.1976E-05 | 7.6709E-03  | -2.1046E-01 |
| CCNA_01875 | 5.5758E-05 | 0.0000E+00 | 1.2716E+01  | 7.8955E+00  |
| CCNA_01876 | 9.4309E-05 | 9.1050E-05 | 5.0678E-02  | -1.8303E-01 |
| CCNA_01877 | 9.4346E-05 | 9.1464E-05 | 4.4694E-02  | -1.8684E-01 |
| CCNA_01878 | 5.7117E-05 | 5.5424E-05 | 4.3319E-02  | -1.8772E-01 |
| CCNA_01879 | 5.9836E-05 | 4.6432E-05 | 3.6574E-01  | 1.7933E-02  |
| CCNA_01880 | 4.9834E-05 | 4.6573E-06 | 3.4171E+00  | 1.9642E+00  |
| CCNA_01881 | 6.5491E-05 | 4.8098E-05 | 4.4518E-01  | 6.8604E-02  |
| CCNA_01882 | 1.1123E-04 | 1.2135E-04 | -1.2559E-01 | -2.9546E-01 |
| CCNA_01883 | 1.0293E-04 | 1.0578E-04 | -3.9355E-02 | -2.4045E-01 |
| CCNA_01884 | 5.7949E-05 | 3.3148E-06 | 4.1243E+00  | 2.4153E+00  |
| CCNA_01885 | 4.3259E-05 | 8.8240E-05 | -1.0284E+00 | -8.7133E-01 |
| CCNA_01886 | 5.8657E-05 | 7.3796E-05 | -3.3129E-01 | -4.2666E-01 |
| CCNA_01887 | 6.5015E-05 | 2.1132E-06 | 4.9377E+00  | 2.9341E+00  |
| CCNA_01888 | 5.8389E-05 | 6.3255E-05 | -1.1556E-01 | -2.8906E-01 |
| CCNA_01889 | 7.1295E-05 | 7.6721E-05 | -1.0590E-01 | -2.8290E-01 |
| CCNA_01890 | 6.9454E-05 | 8.5257E-05 | -2.9580E-01 | -4.0403E-01 |
| CCNA_01891 | 5.1457E-05 | 6.5410E-05 | -3.4618E-01 | -4.3616E-01 |
| CCNA_01892 | 5.6100E-05 | 3.7557E-05 | 5.7872E-01  | 1.5378E-01  |
| CCNA_01893 | 5.1217E-05 | 5.7305E-05 | -1.6212E-01 | -3.1876E-01 |
| CCNA_01894 | 6.0386E-05 | 9.9950E-05 | -7.2699E-01 | -6.7906E-01 |
| CCNA_01895 | 5.5924E-05 | 1.3644E-04 | -1.2867E+00 | -1.0360E+00 |
| CCNA_01896 | 1.4024E-04 | 1.5372E-04 | -1.3245E-01 | -2.9983E-01 |
| CCNA_01897 | 4.8641E-05 | 7.4666E-05 | -6.1830E-01 | -6.0973E-01 |
| CCNA_01898 | 7.4323E-05 | 7.1376E-05 | 5.8294E-02  | -1.7817E-01 |
| CCNA_01899 | 7.0208E-05 | 1.2174E-05 | 2.5270E+00  | 1.3965E+00  |
| CCNA_01900 | 8.0538E-05 | 7.9348E-05 | 2.1404E-02  | -2.0170E-01 |
| CCNA_01901 | 5.0894E-04 | 1.8285E-04 | 1.4768E+00  | 7.2663E-01  |
| CCNA_01902 | 3.0680E-04 | 7.4608E-05 | 2.0397E+00  | 1.0857E+00  |
| CCNA_01903 | 1.8393E-04 | 5.9733E-05 | 1.6224E+00  | 8.1947E-01  |
| CCNA_01904 | 1.5037E-04 | 9.2475E-05 | 7.0127E-01  | 2.3195E-01  |
| CCNA_01905 | 7.4795E-05 | 1.6140E-04 | -1.1096E+00 | -9.2310E-01 |
| CCNA_01906 | 7.9368E-05 | 1.2268E-04 | -6.2829E-01 | -6.1610E-01 |
| CCNA_01907 | 1.3306E-04 | 1.6213E-04 | -2.8504E-01 | -3.9716E-01 |

|            |            |            |             |             |
|------------|------------|------------|-------------|-------------|
| CCNA_01908 | 5.7695E-05 | 1.3380E-04 | -1.2136E+00 | -9.8941E-01 |
| CCNA_01909 | 7.4878E-05 | 6.2700E-05 | 2.5599E-01  | -5.2073E-02 |
| CCNA_01910 | 1.3937E-04 | 4.9971E-06 | 4.7993E+00  | 2.8458E+00  |
| CCNA_01911 | 2.7264E-04 | 1.0193E-04 | 1.4193E+00  | 6.8996E-01  |
| CCNA_01912 | 2.2668E-04 | 8.1893E-05 | 1.4688E+00  | 7.2148E-01  |
| CCNA_01913 | 2.2273E-04 | 5.1686E-05 | 2.1072E+00  | 1.1287E+00  |
| CCNA_01914 | 1.2506E-04 | 9.7348E-05 | 3.6132E-01  | 1.5114E-02  |
| CCNA_01915 | 6.6527E-05 | 8.5274E-05 | -3.5820E-01 | -4.4382E-01 |
| CCNA_04000 | 6.4201E-05 | 1.1060E-04 | -7.8467E-01 | -7.1585E-01 |
| CCNA_01916 | 1.3925E-04 | 9.0453E-05 | 6.2236E-01  | 1.8161E-01  |
| CCNA_01917 | 3.2135E-04 | 1.2671E-04 | 1.3426E+00  | 6.4099E-01  |
| CCNA_01918 | 3.1955E-04 | 1.2145E-04 | 1.3957E+00  | 6.7486E-01  |
| CCNA_01919 | 5.7251E-05 | 6.0272E-05 | -7.4256E-02 | -2.6272E-01 |
| CCNA_01920 | 8.6476E-05 | 4.1352E-05 | 1.0641E+00  | 4.6338E-01  |
| CCNA_01921 | 1.1593E-04 | 1.6161E-04 | -4.7930E-01 | -5.2107E-01 |
| CCNA_01922 | 3.4870E-04 | 1.5537E-04 | 1.1662E+00  | 5.2850E-01  |
| CCNA_01923 | 3.4921E-04 | 1.6271E-04 | 1.1018E+00  | 4.8740E-01  |
| CCNA_01924 | 6.4340E-05 | 1.9226E-05 | 1.7421E+00  | 8.9586E-01  |
| CCNA_01925 | 2.0480E-04 | 2.4023E-04 | -2.3022E-01 | -3.6220E-01 |
| CCNA_01926 | 2.0485E-04 | 2.4240E-04 | -2.4283E-01 | -3.7024E-01 |
| CCNA_01927 | 1.3454E-04 | 2.8590E-06 | 5.5523E+00  | 3.3261E+00  |
| CCNA_01928 | 6.0830E-05 | 1.3650E-04 | -1.1661E+00 | -9.5911E-01 |
| CCNA_01929 | 7.5193E-05 | 6.2468E-05 | 2.6738E-01  | -4.4805E-02 |
| CCNA_01930 | 5.0976E-05 | 9.5384E-05 | -9.0391E-01 | -7.9191E-01 |
| CCNA_01931 | 5.4643E-05 | 5.8241E-05 | -9.2085E-02 | -2.7409E-01 |
| CCNA_01932 | 4.7943E-05 | 5.1976E-05 | -1.1663E-01 | -2.8974E-01 |
| CCNA_01933 | 6.2222E-05 | 6.8816E-05 | -1.4537E-01 | -3.0808E-01 |
| CCNA_01934 | 7.8328E-05 | 9.3561E-05 | -2.5642E-01 | -3.7891E-01 |
| CCNA_01935 | 8.0460E-05 | 1.7303E-05 | 2.2166E+00  | 1.1985E+00  |
| CCNA_01936 | 5.7533E-05 | 9.4738E-05 | -7.1955E-01 | -6.7431E-01 |
| CCNA_01937 | 4.7656E-05 | 3.9165E-05 | 2.8295E-01  | -3.4875E-02 |
| CCNA_01938 | 5.5096E-05 | 0.0000E+00 | 1.2699E+01  | 7.8846E+00  |
| CCNA_01939 | 1.1597E-04 | 1.6077E-04 | -4.7122E-01 | -5.1591E-01 |
| CCNA_01940 | 5.7066E-05 | 1.0903E-04 | -9.3404E-01 | -8.1112E-01 |
| CCNA_01941 | 3.9633E-05 | 8.8340E-05 | -1.1563E+00 | -9.5290E-01 |
| CCNA_01942 | 1.2468E-04 | 1.6243E-04 | -3.8163E-01 | -4.5877E-01 |
| CCNA_01943 | 1.2700E-04 | 1.6243E-04 | -3.5496E-01 | -4.4176E-01 |
| CCNA_01944 | 7.8231E-05 | 1.2853E-05 | 2.6048E+00  | 1.4461E+00  |
| CCNA_01945 | 3.1333E-04 | 1.6363E-04 | 9.3724E-01  | 3.8246E-01  |
| CCNA_01946 | 3.2121E-04 | 1.6363E-04 | 9.7305E-01  | 4.0530E-01  |
| CCNA_01947 | 1.5882E-04 | 4.3350E-05 | 1.8731E+00  | 9.7937E-01  |
| CCNA_01948 | 3.3734E-04 | 1.7898E-04 | 9.1439E-01  | 3.6788E-01  |
| CCNA_01949 | 5.7986E-05 | 4.3557E-05 | 4.1266E-01  | 4.7861E-02  |
| CCNA_01950 | 6.3905E-05 | 1.6116E-04 | -1.3344E+00 | -1.0665E+00 |
| CCNA_01951 | 1.7476E-04 | 1.4798E-04 | 2.3991E-01  | -6.2329E-02 |
| CCNA_01952 | 3.8623E-04 | 1.6243E-04 | 1.2496E+00  | 5.8172E-01  |
| CCNA_01953 | 9.8979E-05 | 1.1681E-04 | -2.3905E-01 | -3.6783E-01 |
| CCNA_01954 | 1.8062E-04 | 5.2863E-05 | 1.7725E+00  | 9.1520E-01  |
| CCNA_01955 | 1.5866E-04 | 1.0621E-04 | 5.7902E-01  | 1.5397E-01  |
| CCNA_01956 | 6.1209E-05 | 6.4647E-05 | -7.8910E-02 | -2.6568E-01 |
| CCNA_01957 | 2.8564E-04 | 1.5556E-04 | 8.7669E-01  | 3.4384E-01  |
| CCNA_01958 | 3.4198E-04 | 1.2319E-04 | 1.4730E+00  | 7.2417E-01  |
| CCNA_01959 | 2.6095E-04 | 1.0004E-04 | 1.3831E+00  | 6.6685E-01  |

|            |            |            |             |             |
|------------|------------|------------|-------------|-------------|
| CCNA_01960 | 1.5446E-04 | 5.0302E-05 | 1.6183E+00  | 8.1689E-01  |
| CCNA_01961 | 4.5409E-05 | 1.3019E-04 | -1.5195E+00 | -1.1846E+00 |
| CCNA_01962 | 7.7278E-05 | 4.2148E-05 | 8.7440E-01  | 3.4238E-01  |
| CCNA_01963 | 9.7070E-05 | 1.0026E-04 | -4.6659E-02 | -2.4511E-01 |
| CCNA_01964 | 6.8424E-04 | 3.2275E-04 | 1.0841E+00  | 4.7612E-01  |
| CCNA_01965 | 6.5872E-04 | 2.5484E-04 | 1.3700E+00  | 6.5850E-01  |
| CCNA_01966 | 6.9686E-04 | 3.1152E-04 | 1.1615E+00  | 5.2552E-01  |
| CCNA_01967 | 7.6571E-05 | 7.9506E-05 | -5.4332E-02 | -2.5001E-01 |
| CCNA_01968 | 1.1578E-04 | 1.6030E-04 | -4.6941E-01 | -5.1476E-01 |
| CCNA_01969 | 9.5183E-05 | 1.5469E-04 | -7.0058E-01 | -6.6221E-01 |
| CCNA_01970 | 1.9546E-04 | 1.3525E-04 | 5.3117E-01  | 1.2345E-01  |
| CCNA_01971 | 1.8169E-04 | 1.3422E-04 | 4.3687E-01  | 6.3300E-02  |
| CCNA_01972 | 4.3541E-05 | 1.2591E-04 | -1.5318E+00 | -1.1924E+00 |
| CCNA_01973 | 1.8112E-04 | 5.6302E-05 | 1.6855E+00  | 8.5975E-01  |
| CCNA_01974 | 2.0136E-04 | 8.4346E-05 | 1.2553E+00  | 5.8531E-01  |
| CCNA_01975 | 1.8377E-04 | 1.6277E-04 | 1.7497E-01  | -1.0375E-01 |
| CCNA_01976 | 3.9259E-05 | 7.3954E-05 | -9.1360E-01 | -7.9808E-01 |
| CCNA_01977 | 1.1902E-04 | 8.9310E-05 | 4.1430E-01  | 4.8906E-02  |
| CCNA_01978 | 2.1867E-04 | 1.2881E-04 | 7.6353E-01  | 2.7166E-01  |
| CCNA_01979 | 1.1335E-04 | 2.8358E-05 | 1.9985E+00  | 1.0594E+00  |
| CCNA_01980 | 5.0949E-05 | 4.4874E-05 | 1.8301E-01  | -9.8618E-02 |
| CCNA_01981 | 5.8158E-05 | 7.1965E-05 | -3.0737E-01 | -4.1141E-01 |
| CCNA_01982 | 5.6793E-05 | 9.0072E-05 | -6.6537E-01 | -6.3975E-01 |
| CCNA_01983 | 1.5259E-04 | 1.2133E-04 | 3.3063E-01  | -4.4619E-03 |
| CCNA_01984 | 4.4452E-05 | 4.1261E-05 | 1.0731E-01  | -1.4690E-01 |
| CCNA_01985 | 1.0678E-04 | 2.8433E-05 | 1.9087E+00  | 1.0021E+00  |
| CCNA_01986 | 4.1099E-05 | 1.4018E-04 | -1.7701E+00 | -1.3444E+00 |
| CCNA_01987 | 6.6647E-05 | 1.3471E-04 | -1.0152E+00 | -8.6288E-01 |
| CCNA_01988 | 6.5413E-05 | 9.6610E-05 | -5.6263E-01 | -5.7422E-01 |
| CCNA_01989 | 9.8961E-05 | 1.1098E-04 | -1.6541E-01 | -3.2086E-01 |
| CCNA_01990 | 1.4155E-04 | 1.1911E-04 | 2.4896E-01  | -5.6557E-02 |
| CCNA_01991 | 6.3230E-05 | 1.3387E-04 | -1.0821E+00 | -9.0557E-01 |
| CCNA_01992 | 9.7620E-05 | 1.3781E-04 | -4.9749E-01 | -5.3267E-01 |
| CCNA_01993 | 1.6353E-04 | 1.3191E-04 | 3.0993E-01  | -1.7663E-02 |
| CCNA_01994 | 8.9477E-05 | 6.8700E-05 | 3.8111E-01  | 2.7737E-02  |
| CCNA_01995 | 5.6030E-05 | 1.8173E-05 | 1.6238E+00  | 8.2040E-01  |
| CCNA_01996 | 1.6999E-04 | 7.8072E-05 | 1.1225E+00  | 5.0061E-01  |
| CCNA_01997 | 6.6698E-05 | 1.3351E-04 | -1.0012E+00 | -8.5399E-01 |
| CCNA_01998 | 3.5029E-04 | 9.7911E-05 | 1.8389E+00  | 9.5758E-01  |
| CCNA_01999 | 5.6941E-05 | 4.8214E-05 | 2.3989E-01  | -6.2337E-02 |
| CCNA_02000 | 3.8621E-04 | 6.4995E-04 | -7.5095E-01 | -6.9434E-01 |
| CCNA_02001 | 4.0594E-04 | 6.3935E-04 | -6.5534E-01 | -6.3336E-01 |
| CCNA_02002 | 6.6231E-05 | 9.5599E-05 | -5.2951E-01 | -5.5310E-01 |
| CCNA_02003 | 6.0715E-04 | 9.6478E-05 | 2.6537E+00  | 1.4773E+00  |
| CCNA_02004 | 3.9447E-04 | 1.4589E-04 | 1.4349E+00  | 6.9990E-01  |
| CCNA_02005 | 5.0134E-04 | 1.1941E-04 | 2.0698E+00  | 1.1049E+00  |
| CCNA_02006 | 6.9325E-05 | 1.0784E-04 | -6.3746E-01 | -6.2195E-01 |
| CCNA_02007 | 7.0411E-05 | 1.3754E-04 | -9.6596E-01 | -8.3148E-01 |
| CCNA_02008 | 9.1447E-05 | 1.5550E-04 | -7.6590E-01 | -7.0387E-01 |
| CCNA_02009 | 7.0883E-05 | 4.8894E-06 | 3.8554E+00  | 2.2438E+00  |
| CCNA_02010 | 1.4812E-04 | 1.0791E-04 | 4.5697E-01  | 7.6125E-02  |
| CCNA_02011 | 3.2524E-04 | 6.8658E-05 | 2.2439E+00  | 1.2159E+00  |
| CCNA_02012 | 1.0822E-04 | 1.0308E-04 | 7.0151E-02  | -1.7061E-01 |

|            |            |            |             |             |
|------------|------------|------------|-------------|-------------|
| CCNA_02013 | 9.0240E-05 | 1.2739E-04 | -4.9742E-01 | -5.3263E-01 |
| CCNA_02014 | 1.2263E-04 | 3.1383E-05 | 1.9659E+00  | 1.0386E+00  |
| CCNA_02015 | 5.5642E-05 | 6.1390E-05 | -1.4191E-01 | -3.0587E-01 |
| CCNA_02016 | 5.9452E-05 | 1.1892E-04 | -1.0002E+00 | -8.5330E-01 |
| CCNA_02017 | 7.1443E-05 | 4.7899E-05 | 5.7663E-01  | 1.5245E-01  |
| CCNA_02018 | 5.6655E-05 | 1.2697E-04 | -1.1642E+00 | -9.5795E-01 |
| CCNA_02019 | 1.0583E-04 | 9.6354E-05 | 1.3531E-01  | -1.2905E-01 |
| CCNA_02020 | 5.5832E-05 | 1.2464E-05 | 2.1625E+00  | 1.1640E+00  |
| CCNA_02021 | 5.2109E-05 | 1.1606E-04 | -1.1552E+00 | -9.5221E-01 |
| CCNA_02022 | 5.1772E-05 | 1.2034E-04 | -1.2168E+00 | -9.9148E-01 |
| CCNA_02023 | 7.4286E-05 | 7.2114E-05 | 4.2746E-02  | -1.8809E-01 |
| CCNA_02024 | 8.9329E-05 | 4.4410E-05 | 1.0080E+00  | 4.2762E-01  |
| CCNA_02025 | 6.6814E-05 | 6.5700E-05 | 2.4179E-02  | -1.9993E-01 |
| CCNA_02026 | 5.9794E-05 | 1.3147E-04 | -1.1366E+00 | -9.4031E-01 |
| CCNA_02027 | 6.7850E-05 | 1.1038E-04 | -7.0201E-01 | -6.6312E-01 |
| CCNA_02028 | 7.6478E-05 | 8.6492E-05 | -1.7757E-01 | -3.2861E-01 |
| CCNA_02029 | 1.0801E-04 | 4.1593E-05 | 1.3765E+00  | 6.6266E-01  |
| CCNA_02030 | 2.3360E-04 | 1.2163E-04 | 9.4146E-01  | 3.8515E-01  |
| CCNA_02031 | 1.3211E-04 | 1.5972E-04 | -2.7383E-01 | -3.9001E-01 |
| CCNA_02032 | 1.7583E-04 | 1.4198E-04 | 3.0844E-01  | -1.8613E-02 |
| CCNA_02033 | 5.4246E-04 | 4.6108E-04 | 2.3448E-01  | -6.5793E-02 |
| CCNA_02034 | 3.5969E-04 | 2.0195E-04 | 8.3274E-01  | 3.1581E-01  |
| CCNA_02035 | 1.4968E-04 | 8.3003E-05 | 8.5057E-01  | 3.2718E-01  |
| CCNA_02036 | 7.6409E-05 | 1.3506E-04 | -8.2181E-01 | -7.3954E-01 |
| CCNA_02037 | 3.0612E-04 | 6.7448E-05 | 2.1821E+00  | 1.1765E+00  |
| CCNA_02038 | 2.6458E-04 | 1.3788E-04 | 9.4025E-01  | 3.8438E-01  |
| CCNA_02039 | 4.3715E-04 | 9.7406E-05 | 2.1659E+00  | 1.1662E+00  |
| CCNA_02040 | 4.0252E-04 | 1.2789E-04 | 1.6540E+00  | 8.3965E-01  |
| CCNA_02041 | 4.9976E-04 | 1.6242E-04 | 1.6215E+00  | 8.1889E-01  |
| CCNA_02042 | 1.7002E-04 | 1.6649E-04 | 3.0222E-02  | -1.9607E-01 |
| CCNA_02043 | 6.8340E-05 | 1.1188E-04 | -7.1121E-01 | -6.6899E-01 |
| CCNA_02044 | 8.1223E-05 | 1.8488E-05 | 2.1347E+00  | 1.1462E+00  |
| CCNA_02045 | 1.1861E-04 | 3.0786E-05 | 1.9455E+00  | 1.0256E+00  |
| CCNA_02046 | 1.1742E-04 | 3.8891E-05 | 1.5939E+00  | 8.0128E-01  |
| CCNA_02047 | 1.2238E-04 | 1.2606E-04 | -4.2790E-02 | -2.4264E-01 |
| CCNA_02048 | 1.0952E-04 | 1.3265E-04 | -2.7650E-01 | -3.9171E-01 |
| CCNA_02049 | 1.2098E-04 | 8.6799E-05 | 4.7895E-01  | 9.0145E-02  |
| CCNA_02050 | 1.1609E-04 | 7.0805E-05 | 7.1326E-01  | 2.3959E-01  |
| CCNA_02051 | 5.2488E-05 | 4.6789E-05 | 1.6571E-01  | -1.0965E-01 |
| CCNA_02052 | 2.0796E-04 | 7.0390E-05 | 1.5627E+00  | 7.8142E-01  |
| CCNA_02053 | 2.8947E-05 | 9.4174E-05 | -1.7018E+00 | -1.3008E+00 |
| CCNA_02054 | 1.0863E-04 | 1.6243E-04 | -5.8038E-01 | -5.8554E-01 |
| CCNA_02055 | 4.6371E-05 | 4.3565E-05 | 8.9912E-02  | -1.5800E-01 |
| CCNA_02056 | 5.0981E-05 | 6.7954E-06 | 2.9057E+00  | 1.6380E+00  |
| CCNA_02057 | 4.8724E-05 | 6.1490E-05 | -3.3576E-01 | -4.2952E-01 |
| CCNA_02058 | 3.7465E-05 | 1.2831E-04 | -1.7759E+00 | -1.3481E+00 |
| CCNA_02059 | 5.9055E-05 | 1.5963E-04 | -1.4346E+00 | -1.1304E+00 |
| CCNA_02060 | 7.3861E-05 | 8.7594E-06 | 3.0746E+00  | 1.7458E+00  |
| CCNA_02061 | 7.6367E-05 | 2.7646E-05 | 1.4656E+00  | 7.1944E-01  |
| CCNA_02062 | 1.6894E-04 | 1.0985E-04 | 6.2088E-01  | 1.8067E-01  |
| CCNA_02063 | 1.2816E-04 | 1.6275E-04 | -3.4470E-01 | -4.3522E-01 |
| CCNA_02064 | 1.7648E-04 | 6.5940E-05 | 1.4202E+00  | 6.9049E-01  |
| CCNA_02065 | 1.5574E-04 | 8.5249E-05 | 8.6925E-01  | 3.3909E-01  |

|            |            |            |             |             |
|------------|------------|------------|-------------|-------------|
| CCNA_02066 | 1.1971E-04 | 3.4731E-05 | 1.7849E+00  | 9.2316E-01  |
| CCNA_02067 | 8.4066E-05 | 2.8002E-05 | 1.5857E+00  | 7.9605E-01  |
| CCNA_02068 | 7.0846E-05 | 1.2208E-04 | -7.8513E-01 | -7.1614E-01 |
| CCNA_02069 | 7.9757E-05 | 9.6610E-05 | -2.7661E-01 | -3.9179E-01 |
| CCNA_02070 | 8.7974E-05 | 5.9658E-05 | 5.6022E-01  | 1.4198E-01  |
| CCNA_02071 | 1.0777E-04 | 1.6151E-04 | -5.8371E-01 | -5.8767E-01 |
| CCNA_02072 | 1.1586E-04 | 1.3806E-04 | -2.5294E-01 | -3.7669E-01 |
| CCNA_02073 | 3.5569E-05 | 1.0962E-04 | -1.6238E+00 | -1.2511E+00 |
| CCNA_02074 | 5.3131E-05 | 6.1216E-05 | -2.0443E-01 | -3.4575E-01 |
| CCNA_02075 | 2.0266E-04 | 1.5517E-04 | 3.8521E-01  | 3.0350E-02  |
| CCNA_02076 | 6.9598E-05 | 1.0989E-04 | -6.5891E-01 | -6.3563E-01 |
| CCNA_02077 | 9.5331E-05 | 1.4076E-04 | -5.6219E-01 | -5.7394E-01 |
| CCNA_02078 | 2.2962E-04 | 1.6271E-04 | 4.9692E-01  | 1.0160E-01  |
| CCNA_02079 | 5.7404E-05 | 2.7223E-05 | 1.0760E+00  | 4.7097E-01  |
| CCNA_02080 | 6.9954E-05 | 1.3923E-04 | -9.9300E-01 | -8.4873E-01 |
| CCNA_02081 | 1.5048E-04 | 1.6267E-04 | -1.1239E-01 | -2.8704E-01 |
| CCNA_02082 | 2.6628E-04 | 2.1755E-04 | 2.9153E-01  | -2.9401E-02 |
| CCNA_02083 | 5.2419E-05 | 1.2728E-04 | -1.2798E+00 | -1.0317E+00 |
| CCNA_02084 | 6.7249E-05 | 9.9851E-05 | -5.7029E-01 | -5.7911E-01 |
| CCNA_02085 | 7.0925E-05 | 1.3516E-05 | 2.3908E+00  | 1.3096E+00  |
| CCNA_02086 | 4.8353E-04 | 7.6249E-05 | 2.6647E+00  | 1.4843E+00  |
| CCNA_02087 | 2.2084E-04 | 1.4015E-04 | 6.5599E-01  | 2.0307E-01  |
| CCNA_02088 | 2.1030E-04 | 1.6129E-04 | 3.8271E-01  | 2.8759E-02  |
| CCNA_02089 | 3.9916E-04 | 1.1354E-04 | 1.8137E+00  | 9.4148E-01  |
| CCNA_02090 | 3.2154E-04 | 1.6243E-04 | 9.8517E-01  | 4.1303E-01  |
| CCNA_02091 | 3.4232E-04 | 6.8120E-05 | 2.3290E+00  | 1.2702E+00  |
| CCNA_02092 | 1.2141E-04 | 6.9885E-05 | 7.9673E-01  | 2.9284E-01  |
| CCNA_02093 | 1.0963E-04 | 1.0386E-04 | 7.7969E-02  | -1.6562E-01 |
| CCNA_02094 | 2.6011E-04 | 1.6243E-04 | 6.7927E-01  | 2.1792E-01  |
| CCNA_02095 | 2.9980E-04 | 1.5902E-04 | 9.1472E-01  | 3.6809E-01  |
| CCNA_02096 | 4.8304E-04 | 1.4531E-04 | 1.7330E+00  | 8.9002E-01  |
| CCNA_02097 | 4.1026E-04 | 1.0500E-04 | 1.9661E+00  | 1.0387E+00  |
| CCNA_02098 | 1.0167E-04 | 1.7506E-04 | -7.8398E-01 | -7.1541E-01 |
| CCNA_02099 | 2.2864E-04 | 8.9011E-05 | 1.3609E+00  | 6.5269E-01  |
| CCNA_02100 | 1.3235E-04 | 2.8565E-05 | 2.2117E+00  | 1.1953E+00  |
| CCNA_02101 | 1.6610E-04 | 3.1971E-05 | 2.3769E+00  | 1.3007E+00  |
| CCNA_02102 | 9.0938E-05 | 1.5448E-04 | -7.6446E-01 | -7.0296E-01 |
| CCNA_02103 | 6.9316E-05 | 1.0360E-04 | -5.7986E-01 | -5.8521E-01 |
| CCNA_02104 | 6.2416E-05 | 3.6098E-05 | 7.8977E-01  | 2.8839E-01  |
| CCNA_02105 | 1.3288E-04 | 9.6925E-05 | 4.5514E-01  | 7.4957E-02  |
| CCNA_02106 | 1.0155E-04 | 6.8401E-05 | 5.6992E-01  | 1.4817E-01  |
| CCNA_02107 | 1.6182E-04 | 5.3451E-05 | 1.5979E+00  | 8.0384E-01  |
| CCNA_02108 | 6.8576E-05 | 8.7014E-07 | 6.2867E+00  | 3.7946E+00  |
| CCNA_02109 | 2.4834E-04 | 1.5695E-04 | 6.6197E-01  | 2.0688E-01  |
| CCNA_02110 | 1.4416E-04 | 1.0039E-04 | 5.2201E-01  | 1.1761E-01  |
| CCNA_02111 | 2.5052E-04 | 1.5978E-04 | 6.4877E-01  | 1.9846E-01  |
| CCNA_02112 | 2.4749E-04 | 1.6194E-04 | 6.1187E-01  | 1.7493E-01  |
| CCNA_02113 | 6.0923E-05 | 6.0620E-05 | 7.1058E-03  | -2.1082E-01 |
| CCNA_02114 | 9.8457E-05 | 2.8425E-05 | 1.7920E+00  | 9.2766E-01  |
| CCNA_02115 | 7.0781E-05 | 1.3331E-04 | -9.1338E-01 | -7.9794E-01 |
| CCNA_02116 | 6.2805E-05 | 9.3486E-05 | -5.7390E-01 | -5.8141E-01 |
| CCNA_02117 | 5.4255E-05 | 1.0514E-04 | -9.5445E-01 | -8.2414E-01 |
| CCNA_02118 | 4.2070E-05 | 1.0988E-04 | -1.3850E+00 | -1.0988E+00 |



|            |            |            |             |             |
|------------|------------|------------|-------------|-------------|
| CCNA_02119 | 9.1618E-05 | 1.6103E-04 | -8.1367E-01 | -7.3434E-01 |
| CCNA_02120 | 8.9111E-05 | 6.9901E-05 | 3.5020E-01  | 8.0179E-03  |
| CCNA_02121 | 9.3546E-05 | 1.0120E-04 | -1.1353E-01 | -2.8777E-01 |
| CCNA_02122 | 4.9173E-05 | 6.3810E-06 | 2.9443E+00  | 1.6626E+00  |
| CCNA_02123 | 0.0000E+00 | 0.0000E+00 | -8.4168E-01 | -7.5221E-01 |
| CCNA_02124 | 9.1188E-05 | 9.4456E-05 | -5.0854E-02 | -2.4779E-01 |
| CCNA_02125 | 1.2799E-03 | 2.1170E-04 | 2.5959E+00  | 1.4404E+00  |
| CCNA_02126 | 1.2684E-03 | 2.1003E-04 | 2.5944E+00  | 1.4394E+00  |
| CCNA_02127 | 2.7697E-04 | 6.0786E-05 | 2.1877E+00  | 1.1801E+00  |
| CCNA_02128 | 2.8275E-04 | 6.1241E-05 | 2.2068E+00  | 1.1922E+00  |
| CCNA_02129 | 4.8285E-05 | 1.1362E-04 | -1.2345E+00 | -1.0028E+00 |
| CCNA_02130 | 2.0963E-04 | 1.0441E-04 | 1.0055E+00  | 4.2599E-01  |
| CCNA_02131 | 6.3743E-05 | 4.5803E-05 | 4.7669E-01  | 8.8704E-02  |
| CCNA_02132 | 2.6138E-04 | 2.3983E-05 | 3.4456E+00  | 1.9824E+00  |
| CCNA_02133 | 4.5670E-04 | 9.0809E-05 | 2.3302E+00  | 1.2710E+00  |
| CCNA_02134 | 6.1237E-05 | 1.3031E-04 | -1.0894E+00 | -9.1022E-01 |
| CCNA_02135 | 5.4019E-05 | 7.3556E-05 | -4.4541E-01 | -4.9945E-01 |
| CCNA_02136 | 6.1751E-04 | 2.4288E-04 | 1.3462E+00  | 6.4332E-01  |
| CCNA_02137 | 3.4237E-05 | 3.4806E-07 | 6.5863E+00  | 3.9857E+00  |
| CCNA_02138 | 5.7649E-05 | 4.6457E-05 | 3.1125E-01  | -1.6824E-02 |
| CCNA_02139 | 5.8796E-05 | 1.5820E-04 | -1.4279E+00 | -1.1261E+00 |
| CCNA_02140 | 1.2172E-04 | 2.8300E-05 | 2.1043E+00  | 1.1268E+00  |
| CCNA_02141 | 1.2250E-04 | 1.2000E-04 | 2.9616E-02  | -1.9646E-01 |
| CCNA_02142 | 1.2271E-04 | 1.0976E-04 | 1.6088E-01  | -1.1274E-01 |
| CCNA_02143 | 1.0401E-04 | 8.6218E-05 | 2.7058E-01  | -4.2762E-02 |
| CCNA_02144 | 5.2308E-05 | 3.3471E-05 | 6.4387E-01  | 1.9534E-01  |
| CCNA_02145 | 4.7906E-05 | 9.4406E-05 | -9.7866E-01 | -8.3958E-01 |
| CCNA_02146 | 4.6024E-05 | 1.2441E-04 | -1.4346E+00 | -1.1304E+00 |
| CCNA_02147 | 8.2952E-05 | 9.4837E-05 | -1.9322E-01 | -3.3859E-01 |
| CCNA_02148 | 8.7142E-05 | 6.1250E-05 | 5.0854E-01  | 1.0902E-01  |
| CCNA_02149 | 7.0213E-05 | 7.3937E-05 | -7.4634E-02 | -2.6296E-01 |
| CCNA_02150 | 1.0440E-04 | 5.1057E-05 | 1.0318E+00  | 4.4279E-01  |
| CCNA_02151 | 1.4554E-04 | 1.6243E-04 | -1.5840E-01 | -3.1639E-01 |
| CCNA_02152 | 1.5668E-04 | 1.1742E-04 | 4.1613E-01  | 5.0072E-02  |
| CCNA_02153 | 1.1258E-04 | 3.1400E-05 | 1.8418E+00  | 9.5942E-01  |
| CCNA_02154 | 1.2526E-04 | 1.0752E-04 | 2.2018E-01  | -7.4910E-02 |
| CCNA_02155 | 8.2624E-05 | 1.1894E-04 | -5.2557E-01 | -5.5058E-01 |
| CCNA_02156 | 6.2689E-05 | 1.4363E-04 | -1.1961E+00 | -9.7825E-01 |
| CCNA_02157 | 5.4241E-05 | 1.7237E-05 | 1.6533E+00  | 8.3919E-01  |
| CCNA_02158 | 5.6040E-05 | 3.6156E-05 | 6.3199E-01  | 1.8776E-01  |
| CCNA_02159 | 7.4938E-05 | 1.7138E-05 | 2.1279E+00  | 1.1419E+00  |
| CCNA_02160 | 2.2841E-04 | 1.6299E-04 | 4.8679E-01  | 9.5144E-02  |
| CCNA_02161 | 2.0713E-04 | 1.5237E-04 | 4.4294E-01  | 6.7174E-02  |
| CCNA_02162 | 4.9445E-04 | 9.9221E-05 | 2.3170E+00  | 1.2625E+00  |
| CCNA_02163 | 5.5481E-04 | 1.0339E-04 | 2.4238E+00  | 1.3307E+00  |
| CCNA_02164 | 1.4238E-04 | 1.6165E-04 | -1.8316E-01 | -3.3218E-01 |
| CCNA_02165 | 7.0855E-05 | 6.8385E-05 | 5.1123E-02  | -1.8274E-01 |
| CCNA_02166 | 6.3864E-05 | 1.3708E-04 | -1.1020E+00 | -9.1824E-01 |
| CCNA_02167 | 9.3514E-05 | 1.2116E-04 | -3.7365E-01 | -4.5368E-01 |
| CCNA_04007 | 1.1743E-04 | 9.6569E-05 | 2.8210E-01  | -3.5419E-02 |
| CCNA_02169 | 1.2936E-04 | 1.1695E-04 | 1.4549E-01  | -1.2255E-01 |
| CCNA_02170 | 8.0622E-05 | 1.3950E-04 | -7.9107E-01 | -7.1993E-01 |
| CCNA_02171 | 2.1870E-04 | 8.7304E-05 | 1.3247E+00  | 6.2962E-01  |

|            |            |            |             |             |
|------------|------------|------------|-------------|-------------|
| CCNA_02172 | 2.1597E-04 | 4.8960E-05 | 2.1409E+00  | 1.1502E+00  |
| CCNA_02173 | 6.0641E-05 | 1.5107E-05 | 2.0044E+00  | 1.0631E+00  |
| CCNA_02174 | 5.9628E-05 | 2.6411E-05 | 1.1745E+00  | 5.3381E-01  |
| CCNA_02175 | 3.6396E-05 | 6.5070E-05 | -8.3819E-01 | -7.4999E-01 |
| CCNA_02176 | 5.6141E-05 | 1.4895E-04 | -1.4077E+00 | -1.1132E+00 |
| CCNA_02177 | 3.6110E-05 | 3.3571E-05 | 1.0501E-01  | -1.4837E-01 |
| CCNA_02178 | 4.9871E-05 | 7.2039E-05 | -5.3061E-01 | -5.5380E-01 |
| CCNA_02179 | 4.4179E-05 | 9.0395E-05 | -1.0329E+00 | -8.7416E-01 |
| CCNA_02180 | 8.1380E-05 | 3.9173E-05 | 1.0546E+00  | 4.5731E-01  |
| CCNA_02181 | 6.3702E-05 | 5.7015E-06 | 3.4799E+00  | 2.0043E+00  |
| CCNA_02182 | 1.1000E-04 | 1.0846E-04 | 2.0321E-02  | -2.0239E-01 |
| CCNA_02183 | 1.1903E-04 | 7.4327E-05 | 6.7932E-01  | 2.1795E-01  |
| CCNA_02184 | 5.4666E-05 | 2.5441E-05 | 1.1031E+00  | 4.8827E-01  |
| CCNA_02185 | 7.9142E-05 | 6.8028E-05 | 2.1821E-01  | -7.6167E-02 |
| CCNA_02186 | 1.2218E-04 | 9.6784E-05 | 3.3607E-01  | -9.8924E-04 |
| CCNA_02187 | 3.1797E-04 | 7.3746E-05 | 2.1081E+00  | 1.1293E+00  |
| CCNA_02188 | 6.2925E-05 | 8.3442E-05 | -4.0718E-01 | -4.7507E-01 |
| CCNA_02189 | 8.2106E-05 | 9.7157E-05 | -2.4288E-01 | -3.7027E-01 |
| CCNA_02190 | 9.2672E-05 | 1.1695E-04 | -3.3568E-01 | -4.2946E-01 |
| CCNA_02191 | 5.4213E-05 | 1.0806E-05 | 2.3258E+00  | 1.2681E+00  |
| CCNA_02192 | 8.8728E-05 | 7.1401E-05 | 3.1334E-01  | -1.5489E-02 |
| CCNA_02193 | 1.4223E-04 | 1.6097E-04 | -1.7859E-01 | -3.2926E-01 |
| CCNA_02194 | 1.7845E-04 | 1.6625E-04 | 1.0219E-01  | -1.5017E-01 |
| CCNA_02195 | 6.2717E-05 | 2.8483E-05 | 1.1385E+00  | 5.1081E-01  |
| CCNA_02196 | 8.5172E-05 | 1.1393E-04 | -4.1973E-01 | -4.8308E-01 |
| CCNA_02197 | 4.7314E-05 | 4.1344E-05 | 1.9444E-01  | -9.1331E-02 |
| CCNA_02198 | 1.5074E-04 | 1.6243E-04 | -1.0778E-01 | -2.8410E-01 |
| CCNA_02199 | 1.4073E-04 | 1.6243E-04 | -2.0692E-01 | -3.4734E-01 |
| CCNA_02200 | 9.1974E-04 | 1.6243E-04 | 2.5014E+00  | 1.3801E+00  |
| CCNA_02201 | 5.7728E-05 | 1.4559E-04 | -1.3345E+00 | -1.0666E+00 |
| CCNA_02202 | 7.6862E-05 | 1.0034E-04 | -3.8458E-01 | -4.6065E-01 |
| CCNA_02203 | 5.4962E-05 | 4.7684E-05 | 2.0482E-01  | -8.4711E-02 |
| CCNA_02204 | 1.0164E-04 | 1.4498E-04 | -5.1238E-01 | -5.4217E-01 |
| CCNA_02205 | 1.7467E-04 | 7.0829E-05 | 1.3021E+00  | 6.1518E-01  |
| CCNA_02206 | 1.3026E-04 | 9.7953E-06 | 3.7320E+00  | 2.1651E+00  |
| CCNA_02207 | 2.8752E-04 | 4.6184E-05 | 2.6380E+00  | 1.4673E+00  |
| CCNA_02208 | 1.9487E-04 | 1.4414E-04 | 4.3497E-01  | 6.2094E-02  |
| CCNA_02209 | 1.9108E-04 | 1.2033E-04 | 6.6716E-01  | 2.1019E-01  |
| CCNA_02210 | 1.5806E-04 | 7.2487E-05 | 1.1246E+00  | 5.0195E-01  |
| CCNA_02211 | 6.4821E-05 | 2.2102E-05 | 1.5519E+00  | 7.7450E-01  |
| CCNA_02212 | 9.7268E-05 | 1.2716E-04 | -3.8659E-01 | -4.6193E-01 |
| CCNA_02213 | 5.7510E-05 | 1.2551E-04 | -1.1259E+00 | -9.3347E-01 |
| CCNA_02214 | 5.7529E-05 | 1.0225E-04 | -8.2969E-01 | -7.4456E-01 |
| CCNA_02215 | 5.6067E-05 | 1.0806E-04 | -9.4663E-01 | -8.1915E-01 |
| CCNA_02216 | 7.1151E-05 | 3.6140E-05 | 9.7706E-01  | 4.0786E-01  |
| CCNA_02217 | 1.4353E-04 | 1.1806E-04 | 2.8179E-01  | -3.5614E-02 |
| CCNA_02218 | 1.4146E-04 | 7.1285E-05 | 9.8856E-01  | 4.1520E-01  |
| CCNA_02219 | 1.5803E-04 | 8.4470E-05 | 9.0363E-01  | 3.6102E-01  |
| CCNA_02220 | 4.1478E-05 | 5.3103E-05 | -3.5651E-01 | -4.4275E-01 |
| CCNA_02221 | 3.4981E-05 | 5.4703E-05 | -6.4505E-01 | -6.2679E-01 |
| CCNA_02222 | 6.2703E-05 | 1.2943E-04 | -1.0455E+00 | -8.8223E-01 |
| CCNA_02223 | 4.7203E-05 | 1.2020E-04 | -1.3485E+00 | -1.0755E+00 |
| CCNA_02224 | 4.8710E-05 | 1.3517E-04 | -1.4724E+00 | -1.1545E+00 |

|            |            |            |             |             |
|------------|------------|------------|-------------|-------------|
| CCNA_02225 | 2.4516E-04 | 6.4614E-05 | 1.9237E+00  | 1.0116E+00  |
| CCNA_02226 | 1.4420E-04 | 1.4434E-04 | -1.4064E-03 | -2.1625E-01 |
| CCNA_02227 | 7.4837E-05 | 7.6034E-05 | -2.2960E-02 | -2.3000E-01 |
| CCNA_02228 | 7.3986E-05 | 1.0568E-04 | -5.1435E-01 | -5.4343E-01 |
| CCNA_02229 | 4.8401E-05 | 5.5888E-05 | -2.0758E-01 | -3.4776E-01 |
| CCNA_02230 | 6.2601E-05 | 1.3326E-05 | 2.2312E+00  | 1.2078E+00  |
| CCNA_02231 | 8.8704E-05 | 1.6243E-04 | -8.7270E-01 | -7.7200E-01 |
| CCNA_02232 | 8.2910E-05 | 1.6003E-04 | -9.4872E-01 | -8.2049E-01 |
| CCNA_02233 | 5.0777E-05 | 4.9109E-05 | 4.8087E-02  | -1.8468E-01 |
| CCNA_02234 | 3.6331E-04 | 1.6275E-04 | 1.1585E+00  | 5.2358E-01  |
| CCNA_02235 | 3.5026E-04 | 1.6244E-04 | 1.1085E+00  | 4.9167E-01  |
| CCNA_02236 | 7.7773E-05 | 8.8398E-05 | -1.8479E-01 | -3.3322E-01 |
| CCNA_02237 | 6.1126E-05 | 1.5726E-04 | -1.3633E+00 | -1.0849E+00 |
| CCNA_02238 | 6.5718E-05 | 1.4040E-04 | -1.0952E+00 | -9.1389E-01 |
| CCNA_02239 | 5.9457E-05 | 1.3191E-04 | -1.1497E+00 | -9.4865E-01 |
| CCNA_02240 | 1.6707E-04 | 1.3055E-04 | 3.5579E-01  | 1.1585E-02  |
| CCNA_02241 | 9.3000E-05 | 1.0725E-04 | -2.0572E-01 | -3.4657E-01 |
| CCNA_02242 | 3.7839E-04 | 2.3587E-04 | 6.8183E-01  | 2.1955E-01  |
| CCNA_02243 | 4.0876E-04 | 2.7840E-04 | 5.5410E-01  | 1.3808E-01  |
| CCNA_02244 | 2.1127E-04 | 1.6274E-04 | 3.7645E-01  | 2.4761E-02  |
| CCNA_02245 | 8.7373E-05 | 1.4870E-04 | -7.6718E-01 | -7.0469E-01 |
| CCNA_02246 | 5.5984E-04 | 1.0866E-04 | 2.3651E+00  | 1.2932E+00  |
| CCNA_02247 | 5.6171E-04 | 1.0869E-04 | 2.3695E+00  | 1.2960E+00  |
| CCNA_02248 | 6.3956E-05 | 1.3329E-04 | -1.0594E+00 | -8.9107E-01 |
| CCNA_02249 | 9.1322E-05 | 7.2429E-05 | 3.3430E-01  | -2.1192E-03 |
| CCNA_02250 | 5.7829E-05 | 4.1593E-05 | 4.7530E-01  | 8.7813E-02  |
| CCNA_02251 | 2.5842E-04 | 8.2614E-05 | 1.6452E+00  | 8.3401E-01  |
| CCNA_02252 | 2.8488E-04 | 1.6272E-04 | 8.0796E-01  | 3.0000E-01  |
| CCNA_02253 | 2.5835E-04 | 1.6274E-04 | 6.6672E-01  | 2.0991E-01  |
| CCNA_02254 | 9.8748E-05 | 4.8670E-05 | 1.0205E+00  | 4.3560E-01  |
| CCNA_02255 | 7.5868E-05 | 2.8789E-05 | 1.3976E+00  | 6.7612E-01  |
| CCNA_02256 | 3.3904E-04 | 2.1273E-04 | 6.7239E-01  | 2.1353E-01  |
| CCNA_02257 | 8.8039E-05 | 7.3340E-05 | 2.6344E-01  | -4.7318E-02 |
| CCNA_02258 | 1.4200E-04 | 1.6243E-04 | -1.9395E-01 | -3.3906E-01 |
| CCNA_02259 | 4.8808E-05 | 1.1062E-04 | -1.1805E+00 | -9.6830E-01 |
| CCNA_02260 | 3.3341E-04 | 4.3432E-05 | 2.9402E+00  | 1.6600E+00  |
| CCNA_02261 | 9.8697E-05 | 1.0444E-04 | -8.1663E-02 | -2.6744E-01 |
| CCNA_02262 | 9.8864E-05 | 1.6238E-04 | -7.1591E-01 | -6.7199E-01 |
| CCNA_02263 | 7.2497E-05 | 1.1526E-04 | -6.6897E-01 | -6.4205E-01 |
| CCNA_02264 | 1.0398E-04 | 1.5857E-04 | -6.0888E-01 | -6.0372E-01 |
| CCNA_02265 | 9.7652E-05 | 1.1408E-04 | -2.2435E-01 | -3.5845E-01 |
| CCNA_02266 | 9.7943E-05 | 1.0193E-06 | 6.5747E+00  | 3.9783E+00  |
| CCNA_02267 | 4.3060E-05 | 9.1000E-05 | -1.0795E+00 | -9.0390E-01 |
| CCNA_02268 | 1.4655E-04 | 1.1116E-04 | 3.9868E-01  | 3.8945E-02  |
| CCNA_02269 | 2.8446E-04 | 2.3228E-04 | 2.9236E-01  | -2.8874E-02 |
| CCNA_02270 | 2.6371E-04 | 1.2710E-04 | 1.0530E+00  | 4.5627E-01  |
| CCNA_02271 | 3.0387E-04 | 4.8753E-05 | 2.6397E+00  | 1.4683E+00  |
| CCNA_02272 | 2.5125E-04 | 1.0215E-04 | 1.2983E+00  | 6.1275E-01  |
| CCNA_02273 | 1.2263E-04 | 1.1058E-04 | 1.4910E-01  | -1.2025E-01 |
| CCNA_02274 | 7.2423E-05 | 1.3113E-04 | -8.5652E-01 | -7.6168E-01 |
| CCNA_02275 | 7.6548E-05 | 1.6289E-04 | -1.0895E+00 | -9.1025E-01 |
| CCNA_02276 | 6.9366E-05 | 3.4184E-05 | 1.0207E+00  | 4.3567E-01  |
| CCNA_02277 | 7.5886E-05 | 1.6302E-04 | -1.1031E+00 | -9.1898E-01 |

|            |            |            |             |             |
|------------|------------|------------|-------------|-------------|
| CCNA_02278 | 6.5232E-05 | 1.3757E-04 | -1.0764E+00 | -9.0195E-01 |
| CCNA_02279 | 1.2671E-04 | 5.9136E-05 | 1.0992E+00  | 4.8577E-01  |
| CCNA_02280 | 5.7455E-05 | 1.4212E-05 | 2.0146E+00  | 1.0696E+00  |
| CCNA_02281 | 1.1788E-04 | 1.0011E-04 | 2.3568E-01  | -6.5024E-02 |
| CCNA_02282 | 6.5533E-05 | 8.4395E-05 | -3.6498E-01 | -4.4815E-01 |
| CCNA_02283 | 4.2943E-04 | 4.8662E-05 | 3.1413E+00  | 1.7883E+00  |
| CCNA_02284 | 6.4456E-05 | 8.7462E-05 | -4.4038E-01 | -4.9624E-01 |
| CCNA_02285 | 2.5575E-04 | 1.6243E-04 | 6.5488E-01  | 2.0236E-01  |
| CCNA_02286 | 6.3386E-04 | 2.3253E-04 | 1.4467E+00  | 7.0739E-01  |
| CCNA_02287 | 6.2665E-04 | 2.4165E-04 | 1.3747E+00  | 6.6149E-01  |
| CCNA_02288 | 6.9144E-05 | 4.6275E-05 | 5.7922E-01  | 1.5410E-01  |
| CCNA_02289 | 4.7434E-05 | 8.8688E-05 | -9.0280E-01 | -7.9120E-01 |
| CCNA_02290 | 1.1677E-04 | 1.5673E-04 | -4.2462E-01 | -4.8619E-01 |
| CCNA_02291 | 6.2772E-05 | 1.1900E-05 | 2.3982E+00  | 1.3144E+00  |
| CCNA_02292 | 6.6037E-05 | 5.7661E-05 | 1.9557E-01  | -9.0611E-02 |
| CCNA_02293 | 7.5997E-05 | 1.1135E-04 | -5.5114E-01 | -5.6689E-01 |
| CCNA_02294 | 7.1415E-05 | 1.2591E-04 | -8.1814E-01 | -7.3719E-01 |
| CCNA_02295 | 5.8319E-05 | 3.1698E-05 | 8.7932E-01  | 3.4552E-01  |
| CCNA_02296 | 5.3450E-05 | 9.4630E-05 | -8.2410E-01 | -7.4100E-01 |
| CCNA_02297 | 6.5024E-05 | 3.3985E-05 | 9.3583E-01  | 3.8156E-01  |
| CCNA_02298 | 4.1847E-04 | 1.6237E-04 | 1.3658E+00  | 6.5582E-01  |
| CCNA_02299 | 6.0948E-04 | 1.8305E-04 | 1.7353E+00  | 8.9147E-01  |
| CCNA_02300 | 6.9200E-05 | 1.5209E-04 | -1.1361E+00 | -9.3999E-01 |
| CCNA_02301 | 1.2764E-04 | 1.5008E-04 | -2.3367E-01 | -3.6440E-01 |
| CCNA_02302 | 1.2972E-04 | 8.1296E-05 | 6.7400E-01  | 2.1456E-01  |
| CCNA_02303 | 9.0226E-05 | 6.5650E-05 | 4.5864E-01  | 7.7187E-02  |
| CCNA_02304 | 1.0295E-04 | 1.3110E-05 | 2.9723E+00  | 1.6805E+00  |
| CCNA_02305 | 1.7456E-04 | 1.0757E-04 | 6.9832E-01  | 2.3007E-01  |
| CCNA_02306 | 6.0400E-05 | 9.6876E-05 | -6.8159E-01 | -6.5010E-01 |
| CCNA_02307 | 5.7140E-05 | 3.9049E-05 | 5.4905E-01  | 1.3485E-01  |
| CCNA_02308 | 1.1305E-04 | 1.5788E-04 | -4.8191E-01 | -5.2273E-01 |
| CCNA_02309 | 1.1088E-04 | 1.6082E-04 | -5.3643E-01 | -5.5751E-01 |
| CCNA_02310 | 5.5545E-05 | 2.1745E-05 | 1.3525E+00  | 6.4735E-01  |
| CCNA_04009 | 2.6596E-04 | 1.8833E-04 | 4.9788E-01  | 1.0221E-01  |
| CCNA_02312 | 6.5186E-05 | 1.3839E-04 | -1.0861E+00 | -9.0813E-01 |
| CCNA_02313 | 7.7158E-05 | 1.0555E-04 | -4.5209E-01 | -5.0372E-01 |
| CCNA_02314 | 5.8796E-05 | 1.1744E-04 | -9.9808E-01 | -8.5197E-01 |
| CCNA_02315 | 6.4733E-05 | 4.0209E-05 | 6.8680E-01  | 2.2272E-01  |
| CCNA_02316 | 9.7070E-05 | 1.5735E-04 | -6.9694E-01 | -6.5989E-01 |
| CCNA_02317 | 5.0144E-05 | 0.0000E+00 | 1.2563E+01  | 7.7979E+00  |
| CCNA_02318 | 1.4695E-04 | 8.6517E-05 | 7.6413E-01  | 2.7205E-01  |
| CCNA_02319 | 1.3481E-04 | 2.9046E-05 | 2.2142E+00  | 1.1969E+00  |
| CCNA_02320 | 1.4047E-04 | 1.2204E-04 | 2.0288E-01  | -8.5944E-02 |
| CCNA_02321 | 1.6577E-04 | 1.5580E-04 | 8.9448E-02  | -1.5830E-01 |
| CCNA_02322 | 4.7758E-05 | 1.1833E-04 | -1.3090E+00 | -1.0503E+00 |
| CCNA_02323 | 6.3332E-05 | 5.9501E-06 | 3.4100E+00  | 1.9597E+00  |
| CCNA_02324 | 1.4968E-04 | 7.8462E-05 | 9.3174E-01  | 3.7895E-01  |
| CCNA_02325 | 5.2465E-05 | 7.8967E-05 | -5.8992E-01 | -5.9163E-01 |
| CCNA_02326 | 1.0644E-04 | 1.5835E-04 | -5.7304E-01 | -5.8086E-01 |
| CCNA_02327 | 2.5419E-04 | 1.3992E-04 | 8.6125E-01  | 3.3399E-01  |
| CCNA_02328 | 2.5040E-04 | 1.3600E-04 | 8.8056E-01  | 3.4630E-01  |
| CCNA_02329 | 9.5460E-05 | 9.0743E-06 | 3.3938E+00  | 1.9494E+00  |
| CCNA_02330 | 1.2468E-04 | 8.4528E-05 | 5.6070E-01  | 1.4229E-01  |

|            |            |            |             |             |
|------------|------------|------------|-------------|-------------|
| CCNA_02331 | 1.2139E-04 | 6.0031E-05 | 1.0157E+00  | 4.3250E-01  |
| CCNA_02332 | 1.0923E-04 | 1.6243E-04 | -5.7241E-01 | -5.8046E-01 |
| CCNA_02333 | 1.2263E-04 | 8.0376E-05 | 6.0934E-01  | 1.7331E-01  |
| CCNA_02334 | 1.1503E-04 | 1.0720E-04 | 1.0169E-01  | -1.5049E-01 |
| CCNA_02335 | 1.0696E-04 | 1.1990E-04 | -1.6482E-01 | -3.2048E-01 |
| CCNA_02336 | 8.1038E-05 | 5.9915E-05 | 4.3555E-01  | 6.2461E-02  |
| CCNA_02337 | 8.5264E-05 | 1.4734E-04 | -7.8910E-01 | -7.1867E-01 |
| CCNA_02338 | 4.0678E-05 | 1.3021E-04 | -1.6784E+00 | -1.2859E+00 |
| CCNA_02339 | 1.0291E-04 | 1.2225E-04 | -2.4849E-01 | -3.7385E-01 |
| CCNA_02340 | 1.0241E-04 | 5.1098E-05 | 1.0029E+00  | 4.2431E-01  |
| CCNA_02341 | 1.0420E-04 | 6.1291E-05 | 7.6548E-01  | 2.7290E-01  |
| CCNA_02342 | 1.8368E-04 | 4.5314E-05 | 2.0189E+00  | 1.0724E+00  |
| CCNA_02343 | 1.1599E-04 | 1.6286E-04 | -4.8966E-01 | -5.2768E-01 |
| CCNA_02344 | 1.4197E-04 | 9.8624E-05 | 5.2545E-01  | 1.1980E-01  |
| CCNA_02345 | 1.2633E-04 | 1.2464E-04 | 1.9377E-02  | -2.0299E-01 |
| CCNA_02346 | 1.6644E-04 | 7.8304E-05 | 1.0877E+00  | 4.7845E-01  |
| CCNA_02347 | 2.7808E-04 | 1.1546E-04 | 1.2681E+00  | 5.9347E-01  |
| CCNA_02348 | 6.1908E-05 | 7.3291E-05 | -2.4357E-01 | -3.7071E-01 |
| CCNA_02349 | 1.2591E-04 | 1.4404E-04 | -1.9413E-01 | -3.3918E-01 |
| CCNA_02350 | 7.6090E-05 | 6.8501E-05 | 1.5150E-01  | -1.1872E-01 |
| CCNA_02351 | 1.0032E-04 | 1.5836E-04 | -6.5851E-01 | -6.3538E-01 |
| CCNA_02352 | 6.3952E-05 | 1.5613E-04 | -1.2876E+00 | -1.0367E+00 |
| CCNA_02353 | 1.9025E-04 | 1.0774E-04 | 8.2027E-01  | 3.0785E-01  |
| CCNA_02354 | 2.5585E-04 | 1.6243E-04 | 6.5545E-01  | 2.0273E-01  |
| CCNA_02355 | 5.3963E-05 | 1.1293E-04 | -1.0653E+00 | -8.9486E-01 |
| CCNA_02356 | 7.6797E-05 | 8.9019E-05 | -2.1311E-01 | -3.5128E-01 |
| CCNA_02357 | 1.7272E-04 | 1.6035E-04 | 1.0717E-01  | -1.4699E-01 |
| CCNA_02358 | 5.5494E-05 | 1.3531E-04 | -1.2858E+00 | -1.0355E+00 |
| CCNA_02359 | 4.6204E-05 | 9.9030E-06 | 2.2210E+00  | 1.2013E+00  |
| CCNA_02360 | 6.3397E-05 | 2.3461E-05 | 1.4338E+00  | 6.9916E-01  |
| CCNA_02361 | 9.6838E-05 | 8.1644E-05 | 2.4615E-01  | -5.8345E-02 |
| CCNA_02362 | 2.2491E-04 | 1.4140E-04 | 6.6951E-01  | 2.1169E-01  |
| CCNA_02363 | 2.2310E-04 | 1.4378E-04 | 6.3380E-01  | 1.8891E-01  |
| CCNA_02364 | 2.8108E-04 | 1.2020E-04 | 1.2254E+00  | 5.6628E-01  |
| CCNA_02365 | 5.1221E-05 | 7.8710E-05 | -6.1983E-01 | -6.1070E-01 |
| CCNA_02366 | 5.3409E-05 | 7.7476E-05 | -5.3670E-01 | -5.5768E-01 |
| CCNA_02367 | 5.7963E-05 | 1.0373E-04 | -8.3961E-01 | -7.5089E-01 |
| CCNA_02368 | 1.3175E-04 | 1.3046E-04 | 1.4126E-02  | -2.0634E-01 |
| CCNA_02369 | 7.8860E-05 | 5.9750E-05 | 4.0024E-01  | 3.9941E-02  |
| CCNA_02370 | 8.1949E-05 | 7.8412E-05 | 6.3574E-02  | -1.7480E-01 |
| CCNA_02371 | 9.8660E-05 | 6.6951E-05 | 5.5925E-01  | 1.4136E-01  |
| CCNA_02372 | 2.1867E-05 | 0.0000E+00 | 1.1366E+01  | 7.0343E+00  |
| CCNA_02373 | 5.1328E-07 | 3.9778E-06 | -2.9442E+00 | -2.0933E+00 |
| CCNA_02374 | 3.8177E-05 | 7.6465E-05 | -1.0021E+00 | -8.5452E-01 |
| CCNA_02375 | 7.5123E-05 | 8.2241E-05 | -1.3065E-01 | -2.9868E-01 |
| CCNA_02376 | 5.6285E-05 | 1.1176E-04 | -9.8956E-01 | -8.4654E-01 |
| CCNA_02377 | 1.0264E-04 | 2.6485E-05 | 1.9539E+00  | 1.0309E+00  |
| CCNA_02378 | 1.2186E-04 | 1.2879E-04 | -7.9775E-02 | -2.6624E-01 |
| CCNA_02379 | 7.4707E-05 | 1.2397E-04 | -7.3073E-01 | -6.8144E-01 |
| CCNA_02380 | 9.7130E-05 | 1.2302E-04 | -3.4095E-01 | -4.3283E-01 |
| CCNA_02381 | 1.0457E-04 | 1.3307E-04 | -3.4763E-01 | -4.3708E-01 |
| CCNA_02382 | 2.1799E-04 | 4.7377E-05 | 2.2018E+00  | 1.1891E+00  |
| CCNA_02383 | 7.2714E-05 | 1.2095E-04 | -7.3410E-01 | -6.8359E-01 |

|            |            |            |             |             |
|------------|------------|------------|-------------|-------------|
| CCNA_02384 | 1.3889E-04 | 2.3353E-05 | 2.5718E+00  | 1.4251E+00  |
| CCNA_02385 | 6.8779E-05 | 1.9524E-05 | 1.8162E+00  | 9.4309E-01  |
| CCNA_02386 | 1.3984E-04 | 9.6412E-05 | 5.3645E-01  | 1.2682E-01  |
| CCNA_02387 | 8.2721E-05 | 1.3727E-04 | -7.3075E-01 | -6.8146E-01 |
| CCNA_02388 | 5.0856E-05 | 1.4482E-04 | -1.5097E+00 | -1.1783E+00 |
| CCNA_02389 | 2.1129E-04 | 1.2593E-04 | 7.4657E-01  | 2.6084E-01  |
| CCNA_02390 | 1.9950E-04 | 7.2885E-05 | 1.4526E+00  | 7.1115E-01  |
| CCNA_02391 | 1.6060E-04 | 2.6576E-04 | -7.2664E-01 | -6.7883E-01 |
| CCNA_02392 | 7.7958E-05 | 1.0993E-04 | -4.9581E-01 | -5.3160E-01 |
| CCNA_04015 | 2.9407E-04 | 4.6499E-05 | 2.6607E+00  | 1.4817E+00  |
| CCNA_02394 | 1.3138E-04 | 9.9967E-05 | 3.9411E-01  | 3.6030E-02  |
| CCNA_02395 | 2.9925E-04 | 4.5769E-05 | 2.7087E+00  | 1.5124E+00  |
| CCNA_02396 | 1.2065E-04 | 3.8941E-05 | 1.6313E+00  | 8.2513E-01  |
| CCNA_02397 | 1.5012E-04 | 7.9241E-05 | 9.2167E-01  | 3.7253E-01  |
| CCNA_02398 | 1.9518E-04 | 8.5912E-05 | 1.1838E+00  | 5.3973E-01  |
| CCNA_02399 | 7.0194E-05 | 1.4948E-04 | -1.0905E+00 | -9.1094E-01 |
| CCNA_02400 | 5.3618E-04 | 1.1458E-04 | 2.2263E+00  | 1.2047E+00  |
| CCNA_02401 | 5.2026E-04 | 1.0976E-04 | 2.2448E+00  | 1.2164E+00  |
| CCNA_02402 | 1.7075E-04 | 1.5287E-04 | 1.5953E-01  | -1.1360E-01 |
| CCNA_02403 | 2.4006E-04 | 1.1411E-04 | 1.0728E+00  | 4.6895E-01  |
| CCNA_02404 | 9.5909E-05 | 8.9160E-05 | 1.0520E-01  | -1.4825E-01 |
| CCNA_02405 | 6.1667E-05 | 9.6320E-05 | -6.4335E-01 | -6.2571E-01 |
| CCNA_02406 | 1.4695E-04 | 3.9985E-05 | 1.8775E+00  | 9.8222E-01  |
| CCNA_02407 | 1.5123E-04 | 4.0573E-05 | 1.8979E+00  | 9.9521E-01  |
| CCNA_02408 | 3.7573E-04 | 5.6700E-05 | 2.7281E+00  | 1.5247E+00  |
| CCNA_02409 | 4.0175E-04 | 6.6313E-05 | 2.5988E+00  | 1.4423E+00  |
| CCNA_02410 | 1.0401E-04 | 1.1466E-04 | -1.4067E-01 | -3.0508E-01 |
| CCNA_02411 | 2.5857E-04 | 1.0948E-04 | 1.2398E+00  | 5.7543E-01  |
| CCNA_02412 | 2.6368E-04 | 1.1357E-04 | 1.2152E+00  | 5.5975E-01  |
| CCNA_02413 | 1.4367E-04 | 1.6255E-04 | -1.7814E-01 | -3.2898E-01 |
| CCNA_02414 | 1.9993E-04 | 1.3558E-04 | 5.6036E-01  | 1.4207E-01  |
| CCNA_02415 | 2.0253E-04 | 1.4147E-04 | 5.1762E-01  | 1.1481E-01  |
| CCNA_02416 | 4.5236E-04 | 1.6033E-04 | 1.4964E+00  | 7.3910E-01  |
| CCNA_02417 | 1.3991E-04 | 4.8562E-05 | 1.5264E+00  | 7.5826E-01  |
| CCNA_02418 | 1.8699E-04 | 9.8110E-05 | 9.3040E-01  | 3.7810E-01  |
| CCNA_02419 | 7.8920E-05 | 3.7797E-05 | 1.0619E+00  | 4.6196E-01  |
| CCNA_02420 | 1.4938E-04 | 1.4021E-04 | 9.1348E-02  | -1.5709E-01 |
| CCNA_02421 | 1.9083E-04 | 1.5774E-04 | 2.7472E-01  | -4.0121E-02 |
| CCNA_02422 | 5.5910E-05 | 1.0091E-04 | -8.5190E-01 | -7.5873E-01 |
| CCNA_02423 | 1.2394E-04 | 1.3693E-04 | -1.4374E-01 | -3.0704E-01 |
| CCNA_02424 | 1.1484E-04 | 9.5914E-05 | 2.5980E-01  | -4.9641E-02 |
| CCNA_02425 | 2.4835E-04 | 1.6115E-04 | 6.2394E-01  | 1.8262E-01  |
| CCNA_02426 | 7.8874E-05 | 5.5208E-05 | 5.1453E-01  | 1.1283E-01  |
| CCNA_02427 | 3.1404E-04 | 4.8852E-05 | 2.6842E+00  | 1.4968E+00  |
| CCNA_02428 | 4.5261E-04 | 1.6049E-04 | 1.4958E+00  | 7.3871E-01  |
| CCNA_02429 | 1.5126E-04 | 1.4187E-04 | 9.2373E-02  | -1.5643E-01 |
| CCNA_02430 | 1.3642E-04 | 6.4175E-05 | 1.0878E+00  | 4.7849E-01  |
| CCNA_02431 | 1.1432E-04 | 9.4439E-05 | 2.7552E-01  | -3.9613E-02 |
| CCNA_02432 | 8.3012E-05 | 6.0893E-05 | 4.4693E-01  | 6.9716E-02  |
| CCNA_02433 | 1.0454E-04 | 1.5901E-04 | -6.0506E-01 | -6.0129E-01 |
| CCNA_02434 | 7.0199E-05 | 1.5453E-04 | -1.1383E+00 | -9.4143E-01 |
| CCNA_02435 | 2.7759E-04 | 1.9009E-04 | 5.4625E-01  | 1.3307E-01  |
| CCNA_02436 | 5.8811E-04 | 5.0595E-04 | 2.1709E-01  | -7.6882E-02 |

|            |            |            |             |             |
|------------|------------|------------|-------------|-------------|
| CCNA_02437 | 7.3995E-05 | 9.9271E-05 | -4.2397E-01 | -4.8577E-01 |
| CCNA_02438 | 8.1889E-05 | 1.2300E-04 | -5.8690E-01 | -5.8970E-01 |
| CCNA_02439 | 1.1995E-04 | 1.2995E-04 | -1.1550E-01 | -2.8902E-01 |
| CCNA_02440 | 1.8608E-04 | 9.0718E-05 | 1.0364E+00  | 4.4570E-01  |
| CCNA_02441 | 1.7431E-04 | 3.4880E-05 | 2.3209E+00  | 1.2650E+00  |
| CCNA_02442 | 7.9845E-05 | 1.1954E-04 | -5.8225E-01 | -5.8674E-01 |
| CCNA_02443 | 8.3377E-05 | 2.4513E-05 | 1.7657E+00  | 9.1088E-01  |
| CCNA_02444 | 9.9100E-05 | 7.0904E-05 | 4.8291E-01  | 9.2669E-02  |
| CCNA_02445 | 9.7139E-05 | 4.8206E-05 | 1.0107E+00  | 4.2929E-01  |
| CCNA_02446 | 1.0239E-04 | 1.8886E-05 | 2.4381E+00  | 1.3397E+00  |
| CCNA_02447 | 1.5742E-04 | 8.1876E-06 | 4.2636E+00  | 2.5042E+00  |
| CCNA_02448 | 4.7999E-04 | 9.4000E-05 | 2.3522E+00  | 1.2850E+00  |
| CCNA_02449 | 5.6165E-04 | 9.9005E-05 | 2.5040E+00  | 1.3818E+00  |
| CCNA_02450 | 1.5812E-04 | 5.4786E-05 | 1.5289E+00  | 7.5988E-01  |
| CCNA_02451 | 6.7457E-05 | 9.3221E-05 | -4.6672E-01 | -5.1305E-01 |
| CCNA_02452 | 6.4289E-05 | 9.2541E-05 | -5.2555E-01 | -5.5057E-01 |
| CCNA_02453 | 6.6564E-05 | 1.4860E-04 | -1.1586E+00 | -9.5437E-01 |
| CCNA_02454 | 6.4331E-05 | 4.7609E-05 | 4.3412E-01  | 6.1551E-02  |
| CCNA_02455 | 9.5766E-05 | 1.6757E-04 | -8.0721E-01 | -7.3022E-01 |
| CCNA_02456 | 4.6149E-05 | 5.2929E-05 | -1.9786E-01 | -3.4155E-01 |
| CCNA_02457 | 1.3380E-04 | 8.8647E-05 | 5.9384E-01  | 1.6343E-01  |
| CCNA_02458 | 1.3335E-04 | 1.0202E-04 | 3.8623E-01  | 3.1000E-02  |
| CCNA_02459 | 9.8586E-05 | 1.3936E-04 | -4.9941E-01 | -5.3390E-01 |
| CCNA_02460 | 1.0299E-04 | 1.2987E-04 | -3.3460E-01 | -4.2877E-01 |
| CCNA_02461 | 1.3976E-04 | 9.3901E-05 | 5.7366E-01  | 1.5055E-01  |
| CCNA_02462 | 2.6604E-04 | 1.0538E-04 | 1.3360E+00  | 6.3679E-01  |
| CCNA_02463 | 6.0997E-05 | 1.9531E-04 | -1.6789E+00 | -1.2862E+00 |
| CCNA_02464 | 1.8246E-04 | 1.8716E-04 | -3.6754E-02 | -2.3879E-01 |
| CCNA_02465 | 9.4480E-05 | 1.1629E-04 | -2.9970E-01 | -4.0652E-01 |
| CCNA_02466 | 9.9331E-05 | 2.8019E-05 | 1.8255E+00  | 9.4903E-01  |
| CCNA_02467 | 1.8724E-04 | 9.2715E-05 | 1.0139E+00  | 4.3136E-01  |
| CCNA_02468 | 7.9872E-05 | 1.2513E-04 | -6.4763E-01 | -6.2843E-01 |
| CCNA_02469 | 1.3349E-04 | 1.3401E-04 | -5.6067E-03 | -2.1893E-01 |
| CCNA_02470 | 5.5013E-05 | 9.6967E-05 | -8.1772E-01 | -7.3692E-01 |
| CCNA_02471 | 7.3713E-05 | 2.6461E-05 | 1.4777E+00  | 7.2720E-01  |
| CCNA_02472 | 5.8070E-05 | 1.2179E-04 | -1.0686E+00 | -8.9694E-01 |
| CCNA_02473 | 5.2659E-05 | 6.3810E-05 | -2.7716E-01 | -3.9213E-01 |
| CCNA_02474 | 7.8901E-05 | 6.4274E-05 | 2.9571E-01  | -2.6738E-02 |
| CCNA_02475 | 7.3866E-05 | 3.1308E-05 | 1.2381E+00  | 5.7433E-01  |
| CCNA_02476 | 7.2233E-05 | 5.1786E-05 | 4.7997E-01  | 9.0794E-02  |
| CCNA_02477 | 7.3551E-05 | 1.8588E-05 | 1.9838E+00  | 1.0500E+00  |
| CCNA_02478 | 6.9533E-05 | 1.0273E-04 | -5.6306E-01 | -5.7449E-01 |
| CCNA_02479 | 4.8132E-05 | 1.3060E-05 | 1.8810E+00  | 9.8445E-01  |
| CCNA_02480 | 5.6447E-05 | 1.0421E-04 | -8.8453E-01 | -7.7954E-01 |
| CCNA_02481 | 9.8693E-05 | 1.2034E-04 | -2.8609E-01 | -3.9783E-01 |
| CCNA_02482 | 5.8070E-05 | 9.3851E-05 | -6.9260E-01 | -6.5712E-01 |
| CCNA_02483 | 5.0629E-05 | 1.1318E-04 | -1.1605E+00 | -9.5556E-01 |
| CCNA_02484 | 5.8870E-05 | 9.7431E-05 | -7.2686E-01 | -6.7898E-01 |
| CCNA_02485 | 6.1852E-05 | 1.1051E-04 | -8.3725E-01 | -7.4939E-01 |
| CCNA_02486 | 5.6160E-05 | 4.6863E-05 | 2.6095E-01  | -4.8908E-02 |
| CCNA_02487 | 5.6373E-05 | 7.3100E-05 | -3.7492E-01 | -4.5449E-01 |
| CCNA_02488 | 5.2322E-05 | 1.1914E-04 | -1.1872E+00 | -9.7258E-01 |
| CCNA_02489 | 6.6842E-05 | 1.2452E-04 | -8.9757E-01 | -7.8786E-01 |

|            |            |            |             |             |
|------------|------------|------------|-------------|-------------|
| CCNA_02490 | 5.6844E-05 | 1.1776E-05 | 2.2703E+00  | 1.2327E+00  |
| CCNA_02491 | 2.6718E-05 | 3.3148E-07 | 6.2974E+00  | 3.8014E+00  |
| CCNA_02492 | 4.8336E-05 | 8.4710E-05 | -8.0944E-01 | -7.3165E-01 |
| CCNA_02493 | 6.0900E-05 | 1.3483E-04 | -1.1466E+00 | -9.4671E-01 |
| CCNA_02494 | 6.2231E-05 | 2.9751E-05 | 1.0644E+00  | 4.6359E-01  |
| CCNA_02495 | 5.0648E-05 | 1.0284E-04 | -1.0218E+00 | -8.6712E-01 |
| CCNA_02496 | 5.9050E-05 | 9.0370E-05 | -6.1393E-01 | -6.0694E-01 |
| CCNA_02497 | 1.2643E-04 | 3.3372E-05 | 1.9214E+00  | 1.0102E+00  |
| CCNA_02498 | 1.3695E-04 | 3.8634E-05 | 1.8255E+00  | 9.4901E-01  |
| CCNA_02499 | 7.0236E-05 | 3.3314E-06 | 4.3945E+00  | 2.5877E+00  |
| CCNA_02500 | 5.1749E-05 | 1.1750E-04 | -1.1831E+00 | -9.6996E-01 |
| CCNA_02501 | 5.6382E-05 | 9.3387E-05 | -7.2800E-01 | -6.7970E-01 |
| CCNA_02502 | 6.7896E-05 | 7.6597E-05 | -1.7402E-01 | -3.2635E-01 |
| CCNA_02503 | 4.7702E-05 | 5.8813E-05 | -3.0214E-01 | -4.0807E-01 |
| CCNA_02504 | 9.3218E-05 | 5.5540E-05 | 7.4694E-01  | 2.6108E-01  |
| CCNA_02505 | 7.3676E-05 | 1.6306E-04 | -1.1461E+00 | -9.4637E-01 |
| CCNA_02506 | 3.7014E-04 | 1.9028E-04 | 9.5990E-01  | 3.9691E-01  |
| CCNA_02507 | 2.9706E-04 | 3.0111E-04 | -1.9562E-02 | -2.2783E-01 |
| CCNA_02508 | 8.2897E-05 | 1.6120E-04 | -9.5946E-01 | -8.2733E-01 |
| CCNA_02509 | 9.5021E-05 | 4.7468E-05 | 1.0011E+00  | 4.2319E-01  |
| CCNA_02510 | 4.8701E-05 | 8.7843E-05 | -8.5096E-01 | -7.5813E-01 |
| CCNA_02511 | 6.3577E-05 | 4.6921E-05 | 4.3811E-01  | 6.4096E-02  |
| CCNA_02512 | 3.4353E-04 | 5.0170E-05 | 2.7753E+00  | 1.5549E+00  |
| CCNA_02513 | 2.1272E-04 | 1.6274E-04 | 3.8633E-01  | 3.1064E-02  |
| CCNA_02514 | 2.3855E-04 | 1.7830E-04 | 4.2000E-01  | 5.2543E-02  |
| CCNA_02515 | 7.4499E-05 | 1.7676E-05 | 2.0748E+00  | 1.1081E+00  |
| CCNA_02516 | 5.4185E-05 | 7.3150E-05 | -4.3299E-01 | -4.9153E-01 |
| CCNA_02517 | 5.6678E-05 | 5.1512E-05 | 1.3775E-01  | -1.2749E-01 |
| CCNA_02518 | 4.7883E-05 | 1.2051E-04 | -1.3315E+00 | -1.0647E+00 |
| CCNA_02519 | 1.0456E-04 | 1.0147E-04 | 4.3098E-02  | -1.8786E-01 |
| CCNA_02520 | 1.6946E-04 | 1.1953E-04 | 5.0344E-01  | 1.0577E-01  |
| CCNA_02521 | 1.7158E-04 | 1.3447E-04 | 3.5162E-01  | 8.9235E-03  |
| CCNA_02522 | 8.8843E-05 | 1.3726E-04 | -6.2757E-01 | -6.1564E-01 |
| CCNA_02523 | 1.1669E-04 | 8.6450E-05 | 4.3271E-01  | 6.0647E-02  |
| CCNA_04001 | 2.1283E-04 | 1.2392E-04 | 7.8014E-01  | 2.8226E-01  |
| CCNA_02525 | 2.5998E-04 | 1.6393E-04 | 6.6529E-01  | 2.0900E-01  |
| CCNA_02526 | 5.8671E-05 | 3.2104E-05 | 8.6963E-01  | 3.3934E-01  |
| CCNA_02527 | 5.7339E-05 | 9.3867E-05 | -7.1112E-01 | -6.6893E-01 |
| CCNA_02528 | 4.6595E-04 | 1.6104E-04 | 1.5327E+00  | 7.6225E-01  |
| CCNA_02529 | 6.6106E-05 | 1.2281E-04 | -8.9351E-01 | -7.8527E-01 |
| CCNA_02530 | 1.7655E-04 | 2.6999E-05 | 2.7087E+00  | 1.5124E+00  |
| CCNA_02531 | 5.6604E-05 | 1.2218E-04 | -1.1100E+00 | -9.2334E-01 |
| CCNA_02532 | 1.1432E-04 | 1.1293E-04 | 1.7600E-02  | -2.0413E-01 |
| CCNA_02533 | 7.1350E-05 | 1.5765E-04 | -1.1437E+00 | -9.4488E-01 |
| CCNA_02534 | 2.1413E-04 | 1.8191E-04 | 2.3526E-01  | -6.5292E-02 |
| CCNA_02535 | 2.2588E-04 | 1.6952E-04 | 4.1405E-01  | 4.8750E-02  |
| CCNA_04018 | 1.1089E-04 | 1.5975E-04 | -5.2674E-01 | -5.5133E-01 |
| CCNA_02537 | 4.5201E-05 | 4.1062E-05 | 1.3839E-01  | -1.2708E-01 |
| CCNA_02538 | 1.8792E-04 | 1.1964E-04 | 6.5139E-01  | 2.0013E-01  |
| CCNA_02539 | 1.8829E-04 | 1.6174E-04 | 2.1929E-01  | -7.5480E-02 |
| CCNA_02540 | 1.0915E-04 | 1.3958E-04 | -3.5476E-01 | -4.4163E-01 |
| CCNA_02541 | 1.0953E-04 | 1.4090E-04 | -3.6340E-01 | -4.4714E-01 |
| CCNA_02542 | 1.7740E-04 | 1.6267E-04 | 1.2509E-01  | -1.3556E-01 |



|            |            |            |             |             |
|------------|------------|------------|-------------|-------------|
| CCNA_02543 | 3.8875E-04 | 5.0892E-04 | -3.8859E-01 | -4.6321E-01 |
| CCNA_02544 | 1.0759E-04 | 6.5194E-05 | 7.2266E-01  | 2.4559E-01  |
| CCNA_02545 | 9.8244E-05 | 1.5264E-04 | -6.3569E-01 | -6.2082E-01 |
| CCNA_02546 | 2.5711E-04 | 1.0939E-04 | 1.2329E+00  | 5.7102E-01  |
| CCNA_02547 | 2.7093E-04 | 1.6243E-04 | 7.3807E-01  | 2.5542E-01  |
| CCNA_02548 | 2.9293E-04 | 1.5870E-04 | 8.8425E-01  | 3.4866E-01  |
| CCNA_02549 | 1.5621E-04 | 1.2842E-04 | 2.8249E-01  | -3.5166E-02 |
| CCNA_02550 | 5.6558E-05 | 1.4745E-04 | -1.3824E+00 | -1.0971E+00 |
| CCNA_02551 | 7.2710E-05 | 3.7068E-05 | 9.7174E-01  | 4.0447E-01  |
| CCNA_02552 | 1.7374E-04 | 1.5367E-04 | 1.7706E-01  | -1.0241E-01 |
| CCNA_02553 | 3.2422E-04 | 3.1491E-05 | 3.3636E+00  | 1.9301E+00  |
| CCNA_02554 | 1.9056E-04 | 2.2593E-04 | -2.4561E-01 | -3.7201E-01 |
| CCNA_02555 | 8.2504E-05 | 8.6923E-05 | -7.5336E-02 | -2.6340E-01 |
| CCNA_02556 | 8.9010E-05 | 1.3734E-04 | -6.2574E-01 | -6.1448E-01 |
| CCNA_02557 | 4.2019E-05 | 1.2972E-04 | -1.6262E+00 | -1.2526E+00 |
| CCNA_02558 | 6.3295E-05 | 1.4026E-04 | -1.1479E+00 | -9.4753E-01 |
| CCNA_02559 | 4.8299E-05 | 6.5393E-05 | -4.3719E-01 | -4.9421E-01 |
| CCNA_02560 | 5.6192E-05 | 6.8799E-05 | -2.9207E-01 | -4.0165E-01 |
| CCNA_02561 | 6.1186E-05 | 6.2236E-05 | -2.4616E-02 | -2.3105E-01 |
| CCNA_02562 | 3.9689E-04 | 1.6057E-04 | 1.3055E+00  | 6.1735E-01  |
| CCNA_02563 | 7.6941E-05 | 6.8783E-05 | 1.6162E-01  | -1.1226E-01 |
| CCNA_02564 | 9.5433E-05 | 1.1991E-04 | -3.2937E-01 | -4.2544E-01 |
| CCNA_02565 | 9.3708E-05 | 1.4025E-04 | -5.8177E-01 | -5.8643E-01 |
| CCNA_02566 | 1.4809E-04 | 1.5594E-04 | -7.4504E-02 | -2.6287E-01 |
| CCNA_02567 | 2.6191E-04 | 8.2456E-05 | 1.6673E+00  | 8.4811E-01  |
| CCNA_02568 | 1.0991E-04 | 1.6238E-04 | -5.6310E-01 | -5.7452E-01 |
| CCNA_02569 | 1.1036E-04 | 6.7042E-05 | 7.1895E-01  | 2.4322E-01  |
| CCNA_02570 | 1.2130E-04 | 2.5392E-05 | 2.2557E+00  | 1.2235E+00  |
| CCNA_02571 | 5.0930E-05 | 4.4037E-05 | 2.0965E-01  | -8.1629E-02 |
| CCNA_02572 | 5.7339E-05 | 5.6625E-05 | 1.7975E-02  | -2.0389E-01 |
| CCNA_02573 | 5.9684E-05 | 7.0324E-05 | -2.3674E-01 | -3.6635E-01 |
| CCNA_02574 | 5.3228E-05 | 1.1339E-04 | -1.0910E+00 | -9.1126E-01 |
| CCNA_02575 | 7.1992E-04 | 3.2485E-04 | 1.1480E+00  | 5.1690E-01  |
| CCNA_02576 | 7.3256E-04 | 2.8261E-04 | 1.3741E+00  | 6.6110E-01  |
| CCNA_02577 | 7.0282E-05 | 1.6243E-04 | -1.2085E+00 | -9.8621E-01 |
| CCNA_02578 | 5.1480E-05 | 5.6783E-05 | -1.4152E-01 | -3.0562E-01 |
| CCNA_02579 | 4.1700E-05 | 0.0000E+00 | 1.2297E+01  | 7.6282E+00  |
| CCNA_02580 | 9.0383E-05 | 9.3950E-05 | -5.5899E-02 | -2.5101E-01 |
| CCNA_02581 | 4.9386E-05 | 1.2756E-04 | -1.3690E+00 | -1.0886E+00 |
| CCNA_02582 | 4.8715E-05 | 6.0562E-05 | -3.1410E-01 | -4.1570E-01 |
| CCNA_02583 | 6.6032E-05 | 1.7278E-04 | -1.3877E+00 | -1.1005E+00 |
| CCNA_04012 | 5.9536E-05 | 1.2726E-04 | -1.0959E+00 | -9.1436E-01 |
| CCNA_02585 | 1.0029E-04 | 1.3340E-04 | -4.1169E-01 | -4.7794E-01 |
| CCNA_02586 | 9.9331E-05 | 1.5965E-04 | -6.8461E-01 | -6.5202E-01 |
| CCNA_02587 | 1.1737E-04 | 9.7920E-05 | 2.6132E-01  | -4.8671E-02 |
| CCNA_02588 | 2.7089E-04 | 2.4331E-05 | 3.4764E+00  | 2.0020E+00  |
| CCNA_02589 | 2.5641E-04 | 2.5715E-05 | 3.3173E+00  | 1.9006E+00  |
| CCNA_02590 | 2.0791E-04 | 1.2287E-04 | 7.5870E-01  | 2.6858E-01  |
| CCNA_02591 | 9.4804E-05 | 1.0384E-04 | -1.3135E-01 | -2.9913E-01 |
| CCNA_02592 | 8.4372E-05 | 1.6183E-04 | -9.3964E-01 | -8.1469E-01 |
| CCNA_02593 | 9.0059E-05 | 8.2854E-05 | 1.2024E-01  | -1.3866E-01 |
| CCNA_02594 | 7.9674E-05 | 1.1153E-04 | -4.8524E-01 | -5.2486E-01 |
| CCNA_02595 | 7.2483E-05 | 3.6819E-05 | 9.7695E-01  | 4.0779E-01  |

|            |            |            |             |             |
|------------|------------|------------|-------------|-------------|
| CCNA_02596 | 7.8388E-05 | 1.0302E-04 | -3.9431E-01 | -4.6686E-01 |
| CCNA_02597 | 1.4211E-04 | 1.4313E-04 | -1.0363E-02 | -2.2196E-01 |
| CCNA_02598 | 1.7222E-04 | 9.7323E-05 | 8.2332E-01  | 3.0980E-01  |
| CCNA_02599 | 1.2100E-04 | 1.3040E-04 | -1.0804E-01 | -2.8426E-01 |
| CCNA_02600 | 4.8826E-05 | 1.4674E-04 | -1.5875E+00 | -1.2279E+00 |
| CCNA_02601 | 1.6661E-04 | 3.0868E-04 | -8.8964E-01 | -7.8280E-01 |
| CCNA_02602 | 1.8163E-04 | 2.9725E-04 | -7.1066E-01 | -6.6864E-01 |
| CCNA_02603 | 8.4358E-05 | 6.5857E-05 | 3.5708E-01  | 1.2408E-02  |
| CCNA_02604 | 4.6692E-04 | 7.4501E-05 | 2.6477E+00  | 1.4735E+00  |
| CCNA_02605 | 5.4412E-05 | 7.4882E-05 | -4.6073E-01 | -5.0922E-01 |
| CCNA_02606 | 2.9220E-04 | 1.2008E-04 | 1.2829E+00  | 6.0294E-01  |
| CCNA_02607 | 2.8556E-04 | 1.1794E-04 | 1.2757E+00  | 5.9832E-01  |
| CCNA_02608 | 8.7655E-05 | 5.4255E-05 | 6.9192E-01  | 2.2599E-01  |
| CCNA_02609 | 4.8683E-05 | 1.4961E-04 | -1.6197E+00 | -1.2485E+00 |
| CCNA_02610 | 6.7762E-05 | 1.4551E-04 | -1.1026E+00 | -9.1862E-01 |
| CCNA_02611 | 1.2347E-04 | 1.5634E-04 | -3.4052E-01 | -4.3255E-01 |
| CCNA_02612 | 1.4963E-04 | 1.5952E-04 | -9.2371E-02 | -2.7427E-01 |
| CCNA_02613 | 6.3785E-05 | 8.9881E-05 | -4.9483E-01 | -5.3098E-01 |
| CCNA_02614 | 5.6451E-05 | 1.3856E-04 | -1.2954E+00 | -1.0416E+00 |
| CCNA_02615 | 5.8037E-05 | 7.4658E-05 | -3.6336E-01 | -4.4712E-01 |
| CCNA_02616 | 5.2146E-05 | 5.8200E-05 | -1.5853E-01 | -3.1647E-01 |
| CCNA_02617 | 1.2492E-03 | 1.3695E-04 | 3.1892E+00  | 1.8188E+00  |
| CCNA_02618 | 1.5147E-04 | 1.4710E-04 | 4.2267E-02  | -1.8839E-01 |
| CCNA_02619 | 1.5256E-04 | 1.0660E-04 | 5.1703E-01  | 1.1443E-01  |
| CCNA_02620 | 8.6383E-05 | 7.8942E-05 | 1.2988E-01  | -1.3251E-01 |
| CCNA_02621 | 4.9959E-05 | 5.9949E-05 | -2.6305E-01 | -3.8313E-01 |
| CCNA_02622 | 8.4635E-05 | 1.2585E-04 | -5.7236E-01 | -5.8043E-01 |
| CCNA_02623 | 5.2048E-04 | 1.0969E-04 | 2.2464E+00  | 1.2175E+00  |
| CCNA_02624 | 9.6135E-05 | 1.0347E-04 | -1.0615E-01 | -2.8306E-01 |
| CCNA_02625 | 2.2007E-04 | 1.6243E-04 | 4.3814E-01  | 6.4114E-02  |
| CCNA_02626 | 8.1098E-05 | 3.5783E-05 | 1.1801E+00  | 5.3738E-01  |
| CCNA_02627 | 6.6476E-05 | 5.8275E-05 | 1.8987E-01  | -9.4244E-02 |
| CCNA_02628 | 3.5412E-05 | 1.1667E-04 | -1.7201E+00 | -1.3125E+00 |
| CCNA_02629 | 1.0213E-04 | 1.0588E-04 | -5.2079E-02 | -2.4857E-01 |
| CCNA_02630 | 1.3650E-04 | 1.6277E-04 | -2.5393E-01 | -3.7732E-01 |
| CCNA_02631 | 9.3527E-05 | 1.0244E-04 | -1.3143E-01 | -2.9918E-01 |
| CCNA_02632 | 7.1789E-05 | 5.3004E-05 | 4.3754E-01  | 6.3729E-02  |
| CCNA_02633 | 5.7875E-05 | 1.3616E-04 | -1.2342E+00 | -1.0026E+00 |
| CCNA_02634 | 5.9448E-05 | 4.2397E-05 | 4.8750E-01  | 9.5599E-02  |
| CCNA_02635 | 1.2240E-04 | 1.6243E-04 | -4.0819E-01 | -4.7571E-01 |
| CCNA_02636 | 1.3283E-04 | 1.5634E-04 | -2.3506E-01 | -3.6528E-01 |
| CCNA_02637 | 1.2715E-04 | 1.2847E-04 | -1.4993E-02 | -2.2491E-01 |
| CCNA_02638 | 5.5600E-05 | 1.4515E-04 | -1.3843E+00 | -1.0983E+00 |
| CCNA_02639 | 5.9286E-05 | 9.4033E-05 | -6.6550E-01 | -6.3983E-01 |
| CCNA_02640 | 2.6040E-04 | 1.0641E-04 | 1.2911E+00  | 6.0815E-01  |
| CCNA_02641 | 4.4979E-05 | 1.4227E-04 | -1.6613E+00 | -1.2750E+00 |
| CCNA_02642 | 4.9131E-05 | 5.5871E-05 | -1.8554E-01 | -3.3370E-01 |
| CCNA_02643 | 4.3925E-05 | 1.1818E-04 | -1.4279E+00 | -1.1261E+00 |
| CCNA_02644 | 4.7753E-05 | 3.2361E-05 | 5.6112E-01  | 1.4255E-01  |
| CCNA_02645 | 1.2452E-04 | 1.4908E-05 | 3.0615E+00  | 1.7374E+00  |
| CCNA_02646 | 9.1983E-05 | 1.5928E-04 | -7.9210E-01 | -7.2059E-01 |
| CCNA_02647 | 4.9820E-05 | 9.0809E-05 | -8.6611E-01 | -7.6779E-01 |
| CCNA_02648 | 6.4941E-05 | 1.0414E-04 | -6.8126E-01 | -6.4989E-01 |

|            |            |            |             |             |
|------------|------------|------------|-------------|-------------|
| CCNA_02649 | 4.9954E-05 | 3.7375E-05 | 4.1837E-01  | 5.1500E-02  |
| CCNA_02650 | 1.2778E-04 | 5.8291E-05 | 1.1322E+00  | 5.0681E-01  |
| CCNA_02651 | 7.8120E-05 | 1.5627E-04 | -1.0003E+00 | -8.5336E-01 |
| CCNA_02652 | 7.8037E-05 | 1.5589E-04 | -9.9827E-01 | -8.5209E-01 |
| CCNA_02653 | 6.4298E-05 | 6.6901E-05 | -5.7328E-02 | -2.5192E-01 |
| CCNA_02654 | 5.8509E-05 | 2.8027E-05 | 1.0615E+00  | 4.6174E-01  |
| CCNA_02655 | 5.1850E-05 | 8.0600E-05 | -6.3645E-01 | -6.2130E-01 |
| CCNA_02656 | 5.2965E-05 | 4.6175E-05 | 1.9777E-01  | -8.9204E-02 |
| CCNA_02657 | 5.5711E-05 | 8.0931E-05 | -5.3875E-01 | -5.5899E-01 |
| CCNA_02658 | 2.3735E-04 | 4.4982E-05 | 2.3994E+00  | 1.3151E+00  |
| CCNA_02659 | 2.4749E-04 | 5.3750E-05 | 2.2028E+00  | 1.1897E+00  |
| CCNA_02660 | 9.2020E-05 | 1.6038E-04 | -8.0147E-01 | -7.2656E-01 |
| CCNA_02661 | 7.2358E-05 | 1.5555E-04 | -1.1041E+00 | -9.1960E-01 |
| CCNA_02662 | 1.7447E-04 | 4.5280E-05 | 1.9458E+00  | 1.0257E+00  |
| CCNA_02663 | 2.6744E-04 | 1.6274E-04 | 7.1659E-01  | 2.4172E-01  |
| CCNA_02664 | 1.4526E-04 | 1.2507E-04 | 2.1589E-01  | -7.7645E-02 |
| CCNA_02665 | 1.3958E-04 | 1.3973E-04 | -1.5757E-03 | -2.1636E-01 |
| CCNA_02666 | 5.8467E-05 | 5.2424E-05 | 1.5729E-01  | -1.1502E-01 |
| CCNA_02667 | 8.3789E-05 | 9.8442E-05 | -2.3255E-01 | -3.6368E-01 |
| CCNA_02668 | 4.8720E-05 | 7.9274E-05 | -7.0235E-01 | -6.6334E-01 |
| CCNA_02669 | 3.2835E-04 | 1.2972E-04 | 1.3398E+00  | 6.3924E-01  |
| CCNA_02670 | 1.4182E-04 | 1.6243E-04 | -1.9573E-01 | -3.4020E-01 |
| CCNA_02671 | 9.0808E-05 | 5.5573E-05 | 7.0830E-01  | 2.3643E-01  |
| CCNA_02672 | 2.0539E-04 | 1.4585E-04 | 4.9381E-01  | 9.9620E-02  |
| CCNA_02673 | 1.8709E-04 | 1.3885E-04 | 4.3017E-01  | 5.9032E-02  |
| CCNA_02674 | 8.3327E-05 | 0.0000E+00 | 1.3296E+01  | 8.2652E+00  |
| CCNA_02675 | 0.0000E+00 | 0.0000E+00 | -8.4168E-01 | -7.5221E-01 |
| CCNA_02676 | 1.4029E-04 | 1.4972E-04 | -9.3943E-02 | -2.7527E-01 |
| CCNA_02677 | 1.4634E-04 | 1.5784E-04 | -1.0920E-01 | -2.8501E-01 |
| CCNA_02678 | 5.4172E-05 | 1.5075E-04 | -1.4765E+00 | -1.1571E+00 |
| CCNA_02679 | 4.2707E-04 | 1.6276E-04 | 1.3917E+00  | 6.7233E-01  |
| CCNA_02680 | 1.1506E-04 | 5.2142E-05 | 1.1417E+00  | 5.1288E-01  |
| CCNA_02681 | 1.1071E-04 | 5.8067E-05 | 9.3085E-01  | 3.7838E-01  |
| CCNA_02682 | 4.9954E-05 | 4.0242E-05 | 3.1175E-01  | -1.6505E-02 |
| CCNA_02683 | 7.2696E-05 | 5.1968E-05 | 4.8411E-01  | 9.3433E-02  |
| CCNA_02684 | 7.7371E-05 | 9.6892E-05 | -3.2463E-01 | -4.2241E-01 |
| CCNA_02685 | 6.1455E-05 | 4.2728E-05 | 5.2417E-01  | 1.1898E-01  |
| CCNA_02686 | 9.6700E-05 | 4.7767E-05 | 1.0173E+00  | 4.3354E-01  |
| CCNA_02687 | 5.1628E-05 | 1.4044E-04 | -1.4437E+00 | -1.1362E+00 |
| CCNA_02688 | 2.9386E-05 | 6.1714E-05 | -1.0704E+00 | -8.9811E-01 |
| CCNA_02689 | 5.1429E-05 | 1.3137E-04 | -1.3529E+00 | -1.0783E+00 |
| CCNA_02690 | 1.0838E-04 | 1.6267E-04 | -5.8584E-01 | -5.8903E-01 |
| CCNA_02691 | 1.2350E-04 | 6.7879E-05 | 8.6330E-01  | 3.3530E-01  |
| CCNA_02692 | 6.6250E-05 | 5.5532E-05 | 2.5449E-01  | -5.3025E-02 |
| CCNA_02693 | 8.6490E-05 | 5.4943E-05 | 6.5445E-01  | 2.0208E-01  |
| CCNA_02694 | 1.0454E-04 | 9.9701E-05 | 6.8341E-02  | -1.7176E-01 |
| CCNA_02695 | 1.0894E-04 | 1.3227E-04 | -2.7998E-01 | -3.9394E-01 |
| CCNA_02696 | 8.3433E-05 | 1.8538E-05 | 2.1696E+00  | 1.1685E+00  |
| CCNA_02697 | 5.1198E-05 | 5.3932E-05 | -7.5141E-02 | -2.6328E-01 |
| CCNA_02698 | 9.2108E-05 | 1.6166E-04 | -8.1160E-01 | -7.3303E-01 |
| CCNA_02699 | 4.0470E-05 | 1.8679E-05 | 1.1150E+00  | 4.9582E-01  |
| CCNA_02700 | 4.5478E-05 | 5.0675E-05 | -1.5620E-01 | -3.1498E-01 |
| CCNA_02701 | 5.3714E-05 | 1.3359E-04 | -1.3144E+00 | -1.0537E+00 |

|            |            |            |             |             |
|------------|------------|------------|-------------|-------------|
| CCNA_02702 | 6.0978E-05 | 1.3661E-04 | -1.1637E+00 | -9.5761E-01 |
| CCNA_02703 | 1.1725E-04 | 8.7445E-05 | 4.2305E-01  | 5.4488E-02  |
| CCNA_02704 | 1.3226E-04 | 1.3176E-04 | 5.3693E-03  | -2.1193E-01 |
| CCNA_02705 | 1.6021E-04 | 1.1591E-04 | 4.6690E-01  | 8.2459E-02  |
| CCNA_02706 | 4.6259E-04 | 4.5579E-06 | 6.6626E+00  | 4.0344E+00  |
| CCNA_02707 | 1.9629E-04 | 3.4085E-04 | -7.9618E-01 | -7.2319E-01 |
| CCNA_02708 | 4.1134E-04 | 5.5260E-04 | -4.2591E-01 | -4.8701E-01 |
| CCNA_02709 | 7.3181E-05 | 2.4861E-08 | 1.1108E+01  | 6.8701E+00  |
| CCNA_02710 | 2.6871E-04 | 1.2281E-04 | 1.1296E+00  | 5.0515E-01  |
| CCNA_02711 | 2.6295E-04 | 1.1519E-04 | 1.1907E+00  | 5.4413E-01  |
| CCNA_02712 | 1.0304E-04 | 9.5732E-05 | 1.0606E-01  | -1.4770E-01 |
| CCNA_02713 | 6.4169E-05 | 4.4220E-05 | 5.3702E-01  | 1.2718E-01  |
| CCNA_02714 | 5.7487E-05 | 3.3347E-05 | 7.8543E-01  | 2.8563E-01  |
| CCNA_02715 | 1.4703E-04 | 4.7261E-05 | 1.6372E+00  | 8.2893E-01  |
| CCNA_02716 | 1.0561E-04 | 7.0117E-05 | 5.9088E-01  | 1.6153E-01  |
| CCNA_02717 | 6.2467E-05 | 1.4626E-04 | -1.2273E+00 | -9.9819E-01 |
| CCNA_02718 | 5.2636E-05 | 6.3487E-05 | -2.7047E-01 | -3.8787E-01 |
| CCNA_02719 | 1.6050E-04 | 1.6243E-04 | -1.7256E-02 | -2.2636E-01 |
| CCNA_02720 | 7.8041E-05 | 1.5741E-04 | -1.0122E+00 | -8.6100E-01 |
| CCNA_02721 | 1.7006E-04 | 1.1266E-04 | 5.9398E-01  | 1.6351E-01  |
| CCNA_02722 | 1.1644E-04 | 9.5599E-05 | 2.8450E-01  | -3.3884E-02 |
| CCNA_02723 | 7.1577E-05 | 7.2031E-05 | -9.2003E-03 | -2.2122E-01 |
| CCNA_02724 | 6.6740E-05 | 1.5755E-04 | -1.2391E+00 | -1.0057E+00 |
| CCNA_02725 | 3.3261E-04 | 3.0389E-05 | 3.4518E+00  | 1.9864E+00  |
| CCNA_02726 | 5.3214E-04 | 7.3937E-05 | 2.8473E+00  | 1.6008E+00  |
| CCNA_02727 | 3.9610E-04 | 1.3663E-04 | 1.5355E+00  | 7.6407E-01  |
| CCNA_02728 | 1.9362E-04 | 1.0399E-04 | 8.9673E-01  | 3.5662E-01  |
| CCNA_02729 | 1.0622E-04 | 1.3289E-04 | -3.2327E-01 | -4.2155E-01 |
| CCNA_02730 | 6.5778E-05 | 6.0205E-05 | 1.2762E-01  | -1.3395E-01 |
| CCNA_02731 | 1.7096E-04 | 1.6243E-04 | 7.3826E-02  | -1.6826E-01 |
| CCNA_02732 | 1.6540E-04 | 1.4710E-04 | 1.6909E-01  | -1.0750E-01 |
| CCNA_02733 | 7.5831E-05 | 5.9203E-05 | 3.5701E-01  | 1.2365E-02  |
| CCNA_02734 | 1.4622E-04 | 1.6243E-04 | -1.5168E-01 | -3.1210E-01 |
| CCNA_02735 | 6.9024E-05 | 8.6509E-05 | -3.2578E-01 | -4.2315E-01 |
| CCNA_02736 | 7.4000E-05 | 1.6180E-04 | -1.1286E+00 | -9.3525E-01 |
| CCNA_02737 | 1.0848E-04 | 1.2402E-04 | -1.9310E-01 | -3.3852E-01 |
| CCNA_02738 | 1.1739E-04 | 6.1076E-05 | 9.4253E-01  | 3.8584E-01  |
| CCNA_02739 | 0.0000E+00 | 0.0000E+00 | -8.4168E-01 | -7.5221E-01 |
| CCNA_02740 | 8.1010E-05 | 7.3664E-05 | 1.3707E-01  | -1.2792E-01 |
| CCNA_02741 | 8.3609E-05 | 7.9340E-05 | 7.5530E-02  | -1.6718E-01 |
| CCNA_02742 | 7.1008E-05 | 2.9949E-05 | 1.2451E+00  | 5.7886E-01  |
| CCNA_02743 | 7.1845E-05 | 1.2066E-04 | -7.4799E-01 | -6.9245E-01 |
| CCNA_02744 | 7.7010E-05 | 1.0163E-04 | -4.0027E-01 | -4.7066E-01 |
| CCNA_02745 | 6.6985E-05 | 3.9223E-05 | 7.7195E-01  | 2.7703E-01  |
| CCNA_02746 | 7.5535E-05 | 1.3950E-04 | -8.8500E-01 | -7.7984E-01 |
| CCNA_02747 | 1.4833E-04 | 1.3956E-04 | 8.7886E-02  | -1.5929E-01 |
| CCNA_02748 | 1.3710E-04 | 1.6276E-04 | -2.4756E-01 | -3.7326E-01 |
| CCNA_02749 | 9.0096E-05 | 4.2256E-05 | 1.0921E+00  | 4.8125E-01  |
| CCNA_02750 | 6.1603E-05 | 4.3142E-05 | 5.1371E-01  | 1.1232E-01  |
| CCNA_02751 | 5.7501E-05 | 1.0054E-04 | -8.0609E-01 | -7.2951E-01 |
| CCNA_02752 | 1.3942E-04 | 1.6267E-04 | -2.2256E-01 | -3.5731E-01 |
| CCNA_02753 | 5.2590E-05 | 2.0552E-05 | 1.3551E+00  | 6.4897E-01  |
| CCNA_02754 | 2.4083E-04 | 1.6243E-04 | 5.6818E-01  | 1.4706E-01  |

|            |            |            |             |             |
|------------|------------|------------|-------------|-------------|
| CCNA_02755 | 2.8061E-04 | 1.0091E-04 | 1.4754E+00  | 7.2572E-01  |
| CCNA_02756 | 1.1195E-04 | 1.4439E-04 | -3.6709E-01 | -4.4950E-01 |
| CCNA_02757 | 1.2158E-04 | 1.6098E-04 | -4.0501E-01 | -4.7368E-01 |
| CCNA_02758 | 7.1105E-05 | 9.5467E-05 | -4.2508E-01 | -4.8648E-01 |
| CCNA_02759 | 1.8885E-04 | 1.5099E-04 | 3.2274E-01  | -9.4967E-03 |
| CCNA_02760 | 3.2010E-04 | 8.3774E-05 | 1.9339E+00  | 1.0181E+00  |
| CCNA_02761 | 1.3035E-04 | 3.9463E-05 | 1.7236E+00  | 8.8404E-01  |
| CCNA_02762 | 1.8277E-04 | 9.7994E-05 | 8.9916E-01  | 3.5817E-01  |
| CCNA_02763 | 1.3219E-04 | 6.8592E-05 | 9.4633E-01  | 3.8825E-01  |
| CCNA_02764 | 2.0888E-04 | 1.2894E-04 | 6.9594E-01  | 2.2855E-01  |
| CCNA_02765 | 1.3933E-04 | 1.3449E-04 | 5.0954E-02  | -1.8285E-01 |
| CCNA_02766 | 1.9109E-04 | 9.7505E-05 | 9.7059E-01  | 4.0373E-01  |
| CCNA_02767 | 1.5221E-04 | 2.1488E-05 | 2.8239E+00  | 1.5859E+00  |
| CCNA_02768 | 1.3315E-04 | 1.6243E-04 | -2.8679E-01 | -3.9828E-01 |
| CCNA_02769 | 5.2183E-05 | 1.1525E-04 | -1.1431E+00 | -9.4444E-01 |
| CCNA_02770 | 3.2887E-05 | 0.0000E+00 | 1.1955E+01  | 7.4098E+00  |
| CCNA_02771 | 1.2846E-04 | 0.0000E+00 | 1.3920E+01  | 8.6635E+00  |
| CCNA_02772 | 9.6644E-07 | 0.0000E+00 | 6.8726E+00  | 4.1683E+00  |
| CCNA_02773 | 5.8296E-05 | 5.2424E-05 | 1.5307E-01  | -1.1772E-01 |
| CCNA_02774 | 1.3353E-04 | 7.2304E-05 | 8.8490E-01  | 3.4907E-01  |
| CCNA_02775 | 1.5563E-04 | 1.6516E-04 | -8.5744E-02 | -2.7004E-01 |
| CCNA_02776 | 9.4845E-05 | 7.8395E-06 | 3.5953E+00  | 2.0779E+00  |
| CCNA_02777 | 2.9968E-04 | 1.6119E-04 | 8.9460E-01  | 3.5526E-01  |
| CCNA_02778 | 1.4485E-04 | 9.0528E-05 | 6.7805E-01  | 2.1714E-01  |
| CCNA_02779 | 4.7359E-04 | 1.2332E-04 | 1.9412E+00  | 1.0228E+00  |
| CCNA_02780 | 1.0815E-04 | 8.0451E-05 | 4.2676E-01  | 5.6851E-02  |
| CCNA_02781 | 1.6866E-04 | 6.5708E-05 | 1.3599E+00  | 6.5203E-01  |
| CCNA_02782 | 1.0566E-03 | 1.6659E-04 | 2.6650E+00  | 1.4845E+00  |
| CCNA_02783 | 1.1074E-03 | 1.7079E-04 | 2.6968E+00  | 1.5048E+00  |
| CCNA_02784 | 8.0367E-05 | 1.6222E-04 | -1.0133E+00 | -8.6165E-01 |
| CCNA_02785 | 8.7576E-05 | 8.1752E-05 | 9.9219E-02  | -1.5207E-01 |
| CCNA_02786 | 1.1783E-04 | 5.1512E-05 | 1.1935E+00  | 5.4592E-01  |
| CCNA_02787 | 9.3847E-05 | 4.1949E-05 | 1.1615E+00  | 5.2547E-01  |
| CCNA_02788 | 1.6714E-04 | 1.4301E-04 | 2.2489E-01  | -7.1907E-02 |
| CCNA_02789 | 2.4224E-04 | 9.8666E-05 | 1.2957E+00  | 6.1113E-01  |
| CCNA_02790 | 2.2779E-04 | 1.0473E-04 | 1.1209E+00  | 4.9963E-01  |
| CCNA_02791 | 1.3889E-04 | 9.0710E-05 | 6.1453E-01  | 1.7662E-01  |
| CCNA_02792 | 5.0449E-05 | 5.5623E-05 | -1.4093E-01 | -3.0524E-01 |
| CCNA_02793 | 6.1787E-05 | 0.0000E+00 | 1.2864E+01  | 7.9900E+00  |
| CCNA_02794 | 2.1817E-04 | 1.2653E-04 | 7.8586E-01  | 2.8590E-01  |
| CCNA_02795 | 6.5399E-05 | 9.6005E-05 | -5.5387E-01 | -5.6863E-01 |
| CCNA_02796 | 6.9968E-05 | 9.7116E-05 | -4.7305E-01 | -5.1708E-01 |
| CCNA_02797 | 6.6458E-05 | 5.5747E-05 | 2.5343E-01  | -5.3702E-02 |
| CCNA_02798 | 7.0772E-05 | 6.8153E-05 | 5.4330E-02  | -1.8070E-01 |
| CCNA_02799 | 6.8941E-05 | 8.3103E-05 | -2.6958E-01 | -3.8730E-01 |
| CCNA_02800 | 7.7796E-05 | 1.4884E-05 | 2.3853E+00  | 1.3061E+00  |
| CCNA_02801 | 8.0871E-05 | 7.7774E-05 | 5.6268E-02  | -1.7946E-01 |
| CCNA_02802 | 7.6612E-05 | 1.4213E-04 | -8.9157E-01 | -7.8403E-01 |
| CCNA_02803 | 4.5577E-04 | 1.6258E-04 | 1.4871E+00  | 7.3320E-01  |
| CCNA_02804 | 1.2526E-04 | 5.6128E-05 | 1.1579E+00  | 5.2324E-01  |
| CCNA_02805 | 4.5577E-04 | 1.6258E-04 | 1.4871E+00  | 7.3320E-01  |
| CCNA_02806 | 1.4455E-04 | 1.1738E-04 | 3.0031E-01  | -2.3803E-02 |
| CCNA_02807 | 5.2206E-05 | 9.7613E-05 | -9.0285E-01 | -7.9122E-01 |

|            |            |            |             |             |
|------------|------------|------------|-------------|-------------|
| CCNA_02808 | 6.6444E-05 | 6.2377E-05 | 9.1042E-02  | -1.5728E-01 |
| CCNA_02809 | 5.1610E-05 | 1.3651E-04 | -1.4033E+00 | -1.1104E+00 |
| CCNA_02810 | 5.5513E-05 | 3.8543E-05 | 5.2615E-01  | 1.2025E-01  |
| CCNA_02811 | 5.4283E-05 | 1.2304E-04 | -1.1805E+00 | -9.6833E-01 |
| CCNA_02812 | 6.0460E-05 | 3.1806E-05 | 9.2644E-01  | 3.7557E-01  |
| CCNA_02813 | 5.3099E-05 | 0.0000E+00 | 1.2646E+01  | 7.8506E+00  |
| CCNA_02814 | 0.0000E+00 | 0.0000E+00 | -8.4168E-01 | -7.5221E-01 |
| CCNA_02815 | 8.1426E-05 | 5.0418E-05 | 6.9139E-01  | 2.2564E-01  |
| CCNA_02816 | 2.8575E-04 | 1.1640E-04 | 1.2956E+00  | 6.1103E-01  |
| CCNA_02817 | 3.1596E-04 | 1.3419E-04 | 1.2354E+00  | 5.7261E-01  |
| CCNA_02818 | 3.3813E-04 | 1.1540E-04 | 1.5509E+00  | 7.7388E-01  |
| CCNA_02819 | 7.0851E-05 | 1.4061E-04 | -9.8880E-01 | -8.4605E-01 |
| CCNA_02820 | 8.0954E-05 | 1.2039E-04 | -5.7250E-01 | -5.8052E-01 |
| CCNA_02821 | 6.1223E-05 | 6.7332E-05 | -1.3728E-01 | -3.0292E-01 |
| CCNA_02822 | 1.2195E-04 | 2.7878E-05 | 2.1287E+00  | 1.1424E+00  |
| CCNA_02823 | 8.2101E-05 | 1.4669E-04 | -8.3729E-01 | -7.4941E-01 |
| CCNA_02824 | 8.5542E-05 | 1.5131E-04 | -8.2284E-01 | -7.4019E-01 |
| CCNA_02825 | 6.7378E-05 | 5.5813E-05 | 2.7156E-01  | -4.2142E-02 |
| CCNA_02826 | 1.9284E-04 | 7.4376E-05 | 1.3743E+00  | 6.6125E-01  |
| CCNA_02827 | 3.7677E-05 | 2.7347E-07 | 7.0633E+00  | 4.2899E+00  |
| CCNA_02828 | 3.2831E-07 | 0.0000E+00 | 5.3282E+00  | 3.1832E+00  |
| CCNA_02829 | 2.1622E-05 | 0.0000E+00 | 1.1350E+01  | 7.0240E+00  |
| CCNA_02830 | 1.0202E-04 | 5.4446E-05 | 9.0576E-01  | 3.6238E-01  |
| CCNA_02831 | 8.6013E-05 | 8.3219E-05 | 4.7588E-02  | -1.8500E-01 |
| CCNA_02832 | 1.9360E-04 | 1.5856E-04 | 2.8795E-01  | -3.1682E-02 |
| CCNA_02833 | 5.4689E-05 | 9.5616E-05 | -8.0599E-01 | -7.2945E-01 |
| CCNA_02834 | 6.3115E-05 | 1.0864E-04 | -7.8356E-01 | -7.1514E-01 |
| CCNA_02835 | 6.5450E-05 | 6.0744E-06 | 3.4277E+00  | 1.9710E+00  |
| CCNA_02836 | 5.3469E-05 | 1.4277E-04 | -1.4169E+00 | -1.1191E+00 |
| CCNA_02837 | 7.6247E-05 | 1.4309E-04 | -9.0819E-01 | -7.9463E-01 |
| CCNA_02838 | 6.6897E-05 | 5.8258E-06 | 3.5195E+00  | 2.0295E+00  |
| CCNA_02839 | 6.7914E-05 | 5.9982E-05 | 1.7910E-01  | -1.0112E-01 |
| CCNA_02840 | 7.5873E-05 | 1.3435E-04 | -8.2434E-01 | -7.4115E-01 |
| CCNA_02841 | 4.3763E-05 | 5.9667E-07 | 6.1769E+00  | 3.7245E+00  |
| CCNA_02842 | 7.3843E-05 | 1.4995E-04 | -1.0220E+00 | -8.6722E-01 |
| CCNA_02843 | 1.0887E-04 | 9.5947E-05 | 1.8217E-01  | -9.9156E-02 |
| CCNA_02844 | 1.1251E-04 | 1.6243E-04 | -5.2975E-01 | -5.5325E-01 |
| CCNA_02845 | 1.6602E-04 | 1.2303E-04 | 4.3225E-01  | 6.0358E-02  |
| CCNA_02846 | 1.0532E-04 | 1.6243E-04 | -6.2503E-01 | -6.1402E-01 |
| CCNA_02847 | 8.5380E-05 | 1.4746E-04 | -7.8836E-01 | -7.1820E-01 |
| CCNA_02848 | 5.6854E-05 | 4.3051E-05 | 4.0104E-01  | 4.0446E-02  |
| CCNA_02849 | 1.0220E-04 | 1.0824E-04 | -8.2879E-02 | -2.6821E-01 |
| CCNA_02850 | 2.6353E-04 | 1.2963E-04 | 1.0234E+00  | 4.3744E-01  |
| CCNA_02851 | 2.6330E-04 | 1.1594E-04 | 1.1833E+00  | 5.3940E-01  |
| CCNA_02852 | 1.3884E-04 | 1.4355E-04 | -4.8108E-02 | -2.4604E-01 |
| CCNA_02853 | 5.7122E-05 | 1.2642E-04 | -1.1461E+00 | -9.4637E-01 |
| CCNA_02854 | 7.4083E-05 | 9.1572E-05 | -3.0580E-01 | -4.1041E-01 |
| CCNA_02855 | 1.0002E-04 | 4.2314E-05 | 1.2409E+00  | 5.7613E-01  |
| CCNA_02856 | 5.4560E-05 | 2.9436E-05 | 8.9000E-01  | 3.5233E-01  |
| CCNA_02857 | 6.1501E-05 | 9.2832E-05 | -5.9403E-01 | -5.9425E-01 |
| CCNA_02858 | 4.5474E-05 | 4.6739E-06 | 3.2799E+00  | 1.8767E+00  |
| CCNA_02859 | 5.3834E-05 | 9.4497E-05 | -8.1176E-01 | -7.3312E-01 |
| CCNA_02860 | 1.0499E-04 | 9.0536E-05 | 2.1363E-01  | -7.9090E-02 |

|            |            |            |             |             |
|------------|------------|------------|-------------|-------------|
| CCNA_02861 | 5.3127E-05 | 4.1518E-05 | 3.5553E-01  | 1.1420E-02  |
| CCNA_02862 | 4.1599E-05 | 9.6204E-05 | -1.2095E+00 | -9.8684E-01 |
| CCNA_02863 | 4.3564E-05 | 3.5974E-05 | 2.7599E-01  | -3.9311E-02 |
| CCNA_02864 | 5.2794E-05 | 5.4769E-05 | -5.3092E-02 | -2.4922E-01 |
| CCNA_02865 | 2.7220E-04 | 1.4158E-04 | 9.4305E-01  | 3.8616E-01  |
| CCNA_02866 | 2.3608E-04 | 1.1101E-04 | 1.0885E+00  | 4.7893E-01  |
| CCNA_02867 | 4.9880E-05 | 4.8123E-05 | 5.1634E-02  | -1.8242E-01 |
| CCNA_02868 | 4.4419E-05 | 5.2208E-07 | 6.3882E+00  | 3.8593E+00  |
| CCNA_02869 | 4.1534E-05 | 9.1108E-05 | -1.1333E+00 | -9.3819E-01 |
| CCNA_02870 | 4.4600E-05 | 9.1820E-06 | 2.2790E+00  | 1.2383E+00  |
| CCNA_02871 | 5.2530E-05 | 4.9407E-05 | 8.8300E-02  | -1.5903E-01 |
| CCNA_02872 | 4.5501E-05 | 1.3970E-04 | -1.6183E+00 | -1.2476E+00 |
| CCNA_02873 | 4.5344E-05 | 1.3950E-04 | -1.6212E+00 | -1.2494E+00 |
| CCNA_02874 | 3.6512E-05 | 9.6486E-05 | -1.4019E+00 | -1.1095E+00 |
| CCNA_02875 | 3.2854E-05 | 5.8838E-07 | 5.7832E+00  | 3.4734E+00  |
| CCNA_02877 | 6.0285E-05 | 1.4516E-04 | -1.2677E+00 | -1.0240E+00 |
| CCNA_02876 | 5.0394E-05 | 6.6015E-05 | -3.8959E-01 | -4.6385E-01 |
| CCNA_02878 | 3.3724E-05 | 3.7441E-05 | -1.5097E-01 | -3.1165E-01 |
| CCNA_02879 | 3.0311E-05 | 7.8686E-05 | -1.3762E+00 | -1.0931E+00 |
| CCNA_02880 | 7.6275E-05 | 1.1541E-04 | -5.9745E-01 | -5.9643E-01 |
| CCNA_02881 | 7.2640E-05 | 9.9329E-05 | -4.5147E-01 | -5.0332E-01 |
| CCNA_02882 | 5.8463E-05 | 7.3680E-05 | -3.3381E-01 | -4.2827E-01 |
| CCNA_02883 | 7.2724E-05 | 2.6618E-05 | 1.4497E+00  | 7.0930E-01  |
| CCNA_02884 | 6.5908E-05 | 4.5562E-05 | 5.3245E-01  | 1.2426E-01  |
| CCNA_02885 | 5.4528E-05 | 6.1498E-05 | -1.7363E-01 | -3.2610E-01 |
| CCNA_02886 | 7.7075E-05 | 5.3219E-05 | 5.3417E-01  | 1.2536E-01  |
| CCNA_02887 | 4.5025E-05 | 1.1756E-04 | -1.3846E+00 | -1.0985E+00 |
| CCNA_02888 | 4.0253E-05 | 6.1357E-05 | -6.0817E-01 | -6.0327E-01 |
| CCNA_02889 | 1.1599E-04 | 3.5767E-05 | 1.6970E+00  | 8.6706E-01  |
| CCNA_02890 | 1.5621E-04 | 1.4322E-04 | 1.2526E-01  | -1.3545E-01 |
| CCNA_02891 | 1.3851E-04 | 6.4838E-05 | 1.0949E+00  | 4.8303E-01  |
| CCNA_02892 | 5.5397E-05 | 7.5851E-05 | -4.5341E-01 | -5.0455E-01 |
| CCNA_02893 | 4.9746E-05 | 5.9178E-05 | -2.5054E-01 | -3.7515E-01 |
| CCNA_02894 | 4.6176E-05 | 1.5538E-05 | 1.5707E+00  | 7.8651E-01  |
| CCNA_02895 | 2.3192E-04 | 1.3300E-04 | 8.0217E-01  | 2.9631E-01  |
| CCNA_02896 | 1.1067E-04 | 9.9685E-05 | 1.5075E-01  | -1.1920E-01 |
| CCNA_02897 | 5.8578E-05 | 7.9042E-05 | -4.3229E-01 | -4.9108E-01 |
| CCNA_02898 | 4.8669E-05 | 1.2107E-05 | 2.0063E+00  | 1.0643E+00  |
| CCNA_02899 | 8.8150E-05 | 5.1280E-05 | 7.8139E-01  | 2.8305E-01  |
| CCNA_02900 | 5.3145E-05 | 1.3473E-04 | -1.3420E+00 | -1.0714E+00 |
| CCNA_02901 | 8.7618E-05 | 5.7504E-05 | 6.0743E-01  | 1.7210E-01  |
| CCNA_02902 | 1.0570E-04 | 7.9771E-05 | 4.0599E-01  | 4.3604E-02  |
| CCNA_02903 | 1.0671E-04 | 7.6067E-05 | 4.8821E-01  | 9.6049E-02  |
| CCNA_02904 | 1.1873E-04 | 1.2604E-04 | -8.6167E-02 | -2.7031E-01 |
| CCNA_02905 | 5.7547E-05 | 4.1560E-05 | 4.6939E-01  | 8.4047E-02  |
| CCNA_02906 | 1.1625E-04 | 1.6333E-04 | -4.9057E-01 | -5.2825E-01 |
| CCNA_02907 | 1.9125E-05 | 0.0000E+00 | 1.1173E+01  | 6.9111E+00  |
| CCNA_02908 | 7.6353E-05 | 9.3702E-05 | -2.9542E-01 | -4.0378E-01 |
| CCNA_02909 | 6.8252E-05 | 6.4987E-05 | 7.0633E-02  | -1.7030E-01 |
| CCNA_02910 | 1.3080E-04 | 2.3140E-04 | -8.2305E-01 | -7.4032E-01 |
| CCNA_02911 | 1.1356E-04 | 5.9973E-05 | 9.2097E-01  | 3.7208E-01  |
| CCNA_02912 | 1.1859E-04 | 9.7928E-05 | 2.7618E-01  | -3.9192E-02 |
| CCNA_02913 | 5.6752E-05 | 6.7142E-05 | -2.4260E-01 | -3.7009E-01 |

|            |            |            |             |             |
|------------|------------|------------|-------------|-------------|
| CCNA_02914 | 6.5861E-05 | 3.9728E-05 | 7.2907E-01  | 2.4968E-01  |
| CCNA_02915 | 8.6277E-05 | 1.5022E-04 | -8.0003E-01 | -7.2564E-01 |
| CCNA_02916 | 1.0859E-04 | 1.4771E-04 | -4.4390E-01 | -4.9849E-01 |
| CCNA_02917 | 5.6789E-05 | 1.3782E-04 | -1.2791E+00 | -1.0312E+00 |
| CCNA_02918 | 4.5663E-05 | 4.4327E-05 | 4.2708E-02  | -1.8811E-01 |
| CCNA_02919 | 4.8290E-05 | 4.3930E-05 | 1.3639E-01  | -1.2836E-01 |
| CCNA_02920 | 4.3837E-05 | 7.2346E-06 | 2.5977E+00  | 1.4415E+00  |
| CCNA_02921 | 4.6588E-05 | 9.0337E-05 | -9.5535E-01 | -8.2471E-01 |
| CCNA_02922 | 1.1738E-04 | 5.2449E-05 | 1.1621E+00  | 5.2587E-01  |
| CCNA_02923 | 8.7437E-05 | 1.3489E-04 | -6.2545E-01 | -6.1429E-01 |
| CCNA_02924 | 2.3971E-04 | 3.1101E-04 | -3.7567E-01 | -4.5497E-01 |
| CCNA_02925 | 1.9371E-04 | 3.0690E-04 | -6.6386E-01 | -6.3879E-01 |
| CCNA_02926 | 1.0731E-04 | 1.3885E-04 | -3.7174E-01 | -4.5246E-01 |
| CCNA_02927 | 7.1623E-05 | 1.8198E-05 | 1.9761E+00  | 1.0451E+00  |
| CCNA_02928 | 2.9793E-05 | 2.5135E-05 | 2.4506E-01  | -5.9045E-02 |
| CCNA_02929 | 5.0149E-05 | 2.1389E-05 | 1.2289E+00  | 5.6851E-01  |
| CCNA_02930 | 6.0789E-05 | 5.7272E-05 | 8.5879E-02  | -1.6057E-01 |
| CCNA_02931 | 1.2022E-04 | 1.3244E-04 | -1.3971E-01 | -3.0446E-01 |
| CCNA_02932 | 9.7759E-05 | 1.4602E-05 | 2.7423E+00  | 1.5338E+00  |
| CCNA_02933 | 9.5322E-05 | 1.5212E-04 | -6.7432E-01 | -6.4546E-01 |
| CCNA_02934 | 6.6694E-05 | 1.0725E-04 | -6.8538E-01 | -6.5252E-01 |
| CCNA_02935 | 9.7412E-05 | 5.8507E-05 | 7.3536E-01  | 2.5369E-01  |
| CCNA_02936 | 1.0665E-04 | 1.1415E-04 | -9.8194E-02 | -2.7798E-01 |
| CCNA_02937 | 7.6908E-05 | 9.2301E-05 | -2.6325E-01 | -3.8326E-01 |
| CCNA_02938 | 8.8982E-05 | 1.0304E-04 | -2.1168E-01 | -3.5037E-01 |
| CCNA_02939 | 1.0872E-04 | 8.8887E-05 | 2.9053E-01  | -3.0038E-02 |
| CCNA_02940 | 7.0199E-05 | 1.3489E-04 | -9.4224E-01 | -8.1635E-01 |
| CCNA_02941 | 3.5450E-04 | 1.6704E-04 | 1.0855E+00  | 4.7704E-01  |
| CCNA_02942 | 7.7912E-05 | 1.2092E-04 | -6.3411E-01 | -6.1981E-01 |
| CCNA_02943 | 1.8664E-04 | 6.3098E-05 | 1.5644E+00  | 7.8251E-01  |
| CCNA_02944 | 2.0087E-04 | 1.4567E-04 | 4.6352E-01  | 8.0304E-02  |
| CCNA_02945 | 1.0419E-04 | 9.8898E-05 | 7.5097E-02  | -1.6745E-01 |
| CCNA_02946 | 1.0436E-04 | 9.9080E-05 | 7.4807E-02  | -1.6764E-01 |
| CCNA_02947 | 5.0075E-05 | 4.0598E-05 | 3.0250E-01  | -2.2404E-02 |
| CCNA_02948 | 4.2149E-05 | 6.5352E-05 | -6.3276E-01 | -6.1895E-01 |
| CCNA_02949 | 1.5231E-04 | 9.8052E-05 | 6.3534E-01  | 1.8990E-01  |
| CCNA_02950 | 6.6990E-05 | 7.4327E-05 | -1.5000E-01 | -3.1103E-01 |
| CCNA_02951 | 5.6673E-05 | 7.5536E-05 | -4.1455E-01 | -4.7977E-01 |
| CCNA_02952 | 1.3732E-04 | 1.1962E-04 | 1.9897E-01  | -8.8442E-02 |
| CCNA_02953 | 7.4744E-05 | 1.3490E-04 | -8.5182E-01 | -7.5868E-01 |
| CCNA_02954 | 5.4958E-05 | 1.0637E-04 | -9.5272E-01 | -8.2304E-01 |
| CCNA_02955 | 4.8475E-05 | 1.1467E-04 | -1.2421E+00 | -1.0076E+00 |
| CCNA_02956 | 5.3409E-05 | 6.6620E-05 | -3.1893E-01 | -4.1878E-01 |
| CCNA_02957 | 8.0117E-05 | 1.3421E-04 | -7.4430E-01 | -6.9009E-01 |
| CCNA_02958 | 7.1609E-05 | 1.6243E-04 | -1.1815E+00 | -9.6899E-01 |
| CCNA_02959 | 7.3690E-05 | 1.6243E-04 | -1.1402E+00 | -9.4264E-01 |
| CCNA_02960 | 1.0198E-04 | 2.9436E-05 | 1.7923E+00  | 9.2786E-01  |
| CCNA_02961 | 2.8415E-04 | 1.1543E-04 | 1.2995E+00  | 6.1355E-01  |
| CCNA_02962 | 3.5967E-04 | 1.6214E-04 | 1.1493E+00  | 5.1774E-01  |
| CCNA_02963 | 2.1952E-04 | 1.3258E-04 | 7.2739E-01  | 2.4861E-01  |
| CCNA_02964 | 2.3341E-04 | 1.3822E-04 | 7.5586E-01  | 2.6676E-01  |
| CCNA_02965 | 8.2591E-05 | 1.3070E-04 | -6.6224E-01 | -6.3776E-01 |
| CCNA_02966 | 1.4112E-04 | 1.5271E-04 | -1.1390E-01 | -2.8800E-01 |



|            |            |            |             |             |
|------------|------------|------------|-------------|-------------|
| CCNA_02967 | 1.6849E-04 | 1.2053E-04 | 4.8328E-01  | 9.2905E-02  |
| CCNA_02968 | 5.9545E-05 | 6.1482E-05 | -4.6262E-02 | -2.4486E-01 |
| CCNA_02969 | 8.5916E-05 | 2.9344E-05 | 1.5495E+00  | 7.7299E-01  |
| CCNA_02970 | 4.8072E-05 | 9.4820E-05 | -9.7998E-01 | -8.4042E-01 |
| CCNA_02971 | 7.9244E-05 | 7.6904E-05 | 4.3167E-02  | -1.8782E-01 |
| CCNA_02972 | 1.6052E-04 | 1.5340E-04 | 6.5419E-02  | -1.7362E-01 |
| CCNA_02973 | 1.3186E-04 | 1.1951E-04 | 1.4187E-01  | -1.2486E-01 |
| CCNA_02974 | 1.3040E-04 | 1.6243E-04 | -3.1681E-01 | -4.1743E-01 |
| CCNA_02975 | 9.4813E-05 | 5.7164E-05 | 7.2984E-01  | 2.5017E-01  |
| CCNA_02976 | 7.8485E-05 | 2.2201E-05 | 1.8213E+00  | 9.4638E-01  |
| CCNA_02977 | 7.8587E-05 | 3.0811E-05 | 1.3505E+00  | 6.4607E-01  |
| CCNA_02978 | 1.2333E-04 | 6.2683E-05 | 9.7629E-01  | 4.0737E-01  |
| CCNA_02979 | 7.2238E-05 | 6.9429E-05 | 5.7142E-02  | -1.7890E-01 |
| CCNA_02980 | 3.7404E-04 | 1.0744E-04 | 1.7995E+00  | 9.3246E-01  |
| CCNA_02981 | 3.8541E-04 | 4.9001E-05 | 2.9753E+00  | 1.6824E+00  |
| CCNA_02982 | 6.7614E-05 | 1.2737E-05 | 2.4074E+00  | 1.3202E+00  |
| CCNA_02983 | 7.8069E-05 | 1.6226E-04 | -1.0555E+00 | -8.8858E-01 |
| CCNA_02984 | 5.8042E-05 | 4.5852E-05 | 3.3996E-01  | 1.4879E-03  |
| CCNA_02985 | 6.0340E-05 | 1.0486E-04 | -7.9734E-01 | -7.2393E-01 |
| CCNA_02986 | 1.6331E-04 | 2.2491E-05 | 2.8597E+00  | 1.6087E+00  |
| CCNA_02987 | 2.5542E-04 | 1.4861E-04 | 7.8128E-01  | 2.8298E-01  |
| CCNA_02988 | 1.2979E-04 | 6.6296E-08 | 1.0765E+01  | 6.6511E+00  |
| CCNA_02989 | 5.4592E-05 | 1.1521E-04 | -1.0774E+00 | -9.0258E-01 |
| CCNA_02990 | 0.0000E+00 | 0.0000E+00 | -8.4168E-01 | -7.5221E-01 |
| CCNA_02991 | 0.0000E+00 | 0.0000E+00 | -8.4168E-01 | -7.5221E-01 |
| CCNA_02992 | 6.3443E-05 | 9.5931E-05 | -5.9656E-01 | -5.9586E-01 |
| CCNA_02993 | 4.3860E-05 | 2.8665E-05 | 6.1335E-01  | 1.7587E-01  |
| CCNA_02994 | 2.6332E-04 | 1.7553E-04 | 5.8508E-01  | 1.5783E-01  |
| CCNA_02995 | 1.1055E-04 | 1.2630E-04 | -1.9218E-01 | -3.3793E-01 |
| CCNA_02996 | 7.9521E-05 | 3.2651E-06 | 4.6026E+00  | 2.7204E+00  |
| CCNA_02997 | 2.7656E-04 | 1.3895E-04 | 9.9297E-01  | 4.1801E-01  |
| CCNA_02998 | 6.1603E-05 | 3.4822E-05 | 8.2275E-01  | 3.0943E-01  |
| CCNA_02999 | 6.3716E-05 | 1.4935E-04 | -1.2289E+00 | -9.9922E-01 |
| CCNA_03000 | 8.8959E-05 | 9.5583E-05 | -1.0366E-01 | -2.8147E-01 |
| CCNA_03001 | 7.5766E-05 | 1.2016E-04 | -6.6537E-01 | -6.3975E-01 |
| CCNA_03002 | 2.5758E-04 | 1.6084E-04 | 6.7930E-01  | 2.1794E-01  |
| CCNA_03003 | 2.5192E-04 | 1.6243E-04 | 6.3312E-01  | 1.8848E-01  |
| CCNA_03004 | 5.6863E-05 | 8.0069E-05 | -4.9380E-01 | -5.3032E-01 |
| CCNA_03005 | 7.2072E-05 | 7.8337E-05 | -1.2033E-01 | -2.9211E-01 |
| CCNA_03006 | 3.8101E-04 | 4.5546E-04 | -2.5750E-01 | -3.7959E-01 |
| CCNA_03007 | 7.1762E-05 | 3.2245E-05 | 1.1539E+00  | 5.2063E-01  |
| CCNA_03008 | 8.7192E-05 | 2.9295E-05 | 1.5732E+00  | 7.8812E-01  |
| CCNA_03009 | 7.2770E-05 | 8.3848E-05 | -2.0449E-01 | -3.4579E-01 |
| CCNA_03010 | 5.5189E-05 | 7.8495E-05 | -5.0825E-01 | -5.3954E-01 |
| CCNA_03011 | 1.9173E-04 | 3.1930E-04 | -7.3584E-01 | -6.8470E-01 |
| CCNA_03012 | 1.7941E-04 | 3.2455E-04 | -8.5523E-01 | -7.6085E-01 |
| CCNA_03013 | 6.6125E-05 | 7.9663E-05 | -2.6877E-01 | -3.8679E-01 |
| CCNA_03014 | 7.0675E-05 | 7.9274E-05 | -1.6570E-01 | -3.2104E-01 |
| CCNA_03015 | 5.6132E-05 | 3.4980E-05 | 6.8209E-01  | 2.1971E-01  |
| CCNA_03016 | 9.6505E-05 | 8.3848E-05 | 2.0275E-01  | -8.6027E-02 |
| CCNA_03017 | 3.0260E-05 | 8.8671E-07 | 5.0796E+00  | 3.0246E+00  |
| CCNA_03018 | 1.5468E-05 | 5.4695E-07 | 4.8005E+00  | 2.8466E+00  |
| CCNA_03019 | 8.2143E-05 | 1.0278E-04 | -3.2333E-01 | -4.2159E-01 |

|            |            |            |             |             |
|------------|------------|------------|-------------|-------------|
| CCNA_03020 | 9.0869E-05 | 5.1952E-05 | 8.0646E-01  | 2.9904E-01  |
| CCNA_03021 | 7.3588E-05 | 1.4094E-04 | -9.3751E-01 | -8.1333E-01 |
| CCNA_03022 | 6.3785E-05 | 4.0366E-05 | 6.5988E-01  | 2.0555E-01  |
| CCNA_03023 | 4.3078E-05 | 8.5920E-05 | -9.9602E-01 | -8.5065E-01 |
| CCNA_03024 | 1.0153E-04 | 8.9102E-05 | 1.8833E-01  | -9.5228E-02 |
| CCNA_03025 | 1.3041E-04 | 1.6227E-04 | -3.1536E-01 | -4.1650E-01 |
| CCNA_03026 | 6.0405E-05 | 1.4403E-04 | -1.2536E+00 | -1.0149E+00 |
| CCNA_03027 | 4.1580E-05 | 1.1850E-04 | -1.5109E+00 | -1.1791E+00 |
| CCNA_03028 | 4.8988E-05 | 4.4684E-05 | 1.3254E-01  | -1.3081E-01 |
| CCNA_03029 | 4.6538E-04 | 2.8884E-04 | 6.8812E-01  | 2.2356E-01  |
| CCNA_03030 | 4.6956E-04 | 2.9753E-04 | 6.5824E-01  | 2.0450E-01  |
| CCNA_03031 | 5.8773E-05 | 1.5631E-04 | -1.4112E+00 | -1.1154E+00 |
| CCNA_03032 | 1.2182E-04 | 1.6279E-04 | -4.1831E-01 | -4.8217E-01 |
| CCNA_03033 | 1.0787E-04 | 1.0969E-04 | -2.4131E-02 | -2.3074E-01 |
| CCNA_03034 | 7.4999E-05 | 5.3866E-05 | 4.7736E-01  | 8.9129E-02  |
| CCNA_03035 | 8.4191E-05 | 9.7456E-05 | -2.1112E-01 | -3.5001E-01 |
| CCNA_03036 | 7.2067E-05 | 7.9489E-05 | -1.4148E-01 | -3.0560E-01 |
| CCNA_03037 | 8.3401E-05 | 1.1957E-04 | -5.1979E-01 | -5.4690E-01 |
| CCNA_03038 | 7.3089E-05 | 1.6257E-04 | -1.1533E+00 | -9.5097E-01 |
| CCNA_03039 | 1.1873E-04 | 1.5870E-04 | -4.1857E-01 | -4.8233E-01 |
| CCNA_03040 | 8.5565E-05 | 4.9921E-05 | 7.7720E-01  | 2.8038E-01  |
| CCNA_03041 | 2.2664E-04 | 1.6243E-04 | 4.8059E-01  | 9.1187E-02  |
| CCNA_03042 | 8.3008E-05 | 1.1159E-04 | -4.2696E-01 | -4.8769E-01 |
| CCNA_03043 | 1.4423E-04 | 7.9821E-05 | 8.5339E-01  | 3.2898E-01  |
| CCNA_03044 | 1.4970E-04 | 1.4705E-04 | 2.5743E-02  | -1.9893E-01 |
| CCNA_03045 | 1.0218E-04 | 1.4895E-04 | -5.4376E-01 | -5.6218E-01 |
| CCNA_03046 | 6.5126E-05 | 1.3342E-04 | -1.0347E+00 | -8.7531E-01 |
| CCNA_03047 | 4.9945E-05 | 9.8682E-05 | -9.8243E-01 | -8.4199E-01 |
| CCNA_03048 | 4.0637E-05 | 5.1380E-07 | 6.2825E+00  | 3.7919E+00  |
| CCNA_03049 | 3.8713E-05 | 1.6640E-05 | 1.2176E+00  | 5.6128E-01  |
| CCNA_03050 | 6.3420E-05 | 2.7853E-05 | 1.1868E+00  | 5.4163E-01  |
| CCNA_03051 | 4.0544E-05 | 1.0267E-04 | -1.3404E+00 | -1.0703E+00 |
| CCNA_03052 | 1.2923E-04 | 1.6181E-04 | -3.2435E-01 | -4.2224E-01 |
| CCNA_03053 | 1.4868E-04 | 1.6243E-04 | -1.2761E-01 | -2.9675E-01 |
| CCNA_03055 | 6.6241E-05 | 6.5302E-05 | 2.0506E-02  | -2.0227E-01 |
| CCNA_03054 | 7.7158E-05 | 1.3516E-04 | -8.0880E-01 | -7.3124E-01 |
| CCNA_03056 | 6.3073E-05 | 1.0549E-04 | -7.4208E-01 | -6.8868E-01 |
| CCNA_03057 | 7.3325E-05 | 1.0230E-04 | -4.8051E-01 | -5.2184E-01 |
| CCNA_03058 | 7.0615E-05 | 1.6167E-04 | -1.1950E+00 | -9.7758E-01 |
| CCNA_03059 | 1.7195E-04 | 1.5704E-04 | 1.3081E-01  | -1.3192E-01 |
| CCNA_03060 | 1.6268E-04 | 1.1844E-04 | 4.5785E-01  | 7.6684E-02  |
| CCNA_03061 | 1.5992E-04 | 8.7735E-05 | 8.6599E-01  | 3.3702E-01  |
| CCNA_03062 | 9.8435E-04 | 2.5735E-04 | 1.9354E+00  | 1.0191E+00  |
| CCNA_03063 | 8.7336E-05 | 6.5285E-05 | 4.1971E-01  | 5.2354E-02  |
| CCNA_03064 | 2.8951E-04 | 1.5538E-04 | 8.9775E-01  | 3.5727E-01  |
| CCNA_03065 | 2.7448E-04 | 1.4087E-04 | 9.6228E-01  | 3.9843E-01  |
| CCNA_03066 | 7.6113E-05 | 1.5368E-04 | -1.0137E+00 | -8.6191E-01 |
| CCNA_03067 | 5.5069E-05 | 1.0217E-04 | -8.9168E-01 | -7.8410E-01 |
| CCNA_03068 | 6.5251E-05 | 1.8323E-05 | 1.8318E+00  | 9.5306E-01  |
| CCNA_03069 | 5.2710E-05 | 5.1860E-05 | 2.3350E-02  | -2.0046E-01 |
| CCNA_03070 | 6.2814E-05 | 1.2116E-04 | -9.4781E-01 | -8.1990E-01 |
| CCNA_03071 | 1.0362E-04 | 2.5275E-05 | 2.0350E+00  | 1.0827E+00  |
| CCNA_03072 | 1.1110E-04 | 8.4031E-05 | 4.0284E-01  | 4.1595E-02  |

|            |            |            |             |             |
|------------|------------|------------|-------------|-------------|
| CCNA_03073 | 5.9244E-05 | 6.9711E-05 | -2.3476E-01 | -3.6509E-01 |
| CCNA_03074 | 4.8068E-05 | 5.5043E-05 | -1.9556E-01 | -3.4009E-01 |
| CCNA_03075 | 5.0121E-05 | 1.2228E-04 | -1.2867E+00 | -1.0361E+00 |
| CCNA_03076 | 7.7149E-05 | 1.5759E-04 | -1.0305E+00 | -8.7264E-01 |
| CCNA_03077 | 4.6708E-05 | 8.7768E-05 | -9.1001E-01 | -7.9580E-01 |
| CCNA_03078 | 7.4139E-05 | 3.8178E-05 | 9.5724E-01  | 3.9522E-01  |
| CCNA_03079 | 1.1184E-04 | 9.3014E-05 | 2.6584E-01  | -4.5790E-02 |
| CCNA_03080 | 7.0194E-05 | 1.6071E-04 | -1.1950E+00 | -9.7759E-01 |
| CCNA_03081 | 7.6654E-05 | 9.9030E-05 | -3.6954E-01 | -4.5106E-01 |
| CCNA_03082 | 1.8178E-04 | 1.0303E-04 | 8.1904E-01  | 3.0706E-01  |
| CCNA_03083 | 7.7079E-05 | 1.2532E-04 | -7.0117E-01 | -6.6259E-01 |
| CCNA_03084 | 5.8879E-05 | 1.3069E-04 | -1.1503E+00 | -9.4904E-01 |
| CCNA_03085 | 8.3211E-05 | 6.2377E-05 | 4.1566E-01  | 4.9773E-02  |
| CCNA_03086 | 2.3343E-04 | 1.3473E-04 | 7.9282E-01  | 2.9034E-01  |
| CCNA_03087 | 2.1740E-04 | 1.4549E-04 | 5.7943E-01  | 1.5423E-01  |
| CCNA_03088 | 8.2873E-05 | 6.5161E-05 | 3.4680E-01  | 5.8503E-03  |
| CCNA_03089 | 8.2485E-05 | 1.0888E-04 | -4.0061E-01 | -4.7088E-01 |
| CCNA_03090 | 7.4780E-04 | 1.7683E-04 | 2.0802E+00  | 1.1115E+00  |
| CCNA_03091 | 8.8881E-04 | 2.6641E-04 | 1.7382E+00  | 8.9333E-01  |
| CCNA_03092 | 1.3249E-03 | 4.6271E-04 | 1.5177E+00  | 7.5268E-01  |
| CCNA_03093 | 6.7928E-05 | 6.9255E-05 | -2.7977E-02 | -2.3320E-01 |
| CCNA_03094 | 8.4487E-05 | 8.2133E-05 | 4.0707E-02  | -1.8939E-01 |
| CCNA_03095 | 7.2178E-05 | 1.4048E-04 | -9.6075E-01 | -8.2816E-01 |
| CCNA_03096 | 8.7548E-05 | 8.4089E-05 | 5.8104E-02  | -1.7829E-01 |
| CCNA_03097 | 7.6760E-05 | 1.4443E-04 | -9.1198E-01 | -7.9705E-01 |
| CCNA_03098 | 7.6589E-05 | 1.4910E-04 | -9.6106E-01 | -8.2836E-01 |
| CCNA_03099 | 1.1267E-04 | 1.4947E-04 | -4.0785E-01 | -4.7550E-01 |
| CCNA_03100 | 1.2199E-04 | 4.5098E-05 | 1.4355E+00  | 7.0024E-01  |
| CCNA_03101 | 3.9758E-05 | 1.0553E-04 | -1.4082E+00 | -1.1136E+00 |
| CCNA_03102 | 7.5637E-05 | 9.1274E-05 | -2.7115E-01 | -3.8830E-01 |
| CCNA_03103 | 8.1352E-05 | 6.6230E-05 | 2.9659E-01  | -2.6171E-02 |
| CCNA_03104 | 6.3286E-05 | 6.9669E-05 | -1.3871E-01 | -3.0383E-01 |
| CCNA_03105 | 3.3500E-04 | 2.3023E-04 | 5.4106E-01  | 1.2976E-01  |
| CCNA_03106 | 2.2466E-04 | 2.2982E-04 | -3.2772E-02 | -2.3626E-01 |
| CCNA_03107 | 3.7866E-04 | 8.8522E-05 | 2.0967E+00  | 1.1220E+00  |
| CCNA_03108 | 2.2570E-04 | 1.5171E-04 | 5.7302E-01  | 1.5015E-01  |
| CCNA_03109 | 2.2404E-04 | 1.4788E-04 | 5.9925E-01  | 1.6687E-01  |
| CCNA_03110 | 1.9961E-04 | 1.6243E-04 | 2.9739E-01  | -2.5665E-02 |
| CCNA_03111 | 1.5561E-04 | 1.5774E-04 | -1.9642E-02 | -2.2788E-01 |
| CCNA_03112 | 1.2692E-04 | 1.4127E-04 | -1.5458E-01 | -3.1395E-01 |
| CCNA_03113 | 1.3942E-04 | 1.6243E-04 | -2.2035E-01 | -3.5590E-01 |
| CCNA_03114 | 9.4235E-05 | 7.8238E-05 | 2.6831E-01  | -4.4212E-02 |
| CCNA_03115 | 1.4603E-04 | 1.6243E-04 | -1.5355E-01 | -3.1329E-01 |
| CCNA_03116 | 5.4578E-05 | 2.5002E-05 | 1.1259E+00  | 5.0281E-01  |
| CCNA_03117 | 3.5564E-05 | 6.3587E-05 | -8.3830E-01 | -7.5005E-01 |
| CCNA_03118 | 8.0210E-05 | 2.4936E-05 | 1.6852E+00  | 8.5952E-01  |
| CCNA_03119 | 1.3943E-04 | 1.4417E-04 | -4.8252E-02 | -2.4613E-01 |
| CCNA_03120 | 1.2857E-04 | 1.3579E-04 | -7.8835E-02 | -2.6564E-01 |
| CCNA_03121 | 5.2179E-05 | 1.6005E-04 | -1.6169E+00 | -1.2467E+00 |
| CCNA_03122 | 8.1357E-05 | 1.6171E-04 | -9.9110E-01 | -8.4752E-01 |
| CCNA_03123 | 7.3764E-05 | 1.6243E-04 | -1.1388E+00 | -9.4171E-01 |
| CCNA_03124 | 1.0186E-04 | 1.0966E-04 | -1.0659E-01 | -2.8334E-01 |
| CCNA_03125 | 6.7276E-05 | 7.8603E-05 | -2.2453E-01 | -3.5857E-01 |

|            |            |            |             |             |
|------------|------------|------------|-------------|-------------|
| CCNA_03126 | 6.7309E-05 | 7.1128E-05 | -7.9689E-02 | -2.6618E-01 |
| CCNA_03127 | 9.8938E-05 | 4.8454E-05 | 1.0297E+00  | 4.4144E-01  |
| CCNA_03128 | 4.6144E-05 | 1.0220E-04 | -1.1472E+00 | -9.4709E-01 |
| CCNA_03129 | 2.4958E-04 | 1.2508E-04 | 9.9654E-01  | 4.2028E-01  |
| CCNA_03130 | 5.0012E-04 | 2.7219E-04 | 8.7763E-01  | 3.4444E-01  |
| CCNA_03131 | 7.1031E-05 | 1.5258E-04 | -1.1030E+00 | -9.1892E-01 |
| CCNA_03132 | 1.0085E-04 | 5.3559E-05 | 9.1281E-01  | 3.6688E-01  |
| CCNA_03133 | 8.4427E-05 | 1.6243E-04 | -9.4400E-01 | -8.1747E-01 |
| CCNA_03134 | 8.2147E-05 | 1.6243E-04 | -9.8349E-01 | -8.4266E-01 |
| CCNA_03135 | 1.0802E-04 | 1.6280E-04 | -5.9181E-01 | -5.9283E-01 |
| CCNA_03136 | 7.7685E-05 | 6.5899E-05 | 2.3730E-01  | -6.3994E-02 |
| CCNA_03137 | 6.0086E-05 | 8.7279E-05 | -5.3864E-01 | -5.5892E-01 |
| CCNA_03138 | 1.7594E-04 | 2.4098E-04 | -4.5381E-01 | -5.0481E-01 |
| CCNA_03139 | 5.5036E-05 | 0.0000E+00 | 1.2697E+01  | 7.8836E+00  |
| CCNA_03140 | 6.2093E-05 | 3.6579E-05 | 7.6319E-01  | 2.7144E-01  |
| CCNA_03141 | 6.9907E-05 | 3.0215E-05 | 1.2099E+00  | 5.5637E-01  |
| CCNA_03142 | 2.3556E-04 | 1.4022E-04 | 7.4839E-01  | 2.6200E-01  |
| CCNA_03143 | 1.3604E-04 | 8.8680E-05 | 6.1729E-01  | 1.7838E-01  |
| CCNA_03144 | 1.9616E-04 | 1.6417E-04 | 2.5683E-01  | -5.1534E-02 |
| CCNA_03145 | 2.0496E-04 | 2.0215E-04 | 1.9915E-02  | -2.0265E-01 |
| CCNA_03146 | 1.2832E-04 | 1.5633E-04 | -2.8485E-01 | -3.9704E-01 |
| CCNA_03147 | 1.3212E-04 | 1.3203E-04 | 9.5491E-04  | -2.1474E-01 |
| CCNA_03148 | 1.0626E-04 | 1.0176E-04 | 6.2271E-02  | -1.7563E-01 |
| CCNA_03149 | 1.0203E-04 | 1.2687E-04 | -3.1449E-01 | -4.1595E-01 |
| CCNA_03150 | 4.5876E-05 | 1.0505E-04 | -1.1953E+00 | -9.7777E-01 |
| CCNA_03151 | 4.7004E-05 | 5.1073E-05 | -1.1987E-01 | -2.9181E-01 |
| CCNA_03152 | 7.3547E-05 | 4.6399E-05 | 6.6439E-01  | 2.0843E-01  |
| CCNA_03153 | 5.0898E-05 | 1.2211E-04 | -1.2625E+00 | -1.0206E+00 |
| CCNA_03154 | 8.8598E-05 | 1.4638E-04 | -7.2440E-01 | -6.7740E-01 |
| CCNA_03155 | 9.1262E-05 | 9.8972E-05 | -1.1706E-01 | -2.9002E-01 |
| CCNA_03156 | 5.7233E-05 | 1.7162E-05 | 1.7370E+00  | 8.9258E-01  |
| CCNA_03157 | 5.9864E-05 | 9.4796E-05 | -6.6315E-01 | -6.3834E-01 |
| CCNA_03158 | 3.6433E-05 | 7.9058E-06 | 2.2029E+00  | 1.1898E+00  |
| CCNA_03159 | 6.0756E-05 | 7.2727E-05 | -2.5951E-01 | -3.8088E-01 |
| CCNA_03160 | 2.1549E-04 | 3.3273E-04 | -6.2673E-01 | -6.1511E-01 |
| CCNA_03161 | 1.9896E-04 | 3.1482E-04 | -6.6206E-01 | -6.3764E-01 |
| CCNA_03162 | 5.4810E-05 | 1.4634E-04 | -1.4168E+00 | -1.1190E+00 |
| CCNA_03163 | 1.4149E-04 | 1.9031E-04 | -4.2765E-01 | -4.8812E-01 |
| CCNA_03164 | 1.2927E-04 | 1.6243E-04 | -3.2945E-01 | -4.2549E-01 |
| CCNA_03165 | 5.1957E-05 | 1.4389E-04 | -1.4695E+00 | -1.1527E+00 |
| CCNA_03166 | 5.2918E-05 | 1.0316E-04 | -9.6299E-01 | -8.2959E-01 |
| CCNA_03167 | 9.3051E-05 | 2.9842E-05 | 1.6404E+00  | 8.3094E-01  |
| CCNA_03168 | 5.6497E-05 | 1.5616E-04 | -1.4667E+00 | -1.1509E+00 |
| CCNA_03169 | 5.4861E-05 | 9.9088E-05 | -8.5294E-01 | -7.5939E-01 |
| CCNA_03170 | 7.8014E-05 | 1.2454E-04 | -6.7480E-01 | -6.4577E-01 |
| CCNA_03171 | 1.7833E-04 | 1.1031E-04 | 6.9292E-01  | 2.2662E-01  |
| CCNA_03172 | 6.8280E-05 | 1.6116E-04 | -1.2389E+00 | -1.0056E+00 |
| CCNA_03173 | 6.7128E-05 | 1.6293E-04 | -1.2792E+00 | -1.0313E+00 |
| CCNA_03174 | 6.5288E-05 | 1.2494E-04 | -9.3638E-01 | -8.1262E-01 |
| CCNA_03175 | 1.1679E-04 | 9.7157E-05 | 2.6547E-01  | -4.6022E-02 |
| CCNA_03176 | 1.2017E-04 | 1.6243E-04 | -4.3476E-01 | -4.9266E-01 |
| CCNA_03177 | 9.3745E-05 | 1.2733E-04 | -4.4179E-01 | -4.9714E-01 |
| CCNA_03178 | 9.0600E-05 | 1.4676E-04 | -6.9591E-01 | -6.5923E-01 |

|            |            |            |             |             |
|------------|------------|------------|-------------|-------------|
| CCNA_03179 | 8.8570E-05 | 1.6243E-04 | -8.7489E-01 | -7.7339E-01 |
| CCNA_03180 | 1.1536E-04 | 1.4807E-04 | -3.6021E-01 | -4.4511E-01 |
| CCNA_03181 | 1.0065E-04 | 1.2343E-04 | -2.9430E-01 | -4.0307E-01 |
| CCNA_03182 | 8.2055E-05 | 2.4082E-05 | 1.7682E+00  | 9.1249E-01  |
| CCNA_03183 | 5.2086E-05 | 2.1463E-06 | 4.5955E+00  | 2.7159E+00  |
| CCNA_03184 | 1.4789E-04 | 8.3948E-05 | 8.1685E-01  | 3.0567E-01  |
| CCNA_03185 | 1.5333E-04 | 1.6243E-04 | -8.3206E-02 | -2.6842E-01 |
| CCNA_03186 | 9.4466E-05 | 1.6273E-04 | -7.8464E-01 | -7.1583E-01 |
| CCNA_03187 | 9.1396E-05 | 1.0373E-04 | -1.8266E-01 | -3.3186E-01 |
| CCNA_03188 | 5.7691E-05 | 3.3521E-05 | 7.8302E-01  | 2.8409E-01  |
| CCNA_03189 | 5.5166E-05 | 1.3123E-04 | -1.2502E+00 | -1.0128E+00 |
| CCNA_03190 | 7.0596E-05 | 6.2716E-05 | 1.7066E-01  | -1.0650E-01 |
| CCNA_03191 | 1.2587E-04 | 1.1367E-04 | 1.4713E-01  | -1.2151E-01 |
| CCNA_03192 | 7.5655E-05 | 1.5179E-04 | -1.0046E+00 | -8.5612E-01 |
| CCNA_03193 | 8.0108E-05 | 1.0192E-04 | -3.4748E-01 | -4.3699E-01 |
| CCNA_03194 | 1.0845E-04 | 7.4144E-05 | 5.4852E-01  | 1.3452E-01  |
| CCNA_03195 | 1.0560E-04 | 7.6755E-05 | 4.6014E-01  | 7.8146E-02  |
| CCNA_03196 | 6.5658E-05 | 6.8691E-05 | -6.5233E-02 | -2.5696E-01 |
| CCNA_03197 | 4.9510E-05 | 1.3127E-05 | 1.9145E+00  | 1.0058E+00  |
| CCNA_03198 | 2.1562E-04 | 8.4437E-05 | 1.3524E+00  | 6.4728E-01  |
| CCNA_03199 | 9.4549E-05 | 1.7867E-05 | 2.4032E+00  | 1.3175E+00  |
| CCNA_03200 | 8.3285E-05 | 9.8318E-05 | -2.3943E-01 | -3.6807E-01 |
| CCNA_03201 | 2.1575E-04 | 2.2578E-04 | -6.5600E-02 | -2.5719E-01 |
| CCNA_03202 | 2.1494E-04 | 1.5764E-04 | 4.4731E-01  | 6.9961E-02  |
| CCNA_03203 | 1.9870E-04 | 1.6243E-04 | 2.9079E-01  | -2.9873E-02 |
| CCNA_03204 | 6.3295E-05 | 1.4839E-04 | -1.2292E+00 | -9.9938E-01 |
| CCNA_03205 | 9.0554E-05 | 1.6243E-04 | -8.4293E-01 | -7.5301E-01 |
| CCNA_03206 | 3.8371E-05 | 1.0525E-04 | -1.4557E+00 | -1.1439E+00 |
| CCNA_03207 | 5.9808E-05 | 8.7171E-05 | -5.4353E-01 | -5.6204E-01 |
| CCNA_03208 | 5.2290E-05 | 9.3329E-05 | -8.3580E-01 | -7.4846E-01 |
| CCNA_03209 | 7.0185E-05 | 1.4829E-04 | -1.0792E+00 | -9.0368E-01 |
| CCNA_03210 | 5.9915E-05 | 9.4365E-05 | -6.5535E-01 | -6.3336E-01 |
| CCNA_03211 | 1.5295E-04 | 1.3285E-04 | 2.0319E-01  | -8.5746E-02 |
| CCNA_03212 | 1.2254E-04 | 1.2066E-04 | 2.2258E-02  | -2.0115E-01 |
| CCNA_03213 | 1.3433E-04 | 1.5869E-04 | -2.4049E-01 | -3.6874E-01 |
| CCNA_03214 | 8.5778E-04 | 2.4979E-04 | 1.7799E+00  | 9.1992E-01  |
| CCNA_03215 | 7.0350E-04 | 2.6067E-04 | 1.4323E+00  | 6.9822E-01  |
| CCNA_03216 | 1.7166E-04 | 1.6080E-04 | 9.4244E-02  | -1.5524E-01 |
| CCNA_03217 | 9.4744E-05 | 2.6726E-05 | 1.8254E+00  | 9.4898E-01  |
| CCNA_03218 | 1.0149E-04 | 8.6310E-05 | 2.3367E-01  | -6.6304E-02 |
| CCNA_03219 | 7.6793E-05 | 9.9047E-05 | -3.6717E-01 | -4.4955E-01 |
| CCNA_03220 | 4.8932E-05 | 6.5385E-05 | -4.1821E-01 | -4.8210E-01 |
| CCNA_03221 | 5.2757E-05 | 2.4248E-05 | 1.1211E+00  | 4.9975E-01  |
| CCNA_03222 | 7.4370E-05 | 1.4183E-04 | -9.3140E-01 | -8.0944E-01 |
| CCNA_03223 | 4.8803E-05 | 9.4365E-05 | -9.5127E-01 | -8.2211E-01 |
| CCNA_03224 | 1.8531E-04 | 1.0361E-04 | 8.3867E-01  | 3.1959E-01  |
| CCNA_03225 | 8.1338E-05 | 7.2081E-05 | 1.7424E-01  | -1.0422E-01 |
| CCNA_03226 | 6.7651E-05 | 1.0374E-04 | -6.1677E-01 | -6.0875E-01 |
| CCNA_03227 | 2.1794E-04 | 7.9813E-05 | 1.4491E+00  | 7.0896E-01  |
| CCNA_03228 | 8.5912E-05 | 1.6269E-04 | -9.2121E-01 | -8.0294E-01 |
| CCNA_03229 | 5.6817E-05 | 1.0521E-04 | -8.8892E-01 | -7.8234E-01 |
| CCNA_03230 | 1.1112E-04 | 1.2781E-04 | -2.0196E-01 | -3.4417E-01 |
| CCNA_03231 | 9.7287E-05 | 1.6243E-04 | -7.3947E-01 | -6.8702E-01 |

|            |            |            |             |             |
|------------|------------|------------|-------------|-------------|
| CCNA_03232 | 1.1643E-04 | 1.1057E-04 | 7.4458E-02  | -1.6786E-01 |
| CCNA_03233 | 6.0433E-05 | 2.6162E-05 | 1.2075E+00  | 5.5484E-01  |
| CCNA_03234 | 6.3924E-05 | 6.3429E-05 | 1.1126E-02  | -2.0826E-01 |
| CCNA_03235 | 6.5672E-05 | 6.6421E-05 | -1.6438E-02 | -2.2584E-01 |
| CCNA_03236 | 4.9769E-05 | 8.9533E-05 | -8.4716E-01 | -7.5571E-01 |
| CCNA_03237 | 5.7436E-05 | 1.5698E-04 | -1.4505E+00 | -1.1406E+00 |
| CCNA_03238 | 3.7478E-05 | 4.6739E-06 | 3.0010E+00  | 1.6988E+00  |
| CCNA_03239 | 7.3477E-05 | 1.1714E-04 | -6.7284E-01 | -6.4452E-01 |
| CCNA_03240 | 8.4524E-05 | 5.4603E-05 | 6.3024E-01  | 1.8664E-01  |
| CCNA_03241 | 5.3492E-05 | 1.0479E-04 | -9.7010E-01 | -8.3412E-01 |
| CCNA_03242 | 7.5480E-05 | 7.6804E-05 | -2.5171E-02 | -2.3141E-01 |
| CCNA_03243 | 7.5678E-05 | 1.3166E-04 | -7.9892E-01 | -7.2493E-01 |
| CCNA_03244 | 9.9058E-05 | 1.2104E-04 | -2.8918E-01 | -3.9980E-01 |
| CCNA_03245 | 9.2052E-05 | 1.6233E-04 | -8.1838E-01 | -7.3735E-01 |
| CCNA_03246 | 1.9625E-04 | 7.3175E-05 | 1.4232E+00  | 6.9240E-01  |
| CCNA_03247 | 1.9880E-04 | 4.3764E-05 | 2.1833E+00  | 1.1772E+00  |
| CCNA_03248 | 4.8424E-05 | 5.8341E-06 | 3.0512E+00  | 1.7308E+00  |
| CCNA_03249 | 7.1202E-05 | 4.9656E-05 | 5.1981E-01  | 1.1620E-01  |
| CCNA_03250 | 6.4724E-05 | 2.4447E-05 | 1.4043E+00  | 6.8035E-01  |
| CCNA_04004 | 6.2523E-05 | 7.2603E-05 | -2.1570E-01 | -3.5294E-01 |
| CCNA_03252 | 6.1653E-05 | 3.8709E-05 | 6.7132E-01  | 2.1284E-01  |
| CCNA_03253 | 6.7193E-05 | 1.3293E-04 | -9.8430E-01 | -8.4318E-01 |
| CCNA_03254 | 7.1554E-05 | 5.3833E-05 | 4.1041E-01  | 4.6428E-02  |
| CCNA_03255 | 1.1710E-04 | 6.2965E-05 | 8.9494E-01  | 3.5548E-01  |
| CCNA_03256 | 1.2408E-04 | 1.1047E-04 | 1.6760E-01  | -1.0845E-01 |
| CCNA_03257 | 1.5465E-04 | 1.7949E-04 | -2.1492E-01 | -3.5244E-01 |
| CCNA_03258 | 8.3609E-05 | 1.6235E-04 | -9.5739E-01 | -8.2602E-01 |
| CCNA_03259 | 1.1448E-04 | 9.1812E-05 | 3.1826E-01  | -1.2354E-02 |
| CCNA_03260 | 2.8606E-04 | 1.6243E-04 | 8.1649E-01  | 3.0544E-01  |
| CCNA_03261 | 7.9595E-05 | 5.1769E-05 | 6.2044E-01  | 1.8039E-01  |
| CCNA_03262 | 1.7608E-04 | 5.1297E-05 | 1.7791E+00  | 9.1941E-01  |
| CCNA_03263 | 1.3910E-04 | 1.4105E-04 | -2.0095E-02 | -2.2817E-01 |
| CCNA_03264 | 1.2621E-04 | 8.8240E-05 | 5.1619E-01  | 1.1389E-01  |
| CCNA_03265 | 1.0975E-04 | 1.6165E-04 | -5.5866E-01 | -5.7169E-01 |
| CCNA_03266 | 1.9516E-04 | 1.0277E-04 | 9.2516E-01  | 3.7476E-01  |
| CCNA_03267 | 2.0510E-04 | 1.5173E-04 | 4.3482E-01  | 6.1993E-02  |
| CCNA_03268 | 8.6499E-05 | 1.6241E-04 | -9.0888E-01 | -7.9507E-01 |
| CCNA_03269 | 9.3176E-05 | 9.3113E-05 | 9.1483E-04  | -2.1477E-01 |
| CCNA_03271 | 9.2515E-05 | 8.6500E-05 | 9.6914E-02  | -1.5354E-01 |
| CCNA_03270 | 7.6580E-05 | 1.6047E-04 | -1.0673E+00 | -8.9609E-01 |
| CCNA_03272 | 1.2433E-04 | 1.5356E-04 | -3.0460E-01 | -4.0964E-01 |
| CCNA_03274 | 8.1722E-05 | 1.0376E-04 | -3.4452E-01 | -4.3510E-01 |
| CCNA_03275 | 6.7928E-05 | 5.5391E-05 | 2.9425E-01  | -2.7664E-02 |
| CCNA_03276 | 8.9824E-05 | 1.6243E-04 | -8.5462E-01 | -7.6046E-01 |
| CCNA_03277 | 6.8381E-05 | 1.2930E-04 | -9.1907E-01 | -8.0157E-01 |
| CCNA_03278 | 1.1759E-04 | 1.0051E-04 | 2.2645E-01  | -7.0914E-02 |
| CCNA_03279 | 1.4432E-04 | 1.3011E-04 | 1.4956E-01  | -1.1995E-01 |
| CCNA_03280 | 4.3665E-04 | 1.6338E-04 | 1.4182E+00  | 6.8924E-01  |
| CCNA_03281 | 2.4058E-04 | 1.2543E-04 | 9.3953E-01  | 3.8392E-01  |
| CCNA_03282 | 4.8641E-05 | 2.0842E-05 | 1.2223E+00  | 5.6425E-01  |
| CCNA_03283 | 6.6610E-05 | 9.6884E-05 | -5.4053E-01 | -5.6013E-01 |
| CCNA_03284 | 7.0416E-05 | 5.8714E-05 | 2.6210E-01  | -4.8174E-02 |
| CCNA_03285 | 6.8442E-05 | 1.1090E-04 | -6.9629E-01 | -6.5947E-01 |

|            |            |            |             |             |
|------------|------------|------------|-------------|-------------|
| CCNA_03286 | 8.7715E-05 | 1.0676E-04 | -2.8354E-01 | -3.9621E-01 |
| CCNA_03287 | 1.1487E-04 | 5.4769E-05 | 1.0684E+00  | 4.6614E-01  |
| CCNA_03288 | 9.5719E-05 | 9.2707E-05 | 4.6069E-02  | -1.8597E-01 |
| CCNA_03289 | 1.1492E-04 | 6.9595E-05 | 7.2351E-01  | 2.4613E-01  |
| CCNA_03290 | 7.1965E-05 | 1.0026E-04 | -4.7835E-01 | -5.2047E-01 |
| CCNA_03291 | 3.7140E-04 | 1.6243E-04 | 1.1931E+00  | 5.4567E-01  |
| CCNA_03292 | 4.7106E-05 | 7.1451E-05 | -6.0107E-01 | -5.9874E-01 |
| CCNA_03293 | 7.0328E-05 | 1.5179E-04 | -1.1099E+00 | -9.2331E-01 |
| CCNA_03294 | 8.3627E-05 | 8.1014E-05 | 4.5730E-02  | -1.8618E-01 |
| CCNA_03295 | 1.3106E-04 | 8.7039E-05 | 5.9042E-01  | 1.6125E-01  |
| CCNA_03296 | 1.8403E-04 | 1.3940E-04 | 4.0062E-01  | 4.0179E-02  |
| CCNA_03297 | 2.3635E-04 | 1.0250E-04 | 1.2052E+00  | 5.5337E-01  |
| CCNA_03298 | 7.4407E-05 | 9.9503E-05 | -4.1933E-01 | -4.8282E-01 |
| CCNA_03299 | 6.5219E-05 | 1.4553E-04 | -1.1579E+00 | -9.5393E-01 |
| CCNA_03300 | 5.8588E-05 | 8.6459E-05 | -5.6144E-01 | -5.7346E-01 |
| CCNA_03301 | 6.4016E-05 | 9.4282E-05 | -5.5856E-01 | -5.7163E-01 |
| CCNA_03302 | 8.4899E-05 | 0.0000E+00 | 1.3323E+01  | 8.2824E+00  |
| CCNA_03303 | 8.9130E-05 | 0.0000E+00 | 1.3393E+01  | 8.3272E+00  |
| CCNA_03304 | 9.4263E-05 | 1.3626E-04 | -5.3157E-01 | -5.5441E-01 |
| CCNA_03305 | 1.2417E-04 | 1.1822E-04 | 7.0722E-02  | -1.7024E-01 |
| CCNA_03306 | 3.0187E-04 | 5.0500E-04 | -7.4236E-01 | -6.8886E-01 |
| CCNA_03307 | 1.7651E-04 | 1.7507E-04 | 1.1785E-02  | -2.0783E-01 |
| CCNA_03308 | 3.5244E-04 | 6.5264E-04 | -8.8890E-01 | -7.8233E-01 |
| CCNA_03309 | 1.0018E-04 | 1.6258E-04 | -6.9850E-01 | -6.6088E-01 |
| CCNA_03310 | 9.3042E-05 | 6.1805E-05 | 5.9004E-01  | 1.6100E-01  |
| CCNA_03311 | 3.1049E-04 | 3.5521E-04 | -1.9414E-01 | -3.3919E-01 |
| CCNA_03312 | 4.8581E-04 | 6.0506E-04 | -3.1668E-01 | -4.1735E-01 |
| CCNA_03313 | 1.6714E-04 | 2.5267E-05 | 2.7253E+00  | 1.5230E+00  |
| CCNA_03314 | 1.4873E-04 | 7.2512E-05 | 1.0362E+00  | 4.4561E-01  |
| CCNA_03315 | 1.3827E-04 | 8.4586E-05 | 7.0886E-01  | 2.3679E-01  |
| CCNA_03316 | 1.6775E-04 | 1.2721E-04 | 3.9908E-01  | 3.9200E-02  |
| CCNA_03317 | 4.9760E-05 | 2.9079E-05 | 7.7472E-01  | 2.7880E-01  |
| CCNA_03318 | 4.5400E-05 | 3.0745E-05 | 5.6209E-01  | 1.4317E-01  |
| CCNA_03319 | 8.8413E-05 | 3.5137E-05 | 1.3310E+00  | 6.3362E-01  |
| CCNA_03320 | 9.3347E-05 | 1.8936E-05 | 2.3009E+00  | 1.2523E+00  |
| CCNA_03321 | 6.7286E-05 | 1.6265E-04 | -1.2734E+00 | -1.0276E+00 |
| CCNA_03322 | 4.5233E-05 | 1.3166E-04 | -1.5413E+00 | -1.1984E+00 |
| CCNA_03323 | 8.5158E-05 | 1.4003E-04 | -7.1749E-01 | -6.7300E-01 |
| CCNA_03324 | 1.6984E-04 | 1.1854E-04 | 5.1880E-01  | 1.1556E-01  |
| CCNA_03325 | 5.2694E-04 | 1.2407E-04 | 2.0864E+00  | 1.1155E+00  |
| CCNA_03326 | 4.4368E-04 | 1.4822E-04 | 1.5817E+00  | 7.9351E-01  |
| CCNA_03327 | 8.8557E-05 | 1.5547E-04 | -8.1200E-01 | -7.3328E-01 |
| CCNA_03328 | 9.4226E-05 | 1.6256E-04 | -7.8677E-01 | -7.1719E-01 |
| CCNA_03329 | 9.0739E-05 | 1.0275E-04 | -1.7940E-01 | -3.2978E-01 |
| CCNA_03330 | 6.2791E-05 | 1.2404E-04 | -9.8217E-01 | -8.4182E-01 |
| CCNA_03331 | 1.6159E-04 | 7.8271E-05 | 1.0456E+00  | 4.5160E-01  |
| CCNA_03332 | 1.0777E-04 | 1.6243E-04 | -5.9184E-01 | -5.9285E-01 |
| CCNA_03333 | 8.6129E-05 | 1.6219E-04 | -9.1315E-01 | -7.9780E-01 |
| CCNA_03334 | 2.7309E-04 | 1.6243E-04 | 7.4955E-01  | 2.6274E-01  |
| CCNA_03335 | 6.0067E-05 | 1.0604E-04 | -8.1997E-01 | -7.3836E-01 |
| CCNA_03336 | 8.5278E-05 | 1.5250E-04 | -8.3855E-01 | -7.5021E-01 |
| CCNA_03337 | 1.1657E-04 | 1.1405E-04 | 3.1417E-02  | -1.9531E-01 |
| CCNA_03338 | 8.6698E-05 | 5.1338E-05 | 7.5580E-01  | 2.6673E-01  |

|            |            |            |             |             |
|------------|------------|------------|-------------|-------------|
| CCNA_03339 | 9.4240E-05 | 8.3417E-05 | 1.7591E-01  | -1.0315E-01 |
| CCNA_03340 | 8.7567E-05 | 6.1506E-05 | 5.0953E-01  | 1.0965E-01  |
| CCNA_03341 | 1.1055E-04 | 1.2138E-04 | -1.3483E-01 | -3.0135E-01 |
| CCNA_03342 | 1.0715E-04 | 8.5058E-05 | 3.3309E-01  | -2.8904E-03 |
| CCNA_03343 | 6.8608E-05 | 1.6243E-04 | -1.2433E+00 | -1.0084E+00 |
| CCNA_03344 | 5.9512E-05 | 5.0327E-05 | 2.4173E-01  | -6.1169E-02 |
| CCNA_03345 | 8.1343E-05 | 9.1323E-05 | -1.6702E-01 | -3.2188E-01 |
| CCNA_03346 | 2.4410E-04 | 1.2217E-04 | 9.9853E-01  | 4.2155E-01  |
| CCNA_03347 | 2.7444E-04 | 1.6193E-04 | 7.6106E-01  | 2.7009E-01  |
| CCNA_03348 | 2.3400E-04 | 1.6195E-04 | 5.3087E-01  | 1.2326E-01  |
| CCNA_03349 | 1.1796E-04 | 1.1960E-04 | -1.9931E-02 | -2.2806E-01 |
| CCNA_03350 | 1.0690E-04 | 4.5521E-05 | 1.2315E+00  | 5.7013E-01  |
| CCNA_03351 | 1.2433E-04 | 1.2557E-04 | -1.4267E-02 | -2.2445E-01 |
| CCNA_03352 | 6.0544E-05 | 1.0459E-04 | -7.8871E-01 | -7.1843E-01 |
| CCNA_03353 | 1.1449E-04 | 1.5984E-04 | -4.8139E-01 | -5.2240E-01 |
| CCNA_03354 | 1.8513E-04 | 1.6263E-04 | 1.8685E-01  | -9.6169E-02 |
| CCNA_03355 | 9.6057E-05 | 4.9416E-05 | 9.5875E-01  | 3.9618E-01  |
| CCNA_03356 | 9.4572E-05 | 1.6243E-04 | -7.8029E-01 | -7.1306E-01 |
| CCNA_03357 | 2.4695E-04 | 3.2477E-04 | -3.9523E-01 | -4.6744E-01 |
| CCNA_03358 | 2.4870E-04 | 3.2485E-04 | -3.8539E-01 | -4.6117E-01 |
| CCNA_03359 | 6.6111E-05 | 1.1385E-04 | -7.8414E-01 | -7.1551E-01 |
| CCNA_03360 | 1.6209E-04 | 4.8562E-05 | 1.7387E+00  | 8.9368E-01  |
| CCNA_03361 | 8.6910E-05 | 9.3552E-05 | -1.0630E-01 | -2.8315E-01 |
| CCNA_03273 | 6.6079E-05 | 6.0471E-05 | 1.2785E-01  | -1.3380E-01 |
| CCNA_03362 | 7.5345E-05 | 1.0699E-04 | -5.0596E-01 | -5.3808E-01 |
| CCNA_03363 | 8.6933E-05 | 5.2167E-05 | 7.3662E-01  | 2.5450E-01  |
| CCNA_03364 | 6.4035E-05 | 1.6276E-04 | -1.3458E+00 | -1.0737E+00 |
| CCNA_03365 | 7.8203E-05 | 8.0152E-05 | -3.5582E-02 | -2.3805E-01 |
| CCNA_03366 | 6.0354E-05 | 7.7757E-05 | -3.6557E-01 | -4.4853E-01 |
| CCNA_03367 | 6.5658E-05 | 6.2567E-06 | 3.3897E+00  | 1.9467E+00  |
| CCNA_03368 | 7.3496E-05 | 1.1898E-04 | -6.9496E-01 | -6.5863E-01 |
| CCNA_03369 | 1.4292E-04 | 1.3094E-04 | 1.2619E-01  | -1.3486E-01 |
| CCNA_03370 | 1.5080E-04 | 1.5544E-04 | -4.3739E-02 | -2.4325E-01 |
| CCNA_03371 | 6.5302E-04 | 1.8154E-04 | 1.8468E+00  | 9.6262E-01  |
| CCNA_03372 | 2.0838E-04 | 2.9668E-04 | -5.0971E-01 | -5.4047E-01 |
| CCNA_03373 | 2.5912E-04 | 3.2537E-04 | -3.2851E-01 | -4.2489E-01 |
| CCNA_03374 | 9.1289E-05 | 7.8984E-05 | 2.0881E-01  | -8.2163E-02 |
| CCNA_03375 | 9.4549E-05 | 8.3417E-05 | 1.8065E-01  | -1.0013E-01 |
| CCNA_03376 | 7.9211E-05 | 6.1904E-05 | 3.5556E-01  | 1.1437E-02  |
| CCNA_03377 | 1.4850E-04 | 2.6726E-04 | -8.4778E-01 | -7.5610E-01 |
| CCNA_03378 | 1.3055E-04 | 3.2286E-04 | -1.3063E+00 | -1.0486E+00 |
| CCNA_03379 | 1.2425E-04 | 6.0645E-05 | 1.0346E+00  | 4.4456E-01  |
| CCNA_03380 | 7.7297E-05 | 4.0764E-05 | 9.2291E-01  | 3.7332E-01  |
| CCNA_03381 | 9.7213E-05 | 9.0147E-05 | 1.0881E-01  | -1.4595E-01 |
| CCNA_03382 | 7.5614E-05 | 1.2216E-04 | -6.9206E-01 | -6.5677E-01 |
| CCNA_03383 | 2.4250E-04 | 4.9030E-04 | -1.0157E+00 | -8.6321E-01 |
| CCNA_03384 | 2.3823E-04 | 4.8797E-04 | -1.0345E+00 | -8.7518E-01 |
| CCNA_03385 | 8.8815E-05 | 1.1380E-04 | -3.5762E-01 | -4.4346E-01 |
| CCNA_03386 | 1.1270E-04 | 6.7614E-05 | 7.3696E-01  | 2.5471E-01  |
| CCNA_03387 | 8.2383E-05 | 9.9304E-05 | -2.6953E-01 | -3.8727E-01 |
| CCNA_03388 | 5.8777E-05 | 3.1681E-05 | 8.9136E-01  | 3.5319E-01  |
| CCNA_03389 | 6.6139E-05 | 1.5652E-04 | -1.2427E+00 | -1.0080E+00 |
| CCNA_03390 | 6.0770E-05 | 9.4887E-05 | -6.4286E-01 | -6.2539E-01 |



|            |            |            |             |             |
|------------|------------|------------|-------------|-------------|
| CCNA_03391 | 8.5768E-05 | 8.0111E-05 | 9.8372E-02  | -1.5261E-01 |
| CCNA_03392 | 7.1050E-05 | 1.4016E-04 | -9.8016E-01 | -8.4054E-01 |
| CCNA_03393 | 3.2008E-04 | 1.6939E-04 | 9.1806E-01  | 3.7023E-01  |
| CCNA_03394 | 3.2384E-04 | 1.6243E-04 | 9.9545E-01  | 4.1959E-01  |
| CCNA_03395 | 2.8779E-04 | 2.6330E-04 | 1.2827E-01  | -1.3354E-01 |
| CCNA_03396 | 1.5427E-04 | 1.5634E-04 | -1.9252E-02 | -2.2763E-01 |
| CCNA_03397 | 9.3158E-05 | 1.6243E-04 | -8.0204E-01 | -7.2693E-01 |
| CCNA_03398 | 1.2133E-04 | 1.6277E-04 | -4.2398E-01 | -4.8579E-01 |
| CCNA_03399 | 2.0587E-04 | 1.6458E-04 | 3.2290E-01  | -9.3921E-03 |
| CCNA_03400 | 1.9160E-04 | 1.6243E-04 | 2.3824E-01  | -6.3390E-02 |
| CCNA_03401 | 3.0002E-04 | 2.7312E-04 | 1.3547E-01  | -1.2895E-01 |
| CCNA_03402 | 1.7070E-04 | 1.6412E-04 | 5.6702E-02  | -1.7918E-01 |
| CCNA_03403 | 1.3979E-04 | 1.6242E-04 | -2.1646E-01 | -3.5342E-01 |
| CCNA_03404 | 1.5577E-04 | 1.6571E-04 | -8.9271E-02 | -2.7229E-01 |
| CCNA_03405 | 7.0878E-04 | 3.2485E-04 | 1.1255E+00  | 5.0256E-01  |
| CCNA_03406 | 7.3688E-04 | 3.4887E-04 | 1.0787E+00  | 4.7270E-01  |
| CCNA_03407 | 8.8251E-05 | 1.3160E-04 | -5.7647E-01 | -5.8305E-01 |
| CCNA_03408 | 2.1928E-04 | 7.5992E-05 | 1.5287E+00  | 7.5971E-01  |
| CCNA_03409 | 6.7175E-05 | 1.4768E-04 | -1.1364E+00 | -9.4021E-01 |
| CCNA_03410 | 9.4975E-05 | 3.2162E-05 | 1.5619E+00  | 7.8088E-01  |
| CCNA_04013 | 8.3461E-05 | 1.6284E-05 | 2.3570E+00  | 1.2880E+00  |
| CCNA_03412 | 8.3285E-05 | 8.0592E-05 | 4.7360E-02  | -1.8514E-01 |
| CCNA_03413 | 8.9481E-05 | 9.9378E-05 | -1.5139E-01 | -3.1191E-01 |
| CCNA_03414 | 1.3872E-04 | 1.0292E-04 | 4.3062E-01  | 5.9314E-02  |
| CCNA_03415 | 1.3634E-04 | 1.6175E-04 | -2.4658E-01 | -3.7263E-01 |
| CCNA_03416 | 1.0537E-04 | 1.6243E-04 | -6.2427E-01 | -6.1354E-01 |
| CCNA_03417 | 6.2916E-05 | 4.0656E-05 | 6.2976E-01  | 1.8633E-01  |
| CCNA_03418 | 8.3045E-05 | 1.0405E-04 | -3.2538E-01 | -4.2290E-01 |
| CCNA_03419 | 8.9375E-05 | 1.5681E-04 | -8.1105E-01 | -7.3268E-01 |
| CCNA_03420 | 6.4155E-05 | 1.1741E-04 | -8.7193E-01 | -7.7150E-01 |
| CCNA_03421 | 5.6558E-05 | 1.1902E-04 | -1.0734E+00 | -9.0000E-01 |
| CCNA_03422 | 7.7505E-05 | 1.2231E-04 | -6.5818E-01 | -6.3517E-01 |
| CCNA_03423 | 1.1604E-04 | 9.1961E-05 | 3.3548E-01  | -1.3696E-03 |
| CCNA_03424 | 1.1256E-04 | 1.0165E-04 | 1.4704E-01  | -1.2156E-01 |
| CCNA_03425 | 7.9627E-05 | 7.9730E-05 | -1.9195E-03 | -2.1658E-01 |
| CCNA_03426 | 2.1698E-04 | 2.2566E-04 | -5.6657E-02 | -2.5149E-01 |
| CCNA_03427 | 2.1722E-04 | 1.8687E-04 | 2.1708E-01  | -7.6887E-02 |
| CCNA_03428 | 1.2815E-04 | 2.2983E-04 | -8.4272E-01 | -7.5287E-01 |
| CCNA_03429 | 4.1362E-04 | 6.5446E-04 | -6.6201E-01 | -6.3761E-01 |
| CCNA_03430 | 4.4979E-04 | 7.1285E-04 | -6.6434E-01 | -6.3910E-01 |
| CCNA_03431 | 4.4548E-04 | 6.9141E-04 | -6.3420E-01 | -6.1987E-01 |
| CCNA_03432 | 1.6094E-04 | 1.6243E-04 | -1.3312E-02 | -2.2384E-01 |
| CCNA_03433 | 1.4462E-04 | 1.2339E-04 | 2.2898E-01  | -6.9297E-02 |
| CCNA_03434 | 1.4499E-04 | 1.5272E-04 | -7.4994E-02 | -2.6319E-01 |
| CCNA_03435 | 7.6381E-05 | 1.3936E-04 | -8.6747E-01 | -7.6866E-01 |
| CCNA_03436 | 6.4617E-05 | 1.4568E-04 | -1.1728E+00 | -9.6339E-01 |
| CCNA_03437 | 7.0661E-05 | 7.1824E-05 | -2.3617E-02 | -2.3042E-01 |
| CCNA_03438 | 7.6168E-05 | 9.7099E-05 | -3.5030E-01 | -4.3879E-01 |
| CCNA_03439 | 7.6663E-05 | 9.1315E-05 | -2.5236E-01 | -3.7632E-01 |
| CCNA_03440 | 2.1067E-05 | 0.0000E+00 | 1.1312E+01  | 7.0000E+00  |
| CCNA_03441 | 0.0000E+00 | 0.0000E+00 | -8.4168E-01 | -7.5221E-01 |
| CCNA_03442 | 6.4493E-05 | 2.6643E-05 | 1.2750E+00  | 5.9792E-01  |
| CCNA_03443 | 1.6423E-04 | 8.7404E-05 | 9.0986E-01  | 3.6500E-01  |

|            |            |            |             |             |
|------------|------------|------------|-------------|-------------|
| CCNA_03444 | 1.6236E-04 | 6.7233E-05 | 1.2718E+00  | 5.9588E-01  |
| CCNA_03445 | 1.0082E-04 | 4.0880E-05 | 1.3021E+00  | 6.1521E-01  |
| CCNA_03446 | 1.3521E-04 | 7.8329E-05 | 7.8747E-01  | 2.8693E-01  |
| CCNA_03447 | 1.7751E-04 | 1.1054E-04 | 6.8322E-01  | 2.2043E-01  |
| CCNA_03448 | 8.2064E-05 | 1.0717E-04 | -3.8508E-01 | -4.6097E-01 |
| CCNA_03449 | 9.4845E-05 | 5.8001E-05 | 7.0936E-01  | 2.3711E-01  |
| CCNA_03450 | 1.0834E-04 | 1.3435E-04 | -3.1047E-01 | -4.1338E-01 |
| CCNA_03451 | 8.9879E-05 | 9.0553E-05 | -1.0829E-02 | -2.2226E-01 |
| CCNA_03452 | 8.2171E-05 | 5.8067E-05 | 5.0077E-01  | 1.0406E-01  |
| CCNA_03453 | 8.8131E-05 | 1.6276E-04 | -8.8500E-01 | -7.7984E-01 |
| CCNA_03454 | 8.5500E-05 | 1.2150E-04 | -5.0694E-01 | -5.3870E-01 |
| CCNA_03455 | 1.7474E-04 | 1.2094E-04 | 5.3081E-01  | 1.2322E-01  |
| CCNA_03456 | 6.4567E-05 | 7.7558E-05 | -2.6455E-01 | -3.8409E-01 |
| CCNA_03457 | 7.9096E-05 | 1.0565E-04 | -4.1767E-01 | -4.8176E-01 |
| CCNA_03458 | 1.1512E-04 | 1.0423E-04 | 1.4333E-01  | -1.2393E-01 |
| CCNA_03459 | 1.1824E-04 | 9.1530E-05 | 3.6936E-01  | 2.0243E-02  |
| CCNA_03460 | 9.0596E-05 | 1.1971E-04 | -4.0211E-01 | -4.7183E-01 |
| CCNA_03461 | 8.6610E-05 | 1.6273E-04 | -9.0990E-01 | -7.9572E-01 |
| CCNA_03462 | 7.3958E-05 | 1.4370E-04 | -9.5825E-01 | -8.2656E-01 |
| CCNA_03463 | 5.7857E-05 | 1.6258E-04 | -1.4906E+00 | -1.1661E+00 |
| CCNA_03464 | 8.7937E-05 | 8.3616E-05 | 7.2617E-02  | -1.6903E-01 |
| CCNA_03465 | 1.7865E-04 | 9.0669E-05 | 9.7839E-01  | 4.0871E-01  |
| CCNA_03466 | 2.2668E-04 | 1.6243E-04 | 4.8085E-01  | 9.1356E-02  |
| CCNA_03467 | 1.1410E-04 | 1.6243E-04 | -5.0950E-01 | -5.4033E-01 |
| CCNA_03468 | 1.1411E-04 | 1.6243E-04 | -5.0932E-01 | -5.4022E-01 |
| CCNA_03469 | 7.0786E-05 | 4.8985E-05 | 5.3098E-01  | 1.2333E-01  |
| CCNA_04011 | 2.6733E-04 | 1.6863E-04 | 6.6471E-01  | 2.0863E-01  |
| CCNA_03471 | 2.7295E-04 | 2.0546E-04 | 4.0975E-01  | 4.6006E-02  |
| CCNA_03472 | 8.9310E-05 | 1.6243E-04 | -8.6289E-01 | -7.6574E-01 |
| CCNA_03473 | 1.8372E-04 | 1.6243E-04 | 1.7766E-01  | -1.0203E-01 |
| CCNA_03474 | 1.9923E-04 | 2.0018E-04 | -6.8683E-03 | -2.1973E-01 |
| CCNA_03475 | 2.0977E-04 | 1.7132E-04 | 2.9208E-01  | -2.9049E-02 |
| CCNA_03476 | 7.5100E-05 | 1.5694E-04 | -1.0633E+00 | -8.9358E-01 |
| CCNA_03477 | 6.1861E-05 | 2.0022E-05 | 1.6270E+00  | 8.2242E-01  |
| CCNA_03478 | 6.9685E-05 | 6.9064E-05 | 1.2841E-02  | -2.0716E-01 |
| CCNA_03479 | 1.0532E-04 | 1.5620E-04 | -5.6867E-01 | -5.7807E-01 |
| CCNA_03480 | 1.1602E-04 | 1.6250E-04 | -4.8610E-01 | -5.2541E-01 |
| CCNA_03481 | 8.3886E-05 | 7.6133E-05 | 1.3983E-01  | -1.2616E-01 |
| CCNA_03482 | 7.2858E-05 | 1.5692E-04 | -1.1069E+00 | -9.2138E-01 |
| CCNA_03483 | 7.4393E-05 | 8.5497E-05 | -2.0077E-01 | -3.4341E-01 |
| CCNA_03484 | 5.6188E-05 | 4.2430E-05 | 4.0502E-01  | 4.2985E-02  |
| CCNA_03485 | 1.9825E-04 | 1.3449E-04 | 5.5979E-01  | 1.4171E-01  |
| CCNA_03486 | 1.2573E-04 | 1.6139E-04 | -3.6019E-01 | -4.4510E-01 |
| CCNA_03487 | 1.2148E-04 | 1.2629E-04 | -5.6017E-02 | -2.5108E-01 |
| CCNA_03488 | 1.0140E-04 | 1.0044E-04 | 1.3652E-02  | -2.0664E-01 |
| CCNA_03489 | 6.0946E-05 | 6.5932E-05 | -1.1352E-01 | -2.8776E-01 |
| CCNA_03490 | 5.2387E-05 | 3.4582E-05 | 5.9897E-01  | 1.6669E-01  |
| CCNA_03491 | 6.3725E-05 | 1.0205E-04 | -6.7931E-01 | -6.4864E-01 |
| CCNA_03492 | 6.0687E-05 | 1.4947E-04 | -1.3003E+00 | -1.0448E+00 |
| CCNA_03493 | 8.8399E-05 | 1.6320E-04 | -8.8450E-01 | -7.7953E-01 |
| CCNA_03494 | 1.1560E-04 | 6.8832E-05 | 7.4785E-01  | 2.6166E-01  |
| CCNA_03495 | 2.2844E-04 | 1.5407E-04 | 5.6813E-01  | 1.4703E-01  |
| CCNA_03496 | 6.7290E-05 | 8.9401E-05 | -4.0992E-01 | -4.7682E-01 |

|            |            |            |             |             |
|------------|------------|------------|-------------|-------------|
| CCNA_03497 | 6.6301E-05 | 5.4869E-05 | 2.7293E-01  | -4.1268E-02 |
| CCNA_03498 | 7.6686E-05 | 8.1569E-05 | -8.9117E-02 | -2.7219E-01 |
| CCNA_03499 | 7.4726E-05 | 1.6031E-04 | -1.1012E+00 | -9.1774E-01 |
| CCNA_03500 | 8.5398E-05 | 1.2345E-04 | -5.3169E-01 | -5.5449E-01 |
| CCNA_03501 | 7.1752E-05 | 1.2416E-04 | -7.9106E-01 | -7.1993E-01 |
| CCNA_03502 | 1.2271E-04 | 1.5918E-04 | -3.7546E-01 | -4.5483E-01 |
| CCNA_03503 | 1.1212E-04 | 8.1917E-05 | 4.5273E-01  | 7.3417E-02  |
| CCNA_03504 | 1.1334E-04 | 1.1420E-04 | -1.1036E-02 | -2.2239E-01 |
| CCNA_03505 | 1.6828E-04 | 1.4399E-04 | 2.2489E-01  | -7.1910E-02 |
| CCNA_03506 | 1.5774E-04 | 1.6243E-04 | -4.2285E-02 | -2.4232E-01 |
| CCNA_03507 | 1.8312E-04 | 1.6752E-04 | 1.2836E-01  | -1.3348E-01 |
| CCNA_03508 | 1.3423E-04 | 1.0585E-04 | 3.4265E-01  | 3.2079E-03  |
| CCNA_03509 | 6.3868E-05 | 9.9768E-05 | -6.4349E-01 | -6.2580E-01 |
| CCNA_03510 | 6.5084E-05 | 1.4387E-04 | -1.1444E+00 | -9.4528E-01 |
| CCNA_03511 | 6.9205E-05 | 1.6110E-04 | -1.2190E+00 | -9.9288E-01 |
| CCNA_03512 | 5.4694E-05 | 1.9657E-05 | 1.4759E+00  | 7.2602E-01  |
| CCNA_03513 | 2.6760E-04 | 1.0773E-04 | 1.3126E+00  | 6.2186E-01  |
| CCNA_03514 | 1.4990E-04 | 6.8194E-05 | 1.1361E+00  | 5.0930E-01  |
| CCNA_03515 | 1.1239E-04 | 1.2649E-04 | -1.7044E-01 | -3.2407E-01 |
| CCNA_03516 | 8.5705E-04 | 6.3835E-05 | 3.7468E+00  | 2.1745E+00  |
| CCNA_03517 | 8.5916E-05 | 8.6260E-05 | -5.8216E-03 | -2.1906E-01 |
| CCNA_03518 | 1.1955E-03 | 2.9674E-04 | 2.0103E+00  | 1.0669E+00  |
| CCNA_03519 | 8.3765E-04 | 1.7290E-04 | 2.2763E+00  | 1.2366E+00  |
| CCNA_03520 | 8.7197E-05 | 1.6013E-04 | -8.7690E-01 | -7.7467E-01 |
| CCNA_03521 | 7.3551E-05 | 1.1445E-04 | -6.3794E-01 | -6.2226E-01 |
| CCNA_03522 | 1.1736E-04 | 7.6431E-05 | 6.1855E-01  | 1.7918E-01  |
| CCNA_03523 | 6.4169E-05 | 1.4661E-04 | -1.1921E+00 | -9.7570E-01 |
| CCNA_03524 | 1.6835E-04 | 1.0718E-04 | 6.5137E-01  | 2.0012E-01  |
| CCNA_03525 | 1.3668E-04 | 1.6194E-04 | -2.4471E-01 | -3.7144E-01 |
| CCNA_03526 | 1.7024E-04 | 8.1279E-05 | 1.0665E+00  | 4.6489E-01  |
| CCNA_03527 | 8.3516E-05 | 1.0233E-04 | -2.9312E-01 | -4.0231E-01 |
| CCNA_03528 | 1.5639E-04 | 1.6243E-04 | -5.4688E-02 | -2.5023E-01 |
| CCNA_03529 | 1.6380E-04 | 1.5438E-04 | 8.5420E-02  | -1.6087E-01 |
| CCNA_03530 | 1.0705E-04 | 8.6840E-05 | 3.0182E-01  | -2.2839E-02 |
| CCNA_03531 | 1.3930E-04 | 1.6244E-04 | -2.2179E-01 | -3.5682E-01 |
| CCNA_03532 | 1.2046E-04 | 1.5252E-04 | -3.4046E-01 | -4.3251E-01 |
| CCNA_03533 | 6.6842E-05 | 1.4243E-04 | -1.0914E+00 | -9.1150E-01 |
| CCNA_03534 | 1.8625E-04 | 2.0337E-04 | -1.2690E-01 | -2.9630E-01 |
| CCNA_03535 | 8.7525E-05 | 5.2971E-05 | 7.2435E-01  | 2.4667E-01  |
| CCNA_03536 | 8.5958E-05 | 1.6272E-04 | -9.2065E-01 | -8.0258E-01 |
| CCNA_03537 | 8.7622E-05 | 1.5503E-04 | -8.2321E-01 | -7.4043E-01 |
| CCNA_03538 | 1.3292E-04 | 9.7597E-05 | 4.4564E-01  | 6.8895E-02  |
| CCNA_03539 | 1.0556E-04 | 1.5963E-04 | -5.9658E-01 | -5.9588E-01 |
| CCNA_03540 | 1.1389E-04 | 5.7214E-05 | 9.9308E-01  | 4.1808E-01  |
| CCNA_03541 | 8.0081E-05 | 7.8851E-05 | 2.2249E-02  | -2.0116E-01 |
| CCNA_03542 | 8.7955E-05 | 1.6221E-04 | -8.8302E-01 | -7.7858E-01 |
| CCNA_03543 | 9.6191E-05 | 1.1299E-04 | -2.3231E-01 | -3.6353E-01 |
| CCNA_03544 | 7.3417E-05 | 6.9363E-05 | 8.1878E-02  | -1.6313E-01 |
| CCNA_03545 | 3.7122E-04 | 1.7617E-04 | 1.0752E+00  | 4.7047E-01  |
| CCNA_03546 | 1.0453E-04 | 1.6189E-04 | -6.3105E-01 | -6.1786E-01 |
| CCNA_03547 | 1.5226E-04 | 1.4298E-04 | 9.0748E-02  | -1.5747E-01 |
| CCNA_03548 | 1.3290E-04 | 1.2990E-04 | 3.2873E-02  | -1.9438E-01 |
| CCNA_03549 | 5.9757E-05 | 0.0000E+00 | 1.2816E+01  | 7.9593E+00  |

|            |            |            |             |             |
|------------|------------|------------|-------------|-------------|
| CCNA_03550 | 2.5926E-04 | 1.8785E-04 | 4.6475E-01  | 8.1086E-02  |
| CCNA_03551 | 1.1116E-04 | 1.1142E-04 | -3.3598E-03 | -2.1749E-01 |
| CCNA_03552 | 2.4004E-04 | 1.6946E-04 | 5.0226E-01  | 1.0501E-01  |
| CCNA_03553 | 7.6723E-05 | 6.1390E-05 | 3.2154E-01  | -1.0257E-02 |
| CCNA_03554 | 1.5806E-04 | 1.1008E-04 | 5.2187E-01  | 1.1752E-01  |
| CCNA_03555 | 1.5369E-04 | 7.3862E-05 | 1.0570E+00  | 4.5885E-01  |
| CCNA_03556 | 6.6643E-05 | 4.4833E-05 | 5.7172E-01  | 1.4932E-01  |
| CCNA_03557 | 1.4605E-04 | 3.0558E-04 | -1.0650E+00 | -8.9468E-01 |
| CCNA_03558 | 8.5366E-05 | 3.7830E-05 | 1.1739E+00  | 5.3340E-01  |
| CCNA_03559 | 1.0523E-04 | 1.6126E-04 | -6.1582E-01 | -6.0815E-01 |
| CCNA_03560 | 8.2582E-05 | 5.4628E-05 | 5.9605E-01  | 1.6483E-01  |
| CCNA_03561 | 8.8903E-05 | 1.4390E-04 | -6.9473E-01 | -6.5848E-01 |
| CCNA_03562 | 8.8131E-05 | 3.8535E-05 | 1.1933E+00  | 5.4576E-01  |
| CCNA_03563 | 1.8068E-04 | 2.7994E-04 | -6.3168E-01 | -6.1827E-01 |
| CCNA_03564 | 9.6117E-05 | 4.9681E-05 | 9.5193E-01  | 3.9183E-01  |
| CCNA_03565 | 2.5697E-04 | 2.0453E-04 | 3.2922E-01  | -5.3617E-03 |
| CCNA_03566 | 2.6213E-04 | 3.1405E-04 | -2.6073E-01 | -3.8166E-01 |
| CCNA_03567 | 4.0974E-04 | 8.0597E-04 | -9.7603E-01 | -8.3790E-01 |
| CCNA_03568 | 1.7853E-04 | 1.6276E-04 | 1.3343E-01  | -1.3025E-01 |
| CCNA_03569 | 5.5605E-05 | 1.2383E-04 | -1.1550E+00 | -9.5205E-01 |
| CCNA_03570 | 4.2422E-05 | 3.0944E-05 | 4.5492E-01  | 7.4816E-02  |
| CCNA_03571 | 5.5230E-05 | 1.9698E-05 | 1.4869E+00  | 7.3306E-01  |
| CCNA_03572 | 8.3553E-05 | 1.1302E-04 | -4.3582E-01 | -4.9334E-01 |
| CCNA_03573 | 1.0918E-04 | 9.1158E-05 | 2.6021E-01  | -4.9381E-02 |
| CCNA_03574 | 2.0412E-04 | 2.3244E-04 | -1.8741E-01 | -3.3489E-01 |
| CCNA_03575 | 2.0998E-04 | 2.0360E-04 | 4.4464E-02  | -1.8699E-01 |
| CCNA_03576 | 6.1644E-05 | 9.4406E-05 | -6.1493E-01 | -6.0758E-01 |
| CCNA_03577 | 1.3323E-04 | 1.6122E-04 | -2.7512E-01 | -3.9084E-01 |
| CCNA_03578 | 1.3511E-04 | 1.0921E-04 | 3.0704E-01  | -1.9511E-02 |
| CCNA_03579 | 7.5452E-05 | 1.6243E-04 | -1.1061E+00 | -9.2090E-01 |
| CCNA_03580 | 1.2551E-04 | 1.6243E-04 | -3.7197E-01 | -4.5261E-01 |
| CCNA_03581 | 1.3549E-04 | 1.6243E-04 | -2.6166E-01 | -3.8225E-01 |
| CCNA_03582 | 1.1650E-04 | 1.6243E-04 | -4.7941E-01 | -5.2114E-01 |
| CCNA_03583 | 1.6912E-04 | 2.5269E-04 | -5.7934E-01 | -5.8488E-01 |
| CCNA_03584 | 1.3627E-04 | 1.6258E-04 | -2.5468E-01 | -3.7780E-01 |
| CCNA_03585 | 9.3176E-05 | 1.6272E-04 | -8.0433E-01 | -7.2839E-01 |
| CCNA_03586 | 1.4039E-04 | 1.2605E-04 | 1.5533E-01  | -1.1628E-01 |
| CCNA_03587 | 6.6832E-05 | 9.3785E-05 | -4.8883E-01 | -5.2715E-01 |
| CCNA_03588 | 7.1415E-05 | 4.7477E-05 | 5.8885E-01  | 1.6024E-01  |
| CCNA_03589 | 1.4051E-04 | 9.0387E-05 | 6.3644E-01  | 1.9059E-01  |
| CCNA_03590 | 2.1500E-04 | 1.2032E-04 | 8.3739E-01  | 3.1877E-01  |
| CCNA_03591 | 2.1477E-04 | 1.2233E-04 | 8.1192E-01  | 3.0252E-01  |
| CCNA_03592 | 6.7739E-05 | 2.5706E-05 | 1.3975E+00  | 6.7602E-01  |
| CCNA_03593 | 1.2752E-04 | 1.8909E-04 | -5.6833E-01 | -5.7786E-01 |
| CCNA_03594 | 1.3240E-04 | 2.2740E-04 | -7.8028E-01 | -7.1305E-01 |
| CCNA_03595 | 7.2280E-05 | 7.7733E-05 | -1.0499E-01 | -2.8232E-01 |
| CCNA_03596 | 1.0071E-04 | 1.5457E-04 | -6.1808E-01 | -6.0959E-01 |
| CCNA_03597 | 4.7222E-04 | 1.9400E-04 | 1.2834E+00  | 6.0323E-01  |
| CCNA_03598 | 4.5842E-04 | 1.6961E-04 | 1.4344E+00  | 6.9956E-01  |
| CCNA_03599 | 7.0190E-05 | 1.6425E-04 | -1.2265E+00 | -9.9769E-01 |
| CCNA_03600 | 8.5149E-05 | 9.6983E-05 | -1.8780E-01 | -3.3514E-01 |
| CCNA_03601 | 1.4271E-04 | 1.6243E-04 | -1.8668E-01 | -3.3443E-01 |
| CCNA_03602 | 6.1297E-05 | 1.2412E-04 | -1.0178E+00 | -8.6453E-01 |

|            |            |            |             |             |
|------------|------------|------------|-------------|-------------|
| CCNA_03603 | 1.0601E-04 | 1.3050E-04 | -2.9996E-01 | -4.0668E-01 |
| CCNA_03604 | 9.6246E-05 | 1.4870E-04 | -6.2764E-01 | -6.1569E-01 |
| CCNA_03605 | 9.6792E-05 | 9.5541E-05 | 1.8707E-02  | -2.0342E-01 |
| CCNA_03606 | 8.5740E-05 | 1.6243E-04 | -9.2173E-01 | -8.0327E-01 |
| CCNA_03607 | 1.6829E-04 | 7.9995E-05 | 1.0729E+00  | 4.6899E-01  |
| CCNA_03608 | 9.9571E-05 | 1.2571E-04 | -3.3628E-01 | -4.2985E-01 |
| CCNA_03609 | 8.1268E-04 | 4.5455E-04 | 8.3822E-01  | 3.1930E-01  |
| CCNA_03610 | 5.8851E-05 | 1.2501E-04 | -1.0869E+00 | -9.0861E-01 |
| CCNA_03611 | 8.4723E-05 | 1.0099E-04 | -2.5349E-01 | -3.7704E-01 |
| CCNA_03612 | 6.0419E-05 | 7.0291E-05 | -2.1840E-01 | -3.5466E-01 |
| CCNA_03613 | 5.7223E-05 | 8.2862E-05 | -5.3413E-01 | -5.5604E-01 |
| CCNA_03614 | 1.8898E-04 | 1.2680E-04 | 5.7561E-01  | 1.5179E-01  |
| CCNA_03615 | 8.7738E-05 | 1.2052E-04 | -4.5800E-01 | -5.0749E-01 |
| CCNA_03616 | 5.1295E-05 | 1.4917E-07 | 8.3479E+00  | 5.1093E+00  |
| CCNA_03617 | 4.2015E-05 | 4.2968E-05 | -3.2498E-02 | -2.3608E-01 |
| CCNA_03618 | 6.8247E-05 | 1.6243E-04 | -1.2509E+00 | -1.0132E+00 |
| CCNA_03619 | 7.7260E-05 | 1.1221E-04 | -5.3839E-01 | -5.5876E-01 |
| CCNA_03620 | 5.3108E-05 | 1.5667E-04 | -1.5607E+00 | -1.2108E+00 |
| CCNA_03621 | 8.5995E-05 | 1.7399E-04 | -1.0166E+00 | -8.6381E-01 |
| CCNA_03622 | 9.1479E-05 | 1.7316E-04 | -9.2057E-01 | -8.0253E-01 |
| CCNA_03623 | 6.6134E-05 | 1.4741E-04 | -1.1563E+00 | -9.5292E-01 |
| CCNA_03624 | 7.7325E-05 | 1.1650E-04 | -5.9134E-01 | -5.9253E-01 |
| CCNA_03625 | 7.2585E-05 | 1.6204E-04 | -1.1586E+00 | -9.5438E-01 |
| CCNA_03626 | 6.2759E-05 | 1.1545E-04 | -8.7934E-01 | -7.7623E-01 |
| CCNA_03627 | 5.6442E-05 | 7.6307E-05 | -4.3509E-01 | -4.9287E-01 |
| CCNA_03628 | 1.3981E-04 | 1.5515E-04 | -1.5027E-01 | -3.1120E-01 |
| CCNA_03629 | 2.1911E-04 | 1.4022E-05 | 3.9651E+00  | 2.3138E+00  |
| CCNA_03630 | 2.2174E-04 | 9.8765E-05 | 1.1667E+00  | 5.2882E-01  |
| CCNA_03631 | 2.2282E-04 | 1.0074E-04 | 1.1452E+00  | 5.1509E-01  |
| CCNA_03632 | 1.5728E-04 | 4.8272E-05 | 1.7039E+00  | 8.7145E-01  |
| CCNA_03633 | 9.0707E-05 | 8.7296E-05 | 5.5234E-02  | -1.8012E-01 |
| CCNA_03634 | 2.8008E-05 | 3.4449E-05 | -2.9873E-01 | -4.0589E-01 |
| CCNA_03635 | 3.7215E-05 | 1.4668E-05 | 1.3426E+00  | 6.4099E-01  |
| CCNA_03636 | 1.0408E-04 | 1.4329E-04 | -4.6122E-01 | -5.0954E-01 |
| CCNA_03637 | 1.1401E-04 | 1.7608E-04 | -6.2708E-01 | -6.1533E-01 |
| CCNA_03638 | 3.5209E-04 | 3.8064E-04 | -1.1250E-01 | -2.8711E-01 |
| CCNA_03639 | 1.0767E-04 | 1.5063E-04 | -4.8441E-01 | -5.2433E-01 |
| CCNA_03640 | 1.0685E-04 | 8.9624E-05 | 2.5355E-01  | -5.3629E-02 |
| CCNA_03641 | 1.2247E-04 | 1.4258E-04 | -2.1936E-01 | -3.5527E-01 |
| CCNA_03642 | 7.9035E-05 | 6.0089E-05 | 3.9528E-01  | 3.6772E-02  |
| CCNA_03643 | 8.6004E-05 | 1.6163E-04 | -9.1022E-01 | -7.9593E-01 |
| CCNA_03644 | 1.3214E-04 | 1.6243E-04 | -2.9775E-01 | -4.0527E-01 |
| CCNA_03645 | 1.1976E-04 | 1.6243E-04 | -4.3960E-01 | -4.9575E-01 |
| CCNA_03646 | 1.1349E-04 | 1.2654E-04 | -1.5705E-01 | -3.1552E-01 |
| CCNA_03647 | 9.8387E-05 | 6.4084E-05 | 6.1840E-01  | 1.7909E-01  |
| CCNA_03648 | 7.8208E-05 | 1.4936E-04 | -9.3338E-01 | -8.1070E-01 |
| CCNA_03649 | 9.7740E-05 | 1.3525E-04 | -4.6866E-01 | -5.1428E-01 |
| CCNA_03650 | 8.4848E-05 | 6.0835E-05 | 4.7986E-01  | 9.0720E-02  |
| CCNA_03651 | 9.6001E-05 | 1.2400E-04 | -3.6923E-01 | -4.5086E-01 |
| CCNA_03652 | 6.3984E-05 | 1.4855E-04 | -1.2152E+00 | -9.9044E-01 |
| CCNA_03653 | 1.0780E-04 | 1.5565E-04 | -5.2991E-01 | -5.5335E-01 |
| CCNA_03654 | 6.4835E-05 | 4.8736E-05 | 4.1163E-01  | 4.7206E-02  |
| CCNA_03655 | 8.2060E-05 | 5.0601E-05 | 6.9736E-01  | 2.2945E-01  |

|            |            |            |             |             |
|------------|------------|------------|-------------|-------------|
| CCNA_03656 | 4.9285E-04 | 1.6243E-04 | 1.6013E+00  | 8.0603E-01  |
| CCNA_03657 | 1.3209E-04 | 8.8481E-05 | 5.7803E-01  | 1.5334E-01  |
| CCNA_03658 | 1.1790E-04 | 1.6243E-04 | -4.6222E-01 | -5.1018E-01 |
| CCNA_03659 | 1.0249E-04 | 1.5769E-04 | -6.2167E-01 | -6.1188E-01 |
| CCNA_03660 | 1.3621E-04 | 3.9985E-05 | 1.7680E+00  | 9.1237E-01  |
| CCNA_03661 | 7.0342E-05 | 1.3631E-04 | -9.5437E-01 | -8.2409E-01 |
| CCNA_03662 | 6.3448E-05 | 1.0992E-04 | -7.9281E-01 | -7.2104E-01 |
| CCNA_03663 | 1.8296E-04 | 1.6243E-04 | 1.7169E-01  | -1.0584E-01 |
| CCNA_03664 | 1.8094E-04 | 1.6243E-04 | 1.5571E-01  | -1.1604E-01 |
| CCNA_03665 | 8.6212E-05 | 6.5940E-05 | 3.8663E-01  | 3.1258E-02  |
| CCNA_03666 | 8.9893E-05 | 1.4295E-04 | -6.6926E-01 | -6.4223E-01 |
| CCNA_03667 | 9.0499E-05 | 6.1995E-05 | 5.4562E-01  | 1.3266E-01  |
| CCNA_03668 | 7.4985E-05 | 1.2091E-04 | -6.8925E-01 | -6.5499E-01 |
| CCNA_03669 | 1.0709E-04 | 1.4036E-04 | -3.9025E-01 | -4.6427E-01 |
| CCNA_03670 | 1.0559E-04 | 1.6275E-04 | -6.2423E-01 | -6.1351E-01 |
| CCNA_03671 | 6.6689E-05 | 2.4182E-05 | 1.4631E+00  | 7.1790E-01  |
| CCNA_03672 | 8.4677E-05 | 1.4864E-04 | -8.1175E-01 | -7.3312E-01 |
| CCNA_03673 | 1.0333E-04 | 1.1460E-04 | -1.4940E-01 | -3.1064E-01 |
| CCNA_03674 | 3.9947E-04 | 2.0193E-04 | 9.8420E-01  | 4.1241E-01  |
| CCNA_03675 | 3.9201E-04 | 2.1322E-04 | 8.7852E-01  | 3.4501E-01  |
| CCNA_03676 | 1.0785E-04 | 7.5553E-05 | 5.1335E-01  | 1.1208E-01  |
| CCNA_03677 | 6.7901E-05 | 1.2870E-04 | -9.2249E-01 | -8.0375E-01 |
| CCNA_03678 | 6.5510E-05 | 3.6786E-05 | 8.3232E-01  | 3.1554E-01  |
| CCNA_03679 | 8.4113E-05 | 1.6243E-04 | -9.4938E-01 | -8.2091E-01 |
| CCNA_03680 | 7.2996E-05 | 9.4762E-05 | -3.7653E-01 | -4.5552E-01 |
| CCNA_03681 | 2.0262E-04 | 1.2758E-04 | 6.6735E-01  | 2.1031E-01  |
| CCNA_03682 | 2.4690E-04 | 1.2639E-04 | 9.6605E-01  | 4.0084E-01  |
| CCNA_03683 | 7.8046E-05 | 7.9373E-05 | -2.4397E-02 | -2.3091E-01 |
| CCNA_03684 | 9.1442E-05 | 1.1425E-04 | -3.2124E-01 | -4.2025E-01 |
| CCNA_03685 | 6.0761E-05 | 1.5982E-04 | -1.3952E+00 | -1.1053E+00 |
| CCNA_03686 | 9.9895E-05 | 1.3796E-04 | -4.6582E-01 | -5.1247E-01 |
| CCNA_03687 | 1.6127E-04 | 1.8813E-04 | -2.2229E-01 | -3.5714E-01 |
| CCNA_03688 | 1.0855E-03 | 4.8761E-04 | 1.1545E+00  | 5.2105E-01  |
| CCNA_03689 | 1.0574E-03 | 4.9120E-04 | 1.1061E+00  | 4.9018E-01  |
| CCNA_03690 | 2.0521E-04 | 5.5490E-05 | 1.8866E+00  | 9.8801E-01  |
| CCNA_03691 | 1.6202E-04 | 1.1481E-04 | 4.9688E-01  | 1.0158E-01  |
| CCNA_03692 | 1.8033E-04 | 1.6243E-04 | 1.5083E-01  | -1.1915E-01 |
| CCNA_03693 | 6.1024E-04 | 2.8578E-04 | 1.0944E+00  | 4.8273E-01  |
| CCNA_03694 | 6.1603E-04 | 2.8362E-04 | 1.1190E+00  | 4.9838E-01  |
| CCNA_03695 | 1.0483E-04 | 1.6506E-04 | -6.5491E-01 | -6.3308E-01 |
| CCNA_03696 | 7.3755E-05 | 8.7238E-05 | -2.4226E-01 | -3.6988E-01 |
| CCNA_03697 | 8.6957E-05 | 1.6074E-04 | -8.8632E-01 | -7.8068E-01 |
| CCNA_03698 | 6.7073E-05 | 1.5955E-04 | -1.2502E+00 | -1.0128E+00 |
| CCNA_03699 | 7.9988E-05 | 1.6243E-04 | -1.0219E+00 | -8.6717E-01 |
| CCNA_03700 | 1.3266E-04 | 1.3179E-04 | 9.4786E-03  | -2.0931E-01 |
| CCNA_03701 | 1.2667E-04 | 1.2394E-04 | 3.1359E-02  | -1.9535E-01 |
| CCNA_03702 | 2.1154E-04 | 3.2575E-04 | -6.2280E-01 | -6.1260E-01 |
| CCNA_03703 | 5.4454E-05 | 6.1904E-05 | -1.8508E-01 | -3.3340E-01 |
| CCNA_03704 | 1.4902E-04 | 2.4684E-04 | -7.2805E-01 | -6.7973E-01 |
| CCNA_03705 | 1.1657E-04 | 1.9665E-04 | -7.5440E-01 | -6.9654E-01 |
| CCNA_03706 | 3.0397E-04 | 2.0956E-04 | 5.3649E-01  | 1.2685E-01  |
| CCNA_03707 | 8.4853E-05 | 1.6243E-04 | -9.3675E-01 | -8.1285E-01 |
| CCNA_03708 | 0.0000E+00 | 0.0000E+00 | -8.4168E-01 | -7.5221E-01 |

|            |            |            |             |             |
|------------|------------|------------|-------------|-------------|
| CCNA_03709 | 6.7729E-05 | 0.0000E+00 | 1.2997E+01  | 8.0745E+00  |
| CCNA_03710 | 1.2016E-04 | 1.3013E-04 | -1.1508E-01 | -2.8875E-01 |
| CCNA_03711 | 1.6976E-04 | 1.1654E-04 | 5.4260E-01  | 1.3074E-01  |
| CCNA_03712 | 8.6836E-05 | 1.5309E-04 | -8.1806E-01 | -7.3714E-01 |
| CCNA_03713 | 1.2261E-04 | 1.6243E-04 | -4.0574E-01 | -4.7415E-01 |
| CCNA_03714 | 1.7600E-04 | 1.3803E-04 | 3.5054E-01  | 8.2396E-03  |
| CCNA_03715 | 2.1810E-04 | 1.6243E-04 | 4.2514E-01  | 5.5821E-02  |
| CCNA_03716 | 1.5168E-04 | 1.4082E-04 | 1.0708E-01  | -1.4705E-01 |
| CCNA_03717 | 5.5347E-04 | 3.5907E-04 | 6.2423E-01  | 1.8281E-01  |
| CCNA_03718 | 5.4332E-04 | 5.7276E-04 | -7.6135E-02 | -2.6391E-01 |
| CCNA_03719 | 9.1900E-05 | 1.6243E-04 | -8.2165E-01 | -7.3944E-01 |
| CCNA_03720 | 7.7542E-05 | 7.3158E-05 | 8.3881E-02  | -1.6185E-01 |
| CCNA_03721 | 9.2792E-05 | 1.5744E-04 | -7.6271E-01 | -7.0184E-01 |
| CCNA_03722 | 7.3228E-05 | 1.4685E-04 | -1.0038E+00 | -8.5564E-01 |
| CCNA_03723 | 7.9026E-05 | 7.6473E-05 | 4.7311E-02  | -1.8517E-01 |
| CCNA_03724 | 8.9148E-05 | 7.0954E-05 | 3.2924E-01  | -5.3503E-03 |
| CCNA_03725 | 1.2862E-04 | 1.6243E-04 | -3.3664E-01 | -4.3007E-01 |
| CCNA_03726 | 9.4730E-05 | 1.0622E-04 | -1.6525E-01 | -3.2076E-01 |
| CCNA_03727 | 9.9617E-05 | 1.1227E-04 | -1.7258E-01 | -3.2543E-01 |
| CCNA_03728 | 1.2656E-04 | 1.3606E-04 | -1.0440E-01 | -2.8194E-01 |
| CCNA_03729 | 1.1702E-04 | 1.3662E-04 | -2.2347E-01 | -3.5789E-01 |
| CCNA_03730 | 6.3679E-05 | 4.6250E-05 | 4.6120E-01  | 7.8824E-02  |
| CCNA_03731 | 1.0272E-04 | 8.6707E-05 | 2.4436E-01  | -5.9492E-02 |
| CCNA_03732 | 1.2734E-04 | 1.3278E-04 | -6.0295E-02 | -2.5381E-01 |
| CCNA_03733 | 1.2387E-04 | 1.6159E-04 | -3.8357E-01 | -4.6001E-01 |
| CCNA_03734 | 5.7262E-04 | 3.2485E-04 | 8.1778E-01  | 3.0626E-01  |
| CCNA_03735 | 5.8608E-04 | 3.0985E-04 | 9.1950E-01  | 3.7114E-01  |
| CCNA_03736 | 4.5819E-04 | 3.6282E-04 | 3.3671E-01  | -5.8545E-04 |
| CCNA_03737 | 1.5666E-04 | 1.7245E-04 | -1.3852E-01 | -3.0371E-01 |
| CCNA_03738 | 8.9005E-05 | 8.4263E-05 | 7.8926E-02  | -1.6501E-01 |
| CCNA_03739 | 7.2802E-05 | 6.2791E-05 | 2.1333E-01  | -7.9284E-02 |
| CCNA_03740 | 2.7947E-04 | 1.6118E-04 | 7.9396E-01  | 2.9107E-01  |
| CCNA_03741 | 1.6749E-04 | 1.0785E-04 | 6.3497E-01  | 1.8966E-01  |
| CCNA_03742 | 1.8732E-04 | 9.3072E-05 | 1.0090E+00  | 4.2822E-01  |
| CCNA_03743 | 1.1033E-04 | 1.6243E-04 | -5.5795E-01 | -5.7124E-01 |
| CCNA_03744 | 8.5135E-05 | 1.4870E-04 | -8.0462E-01 | -7.2857E-01 |
| CCNA_03745 | 2.6000E-04 | 1.8440E-04 | 4.9570E-01  | 1.0083E-01  |
| CCNA_03746 | 2.4909E-04 | 2.0675E-04 | 2.6879E-01  | -4.3904E-02 |
| CCNA_03747 | 1.4074E-04 | 1.1096E-04 | 3.4294E-01  | 3.3920E-03  |
| CCNA_03748 | 1.0720E-04 | 1.1491E-04 | -1.0027E-01 | -2.7931E-01 |
| CCNA_03749 | 8.3410E-05 | 4.9341E-05 | 7.5727E-01  | 2.6766E-01  |
| CCNA_03750 | 8.0635E-05 | 1.5663E-04 | -9.5790E-01 | -8.2634E-01 |
| CCNA_03751 | 2.3791E-04 | 1.3686E-04 | 7.9766E-01  | 2.9343E-01  |
| CCNA_03752 | 2.2713E-04 | 1.1130E-04 | 1.0290E+00  | 4.4096E-01  |
| CCNA_03753 | 9.6718E-05 | 1.4624E-04 | -5.9651E-01 | -5.9583E-01 |
| CCNA_03754 | 2.1784E-04 | 2.7890E-04 | -3.5651E-01 | -4.4275E-01 |
| CCNA_03755 | 7.0171E-05 | 1.2812E-04 | -8.6852E-01 | -7.6933E-01 |
| CCNA_03756 | 2.1295E-04 | 1.0809E-04 | 9.7820E-01  | 4.0858E-01  |
| CCNA_03757 | 5.9004E-05 | 6.1573E-05 | -6.1567E-02 | -2.5462E-01 |
| CCNA_03758 | 6.7591E-05 | 1.1916E-04 | -8.1800E-01 | -7.3710E-01 |
| CCNA_03759 | 1.1217E-04 | 1.6238E-04 | -5.3378E-01 | -5.5582E-01 |
| CCNA_03760 | 9.7213E-05 | 1.1186E-04 | -2.0250E-01 | -3.4451E-01 |
| CCNA_03761 | 9.2066E-05 | 1.0775E-04 | -2.2696E-01 | -3.6012E-01 |

|            |            |            |             |             |
|------------|------------|------------|-------------|-------------|
| CCNA_03762 | 4.0072E-04 | 2.3689E-04 | 7.5838E-01  | 2.6837E-01  |
| CCNA_03763 | 1.1221E-04 | 1.2643E-04 | -1.7210E-01 | -3.2512E-01 |
| CCNA_03764 | 1.0574E-04 | 1.3280E-04 | -3.2883E-01 | -4.2509E-01 |
| CCNA_03765 | 1.0083E-04 | 9.5525E-05 | 7.7903E-02  | -1.6566E-01 |
| CCNA_03766 | 6.7290E-05 | 2.3113E-05 | 1.5413E+00  | 7.6775E-01  |
| CCNA_03767 | 9.1220E-05 | 7.9174E-05 | 2.0424E-01  | -8.5080E-02 |
| CCNA_03768 | 1.3514E-04 | 2.0504E-04 | -6.0150E-01 | -5.9901E-01 |
| CCNA_03769 | 1.1152E-04 | 1.2111E-04 | -1.1902E-01 | -2.9127E-01 |
| CCNA_03770 | 2.5116E-04 | 2.0907E-04 | 2.6456E-01  | -4.6606E-02 |
| CCNA_03771 | 2.6448E-04 | 2.3826E-04 | 1.5060E-01  | -1.1929E-01 |
| CCNA_03772 | 7.3172E-05 | 7.2984E-05 | 3.6394E-03  | -2.1303E-01 |
| CCNA_03773 | 1.1046E-04 | 1.3070E-04 | -2.4285E-01 | -3.7025E-01 |
| CCNA_03774 | 1.0090E-04 | 1.6243E-04 | -6.8682E-01 | -6.5344E-01 |
| CCNA_03775 | 9.5280E-05 | 1.6069E-04 | -7.5400E-01 | -6.9629E-01 |
| CCNA_03776 | 7.7306E-05 | 1.6243E-04 | -1.0711E+00 | -8.9856E-01 |
| CCNA_03777 | 1.6197E-04 | 2.0128E-04 | -3.1349E-01 | -4.1531E-01 |
| CCNA_03778 | 1.6198E-04 | 2.0343E-04 | -3.2871E-01 | -4.2502E-01 |
| CCNA_03779 | 1.2664E-04 | 2.6250E-04 | -1.0516E+00 | -8.8609E-01 |
| CCNA_03780 | 1.2800E-04 | 1.6242E-04 | -3.4353E-01 | -4.3447E-01 |
| CCNA_03781 | 3.7518E-04 | 2.2796E-04 | 7.1878E-01  | 2.4311E-01  |
| CCNA_03782 | 3.7151E-04 | 2.3161E-04 | 6.8168E-01  | 2.1945E-01  |
| CCNA_03783 | 1.1521E-04 | 1.1523E-04 | -3.7260E-04 | -2.1559E-01 |
| CCNA_03784 | 7.3607E-05 | 9.1489E-05 | -3.1380E-01 | -4.1551E-01 |
| CCNA_04010 | 6.6768E-05 | 7.4915E-05 | -1.6616E-01 | -3.2134E-01 |
| CCNA_03786 | 1.3510E-04 | 6.9769E-05 | 9.5324E-01  | 3.9266E-01  |
| CCNA_03787 | 8.4127E-05 | 7.7733E-05 | 1.1397E-01  | -1.4266E-01 |
| CCNA_03788 | 9.0600E-05 | 1.6221E-04 | -8.4028E-01 | -7.5132E-01 |
| CCNA_03789 | 3.1497E-04 | 1.6255E-04 | 9.5426E-01  | 3.9332E-01  |
| CCNA_03790 | 2.8662E-04 | 1.6279E-04 | 8.1605E-01  | 3.0516E-01  |
| CCNA_03791 | 1.0271E-04 | 1.1821E-04 | -2.0286E-01 | -3.4474E-01 |
| CCNA_03792 | 8.6110E-05 | 1.6088E-04 | -9.0177E-01 | -7.9054E-01 |
| CCNA_03793 | 1.9738E-04 | 1.6650E-04 | 2.4543E-01  | -5.8807E-02 |
| CCNA_03794 | 2.0953E-04 | 2.4781E-04 | -2.4209E-01 | -3.6977E-01 |
| CCNA_03795 | 1.0184E-04 | 1.2289E-04 | -2.7112E-01 | -3.8828E-01 |
| CCNA_03796 | 8.2069E-05 | 1.2378E-04 | -5.9283E-01 | -5.9348E-01 |
| CCNA_03797 | 5.8800E-05 | 1.3906E-04 | -1.2418E+00 | -1.0074E+00 |
| CCNA_03798 | 8.5454E-05 | 1.6018E-04 | -9.0648E-01 | -7.9354E-01 |
| CCNA_03799 | 8.7696E-05 | 8.4801E-05 | 4.8366E-02  | -1.8450E-01 |
| CCNA_03800 | 1.1340E-04 | 1.6235E-04 | -5.1775E-01 | -5.4559E-01 |
| CCNA_03801 | 1.1351E-04 | 1.1843E-04 | -6.1282E-02 | -2.5444E-01 |
| CCNA_03802 | 6.8687E-05 | 2.1008E-05 | 1.7086E+00  | 8.7449E-01  |
| CCNA_03803 | 1.5894E-04 | 9.5898E-05 | 7.2879E-01  | 2.4950E-01  |
| CCNA_03804 | 8.9551E-05 | 1.1865E-04 | -4.0591E-01 | -4.7426E-01 |
| CCNA_03805 | 2.5444E-04 | 8.8870E-05 | 1.5175E+00  | 7.5255E-01  |
| CCNA_03806 | 2.7653E-04 | 1.3807E-04 | 1.0020E+00  | 4.2374E-01  |
| CCNA_03807 | 8.8094E-05 | 7.1277E-05 | 3.0552E-01  | -2.0479E-02 |
| CCNA_03808 | 9.6459E-05 | 1.0357E-04 | -1.0268E-01 | -2.8085E-01 |
| CCNA_03809 | 8.0492E-05 | 7.9837E-05 | 1.1714E-02  | -2.0788E-01 |
| CCNA_03810 | 8.1662E-05 | 1.4453E-04 | -8.2368E-01 | -7.4073E-01 |
| CCNA_03811 | 6.0641E-04 | 3.1137E-04 | 9.6164E-01  | 3.9803E-01  |
| CCNA_03812 | 5.9756E-04 | 3.0224E-04 | 9.8338E-01  | 4.1189E-01  |
| CCNA_03813 | 6.5049E-04 | 1.6693E-04 | 1.9623E+00  | 1.0363E+00  |
| CCNA_03814 | 7.1304E-05 | 1.5652E-04 | -1.1343E+00 | -9.3883E-01 |



|            |            |            |             |             |
|------------|------------|------------|-------------|-------------|
| CCNA_03815 | 4.9372E-05 | 7.9183E-05 | -6.8152E-01 | -6.5005E-01 |
| CCNA_03816 | 2.0434E-04 | 1.6243E-04 | 3.3111E-01  | -4.1538E-03 |
| CCNA_03817 | 1.8055E-04 | 1.6243E-04 | 1.5257E-01  | -1.1804E-01 |
| CCNA_03818 | 4.6653E-05 | 0.0000E+00 | 1.2459E+01  | 7.7315E+00  |
| CCNA_03819 | 1.0086E-04 | 1.8066E-06 | 5.7964E+00  | 3.4819E+00  |
| CCNA_03820 | 7.9586E-05 | 1.0053E-04 | -3.3708E-01 | -4.3036E-01 |
| CCNA_03821 | 2.7952E-04 | 1.9300E-04 | 5.3435E-01  | 1.2548E-01  |
| CCNA_03822 | 1.1084E-04 | 1.5766E-04 | -5.0830E-01 | -5.3957E-01 |
| CCNA_03823 | 1.0484E-04 | 9.8086E-05 | 9.5992E-02  | -1.5412E-01 |
| CCNA_03824 | 7.1507E-05 | 1.6190E-04 | -1.1790E+00 | -9.6734E-01 |
| CCNA_03825 | 1.0152E-04 | 1.0027E-04 | 1.7863E-02  | -2.0396E-01 |
| CCNA_03826 | 1.5574E-04 | 6.5302E-05 | 1.2538E+00  | 5.8435E-01  |
| CCNA_03827 | 1.5212E-04 | 1.0031E-04 | 6.0072E-01  | 1.6781E-01  |
| CCNA_03828 | 1.3028E-04 | 1.6093E-04 | -3.0476E-01 | -4.0974E-01 |
| CCNA_03829 | 3.2321E-04 | 3.8108E-04 | -2.3764E-01 | -3.6693E-01 |
| CCNA_03830 | 6.5725E-04 | 3.9903E-04 | 7.1992E-01  | 2.4385E-01  |
| CCNA_03831 | 5.4454E-05 | 5.7661E-05 | -8.2660E-02 | -2.6808E-01 |
| CCNA_03832 | 7.8823E-05 | 7.7434E-05 | 2.5572E-02  | -1.9904E-01 |
| CCNA_03833 | 7.3718E-05 | 1.6243E-04 | -1.1397E+00 | -9.4229E-01 |
| CCNA_03834 | 8.0353E-05 | 1.2750E-04 | -6.6613E-01 | -6.4024E-01 |
| CCNA_03835 | 1.3362E-04 | 1.4749E-04 | -1.4251E-01 | -3.0625E-01 |
| CCNA_03836 | 1.7223E-04 | 1.9639E-04 | -1.8934E-01 | -3.3612E-01 |
| CCNA_03837 | 2.5516E-04 | 1.6273E-04 | 6.4884E-01  | 1.9851E-01  |
| CCNA_03838 | 2.4588E-04 | 9.4240E-05 | 1.3834E+00  | 6.6706E-01  |
| CCNA_03839 | 1.8559E-04 | 1.6211E-04 | 1.9509E-01  | -9.0915E-02 |
| CCNA_03840 | 1.1549E-04 | 9.8981E-05 | 2.2246E-01  | -7.3460E-02 |
| CCNA_03841 | 6.0641E-05 | 1.0739E-04 | -8.2453E-01 | -7.4127E-01 |
| CCNA_03842 | 1.1139E-04 | 1.5410E-04 | -4.6824E-01 | -5.1401E-01 |
| CCNA_03843 | 7.8194E-05 | 1.5876E-04 | -1.0217E+00 | -8.6706E-01 |
| CCNA_03844 | 8.4899E-05 | 1.5079E-04 | -8.2874E-01 | -7.4395E-01 |
| CCNA_03845 | 6.7253E-05 | 1.1417E-04 | -7.6352E-01 | -7.0236E-01 |
| CCNA_03846 | 1.1460E-04 | 1.5943E-04 | -4.7625E-01 | -5.1912E-01 |
| CCNA_03847 | 9.2700E-05 | 9.2517E-05 | 2.7954E-03  | -2.1357E-01 |
| CCNA_03848 | 1.4502E-04 | 1.8759E-04 | -3.7136E-01 | -4.5222E-01 |
| CCNA_03849 | 1.3265E-04 | 1.6304E-04 | -2.9765E-01 | -4.0520E-01 |
| CCNA_03850 | 8.2282E-05 | 8.0981E-05 | 2.2919E-02  | -2.0073E-01 |
| CCNA_03851 | 8.5657E-05 | 1.0358E-04 | -2.7413E-01 | -3.9021E-01 |
| CCNA_03852 | 1.1828E-04 | 1.6243E-04 | -4.5753E-01 | -5.0719E-01 |
| CCNA_03853 | 8.5287E-05 | 8.0451E-05 | 8.4155E-02  | -1.6167E-01 |
| CCNA_03854 | 8.1833E-05 | 1.1828E-04 | -5.3148E-01 | -5.5435E-01 |
| CCNA_03855 | 5.4722E-05 | 1.4884E-04 | -1.4436E+00 | -1.1361E+00 |
| CCNA_03856 | 8.1995E-05 | 1.4926E-04 | -8.6420E-01 | -7.6658E-01 |
| CCNA_03857 | 1.4435E-04 | 1.6547E-04 | -1.9704E-01 | -3.4103E-01 |
| CCNA_03858 | 1.5439E-04 | 2.1062E-04 | -4.4804E-01 | -5.0113E-01 |
| CCNA_03859 | 4.2877E-04 | 2.0297E-04 | 1.0789E+00  | 4.7278E-01  |
| CCNA_03860 | 5.2678E-04 | 2.3309E-04 | 1.1763E+00  | 5.3492E-01  |
| CCNA_03861 | 9.6635E-05 | 1.5869E-04 | -7.1559E-01 | -6.7178E-01 |
| CCNA_03862 | 1.0479E-04 | 1.6243E-04 | -6.3233E-01 | -6.1868E-01 |
| CCNA_03863 | 3.8530E-04 | 2.5832E-04 | 5.7682E-01  | 1.5257E-01  |
| CCNA_03864 | 3.7846E-04 | 3.0472E-04 | 3.1261E-01  | -1.5958E-02 |
| CCNA_03865 | 7.2354E-05 | 6.7672E-05 | 9.6420E-02  | -1.5385E-01 |
| CCNA_03866 | 3.5730E-04 | 1.0114E-04 | 1.8206E+00  | 9.4593E-01  |
| CCNA_03867 | 8.8843E-05 | 7.3705E-05 | 2.6941E-01  | -4.3509E-02 |

|            |            |            |             |             |
|------------|------------|------------|-------------|-------------|
| CCNA_03868 | 7.9711E-05 | 1.1776E-04 | -5.6301E-01 | -5.7446E-01 |
| CCNA_03869 | 9.5359E-05 | 1.0119E-04 | -8.5725E-02 | -2.7003E-01 |
| CCNA_03870 | 8.3553E-05 | 8.9028E-05 | -9.1614E-02 | -2.7379E-01 |
| CCNA_03871 | 2.3267E-04 | 1.3395E-04 | 7.9652E-01  | 2.9270E-01  |
| CCNA_03872 | 1.1578E-04 | 6.3686E-05 | 8.6225E-01  | 3.3463E-01  |
| CCNA_03873 | 1.4888E-04 | 1.2328E-04 | 2.7216E-01  | -4.1755E-02 |
| CCNA_03874 | 1.4924E-04 | 8.8961E-05 | 7.4628E-01  | 2.6066E-01  |
| CCNA_03875 | 9.2862E-05 | 1.3739E-04 | -5.6515E-01 | -5.7583E-01 |
| CCNA_03876 | 1.6812E-04 | 1.1273E-04 | 5.7660E-01  | 1.5243E-01  |
| CCNA_03877 | 1.1501E-04 | 1.6144E-04 | -4.8924E-01 | -5.2741E-01 |
| CCNA_03878 | 8.6568E-05 | 1.6243E-04 | -9.0787E-01 | -7.9443E-01 |
| CCNA_03879 | 9.7717E-05 | 9.6528E-05 | 1.7612E-02  | -2.0412E-01 |
