# Supplementary material for: DNA Binding of the Cell Cycle Transcriptional Regulator GcrA Depends on N6-Adenosine Methylation in Caulobacter crescentus and Other Alphaproteobacteria
Source: PubMed Central journal article supplement (PMC3667746; doi:10.1371/journal.pgen.1003541), 2013-05-30
Supplement: pgen.1003541.s019.pdf [file pgen.1003541.s019.pdf]

| <b>Gene</b> | <b>Normalized coverage 100-300 m6A wt</b> | <b>Normalized coverage 100-300 m6A delccrM</b> | <b>log2(RATIO)</b> | <b>Z-score(log2RATIO)</b> |
|-------------|-------------------------------------------|------------------------------------------------|--------------------|---------------------------|
| CCNA_00001  | 4.46077E-04                               | 1.51962E-04                                    | 1.5535E+00         | 9.1186E-01                |
| CCNA_00002  | 7.18130E-05                               | 1.30370E-04                                    | -8.6032E-01        | -4.6470E-01               |
| CCNA_00003  | 1.01419E-04                               | 1.47399E-04                                    | -5.3943E-01        | -2.8170E-01               |
| CCNA_00004  | 3.71841E-05                               | 1.43436E-04                                    | -1.9476E+00        | -1.0848E+00               |
| CCNA_00005  | 1.47671E-04                               | 1.42828E-04                                    | 4.8057E-02         | 5.3328E-02                |
| CCNA_00006  | 1.80533E-04                               | 1.47099E-04                                    | 2.9543E-01         | 1.9440E-01                |
| CCNA_00007  | 1.95732E-04                               | 1.18805E-04                                    | 7.2022E-01         | 4.3665E-01                |
| CCNA_00008  | 2.72748E-04                               | 1.46221E-04                                    | 8.9937E-01         | 5.3881E-01                |
| CCNA_00009  | 2.86162E-04                               | 9.72127E-05                                    | 1.5575E+00         | 9.1414E-01                |
| CCNA_00010  | 2.68478E-04                               | 1.47099E-04                                    | 8.6796E-01         | 5.2090E-01                |
| CCNA_00011  | 1.47782E-04                               | 1.47099E-04                                    | 6.6447E-03         | 2.9712E-02                |
| CCNA_00012  | 1.26504E-04                               | 9.44659E-05                                    | 4.2124E-01         | 2.6615E-01                |
| CCNA_00013  | 9.10295E-05                               | 8.87395E-05                                    | 3.6683E-02         | 4.6842E-02                |
| CCNA_00014  | 6.52550E-05                               | 1.44127E-04                                    | -1.1432E+00        | -6.2601E-01               |
| CCNA_00015  | 5.71500E-05                               | 1.47346E-04                                    | -1.3664E+00        | -7.5329E-01               |
| CCNA_00016  | 1.40156E-04                               | 1.47324E-04                                    | -7.2001E-02        | -1.5138E-02               |
| CCNA_00017  | 1.55361E-04                               | 1.11540E-04                                    | 4.7799E-01         | 2.9851E-01                |
| CCNA_00018  | 2.30237E-05                               | 1.26685E-04                                    | -2.4599E+00        | -1.3769E+00               |
| CCNA_00019  | 2.55910E-05                               | 9.00829E-05                                    | -1.8156E+00        | -1.0095E+00               |
| CCNA_00020  | 2.29563E-04                               | 1.33470E-04                                    | 7.8232E-01         | 4.7206E-01                |
| CCNA_00021  | 4.66133E-05                               | 1.39894E-04                                    | -1.5855E+00        | -8.7825E-01               |
| CCNA_00022  | 3.04184E-05                               | 1.47099E-04                                    | -2.2737E+00        | -1.2707E+00               |
| CCNA_00023  | 2.65540E-05                               | 9.04657E-05                                    | -1.7684E+00        | -9.8255E-01               |
| CCNA_00024  | 9.51858E-05                               | 5.07415E-05                                    | 9.0741E-01         | 5.4340E-01                |
| CCNA_00025  | 1.94347E-04                               | 1.47099E-04                                    | 4.0180E-01         | 2.5506E-01                |
| CCNA_00026  | 3.95918E-05                               | 1.37800E-04                                    | -1.7993E+00        | -1.0002E+00               |
| CCNA_00027  | 2.03981E-04                               | 9.00904E-05                                    | 1.1789E+00         | 6.9822E-01                |
| CCNA_00028  | 1.07257E-04                               | 9.67699E-05                                    | 1.4838E-01         | 1.1054E-01                |
| CCNA_00029  | 1.29393E-04                               | 1.45538E-04                                    | -1.6967E-01        | -7.0836E-02               |
| CCNA_00030  | 1.24626E-04                               | 8.70434E-05                                    | 5.1771E-01         | 3.2116E-01                |
| CCNA_00031  | 3.60807E-04                               | 1.38198E-04                                    | 1.3844E+00         | 8.1543E-01                |
| CCNA_00032  | 1.32752E-04                               | 1.32974E-04                                    | -2.4600E-03        | 2.4520E-02                |
| CCNA_00033  | 8.92237E-05                               | 8.28781E-05                                    | 1.0635E-01         | 8.6574E-02                |
| CCNA_00034  | 3.27509E-05                               | 1.22760E-04                                    | -1.9062E+00        | -1.0611E+00               |
| CCNA_00035  | 3.93600E-05                               | 1.05070E-04                                    | -1.4165E+00        | -7.8190E-01               |
| CCNA_00036  | 1.45206E-04                               | 7.41722E-05                                    | 9.6903E-01         | 5.7854E-01                |
| CCNA_00037  | 4.86297E-05                               | 1.16868E-04                                    | -1.2650E+00        | -6.9547E-01               |
| CCNA_00038  | 2.44503E-05                               | 6.77329E-05                                    | -1.4700E+00        | -8.1238E-01               |
| CCNA_00039  | 7.15331E-05                               | 1.19112E-04                                    | -7.3567E-01        | -3.9361E-01               |
| CCNA_00040  | 6.27239E-05                               | 1.47677E-04                                    | -1.2354E+00        | -6.7857E-01               |
| CCNA_00041  | 1.22194E-04                               | 7.67465E-05                                    | 6.7090E-01         | 4.0852E-01                |
| CCNA_00042  | 1.40592E-04                               | 1.49876E-04                                    | -9.2289E-02        | -2.6708E-02               |
| CCNA_00043  | 1.58951E-04                               | 1.47099E-04                                    | 1.1175E-01         | 8.9652E-02                |
| CCNA_00044  | 3.02535E-04                               | 1.42963E-04                                    | 1.0814E+00         | 6.4262E-01                |
| CCNA_00045  | 3.02803E-04                               | 1.09258E-04                                    | 1.4706E+00         | 8.6454E-01                |
| CCNA_00046  | 1.01365E-04                               | 8.79890E-05                                    | 2.0408E-01         | 1.4230E-01                |
| CCNA_00047  | 2.54405E-05                               | 1.46198E-04                                    | -2.5226E+00        | -1.4127E+00               |
| CCNA_00048  | 4.26830E-04                               | 8.92348E-05                                    | 2.2579E+00         | 1.3135E+00                |
| CCNA_00049  | 2.01844E-04                               | 9.32200E-05                                    | 1.1144E+00         | 6.6146E-01                |
| CCNA_00050  | 5.70417E-05                               | 1.15690E-04                                    | -1.0202E+00        | -5.5587E-01               |

|            |             |             |             |             |
|------------|-------------|-------------|-------------|-------------|
| CCNA_00051 | 2.24730E-05 | 9.45784E-05 | -2.0732E+00 | -1.1564E+00 |
| CCNA_00052 | 1.30089E-04 | 1.21882E-04 | 9.3957E-02  | 7.9504E-02  |
| CCNA_00053 | 2.18108E-05 | 8.82667E-05 | -2.0167E+00 | -1.1242E+00 |
| CCNA_00054 | 3.77017E-05 | 1.22812E-04 | -1.7037E+00 | -9.4567E-01 |
| CCNA_00055 | 2.82256E-04 | 7.11627E-05 | 1.9877E+00  | 1.1594E+00  |
| CCNA_00056 | 2.37009E-05 | 9.68149E-05 | -2.0302E+00 | -1.1319E+00 |
| CCNA_00057 | 1.67742E-04 | 1.36817E-04 | 2.9395E-01  | 1.9355E-01  |
| CCNA_00058 | 5.29425E-05 | 1.46783E-04 | -1.4712E+00 | -8.1306E-01 |
| CCNA_00059 | 3.00121E-05 | 1.09919E-04 | -1.8728E+00 | -1.0421E+00 |
| CCNA_00060 | 5.70356E-05 | 1.46408E-04 | -1.3601E+00 | -7.4969E-01 |
| CCNA_00061 | 4.06993E-05 | 8.90697E-05 | -1.1299E+00 | -6.1846E-01 |
| CCNA_00062 | 2.92808E-05 | 1.18805E-04 | -2.0205E+00 | -1.1263E+00 |
| CCNA_00063 | 6.37411E-05 | 1.59324E-04 | -1.3217E+00 | -7.2780E-01 |
| CCNA_00064 | 1.22492E-04 | 8.43040E-05 | 5.3892E-01  | 3.3326E-01  |
| CCNA_00065 | 3.78251E-05 | 9.74153E-05 | -1.3648E+00 | -7.5239E-01 |
| CCNA_00066 | 2.85916E-05 | 1.46858E-04 | -2.3607E+00 | -1.3203E+00 |
| CCNA_00067 | 2.26385E-05 | 4.12477E-05 | -8.6560E-01 | -4.6771E-01 |
| CCNA_00068 | 2.11006E-05 | 1.27683E-04 | -2.5971E+00 | -1.4551E+00 |
| CCNA_00069 | 6.16585E-05 | 1.47099E-04 | -1.2544E+00 | -6.8944E-01 |
| CCNA_00070 | 1.01112E-04 | 9.01655E-05 | 1.6523E-01  | 1.2015E-01  |
| CCNA_00071 | 1.94904E-05 | 3.51536E-05 | -8.5099E-01 | -4.5938E-01 |
| CCNA_00072 | 1.30405E-04 | 8.42365E-05 | 6.3038E-01  | 3.8542E-01  |
| CCNA_00073 | 1.42868E-04 | 1.34430E-04 | 8.7771E-02  | 7.5976E-02  |
| CCNA_00074 | 1.18246E-04 | 1.47099E-04 | -3.1503E-01 | -1.5373E-01 |
| CCNA_00075 | 3.25944E-05 | 9.05557E-05 | -1.4742E+00 | -8.1476E-01 |
| CCNA_00076 | 5.01436E-05 | 1.35668E-04 | -1.4359E+00 | -7.9296E-01 |
| CCNA_00077 | 9.78855E-05 | 1.47662E-04 | -5.9316E-01 | -3.1234E-01 |
| CCNA_00078 | 2.05618E-05 | 1.47684E-04 | -2.8443E+00 | -1.5961E+00 |
| CCNA_00079 | 2.76796E-05 | 1.29162E-04 | -2.2222E+00 | -1.2414E+00 |
| CCNA_00080 | 2.76826E-05 | 1.32757E-04 | -2.2617E+00 | -1.2638E+00 |
| CCNA_00081 | 4.57802E-04 | 1.47099E-04 | 1.6379E+00  | 9.5997E-01  |
| CCNA_00082 | 1.47084E-04 | 1.47354E-04 | -2.6880E-03 | 2.4390E-02  |
| CCNA_00083 | 1.84632E-04 | 1.00725E-04 | 8.7415E-01  | 5.2443E-01  |
| CCNA_00084 | 1.94260E-04 | 5.63478E-05 | 1.7854E+00  | 1.0441E+00  |
| CCNA_00085 | 4.51054E-05 | 9.62896E-05 | -1.0941E+00 | -5.9801E-01 |
| CCNA_00086 | 4.99630E-05 | 2.51269E-05 | 9.9129E-01  | 5.9123E-01  |
| CCNA_00087 | 2.09092E-04 | 6.44832E-05 | 1.6970E+00  | 9.9368E-01  |
| CCNA_00088 | 1.88361E-04 | 7.02846E-05 | 1.4221E+00  | 8.3691E-01  |
| CCNA_00089 | 6.31151E-05 | 1.43684E-04 | -1.1868E+00 | -6.5091E-01 |
| CCNA_00090 | 3.67718E-05 | 1.47099E-04 | -2.0001E+00 | -1.1147E+00 |
| CCNA_00091 | 2.94018E-04 | 1.12771E-04 | 1.3824E+00  | 8.1429E-01  |
| CCNA_00092 | 1.61214E-04 | 8.47844E-05 | 9.2701E-01  | 5.5457E-01  |
| CCNA_00093 | 2.19920E-04 | 1.24268E-04 | 8.2345E-01  | 4.9552E-01  |
| CCNA_00094 | 1.65870E-04 | 9.33476E-05 | 8.2928E-01  | 4.9884E-01  |
| CCNA_00095 | 2.54676E-05 | 1.25019E-04 | -2.2953E+00 | -1.2831E+00 |
| CCNA_00096 | 2.82123E-05 | 7.83225E-05 | -1.4731E+00 | -8.1414E-01 |
| CCNA_00097 | 1.41363E-05 | 1.51219E-04 | -3.4189E+00 | -1.9238E+00 |
| CCNA_00098 | 2.73125E-05 | 1.38228E-04 | -2.3393E+00 | -1.3081E+00 |
| CCNA_00099 | 1.49459E-05 | 8.69308E-05 | -2.5400E+00 | -1.4226E+00 |
| CCNA_00100 | 2.28281E-05 | 1.47099E-04 | -2.6878E+00 | -1.5069E+00 |
| CCNA_00101 | 6.87672E-05 | 1.39639E-04 | -1.0219E+00 | -5.5686E-01 |
| CCNA_00102 | 8.33399E-05 | 9.54115E-05 | -1.9522E-01 | -8.5406E-02 |
| CCNA_00103 | 2.71018E-05 | 6.53313E-05 | -1.2694E+00 | -6.9798E-01 |

|            |             |             |             |             |
|------------|-------------|-------------|-------------|-------------|
| CCNA_00104 | 1.38871E-04 | 8.43941E-05 | 7.1843E-01  | 4.3563E-01  |
| CCNA_00105 | 1.71378E-04 | 1.05941E-04 | 6.9384E-01  | 4.2160E-01  |
| CCNA_00106 | 8.32165E-05 | 1.09994E-04 | -4.0253E-01 | -2.0363E-01 |
| CCNA_00107 | 1.67465E-04 | 1.35924E-04 | 3.0101E-01  | 1.9758E-01  |
| CCNA_00108 | 3.04756E-05 | 8.07392E-05 | -1.4056E+00 | -7.7566E-01 |
| CCNA_00109 | 3.66574E-05 | 1.36442E-04 | -1.8961E+00 | -1.0554E+00 |
| CCNA_00110 | 4.01516E-05 | 8.06191E-05 | -1.0057E+00 | -5.4760E-01 |
| CCNA_00111 | 3.09000E-05 | 1.19930E-04 | -1.9565E+00 | -1.0898E+00 |
| CCNA_00112 | 7.93130E-05 | 1.17319E-04 | -5.6484E-01 | -2.9619E-01 |
| CCNA_00113 | 4.11177E-05 | 5.64303E-05 | -4.5680E-01 | -2.3458E-01 |
| CCNA_00114 | 1.44469E-04 | 7.75720E-05 | 8.9704E-01  | 5.3748E-01  |
| CCNA_00115 | 1.27675E-04 | 1.27541E-04 | 1.4677E-03  | 2.6759E-02  |
| CCNA_00116 | 1.09448E-04 | 1.46941E-04 | -4.2502E-01 | -2.1646E-01 |
| CCNA_00117 | 9.44545E-05 | 1.40262E-04 | -5.7046E-01 | -2.9940E-01 |
| CCNA_00118 | 8.43421E-05 | 9.72878E-05 | -2.0607E-01 | -9.1592E-02 |
| CCNA_00119 | 3.32887E-04 | 1.16065E-04 | 1.5200E+00  | 8.9275E-01  |
| CCNA_00120 | 2.35926E-05 | 7.93432E-05 | -1.7497E+00 | -9.7191E-01 |
| CCNA_00121 | 2.14527E-05 | 6.98719E-05 | -1.7035E+00 | -9.4555E-01 |
| CCNA_00122 | 2.41734E-05 | 8.63679E-05 | -1.8370E+00 | -1.0217E+00 |
| CCNA_00123 | 2.25031E-05 | 1.44157E-04 | -2.6793E+00 | -1.5020E+00 |
| CCNA_00124 | 1.69680E-04 | 1.13326E-04 | 5.8227E-01  | 3.5798E-01  |
| CCNA_00125 | 4.41303E-05 | 1.47099E-04 | -1.7369E+00 | -9.6460E-01 |
| CCNA_00126 | 1.22185E-04 | 1.00770E-04 | 2.7793E-01  | 1.8442E-01  |
| CCNA_00127 | 1.21761E-04 | 1.12268E-04 | 1.1705E-01  | 9.2671E-02  |
| CCNA_00128 | 2.96690E-05 | 1.19713E-04 | -2.0125E+00 | -1.1218E+00 |
| CCNA_00129 | 2.98887E-05 | 9.72277E-05 | -1.7017E+00 | -9.4454E-01 |
| CCNA_00130 | 3.70306E-05 | 1.20381E-04 | -1.7008E+00 | -9.4400E-01 |
| CCNA_00131 | 3.71781E-05 | 1.20861E-04 | -1.7008E+00 | -9.4401E-01 |
| CCNA_00132 | 3.32776E-04 | 1.35451E-04 | 1.2967E+00  | 7.6541E-01  |
| CCNA_00133 | 5.85344E-05 | 1.18024E-04 | -1.0117E+00 | -5.5105E-01 |
| CCNA_00134 | 2.54314E-05 | 7.41047E-05 | -1.5429E+00 | -8.5397E-01 |
| CCNA_00135 | 5.94614E-05 | 9.17565E-05 | -6.2590E-01 | -3.3102E-01 |
| CCNA_00136 | 1.95145E-05 | 6.96392E-05 | -1.8353E+00 | -1.0207E+00 |
| CCNA_00137 | 1.43611E-04 | 1.47099E-04 | -3.4662E-02 | 6.1553E-03  |
| CCNA_00138 | 1.49579E-04 | 1.47099E-04 | 2.4079E-02  | 3.9654E-02  |
| CCNA_00139 | 1.13897E-04 | 9.85036E-05 | 2.0941E-01  | 1.4534E-01  |
| CCNA_00140 | 1.49149E-04 | 6.59467E-05 | 1.1772E+00  | 6.9728E-01  |
| CCNA_00141 | 4.00131E-05 | 1.46746E-04 | -1.8747E+00 | -1.0432E+00 |
| CCNA_00142 | 4.56261E-05 | 9.74379E-05 | -1.0946E+00 | -5.9833E-01 |
| CCNA_00143 | 3.56967E-04 | 1.11930E-04 | 1.6731E+00  | 9.8006E-01  |
| CCNA_00144 | 1.55345E-04 | 1.27946E-04 | 2.7989E-01  | 1.8554E-01  |
| CCNA_00145 | 2.19153E-04 | 1.07652E-04 | 1.0255E+00  | 6.1073E-01  |
| CCNA_00146 | 1.48423E-04 | 1.47346E-04 | 1.0462E-02  | 3.1889E-02  |
| CCNA_00147 | 4.25683E-05 | 7.71367E-05 | -8.5768E-01 | -4.6319E-01 |
| CCNA_00148 | 2.23135E-05 | 1.39976E-04 | -2.6491E+00 | -1.4848E+00 |
| CCNA_00149 | 2.50372E-05 | 1.47369E-04 | -2.5572E+00 | -1.4324E+00 |
| CCNA_00150 | 4.55148E-04 | 1.29484E-04 | 1.8135E+00  | 1.0601E+00  |
| CCNA_00151 | 1.44002E-04 | 6.12711E-05 | 1.2327E+00  | 7.2888E-01  |
| CCNA_00152 | 1.32337E-04 | 7.72943E-05 | 7.7567E-01  | 4.6827E-01  |
| CCNA_00153 | 4.69203E-05 | 1.33447E-04 | -1.5080E+00 | -8.3404E-01 |
| CCNA_00154 | 2.38818E-04 | 1.47662E-04 | 6.9356E-01  | 4.2144E-01  |
| CCNA_00155 | 2.42625E-04 | 1.47624E-04 | 7.1675E-01  | 4.3467E-01  |
| CCNA_00156 | 2.60364E-05 | 1.07427E-04 | -2.0447E+00 | -1.1401E+00 |

|            |             |             |             |             |
|------------|-------------|-------------|-------------|-------------|
| CCNA_00157 | 1.48655E-04 | 1.47414E-04 | 1.2052E-02  | 3.2795E-02  |
| CCNA_00158 | 1.00221E-04 | 1.10264E-04 | -1.3783E-01 | -5.2680E-02 |
| CCNA_00159 | 4.23026E-04 | 1.14512E-04 | 1.8852E+00  | 1.1010E+00  |
| CCNA_00160 | 1.34633E-04 | 1.47099E-04 | -1.2779E-01 | -4.6954E-02 |
| CCNA_00161 | 1.55538E-04 | 1.34941E-04 | 2.0489E-01  | 1.4277E-01  |
| CCNA_00162 | 1.41050E-04 | 1.46183E-04 | -5.1616E-02 | -3.5129E-03 |
| CCNA_00163 | 1.51234E-04 | 1.39346E-04 | 1.1807E-01  | 9.3252E-02  |
| CCNA_00164 | 1.24774E-04 | 8.17073E-05 | 6.1068E-01  | 3.7418E-01  |
| CCNA_00165 | 1.30790E-04 | 6.07833E-05 | 1.1054E+00  | 6.5628E-01  |
| CCNA_00166 | 5.64999E-05 | 1.41320E-05 | 1.9986E+00  | 1.1657E+00  |
| CCNA_00167 | 4.72513E-05 | 2.89094E-05 | 7.0853E-01  | 4.2998E-01  |
| CCNA_00168 | 1.47876E-04 | 1.47039E-04 | 8.1442E-03  | 3.0567E-02  |
| CCNA_00169 | 8.93381E-05 | 1.60458E-05 | 2.4765E+00  | 1.4382E+00  |
| CCNA_00170 | 8.35716E-05 | 1.46641E-04 | -8.1122E-01 | -4.3670E-01 |
| CCNA_00171 | 6.91645E-05 | 9.01505E-05 | -3.8236E-01 | -1.9213E-01 |
| CCNA_00172 | 2.43570E-05 | 1.47076E-04 | -2.5941E+00 | -1.4534E+00 |
| CCNA_00173 | 5.74510E-05 | 1.47429E-04 | -1.3596E+00 | -7.4943E-01 |
| CCNA_00174 | 3.24168E-05 | 1.28208E-04 | -1.9836E+00 | -1.1053E+00 |
| CCNA_00175 | 2.27468E-05 | 1.42806E-04 | -2.6502E+00 | -1.4854E+00 |
| CCNA_00176 | 6.20949E-05 | 1.39361E-04 | -1.1663E+00 | -6.3919E-01 |
| CCNA_00177 | 1.28313E-04 | 1.46040E-04 | -1.8674E-01 | -8.0572E-02 |
| CCNA_00178 | 6.46711E-05 | 6.93315E-05 | -1.0048E-01 | -3.1378E-02 |
| CCNA_00179 | 1.82306E-04 | 1.01401E-04 | 8.4621E-01  | 5.0850E-01  |
| CCNA_00180 | 3.41233E-05 | 8.28331E-05 | -1.2795E+00 | -7.0372E-01 |
| CCNA_00181 | 1.66776E-04 | 9.76705E-05 | 7.7183E-01  | 4.6608E-01  |
| CCNA_00182 | 2.18018E-04 | 9.94792E-05 | 1.1319E+00  | 6.7142E-01  |
| CCNA_00183 | 2.24964E-04 | 1.47099E-04 | 6.1286E-01  | 3.7542E-01  |
| CCNA_00184 | 7.73778E-05 | 1.01633E-04 | -3.9343E-01 | -1.9844E-01 |
| CCNA_00185 | 2.10705E-04 | 9.63646E-05 | 1.1286E+00  | 6.6951E-01  |
| CCNA_00186 | 1.35545E-04 | 1.44277E-04 | -9.0109E-02 | -2.5465E-02 |
| CCNA_00187 | 1.70947E-05 | 1.48750E-04 | -3.1211E+00 | -1.7540E+00 |
| CCNA_00188 | 5.13294E-05 | 1.22595E-04 | -1.2560E+00 | -6.9037E-01 |
| CCNA_00189 | 1.36893E-04 | 1.42881E-04 | -6.1804E-02 | -9.3228E-03 |
| CCNA_00190 | 2.18560E-05 | 4.21258E-05 | -9.4673E-01 | -5.1398E-01 |
| CCNA_00191 | 1.34913E-04 | 1.04725E-04 | 3.6535E-01  | 2.3427E-01  |
| CCNA_00192 | 2.90611E-05 | 1.26205E-04 | -2.1185E+00 | -1.1822E+00 |
| CCNA_00193 | 1.13283E-04 | 1.11720E-04 | 1.9983E-02  | 3.7318E-02  |
| CCNA_00194 | 3.21189E-05 | 1.14302E-04 | -1.8313E+00 | -1.0184E+00 |
| CCNA_00195 | 9.46290E-05 | 9.65523E-05 | -2.9093E-02 | 9.3312E-03  |
| CCNA_00196 | 2.64908E-05 | 1.47099E-04 | -2.4731E+00 | -1.3844E+00 |
| CCNA_00197 | 1.39518E-04 | 1.02361E-04 | 4.4671E-01  | 2.8067E-01  |
| CCNA_00198 | 1.32978E-04 | 1.47099E-04 | -1.4564E-01 | -5.7132E-02 |
| CCNA_00199 | 1.46205E-04 | 1.47099E-04 | -8.8333E-03 | 2.0885E-02  |
| CCNA_00200 | 1.01596E-04 | 7.97710E-05 | 3.4882E-01  | 2.2485E-01  |
| CCNA_00201 | 1.16353E-04 | 1.04102E-04 | 1.6043E-01  | 1.1741E-01  |
| CCNA_00202 | 1.58319E-04 | 1.40764E-04 | 1.6950E-01  | 1.2259E-01  |
| CCNA_00203 | 2.37057E-04 | 1.47399E-04 | 6.8545E-01  | 4.1682E-01  |
| CCNA_00204 | 4.68330E-05 | 1.46866E-04 | -1.6489E+00 | -9.1440E-01 |
| CCNA_00205 | 9.28443E-05 | 1.46070E-04 | -6.5381E-01 | -3.4693E-01 |
| CCNA_00206 | 5.44504E-05 | 1.39001E-04 | -1.3521E+00 | -7.4514E-01 |
| CCNA_00207 | 1.06135E-04 | 1.35181E-04 | -3.4903E-01 | -1.7312E-01 |
| CCNA_00208 | 7.40190E-05 | 9.20567E-05 | -3.1469E-01 | -1.5354E-01 |
| CCNA_00209 | 1.77180E-04 | 1.22445E-04 | 5.3303E-01  | 3.2989E-01  |

|            |             |             |             |             |
|------------|-------------|-------------|-------------|-------------|
| CCNA_00210 | 7.92799E-05 | 9.92991E-05 | -3.2488E-01 | -1.5935E-01 |
| CCNA_00211 | 2.73275E-05 | 1.37815E-04 | -2.3342E+00 | -1.3052E+00 |
| CCNA_00212 | 1.71835E-04 | 1.48329E-04 | 2.1217E-01  | 1.4692E-01  |
| CCNA_00213 | 1.60925E-05 | 9.99520E-05 | -2.6347E+00 | -1.4766E+00 |
| CCNA_00214 | 2.29094E-05 | 1.47099E-04 | -2.6827E+00 | -1.5039E+00 |
| CCNA_00215 | 1.38344E-04 | 8.84919E-05 | 6.4455E-01  | 3.9350E-01  |
| CCNA_00216 | 2.69278E-04 | 1.47692E-04 | 8.6645E-01  | 5.2004E-01  |
| CCNA_00217 | 2.84558E-04 | 1.33379E-04 | 1.0931E+00  | 6.4931E-01  |
| CCNA_00218 | 2.24152E-04 | 1.18017E-04 | 9.2541E-01  | 5.5366E-01  |
| CCNA_00219 | 2.23622E-04 | 1.43121E-04 | 6.4377E-01  | 3.9305E-01  |
| CCNA_00220 | 1.60465E-04 | 1.46701E-04 | 1.2933E-01  | 9.9678E-02  |
| CCNA_00221 | 1.95807E-05 | 9.33551E-05 | -2.2532E+00 | -1.2590E+00 |
| CCNA_00222 | 1.86026E-05 | 7.96359E-05 | -2.0978E+00 | -1.1704E+00 |
| CCNA_00223 | 6.93601E-05 | 1.13619E-04 | -7.1205E-01 | -3.8015E-01 |
| CCNA_00224 | 2.60063E-05 | 5.81790E-05 | -1.1617E+00 | -6.3655E-01 |
| CCNA_00225 | 2.53562E-05 | 4.07748E-05 | -6.8544E-01 | -3.6497E-01 |
| CCNA_00226 | 2.83147E-05 | 1.45913E-04 | -2.3654E+00 | -1.3230E+00 |
| CCNA_00227 | 2.88143E-05 | 1.47376E-04 | -2.3546E+00 | -1.3168E+00 |
| CCNA_00228 | 1.58677E-04 | 8.32608E-05 | 9.3028E-01  | 5.5644E-01  |
| CCNA_00229 | 1.62593E-04 | 1.44817E-04 | 1.6698E-01  | 1.2115E-01  |
| CCNA_00230 | 3.10926E-05 | 7.25211E-05 | -1.2218E+00 | -6.7087E-01 |
| CCNA_00231 | 2.27167E-05 | 8.66231E-05 | -1.9309E+00 | -1.0752E+00 |
| CCNA_00232 | 1.47930E-04 | 9.89163E-05 | 5.8055E-01  | 3.5700E-01  |
| CCNA_00233 | 1.80584E-04 | 1.29192E-04 | 4.8310E-01  | 3.0142E-01  |
| CCNA_00234 | 2.40139E-05 | 1.32817E-04 | -2.4674E+00 | -1.3812E+00 |
| CCNA_00235 | 5.01075E-05 | 1.40262E-04 | -1.4850E+00 | -8.2095E-01 |
| CCNA_00236 | 3.89026E-05 | 1.26385E-04 | -1.6999E+00 | -9.4347E-01 |
| CCNA_00237 | 3.87762E-05 | 1.25874E-04 | -1.6987E+00 | -9.4282E-01 |
| CCNA_00238 | 1.34296E-04 | 1.47099E-04 | -1.3141E-01 | -4.9017E-02 |
| CCNA_00239 | 2.47121E-05 | 1.26910E-04 | -2.3604E+00 | -1.3202E+00 |
| CCNA_00240 | 1.11179E-04 | 1.47016E-04 | -4.0312E-01 | -2.0397E-01 |
| CCNA_00241 | 5.99369E-05 | 1.42708E-04 | -1.2516E+00 | -6.8781E-01 |
| CCNA_00242 | 1.69175E-04 | 8.41464E-05 | 1.0074E+00  | 6.0044E-01  |
| CCNA_00243 | 1.27636E-04 | 1.09146E-04 | 2.2571E-01  | 1.5464E-01  |
| CCNA_00244 | 1.56880E-04 | 8.88371E-05 | 8.2034E-01  | 4.9374E-01  |
| CCNA_00245 | 1.62460E-04 | 1.31150E-04 | 3.0881E-01  | 2.0203E-01  |
| CCNA_00246 | 8.62141E-05 | 9.56216E-05 | -1.4948E-01 | -5.9321E-02 |
| CCNA_00247 | 1.12422E-04 | 7.25211E-05 | 6.3234E-01  | 3.8653E-01  |
| CCNA_00248 | 6.85686E-05 | 1.21889E-04 | -8.2998E-01 | -4.4739E-01 |
| CCNA_00249 | 7.18641E-05 | 1.26040E-04 | -8.1056E-01 | -4.3632E-01 |
| CCNA_00250 | 7.96440E-05 | 1.19870E-04 | -5.8987E-01 | -3.1047E-01 |
| CCNA_00251 | 9.75695E-05 | 1.25034E-04 | -3.5786E-01 | -1.7816E-01 |
| CCNA_00252 | 2.64969E-05 | 8.77113E-05 | -1.7269E+00 | -9.5889E-01 |
| CCNA_00253 | 2.37912E-05 | 1.23510E-04 | -2.3760E+00 | -1.3291E+00 |
| CCNA_00254 | 1.13990E-04 | 1.47099E-04 | -3.6791E-01 | -1.8389E-01 |
| CCNA_00255 | 3.41413E-05 | 9.83835E-05 | -1.5269E+00 | -8.4482E-01 |
| CCNA_00256 | 1.03303E-04 | 1.46003E-04 | -4.9915E-01 | -2.5873E-01 |
| CCNA_00257 | 9.36629E-05 | 1.47504E-04 | -6.5523E-01 | -3.4774E-01 |
| CCNA_00258 | 1.37655E-04 | 1.35368E-04 | 2.4117E-02  | 3.9676E-02  |
| CCNA_00259 | 4.84221E-05 | 1.45620E-04 | -1.5885E+00 | -8.7994E-01 |
| CCNA_00260 | 3.01352E-04 | 1.47099E-04 | 1.0346E+00  | 6.1594E-01  |
| CCNA_00261 | 2.65715E-04 | 1.37657E-04 | 9.4874E-01  | 5.6696E-01  |
| CCNA_00262 | 2.02097E-05 | 9.47210E-05 | -2.2285E+00 | -1.2450E+00 |

|            |             |             |             |             |
|------------|-------------|-------------|-------------|-------------|
| CCNA_00263 | 2.41915E-05 | 8.94375E-05 | -1.8863E+00 | -1.0498E+00 |
| CCNA_00264 | 7.46902E-05 | 1.38168E-04 | -8.8745E-01 | -4.8017E-01 |
| CCNA_00265 | 5.76707E-05 | 7.41197E-05 | -3.6209E-01 | -1.8057E-01 |
| CCNA_00266 | 5.03091E-05 | 1.22242E-04 | -1.2809E+00 | -7.0452E-01 |
| CCNA_00267 | 4.97638E-04 | 1.46971E-04 | 1.7595E+00  | 1.0293E+00  |
| CCNA_00268 | 4.91594E-04 | 1.45680E-04 | 1.7546E+00  | 1.0265E+00  |
| CCNA_00269 | 1.22152E-04 | 1.32734E-04 | -1.1990E-01 | -4.2457E-02 |
| CCNA_00270 | 3.25372E-05 | 9.81208E-05 | -1.5924E+00 | -8.8221E-01 |
| CCNA_00271 | 3.27358E-05 | 1.47099E-04 | -2.1678E+00 | -1.2103E+00 |
| CCNA_00272 | 2.00803E-05 | 8.28030E-05 | -2.0438E+00 | -1.1396E+00 |
| CCNA_00273 | 1.53609E-04 | 1.05641E-04 | 5.4002E-01  | 3.3388E-01  |
| CCNA_00274 | 2.70446E-05 | 1.04140E-04 | -1.9451E+00 | -1.0833E+00 |
| CCNA_00275 | 2.78244E-04 | 1.37425E-04 | 1.0176E+00  | 6.0626E-01  |
| CCNA_00276 | 3.32715E-05 | 7.95083E-05 | -1.2568E+00 | -6.9082E-01 |
| CCNA_00277 | 5.11909E-05 | 1.47024E-04 | -1.5221E+00 | -8.4208E-01 |
| CCNA_00278 | 4.86327E-05 | 7.98986E-05 | -7.1629E-01 | -3.8256E-01 |
| CCNA_00279 | 6.33168E-05 | 1.48187E-04 | -1.2268E+00 | -6.7367E-01 |
| CCNA_00280 | 2.11277E-05 | 1.02751E-04 | -2.2819E+00 | -1.2754E+00 |
| CCNA_00281 | 1.07673E-04 | 1.08485E-04 | -1.0905E-02 | 1.9704E-02  |
| CCNA_00282 | 1.07221E-04 | 1.08725E-04 | -2.0156E-02 | 1.4428E-02  |
| CCNA_00283 | 1.55574E-04 | 1.08305E-04 | 5.2243E-01  | 3.2385E-01  |
| CCNA_00284 | 1.62845E-04 | 1.21394E-04 | 4.2375E-01  | 2.6757E-01  |
| CCNA_00285 | 3.17998E-05 | 4.65687E-05 | -5.5044E-01 | -2.8798E-01 |
| CCNA_00286 | 7.24269E-05 | 1.22272E-04 | -7.5552E-01 | -4.0494E-01 |
| CCNA_00287 | 3.35918E-04 | 1.15570E-04 | 1.5393E+00  | 9.0373E-01  |
| CCNA_00288 | 5.51968E-05 | 5.40588E-05 | 2.9934E-02  | 4.2993E-02  |
| CCNA_00289 | 1.28406E-04 | 1.21544E-04 | 7.9181E-02  | 7.1077E-02  |
| CCNA_00290 | 3.42018E-04 | 1.02121E-04 | 1.7437E+00  | 1.0203E+00  |
| CCNA_00291 | 5.60587E-04 | 1.35699E-04 | 2.0465E+00  | 1.1930E+00  |
| CCNA_00292 | 6.66003E-05 | 7.38420E-05 | -1.4900E-01 | -5.9046E-02 |
| CCNA_00293 | 1.87786E-04 | 1.01498E-04 | 8.8756E-01  | 5.3208E-01  |
| CCNA_00294 | 1.18854E-04 | 1.12831E-04 | 7.4967E-02  | 6.8674E-02  |
| CCNA_00295 | 1.90968E-04 | 1.47099E-04 | 3.7649E-01  | 2.4063E-01  |
| CCNA_00296 | 1.47984E-04 | 1.00935E-04 | 5.5193E-01  | 3.4068E-01  |
| CCNA_00297 | 2.38661E-04 | 1.48352E-04 | 6.8589E-01  | 4.1707E-01  |
| CCNA_00298 | 9.49812E-05 | 2.31680E-05 | 2.0351E+00  | 1.1865E+00  |
| CCNA_00299 | 6.79185E-05 | 1.21184E-04 | -8.3535E-01 | -4.5046E-01 |
| CCNA_00300 | 2.42772E-04 | 8.87320E-05 | 1.4520E+00  | 8.5395E-01  |
| CCNA_00301 | 1.60351E-04 | 6.11810E-05 | 1.3899E+00  | 8.1856E-01  |
| CCNA_00302 | 5.98226E-05 | 1.60983E-05 | 1.8932E+00  | 1.1056E+00  |
| CCNA_00303 | 3.03040E-05 | 1.00170E-04 | -1.7248E+00 | -9.5771E-01 |
| CCNA_00304 | 9.82376E-05 | 1.27158E-04 | -3.7231E-01 | -1.8640E-01 |
| CCNA_00305 | 2.82063E-05 | 1.41372E-04 | -2.3253E+00 | -1.3002E+00 |
| CCNA_00306 | 3.95828E-05 | 1.18197E-04 | -1.5782E+00 | -8.7411E-01 |
| CCNA_00307 | 1.33824E-04 | 1.02992E-04 | 3.7773E-01  | 2.4134E-01  |
| CCNA_00308 | 1.39072E-04 | 1.09191E-04 | 3.4892E-01  | 2.2490E-01  |
| CCNA_00309 | 5.74630E-05 | 1.47099E-04 | -1.3561E+00 | -7.4742E-01 |
| CCNA_00310 | 4.84251E-05 | 8.94825E-05 | -8.8588E-01 | -4.7928E-01 |
| CCNA_00311 | 1.50822E-04 | 1.02924E-04 | 5.5119E-01  | 3.4025E-01  |
| CCNA_00312 | 7.01396E-05 | 5.68506E-05 | 3.0292E-01  | 1.9867E-01  |
| CCNA_00313 | 6.52309E-05 | 1.22219E-04 | -9.0587E-01 | -4.9067E-01 |
| CCNA_00314 | 4.68330E-05 | 1.47399E-04 | -1.6541E+00 | -9.1738E-01 |
| CCNA_00315 | 2.48807E-05 | 1.40382E-04 | -2.4962E+00 | -1.3976E+00 |

|            |             |             |             |             |
|------------|-------------|-------------|-------------|-------------|
| CCNA_00316 | 6.64287E-05 | 1.10159E-04 | -7.2974E-01 | -3.9023E-01 |
| CCNA_00317 | 1.30910E-04 | 1.22985E-04 | 9.0041E-02  | 7.7271E-02  |
| CCNA_00318 | 1.24301E-04 | 8.63604E-05 | 5.2531E-01  | 3.2549E-01  |
| CCNA_00319 | 1.87073E-04 | 1.24876E-04 | 5.8304E-01  | 3.5842E-01  |
| CCNA_00320 | 3.18188E-04 | 1.47624E-04 | 1.1079E+00  | 6.5773E-01  |
| CCNA_00321 | 3.34720E-04 | 9.83760E-05 | 1.7665E+00  | 1.0333E+00  |
| CCNA_00322 | 3.37892E-04 | 1.00823E-04 | 1.7446E+00  | 1.0209E+00  |
| CCNA_00323 | 4.15661E-05 | 1.46956E-04 | -1.8219E+00 | -1.0131E+00 |
| CCNA_00324 | 2.56216E-04 | 9.86612E-05 | 1.3767E+00  | 8.1103E-01  |
| CCNA_00325 | 3.41477E-04 | 1.45072E-04 | 1.2350E+00  | 7.3019E-01  |
| CCNA_00326 | 3.02496E-04 | 1.20531E-04 | 1.3274E+00  | 7.8293E-01  |
| CCNA_00327 | 1.03197E-04 | 9.95993E-05 | 5.1134E-02  | 5.5083E-02  |
| CCNA_00328 | 8.27741E-05 | 6.60143E-05 | 3.2629E-01  | 2.1200E-01  |
| CCNA_00329 | 1.29553E-04 | 1.46828E-04 | -1.8063E-01 | -7.7087E-02 |
| CCNA_00330 | 2.32073E-04 | 7.34743E-05 | 1.6591E+00  | 9.7209E-01  |
| CCNA_00331 | 2.15899E-04 | 5.37210E-05 | 2.0066E+00  | 1.1703E+00  |
| CCNA_00332 | 2.05167E-05 | 1.49193E-04 | -2.8622E+00 | -1.6063E+00 |
| CCNA_00333 | 2.43480E-05 | 8.55724E-05 | -1.8133E+00 | -1.0082E+00 |
| CCNA_00334 | 2.14647E-05 | 1.48690E-04 | -2.7921E+00 | -1.5664E+00 |
| CCNA_00335 | 3.26877E-05 | 1.19930E-04 | -1.8753E+00 | -1.0435E+00 |
| CCNA_00336 | 4.50212E-05 | 1.47429E-04 | -1.7113E+00 | -9.5001E-01 |
| CCNA_00337 | 2.25723E-05 | 8.55199E-05 | -1.9216E+00 | -1.0699E+00 |
| CCNA_00338 | 2.88961E-04 | 1.46288E-04 | 9.8201E-01  | 5.8594E-01  |
| CCNA_00339 | 4.84823E-05 | 1.08620E-04 | -1.1638E+00 | -6.3775E-01 |
| CCNA_00340 | 1.18869E-04 | 9.33776E-05 | 3.4814E-01  | 2.2446E-01  |
| CCNA_00341 | 7.32636E-05 | 1.33732E-04 | -8.6820E-01 | -4.6919E-01 |
| CCNA_00342 | 3.54897E-05 | 1.37635E-04 | -1.9553E+00 | -1.0892E+00 |
| CCNA_00343 | 2.17549E-04 | 1.31353E-04 | 7.2783E-01  | 4.4098E-01  |
| CCNA_00344 | 2.29816E-05 | 1.03817E-04 | -2.1754E+00 | -1.2147E+00 |
| CCNA_00345 | 5.49560E-05 | 1.01866E-04 | -8.9035E-01 | -4.8182E-01 |
| CCNA_00346 | 8.70989E-05 | 1.45470E-04 | -7.4002E-01 | -3.9609E-01 |
| CCNA_00347 | 1.11098E-04 | 1.21552E-04 | -1.2979E-01 | -4.8093E-02 |
| CCNA_00348 | 7.93010E-05 | 1.18805E-04 | -5.8322E-01 | -3.0667E-01 |
| CCNA_00349 | 9.10145E-05 | 1.47309E-04 | -6.9470E-01 | -3.7025E-01 |
| CCNA_00350 | 2.16444E-04 | 1.11367E-04 | 9.5859E-01  | 5.7259E-01  |
| CCNA_00351 | 2.18978E-04 | 1.37687E-04 | 6.6933E-01  | 4.0763E-01  |
| CCNA_00352 | 5.49229E-05 | 1.37169E-04 | -1.3205E+00 | -7.2712E-01 |
| CCNA_00353 | 3.91524E-05 | 1.47099E-04 | -1.9096E+00 | -1.0631E+00 |
| CCNA_00354 | 4.41424E-05 | 1.47894E-04 | -1.7443E+00 | -9.6882E-01 |
| CCNA_00355 | 1.44755E-04 | 9.30849E-05 | 6.3690E-01  | 3.8913E-01  |
| CCNA_00356 | 1.21030E-04 | 1.46633E-04 | -2.7689E-01 | -1.3198E-01 |
| CCNA_00357 | 3.28156E-04 | 8.61728E-05 | 1.9290E+00  | 1.1260E+00  |
| CCNA_00358 | 3.32475E-05 | 9.01955E-05 | -1.4398E+00 | -7.9516E-01 |
| CCNA_00359 | 3.00723E-05 | 1.47099E-04 | -2.2902E+00 | -1.2801E+00 |
| CCNA_00360 | 4.81301E-05 | 1.30340E-04 | -1.4373E+00 | -7.9371E-01 |
| CCNA_00361 | 1.52176E-04 | 1.17506E-04 | 3.7294E-01  | 2.3860E-01  |
| CCNA_00362 | 2.65239E-05 | 4.38669E-05 | -7.2592E-01 | -3.8805E-01 |
| CCNA_00363 | 4.84341E-05 | 1.42851E-04 | -1.5604E+00 | -8.6394E-01 |
| CCNA_00364 | 5.28312E-05 | 1.16936E-04 | -1.1463E+00 | -6.2777E-01 |
| CCNA_00365 | 5.10314E-05 | 7.83300E-05 | -6.1823E-01 | -3.2664E-01 |
| CCNA_00366 | 1.34152E-04 | 1.47076E-04 | -1.3274E-01 | -4.9776E-02 |
| CCNA_00367 | 3.83362E-04 | 7.98160E-05 | 2.2638E+00  | 1.3169E+00  |
| CCNA_00368 | 1.24238E-04 | 9.18241E-05 | 4.3608E-01  | 2.7461E-01  |

|            |             |             |             |             |
|------------|-------------|-------------|-------------|-------------|
| CCNA_00369 | 3.37365E-04 | 6.65171E-05 | 2.3424E+00  | 1.3617E+00  |
| CCNA_00370 | 4.42658E-05 | 1.42828E-04 | -1.6900E+00 | -9.3784E-01 |
| CCNA_00371 | 7.34833E-05 | 1.45410E-04 | -9.8465E-01 | -5.3560E-01 |
| CCNA_00372 | 2.11111E-04 | 9.98995E-05 | 1.0794E+00  | 6.4146E-01  |
| CCNA_00373 | 7.95357E-05 | 1.14729E-04 | -5.2860E-01 | -2.7553E-01 |
| CCNA_00374 | 1.35058E-04 | 1.47174E-04 | -1.2399E-01 | -4.4785E-02 |
| CCNA_00375 | 4.36458E-04 | 8.31107E-05 | 2.3926E+00  | 1.3904E+00  |
| CCNA_00376 | 1.09099E-04 | 1.31676E-04 | -2.7139E-01 | -1.2885E-01 |
| CCNA_00377 | 2.59882E-05 | 1.39526E-04 | -2.4245E+00 | -1.3567E+00 |
| CCNA_00378 | 4.97132E-05 | 8.97302E-05 | -8.5200E-01 | -4.5995E-01 |
| CCNA_00379 | 3.82468E-04 | 7.08325E-05 | 2.4327E+00  | 1.4132E+00  |
| CCNA_00380 | 1.98666E-05 | 1.10211E-04 | -2.4717E+00 | -1.3837E+00 |
| CCNA_00381 | 1.77719E-05 | 3.94765E-05 | -1.1514E+00 | -6.3071E-01 |
| CCNA_00382 | 5.31210E-04 | 1.25342E-04 | 2.0833E+00  | 1.2140E+00  |
| CCNA_00383 | 1.38516E-04 | 5.48768E-05 | 1.3356E+00  | 7.8759E-01  |
| CCNA_00384 | 2.25338E-04 | 6.83033E-05 | 1.7219E+00  | 1.0079E+00  |
| CCNA_00385 | 1.38329E-04 | 1.47632E-04 | -9.3939E-02 | -2.7649E-02 |
| CCNA_00386 | 2.07716E-04 | 1.47099E-04 | 4.9778E-01  | 3.0979E-01  |
| CCNA_00387 | 1.72771E-04 | 1.24141E-04 | 4.7682E-01  | 2.9784E-01  |
| CCNA_00388 | 1.33667E-04 | 2.58398E-05 | 2.3706E+00  | 1.3778E+00  |
| CCNA_00389 | 3.79338E-04 | 1.28381E-04 | 1.5630E+00  | 9.1725E-01  |
| CCNA_00390 | 3.52155E-04 | 1.47099E-04 | 1.2594E+00  | 7.4411E-01  |
| CCNA_00391 | 7.55088E-05 | 1.13258E-04 | -5.8494E-01 | -3.0766E-01 |
| CCNA_00392 | 1.38558E-04 | 1.09754E-04 | 3.3615E-01  | 2.1762E-01  |
| CCNA_00393 | 4.83920E-05 | 5.52446E-05 | -1.9117E-01 | -8.3098E-02 |
| CCNA_00394 | 9.86559E-05 | 8.71935E-05 | 1.7811E-01  | 1.2749E-01  |
| CCNA_00395 | 1.24226E-04 | 1.47099E-04 | -2.4386E-01 | -1.1314E-01 |
| CCNA_00396 | 4.96109E-05 | 7.84351E-05 | -6.6089E-01 | -3.5097E-01 |
| CCNA_00397 | 5.97082E-05 | 1.07344E-04 | -8.4628E-01 | -4.5669E-01 |
| CCNA_00398 | 4.16555E-04 | 1.01633E-04 | 2.0350E+00  | 1.1865E+00  |
| CCNA_00399 | 2.68342E-04 | 8.88371E-05 | 1.5947E+00  | 9.3536E-01  |
| CCNA_00400 | 5.38484E-05 | 1.21184E-04 | -1.1702E+00 | -6.4143E-01 |
| CCNA_00401 | 6.63174E-05 | 7.87053E-05 | -2.4715E-01 | -1.1502E-01 |
| CCNA_00402 | 6.03613E-05 | 1.10407E-04 | -8.7116E-01 | -4.7088E-01 |
| CCNA_00403 | 2.61628E-05 | 4.83174E-05 | -8.8509E-01 | -4.7882E-01 |
| CCNA_00404 | 1.83142E-04 | 8.56700E-05 | 1.0960E+00  | 6.5095E-01  |
| CCNA_00405 | 1.38001E-04 | 9.51263E-05 | 5.3668E-01  | 3.3198E-01  |
| CCNA_00406 | 1.26441E-04 | 9.07434E-05 | 4.7851E-01  | 2.9881E-01  |
| CCNA_00407 | 1.71140E-04 | 1.46911E-04 | 2.2019E-01  | 1.5149E-01  |
| CCNA_00408 | 7.33629E-05 | 7.92682E-05 | -1.1177E-01 | -3.7816E-02 |
| CCNA_00409 | 1.75122E-04 | 1.43459E-04 | 2.8767E-01  | 1.8998E-01  |
| CCNA_00410 | 8.86519E-05 | 7.63037E-05 | 2.1631E-01  | 1.4928E-01  |
| CCNA_00411 | 3.41112E-05 | 6.19465E-05 | -8.6082E-01 | -4.6499E-01 |
| CCNA_00412 | 1.50431E-04 | 6.95341E-05 | 1.1132E+00  | 6.6074E-01  |
| CCNA_00413 | 2.03211E-04 | 1.11427E-04 | 8.6680E-01  | 5.2024E-01  |
| CCNA_00414 | 1.66839E-04 | 1.44494E-04 | 2.0740E-01  | 1.4420E-01  |
| CCNA_00415 | 1.91392E-04 | 8.99628E-05 | 1.0890E+00  | 6.4697E-01  |
| CCNA_00416 | 8.47484E-05 | 1.08800E-04 | -3.6048E-01 | -1.7965E-01 |
| CCNA_00417 | 4.63063E-05 | 5.51395E-05 | -2.5198E-01 | -1.1778E-01 |
| CCNA_00418 | 5.10104E-05 | 1.41770E-04 | -1.4747E+00 | -8.1506E-01 |
| CCNA_00419 | 4.85816E-05 | 6.23368E-05 | -3.5976E-01 | -1.7924E-01 |
| CCNA_00420 | 5.78483E-05 | 6.88212E-05 | -2.5066E-01 | -1.1702E-01 |
| CCNA_00421 | 3.89808E-05 | 7.78947E-05 | -9.9879E-01 | -5.4366E-01 |



|            |             |             |             |             |
|------------|-------------|-------------|-------------|-------------|
| CCNA_00422 | 2.58137E-05 | 6.63670E-05 | -1.3623E+00 | -7.5098E-01 |
| CCNA_00423 | 2.91002E-05 | 1.15585E-04 | -1.9898E+00 | -1.1088E+00 |
| CCNA_00424 | 5.56211E-05 | 1.45905E-04 | -1.3913E+00 | -7.6752E-01 |
| CCNA_00425 | 1.52044E-04 | 1.24741E-04 | 2.8549E-01  | 1.8873E-01  |
| CCNA_00426 | 3.63655E-04 | 7.06599E-05 | 2.3635E+00  | 1.3738E+00  |
| CCNA_00427 | 1.68452E-04 | 1.44810E-04 | 2.1813E-01  | 1.5032E-01  |
| CCNA_00428 | 1.66304E-04 | 5.11243E-05 | 1.7016E+00  | 9.9628E-01  |
| CCNA_00429 | 2.51407E-04 | 1.10377E-04 | 1.1875E+00  | 7.0313E-01  |
| CCNA_00430 | 2.58919E-05 | 8.72760E-05 | -1.7530E+00 | -9.7380E-01 |
| CCNA_00431 | 7.02841E-05 | 6.82283E-05 | 4.2732E-02  | 5.0291E-02  |
| CCNA_00432 | 1.30651E-04 | 1.30723E-04 | -8.3649E-04 | 2.5445E-02  |
| CCNA_00433 | 1.32876E-04 | 1.47099E-04 | -1.4675E-01 | -5.7766E-02 |
| CCNA_00434 | 4.90872E-05 | 3.03879E-05 | 6.9158E-01  | 4.2032E-01  |
| CCNA_00435 | 3.63655E-05 | 1.47099E-04 | -2.0161E+00 | -1.1238E+00 |
| CCNA_00436 | 2.30990E-05 | 1.47054E-04 | -2.6703E+00 | -1.4969E+00 |
| CCNA_00437 | 2.82274E-05 | 8.10844E-05 | -1.5223E+00 | -8.4222E-01 |
| CCNA_00438 | 1.03668E-03 | 1.47099E-04 | 2.8170E+00  | 1.6324E+00  |
| CCNA_00439 | 9.97581E-04 | 1.43316E-04 | 2.7992E+00  | 1.6222E+00  |
| CCNA_00440 | 4.04586E-05 | 1.47414E-04 | -1.8653E+00 | -1.0378E+00 |
| CCNA_00441 | 2.17588E-04 | 8.62629E-05 | 1.3347E+00  | 7.8706E-01  |
| CCNA_00442 | 8.42789E-05 | 8.16247E-05 | 4.6084E-02  | 5.2203E-02  |
| CCNA_00443 | 8.47333E-05 | 1.47099E-04 | -7.9580E-01 | -4.2791E-01 |
| CCNA_00444 | 5.98045E-05 | 1.47624E-04 | -1.3036E+00 | -7.1749E-01 |
| CCNA_00445 | 3.17685E-04 | 1.45515E-04 | 1.1264E+00  | 6.6827E-01  |
| CCNA_00446 | 1.83651E-04 | 1.47384E-04 | 3.1734E-01  | 2.0689E-01  |
| CCNA_00447 | 1.43518E-04 | 1.30865E-04 | 1.3309E-01  | 1.0182E-01  |
| CCNA_00448 | 1.50852E-04 | 1.07960E-04 | 4.8257E-01  | 3.0112E-01  |
| CCNA_00449 | 4.97523E-05 | 1.27083E-04 | -1.3529E+00 | -7.4562E-01 |
| CCNA_00450 | 2.21413E-04 | 1.45260E-04 | 6.0805E-01  | 3.7268E-01  |
| CCNA_00451 | 2.42784E-04 | 1.17229E-04 | 1.0503E+00  | 6.2487E-01  |
| CCNA_00452 | 2.80679E-05 | 1.47099E-04 | -2.3897E+00 | -1.3369E+00 |
| CCNA_00453 | 1.70234E-04 | 1.47887E-04 | 2.0298E-01  | 1.4168E-01  |
| CCNA_00454 | 1.84521E-04 | 5.25578E-05 | 1.8116E+00  | 1.0591E+00  |
| CCNA_00455 | 1.83118E-04 | 5.27003E-05 | 1.7967E+00  | 1.0505E+00  |
| CCNA_00456 | 9.73076E-05 | 7.94708E-05 | 2.9204E-01  | 1.9246E-01  |
| CCNA_00457 | 1.42205E-04 | 1.15382E-04 | 3.0149E-01  | 1.9786E-01  |
| CCNA_00458 | 6.59502E-05 | 1.12223E-04 | -7.6695E-01 | -4.1145E-01 |
| CCNA_00459 | 2.37852E-05 | 4.62160E-05 | -9.5838E-01 | -5.2062E-01 |
| CCNA_00460 | 3.21369E-05 | 9.61020E-05 | -1.5803E+00 | -8.7529E-01 |
| CCNA_04006 | 3.26543E-04 | 1.47504E-04 | 1.1465E+00  | 6.7972E-01  |
| CCNA_00464 | 6.39000E-04 | 1.32696E-04 | 2.2676E+00  | 1.3191E+00  |
| CCNA_00465 | 1.10980E-04 | 7.65964E-05 | 5.3485E-01  | 3.3094E-01  |
| CCNA_00466 | 2.35176E-04 | 6.02879E-05 | 1.9636E+00  | 1.1457E+00  |
| CCNA_00467 | 1.40255E-04 | 1.47099E-04 | -6.8773E-02 | -1.3297E-02 |
| CCNA_00468 | 4.60047E-04 | 1.47729E-04 | 1.6388E+00  | 9.6047E-01  |
| CCNA_00469 | 2.35763E-04 | 8.53322E-06 | 4.7869E+00  | 2.7558E+00  |
| CCNA_04002 | 2.33545E-04 | 9.62145E-06 | 4.6002E+00  | 2.6493E+00  |
| CCNA_00470 | 2.10648E-04 | 1.47099E-04 | 5.1799E-01  | 3.2132E-01  |
| CCNA_00471 | 1.00070E-04 | 1.47099E-04 | -5.5580E-01 | -2.9104E-01 |
| CCNA_00472 | 3.02210E-04 | 1.18805E-04 | 1.3469E+00  | 7.9402E-01  |
| CCNA_00473 | 3.21911E-05 | 7.22585E-05 | -1.1665E+00 | -6.3932E-01 |
| CCNA_00474 | 1.94423E-05 | 8.27280E-05 | -2.0891E+00 | -1.1654E+00 |
| CCNA_00475 | 1.47066E-04 | 1.18474E-04 | 3.1183E-01  | 2.0375E-01  |

|            |             |             |             |             |
|------------|-------------|-------------|-------------|-------------|
| CCNA_00476 | 4.97975E-05 | 8.77113E-05 | -8.1673E-01 | -4.3984E-01 |
| CCNA_00477 | 1.45982E-04 | 1.28088E-04 | 1.8860E-01  | 1.3348E-01  |
| CCNA_00478 | 4.00342E-05 | 1.00170E-04 | -1.3231E+00 | -7.2863E-01 |
| CCNA_00479 | 4.03382E-05 | 1.02699E-04 | -1.3482E+00 | -7.4293E-01 |
| CCNA_00480 | 1.03369E-04 | 9.35803E-05 | 1.4345E-01  | 1.0773E-01  |
| CCNA_00481 | 1.84572E-04 | 1.47406E-04 | 3.2434E-01  | 2.1088E-01  |
| CCNA_00482 | 5.57566E-05 | 7.74144E-05 | -4.7352E-01 | -2.4412E-01 |
| CCNA_00483 | 1.00257E-04 | 7.70917E-05 | 3.7896E-01  | 2.4203E-01  |
| CCNA_00484 | 3.87792E-05 | 1.44960E-04 | -1.9023E+00 | -1.0589E+00 |
| CCNA_00485 | 7.29326E-05 | 8.37637E-05 | -1.9983E-01 | -8.8037E-02 |
| CCNA_00486 | 7.63635E-05 | 5.58825E-05 | 4.5035E-01  | 2.8275E-01  |
| CCNA_00487 | 2.08207E-05 | 4.24410E-05 | -1.0275E+00 | -5.6003E-01 |
| CCNA_00488 | 1.41859E-04 | 1.47099E-04 | -5.2367E-02 | -3.9410E-03 |
| CCNA_00489 | 7.31733E-05 | 1.45875E-04 | -9.9536E-01 | -5.4171E-01 |
| CCNA_00490 | 8.55159E-05 | 1.09138E-04 | -3.5194E-01 | -1.7478E-01 |
| CCNA_00491 | 1.86974E-04 | 9.92165E-05 | 9.1410E-01  | 5.4721E-01  |
| CCNA_00492 | 1.86570E-04 | 9.84510E-05 | 9.2216E-01  | 5.5181E-01  |
| CCNA_00493 | 1.14730E-04 | 4.86026E-05 | 1.2390E+00  | 7.3247E-01  |
| CCNA_00494 | 7.25232E-05 | 9.75279E-05 | -4.2742E-01 | -2.1783E-01 |
| CCNA_00495 | 1.00459E-04 | 1.15532E-04 | -2.0175E-01 | -8.9129E-02 |
| CCNA_00496 | 3.69313E-05 | 1.39451E-04 | -1.9168E+00 | -1.0672E+00 |
| CCNA_00497 | 1.92295E-04 | 8.57300E-05 | 1.1653E+00  | 6.9049E-01  |
| CCNA_00498 | 7.35465E-05 | 1.47354E-04 | -1.0026E+00 | -5.4582E-01 |
| CCNA_00499 | 2.04806E-05 | 9.39480E-05 | -2.1975E+00 | -1.2273E+00 |
| CCNA_00500 | 4.68330E-05 | 8.12270E-05 | -7.9447E-01 | -4.2715E-01 |
| CCNA_00501 | 1.91723E-04 | 9.50963E-05 | 1.0115E+00  | 6.0274E-01  |
| CCNA_00502 | 2.20203E-04 | 1.47819E-04 | 5.7495E-01  | 3.5380E-01  |
| CCNA_00503 | 3.96279E-05 | 1.10226E-04 | -1.4759E+00 | -8.1573E-01 |
| CCNA_00504 | 2.72399E-04 | 8.06491E-05 | 1.7559E+00  | 1.0273E+00  |
| CCNA_00505 | 2.69796E-04 | 8.25404E-05 | 1.7086E+00  | 1.0003E+00  |
| CCNA_00506 | 1.51243E-04 | 1.29057E-04 | 2.2881E-01  | 1.5641E-01  |
| CCNA_00507 | 1.68970E-04 | 8.39738E-05 | 1.0087E+00  | 6.0113E-01  |
| CCNA_00508 | 2.41283E-05 | 1.47099E-04 | -2.6079E+00 | -1.4613E+00 |
| CCNA_00509 | 2.41584E-05 | 1.47099E-04 | -2.6061E+00 | -1.4603E+00 |
| CCNA_00510 | 2.05910E-04 | 8.40789E-05 | 1.2921E+00  | 7.6277E-01  |
| CCNA_00511 | 3.46018E-05 | 7.25361E-05 | -1.0679E+00 | -5.8306E-01 |
| CCNA_00512 | 3.62421E-05 | 1.28951E-04 | -1.8311E+00 | -1.0183E+00 |
| CCNA_00513 | 6.23296E-05 | 1.12928E-04 | -8.5744E-01 | -4.6306E-01 |
| CCNA_00514 | 5.52058E-05 | 8.25253E-05 | -5.8007E-01 | -3.0488E-01 |
| CCNA_00515 | 1.19558E-04 | 1.32044E-04 | -1.4335E-01 | -5.5827E-02 |
| CCNA_00516 | 3.05629E-05 | 1.00740E-04 | -1.7208E+00 | -9.5538E-01 |
| CCNA_00517 | 2.22924E-05 | 9.45034E-05 | -2.0837E+00 | -1.1624E+00 |
| CCNA_00518 | 8.73788E-05 | 1.43256E-04 | -7.1327E-01 | -3.8084E-01 |
| CCNA_00519 | 2.00285E-04 | 1.47099E-04 | 4.4522E-01  | 2.7982E-01  |
| CCNA_00520 | 8.51908E-05 | 1.16523E-04 | -4.5189E-01 | -2.3178E-01 |
| CCNA_00521 | 2.26213E-04 | 1.47099E-04 | 6.2085E-01  | 3.7998E-01  |
| CCNA_00522 | 6.48487E-05 | 9.27172E-05 | -5.1581E-01 | -2.6823E-01 |
| CCNA_00523 | 1.61897E-04 | 1.45763E-04 | 1.5141E-01  | 1.1227E-01  |
| CCNA_00524 | 2.81281E-05 | 1.46108E-04 | -2.3769E+00 | -1.3296E+00 |
| CCNA_00525 | 3.78582E-05 | 6.14212E-05 | -6.9819E-01 | -3.7224E-01 |
| CCNA_00526 | 2.92868E-05 | 7.30915E-05 | -1.3195E+00 | -7.2653E-01 |
| CCNA_00527 | 2.04998E-04 | 1.47099E-04 | 4.7878E-01  | 2.9896E-01  |
| CCNA_00528 | 4.67728E-05 | 1.09221E-04 | -1.2235E+00 | -6.7182E-01 |

|            |             |             |             |             |
|------------|-------------|-------------|-------------|-------------|
| CCNA_00529 | 1.56953E-05 | 3.73375E-05 | -1.2503E+00 | -6.8710E-01 |
| CCNA_00530 | 5.21796E-04 | 1.47024E-04 | 1.8274E+00  | 1.0680E+00  |
| CCNA_00531 | 8.09773E-05 | 1.46641E-04 | -8.5672E-01 | -4.6264E-01 |
| CCNA_00532 | 4.17888E-05 | 5.26553E-05 | -3.3356E-01 | -1.6430E-01 |
| CCNA_00533 | 1.83498E-04 | 1.39218E-04 | 3.9836E-01  | 2.5310E-01  |
| CCNA_00534 | 1.80151E-04 | 7.26712E-05 | 1.3096E+00  | 7.7277E-01  |
| CCNA_00535 | 1.39744E-04 | 9.94267E-05 | 4.9100E-01  | 3.0593E-01  |
| CCNA_00536 | 2.51383E-04 | 5.29705E-05 | 2.2464E+00  | 1.3070E+00  |
| CCNA_00537 | 1.49928E-04 | 9.61545E-05 | 6.4076E-01  | 3.9133E-01  |
| CCNA_00538 | 1.10333E-04 | 7.67540E-05 | 5.2345E-01  | 3.2444E-01  |
| CCNA_00539 | 2.66910E-04 | 6.07983E-05 | 2.1341E+00  | 1.2429E+00  |
| CCNA_00540 | 5.49108E-05 | 9.10436E-05 | -7.2951E-01 | -3.9010E-01 |
| CCNA_00541 | 5.37160E-05 | 8.31708E-05 | -6.3077E-01 | -3.3379E-01 |
| CCNA_00542 | 1.64573E-04 | 1.39601E-04 | 2.3737E-01  | 1.6129E-01  |
| CCNA_00543 | 3.15771E-05 | 1.07029E-04 | -1.7610E+00 | -9.7835E-01 |
| CCNA_00544 | 3.13394E-05 | 1.06669E-04 | -1.7671E+00 | -9.8179E-01 |
| CCNA_00545 | 1.06367E-04 | 1.05258E-04 | 1.5052E-02  | 3.4506E-02  |
| CCNA_00546 | 1.35687E-04 | 6.27871E-05 | 1.1116E+00  | 6.5984E-01  |
| CCNA_00547 | 5.30009E-04 | 1.73749E-04 | 1.6090E+00  | 9.4348E-01  |
| CCNA_00548 | 6.92006E-04 | 3.18191E-04 | 1.1209E+00  | 6.6513E-01  |
| CCNA_00549 | 4.95934E-04 | 6.69246E-04 | -4.3240E-01 | -2.2066E-01 |
| CCNA_00550 | 3.79594E-04 | 4.71699E-04 | -3.1342E-01 | -1.5282E-01 |
| CCNA_00551 | 3.38205E-04 | 1.44967E-04 | 1.2221E+00  | 7.2286E-01  |
| CCNA_00552 | 2.01414E-04 | 1.25964E-04 | 6.7708E-01  | 4.1205E-01  |
| CCNA_00553 | 1.87627E-04 | 9.30699E-05 | 1.0114E+00  | 6.0269E-01  |
| CCNA_00554 | 1.69882E-04 | 8.28406E-05 | 1.0360E+00  | 6.1674E-01  |
| CCNA_00555 | 1.26784E-04 | 1.31931E-04 | -5.7458E-02 | -6.8448E-03 |
| CCNA_00556 | 6.68019E-05 | 1.11930E-04 | -7.4467E-01 | -3.9874E-01 |
| CCNA_00557 | 2.04577E-04 | 1.29387E-04 | 6.6089E-01  | 4.0281E-01  |
| CCNA_00558 | 1.75913E-05 | 5.36760E-05 | -1.6094E+00 | -8.9186E-01 |
| CCNA_00559 | 1.32382E-04 | 1.35676E-04 | -3.5506E-02 | 5.6740E-03  |
| CCNA_00560 | 1.70505E-04 | 1.00808E-04 | 7.5813E-01  | 4.5827E-01  |
| CCNA_00561 | 1.20747E-04 | 5.69932E-05 | 1.0830E+00  | 6.4351E-01  |
| CCNA_00562 | 2.37280E-05 | 1.34115E-04 | -2.4987E+00 | -1.3990E+00 |
| CCNA_00563 | 1.10273E-05 | 9.22519E-05 | -3.0642E+00 | -1.7215E+00 |
| CCNA_00564 | 1.55306E-04 | 1.45868E-04 | 9.0409E-02  | 7.7481E-02  |
| CCNA_00565 | 2.81934E-04 | 1.41800E-04 | 9.9144E-01  | 5.9132E-01  |
| CCNA_00566 | 2.52328E-05 | 1.34986E-04 | -2.4193E+00 | -1.3538E+00 |
| CCNA_00567 | 1.33496E-04 | 8.75087E-05 | 6.0920E-01  | 3.7334E-01  |
| CCNA_00568 | 1.00799E-04 | 7.94633E-05 | 3.4302E-01  | 2.2154E-01  |
| CCNA_00569 | 2.19421E-04 | 6.28697E-05 | 1.8031E+00  | 1.0542E+00  |
| CCNA_00570 | 1.53365E-04 | 1.33590E-06 | 6.8350E+00  | 3.9237E+00  |
| CCNA_00571 | 2.27017E-04 | 2.94197E-06 | 6.2662E+00  | 3.5994E+00  |
| CCNA_00572 | 0.00000E+00 | 0.00000E+00 | -1.3183E+00 | -7.2586E-01 |
| CCNA_00573 | 2.29428E-04 | 1.20013E-04 | 9.3478E-01  | 5.5901E-01  |
| CCNA_00574 | 2.25663E-05 | 1.35398E-04 | -2.5849E+00 | -1.4482E+00 |
| CCNA_00575 | 6.69735E-05 | 1.47099E-04 | -1.1351E+00 | -6.2142E-01 |
| CCNA_00576 | 6.29165E-05 | 1.44742E-04 | -1.2020E+00 | -6.5954E-01 |
| CCNA_00577 | 1.17562E-04 | 9.87062E-05 | 2.5214E-01  | 1.6971E-01  |
| CCNA_00578 | 9.07225E-05 | 7.19207E-05 | 3.3495E-01  | 2.1694E-01  |
| CCNA_00579 | 1.74950E-05 | 5.36385E-05 | -1.6163E+00 | -8.9580E-01 |
| CCNA_00580 | 3.72834E-05 | 1.47099E-04 | -1.9801E+00 | -1.1033E+00 |
| CCNA_04005 | 3.52820E-05 | 1.50311E-04 | -2.0909E+00 | -1.1665E+00 |

|            |             |             |             |             |
|------------|-------------|-------------|-------------|-------------|
| CCNA_00582 | 1.02743E-04 | 1.19638E-04 | -2.1968E-01 | -9.9356E-02 |
| CCNA_00583 | 1.23296E-04 | 1.37725E-04 | -1.5971E-01 | -6.5156E-02 |
| CCNA_00584 | 2.26349E-04 | 1.11277E-04 | 1.0243E+00  | 6.1006E-01  |
| CCNA_00585 | 1.60408E-04 | 9.23569E-05 | 7.9636E-01  | 4.8007E-01  |
| CCNA_00586 | 2.25982E-04 | 1.10091E-04 | 1.0374E+00  | 6.1754E-01  |
| CCNA_00587 | 2.28934E-04 | 1.16658E-04 | 9.7257E-01  | 5.8056E-01  |
| CCNA_00588 | 1.37164E-04 | 1.37965E-04 | -8.4450E-03 | 2.1106E-02  |
| CCNA_00589 | 1.41965E-04 | 8.46868E-05 | 7.4523E-01  | 4.5091E-01  |
| CCNA_00590 | 1.32767E-04 | 9.29649E-05 | 5.1406E-01  | 3.1908E-01  |
| CCNA_00591 | 9.30610E-05 | 1.38130E-04 | -5.6981E-01 | -2.9903E-01 |
| CCNA_00592 | 8.14528E-05 | 1.23413E-04 | -5.9949E-01 | -3.1595E-01 |
| CCNA_00593 | 1.94061E-05 | 1.47099E-04 | -2.9220E+00 | -1.6405E+00 |
| CCNA_00594 | 1.57199E-04 | 1.09611E-04 | 5.2013E-01  | 3.2254E-01  |
| CCNA_00595 | 5.37846E-04 | 9.97794E-05 | 2.4303E+00  | 1.4119E+00  |
| CCNA_00596 | 7.46360E-05 | 9.54565E-05 | -3.5503E-01 | -1.7654E-01 |
| CCNA_00597 | 1.25944E-04 | 1.41582E-04 | -1.6890E-01 | -7.0397E-02 |
| CCNA_00598 | 1.75958E-04 | 6.75528E-05 | 1.3810E+00  | 8.1348E-01  |
| CCNA_00600 | 9.55981E-05 | 6.42356E-05 | 5.7349E-01  | 3.5297E-01  |
| CCNA_00601 | 2.15972E-05 | 7.79998E-05 | -1.8526E+00 | -1.0306E+00 |
| CCNA_00602 | 9.22574E-05 | 9.18616E-05 | 6.1324E-03  | 2.9420E-02  |
| CCNA_00603 | 3.23506E-05 | 1.16688E-04 | -1.8508E+00 | -1.0295E+00 |
| CCNA_00604 | 5.13775E-05 | 1.10069E-04 | -1.0992E+00 | -6.0093E-01 |
| CCNA_00605 | 8.48297E-05 | 1.38055E-04 | -7.0263E-01 | -3.7477E-01 |
| CCNA_00606 | 1.23443E-04 | 1.30648E-04 | -8.1880E-02 | -2.0772E-02 |
| CCNA_00607 | 1.41959E-04 | 1.47069E-04 | -5.1062E-02 | -3.1973E-03 |
| CCNA_00608 | 4.89518E-05 | 9.81808E-05 | -1.0041E+00 | -5.4669E-01 |
| CCNA_00609 | 4.32882E-04 | 7.38720E-05 | 2.5507E+00  | 1.4806E+00  |
| CCNA_00610 | 3.10784E-04 | 6.80106E-05 | 2.1919E+00  | 1.2759E+00  |
| CCNA_00611 | 3.08307E-05 | 9.09385E-05 | -1.5605E+00 | -8.6400E-01 |
| CCNA_00612 | 2.33638E-05 | 1.47099E-04 | -2.6543E+00 | -1.4878E+00 |
| CCNA_00613 | 1.50533E-04 | 1.44284E-04 | 6.1120E-02  | 6.0778E-02  |
| CCNA_00614 | 1.34925E-04 | 1.07254E-04 | 3.3105E-01  | 2.1471E-01  |
| CCNA_00615 | 2.45165E-05 | 1.38070E-04 | -2.4935E+00 | -1.3961E+00 |
| CCNA_00616 | 1.40430E-04 | 7.58684E-05 | 8.8817E-01  | 5.3242E-01  |
| CCNA_00617 | 1.46028E-04 | 1.11292E-04 | 3.9182E-01  | 2.4937E-01  |
| CCNA_00618 | 2.14918E-05 | 1.46611E-04 | -2.7700E+00 | -1.5537E+00 |
| CCNA_00619 | 2.65992E-05 | 1.11998E-04 | -2.0739E+00 | -1.1568E+00 |
| CCNA_00620 | 1.77451E-04 | 9.83835E-05 | 8.5085E-01  | 5.1114E-01  |
| CCNA_00621 | 2.83719E-05 | 1.31848E-04 | -2.2163E+00 | -1.2380E+00 |
| CCNA_00622 | 3.83699E-05 | 1.26595E-04 | -1.7221E+00 | -9.5618E-01 |
| CCNA_00623 | 3.18059E-05 | 1.47654E-04 | -2.2148E+00 | -1.2371E+00 |
| CCNA_00624 | 2.30162E-04 | 8.88146E-05 | 1.3737E+00  | 8.0930E-01  |
| CCNA_00625 | 2.26897E-04 | 5.51395E-05 | 2.0407E+00  | 1.1897E+00  |
| CCNA_00626 | 2.50182E-04 | 8.17298E-05 | 1.6139E+00  | 9.4631E-01  |
| CCNA_00627 | 1.50015E-04 | 8.44616E-05 | 8.2864E-01  | 4.9848E-01  |
| CCNA_00628 | 3.34852E-05 | 1.44397E-04 | -2.1084E+00 | -1.1764E+00 |
| CCNA_00629 | 1.32478E-04 | 3.93114E-05 | 1.7525E+00  | 1.0253E+00  |
| CCNA_00630 | 9.01025E-05 | 1.43264E-04 | -6.6906E-01 | -3.5563E-01 |
| CCNA_00631 | 1.63475E-04 | 1.47099E-04 | 1.5223E-01  | 1.1274E-01  |
| CCNA_00632 | 2.71966E-04 | 1.29259E-04 | 1.0731E+00  | 6.3788E-01  |
| CCNA_00633 | 1.47560E-04 | 7.23260E-05 | 1.0286E+00  | 6.1250E-01  |
| CCNA_00634 | 2.34066E-04 | 1.05168E-04 | 1.1541E+00  | 6.8410E-01  |
| CCNA_00635 | 4.93551E-05 | 1.14512E-04 | -1.2142E+00 | -6.6653E-01 |

|            |             |             |             |             |
|------------|-------------|-------------|-------------|-------------|
| CCNA_00636 | 1.84244E-04 | 1.13551E-04 | 6.9820E-01  | 4.2409E-01  |
| CCNA_00637 | 3.84632E-05 | 1.46964E-04 | -1.9339E+00 | -1.0769E+00 |
| CCNA_00638 | 6.37231E-05 | 1.47436E-04 | -1.2102E+00 | -6.6423E-01 |
| CCNA_00639 | 1.14628E-04 | 1.08072E-04 | 8.4899E-02  | 7.4338E-02  |
| CCNA_00640 | 2.72905E-04 | 1.47099E-04 | 8.9156E-01  | 5.3436E-01  |
| CCNA_00641 | 4.12019E-04 | 1.47421E-04 | 1.4827E+00  | 8.7148E-01  |
| CCNA_00642 | 2.50907E-04 | 9.23269E-05 | 1.4422E+00  | 8.4840E-01  |
| CCNA_00643 | 9.87252E-05 | 1.26550E-04 | -3.5826E-01 | -1.7838E-01 |
| CCNA_00644 | 6.86529E-05 | 1.18655E-04 | -7.8940E-01 | -4.2426E-01 |
| CCNA_00645 | 8.27049E-05 | 9.93516E-05 | -2.6463E-01 | -1.2499E-01 |
| CCNA_00646 | 1.04401E-04 | 1.38048E-04 | -4.0306E-01 | -2.0394E-01 |
| CCNA_00647 | 1.46037E-04 | 1.41552E-04 | 4.4947E-02  | 5.1555E-02  |
| CCNA_00648 | 7.99179E-05 | 5.98301E-05 | 4.1752E-01  | 2.6402E-01  |
| CCNA_00649 | 4.71219E-05 | 6.75078E-05 | -5.1872E-01 | -2.6989E-01 |
| CCNA_00650 | 1.09190E-04 | 9.97194E-05 | 1.3082E-01  | 1.0053E-01  |
| CCNA_00651 | 4.94754E-05 | 9.53064E-05 | -9.4589E-01 | -5.1350E-01 |
| CCNA_00652 | 1.93589E-04 | 1.47099E-04 | 3.9616E-01  | 2.5184E-01  |
| CCNA_00653 | 1.50058E-04 | 1.03847E-04 | 5.3098E-01  | 3.2873E-01  |
| CCNA_00654 | 3.33980E-05 | 8.74637E-05 | -1.3889E+00 | -7.6615E-01 |
| CCNA_00655 | 1.57633E-04 | 1.18640E-04 | 4.0992E-01  | 2.5969E-01  |
| CCNA_00656 | 1.27494E-04 | 1.23143E-04 | 5.0049E-02  | 5.4464E-02  |
| CCNA_00657 | 4.94905E-05 | 9.90815E-05 | -1.0015E+00 | -5.4520E-01 |
| CCNA_00658 | 3.18901E-05 | 7.17781E-05 | -1.1704E+00 | -6.4156E-01 |
| CCNA_00659 | 3.00061E-05 | 5.62352E-05 | -9.0627E-01 | -4.9090E-01 |
| CCNA_00660 | 3.80846E-04 | 3.22251E-04 | 2.4100E-01  | 1.6336E-01  |
| CCNA_00661 | 7.42207E-05 | 1.54686E-04 | -1.0595E+00 | -5.7827E-01 |
| CCNA_00662 | 6.50112E-05 | 1.30820E-04 | -1.0088E+00 | -5.4940E-01 |
| CCNA_00663 | 6.11378E-05 | 1.14332E-04 | -9.0311E-01 | -4.8910E-01 |
| CCNA_00664 | 1.44417E-04 | 1.30355E-04 | 1.4775E-01  | 1.1018E-01  |
| CCNA_00665 | 2.70253E-04 | 7.58459E-05 | 1.8330E+00  | 1.0713E+00  |
| CCNA_00666 | 1.37089E-04 | 4.96308E-05 | 1.4656E+00  | 8.6173E-01  |
| CCNA_00667 | 2.54314E-05 | 3.31948E-05 | -3.8450E-01 | -1.9335E-01 |
| CCNA_00668 | 2.62079E-05 | 1.45297E-04 | -2.4708E+00 | -1.3831E+00 |
| CCNA_00669 | 4.44192E-05 | 1.47369E-04 | -1.7302E+00 | -9.6074E-01 |
| CCNA_00670 | 3.11570E-04 | 8.93774E-05 | 1.8015E+00  | 1.0533E+00  |
| CCNA_00671 | 1.97134E-04 | 1.47099E-04 | 4.2234E-01  | 2.6678E-01  |
| CCNA_00672 | 1.16145E-04 | 5.04038E-05 | 1.2041E+00  | 7.1262E-01  |
| CCNA_00673 | 9.83881E-05 | 4.92180E-05 | 9.9912E-01  | 5.9570E-01  |
| CCNA_00674 | 2.28040E-05 | 8.90547E-05 | -1.9653E+00 | -1.0949E+00 |
| CCNA_00675 | 2.61056E-05 | 1.43234E-04 | -2.4558E+00 | -1.3746E+00 |
| CCNA_00676 | 3.05839E-05 | 8.77413E-05 | -1.5205E+00 | -8.4116E-01 |
| CCNA_00677 | 3.34491E-05 | 1.20403E-04 | -1.8478E+00 | -1.0278E+00 |
| CCNA_00678 | 2.03003E-04 | 1.48367E-04 | 4.5228E-01  | 2.8385E-01  |
| CCNA_00679 | 2.60878E-04 | 7.22592E-04 | -1.4698E+00 | -8.1227E-01 |
| CCNA_00680 | 2.31020E-05 | 1.47309E-04 | -2.6726E+00 | -1.4982E+00 |
| CCNA_00681 | 1.21978E-04 | 1.15780E-04 | 7.5171E-02  | 6.8791E-02  |
| CCNA_00682 | 7.73597E-05 | 1.25724E-04 | -7.0064E-01 | -3.7364E-01 |
| CCNA_00683 | 1.17331E-04 | 7.08100E-05 | 7.2844E-01  | 4.4134E-01  |
| CCNA_00684 | 1.33158E-04 | 5.77362E-05 | 1.2054E+00  | 7.1336E-01  |
| CCNA_00685 | 2.61679E-04 | 7.53806E-05 | 1.7954E+00  | 1.0498E+00  |
| CCNA_00686 | 2.64833E-04 | 7.56207E-05 | 1.8081E+00  | 1.0570E+00  |
| CCNA_00687 | 1.07570E-04 | 1.45958E-04 | -4.4030E-01 | -2.2517E-01 |
| CCNA_00688 | 1.31825E-04 | 7.37295E-05 | 8.3820E-01  | 5.0393E-01  |

|            |             |             |             |             |
|------------|-------------|-------------|-------------|-------------|
| CCNA_00689 | 1.31298E-04 | 7.44950E-05 | 8.1752E-01  | 4.9214E-01  |
| CCNA_00690 | 2.28612E-05 | 1.46416E-04 | -2.6790E+00 | -1.5018E+00 |
| CCNA_00691 | 2.35245E-04 | 1.07194E-04 | 1.1339E+00  | 6.7253E-01  |
| CCNA_00692 | 2.53637E-04 | 6.56841E-05 | 1.9490E+00  | 1.1374E+00  |
| CCNA_00693 | 6.47885E-05 | 1.10894E-04 | -7.7541E-01 | -4.1628E-01 |
| CCNA_00694 | 1.46145E-04 | 2.49843E-05 | 2.5479E+00  | 1.4789E+00  |
| CCNA_00695 | 1.79615E-05 | 1.12305E-04 | -2.6443E+00 | -1.4821E+00 |
| CCNA_00696 | 2.60635E-05 | 1.47331E-04 | -2.4989E+00 | -1.3991E+00 |
| CCNA_00697 | 5.01183E-04 | 1.47639E-04 | 1.7632E+00  | 1.0314E+00  |
| CCNA_00698 | 3.02261E-04 | 8.83117E-05 | 1.7750E+00  | 1.0382E+00  |
| CCNA_00699 | 4.22358E-04 | 1.47099E-04 | 1.5216E+00  | 8.9367E-01  |
| CCNA_00700 | 9.48788E-05 | 1.09326E-04 | -2.0453E-01 | -9.0716E-02 |
| CCNA_00701 | 2.88263E-05 | 4.10600E-05 | -5.1046E-01 | -2.6518E-01 |
| CCNA_00702 | 2.57944E-04 | 1.47016E-04 | 8.1103E-01  | 4.8843E-01  |
| CCNA_00703 | 1.00164E-04 | 1.06571E-04 | -8.9519E-02 | -2.5128E-02 |
| CCNA_00704 | 3.05210E-04 | 1.25139E-04 | 1.2862E+00  | 7.5941E-01  |
| CCNA_00705 | 2.00622E-05 | 9.69951E-05 | -2.2733E+00 | -1.2705E+00 |
| CCNA_00706 | 2.15219E-05 | 6.76354E-05 | -1.6519E+00 | -9.1614E-01 |
| CCNA_00707 | 5.75021E-05 | 5.59650E-05 | 3.8972E-02  | 4.8147E-02  |
| CCNA_00708 | 9.85476E-05 | 4.53229E-05 | 1.1204E+00  | 6.6485E-01  |
| CCNA_00709 | 8.18351E-05 | 5.62277E-05 | 5.4130E-01  | 3.3461E-01  |
| CCNA_00710 | 6.64287E-05 | 1.40892E-04 | -1.0847E+00 | -5.9267E-01 |
| CCNA_00711 | 7.91926E-05 | 1.40036E-04 | -8.2239E-01 | -4.4307E-01 |
| CCNA_00712 | 3.28051E-05 | 6.17514E-05 | -9.1260E-01 | -4.9451E-01 |
| CCNA_00713 | 1.60384E-05 | 1.19390E-04 | -2.8959E+00 | -1.6255E+00 |
| CCNA_00714 | 2.97443E-04 | 8.87545E-05 | 1.7446E+00  | 1.0208E+00  |
| CCNA_00715 | 1.44499E-04 | 1.44022E-04 | 4.7266E-03  | 2.8618E-02  |
| CCNA_00716 | 2.00776E-04 | 9.98320E-05 | 1.0079E+00  | 6.0072E-01  |
| CCNA_00717 | 2.26204E-04 | 7.49678E-05 | 1.5932E+00  | 9.3447E-01  |
| CCNA_00718 | 7.12441E-05 | 1.15930E-04 | -7.0245E-01 | -3.7467E-01 |
| CCNA_00719 | 1.50154E-04 | 3.89061E-05 | 1.9481E+00  | 1.1369E+00  |
| CCNA_00720 | 9.12071E-05 | 7.45550E-05 | 2.9074E-01  | 1.9173E-01  |
| CCNA_00721 | 3.88905E-05 | 1.16163E-04 | -1.5786E+00 | -8.7434E-01 |
| CCNA_00722 | 1.47993E-04 | 1.02474E-04 | 5.3020E-01  | 3.2828E-01  |
| CCNA_00723 | 1.43867E-04 | 9.12462E-05 | 6.5681E-01  | 4.0049E-01  |
| CCNA_00724 | 1.51577E-04 | 1.32291E-04 | 1.9628E-01  | 1.3786E-01  |
| CCNA_00725 | 1.62159E-05 | 1.36457E-04 | -3.0728E+00 | -1.7264E+00 |
| CCNA_00726 | 2.09230E-05 | 1.00102E-04 | -2.2582E+00 | -1.2619E+00 |
| CCNA_00727 | 2.15370E-05 | 8.71635E-05 | -2.0168E+00 | -1.1242E+00 |
| CCNA_00728 | 2.39688E-05 | 9.24920E-05 | -1.9481E+00 | -1.0850E+00 |
| CCNA_00729 | 6.38043E-05 | 8.59702E-05 | -4.3024E-01 | -2.1943E-01 |
| CCNA_00730 | 3.34913E-05 | 1.38671E-04 | -2.0498E+00 | -1.1430E+00 |
| CCNA_00731 | 2.04902E-04 | 1.22265E-04 | 7.4486E-01  | 4.5070E-01  |
| CCNA_00732 | 1.86775E-04 | 7.42473E-05 | 1.3308E+00  | 7.8483E-01  |
| CCNA_00733 | 9.18090E-05 | 2.00459E-05 | 2.1948E+00  | 1.2776E+00  |
| CCNA_00734 | 3.48035E-05 | 1.28426E-04 | -1.8836E+00 | -1.0483E+00 |
| CCNA_00735 | 1.15697E-04 | 7.12528E-05 | 6.9921E-01  | 4.2467E-01  |
| CCNA_00736 | 2.56090E-05 | 4.98785E-05 | -9.6181E-01 | -5.2258E-01 |
| CCNA_00737 | 1.16335E-04 | 1.35361E-04 | -2.1857E-01 | -9.8725E-02 |
| CCNA_00738 | 1.68871E-05 | 1.25019E-04 | -2.8880E+00 | -1.6210E+00 |
| CCNA_00739 | 2.54013E-05 | 4.47825E-05 | -8.1810E-01 | -4.4062E-01 |
| CCNA_00740 | 8.73186E-05 | 1.47099E-04 | -7.5245E-01 | -4.0318E-01 |
| CCNA_00741 | 2.01926E-04 | 1.28509E-04 | 6.5190E-01  | 3.9768E-01  |

|            |             |             |             |             |
|------------|-------------|-------------|-------------|-------------|
| CCNA_00742 | 2.75972E-04 | 4.05947E-05 | 2.7649E+00  | 1.6027E+00  |
| CCNA_00743 | 2.57508E-04 | 1.33470E-04 | 9.4804E-01  | 5.6657E-01  |
| CCNA_00744 | 1.14062E-04 | 5.63628E-05 | 1.0169E+00  | 6.0581E-01  |
| CCNA_00745 | 1.20867E-05 | 1.01108E-04 | -3.0641E+00 | -1.7215E+00 |
| CCNA_00746 | 2.10946E-05 | 1.19645E-04 | -2.5037E+00 | -1.4019E+00 |
| CCNA_00747 | 4.65465E-04 | 1.40419E-04 | 1.7289E+00  | 1.0119E+00  |
| CCNA_00748 | 4.52222E-04 | 1.43001E-04 | 1.6609E+00  | 9.7312E-01  |
| CCNA_00749 | 1.89610E-04 | 6.98493E-05 | 1.4406E+00  | 8.4746E-01  |
| CCNA_00750 | 1.27160E-04 | 1.12050E-04 | 1.8244E-01  | 1.2996E-01  |
| CCNA_00751 | 2.15881E-05 | 1.47414E-04 | -2.7714E+00 | -1.5546E+00 |
| CCNA_00752 | 2.69754E-05 | 7.75495E-05 | -1.5235E+00 | -8.4287E-01 |
| CCNA_00753 | 9.37653E-05 | 7.46976E-05 | 3.2789E-01  | 2.1291E-01  |
| CCNA_00754 | 2.29696E-05 | 1.30175E-04 | -2.5025E+00 | -1.4012E+00 |
| CCNA_00755 | 3.72112E-05 | 9.47586E-05 | -1.3485E+00 | -7.4311E-01 |
| CCNA_00756 | 2.03271E-05 | 1.21627E-04 | -2.5809E+00 | -1.4459E+00 |
| CCNA_00757 | 3.70125E-05 | 1.40479E-04 | -1.9242E+00 | -1.0714E+00 |
| CCNA_00758 | 3.02439E-05 | 1.47099E-04 | -2.2820E+00 | -1.2755E+00 |
| CCNA_00759 | 1.73102E-04 | 5.95975E-05 | 1.5381E+00  | 9.0309E-01  |
| CCNA_00760 | 3.76114E-04 | 7.68891E-05 | 2.2902E+00  | 1.3320E+00  |
| CCNA_00761 | 8.10887E-05 | 1.40952E-04 | -7.9766E-01 | -4.2896E-01 |
| CCNA_00762 | 1.29177E-04 | 1.12921E-04 | 1.9397E-01  | 1.3654E-01  |
| CCNA_00763 | 4.59150E-05 | 1.06309E-04 | -1.2112E+00 | -6.6481E-01 |
| CCNA_00764 | 2.85765E-05 | 1.20508E-04 | -2.0762E+00 | -1.1581E+00 |
| CCNA_00765 | 2.83568E-05 | 1.23743E-04 | -2.1255E+00 | -1.1862E+00 |
| CCNA_00766 | 5.66561E-04 | 1.48472E-04 | 1.9320E+00  | 1.1277E+00  |
| CCNA_00767 | 6.96942E-05 | 7.66564E-05 | -1.3745E-01 | -5.2461E-02 |
| CCNA_00768 | 3.78101E-05 | 1.06339E-04 | -1.4918E+00 | -8.2482E-01 |
| CCNA_00769 | 2.05709E-05 | 1.14594E-04 | -2.4777E+00 | -1.3871E+00 |
| CCNA_00770 | 4.03984E-05 | 8.22251E-05 | -1.0253E+00 | -5.5879E-01 |
| CCNA_00771 | 1.89806E-04 | 9.00829E-05 | 1.0751E+00  | 6.3903E-01  |
| CCNA_00772 | 7.20447E-05 | 1.45080E-04 | -1.0099E+00 | -5.5000E-01 |
| CCNA_00773 | 8.75323E-05 | 9.79857E-05 | -1.6282E-01 | -6.6928E-02 |
| CCNA_00774 | 1.65997E-04 | 6.96467E-05 | 1.2529E+00  | 7.4042E-01  |
| CCNA_00775 | 3.23626E-05 | 4.68089E-05 | -5.3255E-01 | -2.7778E-01 |
| CCNA_00776 | 1.56143E-04 | 8.67657E-05 | 8.4757E-01  | 5.0928E-01  |
| CCNA_00777 | 1.63162E-04 | 1.37357E-04 | 2.4832E-01  | 1.6753E-01  |
| CCNA_00778 | 2.44906E-04 | 1.00808E-04 | 1.2805E+00  | 7.5618E-01  |
| CCNA_00779 | 1.76651E-04 | 7.75045E-05 | 1.1884E+00  | 7.0366E-01  |
| CCNA_00780 | 1.14830E-04 | 6.35751E-05 | 8.5283E-01  | 5.1227E-01  |
| CCNA_00781 | 1.13767E-04 | 7.68515E-05 | 5.6584E-01  | 3.4861E-01  |
| CCNA_00782 | 3.58448E-05 | 4.45874E-05 | -3.1499E-01 | -1.5371E-01 |
| CCNA_00783 | 2.70380E-04 | 9.29649E-05 | 1.5401E+00  | 9.0422E-01  |
| CCNA_00784 | 1.77427E-04 | 8.93249E-05 | 9.9000E-01  | 5.9049E-01  |
| CCNA_00785 | 2.38935E-05 | 1.27105E-04 | -2.4112E+00 | -1.3492E+00 |
| CCNA_04003 | 3.29504E-04 | 1.32029E-04 | 1.3194E+00  | 7.7833E-01  |
| CCNA_00787 | 3.16764E-05 | 1.26460E-04 | -1.9971E+00 | -1.1130E+00 |
| CCNA_00788 | 2.68490E-05 | 7.92907E-05 | -1.5623E+00 | -8.6500E-01 |
| CCNA_00789 | 1.50416E-04 | 1.21769E-04 | 3.0475E-01  | 1.9971E-01  |
| CCNA_00790 | 1.43298E-04 | 1.38468E-04 | 4.9418E-02  | 5.4105E-02  |
| CCNA_00791 | 8.12000E-05 | 9.66798E-05 | -2.5179E-01 | -1.1767E-01 |
| CCNA_00792 | 2.24937E-04 | 6.76879E-05 | 1.7324E+00  | 1.0139E+00  |
| CCNA_00793 | 3.19169E-04 | 5.05164E-05 | 2.6593E+00  | 1.5425E+00  |
| CCNA_00794 | 4.40340E-05 | 3.10333E-05 | 5.0455E-01  | 3.1366E-01  |

|            |             |             |             |             |
|------------|-------------|-------------|-------------|-------------|
| CCNA_00795 | 4.40912E-04 | 1.45913E-04 | 1.5953E+00  | 9.3570E-01  |
| CCNA_00796 | 4.07806E-05 | 5.02837E-05 | -3.0232E-01 | -1.4648E-01 |
| CCNA_00797 | 2.80438E-05 | 5.58074E-05 | -9.9281E-01 | -5.4026E-01 |
| CCNA_00798 | 6.08308E-05 | 6.91964E-05 | -1.8598E-01 | -8.0138E-02 |
| CCNA_00799 | 3.01174E-05 | 1.43226E-04 | -2.2496E+00 | -1.2569E+00 |
| CCNA_00800 | 2.51877E-05 | 1.47099E-04 | -2.5459E+00 | -1.4259E+00 |
| CCNA_00801 | 1.21791E-04 | 1.25372E-04 | -4.1853E-02 | 2.0544E-03  |
| CCNA_00802 | 4.90661E-05 | 1.47099E-04 | -1.5840E+00 | -8.7738E-01 |
| CCNA_00803 | 1.54467E-04 | 9.87512E-05 | 6.4534E-01  | 3.9395E-01  |
| CCNA_00804 | 1.41606E-04 | 7.05698E-05 | 1.0046E+00  | 5.9885E-01  |
| CCNA_00805 | 9.46050E-05 | 1.34925E-04 | -5.1221E-01 | -2.6618E-01 |
| CCNA_00806 | 3.29375E-05 | 1.05521E-04 | -1.6797E+00 | -9.3197E-01 |
| CCNA_00807 | 9.02500E-05 | 9.10586E-05 | -1.2938E-02 | 1.8544E-02  |
| CCNA_00808 | 1.81580E-04 | 4.50152E-05 | 2.0119E+00  | 1.1733E+00  |
| CCNA_00809 | 2.85675E-05 | 5.30606E-05 | -8.9332E-01 | -4.8352E-01 |
| CCNA_00810 | 5.60936E-05 | 4.06548E-05 | 4.6422E-01  | 2.9066E-01  |
| CCNA_00811 | 7.84793E-05 | 1.47969E-04 | -9.1493E-01 | -4.9584E-01 |
| CCNA_00812 | 8.81463E-05 | 4.76269E-05 | 8.8794E-01  | 5.3230E-01  |
| CCNA_00813 | 3.44272E-05 | 1.45755E-04 | -2.0819E+00 | -1.1613E+00 |
| CCNA_00814 | 8.07456E-05 | 5.64979E-05 | 5.1505E-01  | 3.1964E-01  |
| CCNA_00815 | 2.34391E-05 | 3.17238E-05 | -4.3681E-01 | -2.2318E-01 |
| CCNA_00816 | 3.90350E-05 | 1.05326E-04 | -1.4320E+00 | -7.9072E-01 |
| CCNA_00817 | 2.69272E-05 | 8.92799E-05 | -1.7292E+00 | -9.6022E-01 |
| CCNA_00818 | 3.25161E-05 | 4.76795E-05 | -5.5231E-01 | -2.8905E-01 |
| CCNA_00819 | 3.09752E-05 | 5.41413E-05 | -8.0568E-01 | -4.3354E-01 |
| CCNA_00820 | 3.33528E-05 | 5.79088E-05 | -7.9603E-01 | -4.2804E-01 |
| CCNA_00821 | 7.95959E-05 | 7.18532E-05 | 1.4755E-01  | 1.1006E-01  |
| CCNA_00822 | 4.69558E-04 | 1.09964E-04 | 2.0942E+00  | 1.2202E+00  |
| CCNA_00823 | 1.89126E-05 | 1.47609E-04 | -2.9642E+00 | -1.6645E+00 |
| CCNA_00824 | 1.65976E-04 | 1.03269E-04 | 6.8448E-01  | 4.1627E-01  |
| CCNA_00825 | 3.60555E-05 | 3.15136E-05 | 1.9402E-01  | 1.3657E-01  |
| CCNA_00826 | 2.15908E-04 | 1.34213E-04 | 6.8584E-01  | 4.1704E-01  |
| CCNA_00827 | 2.68920E-04 | 1.26512E-04 | 1.0878E+00  | 6.4629E-01  |
| CCNA_00828 | 9.05359E-05 | 8.97377E-05 | 1.2704E-02  | 3.3167E-02  |
| CCNA_00829 | 2.29876E-05 | 1.47654E-04 | -2.6832E+00 | -1.5042E+00 |
| CCNA_00830 | 2.80288E-05 | 1.13709E-04 | -2.0203E+00 | -1.1262E+00 |
| CCNA_00831 | 4.35796E-05 | 7.66264E-05 | -8.1423E-01 | -4.3842E-01 |
| CCNA_00832 | 3.37170E-05 | 1.47099E-04 | -2.1252E+00 | -1.1860E+00 |
| CCNA_00833 | 2.86758E-05 | 1.40104E-04 | -2.2885E+00 | -1.2792E+00 |
| CCNA_00834 | 3.46819E-04 | 7.16956E-05 | 2.2741E+00  | 1.3228E+00  |
| CCNA_00835 | 6.19865E-05 | 9.89914E-05 | -6.7539E-01 | -3.5924E-01 |
| CCNA_00836 | 2.21858E-04 | 1.41530E-04 | 6.4848E-01  | 3.9573E-01  |
| CCNA_00837 | 6.50894E-05 | 1.06729E-04 | -7.1349E-01 | -3.8097E-01 |
| CCNA_00838 | 8.61388E-05 | 9.89389E-05 | -1.9993E-01 | -8.8094E-02 |
| CCNA_00839 | 9.04667E-05 | 9.40681E-05 | -5.6386E-02 | -6.2330E-03 |
| CCNA_00840 | 1.36024E-04 | 2.31080E-05 | 2.5570E+00  | 1.4841E+00  |
| CCNA_00841 | 1.14676E-04 | 4.94582E-05 | 1.2131E+00  | 7.1773E-01  |
| CCNA_00842 | 1.31518E-04 | 6.84609E-05 | 9.4178E-01  | 5.6300E-01  |
| CCNA_00843 | 2.11758E-05 | 1.33845E-04 | -2.6599E+00 | -1.4910E+00 |
| CCNA_00844 | 1.01482E-04 | 8.73136E-05 | 2.1686E-01  | 1.4960E-01  |
| CCNA_00845 | 1.08633E-04 | 1.17416E-04 | -1.1222E-01 | -3.8076E-02 |
| CCNA_00846 | 5.07305E-05 | 1.05251E-04 | -1.0529E+00 | -5.7454E-01 |
| CCNA_00847 | 6.21099E-05 | 4.23884E-05 | 5.5097E-01  | 3.4013E-01  |



|            |             |             |             |             |
|------------|-------------|-------------|-------------|-------------|
| CCNA_00848 | 1.85454E-05 | 8.22777E-05 | -2.1493E+00 | -1.1998E+00 |
| CCNA_00849 | 4.86237E-05 | 1.43399E-04 | -1.5603E+00 | -8.6387E-01 |
| CCNA_00850 | 3.80840E-05 | 1.26798E-04 | -1.7352E+00 | -9.6365E-01 |
| CCNA_00851 | 1.19440E-04 | 1.44772E-05 | 3.0437E+00  | 1.7617E+00  |
| CCNA_00852 | 1.15525E-04 | 1.53703E-05 | 2.9093E+00  | 1.6850E+00  |
| CCNA_00853 | 7.94544E-05 | 1.38723E-04 | -8.0403E-01 | -4.3260E-01 |
| CCNA_00854 | 1.04976E-04 | 1.45207E-04 | -4.6809E-01 | -2.4102E-01 |
| CCNA_00855 | 5.11368E-05 | 9.54715E-05 | -9.0074E-01 | -4.8775E-01 |
| CCNA_00856 | 2.54164E-05 | 6.30723E-05 | -1.3112E+00 | -7.2185E-01 |
| CCNA_00857 | 2.39044E-04 | 8.95426E-05 | 1.4165E+00  | 8.3373E-01  |
| CCNA_00858 | 2.29729E-04 | 1.00185E-04 | 1.1972E+00  | 7.0865E-01  |
| CCNA_00859 | 8.00052E-05 | 6.59017E-05 | 2.7967E-01  | 1.8541E-01  |
| CCNA_00860 | 9.38104E-05 | 7.89980E-05 | 2.4784E-01  | 1.6726E-01  |
| CCNA_00861 | 1.19982E-04 | 1.49223E-04 | -3.1468E-01 | -1.5353E-01 |
| CCNA_00862 | 1.42681E-04 | 1.33132E-04 | 9.9886E-02  | 8.2885E-02  |
| CCNA_00863 | 4.92286E-05 | 8.63679E-05 | -8.1103E-01 | -4.3659E-01 |
| CCNA_00864 | 6.15501E-05 | 1.08448E-04 | -8.1720E-01 | -4.4011E-01 |
| CCNA_00865 | 2.25091E-05 | 7.12228E-05 | -1.6618E+00 | -9.2176E-01 |
| CCNA_00866 | 1.87621E-05 | 3.94690E-05 | -1.0729E+00 | -5.8595E-01 |
| CCNA_00867 | 1.87169E-05 | 3.41704E-05 | -8.6849E-01 | -4.6936E-01 |
| CCNA_04017 | 1.78772E-05 | 1.13078E-04 | -2.6610E+00 | -1.4916E+00 |
| CCNA_00869 | 1.47987E-04 | 1.14107E-04 | 3.7502E-01  | 2.3979E-01  |
| CCNA_00870 | 1.10776E-04 | 1.43023E-04 | -3.6865E-01 | -1.8431E-01 |
| CCNA_00871 | 1.50431E-04 | 7.38796E-05 | 1.0257E+00  | 6.1088E-01  |
| CCNA_00872 | 1.61253E-04 | 7.98010E-05 | 1.0147E+00  | 6.0461E-01  |
| CCNA_00873 | 1.61828E-05 | 6.15038E-05 | -1.9261E+00 | -1.0725E+00 |
| CCNA_00874 | 1.49308E-05 | 4.83774E-05 | -1.6960E+00 | -9.4125E-01 |
| CCNA_00875 | 1.50906E-04 | 1.06279E-04 | 5.0573E-01  | 3.1433E-01  |
| CCNA_00876 | 4.74349E-05 | 4.85726E-05 | -3.4324E-02 | 6.3480E-03  |
| CCNA_00877 | 1.06321E-04 | 6.28246E-05 | 7.5890E-01  | 4.5871E-01  |
| CCNA_00878 | 1.20455E-04 | 7.47952E-05 | 6.8737E-01  | 4.1791E-01  |
| CCNA_00879 | 1.33489E-04 | 1.94005E-05 | 2.7820E+00  | 1.6125E+00  |
| CCNA_00880 | 1.42807E-05 | 1.25417E-04 | -3.1344E+00 | -1.7615E+00 |
| CCNA_00881 | 4.56141E-05 | 1.02271E-04 | -1.1649E+00 | -6.3837E-01 |
| CCNA_00882 | 1.28803E-04 | 1.32959E-04 | -4.5860E-02 | -2.3023E-04 |
| CCNA_00883 | 7.25624E-05 | 8.26304E-05 | -1.8752E-01 | -8.1017E-02 |
| CCNA_00884 | 1.86667E-04 | 1.14377E-04 | 7.0660E-01  | 4.2888E-01  |
| CCNA_00885 | 1.94188E-04 | 1.36539E-04 | 5.0808E-01  | 3.1567E-01  |
| CCNA_00886 | 1.95416E-04 | 1.39158E-04 | 4.8976E-01  | 3.0522E-01  |
| CCNA_00887 | 2.14286E-05 | 8.46568E-05 | -1.9820E+00 | -1.1044E+00 |
| CCNA_00888 | 3.87280E-05 | 6.49035E-05 | -7.4497E-01 | -3.9892E-01 |
| CCNA_00889 | 3.12921E-04 | 1.47391E-04 | 1.0861E+00  | 6.4529E-01  |
| CCNA_00890 | 3.10926E-05 | 4.63211E-05 | -5.7519E-01 | -3.0210E-01 |
| CCNA_00891 | 2.16724E-05 | 7.84201E-05 | -1.8553E+00 | -1.0321E+00 |
| CCNA_00892 | 1.09596E-04 | 8.55574E-05 | 3.5714E-01  | 2.2959E-01  |
| CCNA_00893 | 1.52396E-04 | 1.71265E-05 | 3.1529E+00  | 1.8240E+00  |
| CCNA_00894 | 1.88253E-05 | 1.41695E-04 | -2.9119E+00 | -1.6347E+00 |
| CCNA_00895 | 1.36752E-04 | 1.47099E-04 | -1.0526E-01 | -3.4108E-02 |
| CCNA_00896 | 7.33569E-05 | 5.59350E-05 | 3.9105E-01  | 2.4893E-01  |
| CCNA_00897 | 1.44014E-04 | 6.19315E-05 | 1.2173E+00  | 7.2013E-01  |
| CCNA_00898 | 5.19494E-05 | 5.50719E-05 | -8.4324E-02 | -2.2166E-02 |
| CCNA_00899 | 1.13828E-04 | 8.87395E-05 | 3.5912E-01  | 2.3072E-01  |
| CCNA_00900 | 1.13505E-04 | 8.91673E-05 | 3.4809E-01  | 2.2443E-01  |

|            |             |             |             |             |
|------------|-------------|-------------|-------------|-------------|
| CCNA_00901 | 2.98180E-04 | 6.02354E-05 | 2.3073E+00  | 1.3417E+00  |
| CCNA_00902 | 2.30647E-04 | 2.23950E-05 | 3.3640E+00  | 1.9443E+00  |
| CCNA_00903 | 2.17835E-04 | 1.47099E-04 | 5.6640E-01  | 3.4892E-01  |
| CCNA_00904 | 3.85264E-05 | 7.13128E-05 | -8.8835E-01 | -4.8069E-01 |
| CCNA_00905 | 2.54826E-05 | 6.59392E-05 | -1.3716E+00 | -7.5628E-01 |
| CCNA_00906 | 3.02890E-05 | 1.31969E-04 | -2.1233E+00 | -1.1849E+00 |
| CCNA_00907 | 9.74942E-05 | 8.55199E-05 | 1.8898E-01  | 1.3369E-01  |
| CCNA_00908 | 3.15229E-05 | 7.09301E-05 | -1.1700E+00 | -6.4131E-01 |
| CCNA_00909 | 8.63525E-05 | 4.64937E-05 | 8.9302E-01  | 5.3519E-01  |
| CCNA_00910 | 1.97312E-05 | 7.06524E-05 | -1.8402E+00 | -1.0235E+00 |
| CCNA_00911 | 1.42753E-04 | 6.59242E-05 | 1.1145E+00  | 6.6150E-01  |
| CCNA_00912 | 1.89968E-04 | 4.35442E-05 | 2.1250E+00  | 1.2378E+00  |
| CCNA_00913 | 1.59992E-04 | 1.41920E-04 | 1.7287E-01  | 1.2451E-01  |
| CCNA_00914 | 1.12780E-04 | 1.43316E-04 | -3.4572E-01 | -1.7124E-01 |
| CCNA_00915 | 1.07026E-04 | 1.12343E-04 | -7.0006E-02 | -1.4001E-02 |
| CCNA_00916 | 3.46560E-05 | 1.03870E-04 | -1.5836E+00 | -8.7716E-01 |
| CCNA_00917 | 5.35595E-05 | 1.21079E-04 | -1.1767E+00 | -6.4515E-01 |
| CCNA_00918 | 5.36107E-05 | 1.47099E-04 | -1.4562E+00 | -8.0451E-01 |
| CCNA_00919 | 2.84317E-04 | 4.74393E-05 | 2.5831E+00  | 1.4990E+00  |
| CCNA_00920 | 2.69790E-04 | 1.46686E-04 | 8.7905E-01  | 5.2722E-01  |
| CCNA_00921 | 3.31632E-05 | 1.39196E-04 | -2.0694E+00 | -1.1542E+00 |
| CCNA_00922 | 1.72708E-04 | 6.81832E-05 | 1.3407E+00  | 7.9050E-01  |
| CCNA_00923 | 3.66574E-05 | 1.16373E-04 | -1.6666E+00 | -9.2448E-01 |
| CCNA_00924 | 1.35121E-04 | 5.61377E-05 | 1.2670E+00  | 7.4849E-01  |
| CCNA_00925 | 1.59303E-04 | 1.16396E-04 | 4.5267E-01  | 2.8407E-01  |
| CCNA_00926 | 2.08929E-05 | 1.30152E-04 | -2.6390E+00 | -1.4790E+00 |
| CCNA_00927 | 1.74980E-05 | 1.15825E-04 | -2.7265E+00 | -1.5290E+00 |
| CCNA_00928 | 1.70556E-05 | 1.28591E-04 | -2.9143E+00 | -1.6360E+00 |
| CCNA_00929 | 1.94513E-05 | 8.92574E-05 | -2.1980E+00 | -1.2275E+00 |
| CCNA_00930 | 3.35755E-05 | 1.16553E-04 | -1.7955E+00 | -9.9799E-01 |
| CCNA_00931 | 2.96479E-05 | 1.47099E-04 | -2.3107E+00 | -1.2918E+00 |
| CCNA_00932 | 3.17396E-05 | 1.32494E-04 | -2.0615E+00 | -1.1497E+00 |
| CCNA_00933 | 1.18926E-04 | 8.28105E-05 | 5.2208E-01  | 3.2365E-01  |
| CCNA_00934 | 1.49910E-05 | 9.39855E-05 | -2.6482E+00 | -1.4843E+00 |
| CCNA_00935 | 1.87591E-05 | 1.47031E-04 | -2.9703E+00 | -1.6680E+00 |
| CCNA_00936 | 1.86116E-05 | 1.27173E-04 | -2.7724E+00 | -1.5551E+00 |
| CCNA_00937 | 1.36951E-04 | 1.12545E-04 | 2.8308E-01  | 1.8736E-01  |
| CCNA_00938 | 5.26115E-05 | 1.38490E-04 | -1.3963E+00 | -7.7037E-01 |
| CCNA_00939 | 5.25513E-05 | 1.46881E-04 | -1.4828E+00 | -8.1971E-01 |
| CCNA_00940 | 1.30046E-04 | 1.47099E-04 | -1.7780E-01 | -7.5471E-02 |
| CCNA_00941 | 1.67059E-04 | 8.90322E-05 | 9.0786E-01  | 5.4366E-01  |
| CCNA_00942 | 1.69846E-04 | 7.70542E-05 | 1.1402E+00  | 6.7613E-01  |
| CCNA_00943 | 3.12431E-05 | 1.46994E-04 | -2.2341E+00 | -1.2481E+00 |
| CCNA_00944 | 2.03692E-05 | 4.93906E-05 | -1.2779E+00 | -7.0281E-01 |
| CCNA_00945 | 1.06481E-05 | 3.39753E-05 | -1.6738E+00 | -9.2861E-01 |
| CCNA_00946 | 5.28733E-05 | 7.05698E-05 | -4.1658E-01 | -2.1165E-01 |
| CCNA_00947 | 2.45015E-05 | 1.23120E-04 | -2.3290E+00 | -1.3023E+00 |
| CCNA_00948 | 2.10073E-05 | 1.03344E-04 | -2.2984E+00 | -1.2848E+00 |
| CCNA_00949 | 2.28672E-05 | 8.46643E-05 | -1.8884E+00 | -1.0510E+00 |
| CCNA_00950 | 2.33999E-05 | 5.43515E-05 | -1.2158E+00 | -6.6744E-01 |
| CCNA_00951 | 2.92690E-04 | 9.02705E-05 | 1.6969E+00  | 9.9365E-01  |
| CCNA_00952 | 2.14377E-05 | 9.03081E-05 | -2.0746E+00 | -1.1572E+00 |
| CCNA_00953 | 3.77529E-05 | 7.48777E-05 | -9.8798E-01 | -5.3750E-01 |

|            |             |             |             |             |
|------------|-------------|-------------|-------------|-------------|
| CCNA_00954 | 1.41026E-04 | 1.47099E-04 | -6.0870E-02 | -8.7902E-03 |
| CCNA_00955 | 2.13838E-04 | 1.39984E-04 | 6.1120E-01  | 3.7448E-01  |
| CCNA_00956 | 1.18228E-04 | 5.89971E-05 | 1.0027E+00  | 5.9774E-01  |
| CCNA_00957 | 2.46459E-05 | 5.31506E-05 | -1.1088E+00 | -6.0638E-01 |
| CCNA_00958 | 2.52662E-04 | 4.99385E-05 | 2.3388E+00  | 1.3597E+00  |
| CCNA_00959 | 2.76769E-04 | 5.52896E-05 | 2.3234E+00  | 1.3509E+00  |
| CCNA_00960 | 7.61860E-05 | 4.40771E-05 | 7.8931E-01  | 4.7605E-01  |
| CCNA_00961 | 8.38305E-05 | 3.99643E-05 | 1.0685E+00  | 6.3529E-01  |
| CCNA_00962 | 1.55087E-04 | 1.40599E-04 | 1.4144E-01  | 1.0658E-01  |
| CCNA_00963 | 9.32446E-05 | 1.02144E-04 | -1.3156E-01 | -4.9106E-02 |
| CCNA_00964 | 9.79126E-05 | 4.85351E-05 | 1.0123E+00  | 6.0321E-01  |
| CCNA_00965 | 1.85788E-04 | 3.57765E-05 | 2.3763E+00  | 1.3811E+00  |
| CCNA_00966 | 1.52273E-04 | 3.69398E-05 | 2.0431E+00  | 1.1911E+00  |
| CCNA_00967 | 1.21355E-04 | 9.92165E-05 | 2.9050E-01  | 1.9159E-01  |
| CCNA_00968 | 7.28874E-05 | 6.66372E-05 | 1.2924E-01  | 9.9625E-02  |
| CCNA_00969 | 3.44874E-05 | 1.26242E-04 | -1.8720E+00 | -1.0416E+00 |
| CCNA_00970 | 3.34973E-05 | 1.42258E-04 | -2.0863E+00 | -1.1639E+00 |
| CCNA_00971 | 8.30299E-05 | 5.05164E-05 | 7.1672E-01  | 4.3465E-01  |
| CCNA_00972 | 6.25794E-05 | 4.75669E-05 | 3.9557E-01  | 2.5151E-01  |
| CCNA_00973 | 1.60013E-04 | 6.03630E-05 | 1.4063E+00  | 8.2791E-01  |
| CCNA_00974 | 4.25563E-05 | 8.45892E-05 | -9.9113E-01 | -5.3930E-01 |
| CCNA_00975 | 2.48235E-05 | 8.71560E-05 | -1.8118E+00 | -1.0073E+00 |
| CCNA_00976 | 7.79887E-05 | 9.25296E-05 | -2.4671E-01 | -1.1477E-01 |
| CCNA_00977 | 1.88352E-03 | 3.00472E-04 | 2.6481E+00  | 1.5361E+00  |
| CCNA_00978 | 1.21531E-03 | 5.56934E-04 | 1.1257E+00  | 6.6790E-01  |
| CCNA_00979 | 1.12476E-04 | 1.22640E-04 | -1.2486E-01 | -4.5281E-02 |
| CCNA_00980 | 6.68380E-05 | 1.22692E-04 | -8.7633E-01 | -4.7383E-01 |
| CCNA_00981 | 6.44725E-05 | 1.33147E-04 | -1.0463E+00 | -5.7075E-01 |
| CCNA_00982 | 4.20627E-05 | 1.08876E-04 | -1.3721E+00 | -7.5653E-01 |
| CCNA_00983 | 1.80109E-04 | 1.47099E-04 | 2.9203E-01  | 1.9246E-01  |
| CCNA_00984 | 4.68841E-05 | 1.46191E-04 | -1.6407E+00 | -9.0971E-01 |
| CCNA_00985 | 2.93289E-05 | 1.03329E-04 | -1.8168E+00 | -1.0102E+00 |
| CCNA_00986 | 2.18620E-05 | 5.50794E-05 | -1.3331E+00 | -7.3431E-01 |
| CCNA_00987 | 1.92533E-04 | 7.93807E-05 | 1.2781E+00  | 7.5481E-01  |
| CCNA_00988 | 6.43581E-05 | 7.82850E-05 | -2.8269E-01 | -1.3529E-01 |
| CCNA_00989 | 1.12356E-04 | 1.16208E-04 | -4.8689E-02 | -1.8435E-03 |
| CCNA_00990 | 1.54476E-04 | 1.01663E-04 | 6.0350E-01  | 3.7009E-01  |
| CCNA_00991 | 8.06764E-05 | 7.45925E-05 | 1.1302E-01  | 9.0377E-02  |
| CCNA_00992 | 4.46450E-05 | 7.11402E-05 | -6.7222E-01 | -3.5743E-01 |
| CCNA_00993 | 1.92075E-05 | 9.96068E-05 | -2.3745E+00 | -1.3282E+00 |
| CCNA_00994 | 2.70145E-05 | 1.46506E-04 | -2.4391E+00 | -1.3650E+00 |
| CCNA_00995 | 2.72643E-05 | 1.34865E-04 | -2.3064E+00 | -1.2893E+00 |
| CCNA_00996 | 2.66684E-05 | 3.47408E-05 | -3.8165E-01 | -1.9172E-01 |
| CCNA_00997 | 1.31720E-04 | 9.76780E-05 | 4.3129E-01  | 2.7188E-01  |
| CCNA_00998 | 1.46034E-04 | 3.24142E-05 | 2.1713E+00  | 1.2642E+00  |
| CCNA_00999 | 7.50408E-04 | 3.09057E-05 | 4.6014E+00  | 2.6500E+00  |
| CCNA_01000 | 1.59592E-04 | 1.13243E-04 | 4.9489E-01  | 3.0815E-01  |
| CCNA_01001 | 1.36388E-04 | 1.28989E-04 | 8.0414E-02  | 7.1781E-02  |
| CCNA_01002 | 1.76100E-04 | 8.88221E-05 | 9.8731E-01  | 5.8896E-01  |
| CCNA_01003 | 2.26969E-04 | 7.99136E-05 | 1.5059E+00  | 8.8468E-01  |
| CCNA_01004 | 2.54913E-04 | 4.72817E-05 | 2.4304E+00  | 1.4119E+00  |
| CCNA_01005 | 2.61056E-04 | 7.95158E-05 | 1.7149E+00  | 1.0039E+00  |
| CCNA_01006 | 2.05570E-04 | 1.47099E-04 | 4.8280E-01  | 3.0125E-01  |

|            |             |             |             |             |
|------------|-------------|-------------|-------------|-------------|
| CCNA_01007 | 1.39440E-04 | 5.30981E-05 | 1.3927E+00  | 8.2017E-01  |
| CCNA_01008 | 1.89487E-05 | 8.26379E-05 | -2.1246E+00 | -1.1857E+00 |
| CCNA_01009 | 1.31256E-04 | 6.65396E-05 | 9.7997E-01  | 5.8478E-01  |
| CCNA_01010 | 2.11939E-05 | 7.16881E-05 | -1.7580E+00 | -9.7664E-01 |
| CCNA_01011 | 1.38476E-04 | 1.37597E-04 | 9.1413E-03  | 3.1136E-02  |
| CCNA_01012 | 3.33709E-05 | 1.47099E-04 | -2.1401E+00 | -1.1945E+00 |
| CCNA_01013 | 7.98638E-05 | 1.13431E-04 | -5.0624E-01 | -2.6278E-01 |
| CCNA_01014 | 1.70794E-04 | 7.08700E-05 | 1.2689E+00  | 7.4954E-01  |
| CCNA_01015 | 1.90652E-04 | 1.25462E-04 | 6.0363E-01  | 3.7016E-01  |
| CCNA_01016 | 4.25202E-05 | 1.08688E-04 | -1.3540E+00 | -7.4622E-01 |
| CCNA_01017 | 1.12281E-04 | 1.47384E-04 | -3.9251E-01 | -1.9791E-01 |
| CCNA_01018 | 7.62793E-05 | 6.60443E-05 | 2.0775E-01  | 1.4440E-01  |
| CCNA_01019 | 1.19082E-04 | 3.89661E-05 | 1.6114E+00  | 9.4488E-01  |
| CCNA_01020 | 3.33137E-05 | 1.14144E-04 | -1.7766E+00 | -9.8725E-01 |
| CCNA_01021 | 1.40351E-04 | 9.03006E-05 | 6.3615E-01  | 3.8870E-01  |
| CCNA_01022 | 9.00785E-05 | 1.03239E-04 | -1.9679E-01 | -8.6305E-02 |
| CCNA_01023 | 9.79908E-05 | 1.33237E-04 | -4.4331E-01 | -2.2689E-01 |
| CCNA_01024 | 1.29478E-04 | 1.47099E-04 | -1.8412E-01 | -7.9078E-02 |
| CCNA_01025 | 1.75402E-04 | 1.20058E-04 | 5.4687E-01  | 3.3779E-01  |
| CCNA_01026 | 3.90982E-05 | 8.84093E-05 | -1.1771E+00 | -6.4536E-01 |
| CCNA_01027 | 3.68049E-05 | 1.40367E-04 | -1.9312E+00 | -1.0754E+00 |
| CCNA_01028 | 1.86206E-05 | 1.13153E-04 | -2.6032E+00 | -1.4586E+00 |
| CCNA_01029 | 1.74132E-04 | 6.66447E-05 | 1.3855E+00  | 8.1603E-01  |
| CCNA_01030 | 2.09350E-05 | 3.84783E-05 | -8.7820E-01 | -4.7490E-01 |
| CCNA_01031 | 2.00291E-05 | 4.29588E-05 | -1.1009E+00 | -6.0189E-01 |
| CCNA_01032 | 5.51546E-05 | 8.61278E-05 | -6.4304E-01 | -3.4079E-01 |
| CCNA_01033 | 1.07917E-04 | 1.32231E-04 | -2.9319E-01 | -1.4128E-01 |
| CCNA_01034 | 9.78012E-05 | 8.24728E-05 | 2.4585E-01  | 1.6612E-01  |
| CCNA_01035 | 2.53261E-05 | 6.07007E-05 | -1.2611E+00 | -6.9325E-01 |
| CCNA_01036 | 2.33247E-05 | 1.37973E-04 | -2.5643E+00 | -1.4365E+00 |
| CCNA_01037 | 1.37586E-04 | 8.00562E-05 | 7.8114E-01  | 4.7139E-01  |
| CCNA_01038 | 2.28251E-05 | 5.51020E-05 | -1.2715E+00 | -6.9918E-01 |
| CCNA_01039 | 2.21509E-05 | 6.73277E-05 | -1.6038E+00 | -8.8869E-01 |
| CCNA_01040 | 2.08387E-05 | 5.72484E-05 | -1.4579E+00 | -8.0551E-01 |
| CCNA_01041 | 1.62331E-04 | 8.22251E-05 | 9.8118E-01  | 5.8547E-01  |
| CCNA_01042 | 2.47001E-05 | 1.43534E-04 | -2.5387E+00 | -1.4218E+00 |
| CCNA_01043 | 2.27318E-05 | 6.86110E-05 | -1.5937E+00 | -8.8293E-01 |
| CCNA_01044 | 2.35835E-05 | 9.04131E-05 | -1.9387E+00 | -1.0797E+00 |
| CCNA_01045 | 1.85466E-04 | 1.25687E-04 | 5.6126E-01  | 3.4600E-01  |
| CCNA_01046 | 1.46169E-04 | 1.12553E-04 | 3.7697E-01  | 2.4090E-01  |
| CCNA_01047 | 2.11156E-04 | 4.61935E-05 | 2.1923E+00  | 1.2762E+00  |
| CCNA_01048 | 1.34660E-04 | 3.23542E-05 | 2.0570E+00  | 1.1990E+00  |
| CCNA_01049 | 2.22864E-05 | 6.55940E-05 | -1.5574E+00 | -8.6221E-01 |
| CCNA_01050 | 2.98535E-04 | 6.89562E-05 | 2.1140E+00  | 1.2315E+00  |
| CCNA_01051 | 1.18213E-04 | 1.45500E-04 | -2.9967E-01 | -1.4498E-01 |
| CCNA_01052 | 2.16754E-05 | 6.14662E-05 | -1.5037E+00 | -8.3161E-01 |
| CCNA_01053 | 5.53623E-05 | 7.94258E-05 | -5.2076E-01 | -2.7106E-01 |
| CCNA_01054 | 1.30817E-04 | 1.13499E-04 | 2.0481E-01  | 1.4272E-01  |
| CCNA_01055 | 3.91975E-05 | 5.59725E-05 | -5.1404E-01 | -2.6722E-01 |
| CCNA_01056 | 2.47206E-04 | 1.18865E-04 | 1.0563E+00  | 6.2832E-01  |
| CCNA_01057 | 2.39868E-05 | 1.13251E-04 | -2.2391E+00 | -1.2510E+00 |
| CCNA_01058 | 6.87973E-05 | 2.76185E-05 | 1.3164E+00  | 7.7663E-01  |
| CCNA_01059 | 4.57706E-05 | 4.65312E-07 | 6.5971E+00  | 3.7881E+00  |

|            |             |             |             |             |
|------------|-------------|-------------|-------------|-------------|
| CCNA_01060 | 7.24962E-05 | 9.89013E-05 | -4.4813E-01 | -2.2964E-01 |
| CCNA_01061 | 1.74135E-04 | 8.24428E-05 | 1.0786E+00  | 6.4104E-01  |
| CCNA_01062 | 1.56519E-04 | 1.33612E-04 | 2.2824E-01  | 1.5608E-01  |
| CCNA_01063 | 2.10855E-05 | 1.47399E-04 | -2.8053E+00 | -1.5739E+00 |
| CCNA_01064 | 1.13147E-04 | 1.43226E-04 | -3.4013E-01 | -1.6805E-01 |
| CCNA_01065 | 2.29124E-05 | 1.47234E-04 | -2.6838E+00 | -1.5046E+00 |
| CCNA_01066 | 1.51288E-04 | 1.47099E-04 | 4.0473E-02  | 4.9003E-02  |
| CCNA_01067 | 1.09587E-04 | 1.47099E-04 | -4.2474E-01 | -2.1630E-01 |
| CCNA_01068 | 2.23014E-05 | 5.58825E-05 | -1.3253E+00 | -7.2984E-01 |
| CCNA_01069 | 1.51114E-05 | 1.22572E-04 | -3.0197E+00 | -1.6962E+00 |
| CCNA_01070 | 3.74059E-04 | 7.39621E-05 | 2.3383E+00  | 1.3594E+00  |
| CCNA_01071 | 2.64315E-04 | 1.00597E-04 | 1.3936E+00  | 8.2065E-01  |
| CCNA_01072 | 2.54426E-04 | 4.00469E-05 | 2.6672E+00  | 1.5470E+00  |
| CCNA_01073 | 4.53462E-05 | 9.43458E-05 | -1.0570E+00 | -5.7686E-01 |
| CCNA_01074 | 3.02348E-05 | 9.03681E-05 | -1.5796E+00 | -8.7488E-01 |
| CCNA_01075 | 2.36407E-05 | 5.50869E-05 | -1.2205E+00 | -6.7007E-01 |
| CCNA_01076 | 4.84070E-05 | 6.27496E-05 | -3.7447E-01 | -1.8763E-01 |
| CCNA_01077 | 4.56382E-05 | 1.47084E-04 | -1.6883E+00 | -9.3688E-01 |
| CCNA_01078 | 4.13404E-05 | 1.31646E-04 | -1.6710E+00 | -9.2702E-01 |
| CCNA_01079 | 4.28121E-05 | 1.07517E-04 | -1.3285E+00 | -7.3168E-01 |
| CCNA_01080 | 2.59581E-05 | 6.12186E-05 | -1.2378E+00 | -6.7996E-01 |
| CCNA_01081 | 1.65572E-04 | 3.38327E-05 | 2.2907E+00  | 1.3322E+00  |
| CCNA_01082 | 8.42277E-05 | 6.29222E-05 | 4.2061E-01  | 2.6578E-01  |
| CCNA_01083 | 8.71952E-05 | 6.88287E-05 | 3.4113E-01  | 2.2046E-01  |
| CCNA_01084 | 3.83669E-05 | 8.66831E-05 | -1.1759E+00 | -6.4467E-01 |
| CCNA_01085 | 2.20447E-04 | 1.18392E-04 | 8.9679E-01  | 5.3734E-01  |
| CCNA_01086 | 2.36798E-05 | 1.02811E-04 | -2.1182E+00 | -1.1820E+00 |
| CCNA_01087 | 2.31772E-05 | 1.06684E-04 | -2.2025E+00 | -1.2301E+00 |
| CCNA_01088 | 5.43179E-05 | 7.74444E-05 | -5.1179E-01 | -2.6594E-01 |
| CCNA_01089 | 1.07396E-04 | 1.36351E-04 | -3.4443E-01 | -1.7050E-01 |
| CCNA_01090 | 1.41838E-04 | 6.03705E-05 | 1.2322E+00  | 7.2861E-01  |
| CCNA_01091 | 3.75302E-05 | 4.29963E-05 | -1.9630E-01 | -8.6022E-02 |
| CCNA_01092 | 2.44142E-05 | 1.47076E-04 | -2.5907E+00 | -1.4515E+00 |
| CCNA_01093 | 2.21058E-05 | 5.63478E-05 | -1.3499E+00 | -7.4391E-01 |
| CCNA_01094 | 2.72463E-05 | 7.08175E-05 | -1.3780E+00 | -7.5994E-01 |
| CCNA_01095 | 2.40952E-05 | 1.32471E-04 | -2.4588E+00 | -1.3763E+00 |
| CCNA_01096 | 1.69834E-05 | 1.23488E-04 | -2.8620E+00 | -1.6062E+00 |
| CCNA_01097 | 7.37933E-05 | 1.47331E-04 | -9.9752E-01 | -5.4294E-01 |
| CCNA_01098 | 1.16545E-04 | 7.10952E-05 | 7.1295E-01  | 4.3250E-01  |
| CCNA_01099 | 1.71920E-04 | 9.29799E-05 | 8.8665E-01  | 5.3156E-01  |
| CCNA_01100 | 2.35474E-05 | 1.20471E-04 | -2.3549E+00 | -1.3171E+00 |
| CCNA_01101 | 1.27479E-04 | 7.49453E-05 | 7.6624E-01  | 4.6289E-01  |
| CCNA_01102 | 1.28174E-04 | 4.43322E-05 | 1.5315E+00  | 8.9929E-01  |
| CCNA_01103 | 3.89989E-05 | 9.92090E-05 | -1.3470E+00 | -7.4226E-01 |
| CCNA_01104 | 4.32533E-04 | 1.30760E-04 | 1.7258E+00  | 1.0101E+00  |
| CCNA_01105 | 3.61774E-04 | 1.35203E-04 | 1.4199E+00  | 8.3565E-01  |
| CCNA_01106 | 1.56239E-04 | 6.67948E-05 | 1.2258E+00  | 7.2498E-01  |
| CCNA_01107 | 3.65966E-04 | 8.07692E-05 | 2.1797E+00  | 1.2690E+00  |
| CCNA_01108 | 4.03749E-04 | 1.46025E-04 | 1.4672E+00  | 8.6262E-01  |
| CCNA_01109 | 6.08693E-04 | 7.28439E-05 | 3.0627E+00  | 1.7725E+00  |
| CCNA_01110 | 3.81833E-05 | 1.28103E-04 | -1.7463E+00 | -9.6993E-01 |
| CCNA_01111 | 1.32051E-04 | 1.30835E-04 | 1.3293E-02  | 3.3503E-02  |
| CCNA_01112 | 2.22593E-05 | 3.77803E-05 | -7.6332E-01 | -4.0938E-01 |

|            |             |             |             |             |
|------------|-------------|-------------|-------------|-------------|
| CCNA_01113 | 1.48496E-05 | 2.42413E-05 | -7.0720E-01 | -3.7738E-01 |
| CCNA_01114 | 4.88103E-05 | 1.26790E-04 | -1.3772E+00 | -7.5945E-01 |
| CCNA_01115 | 3.80596E-04 | 2.33932E-05 | 4.0236E+00  | 2.3205E+00  |
| CCNA_01116 | 4.05248E-04 | 4.35592E-05 | 3.2175E+00  | 1.8608E+00  |
| CCNA_01117 | 1.29255E-04 | 3.41479E-05 | 1.9201E+00  | 1.1209E+00  |
| CCNA_01118 | 1.10484E-04 | 4.12927E-05 | 1.4197E+00  | 8.3552E-01  |
| CCNA_01119 | 1.27425E-04 | 1.43819E-04 | -1.7465E-01 | -7.3674E-02 |
| CCNA_01120 | 4.31420E-04 | 1.29852E-04 | 1.7321E+00  | 1.0137E+00  |
| CCNA_01121 | 4.83330E-04 | 5.48768E-05 | 3.1386E+00  | 1.8158E+00  |
| CCNA_01122 | 5.40561E-05 | 6.31549E-05 | -2.2453E-01 | -1.0212E-01 |
| CCNA_01123 | 5.32315E-05 | 1.14955E-04 | -1.1107E+00 | -6.0750E-01 |
| CCNA_01124 | 1.77569E-05 | 9.21618E-05 | -2.3757E+00 | -1.3289E+00 |
| CCNA_01125 | 1.15359E-04 | 1.46146E-04 | -3.4131E-01 | -1.6872E-01 |
| CCNA_01126 | 3.84963E-05 | 5.43364E-05 | -4.9729E-01 | -2.5767E-01 |
| CCNA_01127 | 1.21015E-04 | 6.93090E-05 | 8.0395E-01  | 4.8439E-01  |
| CCNA_01128 | 4.64929E-05 | 8.62478E-05 | -8.9151E-01 | -4.8249E-01 |
| CCNA_01129 | 3.50424E-04 | 1.47099E-04 | 1.2523E+00  | 7.4006E-01  |
| CCNA_01130 | 3.43978E-04 | 5.26103E-05 | 2.7087E+00  | 1.5706E+00  |
| CCNA_01131 | 3.07483E-04 | 1.47099E-04 | 1.0637E+00  | 6.3250E-01  |
| CCNA_01132 | 1.10369E-04 | 1.00597E-04 | 1.3368E-01  | 1.0216E-01  |
| CCNA_01133 | 9.27691E-05 | 1.11450E-04 | -2.6473E-01 | -1.2505E-01 |
| CCNA_01134 | 6.49329E-05 | 7.13879E-05 | -1.3681E-01 | -5.2099E-02 |
| CCNA_01135 | 8.91515E-05 | 8.19775E-05 | 1.2095E-01  | 9.4896E-02  |
| CCNA_01136 | 1.10418E-04 | 1.47039E-04 | -4.1326E-01 | -2.0975E-01 |
| CCNA_01137 | 1.21580E-04 | 8.05515E-05 | 5.9383E-01  | 3.6457E-01  |
| CCNA_01138 | 1.84452E-04 | 2.20948E-05 | 3.0610E+00  | 1.7715E+00  |
| CCNA_01139 | 2.42276E-05 | 9.23795E-05 | -1.9309E+00 | -1.0752E+00 |
| CCNA_01140 | 2.99615E-04 | 9.66498E-05 | 1.6322E+00  | 9.5672E-01  |
| CCNA_01141 | 2.88979E-04 | 1.06144E-04 | 1.4449E+00  | 8.4989E-01  |
| CCNA_01142 | 1.77578E-04 | 1.00117E-04 | 8.2668E-01  | 4.9736E-01  |
| CCNA_01143 | 3.56522E-05 | 7.96209E-05 | -1.1592E+00 | -6.3513E-01 |
| CCNA_01144 | 9.29858E-05 | 1.40277E-04 | -5.9322E-01 | -3.1238E-01 |
| CCNA_01145 | 1.80638E-04 | 4.44898E-05 | 2.0213E+00  | 1.1786E+00  |
| CCNA_01146 | 5.80379E-05 | 8.15947E-05 | -4.9154E-01 | -2.5439E-01 |
| CCNA_01147 | 1.93616E-04 | 6.78905E-05 | 1.5118E+00  | 8.8806E-01  |
| CCNA_01148 | 1.68525E-04 | 8.87620E-05 | 9.2485E-01  | 5.5334E-01  |
| CCNA_01149 | 1.37832E-04 | 4.92555E-05 | 1.4844E+00  | 8.7242E-01  |
| CCNA_01150 | 2.94439E-04 | 4.98935E-05 | 2.5608E+00  | 1.4863E+00  |
| CCNA_01151 | 7.62552E-05 | 4.79422E-05 | 6.6937E-01  | 4.0765E-01  |
| CCNA_01152 | 4.60715E-05 | 1.47099E-04 | -1.6748E+00 | -9.2919E-01 |
| CCNA_01153 | 1.82715E-05 | 1.21004E-04 | -2.7272E+00 | -1.5294E+00 |
| CCNA_01154 | 5.70447E-05 | 1.47099E-04 | -1.3666E+00 | -7.5343E-01 |
| CCNA_01155 | 2.82051E-04 | 6.06182E-05 | 2.2180E+00  | 1.2908E+00  |
| CCNA_01156 | 2.46971E-05 | 1.13979E-04 | -2.2063E+00 | -1.2323E+00 |
| CCNA_01157 | 7.71701E-05 | 3.89436E-05 | 9.8643E-01  | 5.8846E-01  |
| CCNA_01158 | 2.41343E-05 | 1.38445E-04 | -2.5201E+00 | -1.4112E+00 |
| CCNA_01159 | 1.94949E-04 | 1.47099E-04 | 4.0626E-01  | 2.5761E-01  |
| CCNA_01160 | 2.00923E-05 | 1.21116E-04 | -2.5915E+00 | -1.4520E+00 |
| CCNA_01161 | 8.41856E-05 | 1.02969E-04 | -2.9062E-01 | -1.3981E-01 |
| CCNA_01162 | 4.02461E-04 | 1.14182E-04 | 1.8174E+00  | 1.0624E+00  |
| CCNA_01163 | 1.28069E-04 | 1.12088E-04 | 1.9223E-01  | 1.3555E-01  |
| CCNA_01164 | 1.23299E-04 | 1.09003E-04 | 1.7773E-01  | 1.2728E-01  |
| CCNA_01165 | 3.89899E-05 | 5.50569E-05 | -4.9791E-01 | -2.5802E-01 |

|            |             |             |             |             |
|------------|-------------|-------------|-------------|-------------|
| CCNA_01166 | 1.98636E-05 | 1.29589E-04 | -2.7056E+00 | -1.5170E+00 |
| CCNA_01167 | 2.12932E-05 | 1.69794E-04 | -2.9952E+00 | -1.6822E+00 |
| CCNA_01168 | 8.89529E-05 | 1.45575E-04 | -7.1068E-01 | -3.7936E-01 |
| CCNA_01169 | 1.04549E-04 | 7.70167E-05 | 4.4084E-01  | 2.7732E-01  |
| CCNA_01170 | 3.07919E-04 | 7.00820E-05 | 2.1353E+00  | 1.2436E+00  |
| CCNA_01171 | 3.49961E-04 | 4.33191E-05 | 3.0139E+00  | 1.7447E+00  |
| CCNA_01172 | 6.71781E-05 | 8.92649E-05 | -4.1016E-01 | -2.0798E-01 |
| CCNA_01173 | 3.73644E-04 | 1.12013E-04 | 1.7379E+00  | 1.0170E+00  |
| CCNA_01174 | 5.08418E-05 | 3.08082E-05 | 7.2244E-01  | 4.3791E-01  |
| CCNA_01175 | 5.08839E-05 | 3.26769E-05 | 6.3869E-01  | 3.9015E-01  |
| CCNA_01176 | 1.52589E-05 | 7.74595E-05 | -2.3436E+00 | -1.3106E+00 |
| CCNA_01177 | 1.90811E-05 | 8.43641E-05 | -2.1444E+00 | -1.1970E+00 |
| CCNA_01178 | 1.25379E-04 | 1.29912E-04 | -5.1295E-02 | -3.3298E-03 |
| CCNA_01179 | 7.48467E-05 | 1.47384E-04 | -9.7758E-01 | -5.3157E-01 |
| CCNA_01180 | 5.74329E-05 | 1.44742E-04 | -1.3335E+00 | -7.3456E-01 |
| CCNA_01181 | 6.21659E-04 | 1.46003E-04 | 2.0901E+00  | 1.2178E+00  |
| CCNA_01182 | 6.22014E-04 | 1.44569E-04 | 2.1051E+00  | 1.2264E+00  |
| CCNA_01183 | 2.49619E-04 | 1.46498E-04 | 7.6879E-01  | 4.6435E-01  |
| CCNA_01184 | 2.00529E-04 | 1.32464E-04 | 5.9815E-01  | 3.6704E-01  |
| CCNA_01185 | 2.26355E-05 | 3.85609E-05 | -7.6864E-01 | -4.1242E-01 |
| CCNA_01186 | 2.42848E-05 | 2.55171E-05 | -7.1659E-02 | -1.4943E-02 |
| CCNA_01187 | 2.05558E-05 | 2.57873E-05 | -3.2732E-01 | -1.6074E-01 |
| CCNA_01188 | 1.57615E-05 | 1.39414E-04 | -3.1447E+00 | -1.7674E+00 |
| CCNA_01189 | 1.76539E-04 | 6.95191E-05 | 1.3444E+00  | 7.9259E-01  |
| CCNA_01190 | 7.21049E-05 | 8.63379E-05 | -2.5996E-01 | -1.2233E-01 |
| CCNA_01191 | 1.63149E-04 | 7.70392E-05 | 1.0824E+00  | 6.4320E-01  |
| CCNA_01192 | 6.06653E-05 | 1.18234E-04 | -9.6273E-01 | -5.2310E-01 |
| CCNA_01193 | 1.49275E-04 | 1.42385E-04 | 6.8124E-02  | 6.4772E-02  |
| CCNA_01194 | 1.29369E-04 | 8.48819E-05 | 6.0787E-01  | 3.7258E-01  |
| CCNA_01195 | 2.17473E-04 | 4.81673E-05 | 2.1745E+00  | 1.2660E+00  |
| CCNA_01196 | 2.14301E-04 | 4.24635E-05 | 2.3351E+00  | 1.3576E+00  |
| CCNA_01197 | 9.90983E-05 | 1.47346E-04 | -5.7231E-01 | -3.0045E-01 |
| CCNA_01198 | 9.86981E-05 | 1.47346E-04 | -5.7815E-01 | -3.0378E-01 |
| CCNA_01199 | 6.90200E-05 | 5.85543E-05 | 2.3712E-01  | 1.6115E-01  |
| CCNA_01200 | 9.16044E-05 | 7.92081E-05 | 2.0968E-01  | 1.4550E-01  |
| CCNA_01201 | 2.98255E-05 | 3.94915E-05 | -4.0512E-01 | -2.0511E-01 |
| CCNA_01202 | 3.68651E-05 | 1.44705E-04 | -1.9727E+00 | -1.0991E+00 |
| CCNA_01203 | 3.58960E-05 | 9.77981E-05 | -1.4460E+00 | -7.9868E-01 |
| CCNA_01204 | 5.31598E-04 | 1.23210E-04 | 2.1091E+00  | 1.2287E+00  |
| CCNA_01205 | 5.65017E-04 | 1.46078E-04 | 1.9515E+00  | 1.1388E+00  |
| CCNA_01206 | 1.52679E-05 | 6.16388E-05 | -2.0132E+00 | -1.1222E+00 |
| CCNA_01207 | 2.32795E-05 | 6.60893E-05 | -1.5053E+00 | -8.3253E-01 |
| CCNA_01208 | 2.09742E-05 | 3.16412E-05 | -5.9333E-01 | -3.1244E-01 |
| CCNA_01209 | 1.54725E-05 | 5.86443E-05 | -1.9222E+00 | -1.0703E+00 |
| CCNA_01210 | 4.77807E-04 | 8.81841E-05 | 2.4377E+00  | 1.4161E+00  |
| CCNA_01211 | 5.79656E-05 | 6.65546E-05 | -1.9943E-01 | -8.7808E-02 |
| CCNA_01212 | 3.44847E-04 | 9.68750E-05 | 1.8317E+00  | 1.0705E+00  |
| CCNA_01213 | 1.71038E-05 | 1.07802E-04 | -2.6558E+00 | -1.4886E+00 |
| CCNA_01214 | 8.15431E-05 | 9.58318E-05 | -2.3300E-01 | -1.0695E-01 |
| CCNA_01215 | 4.22884E-05 | 3.73450E-05 | 1.7916E-01  | 1.2809E-01  |
| CCNA_01216 | 3.53921E-04 | 1.38701E-04 | 1.3514E+00  | 7.9659E-01  |
| CCNA_01217 | 2.82421E-04 | 8.90697E-05 | 1.6647E+00  | 9.7528E-01  |
| CCNA_01218 | 7.48557E-05 | 7.92832E-05 | -8.2981E-02 | -2.1400E-02 |

|            |             |             |             |             |
|------------|-------------|-------------|-------------|-------------|
| CCNA_01219 | 3.69794E-05 | 1.43496E-04 | -1.9562E+00 | -1.0896E+00 |
| CCNA_01220 | 4.98748E-04 | 8.92348E-05 | 2.4825E+00  | 1.4416E+00  |
| CCNA_01221 | 3.03483E-04 | 1.09844E-04 | 1.4661E+00  | 8.6199E-01  |
| CCNA_01222 | 1.34128E-04 | 1.22752E-04 | 1.2780E-01  | 9.8803E-02  |
| CCNA_01223 | 1.36234E-04 | 4.84825E-05 | 1.4904E+00  | 8.7584E-01  |
| CCNA_01224 | 3.65879E-04 | 1.47099E-04 | 1.3145E+00  | 7.7556E-01  |
| CCNA_01225 | 6.30670E-05 | 9.09985E-05 | -5.2901E-01 | -2.7576E-01 |
| CCNA_01226 | 5.98316E-05 | 5.21074E-05 | 1.9928E-01  | 1.3957E-01  |
| CCNA_01227 | 5.28854E-05 | 3.85459E-05 | 4.5609E-01  | 2.8602E-01  |
| CCNA_01228 | 9.67358E-05 | 4.60359E-05 | 1.0711E+00  | 6.3675E-01  |
| CCNA_01229 | 7.42869E-05 | 6.64421E-05 | 1.6091E-01  | 1.1768E-01  |
| CCNA_01230 | 1.13424E-04 | 1.32239E-05 | 3.0997E+00  | 1.7936E+00  |
| CCNA_01231 | 3.72954E-05 | 1.04763E-04 | -1.4900E+00 | -8.2382E-01 |
| CCNA_01232 | 2.21660E-05 | 1.47099E-04 | -2.7302E+00 | -1.5311E+00 |
| CCNA_01233 | 1.85111E-04 | 3.53787E-05 | 2.3872E+00  | 1.3873E+00  |
| CCNA_01234 | 1.91500E-04 | 6.30798E-05 | 1.6019E+00  | 9.3948E-01  |
| CCNA_01235 | 2.59762E-05 | 1.11592E-04 | -2.1029E+00 | -1.1733E+00 |
| CCNA_01236 | 2.80649E-05 | 1.30850E-04 | -2.2210E+00 | -1.2407E+00 |
| CCNA_01237 | 2.60996E-05 | 1.00868E-04 | -1.9503E+00 | -1.0863E+00 |
| CCNA_01238 | 2.25482E-05 | 4.23434E-05 | -9.0919E-01 | -4.9257E-01 |
| CCNA_01239 | 4.48165E-05 | 1.22752E-04 | -1.4536E+00 | -8.0306E-01 |
| CCNA_01240 | 1.53762E-04 | 1.25942E-04 | 2.8789E-01  | 1.9010E-01  |
| CCNA_01241 | 1.52829E-05 | 7.30690E-05 | -2.2572E+00 | -1.2613E+00 |
| CCNA_01242 | 1.55379E-04 | 9.72352E-05 | 6.7615E-01  | 4.1152E-01  |
| CCNA_01243 | 8.54617E-05 | 1.47099E-04 | -7.8346E-01 | -4.2087E-01 |
| CCNA_01244 | 1.09641E-04 | 1.23563E-04 | -1.7250E-01 | -7.2453E-02 |
| CCNA_01245 | 6.38585E-05 | 1.13191E-04 | -8.2584E-01 | -4.4503E-01 |
| CCNA_01246 | 1.66313E-05 | 8.09343E-05 | -2.2827E+00 | -1.2759E+00 |
| CCNA_01247 | 1.19690E-04 | 2.90220E-05 | 2.0438E+00  | 1.1914E+00  |
| CCNA_01248 | 1.12624E-04 | 3.99943E-05 | 1.4934E+00  | 8.7758E-01  |
| CCNA_01249 | 1.38720E-04 | 7.72418E-05 | 8.4462E-01  | 5.0759E-01  |
| CCNA_01250 | 1.90570E-05 | 3.12960E-05 | -7.1577E-01 | -3.8227E-01 |
| CCNA_01251 | 1.64808E-05 | 9.90589E-05 | -2.5873E+00 | -1.4496E+00 |
| CCNA_01252 | 2.15319E-04 | 7.71893E-05 | 1.4799E+00  | 8.6986E-01  |
| CCNA_01253 | 2.14404E-04 | 7.81349E-05 | 1.4562E+00  | 8.5634E-01  |
| CCNA_01254 | 2.04896E-04 | 1.45965E-04 | 4.8921E-01  | 3.0491E-01  |
| CCNA_01255 | 1.73897E-04 | 7.49678E-05 | 1.2138E+00  | 7.1811E-01  |
| CCNA_01256 | 2.00442E-05 | 1.20583E-04 | -2.5886E+00 | -1.4503E+00 |
| CCNA_01257 | 2.91514E-05 | 1.02144E-04 | -1.8089E+00 | -1.0057E+00 |
| CCNA_01258 | 2.43642E-04 | 1.08635E-04 | 1.1652E+00  | 6.9040E-01  |
| CCNA_01259 | 2.36470E-04 | 1.24546E-04 | 9.2491E-01  | 5.5338E-01  |
| CCNA_01260 | 1.77830E-04 | 1.11074E-05 | 4.0000E+00  | 2.3070E+00  |
| CCNA_01261 | 3.11696E-04 | 1.21109E-04 | 1.3638E+00  | 8.0365E-01  |
| CCNA_01262 | 2.13353E-05 | 3.52962E-05 | -7.2637E-01 | -3.8831E-01 |
| CCNA_01263 | 1.05404E-04 | 1.45860E-04 | -4.6870E-01 | -2.4137E-01 |
| CCNA_01264 | 1.47707E-03 | 4.10623E-04 | 1.8468E+00  | 1.0791E+00  |
| CCNA_01265 | 1.54491E-03 | 2.52957E-04 | 2.6105E+00  | 1.5146E+00  |
| CCNA_01266 | 4.92678E-05 | 1.33447E-04 | -1.4375E+00 | -7.9388E-01 |
| CCNA_01267 | 2.35874E-04 | 8.04014E-05 | 1.5526E+00  | 9.1134E-01  |
| CCNA_01268 | 1.71874E-04 | 4.27111E-05 | 2.0084E+00  | 1.1713E+00  |
| CCNA_01269 | 1.72621E-04 | 4.31539E-05 | 1.9998E+00  | 1.1664E+00  |
| CCNA_01270 | 1.92015E-05 | 6.69074E-05 | -1.8009E+00 | -1.0011E+00 |
| CCNA_01271 | 1.84100E-05 | 1.47391E-04 | -3.0009E+00 | -1.6854E+00 |



|            |             |             |             |             |
|------------|-------------|-------------|-------------|-------------|
| CCNA_01272 | 1.87440E-05 | 1.11750E-04 | -2.5756E+00 | -1.4429E+00 |
| CCNA_01273 | 4.28572E-05 | 3.48834E-05 | 2.9679E-01  | 1.9517E-01  |
| CCNA_01274 | 2.28850E-04 | 1.33117E-04 | 7.8165E-01  | 4.7168E-01  |
| CCNA_01275 | 2.19487E-04 | 9.10961E-05 | 1.2686E+00  | 7.4936E-01  |
| CCNA_01276 | 2.04776E-05 | 1.05761E-04 | -2.3686E+00 | -1.3248E+00 |
| CCNA_01277 | 1.28906E-04 | 5.11393E-05 | 1.3336E+00  | 7.8646E-01  |
| CCNA_01278 | 1.47370E-04 | 1.46138E-04 | 1.2066E-02  | 3.2803E-02  |
| CCNA_01279 | 2.33115E-04 | 6.99169E-05 | 1.7372E+00  | 1.0166E+00  |
| CCNA_01280 | 1.55809E-04 | 8.17974E-05 | 9.2955E-01  | 5.5602E-01  |
| CCNA_01281 | 1.65494E-04 | 9.44133E-05 | 8.0963E-01  | 4.8764E-01  |
| CCNA_01282 | 1.44974E-05 | 3.97166E-05 | -1.4539E+00 | -8.0322E-01 |
| CCNA_01283 | 2.96690E-05 | 1.16718E-04 | -1.9759E+00 | -1.1009E+00 |
| CCNA_01284 | 1.53233E-04 | 1.16381E-04 | 3.9681E-01  | 2.5221E-01  |
| CCNA_01285 | 4.00718E-04 | 7.87878E-05 | 2.3464E+00  | 1.3640E+00  |
| CCNA_01286 | 3.67347E-04 | 1.39646E-04 | 1.3953E+00  | 8.2163E-01  |
| CCNA_01287 | 7.46541E-05 | 3.04704E-05 | 1.2925E+00  | 7.6301E-01  |
| CCNA_01288 | 8.38305E-05 | 6.14437E-05 | 4.4808E-01  | 2.8146E-01  |
| CCNA_01289 | 3.28562E-05 | 1.47384E-04 | -2.1653E+00 | -1.2089E+00 |
| CCNA_01290 | 5.07967E-05 | 1.24546E-04 | -1.2939E+00 | -7.1195E-01 |
| CCNA_01291 | 1.23347E-04 | 1.47099E-04 | -2.5410E-01 | -1.1899E-01 |
| CCNA_01292 | 2.05540E-04 | 5.13119E-05 | 2.0019E+00  | 1.1675E+00  |
| CCNA_01293 | 0.00000E+00 | 0.00000E+00 | -1.3183E+00 | -7.2586E-01 |
| CCNA_01294 | 5.92598E-06 | 6.37928E-07 | 3.1994E+00  | 1.8505E+00  |
| CCNA_01295 | 1.60865E-05 | 6.33125E-05 | -1.9765E+00 | -1.1013E+00 |
| CCNA_01296 | 1.45046E-04 | 1.04282E-04 | 4.7595E-01  | 2.9734E-01  |
| CCNA_01297 | 1.96499E-04 | 3.80430E-05 | 2.3686E+00  | 1.3767E+00  |
| CCNA_01298 | 2.50489E-04 | 1.81532E-04 | 4.6448E-01  | 2.9081E-01  |
| CCNA_01299 | 6.13123E-05 | 1.66492E-04 | -1.4412E+00 | -7.9596E-01 |
| CCNA_01300 | 4.67427E-05 | 4.28838E-05 | 1.2415E-01  | 9.6722E-02  |
| CCNA_01301 | 2.84411E-05 | 7.76171E-05 | -1.4484E+00 | -8.0006E-01 |
| CCNA_01302 | 2.90099E-05 | 2.93147E-05 | -1.5297E-02 | 1.7199E-02  |
| CCNA_01303 | 2.34661E-05 | 4.59833E-05 | -9.7058E-01 | -5.2758E-01 |
| CCNA_01304 | 1.66785E-04 | 1.42108E-04 | 2.3095E-01  | 1.5763E-01  |
| CCNA_01305 | 2.63325E-04 | 3.46207E-05 | 2.9268E+00  | 1.6950E+00  |
| CCNA_01306 | 3.37146E-04 | 1.37710E-04 | 1.2917E+00  | 7.6254E-01  |
| CCNA_01307 | 5.65270E-05 | 8.17073E-05 | -5.3158E-01 | -2.7723E-01 |
| CCNA_01308 | 7.67879E-05 | 8.44842E-05 | -1.3787E-01 | -5.2704E-02 |
| CCNA_01309 | 5.55639E-05 | 1.47324E-04 | -1.4068E+00 | -7.7632E-01 |
| CCNA_01310 | 5.17327E-05 | 3.34124E-05 | 6.3045E-01  | 3.8545E-01  |
| CCNA_01311 | 2.66314E-04 | 1.17236E-04 | 1.1836E+00  | 7.0092E-01  |
| CCNA_01312 | 3.81727E-04 | 6.38228E-05 | 2.5802E+00  | 1.4974E+00  |
| CCNA_01313 | 1.78369E-04 | 1.12808E-04 | 6.6092E-01  | 4.0283E-01  |
| CCNA_01314 | 6.66213E-05 | 5.16421E-05 | 3.6729E-01  | 2.3538E-01  |
| CCNA_01315 | 6.38013E-05 | 1.19713E-04 | -9.0794E-01 | -4.9186E-01 |
| CCNA_01316 | 1.13415E-04 | 9.15914E-05 | 3.0825E-01  | 2.0171E-01  |
| CCNA_01317 | 2.25314E-04 | 1.36749E-04 | 7.2034E-01  | 4.3672E-01  |
| CCNA_01318 | 2.06952E-04 | 6.60743E-05 | 1.6470E+00  | 9.6516E-01  |
| CCNA_01319 | 7.68270E-05 | 8.67282E-05 | -1.7496E-01 | -7.3850E-02 |
| CCNA_01320 | 3.46710E-05 | 1.45845E-04 | -2.0726E+00 | -1.1560E+00 |
| CCNA_01321 | 4.81813E-05 | 1.46401E-04 | -1.6034E+00 | -8.8844E-01 |
| CCNA_01322 | 1.83835E-04 | 1.41898E-04 | 3.7351E-01  | 2.3892E-01  |
| CCNA_01323 | 5.34000E-05 | 3.58816E-05 | 5.7338E-01  | 3.5291E-01  |
| CCNA_01324 | 7.81302E-05 | 4.45799E-05 | 8.0930E-01  | 4.8745E-01  |

|            |             |             |             |             |
|------------|-------------|-------------|-------------|-------------|
| CCNA_01325 | 1.24009E-04 | 1.46926E-04 | -2.4468E-01 | -1.1361E-01 |
| CCNA_01326 | 1.48739E-04 | 1.28779E-04 | 2.0784E-01  | 1.4445E-01  |
| CCNA_01327 | 2.30830E-04 | 1.97307E-05 | 3.5478E+00  | 2.0491E+00  |
| CCNA_01328 | 3.79302E-04 | 8.43791E-05 | 2.1683E+00  | 1.2624E+00  |
| CCNA_01329 | 6.25463E-05 | 7.12978E-05 | -1.8902E-01 | -8.1869E-02 |
| CCNA_01330 | 1.70947E-04 | 1.31075E-04 | 3.8310E-01  | 2.4439E-01  |
| CCNA_01331 | 7.56141E-05 | 7.10652E-05 | 8.9419E-02  | 7.6916E-02  |
| CCNA_01332 | 4.14427E-05 | 1.43826E-04 | -1.7951E+00 | -9.9779E-01 |
| CCNA_01333 | 2.59641E-05 | 7.71292E-05 | -1.5707E+00 | -8.6983E-01 |
| CCNA_01334 | 4.23426E-05 | 1.34573E-04 | -1.6682E+00 | -9.2540E-01 |
| CCNA_01335 | 2.29100E-04 | 4.38819E-05 | 2.3840E+00  | 1.3855E+00  |
| CCNA_01336 | 2.38288E-04 | 7.66189E-05 | 1.6368E+00  | 9.5936E-01  |
| CCNA_01337 | 1.16599E-04 | 7.58609E-05 | 6.2003E-01  | 3.7951E-01  |
| CCNA_01338 | 2.13570E-04 | 8.58801E-05 | 1.3142E+00  | 7.7539E-01  |
| CCNA_01339 | 9.41836E-05 | 4.50227E-05 | 1.0646E+00  | 6.3306E-01  |
| CCNA_01340 | 1.84521E-05 | 1.31653E-04 | -2.8347E+00 | -1.5907E+00 |
| CCNA_01341 | 2.87815E-04 | 1.47399E-04 | 9.6536E-01  | 5.7644E-01  |
| CCNA_01342 | 1.96641E-04 | 4.66588E-05 | 2.0751E+00  | 1.2093E+00  |
| CCNA_01343 | 6.11889E-05 | 4.07148E-05 | 5.8752E-01  | 3.6097E-01  |
| CCNA_01344 | 1.50524E-04 | 5.03288E-05 | 1.5804E+00  | 9.2716E-01  |
| CCNA_01345 | 2.62651E-05 | 4.77020E-05 | -8.6096E-01 | -4.6507E-01 |
| CCNA_01346 | 1.90029E-05 | 1.46641E-04 | -2.9478E+00 | -1.6552E+00 |
| CCNA_01347 | 1.68811E-05 | 1.14850E-04 | -2.7661E+00 | -1.5515E+00 |
| CCNA_01348 | 3.70456E-05 | 1.18354E-05 | 1.6454E+00  | 9.6425E-01  |
| CCNA_01349 | 3.86615E-04 | 0.00000E+00 | 1.5653E+01  | 8.9523E+00  |
| CCNA_01350 | 0.00000E+00 | 0.00000E+00 | -1.3183E+00 | -7.2586E-01 |
| CCNA_01351 | 2.30358E-05 | 1.08448E-04 | -2.2350E+00 | -1.2486E+00 |
| CCNA_01352 | 2.08652E-04 | 7.45100E-05 | 1.4855E+00  | 8.7305E-01  |
| CCNA_01353 | 1.60775E-05 | 1.38671E-04 | -3.1084E+00 | -1.7467E+00 |
| CCNA_01354 | 2.44353E-04 | 1.28854E-04 | 9.2316E-01  | 5.5238E-01  |
| CCNA_01355 | 2.24146E-04 | 1.13003E-04 | 9.8800E-01  | 5.8935E-01  |
| CCNA_01356 | 1.52838E-04 | 5.53496E-05 | 1.4652E+00  | 8.6149E-01  |
| CCNA_01357 | 3.24379E-05 | 9.49537E-05 | -1.5495E+00 | -8.5774E-01 |
| CCNA_01358 | 2.45105E-05 | 3.24443E-05 | -4.0472E-01 | -2.0488E-01 |
| CCNA_01359 | 1.48345E-05 | 1.23946E-04 | -3.0625E+00 | -1.7205E+00 |
| CCNA_01360 | 2.04415E-05 | 1.27751E-04 | -2.6436E+00 | -1.4817E+00 |
| CCNA_01361 | 1.58527E-04 | 1.47099E-04 | 1.0790E-01  | 8.7453E-02  |
| CCNA_01362 | 4.73025E-05 | 6.72076E-05 | -5.0678E-01 | -2.6308E-01 |
| CCNA_01363 | 2.09381E-05 | 7.46901E-05 | -1.8347E+00 | -1.0204E+00 |
| CCNA_01364 | 2.05287E-05 | 1.43166E-04 | -2.8018E+00 | -1.5719E+00 |
| CCNA_01365 | 2.00246E-04 | 1.06534E-04 | 9.1038E-01  | 5.4509E-01  |
| CCNA_01366 | 1.56802E-05 | 2.72433E-05 | -7.9708E-01 | -4.2863E-01 |
| CCNA_01367 | 2.30930E-05 | 3.29621E-05 | -5.1350E-01 | -2.6691E-01 |
| CCNA_01368 | 1.29764E-04 | 1.20531E-04 | 1.0643E-01  | 8.6615E-02  |
| CCNA_01369 | 1.20951E-04 | 1.43774E-04 | -2.4941E-01 | -1.1631E-01 |
| CCNA_01370 | 2.11259E-04 | 1.46979E-04 | 5.2335E-01  | 3.2438E-01  |
| CCNA_01371 | 6.49059E-05 | 6.51437E-05 | -5.3762E-03 | 2.2856E-02  |
| CCNA_01372 | 2.15984E-04 | 1.08996E-04 | 9.8657E-01  | 5.8854E-01  |
| CCNA_01373 | 2.13305E-04 | 6.12261E-05 | 1.8005E+00  | 1.0527E+00  |
| CCNA_01374 | 1.03501E-04 | 7.80448E-05 | 4.0718E-01  | 2.5813E-01  |
| CCNA_01375 | 5.45136E-05 | 1.35128E-04 | -1.3096E+00 | -7.2094E-01 |
| CCNA_01376 | 2.66564E-05 | 9.97494E-05 | -1.9038E+00 | -1.0598E+00 |
| CCNA_01377 | 5.50932E-04 | 7.72118E-05 | 2.8348E+00  | 1.6426E+00  |

|            |             |             |             |             |
|------------|-------------|-------------|-------------|-------------|
| CCNA_01378 | 5.42219E-04 | 8.38537E-05 | 2.6928E+00  | 1.5616E+00  |
| CCNA_01379 | 7.88946E-05 | 1.09716E-04 | -4.7582E-01 | -2.4543E-01 |
| CCNA_01380 | 2.51856E-04 | 8.35610E-05 | 1.5916E+00  | 9.3357E-01  |
| CCNA_01381 | 6.23025E-05 | 8.11819E-05 | -3.8193E-01 | -1.9188E-01 |
| CCNA_01382 | 1.16747E-04 | 5.21525E-05 | 1.1624E+00  | 6.8882E-01  |
| CCNA_01383 | 1.79627E-04 | 6.27196E-05 | 1.5179E+00  | 8.9153E-01  |
| CCNA_01384 | 7.06091E-05 | 1.47099E-04 | -1.0589E+00 | -5.7793E-01 |
| CCNA_01385 | 1.05714E-04 | 9.64097E-05 | 1.3284E-01  | 1.0168E-01  |
| CCNA_01386 | 2.07183E-04 | 3.68722E-05 | 2.4900E+00  | 1.4459E+00  |
| CCNA_01387 | 1.74610E-04 | 5.26478E-05 | 1.7295E+00  | 1.0122E+00  |
| CCNA_01388 | 2.82755E-04 | 1.22805E-04 | 1.2031E+00  | 7.1203E-01  |
| CCNA_01389 | 1.60453E-04 | 9.98169E-05 | 6.8471E-01  | 4.1640E-01  |
| CCNA_01390 | 5.63675E-05 | 6.38979E-05 | -1.8100E-01 | -7.7296E-02 |
| CCNA_01391 | 1.61506E-04 | 8.14596E-05 | 9.8733E-01  | 5.8897E-01  |
| CCNA_01392 | 3.55619E-05 | 1.47099E-04 | -2.0483E+00 | -1.1422E+00 |
| CCNA_01393 | 3.84391E-05 | 2.03236E-05 | 9.1900E-01  | 5.5001E-01  |
| CCNA_01394 | 2.10952E-04 | 7.18457E-05 | 1.5538E+00  | 9.1202E-01  |
| CCNA_01395 | 1.97568E-04 | 4.91279E-05 | 2.0075E+00  | 1.1708E+00  |
| CCNA_01396 | 1.84039E-05 | 7.42248E-05 | -2.0118E+00 | -1.1214E+00 |
| CCNA_01397 | 3.93507E-04 | 1.45373E-04 | 1.4366E+00  | 8.4517E-01  |
| CCNA_01398 | 1.55779E-05 | 7.16055E-05 | -2.2004E+00 | -1.2289E+00 |
| CCNA_01399 | 1.69653E-05 | 1.41297E-04 | -3.0579E+00 | -1.7179E+00 |
| CCNA_01400 | 2.39838E-05 | 4.09475E-05 | -7.7180E-01 | -4.1422E-01 |
| CCNA_01401 | 1.12943E-04 | 1.45898E-04 | -3.6940E-01 | -1.8474E-01 |
| CCNA_01402 | 1.43620E-04 | 7.76396E-05 | 8.8728E-01  | 5.3192E-01  |
| CCNA_01403 | 1.02701E-04 | 1.47346E-04 | -5.2079E-01 | -2.7107E-01 |
| CCNA_01404 | 6.11679E-05 | 5.70082E-05 | 1.0149E-01  | 8.3797E-02  |
| CCNA_01405 | 2.76556E-05 | 1.22069E-04 | -2.1420E+00 | -1.1956E+00 |
| CCNA_01406 | 1.90570E-05 | 1.00500E-04 | -2.3987E+00 | -1.3420E+00 |
| CCNA_01407 | 2.15370E-05 | 5.11618E-05 | -1.2483E+00 | -6.8593E-01 |
| CCNA_01408 | 4.42387E-05 | 6.22543E-05 | -4.9294E-01 | -2.5519E-01 |
| CCNA_01409 | 3.75723E-05 | 1.46333E-04 | -1.9615E+00 | -1.0927E+00 |
| CCNA_01410 | 4.96741E-05 | 1.32074E-04 | -1.4108E+00 | -7.7861E-01 |
| CCNA_04014 | 3.44077E-04 | 9.99821E-05 | 1.7829E+00  | 1.0427E+00  |
| CCNA_01412 | 2.58582E-04 | 1.46656E-04 | 8.1813E-01  | 4.9248E-01  |
| CCNA_01413 | 9.74009E-05 | 1.21919E-04 | -3.2396E-01 | -1.5883E-01 |
| CCNA_01414 | 1.14056E-04 | 1.17124E-04 | -3.8340E-02 | 4.0579E-03  |
| CCNA_01415 | 9.40572E-05 | 1.18444E-04 | -3.3265E-01 | -1.6378E-01 |
| CCNA_01416 | 1.53672E-05 | 6.96542E-05 | -2.1802E+00 | -1.2174E+00 |
| CCNA_01417 | 1.93998E-04 | 1.47099E-04 | 3.9921E-01  | 2.5358E-01  |
| CCNA_01418 | 2.04785E-04 | 8.19024E-05 | 1.3220E+00  | 7.7984E-01  |
| CCNA_01419 | 2.60424E-04 | 1.08883E-04 | 1.2580E+00  | 7.4333E-01  |
| CCNA_01420 | 2.76826E-05 | 7.47501E-05 | -1.4331E+00 | -7.9133E-01 |
| CCNA_01421 | 8.25333E-05 | 5.29480E-05 | 6.4025E-01  | 3.9104E-01  |
| CCNA_01422 | 2.68014E-04 | 9.60269E-05 | 1.4807E+00  | 8.7033E-01  |
| CCNA_01423 | 2.74753E-04 | 1.46889E-04 | 9.0335E-01  | 5.4109E-01  |
| CCNA_01424 | 1.67465E-04 | 1.37702E-04 | 2.8226E-01  | 1.8689E-01  |
| CCNA_01425 | 3.03967E-04 | 1.12853E-04 | 1.4294E+00  | 8.4107E-01  |
| CCNA_01426 | 3.47252E-04 | 5.81640E-05 | 2.5776E+00  | 1.4959E+00  |
| CCNA_01427 | 2.37855E-04 | 9.52689E-05 | 1.3199E+00  | 7.7864E-01  |
| CCNA_01428 | 7.84101E-05 | 9.67849E-05 | -3.0380E-01 | -1.4733E-01 |
| CCNA_01429 | 1.72570E-04 | 4.99235E-05 | 1.7892E+00  | 1.0463E+00  |
| CCNA_01430 | 9.14087E-05 | 6.46484E-05 | 4.9960E-01  | 3.1083E-01  |

|            |             |             |             |             |
|------------|-------------|-------------|-------------|-------------|
| CCNA_01431 | 1.26928E-04 | 3.97016E-05 | 1.6765E+00  | 9.8200E-01  |
| CCNA_01432 | 2.04866E-05 | 5.88995E-05 | -1.5235E+00 | -8.4292E-01 |
| CCNA_01433 | 1.97697E-04 | 5.88320E-05 | 1.7485E+00  | 1.0230E+00  |
| CCNA_01434 | 8.37432E-05 | 1.35443E-04 | -6.9367E-01 | -3.6966E-01 |
| CCNA_01435 | 2.18418E-04 | 6.81007E-05 | 1.6812E+00  | 9.8468E-01  |
| CCNA_01436 | 1.68666E-04 | 1.31278E-04 | 3.6149E-01  | 2.3207E-01  |
| CCNA_01437 | 1.97914E-04 | 1.37177E-04 | 5.2878E-01  | 3.2747E-01  |
| CCNA_01438 | 1.94025E-04 | 1.20193E-04 | 6.9082E-01  | 4.1988E-01  |
| CCNA_01439 | 2.17807E-05 | 6.72076E-05 | -1.6255E+00 | -9.0108E-01 |
| CCNA_01440 | 2.17567E-05 | 6.06782E-05 | -1.4797E+00 | -8.1792E-01 |
| CCNA_01441 | 1.69142E-05 | 6.63295E-05 | -1.9713E+00 | -1.0983E+00 |
| CCNA_01442 | 2.27402E-04 | 4.33115E-05 | 2.3922E+00  | 1.3901E+00  |
| CCNA_01443 | 3.74790E-05 | 9.45484E-05 | -1.3350E+00 | -7.3538E-01 |
| CCNA_01444 | 3.10032E-04 | 1.46100E-04 | 1.0854E+00  | 6.4490E-01  |
| CCNA_01445 | 3.44874E-04 | 5.73310E-05 | 2.5885E+00  | 1.5021E+00  |
| CCNA_01446 | 2.27167E-04 | 5.20249E-05 | 2.1263E+00  | 1.2385E+00  |
| CCNA_01447 | 3.52973E-04 | 1.36074E-04 | 1.3751E+00  | 8.1011E-01  |
| CCNA_01448 | 1.44129E-04 | 1.47099E-04 | -2.9471E-02 | 9.1156E-03  |
| CCNA_01449 | 1.81060E-05 | 5.65429E-05 | -1.6428E+00 | -9.1095E-01 |
| CCNA_01450 | 1.22011E-04 | 7.00670E-05 | 8.0008E-01  | 4.8219E-01  |
| CCNA_01451 | 2.77600E-04 | 7.43299E-05 | 1.9009E+00  | 1.1099E+00  |
| CCNA_01452 | 5.79506E-05 | 6.74402E-05 | -2.1887E-01 | -9.8895E-02 |
| CCNA_01453 | 3.95466E-05 | 8.71184E-05 | -1.1394E+00 | -6.2387E-01 |
| CCNA_01454 | 4.62040E-05 | 4.84975E-05 | -7.0024E-02 | -1.4011E-02 |
| CCNA_01455 | 5.20186E-05 | 2.80463E-05 | 8.9091E-01  | 5.3399E-01  |
| CCNA_01456 | 1.18402E-04 | 1.35263E-04 | -1.9212E-01 | -8.3638E-02 |
| CCNA_01457 | 5.29456E-05 | 2.27327E-05 | 1.2193E+00  | 7.2129E-01  |
| CCNA_01458 | 1.17620E-04 | 9.77756E-05 | 2.6651E-01  | 1.7791E-01  |
| CCNA_01459 | 1.27019E-04 | 9.57942E-05 | 4.0695E-01  | 2.5800E-01  |
| CCNA_01460 | 6.42708E-05 | 1.03007E-04 | -6.8054E-01 | -3.6217E-01 |
| CCNA_01461 | 1.22745E-04 | 6.81982E-05 | 8.4774E-01  | 5.0937E-01  |
| CCNA_01462 | 7.53613E-05 | 9.71977E-05 | -3.6715E-01 | -1.8346E-01 |
| CCNA_01463 | 1.88930E-04 | 1.41680E-04 | 4.1516E-01  | 2.6268E-01  |
| CCNA_01464 | 3.03961E-04 | 1.42603E-04 | 1.0918E+00  | 6.4856E-01  |
| CCNA_01465 | 2.43239E-04 | 1.47384E-04 | 7.2274E-01  | 4.3808E-01  |
| CCNA_01466 | 2.98192E-04 | 8.31483E-05 | 1.8424E+00  | 1.0766E+00  |
| CCNA_01467 | 2.74970E-04 | 4.40846E-05 | 2.6407E+00  | 1.5319E+00  |
| CCNA_01468 | 4.90180E-05 | 1.21852E-04 | -1.3137E+00 | -7.2328E-01 |
| CCNA_01469 | 1.28888E-04 | 9.11036E-05 | 5.0045E-01  | 3.1132E-01  |
| CCNA_01470 | 5.25964E-05 | 1.47099E-04 | -1.4837E+00 | -8.2022E-01 |
| CCNA_01471 | 1.87681E-05 | 4.92705E-05 | -1.3924E+00 | -7.6815E-01 |
| CCNA_01472 | 4.64447E-05 | 7.03972E-05 | -6.0006E-01 | -3.1628E-01 |
| CCNA_01473 | 1.40099E-05 | 2.02411E-05 | -5.3107E-01 | -2.7693E-01 |
| CCNA_01474 | 1.01506E-04 | 3.00276E-05 | 1.7569E+00  | 1.0278E+00  |
| CCNA_01475 | 2.97864E-05 | 1.36974E-04 | -2.2011E+00 | -1.2293E+00 |
| CCNA_01476 | 4.71279E-05 | 1.10504E-04 | -1.2295E+00 | -6.7521E-01 |
| CCNA_01477 | 1.35936E-04 | 3.93564E-05 | 1.7880E+00  | 1.0456E+00  |
| CCNA_01478 | 1.92806E-04 | 5.74285E-05 | 1.7471E+00  | 1.0223E+00  |
| CCNA_01479 | 2.69862E-04 | 1.21484E-04 | 1.1514E+00  | 6.8253E-01  |
| CCNA_01480 | 1.62361E-04 | 1.07465E-04 | 5.9527E-01  | 3.6539E-01  |
| CCNA_01481 | 1.93384E-04 | 4.19081E-05 | 2.2059E+00  | 1.2839E+00  |
| CCNA_01482 | 3.71236E-04 | 1.18257E-04 | 1.6503E+00  | 9.6707E-01  |
| CCNA_01483 | 4.12080E-05 | 8.96852E-05 | -1.1220E+00 | -6.1391E-01 |

|            |             |             |             |             |
|------------|-------------|-------------|-------------|-------------|
| CCNA_01484 | 3.08223E-04 | 9.86687E-05 | 1.6432E+00  | 9.6301E-01  |
| CCNA_01485 | 2.22262E-05 | 5.44415E-05 | -1.2925E+00 | -7.1113E-01 |
| CCNA_01486 | 4.28100E-04 | 6.55715E-05 | 2.7067E+00  | 1.5695E+00  |
| CCNA_01487 | 4.18505E-04 | 7.62662E-05 | 2.4560E+00  | 1.4265E+00  |
| CCNA_01488 | 1.34681E-04 | 1.28088E-04 | 7.2357E-02  | 6.7186E-02  |
| CCNA_01489 | 1.05003E-04 | 1.33770E-04 | -3.4936E-01 | -1.7331E-01 |
| CCNA_01490 | 4.20206E-05 | 1.21154E-04 | -1.5277E+00 | -8.4527E-01 |
| CCNA_01491 | 8.92929E-05 | 6.32074E-05 | 4.9833E-01  | 3.1011E-01  |
| CCNA_01492 | 1.75787E-04 | 1.45755E-04 | 2.7023E-01  | 1.8003E-01  |
| CCNA_01493 | 2.30779E-05 | 7.81949E-05 | -1.7605E+00 | -9.7806E-01 |
| CCNA_01494 | 1.50843E-05 | 1.39684E-04 | -3.2108E+00 | -1.8051E+00 |
| CCNA_01495 | 3.16349E-04 | 9.67324E-05 | 1.7093E+00  | 1.0007E+00  |
| CCNA_01496 | 2.90027E-04 | 1.46979E-04 | 9.8052E-01  | 5.8509E-01  |
| CCNA_01497 | 6.25222E-05 | 4.83699E-05 | 3.7010E-01  | 2.3698E-01  |
| CCNA_01498 | 1.99750E-05 | 1.16441E-04 | -2.5432E+00 | -1.4244E+00 |
| CCNA_01499 | 2.37400E-05 | 6.77629E-05 | -1.5132E+00 | -8.3699E-01 |
| CCNA_01500 | 2.44172E-05 | 8.49945E-05 | -1.7994E+00 | -1.0002E+00 |
| CCNA_01501 | 9.36419E-05 | 1.01671E-04 | -1.1874E-01 | -4.1791E-02 |
| CCNA_01503 | 1.81421E-05 | 5.49218E-05 | -1.5980E+00 | -8.8538E-01 |
| CCNA_01502 | 1.59180E-05 | 1.45838E-04 | -3.1954E+00 | -1.7964E+00 |
| CCNA_01504 | 1.98916E-04 | 9.92015E-05 | 1.0036E+00  | 5.9827E-01  |
| CCNA_01505 | 3.79064E-05 | 6.78680E-05 | -8.4034E-01 | -4.5330E-01 |
| CCNA_01506 | 2.22232E-05 | 4.48051E-05 | -1.0116E+00 | -5.5099E-01 |
| CCNA_01507 | 1.69479E-04 | 9.48936E-05 | 8.3663E-01  | 5.0304E-01  |
| CCNA_01508 | 1.35175E-04 | 1.47099E-04 | -1.2200E-01 | -4.3651E-02 |
| CCNA_01509 | 1.09054E-04 | 9.77681E-05 | 1.5754E-01  | 1.1576E-01  |
| CCNA_01510 | 1.09009E-04 | 9.50137E-05 | 1.9817E-01  | 1.3893E-01  |
| CCNA_01511 | 6.18541E-05 | 1.06549E-04 | -7.8461E-01 | -4.2152E-01 |
| CCNA_01512 | 2.00622E-05 | 6.62019E-05 | -1.7223E+00 | -9.5629E-01 |
| CCNA_01513 | 4.97915E-05 | 1.43736E-04 | -1.5294E+00 | -8.4628E-01 |
| CCNA_01514 | 1.38221E-04 | 7.40672E-05 | 8.9995E-01  | 5.3914E-01  |
| CCNA_01515 | 6.83639E-05 | 4.41371E-05 | 6.3106E-01  | 3.8580E-01  |
| CCNA_01516 | 3.93029E-05 | 1.46626E-04 | -1.8994E+00 | -1.0573E+00 |
| CCNA_01517 | 2.52307E-04 | 3.62568E-05 | 2.7986E+00  | 1.6219E+00  |
| CCNA_04008 | 5.72554E-05 | 6.24344E-05 | -1.2503E-01 | -4.5378E-02 |
| CCNA_01519 | 3.36387E-05 | 7.60035E-05 | -1.1760E+00 | -6.4470E-01 |
| CCNA_01520 | 1.00796E-04 | 6.25920E-05 | 6.8726E-01  | 4.1785E-01  |
| CCNA_01521 | 4.96831E-05 | 1.21356E-04 | -1.2884E+00 | -7.0884E-01 |
| CCNA_01522 | 1.55264E-04 | 1.25724E-04 | 3.0440E-01  | 1.9952E-01  |
| CCNA_01523 | 1.76136E-04 | 1.47099E-04 | 2.5986E-01  | 1.7411E-01  |
| CCNA_01524 | 5.56100E-04 | 1.27638E-04 | 2.1232E+00  | 1.2367E+00  |
| CCNA_01525 | 5.57463E-04 | 1.27998E-04 | 2.1227E+00  | 1.2364E+00  |
| CCNA_01526 | 1.85863E-04 | 1.04185E-04 | 8.3501E-01  | 5.0211E-01  |
| CCNA_01527 | 1.58114E-04 | 4.23734E-05 | 1.8995E+00  | 1.1092E+00  |
| CCNA_01528 | 1.85950E-04 | 2.05938E-05 | 3.1741E+00  | 1.8361E+00  |
| CCNA_01529 | 1.10117E-04 | 6.52262E-05 | 7.5538E-01  | 4.5670E-01  |
| CCNA_01530 | 3.42319E-04 | 1.37522E-04 | 1.3156E+00  | 7.7619E-01  |
| CCNA_01531 | 1.31581E-04 | 6.05731E-05 | 1.1191E+00  | 6.6410E-01  |
| CCNA_01532 | 5.99378E-04 | 7.71442E-05 | 2.9577E+00  | 1.7126E+00  |
| CCNA_01533 | 6.93722E-05 | 9.16815E-05 | -4.0233E-01 | -2.0352E-01 |
| CCNA_01534 | 1.90462E-04 | 7.01195E-05 | 1.4415E+00  | 8.4797E-01  |
| CCNA_01535 | 1.66231E-04 | 6.04005E-05 | 1.4604E+00  | 8.5876E-01  |
| CCNA_01536 | 1.86357E-05 | 3.09207E-05 | -7.3062E-01 | -3.9074E-01 |

|            |             |             |             |             |
|------------|-------------|-------------|-------------|-------------|
| CCNA_01537 | 1.39948E-04 | 9.75804E-05 | 5.2015E-01  | 3.2255E-01  |
| CCNA_01538 | 6.69795E-05 | 5.79539E-05 | 2.0869E-01  | 1.4494E-01  |
| CCNA_01539 | 2.28823E-05 | 1.10752E-04 | -2.2749E+00 | -1.2714E+00 |
| CCNA_01540 | 2.29515E-05 | 9.89539E-05 | -2.1081E+00 | -1.1763E+00 |
| CCNA_01541 | 2.43058E-05 | 1.41290E-04 | -2.5392E+00 | -1.4221E+00 |
| CCNA_01542 | 4.79869E-04 | 7.72718E-05 | 2.6345E+00  | 1.5283E+00  |
| CCNA_01543 | 1.54425E-05 | 1.05040E-04 | -2.7658E+00 | -1.5513E+00 |
| CCNA_01544 | 3.10595E-05 | 1.11232E-04 | -1.8404E+00 | -1.0236E+00 |
| CCNA_01545 | 1.50061E-05 | 1.24291E-04 | -3.0499E+00 | -1.7134E+00 |
| CCNA_01546 | 1.86146E-05 | 1.69914E-05 | 1.3123E-01  | 1.0076E-01  |
| CCNA_01547 | 1.77936E-04 | 3.79680E-05 | 2.2282E+00  | 1.2966E+00  |
| CCNA_01548 | 1.93580E-05 | 6.72301E-05 | -1.7961E+00 | -9.9836E-01 |
| CCNA_01549 | 6.24831E-05 | 7.91181E-05 | -3.4061E-01 | -1.6832E-01 |
| CCNA_01550 | 1.19016E-04 | 7.20183E-05 | 7.2461E-01  | 4.3915E-01  |
| CCNA_01551 | 1.01970E-04 | 7.38720E-05 | 4.6493E-01  | 2.9106E-01  |
| CCNA_01552 | 8.98016E-05 | 1.30227E-04 | -5.3625E-01 | -2.7989E-01 |
| CCNA_01553 | 3.39156E-05 | 1.40562E-04 | -2.0511E+00 | -1.1438E+00 |
| CCNA_01554 | 2.30478E-05 | 5.24677E-05 | -1.1868E+00 | -6.5089E-01 |
| CCNA_01555 | 2.07027E-04 | 1.33762E-04 | 6.3009E-01  | 3.8525E-01  |
| CCNA_01556 | 2.39642E-04 | 1.46168E-04 | 7.1320E-01  | 4.3264E-01  |
| CCNA_01557 | 5.03994E-05 | 1.45800E-04 | -1.5325E+00 | -8.4803E-01 |
| CCNA_01558 | 4.55148E-05 | 5.87119E-05 | -3.6741E-01 | -1.8360E-01 |
| CCNA_01559 | 4.83950E-05 | 1.12636E-04 | -1.2187E+00 | -6.6910E-01 |
| CCNA_01560 | 1.41944E-04 | 7.21609E-05 | 9.7591E-01  | 5.8246E-01  |
| CCNA_01561 | 4.48535E-04 | 1.06519E-04 | 2.0740E+00  | 1.2087E+00  |
| CCNA_01562 | 1.32788E-04 | 7.43374E-05 | 8.3686E-01  | 5.0316E-01  |
| CCNA_01563 | 3.02228E-05 | 1.31173E-04 | -2.1177E+00 | -1.1818E+00 |
| CCNA_01564 | 1.49940E-05 | 3.10333E-05 | -1.0495E+00 | -5.7258E-01 |
| CCNA_01565 | 5.66083E-05 | 1.12035E-04 | -9.8489E-01 | -5.3574E-01 |
| CCNA_01566 | 1.55716E-04 | 7.22510E-05 | 1.1077E+00  | 6.5762E-01  |
| CCNA_01567 | 1.45140E-04 | 9.14864E-05 | 6.6573E-01  | 4.0557E-01  |
| CCNA_01568 | 1.89168E-04 | 5.08766E-05 | 1.8944E+00  | 1.1063E+00  |
| CCNA_01569 | 2.58227E-05 | 1.44457E-04 | -2.4838E+00 | -1.3906E+00 |
| CCNA_01570 | 1.98636E-05 | 1.30895E-04 | -2.7201E+00 | -1.5253E+00 |
| CCNA_01571 | 2.89798E-05 | 4.82649E-05 | -7.3600E-01 | -3.9380E-01 |
| CCNA_01572 | 9.03373E-05 | 4.47675E-05 | 1.0127E+00  | 6.0343E-01  |
| CCNA_01573 | 1.47821E-04 | 1.18850E-04 | 3.1465E-01  | 2.0536E-01  |
| CCNA_01574 | 1.56426E-04 | 1.42115E-04 | 1.3837E-01  | 1.0483E-01  |
| CCNA_01575 | 1.19642E-04 | 3.13260E-05 | 1.9330E+00  | 1.1283E+00  |
| CCNA_01576 | 2.08809E-05 | 1.02098E-04 | -2.2896E+00 | -1.2798E+00 |
| CCNA_01577 | 2.19327E-04 | 1.18812E-04 | 8.8433E-01  | 5.3024E-01  |
| CCNA_01578 | 1.98061E-04 | 1.08966E-04 | 8.6200E-01  | 5.1750E-01  |
| CCNA_01579 | 1.67667E-05 | 7.83300E-05 | -2.2238E+00 | -1.2423E+00 |
| CCNA_01580 | 2.60033E-05 | 1.28306E-04 | -2.3027E+00 | -1.2873E+00 |
| CCNA_01581 | 6.05058E-05 | 1.28764E-04 | -1.0896E+00 | -5.9545E-01 |
| CCNA_01582 | 2.29665E-05 | 2.34833E-05 | -3.2370E-02 | 7.4625E-03  |
| CCNA_01583 | 3.08849E-05 | 8.45967E-05 | -1.4537E+00 | -8.0308E-01 |
| CCNA_01584 | 4.38564E-05 | 6.89112E-05 | -6.5201E-01 | -3.4590E-01 |
| CCNA_01585 | 2.63554E-05 | 1.34505E-04 | -2.3514E+00 | -1.3150E+00 |
| CCNA_01586 | 2.42968E-05 | 1.20688E-04 | -2.3124E+00 | -1.2928E+00 |
| CCNA_01587 | 2.43600E-05 | 1.12688E-04 | -2.2097E+00 | -1.2342E+00 |
| CCNA_01588 | 3.32535E-05 | 1.45785E-04 | -2.1322E+00 | -1.1900E+00 |
| CCNA_01589 | 4.26481E-04 | 9.44809E-05 | 2.1743E+00  | 1.2659E+00  |

|            |             |             |             |             |
|------------|-------------|-------------|-------------|-------------|
| CCNA_01590 | 4.01432E-04 | 5.33233E-05 | 2.9121E+00  | 1.6866E+00  |
| CCNA_01591 | 1.80518E-05 | 1.39353E-04 | -2.9484E+00 | -1.6555E+00 |
| CCNA_01592 | 1.65620E-05 | 7.48852E-05 | -2.1767E+00 | -1.2154E+00 |
| CCNA_01593 | 1.35942E-04 | 1.47601E-04 | -1.1875E-01 | -4.1800E-02 |
| CCNA_01594 | 1.60928E-04 | 5.71058E-05 | 1.4945E+00  | 8.7823E-01  |
| CCNA_01595 | 5.43240E-05 | 4.09325E-05 | 4.0816E-01  | 2.5869E-01  |
| CCNA_01596 | 2.77191E-04 | 7.57783E-05 | 1.8709E+00  | 1.0929E+00  |
| CCNA_01597 | 4.62548E-04 | 7.49753E-05 | 2.6250E+00  | 1.5229E+00  |
| CCNA_01598 | 4.43970E-04 | 4.11726E-05 | 3.4305E+00  | 1.9822E+00  |
| CCNA_01599 | 1.08181E-04 | 4.21107E-05 | 1.3610E+00  | 8.0206E-01  |
| CCNA_01600 | 1.87010E-04 | 1.37027E-04 | 4.4860E-01  | 2.8175E-01  |
| CCNA_01601 | 1.69087E-04 | 1.02999E-04 | 7.1506E-01  | 4.3370E-01  |
| CCNA_01602 | 1.19335E-04 | 5.98526E-05 | 9.9539E-01  | 5.9357E-01  |
| CCNA_01603 | 1.15110E-04 | 4.41671E-05 | 1.3818E+00  | 8.1391E-01  |
| CCNA_01604 | 9.75695E-05 | 6.07983E-05 | 6.8227E-01  | 4.1500E-01  |
| CCNA_01605 | 3.12431E-05 | 2.02636E-06 | 3.9414E+00  | 2.2736E+00  |
| CCNA_01606 | 2.45869E-04 | 3.51311E-05 | 2.8068E+00  | 1.6266E+00  |
| CCNA_01607 | 2.42631E-04 | 2.84366E-05 | 3.0926E+00  | 1.7896E+00  |
| CCNA_01608 | 4.68390E-05 | 4.88803E-05 | -6.1671E-02 | -9.2473E-03 |
| CCNA_01609 | 1.01599E-04 | 2.49467E-05 | 2.0256E+00  | 1.1811E+00  |
| CCNA_01610 | 1.59944E-04 | 1.47099E-04 | 1.2074E-01  | 9.4777E-02  |
| CCNA_01611 | 1.33432E-04 | 1.10474E-04 | 2.7233E-01  | 1.8123E-01  |
| CCNA_01612 | 2.09134E-04 | 6.63445E-05 | 1.6562E+00  | 9.7044E-01  |
| CCNA_01613 | 1.50828E-04 | 1.12335E-04 | 4.2502E-01  | 2.6830E-01  |
| CCNA_01614 | 5.93200E-05 | 9.07659E-05 | -6.1368E-01 | -3.2404E-01 |
| CCNA_01615 | 1.66322E-04 | 1.46964E-04 | 1.7847E-01  | 1.2770E-01  |
| CCNA_01616 | 1.54665E-05 | 7.82625E-05 | -2.3390E+00 | -1.3080E+00 |
| CCNA_01617 | 2.42487E-05 | 1.47099E-04 | -2.6007E+00 | -1.4572E+00 |
| CCNA_01618 | 5.17477E-05 | 3.37952E-05 | 6.1444E-01  | 3.7632E-01  |
| CCNA_01619 | 1.37453E-04 | 6.52938E-05 | 1.0738E+00  | 6.3828E-01  |
| CCNA_01620 | 1.27813E-04 | 1.38851E-04 | -1.1954E-01 | -4.2248E-02 |
| CCNA_01621 | 1.47743E-04 | 1.39856E-04 | 7.9098E-02  | 7.1030E-02  |
| CCNA_01622 | 1.72889E-04 | 7.21759E-05 | 1.2601E+00  | 7.4455E-01  |
| CCNA_01623 | 1.34028E-04 | 9.10361E-05 | 5.5794E-01  | 3.4410E-01  |
| CCNA_01624 | 1.26664E-04 | 1.25874E-04 | 8.9653E-03  | 3.1035E-02  |
| CCNA_01625 | 1.09199E-04 | 1.43279E-04 | -3.9190E-01 | -1.9757E-01 |
| CCNA_01626 | 1.07727E-04 | 1.38535E-04 | -3.6291E-01 | -1.8104E-01 |
| CCNA_01627 | 1.58728E-05 | 1.43714E-04 | -3.1784E+00 | -1.7866E+00 |
| CCNA_01628 | 1.51565E-05 | 6.23368E-05 | -2.0400E+00 | -1.1375E+00 |
| CCNA_01629 | 4.59632E-05 | 8.09718E-05 | -8.1698E-01 | -4.3998E-01 |
| CCNA_01630 | 1.91741E-04 | 6.56540E-05 | 1.5461E+00  | 9.0761E-01  |
| CCNA_01631 | 3.17980E-04 | 8.19400E-05 | 1.9562E+00  | 1.1415E+00  |
| CCNA_01632 | 3.39638E-05 | 1.22144E-04 | -1.8465E+00 | -1.0271E+00 |
| CCNA_01633 | 3.94172E-05 | 1.45875E-04 | -1.8878E+00 | -1.0506E+00 |
| CCNA_01634 | 6.22845E-05 | 1.03787E-04 | -7.3672E-01 | -3.9421E-01 |
| CCNA_01635 | 2.73787E-05 | 1.26933E-04 | -2.2129E+00 | -1.2360E+00 |
| CCNA_01636 | 1.65500E-05 | 5.11468E-05 | -1.6278E+00 | -9.0235E-01 |
| CCNA_01637 | 4.06984E-04 | 1.36809E-04 | 1.5727E+00  | 9.2282E-01  |
| CCNA_01638 | 7.66615E-05 | 7.91856E-05 | -4.6816E-02 | -7.7578E-04 |
| CCNA_01639 | 3.06201E-05 | 1.33515E-04 | -2.1244E+00 | -1.1856E+00 |
| CCNA_01640 | 1.89336E-05 | 1.00718E-04 | -2.4112E+00 | -1.3491E+00 |
| CCNA_01641 | 8.89137E-05 | 9.69725E-05 | -1.2523E-01 | -4.5495E-02 |
| CCNA_01642 | 2.02187E-05 | 7.14629E-05 | -1.8214E+00 | -1.0128E+00 |

|            |             |             |             |             |
|------------|-------------|-------------|-------------|-------------|
| CCNA_01643 | 2.06220E-05 | 1.20516E-04 | -2.5468E+00 | -1.4265E+00 |
| CCNA_01644 | 3.99620E-05 | 8.08217E-05 | -1.0161E+00 | -5.5356E-01 |
| CCNA_01645 | 6.85325E-05 | 5.93723E-05 | 2.0688E-01  | 1.4390E-01  |
| CCNA_01646 | 1.25020E-05 | 8.79965E-05 | -2.8151E+00 | -1.5794E+00 |
| CCNA_01647 | 1.68522E-04 | 1.39121E-04 | 2.7654E-01  | 1.8363E-01  |
| CCNA_01648 | 1.43864E-04 | 7.33692E-05 | 9.7134E-01  | 5.7986E-01  |
| CCNA_01649 | 2.81642E-05 | 4.87302E-05 | -7.9102E-01 | -4.2518E-01 |
| CCNA_01650 | 2.69769E-04 | 1.46296E-04 | 8.8278E-01  | 5.2935E-01  |
| CCNA_01651 | 2.48283E-04 | 1.27601E-04 | 9.6028E-01  | 5.7355E-01  |
| CCNA_01652 | 1.98389E-04 | 7.17556E-05 | 1.4670E+00  | 8.6254E-01  |
| CCNA_01653 | 2.05889E-05 | 1.24734E-05 | 7.2236E-01  | 4.3787E-01  |
| CCNA_01654 | 1.44670E-04 | 9.28673E-05 | 6.3944E-01  | 3.9058E-01  |
| CCNA_01655 | 6.09030E-05 | 1.07127E-04 | -8.1476E-01 | -4.3872E-01 |
| CCNA_01656 | 1.71730E-05 | 9.17415E-05 | -2.4173E+00 | -1.3526E+00 |
| CCNA_01657 | 1.61049E-04 | 1.41838E-04 | 1.8321E-01  | 1.3040E-01  |
| CCNA_01658 | 1.29785E-04 | 8.92874E-05 | 5.3950E-01  | 3.3359E-01  |
| CCNA_01659 | 4.86538E-05 | 5.49744E-05 | -1.7631E-01 | -7.4626E-02 |
| CCNA_01660 | 2.64192E-04 | 2.43613E-05 | 3.4385E+00  | 1.9868E+00  |
| CCNA_01661 | 6.87100E-05 | 1.21236E-04 | -8.1926E-01 | -4.4128E-01 |
| CCNA_01662 | 1.87103E-04 | 8.32158E-05 | 1.1688E+00  | 6.9246E-01  |
| CCNA_01663 | 5.50764E-05 | 5.60176E-05 | -2.4560E-02 | 1.1916E-02  |
| CCNA_01664 | 1.07540E-04 | 1.36839E-04 | -3.4764E-01 | -1.7233E-01 |
| CCNA_01665 | 2.69664E-04 | 1.47099E-04 | 8.7432E-01  | 5.2453E-01  |
| CCNA_01666 | 1.47135E-04 | 1.15578E-04 | 3.4822E-01  | 2.2450E-01  |
| CCNA_01667 | 3.04151E-04 | 4.82724E-05 | 2.6553E+00  | 1.5402E+00  |
| CCNA_01668 | 1.81596E-04 | 1.28208E-04 | 5.0218E-01  | 3.1230E-01  |
| CCNA_01669 | 2.51214E-05 | 4.82123E-05 | -9.4053E-01 | -5.1044E-01 |
| CCNA_01670 | 1.26411E-04 | 1.45297E-04 | -2.0093E-01 | -8.8663E-02 |
| CCNA_01671 | 1.39668E-04 | 1.38018E-04 | 1.7105E-02  | 3.5677E-02  |
| CCNA_01672 | 2.22581E-04 | 8.57525E-05 | 1.3760E+00  | 8.1061E-01  |
| CCNA_01673 | 4.17046E-05 | 7.14404E-05 | -7.7658E-01 | -4.1695E-01 |
| CCNA_01674 | 3.03769E-04 | 6.50987E-05 | 2.2221E+00  | 1.2931E+00  |
| CCNA_01675 | 2.95342E-04 | 7.71217E-05 | 1.9371E+00  | 1.1306E+00  |
| CCNA_01676 | 7.73296E-05 | 7.54781E-05 | 3.4876E-02  | 4.5811E-02  |
| CCNA_01677 | 3.08157E-04 | 7.17781E-05 | 2.1019E+00  | 1.2246E+00  |
| CCNA_01678 | 1.34621E-05 | 4.98559E-05 | -1.8888E+00 | -1.0512E+00 |
| CCNA_01679 | 1.57308E-04 | 1.25282E-04 | 3.2836E-01  | 2.1318E-01  |
| CCNA_01680 | 1.69397E-04 | 3.79980E-05 | 2.1562E+00  | 1.2555E+00  |
| CCNA_01681 | 3.60193E-05 | 4.82874E-05 | -4.2298E-01 | -2.1529E-01 |
| CCNA_01682 | 1.97709E-04 | 1.47076E-04 | 4.2676E-01  | 2.6930E-01  |
| CCNA_01683 | 2.14193E-04 | 1.20583E-04 | 8.2881E-01  | 4.9857E-01  |
| CCNA_01684 | 2.59331E-04 | 7.43974E-05 | 1.8013E+00  | 1.0532E+00  |
| CCNA_01685 | 4.77533E-04 | 5.47417E-05 | 3.1247E+00  | 1.8079E+00  |
| CCNA_01686 | 4.67264E-04 | 1.02068E-04 | 2.1946E+00  | 1.2775E+00  |
| CCNA_01687 | 1.46148E-04 | 8.13095E-05 | 8.4583E-01  | 5.0828E-01  |
| CCNA_01688 | 1.39352E-04 | 1.11833E-04 | 3.1733E-01  | 2.0689E-01  |
| CCNA_01689 | 3.70378E-04 | 1.37545E-04 | 1.4290E+00  | 8.4087E-01  |
| CCNA_01690 | 2.48115E-05 | 5.88395E-05 | -1.2458E+00 | -6.8452E-01 |
| CCNA_01691 | 2.15701E-05 | 1.38250E-04 | -2.6801E+00 | -1.5025E+00 |
| CCNA_01692 | 1.66608E-04 | 7.38871E-05 | 1.1729E+00  | 6.9482E-01  |
| CCNA_01693 | 2.16092E-05 | 7.30390E-05 | -1.7570E+00 | -9.7604E-01 |
| CCNA_01694 | 1.81331E-05 | 6.15413E-05 | -1.7629E+00 | -9.7940E-01 |
| CCNA_01695 | 3.80870E-05 | 9.12762E-05 | -1.2609E+00 | -6.9317E-01 |



|            |             |             |             |             |
|------------|-------------|-------------|-------------|-------------|
| CCNA_01696 | 1.65199E-05 | 7.11477E-06 | 1.2141E+00  | 7.1827E-01  |
| CCNA_01697 | 2.48536E-05 | 4.72667E-05 | -9.2742E-01 | -5.0297E-01 |
| CCNA_01698 | 1.99629E-05 | 9.61620E-05 | -2.2680E+00 | -1.2675E+00 |
| CCNA_01699 | 6.95016E-05 | 1.15855E-04 | -7.3724E-01 | -3.9451E-01 |
| CCNA_01700 | 6.65100E-05 | 1.07855E-04 | -6.9748E-01 | -3.7184E-01 |
| CCNA_01701 | 9.78794E-05 | 9.06083E-05 | 1.1129E-01  | 8.9388E-02  |
| CCNA_01702 | 1.02180E-04 | 1.06249E-04 | -5.6389E-02 | -6.2352E-03 |
| CCNA_01703 | 6.18481E-05 | 1.05003E-04 | -7.6366E-01 | -4.0958E-01 |
| CCNA_01704 | 4.72032E-05 | 1.74192E-05 | 1.4377E+00  | 8.4580E-01  |
| CCNA_01705 | 2.53261E-05 | 1.42220E-04 | -2.4893E+00 | -1.3937E+00 |
| CCNA_01706 | 2.05829E-05 | 1.47099E-04 | -2.8371E+00 | -1.5920E+00 |
| CCNA_01707 | 3.84451E-05 | 8.82967E-05 | -1.1996E+00 | -6.5816E-01 |
| CCNA_01708 | 7.59091E-05 | 9.97119E-05 | -3.9354E-01 | -1.9851E-01 |
| CCNA_01709 | 2.87553E-04 | 7.77597E-05 | 1.8866E+00  | 1.1018E+00  |
| CCNA_01710 | 4.06692E-05 | 1.25094E-04 | -1.6210E+00 | -8.9849E-01 |
| CCNA_01711 | 1.60856E-04 | 4.06848E-05 | 1.9830E+00  | 1.1568E+00  |
| CCNA_01712 | 3.02749E-04 | 1.28861E-04 | 1.2322E+00  | 7.2864E-01  |
| CCNA_01713 | 3.11245E-04 | 1.47099E-04 | 1.0812E+00  | 6.4251E-01  |
| CCNA_01714 | 5.02844E-04 | 1.47009E-04 | 1.7741E+00  | 1.0377E+00  |
| CCNA_01715 | 7.72845E-05 | 1.47099E-04 | -9.2855E-01 | -5.0361E-01 |
| CCNA_01716 | 2.63855E-05 | 1.45905E-04 | -2.4671E+00 | -1.3810E+00 |
| CCNA_01717 | 5.45828E-05 | 7.45400E-05 | -4.4963E-01 | -2.3049E-01 |
| CCNA_01718 | 8.86609E-05 | 1.39646E-04 | -6.5543E-01 | -3.4786E-01 |
| CCNA_01719 | 1.10336E-04 | 5.68206E-05 | 9.5727E-01  | 5.7183E-01  |
| CCNA_04016 | 1.08371E-04 | 7.02621E-05 | 6.2505E-01  | 3.8237E-01  |
| CCNA_01721 | 9.12944E-05 | 9.40005E-05 | -4.2211E-02 | 1.8504E-03  |
| CCNA_01722 | 1.55839E-05 | 6.99769E-05 | -2.1667E+00 | -1.2097E+00 |
| CCNA_01723 | 8.52901E-05 | 4.37844E-05 | 9.6177E-01  | 5.7440E-01  |
| CCNA_01724 | 9.32807E-05 | 1.47917E-04 | -6.6516E-01 | -3.5340E-01 |
| CCNA_01725 | 2.07313E-04 | 1.23503E-04 | 7.4720E-01  | 4.5203E-01  |
| CCNA_01726 | 7.86870E-05 | 3.73375E-05 | 1.0753E+00  | 6.3912E-01  |
| CCNA_01727 | 3.90479E-04 | 1.43128E-04 | 1.4479E+00  | 8.5161E-01  |
| CCNA_01728 | 1.44896E-04 | 4.56831E-05 | 1.6651E+00  | 9.7548E-01  |
| CCNA_01729 | 1.35235E-04 | 1.47099E-04 | -1.2136E-01 | -4.3284E-02 |
| CCNA_01730 | 3.34320E-04 | 5.14920E-05 | 2.6986E+00  | 1.5649E+00  |
| CCNA_01731 | 9.21250E-05 | 5.38636E-05 | 7.7413E-01  | 4.6739E-01  |
| CCNA_01732 | 1.57729E-04 | 7.23860E-05 | 1.1235E+00  | 6.6665E-01  |
| CCNA_01733 | 1.47234E-04 | 7.38120E-05 | 9.9607E-01  | 5.9396E-01  |
| CCNA_01734 | 1.91097E-04 | 1.35601E-04 | 4.9488E-01  | 3.0814E-01  |
| CCNA_01735 | 2.31679E-04 | 6.16238E-05 | 1.9104E+00  | 1.1154E+00  |
| CCNA_01736 | 1.88533E-04 | 3.12585E-05 | 2.5922E+00  | 1.5042E+00  |
| CCNA_01737 | 1.64808E-05 | 1.13874E-04 | -2.7884E+00 | -1.5642E+00 |
| CCNA_01738 | 2.24218E-05 | 1.22077E-04 | -2.4447E+00 | -1.3682E+00 |
| CCNA_01739 | 7.62913E-05 | 1.21296E-04 | -6.6898E-01 | -3.5558E-01 |
| CCNA_01740 | 1.69593E-05 | 2.05713E-05 | -2.7883E-01 | -1.3309E-01 |
| CCNA_01741 | 2.39537E-05 | 1.29147E-04 | -2.4306E+00 | -1.3602E+00 |
| CCNA_01742 | 2.50071E-05 | 9.34977E-05 | -1.9025E+00 | -1.0591E+00 |
| CCNA_01743 | 3.59411E-05 | 1.47346E-04 | -2.0355E+00 | -1.1349E+00 |
| CCNA_01744 | 2.23631E-04 | 8.82892E-05 | 1.3407E+00  | 7.9050E-01  |
| CCNA_01745 | 2.85383E-04 | 4.38894E-05 | 2.7007E+00  | 1.5661E+00  |
| CCNA_01746 | 2.85169E-04 | 2.19372E-05 | 3.6999E+00  | 2.1359E+00  |
| CCNA_01747 | 1.01217E-04 | 1.24336E-04 | -2.9683E-01 | -1.4336E-01 |
| CCNA_01748 | 7.04857E-05 | 1.47076E-04 | -1.0612E+00 | -5.7924E-01 |

|            |             |             |             |             |
|------------|-------------|-------------|-------------|-------------|
| CCNA_01749 | 1.43894E-04 | 7.53956E-05 | 9.3234E-01  | 5.5761E-01  |
| CCNA_01750 | 2.28841E-04 | 7.20558E-05 | 1.6670E+00  | 9.7659E-01  |
| CCNA_01751 | 1.35927E-04 | 1.07997E-04 | 3.3177E-01  | 2.1512E-01  |
| CCNA_01752 | 3.52549E-05 | 1.07149E-04 | -1.6037E+00 | -8.8863E-01 |
| CCNA_01753 | 1.73918E-04 | 1.14024E-04 | 6.0900E-01  | 3.7322E-01  |
| CCNA_01754 | 1.59830E-04 | 1.15052E-04 | 4.7418E-01  | 2.9634E-01  |
| CCNA_01755 | 1.73205E-05 | 8.96026E-05 | -2.3709E+00 | -1.3262E+00 |
| CCNA_01756 | 1.25382E-05 | 1.41155E-04 | -3.4926E+00 | -1.9658E+00 |
| CCNA_01757 | 3.28502E-05 | 6.18565E-05 | -9.1307E-01 | -4.9478E-01 |
| CCNA_01758 | 5.15310E-05 | 4.83474E-05 | 9.1862E-02  | 7.8309E-02  |
| CCNA_01759 | 4.75222E-05 | 4.82724E-05 | -2.2730E-02 | 1.2960E-02  |
| CCNA_01760 | 2.24456E-04 | 2.12092E-05 | 3.4032E+00  | 1.9667E+00  |
| CCNA_01761 | 3.49660E-05 | 1.26212E-04 | -1.8518E+00 | -1.0301E+00 |
| CCNA_01762 | 2.22626E-04 | 8.75012E-05 | 1.3471E+00  | 7.9417E-01  |
| CCNA_01763 | 2.08291E-04 | 9.27097E-05 | 1.1677E+00  | 6.9184E-01  |
| CCNA_01764 | 1.37781E-05 | 1.38025E-04 | -3.3242E+00 | -1.8698E+00 |
| CCNA_01765 | 1.68600E-05 | 6.49711E-05 | -1.9461E+00 | -1.0839E+00 |
| CCNA_01766 | 1.47054E-04 | 1.41095E-04 | 5.9635E-02  | 5.9931E-02  |
| CCNA_01767 | 6.10475E-05 | 5.26853E-05 | 2.1240E-01  | 1.4705E-01  |
| CCNA_01768 | 6.77048E-05 | 7.38720E-05 | -1.2585E-01 | -4.5848E-02 |
| CCNA_01769 | 4.67337E-05 | 5.65204E-05 | -2.7441E-01 | -1.3057E-01 |
| CCNA_01770 | 9.01507E-05 | 3.22191E-05 | 1.4841E+00  | 8.7229E-01  |
| CCNA_01771 | 1.41456E-04 | 9.23644E-05 | 6.1486E-01  | 3.7656E-01  |
| CCNA_01772 | 1.64293E-04 | 4.56006E-05 | 1.8489E+00  | 1.0803E+00  |
| CCNA_01773 | 1.73767E-04 | 1.08928E-04 | 6.7371E-01  | 4.1012E-01  |
| CCNA_01774 | 7.33238E-05 | 1.28591E-04 | -8.1046E-01 | -4.3627E-01 |
| CCNA_01775 | 2.11427E-04 | 1.21672E-04 | 7.9710E-01  | 4.8049E-01  |
| CCNA_01776 | 1.96743E-04 | 8.19400E-05 | 1.2636E+00  | 7.4650E-01  |
| CCNA_01777 | 2.43841E-05 | 1.38543E-04 | -2.5062E+00 | -1.4033E+00 |
| CCNA_01778 | 1.20217E-04 | 4.72592E-05 | 1.3468E+00  | 7.9396E-01  |
| CCNA_01779 | 2.01673E-04 | 1.80946E-05 | 3.4778E+00  | 2.0092E+00  |
| CCNA_01780 | 1.72603E-05 | 2.62526E-05 | -6.0517E-01 | -3.1919E-01 |
| CCNA_01781 | 1.41002E-05 | 1.34303E-04 | -3.2515E+00 | -1.8283E+00 |
| CCNA_01782 | 2.32871E-04 | 4.09024E-05 | 2.5090E+00  | 1.4568E+00  |
| CCNA_01783 | 2.03993E-05 | 3.46132E-05 | -7.6290E-01 | -4.0914E-01 |
| CCNA_01784 | 2.66600E-04 | 1.45673E-04 | 8.7189E-01  | 5.2314E-01  |
| CCNA_01785 | 2.67764E-04 | 4.06998E-05 | 2.7176E+00  | 1.5757E+00  |
| CCNA_01786 | 1.45597E-04 | 1.62934E-05 | 3.1590E+00  | 1.8274E+00  |
| CCNA_01787 | 1.19573E-05 | 7.83000E-05 | -2.7109E+00 | -1.5200E+00 |
| CCNA_01788 | 1.64657E-05 | 2.78437E-05 | -7.5801E-01 | -4.0635E-01 |
| CCNA_01789 | 6.13003E-05 | 3.49660E-05 | 8.0970E-01  | 4.8768E-01  |
| CCNA_01790 | 8.77671E-05 | 5.94774E-05 | 5.6121E-01  | 3.4597E-01  |
| CCNA_01791 | 1.74700E-04 | 1.11750E-04 | 6.4454E-01  | 3.9349E-01  |
| CCNA_01792 | 2.72180E-04 | 1.26115E-04 | 1.1098E+00  | 6.5879E-01  |
| CCNA_01793 | 2.33316E-04 | 2.48717E-05 | 3.2293E+00  | 1.8675E+00  |
| CCNA_01794 | 4.82535E-05 | 1.25206E-04 | -1.3756E+00 | -7.5855E-01 |
| CCNA_01795 | 5.31382E-05 | 1.02932E-04 | -9.5389E-01 | -5.1806E-01 |
| CCNA_01796 | 1.36773E-04 | 8.74411E-05 | 6.4531E-01  | 3.9393E-01  |
| CCNA_01797 | 1.96689E-04 | 4.40846E-05 | 2.1573E+00  | 1.2562E+00  |
| CCNA_01798 | 3.90440E-05 | 5.69632E-05 | -5.4501E-01 | -2.8488E-01 |
| CCNA_01799 | 3.76205E-05 | 1.41275E-04 | -1.9089E+00 | -1.0627E+00 |
| CCNA_01800 | 1.93098E-05 | 1.23143E-04 | -2.6728E+00 | -1.4983E+00 |
| CCNA_01801 | 4.98727E-05 | 1.37410E-04 | -1.4622E+00 | -8.0791E-01 |

|            |             |             |             |             |
|------------|-------------|-------------|-------------|-------------|
| CCNA_01802 | 2.14440E-04 | 1.21567E-04 | 8.1876E-01  | 4.9284E-01  |
| CCNA_01803 | 1.45149E-04 | 1.41763E-04 | 3.4010E-02  | 4.5317E-02  |
| CCNA_01804 | 1.92587E-05 | 1.47099E-04 | -2.9331E+00 | -1.6467E+00 |
| CCNA_01805 | 1.27837E-04 | 1.47099E-04 | -2.0251E-01 | -8.9567E-02 |
| CCNA_01806 | 1.56122E-04 | 7.99211E-05 | 9.6592E-01  | 5.7676E-01  |
| CCNA_01807 | 4.09600E-04 | 5.93048E-05 | 2.7878E+00  | 1.6158E+00  |
| CCNA_01808 | 1.06060E-04 | 4.82724E-05 | 1.1354E+00  | 6.7343E-01  |
| CCNA_01809 | 1.39415E-04 | 9.27922E-05 | 5.8723E-01  | 3.6081E-01  |
| CCNA_01810 | 9.84483E-05 | 8.54223E-05 | 2.0467E-01  | 1.4264E-01  |
| CCNA_01811 | 1.24307E-04 | 3.25343E-05 | 1.9336E+00  | 1.1286E+00  |
| CCNA_01812 | 8.45588E-05 | 1.09371E-04 | -3.7125E-01 | -1.8579E-01 |
| CCNA_01813 | 1.29556E-04 | 7.28364E-05 | 8.3073E-01  | 4.9967E-01  |
| CCNA_01814 | 1.53191E-05 | 1.12403E-04 | -2.8751E+00 | -1.6137E+00 |
| CCNA_01815 | 1.22781E-04 | 1.29890E-04 | -8.1245E-02 | -2.0410E-02 |
| CCNA_01816 | 2.11538E-04 | 8.74712E-05 | 1.2739E+00  | 7.5242E-01  |
| CCNA_01817 | 6.53513E-05 | 5.66555E-05 | 2.0587E-01  | 1.4333E-01  |
| CCNA_01818 | 1.72422E-05 | 5.40362E-05 | -1.6479E+00 | -9.1386E-01 |
| CCNA_01819 | 1.84190E-05 | 1.19773E-04 | -2.7009E+00 | -1.5143E+00 |
| CCNA_01820 | 3.61578E-05 | 4.75819E-05 | -3.9621E-01 | -2.0003E-01 |
| CCNA_01821 | 1.45961E-04 | 6.16388E-05 | 1.2435E+00  | 7.3508E-01  |
| CCNA_01822 | 1.45095E-05 | 9.27622E-06 | 6.4452E-01  | 3.9348E-01  |
| CCNA_01823 | 1.30140E-04 | 5.95975E-05 | 1.1266E+00  | 6.6839E-01  |
| CCNA_01824 | 8.87602E-05 | 4.65988E-05 | 9.2944E-01  | 5.5596E-01  |
| CCNA_01825 | 3.68319E-05 | 8.87095E-06 | 2.0527E+00  | 1.1965E+00  |
| CCNA_01826 | 1.93851E-05 | 8.89872E-05 | -2.1985E+00 | -1.2279E+00 |
| CCNA_01827 | 4.31672E-05 | 1.32246E-04 | -1.6152E+00 | -8.9519E-01 |
| CCNA_01828 | 1.24024E-04 | 1.08230E-04 | 1.9645E-01  | 1.3796E-01  |
| CCNA_01829 | 1.17511E-04 | 1.25372E-04 | -9.3460E-02 | -2.7376E-02 |
| CCNA_01830 | 1.50298E-04 | 1.46611E-04 | 3.5792E-02  | 4.6334E-02  |
| CCNA_01831 | 2.37981E-04 | 8.41389E-05 | 1.4999E+00  | 8.8128E-01  |
| CCNA_01832 | 3.35304E-05 | 4.05722E-05 | -2.7516E-01 | -1.3100E-01 |
| CCNA_01833 | 2.75773E-05 | 4.34316E-05 | -6.5536E-01 | -3.4781E-01 |
| CCNA_01834 | 1.45456E-05 | 8.63079E-05 | -2.5687E+00 | -1.4390E+00 |
| CCNA_01835 | 6.51737E-05 | 1.07052E-04 | -7.1598E-01 | -3.8239E-01 |
| CCNA_01836 | 4.39678E-05 | 1.42543E-04 | -1.6969E+00 | -9.4176E-01 |
| CCNA_01837 | 2.40461E-04 | 1.00342E-04 | 1.2608E+00  | 7.4492E-01  |
| CCNA_01838 | 1.60354E-05 | 1.42280E-04 | -3.1492E+00 | -1.7700E+00 |
| CCNA_01839 | 3.10354E-05 | 6.72676E-05 | -1.1160E+00 | -6.1052E-01 |
| CCNA_01840 | 2.91002E-05 | 7.90730E-05 | -1.4421E+00 | -7.9650E-01 |
| CCNA_01841 | 2.92146E-05 | 9.47811E-05 | -1.6979E+00 | -9.4234E-01 |
| CCNA_01842 | 7.41274E-05 | 1.32802E-04 | -8.4122E-01 | -4.5380E-01 |
| CCNA_01843 | 1.73439E-04 | 5.25878E-05 | 1.7215E+00  | 1.0076E+00  |
| CCNA_01844 | 1.15967E-04 | 3.97617E-05 | 1.5440E+00  | 9.0645E-01  |
| CCNA_01845 | 1.09846E-04 | 6.77029E-05 | 6.9807E-01  | 4.2402E-01  |
| CCNA_01846 | 1.98155E-05 | 2.77911E-05 | -4.8817E-01 | -2.5247E-01 |
| CCNA_01847 | 2.28916E-04 | 7.62737E-05 | 1.5854E+00  | 9.3006E-01  |
| CCNA_01848 | 1.28644E-04 | 8.03639E-05 | 6.7866E-01  | 4.1295E-01  |
| CCNA_01849 | 9.01086E-05 | 8.53097E-05 | 7.8875E-02  | 7.0903E-02  |
| CCNA_01850 | 1.48059E-04 | 8.90247E-05 | 7.3380E-01  | 4.4439E-01  |
| CCNA_01851 | 2.54405E-05 | 3.94239E-05 | -6.3205E-01 | -3.3452E-01 |
| CCNA_01852 | 2.57625E-05 | 4.14803E-05 | -6.8725E-01 | -3.6600E-01 |
| CCNA_01853 | 3.49013E-04 | 8.02213E-05 | 2.1211E+00  | 1.2355E+00  |
| CCNA_01854 | 1.82571E-04 | 9.36628E-06 | 4.2837E+00  | 2.4688E+00  |

|            |             |             |             |             |
|------------|-------------|-------------|-------------|-------------|
| CCNA_01855 | 1.95304E-04 | 7.78197E-05 | 1.3274E+00  | 7.8291E-01  |
| CCNA_01856 | 1.32201E-04 | 6.73652E-05 | 9.7253E-01  | 5.8054E-01  |
| CCNA_01857 | 1.67065E-05 | 6.92790E-05 | -2.0519E+00 | -1.1442E+00 |
| CCNA_01858 | 1.25887E-04 | 1.47099E-04 | -2.2469E-01 | -1.0221E-01 |
| CCNA_01859 | 2.80769E-04 | 5.63028E-05 | 2.3179E+00  | 1.3478E+00  |
| CCNA_01860 | 1.35882E-04 | 7.94933E-05 | 7.7335E-01  | 4.6694E-01  |
| CCNA_01861 | 1.98817E-05 | 5.79914E-05 | -1.5444E+00 | -8.5480E-01 |
| CCNA_01862 | 3.36658E-05 | 1.11352E-04 | -1.7257E+00 | -9.5823E-01 |
| CCNA_01863 | 2.98932E-04 | 1.91679E-05 | 3.9625E+00  | 2.2857E+00  |
| CCNA_01864 | 2.60048E-04 | 5.01486E-05 | 2.3743E+00  | 1.3799E+00  |
| CCNA_01865 | 3.18940E-04 | 1.00372E-04 | 1.6678E+00  | 9.7705E-01  |
| CCNA_01866 | 1.21138E-05 | 2.73183E-05 | -1.1733E+00 | -6.4316E-01 |
| CCNA_01867 | 2.08568E-05 | 7.32641E-05 | -1.8125E+00 | -1.0077E+00 |
| CCNA_01868 | 5.00804E-05 | 3.09508E-05 | 6.9401E-01  | 4.2170E-01  |
| CCNA_01869 | 1.21009E-04 | 7.79848E-05 | 6.3374E-01  | 3.8733E-01  |
| CCNA_01870 | 1.64116E-05 | 4.44898E-05 | -1.4387E+00 | -7.9456E-01 |
| CCNA_01871 | 1.01783E-04 | 1.29559E-04 | -3.4816E-01 | -1.7262E-01 |
| CCNA_01872 | 1.65891E-05 | 4.69815E-05 | -1.5018E+00 | -8.3053E-01 |
| CCNA_01873 | 2.23436E-05 | 9.00004E-05 | -2.0100E+00 | -1.1203E+00 |
| CCNA_01874 | 1.69593E-04 | 9.98169E-07 | 7.3978E+00  | 4.2447E+00  |
| CCNA_01875 | 1.81896E-04 | 1.39549E-04 | 3.8230E-01  | 2.4394E-01  |
| CCNA_01876 | 1.84545E-04 | 6.44532E-05 | 1.5175E+00  | 8.9132E-01  |
| CCNA_01877 | 1.83916E-04 | 6.40555E-05 | 1.5215E+00  | 8.9360E-01  |
| CCNA_01878 | 2.42459E-04 | 5.01336E-05 | 2.2737E+00  | 1.3226E+00  |
| CCNA_01879 | 2.53234E-04 | 5.97776E-05 | 2.0826E+00  | 1.2136E+00  |
| CCNA_01880 | 2.31923E-05 | 8.45817E-05 | -1.8666E+00 | -1.0386E+00 |
| CCNA_01881 | 1.32385E-04 | 4.92180E-05 | 1.4273E+00  | 8.3988E-01  |
| CCNA_01882 | 1.06529E-04 | 7.86903E-05 | 4.3689E-01  | 2.7507E-01  |
| CCNA_01883 | 2.30854E-04 | 2.42788E-05 | 3.2488E+00  | 1.8786E+00  |
| CCNA_01884 | 1.10776E-04 | 6.23218E-05 | 8.2970E-01  | 4.9908E-01  |
| CCNA_01885 | 7.88977E-05 | 2.30555E-05 | 1.7745E+00  | 1.0379E+00  |
| CCNA_01886 | 2.52810E-05 | 1.29117E-04 | -2.3525E+00 | -1.3156E+00 |
| CCNA_01887 | 8.86188E-05 | 9.58093E-05 | -1.1262E-01 | -3.8300E-02 |
| CCNA_01888 | 2.60514E-05 | 1.41402E-04 | -2.4403E+00 | -1.3657E+00 |
| CCNA_01889 | 8.79657E-05 | 9.93366E-05 | -1.7544E-01 | -7.4130E-02 |
| CCNA_01890 | 7.13796E-05 | 8.10168E-05 | -1.8278E-01 | -7.8315E-02 |
| CCNA_01891 | 1.43969E-04 | 1.35616E-04 | 8.6182E-02  | 7.5070E-02  |
| CCNA_01892 | 1.58572E-04 | 1.03690E-04 | 6.1279E-01  | 3.7538E-01  |
| CCNA_01893 | 3.64708E-05 | 1.32719E-04 | -1.8635E+00 | -1.0368E+00 |
| CCNA_01894 | 1.77478E-05 | 4.40020E-05 | -1.3099E+00 | -7.2110E-01 |
| CCNA_01895 | 1.82986E-05 | 2.46540E-05 | -4.3029E-01 | -2.1946E-01 |
| CCNA_01896 | 6.47388E-04 | 9.37003E-05 | 2.7884E+00  | 1.6161E+00  |
| CCNA_01897 | 2.78632E-05 | 6.24794E-05 | -1.1650E+00 | -6.3847E-01 |
| CCNA_01898 | 1.09867E-04 | 3.06355E-05 | 1.8422E+00  | 1.0765E+00  |
| CCNA_01899 | 1.30694E-04 | 1.35931E-04 | -5.6735E-02 | -6.4323E-03 |
| CCNA_01900 | 2.59190E-05 | 4.22984E-05 | -7.0668E-01 | -3.7708E-01 |
| CCNA_01901 | 2.51227E-04 | 1.23113E-04 | 1.0289E+00  | 6.1270E-01  |
| CCNA_01902 | 1.75754E-04 | 6.77029E-05 | 1.3761E+00  | 8.1070E-01  |
| CCNA_01903 | 3.28815E-04 | 4.57957E-05 | 2.8438E+00  | 1.6477E+00  |
| CCNA_01904 | 9.29045E-05 | 1.74567E-05 | 2.4114E+00  | 1.4011E+00  |
| CCNA_01905 | 7.46059E-05 | 6.36952E-05 | 2.2799E-01  | 1.5594E-01  |
| CCNA_01906 | 2.03090E-04 | 1.13701E-05 | 4.1579E+00  | 2.3971E+00  |
| CCNA_01907 | 1.96343E-04 | 1.31984E-04 | 5.7296E-01  | 3.5267E-01  |

|            |             |             |             |             |
|------------|-------------|-------------|-------------|-------------|
| CCNA_01908 | 8.10104E-05 | 3.68197E-05 | 1.1374E+00  | 6.7455E-01  |
| CCNA_01909 | 5.38364E-05 | 9.52239E-05 | -8.2277E-01 | -4.4329E-01 |
| CCNA_01910 | 1.14017E-04 | 5.93723E-05 | 9.4124E-01  | 5.6269E-01  |
| CCNA_01911 | 7.45153E-04 | 4.65687E-05 | 3.9999E+00  | 2.3070E+00  |
| CCNA_01912 | 3.13869E-04 | 1.15307E-04 | 1.4446E+00  | 8.4974E-01  |
| CCNA_01913 | 3.82684E-04 | 1.44637E-04 | 1.4037E+00  | 8.2640E-01  |
| CCNA_01914 | 2.36248E-04 | 7.27088E-05 | 1.7000E+00  | 9.9538E-01  |
| CCNA_01915 | 2.64999E-05 | 1.37245E-04 | -2.3726E+00 | -1.3271E+00 |
| CCNA_04000 | 9.90923E-05 | 1.45575E-04 | -5.5495E-01 | -2.9055E-01 |
| CCNA_01916 | 1.33477E-04 | 1.23931E-04 | 1.0701E-01  | 8.6947E-02  |
| CCNA_01917 | 5.96263E-04 | 1.47099E-04 | 2.0191E+00  | 1.1774E+00  |
| CCNA_01918 | 5.84026E-04 | 1.47099E-04 | 1.9892E+00  | 1.1603E+00  |
| CCNA_01919 | 1.37119E-05 | 1.41312E-04 | -3.3651E+00 | -1.8931E+00 |
| CCNA_01920 | 1.76717E-04 | 3.71124E-05 | 2.2512E+00  | 1.3097E+00  |
| CCNA_01921 | 3.00458E-04 | 1.40945E-04 | 1.0920E+00  | 6.4865E-01  |
| CCNA_01922 | 1.31654E-04 | 1.40577E-04 | -9.4655E-02 | -2.8057E-02 |
| CCNA_01923 | 1.27247E-04 | 1.21837E-04 | 6.2634E-02  | 6.1641E-02  |
| CCNA_01924 | 3.86588E-05 | 8.83342E-05 | -1.1922E+00 | -6.5395E-01 |
| CCNA_01925 | 2.34896E-04 | 1.17972E-04 | 9.9351E-01  | 5.9250E-01  |
| CCNA_01926 | 2.44220E-04 | 1.21476E-04 | 1.0074E+00  | 6.0044E-01  |
| CCNA_01927 | 2.57258E-04 | 1.24268E-04 | 1.0497E+00  | 6.2453E-01  |
| CCNA_01928 | 2.23014E-05 | 1.43444E-04 | -2.6852E+00 | -1.5054E+00 |
| CCNA_01929 | 5.45376E-05 | 7.22510E-05 | -4.0583E-01 | -2.0552E-01 |
| CCNA_01930 | 3.26937E-05 | 1.44187E-04 | -2.1408E+00 | -1.1949E+00 |
| CCNA_01931 | 3.82134E-05 | 1.01873E-04 | -1.4146E+00 | -7.8080E-01 |
| CCNA_01932 | 4.97373E-05 | 4.36718E-05 | 1.8747E-01  | 1.3283E-01  |
| CCNA_01933 | 8.94615E-05 | 6.85435E-05 | 3.8414E-01  | 2.4499E-01  |
| CCNA_01934 | 1.31350E-04 | 1.08740E-04 | 2.7246E-01  | 1.8130E-01  |
| CCNA_01935 | 4.17377E-05 | 4.86326E-05 | -2.2069E-01 | -9.9934E-02 |
| CCNA_01936 | 9.78193E-05 | 5.63028E-05 | 7.9676E-01  | 4.8030E-01  |
| CCNA_01937 | 2.05498E-05 | 1.11607E-04 | -2.4411E+00 | -1.3662E+00 |
| CCNA_01938 | 3.57665E-05 | 8.22101E-05 | -1.2007E+00 | -6.5882E-01 |
| CCNA_01939 | 2.99245E-04 | 1.47099E-04 | 1.0245E+00  | 6.1016E-01  |
| CCNA_01940 | 1.82926E-05 | 4.70791E-05 | -1.3638E+00 | -7.5183E-01 |
| CCNA_01941 | 4.31432E-05 | 1.44817E-04 | -1.7470E+00 | -9.7035E-01 |
| CCNA_01942 | 1.39009E-04 | 3.05605E-05 | 2.1851E+00  | 1.2720E+00  |
| CCNA_01943 | 1.42214E-04 | 2.30630E-05 | 2.6240E+00  | 1.5223E+00  |
| CCNA_01944 | 3.63633E-04 | 7.41572E-05 | 2.2937E+00  | 1.3340E+00  |
| CCNA_01945 | 3.72364E-04 | 1.37365E-04 | 1.4386E+00  | 8.4635E-01  |
| CCNA_01946 | 3.63995E-04 | 1.24313E-04 | 1.5499E+00  | 9.0977E-01  |
| CCNA_01947 | 1.18402E-04 | 9.64997E-05 | 2.9502E-01  | 1.9417E-01  |
| CCNA_01948 | 1.69244E-04 | 6.78905E-05 | 1.3177E+00  | 7.7737E-01  |
| CCNA_01949 | 3.70005E-05 | 1.47384E-04 | -1.9939E+00 | -1.1112E+00 |
| CCNA_01950 | 6.92548E-05 | 7.00595E-05 | -1.6759E-02 | 1.6365E-02  |
| CCNA_01951 | 1.81030E-04 | 9.33926E-05 | 9.5475E-01  | 5.7040E-01  |
| CCNA_01952 | 1.72753E-04 | 1.47099E-04 | 2.3188E-01  | 1.5816E-01  |
| CCNA_01953 | 7.74621E-05 | 5.08016E-05 | 6.0846E-01  | 3.7291E-01  |
| CCNA_01954 | 6.30459E-05 | 1.88601E-05 | 1.7406E+00  | 1.0185E+00  |
| CCNA_01955 | 8.77309E-05 | 8.43115E-05 | 5.7277E-02  | 5.8586E-02  |
| CCNA_01956 | 3.65250E-05 | 7.28364E-05 | -9.9581E-01 | -5.4196E-01 |
| CCNA_01957 | 1.49209E-04 | 3.17163E-05 | 2.2337E+00  | 1.2998E+00  |
| CCNA_01958 | 1.98007E-04 | 1.46100E-04 | 4.3854E-01  | 2.7601E-01  |
| CCNA_01959 | 1.75221E-04 | 1.16748E-04 | 5.8571E-01  | 3.5994E-01  |

|            |             |             |             |             |
|------------|-------------|-------------|-------------|-------------|
| CCNA_01960 | 8.05229E-05 | 3.44556E-05 | 1.2244E+00  | 7.2417E-01  |
| CCNA_01961 | 2.67135E-05 | 7.34668E-05 | -1.4595E+00 | -8.0640E-01 |
| CCNA_01962 | 1.84346E-04 | 7.23560E-05 | 1.3491E+00  | 7.9529E-01  |
| CCNA_01963 | 1.05407E-04 | 1.25109E-05 | 3.0739E+00  | 1.7789E+00  |
| CCNA_01964 | 1.66881E-04 | 1.13514E-04 | 5.5589E-01  | 3.4293E-01  |
| CCNA_01965 | 1.57729E-04 | 5.86593E-05 | 1.4269E+00  | 8.3963E-01  |
| CCNA_01966 | 1.64149E-04 | 8.32008E-05 | 9.8023E-01  | 5.8493E-01  |
| CCNA_01967 | 9.39790E-05 | 1.38926E-04 | -5.6394E-01 | -2.9568E-01 |
| CCNA_01968 | 3.88996E-04 | 1.30145E-04 | 1.5796E+00  | 9.2671E-01  |
| CCNA_01969 | 1.57214E-04 | 7.40897E-05 | 1.0853E+00  | 6.4483E-01  |
| CCNA_01970 | 9.57306E-05 | 4.24485E-05 | 1.1731E+00  | 6.9489E-01  |
| CCNA_01971 | 7.72243E-05 | 2.63952E-05 | 1.5484E+00  | 9.0895E-01  |
| CCNA_01972 | 1.55333E-04 | 3.68947E-05 | 2.0736E+00  | 1.2085E+00  |
| CCNA_01973 | 1.77087E-04 | 6.65997E-05 | 1.4107E+00  | 8.3043E-01  |
| CCNA_01974 | 2.08580E-04 | 9.50212E-05 | 1.1342E+00  | 6.7272E-01  |
| CCNA_01975 | 1.25412E-04 | 1.37154E-04 | -1.2918E-01 | -4.7743E-02 |
| CCNA_01976 | 3.29194E-05 | 4.71841E-05 | -5.1946E-01 | -2.7031E-01 |
| CCNA_01977 | 2.79975E-04 | 1.47331E-04 | 9.2617E-01  | 5.5410E-01  |
| CCNA_01978 | 1.65804E-04 | 1.45162E-04 | 1.9176E-01  | 1.3528E-01  |
| CCNA_01979 | 1.34594E-04 | 1.77344E-05 | 2.9234E+00  | 1.6931E+00  |
| CCNA_01980 | 9.46802E-05 | 8.07467E-05 | 2.2957E-01  | 1.5684E-01  |
| CCNA_01981 | 2.24399E-05 | 5.07716E-05 | -1.1780E+00 | -6.4585E-01 |
| CCNA_01982 | 2.30057E-05 | 6.39354E-05 | -1.4746E+00 | -8.1501E-01 |
| CCNA_01983 | 2.28907E-04 | 4.60284E-05 | 2.3140E+00  | 1.3455E+00  |
| CCNA_01984 | 1.22011E-05 | 3.91012E-05 | -1.6801E+00 | -9.3222E-01 |
| CCNA_01985 | 1.98585E-04 | 9.34752E-05 | 1.0870E+00  | 6.4582E-01  |
| CCNA_01986 | 1.43379E-05 | 5.93573E-05 | -2.0495E+00 | -1.1428E+00 |
| CCNA_01987 | 9.91315E-05 | 1.46663E-04 | -5.6512E-01 | -2.9635E-01 |
| CCNA_01988 | 3.53572E-05 | 8.30507E-05 | -1.2320E+00 | -6.7666E-01 |
| CCNA_01989 | 1.68483E-04 | 1.44712E-04 | 2.1936E-01  | 1.5102E-01  |
| CCNA_01990 | 1.38798E-04 | 6.41305E-05 | 1.1138E+00  | 6.6108E-01  |
| CCNA_01991 | 2.35504E-05 | 8.79515E-05 | -1.9009E+00 | -1.0581E+00 |
| CCNA_01992 | 1.54536E-04 | 8.08817E-05 | 9.3395E-01  | 5.5853E-01  |
| CCNA_01993 | 1.72323E-04 | 4.50677E-05 | 1.9347E+00  | 1.1293E+00  |
| CCNA_01994 | 2.82752E-04 | 9.14864E-05 | 1.6278E+00  | 9.5422E-01  |
| CCNA_01995 | 4.72573E-05 | 3.08157E-05 | 6.1661E-01  | 3.7756E-01  |
| CCNA_01996 | 1.08768E-04 | 6.41530E-05 | 7.6154E-01  | 4.6021E-01  |
| CCNA_01997 | 7.81302E-05 | 6.98569E-05 | 1.6138E-01  | 1.1795E-01  |
| CCNA_01998 | 1.58506E-04 | 1.14752E-04 | 4.6595E-01  | 2.9164E-01  |
| CCNA_01999 | 2.39712E-04 | 4.40921E-05 | 2.4425E+00  | 1.4188E+00  |
| CCNA_02000 | 4.37601E-05 | 1.46663E-04 | -1.7448E+00 | -9.6909E-01 |
| CCNA_02001 | 1.10779E-04 | 1.15960E-04 | -6.6004E-02 | -1.1718E-02 |
| CCNA_02002 | 2.86186E-05 | 1.55654E-05 | 8.7807E-01  | 5.2666E-01  |
| CCNA_02003 | 3.73234E-04 | 1.15923E-04 | 1.6868E+00  | 9.8789E-01  |
| CCNA_02004 | 2.92543E-04 | 6.02579E-05 | 2.2793E+00  | 1.3257E+00  |
| CCNA_02005 | 3.56531E-04 | 7.38570E-05 | 2.2711E+00  | 1.3211E+00  |
| CCNA_02006 | 1.89186E-05 | 8.38462E-05 | -2.1478E+00 | -1.1989E+00 |
| CCNA_02007 | 1.33345E-04 | 6.77029E-05 | 9.7775E-01  | 5.8351E-01  |
| CCNA_02008 | 2.46670E-05 | 8.48369E-05 | -1.7821E+00 | -9.9035E-01 |
| CCNA_02009 | 1.01178E-04 | 1.43376E-04 | -5.0294E-01 | -2.6089E-01 |
| CCNA_02010 | 1.07035E-04 | 6.81907E-05 | 6.5031E-01  | 3.9678E-01  |
| CCNA_02011 | 1.30046E-04 | 1.29987E-04 | 6.0781E-04  | 2.6269E-02  |
| CCNA_02012 | 3.11889E-04 | 1.45808E-04 | 1.0969E+00  | 6.5146E-01  |

|            |             |             |             |             |
|------------|-------------|-------------|-------------|-------------|
| CCNA_02013 | 4.31070E-05 | 7.51554E-05 | -8.0200E-01 | -4.3144E-01 |
| CCNA_02014 | 1.15841E-04 | 4.32365E-05 | 1.4216E+00  | 8.3664E-01  |
| CCNA_02015 | 4.97764E-05 | 2.74759E-05 | 8.5699E-01  | 5.1464E-01  |
| CCNA_02016 | 4.71038E-05 | 1.39489E-04 | -1.5662E+00 | -8.6726E-01 |
| CCNA_02017 | 3.81321E-05 | 4.63886E-05 | -2.8288E-01 | -1.3540E-01 |
| CCNA_02018 | 4.89999E-05 | 1.33747E-04 | -1.4486E+00 | -8.0021E-01 |
| CCNA_02019 | 3.08864E-04 | 1.37950E-04 | 1.1628E+00  | 6.8902E-01  |
| CCNA_02020 | 2.56241E-05 | 1.17949E-04 | -2.2025E+00 | -1.2301E+00 |
| CCNA_02021 | 6.24169E-05 | 4.01895E-05 | 6.3492E-01  | 3.8800E-01  |
| CCNA_02022 | 4.58789E-05 | 1.38393E-04 | -1.5928E+00 | -8.8244E-01 |
| CCNA_02023 | 5.03723E-05 | 7.42548E-05 | -5.5991E-01 | -2.9338E-01 |
| CCNA_02024 | 1.63661E-04 | 8.73211E-05 | 9.0621E-01  | 5.4271E-01  |
| CCNA_02025 | 4.87140E-05 | 1.27150E-04 | -1.3841E+00 | -7.6341E-01 |
| CCNA_02026 | 2.00713E-05 | 3.96566E-05 | -9.8249E-01 | -5.3437E-01 |
| CCNA_02027 | 2.12330E-05 | 8.68032E-05 | -2.0314E+00 | -1.1325E+00 |
| CCNA_02028 | 6.78583E-05 | 9.74904E-05 | -5.2278E-01 | -2.7221E-01 |
| CCNA_02029 | 6.02830E-05 | 8.99178E-05 | -5.7690E-01 | -3.0307E-01 |
| CCNA_02030 | 2.36636E-04 | 1.47099E-04 | 6.8583E-01  | 4.1704E-01  |
| CCNA_02031 | 1.75146E-04 | 1.46491E-04 | 2.5770E-01  | 1.7288E-01  |
| CCNA_02032 | 1.00534E-04 | 1.47099E-04 | -5.4913E-01 | -2.8724E-01 |
| CCNA_02033 | 2.21961E-04 | 4.11801E-05 | 2.4300E+00  | 1.4117E+00  |
| CCNA_02034 | 1.48234E-04 | 1.30603E-04 | 1.8264E-01  | 1.3008E-01  |
| CCNA_02035 | 2.90000E-04 | 8.90547E-05 | 1.7032E+00  | 9.9721E-01  |
| CCNA_02036 | 8.21721E-05 | 1.35623E-04 | -7.2291E-01 | -3.8634E-01 |
| CCNA_02037 | 1.12440E-04 | 1.18880E-04 | -8.0399E-02 | -1.9927E-02 |
| CCNA_02038 | 1.31976E-04 | 1.25101E-04 | 7.7120E-02  | 6.9902E-02  |
| CCNA_02039 | 9.76387E-05 | 9.04657E-05 | 1.1001E-01  | 8.8657E-02  |
| CCNA_02040 | 1.61037E-04 | 1.44712E-04 | 1.5416E-01  | 1.1383E-01  |
| CCNA_02041 | 1.86200E-04 | 8.35610E-05 | 1.1558E+00  | 6.8508E-01  |
| CCNA_02042 | 1.02111E-04 | 5.94399E-05 | 7.8050E-01  | 4.7102E-01  |
| CCNA_02043 | 1.14339E-04 | 1.46333E-04 | -3.5597E-01 | -1.7708E-01 |
| CCNA_02044 | 1.19808E-04 | 1.13221E-04 | 8.1520E-02  | 7.2412E-02  |
| CCNA_02045 | 3.04115E-04 | 9.17415E-05 | 1.7289E+00  | 1.0119E+00  |
| CCNA_02046 | 2.97644E-04 | 7.38495E-05 | 2.0108E+00  | 1.1726E+00  |
| CCNA_02047 | 9.00995E-05 | 1.42843E-04 | -6.6487E-01 | -3.5324E-01 |
| CCNA_02048 | 9.64228E-05 | 3.40804E-05 | 1.5002E+00  | 8.8143E-01  |
| CCNA_02049 | 1.51150E-04 | 4.35067E-05 | 1.7965E+00  | 1.0504E+00  |
| CCNA_02050 | 1.52140E-04 | 6.22543E-05 | 1.2890E+00  | 7.6102E-01  |
| CCNA_02051 | 1.16262E-05 | 2.76110E-05 | -1.2479E+00 | -6.8572E-01 |
| CCNA_02052 | 1.80380E-04 | 3.73225E-05 | 2.2727E+00  | 1.3220E+00  |
| CCNA_02053 | 1.58758E-05 | 7.81949E-05 | -2.3001E+00 | -1.2858E+00 |
| CCNA_02054 | 1.76214E-05 | 1.24201E-04 | -2.8171E+00 | -1.5806E+00 |
| CCNA_02055 | 1.48405E-05 | 4.80472E-05 | -1.6948E+00 | -9.4061E-01 |
| CCNA_02056 | 1.91353E-05 | 6.15188E-05 | -1.6847E+00 | -9.3485E-01 |
| CCNA_02057 | 1.99870E-05 | 4.65387E-05 | -1.2194E+00 | -6.6947E-01 |
| CCNA_02058 | 1.82565E-05 | 6.14212E-05 | -1.7503E+00 | -9.7222E-01 |
| CCNA_02059 | 1.86628E-05 | 8.48219E-05 | -2.1842E+00 | -1.2197E+00 |
| CCNA_02060 | 4.62190E-05 | 1.11180E-04 | -1.2663E+00 | -6.9624E-01 |
| CCNA_02061 | 3.47222E-05 | 9.90514E-05 | -1.5123E+00 | -8.3651E-01 |
| CCNA_02062 | 2.60550E-04 | 5.71658E-05 | 2.1882E+00  | 1.2738E+00  |
| CCNA_02063 | 1.68233E-04 | 1.01543E-04 | 7.2829E-01  | 4.4125E-01  |
| CCNA_02064 | 1.15447E-04 | 4.86101E-05 | 1.2477E+00  | 7.3747E-01  |
| CCNA_02065 | 1.02857E-04 | 7.46901E-05 | 4.6155E-01  | 2.8914E-01  |

|            |             |             |             |             |
|------------|-------------|-------------|-------------|-------------|
| CCNA_02066 | 1.03161E-04 | 8.01763E-05 | 3.6356E-01  | 2.3325E-01  |
| CCNA_02067 | 1.21021E-04 | 9.19217E-05 | 3.9669E-01  | 2.5215E-01  |
| CCNA_02068 | 1.81090E-05 | 5.22801E-05 | -1.5295E+00 | -8.4633E-01 |
| CCNA_02069 | 1.22583E-04 | 1.41350E-04 | -2.0556E-01 | -9.1302E-02 |
| CCNA_02070 | 2.31893E-05 | 4.48651E-05 | -9.5219E-01 | -5.1709E-01 |
| CCNA_02071 | 7.72393E-05 | 7.37295E-05 | 6.7004E-02  | 6.4134E-02  |
| CCNA_02072 | 5.72343E-05 | 1.14850E-04 | -1.0048E+00 | -5.4710E-01 |
| CCNA_02073 | 4.06512E-05 | 9.60644E-06 | 2.0802E+00  | 1.2122E+00  |
| CCNA_02074 | 2.16182E-05 | 7.95158E-05 | -1.8789E+00 | -1.0456E+00 |
| CCNA_02075 | 1.58617E-04 | 1.07465E-04 | 5.6161E-01  | 3.4620E-01  |
| CCNA_02076 | 7.25744E-05 | 4.78221E-05 | 6.0162E-01  | 3.6901E-01  |
| CCNA_02077 | 1.57645E-04 | 5.79464E-05 | 1.4437E+00  | 8.4925E-01  |
| CCNA_02078 | 1.68037E-04 | 8.95426E-05 | 9.0804E-01  | 5.4376E-01  |
| CCNA_02079 | 6.28172E-05 | 1.41117E-04 | -1.1677E+00 | -6.3997E-01 |
| CCNA_02080 | 1.41661E-04 | 1.27886E-04 | 1.4753E-01  | 1.1006E-01  |
| CCNA_02081 | 2.96507E-04 | 7.73394E-05 | 1.9387E+00  | 1.1315E+00  |
| CCNA_02082 | 3.24385E-04 | 1.03247E-04 | 1.6515E+00  | 9.6775E-01  |
| CCNA_02083 | 1.83136E-05 | 5.06965E-05 | -1.4689E+00 | -8.1178E-01 |
| CCNA_02084 | 1.05945E-04 | 9.71301E-05 | 1.2526E-01  | 9.7354E-02  |
| CCNA_02085 | 4.08348E-05 | 5.31582E-05 | -3.8059E-01 | -1.9112E-01 |
| CCNA_02086 | 1.16304E-04 | 5.48543E-05 | 1.0841E+00  | 6.4414E-01  |
| CCNA_02087 | 1.04266E-04 | 5.43815E-05 | 9.3892E-01  | 5.6137E-01  |
| CCNA_02088 | 1.07751E-04 | 8.35010E-05 | 3.6775E-01  | 2.3564E-01  |
| CCNA_02089 | 1.42473E-04 | 1.01551E-04 | 4.8842E-01  | 3.0446E-01  |
| CCNA_02090 | 1.73226E-04 | 3.07481E-05 | 2.4938E+00  | 1.4481E+00  |
| CCNA_02091 | 2.31968E-04 | 5.42839E-05 | 2.0951E+00  | 1.2207E+00  |
| CCNA_02092 | 1.67556E-04 | 1.00117E-04 | 7.4287E-01  | 4.4956E-01  |
| CCNA_02093 | 2.08460E-04 | 1.36637E-04 | 6.0936E-01  | 3.7343E-01  |
| CCNA_02094 | 2.58937E-04 | 8.13546E-05 | 1.6702E+00  | 9.7839E-01  |
| CCNA_02095 | 2.68541E-04 | 1.15367E-04 | 1.2188E+00  | 7.2099E-01  |
| CCNA_02096 | 1.83970E-04 | 3.91162E-05 | 2.2334E+00  | 1.2996E+00  |
| CCNA_02097 | 1.35747E-04 | 9.03981E-05 | 5.8646E-01  | 3.6037E-01  |
| CCNA_02098 | 1.58987E-04 | 1.20478E-04 | 4.0007E-01  | 2.5408E-01  |
| CCNA_02099 | 5.44173E-05 | 2.64778E-05 | 1.0390E+00  | 6.1841E-01  |
| CCNA_02100 | 2.85470E-04 | 7.04122E-05 | 2.0193E+00  | 1.1775E+00  |
| CCNA_02101 | 2.37403E-04 | 9.51863E-05 | 1.3184E+00  | 7.7779E-01  |
| CCNA_02102 | 5.21892E-04 | 1.47099E-04 | 1.8269E+00  | 1.0678E+00  |
| CCNA_02103 | 1.22080E-04 | 9.63571E-05 | 3.4129E-01  | 2.2055E-01  |
| CCNA_02104 | 4.54245E-05 | 7.66114E-05 | -7.5413E-01 | -4.0414E-01 |
| CCNA_02105 | 2.64577E-05 | 1.45538E-04 | -2.4595E+00 | -1.3767E+00 |
| CCNA_02106 | 1.30504E-04 | 1.26400E-04 | 4.6047E-02  | 5.2182E-02  |
| CCNA_02107 | 4.51813E-04 | 4.06398E-05 | 3.4745E+00  | 2.0074E+00  |
| CCNA_02108 | 9.01928E-05 | 5.14470E-05 | 8.0976E-01  | 4.8771E-01  |
| CCNA_02109 | 1.19591E-04 | 3.97992E-05 | 1.5871E+00  | 9.3099E-01  |
| CCNA_02110 | 1.60188E-04 | 5.18223E-05 | 1.6279E+00  | 9.5430E-01  |
| CCNA_02111 | 4.25150E-04 | 3.29696E-05 | 3.6884E+00  | 2.1294E+00  |
| CCNA_02112 | 4.06506E-04 | 3.11384E-05 | 3.7062E+00  | 2.1395E+00  |
| CCNA_02113 | 1.11980E-04 | 1.20906E-04 | -1.1070E-01 | -3.7208E-02 |
| CCNA_02114 | 1.54455E-05 | 9.79857E-05 | -2.6652E+00 | -1.4940E+00 |
| CCNA_02115 | 1.67095E-05 | 9.42332E-05 | -2.4954E+00 | -1.3972E+00 |
| CCNA_02116 | 1.08642E-04 | 4.27036E-05 | 1.3469E+00  | 7.9405E-01  |
| CCNA_02117 | 1.56080E-05 | 9.07659E-05 | -2.5397E+00 | -1.4224E+00 |
| CCNA_02118 | 2.38424E-05 | 6.67948E-05 | -1.4862E+00 | -8.2162E-01 |



|            |             |             |             |             |
|------------|-------------|-------------|-------------|-------------|
| CCNA_02119 | 1.49769E-04 | 7.20633E-05 | 1.0553E+00  | 6.2772E-01  |
| CCNA_02120 | 1.35413E-04 | 1.29762E-04 | 6.1443E-02  | 6.0962E-02  |
| CCNA_02121 | 1.65407E-04 | 1.47016E-04 | 1.7000E-01  | 1.2287E-01  |
| CCNA_02122 | 1.38835E-05 | 1.00215E-04 | -2.8515E+00 | -1.6002E+00 |
| CCNA_02123 | 4.66494E-06 | 0.00000E+00 | 9.2807E+00  | 5.3185E+00  |
| CCNA_02124 | 1.08687E-04 | 1.11397E-04 | -3.5590E-02 | 5.6261E-03  |
| CCNA_02125 | 7.84110E-04 | 1.44652E-04 | 2.4384E+00  | 1.4165E+00  |
| CCNA_02126 | 7.78289E-04 | 1.42558E-04 | 2.4487E+00  | 1.4224E+00  |
| CCNA_02127 | 1.82059E-04 | 1.44374E-04 | 3.3454E-01  | 2.1670E-01  |
| CCNA_02128 | 1.84644E-04 | 1.46828E-04 | 3.3057E-01  | 2.1444E-01  |
| CCNA_02129 | 9.35034E-05 | 1.13349E-04 | -2.7772E-01 | -1.3246E-01 |
| CCNA_02130 | 1.49829E-04 | 1.28681E-04 | 2.1946E-01  | 1.5107E-01  |
| CCNA_02131 | 6.89929E-05 | 1.20111E-04 | -7.9987E-01 | -4.3023E-01 |
| CCNA_02132 | 4.27059E-04 | 1.48284E-04 | 1.5260E+00  | 8.9617E-01  |
| CCNA_02133 | 2.60484E-05 | 3.63469E-05 | -4.8077E-01 | -2.4825E-01 |
| CCNA_02134 | 1.63342E-04 | 3.26919E-05 | 2.3206E+00  | 1.3493E+00  |
| CCNA_02135 | 2.59130E-05 | 3.56564E-05 | -4.6062E-01 | -2.3676E-01 |
| CCNA_02136 | 1.55764E-04 | 1.27668E-04 | 2.8690E-01  | 1.8954E-01  |
| CCNA_02137 | 9.47735E-06 | 5.78488E-05 | -2.6095E+00 | -1.4622E+00 |
| CCNA_02138 | 3.50563E-05 | 6.77629E-05 | -9.5086E-01 | -5.1633E-01 |
| CCNA_02139 | 2.22472E-05 | 3.21215E-05 | -5.3006E-01 | -2.7636E-01 |
| CCNA_02140 | 2.41572E-04 | 7.17256E-05 | 1.7518E+00  | 1.0249E+00  |
| CCNA_02141 | 5.40344E-04 | 6.33200E-05 | 3.0930E+00  | 1.7898E+00  |
| CCNA_02142 | 5.44832E-04 | 6.84459E-05 | 2.9926E+00  | 1.7325E+00  |
| CCNA_02143 | 1.85565E-04 | 1.24936E-04 | 5.7067E-01  | 3.5136E-01  |
| CCNA_02144 | 4.09311E-05 | 9.70401E-05 | -1.2454E+00 | -6.8430E-01 |
| CCNA_02145 | 1.15961E-04 | 7.30765E-05 | 6.6605E-01  | 4.0576E-01  |
| CCNA_02146 | 5.32525E-05 | 3.48534E-05 | 6.1132E-01  | 3.7455E-01  |
| CCNA_02147 | 1.48905E-04 | 5.15896E-05 | 1.5291E+00  | 8.9791E-01  |
| CCNA_02148 | 2.12029E-05 | 1.40787E-04 | -2.7311E+00 | -1.5315E+00 |
| CCNA_02149 | 1.54963E-04 | 8.83342E-05 | 8.1079E-01  | 4.8830E-01  |
| CCNA_02150 | 1.10959E-04 | 1.24666E-04 | -1.6809E-01 | -6.9933E-02 |
| CCNA_02151 | 1.45952E-04 | 8.07091E-05 | 8.5459E-01  | 5.1328E-01  |
| CCNA_02152 | 1.87317E-04 | 3.84858E-05 | 2.2828E+00  | 1.3278E+00  |
| CCNA_02153 | 2.02446E-04 | 8.59777E-05 | 1.2354E+00  | 7.3044E-01  |
| CCNA_02154 | 2.60243E-04 | 1.18054E-05 | 4.4614E+00  | 2.5702E+00  |
| CCNA_02155 | 7.65863E-05 | 2.81139E-05 | 1.4455E+00  | 8.5024E-01  |
| CCNA_02156 | 1.00329E-04 | 3.69698E-05 | 1.4401E+00  | 8.4716E-01  |
| CCNA_02157 | 1.38498E-04 | 1.41117E-04 | -2.7079E-02 | 1.0480E-02  |
| CCNA_02158 | 1.40710E-04 | 1.20523E-04 | 2.2335E-01  | 1.5329E-01  |
| CCNA_02159 | 8.55580E-05 | 9.22744E-05 | -1.0909E-01 | -3.6292E-02 |
| CCNA_02160 | 5.88186E-04 | 1.08335E-04 | 2.4407E+00  | 1.4178E+00  |
| CCNA_02161 | 5.20111E-04 | 1.37875E-04 | 1.9154E+00  | 1.1182E+00  |
| CCNA_02162 | 3.16521E-04 | 1.02871E-04 | 1.6214E+00  | 9.5055E-01  |
| CCNA_02163 | 3.54587E-04 | 7.56507E-05 | 2.2286E+00  | 1.2968E+00  |
| CCNA_02164 | 1.76278E-04 | 1.25537E-04 | 4.8968E-01  | 3.0517E-01  |
| CCNA_02165 | 1.94856E-04 | 4.78821E-05 | 2.0246E+00  | 1.1805E+00  |
| CCNA_02166 | 7.58489E-05 | 4.59233E-05 | 7.2372E-01  | 4.3865E-01  |
| CCNA_02167 | 1.66409E-04 | 6.07758E-05 | 1.4530E+00  | 8.5454E-01  |
| CCNA_04007 | 5.17929E-05 | 1.45508E-04 | -1.4903E+00 | -8.2394E-01 |
| CCNA_02169 | 6.19715E-05 | 1.40164E-04 | -1.1774E+00 | -6.4555E-01 |
| CCNA_02170 | 9.95979E-05 | 1.44630E-04 | -5.3821E-01 | -2.8100E-01 |
| CCNA_02171 | 2.06500E-04 | 1.36051E-04 | 6.0194E-01  | 3.6919E-01  |

|            |             |             |             |             |
|------------|-------------|-------------|-------------|-------------|
| CCNA_02172 | 2.00601E-04 | 1.46648E-04 | 4.5192E-01  | 2.8364E-01  |
| CCNA_02173 | 7.02058E-05 | 8.17298E-05 | -2.1934E-01 | -9.9164E-02 |
| CCNA_02174 | 5.43240E-05 | 3.24818E-05 | 7.4170E-01  | 4.4890E-01  |
| CCNA_02175 | 2.06491E-05 | 1.15705E-04 | -2.4862E+00 | -1.3919E+00 |
| CCNA_02176 | 7.38505E-05 | 1.29957E-04 | -8.1538E-01 | -4.3907E-01 |
| CCNA_02177 | 1.60925E-05 | 8.17974E-05 | -2.3455E+00 | -1.3117E+00 |
| CCNA_02178 | 4.01094E-05 | 2.96899E-05 | 4.3371E-01  | 2.7326E-01  |
| CCNA_02179 | 1.36487E-05 | 7.03447E-05 | -2.3655E+00 | -1.3231E+00 |
| CCNA_02180 | 1.32653E-04 | 9.06833E-05 | 5.4866E-01  | 3.3881E-01  |
| CCNA_02181 | 8.58830E-05 | 5.42239E-05 | 6.6330E-01  | 4.0419E-01  |
| CCNA_02182 | 1.46371E-04 | 9.90214E-05 | 5.6373E-01  | 3.4741E-01  |
| CCNA_02183 | 1.70990E-04 | 4.74018E-05 | 1.8507E+00  | 1.0813E+00  |
| CCNA_02184 | 1.05382E-04 | 5.77512E-05 | 8.6757E-01  | 5.2068E-01  |
| CCNA_02185 | 1.78168E-04 | 1.47099E-04 | 2.7640E-01  | 1.8355E-01  |
| CCNA_02186 | 9.16194E-05 | 1.41695E-04 | -6.2909E-01 | -3.3284E-01 |
| CCNA_02187 | 5.91803E-04 | 6.60218E-05 | 3.1639E+00  | 1.8303E+00  |
| CCNA_02188 | 9.49330E-05 | 1.18632E-04 | -3.2156E-01 | -1.5745E-01 |
| CCNA_02189 | 1.89126E-04 | 4.86401E-05 | 1.9589E+00  | 1.1431E+00  |
| CCNA_02190 | 4.43440E-05 | 1.31165E-04 | -1.5646E+00 | -8.6631E-01 |
| CCNA_02191 | 2.39146E-05 | 8.56700E-05 | -1.8408E+00 | -1.0239E+00 |
| CCNA_02192 | 2.92543E-04 | 1.35308E-04 | 1.1123E+00  | 6.6026E-01  |
| CCNA_02193 | 8.32857E-05 | 1.42198E-04 | -7.7178E-01 | -4.1421E-01 |
| CCNA_02194 | 1.15441E-04 | 7.72718E-05 | 5.7903E-01  | 3.5613E-01  |
| CCNA_02195 | 5.36348E-05 | 1.47099E-04 | -1.4555E+00 | -8.0414E-01 |
| CCNA_02196 | 2.92242E-04 | 5.86293E-05 | 2.3173E+00  | 1.3474E+00  |
| CCNA_02197 | 2.79565E-05 | 4.68014E-05 | -7.4344E-01 | -3.9805E-01 |
| CCNA_02198 | 6.06382E-05 | 1.31878E-04 | -1.1209E+00 | -6.1331E-01 |
| CCNA_02199 | 4.05669E-05 | 1.42603E-04 | -1.8136E+00 | -1.0083E+00 |
| CCNA_02200 | 2.31992E-04 | 1.33462E-04 | 7.9758E-01  | 4.8077E-01  |
| CCNA_02201 | 2.71776E-04 | 1.16456E-04 | 1.2226E+00  | 7.2312E-01  |
| CCNA_02202 | 3.25179E-04 | 1.44059E-04 | 1.1745E+00  | 6.9572E-01  |
| CCNA_02203 | 1.20208E-04 | 7.12153E-05 | 7.5516E-01  | 4.5657E-01  |
| CCNA_02204 | 8.31112E-05 | 1.38363E-04 | -7.3537E-01 | -3.9344E-01 |
| CCNA_02205 | 4.24636E-04 | 1.47099E-04 | 1.5294E+00  | 8.9809E-01  |
| CCNA_02206 | 1.89120E-04 | 1.18992E-04 | 6.6836E-01  | 4.0707E-01  |
| CCNA_02207 | 4.73991E-04 | 1.39549E-04 | 1.7640E+00  | 1.0319E+00  |
| CCNA_02208 | 2.49640E-04 | 4.99685E-05 | 2.3206E+00  | 1.3493E+00  |
| CCNA_02209 | 4.02930E-05 | 1.20486E-04 | -1.5802E+00 | -8.7525E-01 |
| CCNA_02210 | 2.21238E-05 | 6.23218E-05 | -1.4941E+00 | -8.2614E-01 |
| CCNA_02211 | 1.07038E-04 | 5.25728E-05 | 1.0256E+00  | 6.1078E-01  |
| CCNA_02212 | 2.49421E-04 | 7.70317E-05 | 1.6949E+00  | 9.9251E-01  |
| CCNA_02213 | 2.92868E-05 | 6.50161E-05 | -1.1506E+00 | -6.3022E-01 |
| CCNA_02214 | 2.40530E-05 | 8.39363E-05 | -1.8030E+00 | -1.0023E+00 |
| CCNA_02215 | 1.92677E-05 | 1.40322E-04 | -2.8643E+00 | -1.6075E+00 |
| CCNA_02216 | 2.09651E-05 | 5.20324E-05 | -1.3114E+00 | -7.2195E-01 |
| CCNA_02217 | 4.58669E-05 | 9.50888E-05 | -1.0518E+00 | -5.7392E-01 |
| CCNA_02218 | 2.12751E-05 | 3.10934E-05 | -5.4758E-01 | -2.8635E-01 |
| CCNA_02219 | 2.88293E-05 | 5.36085E-05 | -8.9498E-01 | -4.8446E-01 |
| CCNA_02220 | 2.50191E-05 | 7.06449E-05 | -1.4975E+00 | -8.2809E-01 |
| CCNA_02221 | 6.16615E-05 | 9.07809E-05 | -5.5807E-01 | -2.9233E-01 |
| CCNA_02222 | 3.75844E-05 | 1.47339E-04 | -1.9709E+00 | -1.0980E+00 |
| CCNA_02223 | 7.76186E-05 | 1.85449E-05 | 2.0648E+00  | 1.2035E+00  |
| CCNA_02224 | 7.76607E-05 | 8.98953E-05 | -2.1113E-01 | -9.4478E-02 |

|            |             |             |             |             |
|------------|-------------|-------------|-------------|-------------|
| CCNA_02225 | 2.00963E-04 | 1.03614E-04 | 9.5562E-01  | 5.7089E-01  |
| CCNA_02226 | 7.97253E-05 | 9.26271E-05 | -2.1646E-01 | -9.7519E-02 |
| CCNA_02227 | 2.16393E-04 | 1.39406E-04 | 6.3430E-01  | 3.8765E-01  |
| CCNA_02228 | 2.04701E-04 | 1.37425E-04 | 5.7482E-01  | 3.5373E-01  |
| CCNA_02229 | 2.45526E-05 | 9.02180E-05 | -1.8775E+00 | -1.0448E+00 |
| CCNA_02230 | 1.76756E-05 | 1.32539E-04 | -2.9064E+00 | -1.6315E+00 |
| CCNA_02231 | 2.16182E-05 | 1.13986E-04 | -2.3984E+00 | -1.3419E+00 |
| CCNA_02232 | 1.97071E-05 | 1.23390E-04 | -2.6463E+00 | -1.4832E+00 |
| CCNA_02233 | 3.12972E-05 | 7.57558E-05 | -1.2753E+00 | -7.0137E-01 |
| CCNA_02234 | 9.25343E-05 | 8.18949E-05 | 1.7613E-01  | 1.2637E-01  |
| CCNA_02235 | 9.02229E-05 | 7.44049E-05 | 2.7800E-01  | 1.8446E-01  |
| CCNA_02236 | 6.28322E-05 | 7.80523E-05 | -3.1301E-01 | -1.5258E-01 |
| CCNA_02237 | 2.03993E-05 | 1.19743E-04 | -2.5532E+00 | -1.4301E+00 |
| CCNA_02238 | 2.92085E-05 | 9.29799E-05 | -1.6705E+00 | -9.2672E-01 |
| CCNA_02239 | 1.71610E-05 | 1.25724E-04 | -2.8729E+00 | -1.6124E+00 |
| CCNA_02240 | 1.10761E-04 | 8.85969E-05 | 3.2203E-01  | 2.0957E-01  |
| CCNA_02241 | 1.24322E-04 | 1.47129E-04 | -2.4303E-01 | -1.1267E-01 |
| CCNA_02242 | 1.29764E-04 | 1.45755E-04 | -1.6770E-01 | -6.9715E-02 |
| CCNA_02243 | 1.25664E-04 | 1.43879E-04 | -1.9532E-01 | -8.5464E-02 |
| CCNA_02244 | 8.56573E-05 | 8.27805E-05 | 4.9205E-02  | 5.3983E-02  |
| CCNA_02245 | 3.70276E-05 | 3.04179E-05 | 2.8344E-01  | 1.8756E-01  |
| CCNA_02246 | 2.76712E-04 | 1.47099E-04 | 9.1154E-01  | 5.4576E-01  |
| CCNA_02247 | 2.77040E-04 | 1.47099E-04 | 9.1325E-01  | 5.4673E-01  |
| CCNA_02248 | 2.10317E-04 | 1.40539E-04 | 5.8153E-01  | 3.5756E-01  |
| CCNA_02249 | 8.66565E-05 | 5.68356E-05 | 6.0837E-01  | 3.7286E-01  |
| CCNA_02250 | 3.39156E-05 | 1.12320E-04 | -1.7276E+00 | -9.5927E-01 |
| CCNA_02251 | 1.97998E-04 | 7.33917E-05 | 1.4317E+00  | 8.4237E-01  |
| CCNA_02252 | 2.46531E-04 | 8.11669E-05 | 1.6027E+00  | 9.3990E-01  |
| CCNA_02253 | 2.30469E-04 | 1.14046E-04 | 1.0149E+00  | 6.0468E-01  |
| CCNA_02254 | 2.22683E-05 | 6.25845E-05 | -1.4908E+00 | -8.2424E-01 |
| CCNA_02255 | 1.33315E-04 | 9.00529E-05 | 5.6591E-01  | 3.4865E-01  |
| CCNA_02256 | 4.34134E-04 | 1.32764E-04 | 1.7092E+00  | 1.0006E+00  |
| CCNA_02257 | 1.27997E-04 | 1.27293E-04 | 7.9060E-03  | 3.0431E-02  |
| CCNA_02258 | 4.11619E-04 | 1.18219E-04 | 1.7998E+00  | 1.0523E+00  |
| CCNA_02259 | 1.77629E-05 | 1.09829E-04 | -2.6282E+00 | -1.4729E+00 |
| CCNA_02260 | 1.50954E-04 | 1.29875E-04 | 2.1694E-01  | 1.4964E-01  |
| CCNA_02261 | 1.68720E-05 | 7.82625E-05 | -2.2136E+00 | -1.2364E+00 |
| CCNA_02262 | 1.71459E-05 | 1.42130E-04 | -3.0511E+00 | -1.7141E+00 |
| CCNA_02263 | 5.62110E-05 | 9.39930E-05 | -7.4174E-01 | -3.9707E-01 |
| CCNA_02264 | 6.91645E-05 | 6.35826E-05 | 1.2129E-01  | 9.5092E-02  |
| CCNA_02265 | 7.54727E-05 | 1.34175E-04 | -8.3011E-01 | -4.4747E-01 |
| CCNA_02266 | 3.53632E-05 | 1.43714E-04 | -2.0228E+00 | -1.1277E+00 |
| CCNA_02267 | 2.29365E-05 | 5.35409E-05 | -1.2230E+00 | -6.7153E-01 |
| CCNA_02268 | 1.36875E-04 | 1.38618E-05 | 3.3029E+00  | 1.9095E+00  |
| CCNA_02269 | 2.65679E-04 | 9.42857E-05 | 1.4945E+00  | 8.7819E-01  |
| CCNA_02270 | 7.34051E-05 | 5.91322E-05 | 3.1181E-01  | 2.0374E-01  |
| CCNA_02271 | 1.98600E-04 | 1.47099E-04 | 4.3303E-01  | 2.7287E-01  |
| CCNA_02272 | 2.85196E-04 | 5.27829E-05 | 2.4336E+00  | 1.4138E+00  |
| CCNA_02273 | 3.24279E-04 | 1.46611E-04 | 1.1452E+00  | 6.7900E-01  |
| CCNA_02274 | 1.83988E-04 | 1.46296E-04 | 3.3068E-01  | 2.1450E-01  |
| CCNA_02275 | 9.17578E-05 | 1.20231E-04 | -3.8994E-01 | -1.9645E-01 |
| CCNA_02276 | 4.58518E-05 | 6.72901E-05 | -5.5348E-01 | -2.8972E-01 |
| CCNA_02277 | 9.11860E-05 | 1.40389E-04 | -6.2258E-01 | -3.2912E-01 |

|            |             |             |             |             |
|------------|-------------|-------------|-------------|-------------|
| CCNA_02278 | 6.94835E-05 | 6.26595E-05 | 1.4903E-01  | 1.1091E-01  |
| CCNA_02279 | 1.41769E-04 | 3.91763E-05 | 1.8552E+00  | 1.0839E+00  |
| CCNA_02280 | 6.77409E-05 | 1.63009E-05 | 2.0545E+00  | 1.1975E+00  |
| CCNA_02281 | 2.68080E-04 | 4.47150E-05 | 2.5836E+00  | 1.4993E+00  |
| CCNA_02282 | 9.96431E-05 | 7.90505E-05 | 3.3390E-01  | 2.1634E-01  |
| CCNA_02283 | 4.27525E-04 | 1.16816E-04 | 1.8717E+00  | 1.0933E+00  |
| CCNA_02284 | 1.89156E-05 | 1.32734E-04 | -2.8107E+00 | -1.5770E+00 |
| CCNA_02285 | 3.56552E-05 | 8.76888E-05 | -1.2983E+00 | -7.1446E-01 |
| CCNA_02286 | 1.98826E-04 | 9.90064E-05 | 1.0058E+00  | 5.9952E-01  |
| CCNA_02287 | 1.63718E-04 | 1.16343E-04 | 4.9276E-01  | 3.0693E-01  |
| CCNA_02288 | 7.97494E-05 | 1.46768E-04 | -8.8002E-01 | -4.7593E-01 |
| CCNA_02289 | 5.54165E-05 | 8.58651E-05 | -6.3180E-01 | -3.3438E-01 |
| CCNA_02290 | 1.25809E-04 | 6.85435E-05 | 8.7602E-01  | 5.2550E-01  |
| CCNA_02291 | 2.24775E-04 | 1.15532E-04 | 9.6011E-01  | 5.7345E-01  |
| CCNA_02292 | 1.68407E-04 | 9.49762E-05 | 8.2623E-01  | 4.9710E-01  |
| CCNA_02293 | 3.20918E-05 | 9.69425E-05 | -1.5949E+00 | -8.8361E-01 |
| CCNA_02294 | 2.31983E-05 | 1.25852E-04 | -2.4395E+00 | -1.3653E+00 |
| CCNA_02295 | 8.11338E-05 | 1.36427E-04 | -7.4977E-01 | -4.0166E-01 |
| CCNA_02296 | 1.37134E-04 | 3.76978E-05 | 1.8628E+00  | 1.0882E+00  |
| CCNA_02297 | 1.62776E-04 | 4.38069E-05 | 1.8934E+00  | 1.1057E+00  |
| CCNA_02298 | 1.69033E-04 | 1.18197E-04 | 5.1605E-01  | 3.2021E-01  |
| CCNA_02299 | 2.36828E-04 | 4.63211E-05 | 2.3539E+00  | 1.3683E+00  |
| CCNA_02300 | 5.87602E-05 | 4.61034E-05 | 3.4980E-01  | 2.2541E-01  |
| CCNA_02301 | 3.74911E-05 | 5.91622E-05 | -6.5820E-01 | -3.4943E-01 |
| CCNA_02302 | 2.10810E-04 | 4.20882E-05 | 2.3242E+00  | 1.3514E+00  |
| CCNA_02303 | 4.33237E-05 | 1.05476E-04 | -1.2837E+00 | -7.0613E-01 |
| CCNA_02304 | 2.61387E-05 | 4.57957E-05 | -8.0910E-01 | -4.3549E-01 |
| CCNA_02305 | 2.62233E-04 | 1.04793E-04 | 1.3232E+00  | 7.8053E-01  |
| CCNA_02306 | 1.29812E-04 | 6.87986E-05 | 9.1584E-01  | 5.4821E-01  |
| CCNA_02307 | 2.56271E-05 | 1.00620E-04 | -1.9731E+00 | -1.0993E+00 |
| CCNA_02308 | 2.43576E-04 | 5.52446E-05 | 2.1403E+00  | 1.2465E+00  |
| CCNA_02309 | 2.42192E-04 | 5.26553E-05 | 2.2013E+00  | 1.2813E+00  |
| CCNA_02310 | 6.65341E-05 | 6.65096E-05 | 4.3292E-04  | 2.6169E-02  |
| CCNA_04009 | 2.19842E-04 | 5.62652E-05 | 1.9660E+00  | 1.1471E+00  |
| CCNA_02312 | 1.70421E-04 | 1.05408E-04 | 6.9304E-01  | 4.2115E-01  |
| CCNA_02313 | 3.11407E-05 | 9.29123E-05 | -1.5770E+00 | -8.7343E-01 |
| CCNA_02314 | 1.71378E-04 | 7.38270E-05 | 1.2148E+00  | 7.1872E-01  |
| CCNA_02315 | 6.43701E-05 | 8.43115E-05 | -3.8940E-01 | -1.9614E-01 |
| CCNA_02316 | 3.10565E-05 | 1.82597E-05 | 7.6577E-01  | 4.6263E-01  |
| CCNA_02317 | 2.98135E-05 | 1.14039E-04 | -1.9354E+00 | -1.0778E+00 |
| CCNA_02318 | 2.47985E-04 | 5.83441E-05 | 2.0874E+00  | 1.2163E+00  |
| CCNA_02319 | 5.64307E-05 | 4.88653E-05 | 2.0753E-01  | 1.4427E-01  |
| CCNA_02320 | 1.04630E-04 | 7.17406E-05 | 5.4433E-01  | 3.3634E-01  |
| CCNA_02321 | 1.52405E-04 | 1.17349E-04 | 3.7705E-01  | 2.4094E-01  |
| CCNA_02322 | 1.46900E-05 | 1.35954E-04 | -3.2100E+00 | -1.8047E+00 |
| CCNA_02323 | 1.29652E-04 | 1.42708E-04 | -1.3846E-01 | -5.3041E-02 |
| CCNA_02324 | 3.92135E-04 | 5.03663E-05 | 2.9606E+00  | 1.7143E+00  |
| CCNA_02325 | 2.09308E-04 | 4.87752E-05 | 2.1012E+00  | 1.2242E+00  |
| CCNA_02326 | 5.64819E-05 | 2.91345E-05 | 9.5476E-01  | 5.7040E-01  |
| CCNA_02327 | 2.73739E-04 | 1.35346E-04 | 1.0161E+00  | 6.0537E-01  |
| CCNA_02328 | 2.75719E-04 | 1.29822E-04 | 1.0866E+00  | 6.4558E-01  |
| CCNA_02329 | 1.20193E-04 | 1.29132E-04 | -1.0354E-01 | -3.3123E-02 |
| CCNA_02330 | 1.26555E-05 | 1.10024E-04 | -3.1197E+00 | -1.7532E+00 |

|            |             |             |             |             |
|------------|-------------|-------------|-------------|-------------|
| CCNA_02331 | 1.30949E-05 | 3.62118E-05 | -1.4674E+00 | -8.1091E-01 |
| CCNA_02332 | 8.30209E-05 | 1.44104E-04 | -7.9559E-01 | -4.2778E-01 |
| CCNA_02333 | 2.15279E-04 | 7.79548E-05 | 1.4654E+00  | 8.6160E-01  |
| CCNA_02334 | 2.07063E-04 | 6.81232E-05 | 1.6037E+00  | 9.4048E-01  |
| CCNA_02335 | 1.54307E-04 | 8.17899E-05 | 9.1571E-01  | 5.4813E-01  |
| CCNA_02336 | 1.69054E-04 | 5.95299E-05 | 1.5056E+00  | 8.8456E-01  |
| CCNA_02337 | 1.13388E-04 | 1.47099E-04 | -3.7555E-01 | -1.8825E-01 |
| CCNA_02338 | 9.21461E-05 | 5.06139E-05 | 8.6422E-01  | 5.1877E-01  |
| CCNA_02339 | 1.46467E-04 | 1.41155E-04 | 5.3252E-02  | 5.6291E-02  |
| CCNA_02340 | 1.66583E-04 | 1.04898E-04 | 6.6718E-01  | 4.0640E-01  |
| CCNA_02341 | 1.73755E-04 | 9.74228E-05 | 8.3464E-01  | 5.0190E-01  |
| CCNA_02342 | 2.61595E-04 | 6.30123E-05 | 2.0535E+00  | 1.1970E+00  |
| CCNA_02343 | 1.90119E-04 | 5.12294E-05 | 1.8917E+00  | 1.1047E+00  |
| CCNA_02344 | 3.59739E-04 | 7.88704E-05 | 2.1893E+00  | 1.2744E+00  |
| CCNA_02345 | 2.40205E-04 | 5.49444E-05 | 2.1280E+00  | 1.2395E+00  |
| CCNA_02346 | 5.59248E-04 | 1.46648E-04 | 1.9311E+00  | 1.1272E+00  |
| CCNA_02347 | 8.35957E-05 | 5.36985E-05 | 6.3840E-01  | 3.8999E-01  |
| CCNA_02348 | 1.90901E-05 | 1.14767E-04 | -2.5877E+00 | -1.4498E+00 |
| CCNA_02349 | 1.58608E-04 | 1.10189E-04 | 5.2541E-01  | 3.2555E-01  |
| CCNA_02350 | 9.13786E-05 | 4.51728E-05 | 1.0162E+00  | 6.0544E-01  |
| CCNA_02351 | 2.99128E-05 | 1.40164E-04 | -2.2282E+00 | -1.2448E+00 |
| CCNA_02352 | 3.39487E-05 | 5.99877E-05 | -8.2136E-01 | -4.4248E-01 |
| CCNA_02353 | 1.57425E-04 | 1.44307E-04 | 1.2548E-01  | 9.7480E-02  |
| CCNA_02354 | 2.20953E-04 | 6.18565E-05 | 1.8366E+00  | 1.0733E+00  |
| CCNA_02355 | 1.03706E-04 | 7.70242E-05 | 4.2902E-01  | 2.7058E-01  |
| CCNA_02356 | 1.47511E-04 | 8.04390E-05 | 8.7475E-01  | 5.2478E-01  |
| CCNA_02357 | 4.29746E-05 | 6.74327E-05 | -6.5002E-01 | -3.4477E-01 |
| CCNA_02358 | 1.76485E-05 | 6.77930E-05 | -1.9415E+00 | -1.0813E+00 |
| CCNA_02359 | 1.80699E-05 | 1.25754E-04 | -2.7988E+00 | -1.5702E+00 |
| CCNA_02360 | 1.38597E-04 | 1.14527E-04 | 2.7515E-01  | 1.8283E-01  |
| CCNA_02361 | 3.06237E-04 | 1.46776E-04 | 1.0610E+00  | 6.3097E-01  |
| CCNA_02362 | 1.85902E-04 | 1.47099E-04 | 3.3771E-01  | 2.1851E-01  |
| CCNA_02363 | 1.82851E-04 | 1.47099E-04 | 3.1383E-01  | 2.0489E-01  |
| CCNA_02364 | 2.30641E-04 | 8.88296E-05 | 1.3764E+00  | 8.1087E-01  |
| CCNA_02365 | 2.30087E-05 | 3.70298E-05 | -6.8661E-01 | -3.6564E-01 |
| CCNA_02366 | 8.72313E-05 | 1.37822E-04 | -6.5992E-01 | -3.5042E-01 |
| CCNA_02367 | 1.27609E-04 | 1.27428E-04 | 1.9933E-03  | 2.7059E-02  |
| CCNA_02368 | 6.93180E-05 | 4.13227E-05 | 7.4610E-01  | 4.5140E-01  |
| CCNA_02369 | 2.95697E-05 | 9.39180E-05 | -1.6673E+00 | -9.2487E-01 |
| CCNA_02370 | 3.71871E-05 | 7.42173E-05 | -9.9698E-01 | -5.4263E-01 |
| CCNA_02371 | 2.16255E-04 | 4.42722E-05 | 2.2880E+00  | 1.3307E+00  |
| CCNA_02372 | 1.01666E-05 | 0.00000E+00 | 1.0404E+01  | 5.9592E+00  |
| CCNA_02373 | 1.49459E-05 | 0.00000E+00 | 1.0960E+01  | 6.2761E+00  |
| CCNA_02374 | 1.15603E-04 | 4.99610E-05 | 1.2101E+00  | 7.1603E-01  |
| CCNA_02375 | 1.52125E-04 | 1.30685E-04 | 2.1911E-01  | 1.5088E-01  |
| CCNA_02376 | 1.62493E-04 | 9.01805E-05 | 8.4940E-01  | 5.1032E-01  |
| CCNA_02377 | 1.59715E-04 | 1.44930E-04 | 1.4010E-01  | 1.0582E-01  |
| CCNA_02378 | 1.18276E-04 | 9.63121E-05 | 2.9629E-01  | 1.9489E-01  |
| CCNA_02379 | 6.86017E-05 | 4.99460E-05 | 4.5772E-01  | 2.8695E-01  |
| CCNA_02380 | 1.71962E-04 | 1.34858E-04 | 3.5059E-01  | 2.2586E-01  |
| CCNA_02381 | 1.78499E-04 | 1.47129E-04 | 2.7879E-01  | 1.8491E-01  |
| CCNA_02382 | 1.27542E-04 | 1.44277E-04 | -1.7790E-01 | -7.5531E-02 |
| CCNA_02383 | 1.10634E-04 | 1.19465E-04 | -1.1084E-01 | -3.7288E-02 |

|            |             |             |             |             |
|------------|-------------|-------------|-------------|-------------|
| CCNA_02384 | 1.64603E-04 | 1.50221E-04 | 1.3186E-01  | 1.0112E-01  |
| CCNA_02385 | 3.49569E-05 | 3.22641E-05 | 1.1544E-01  | 9.1753E-02  |
| CCNA_02386 | 3.56094E-04 | 5.74510E-05 | 2.6317E+00  | 1.5267E+00  |
| CCNA_02387 | 1.69623E-05 | 1.42273E-04 | -3.0681E+00 | -1.7237E+00 |
| CCNA_02388 | 6.54897E-05 | 1.47099E-04 | -1.1675E+00 | -6.3985E-01 |
| CCNA_02389 | 4.59584E-04 | 1.09911E-04 | 2.0639E+00  | 1.2029E+00  |
| CCNA_02390 | 4.19161E-04 | 1.47429E-04 | 1.5074E+00  | 8.8557E-01  |
| CCNA_02391 | 2.25934E-05 | 3.77578E-05 | -7.4097E-01 | -3.9664E-01 |
| CCNA_02392 | 1.18884E-04 | 7.34968E-05 | 6.9369E-01  | 4.2152E-01  |
| CCNA_04015 | 3.56130E-04 | 1.03577E-04 | 1.7816E+00  | 1.0419E+00  |
| CCNA_02394 | 2.42622E-04 | 8.52046E-05 | 1.5096E+00  | 8.8681E-01  |
| CCNA_02395 | 2.61342E-04 | 6.85660E-05 | 1.9302E+00  | 1.1267E+00  |
| CCNA_02396 | 1.77653E-04 | 1.40209E-04 | 3.4143E-01  | 2.2063E-01  |
| CCNA_02397 | 1.74252E-04 | 7.17181E-05 | 1.2806E+00  | 7.5624E-01  |
| CCNA_02398 | 5.36128E-04 | 5.40588E-05 | 3.3098E+00  | 1.9134E+00  |
| CCNA_02399 | 3.86708E-05 | 1.09431E-04 | -1.5007E+00 | -8.2989E-01 |
| CCNA_02400 | 1.40165E-04 | 9.70476E-05 | 5.3028E-01  | 3.2833E-01  |
| CCNA_02401 | 1.37492E-04 | 8.64505E-05 | 6.6931E-01  | 4.0762E-01  |
| CCNA_02402 | 3.07293E-04 | 3.74126E-05 | 3.0377E+00  | 1.7583E+00  |
| CCNA_02403 | 5.11578E-04 | 9.79032E-05 | 2.3854E+00  | 1.3863E+00  |
| CCNA_02404 | 1.31482E-04 | 1.46528E-04 | -1.5635E-01 | -6.3243E-02 |
| CCNA_02405 | 2.05950E-05 | 9.05332E-05 | -2.1361E+00 | -1.1922E+00 |
| CCNA_02406 | 1.34615E-04 | 1.18857E-04 | 1.7955E-01  | 1.2832E-01  |
| CCNA_02407 | 2.97154E-04 | 6.57141E-05 | 2.1768E+00  | 1.2673E+00  |
| CCNA_02408 | 1.99692E-04 | 4.35967E-05 | 2.1953E+00  | 1.2778E+00  |
| CCNA_02409 | 2.10000E-04 | 7.03222E-05 | 1.5782E+00  | 9.2594E-01  |
| CCNA_02410 | 9.36720E-05 | 4.67639E-05 | 1.0020E+00  | 5.9736E-01  |
| CCNA_02411 | 5.51907E-04 | 1.46378E-04 | 1.9147E+00  | 1.1178E+00  |
| CCNA_02412 | 5.62276E-04 | 1.45560E-04 | 1.9496E+00  | 1.1377E+00  |
| CCNA_02413 | 1.35042E-04 | 7.75720E-05 | 7.9970E-01  | 4.8197E-01  |
| CCNA_02414 | 9.90683E-05 | 1.36111E-04 | -4.5833E-01 | -2.3545E-01 |
| CCNA_02415 | 1.13238E-04 | 1.40915E-04 | -3.1551E-01 | -1.5400E-01 |
| CCNA_02416 | 5.14841E-04 | 1.38738E-04 | 1.8917E+00  | 1.1047E+00  |
| CCNA_02417 | 7.86358E-05 | 1.03697E-04 | -3.9917E-01 | -2.0171E-01 |
| CCNA_02418 | 1.96981E-04 | 1.47099E-04 | 4.2122E-01  | 2.6613E-01  |
| CCNA_02419 | 2.05649E-05 | 1.47099E-04 | -2.8384E+00 | -1.5927E+00 |
| CCNA_02420 | 6.09271E-05 | 1.47309E-04 | -1.2737E+00 | -7.0043E-01 |
| CCNA_02421 | 7.06813E-05 | 6.55640E-05 | 1.0832E-01  | 8.7696E-02  |
| CCNA_02422 | 1.84551E-05 | 1.27616E-04 | -2.7896E+00 | -1.5649E+00 |
| CCNA_02423 | 1.92075E-05 | 6.01303E-05 | -1.6464E+00 | -9.1297E-01 |
| CCNA_02424 | 2.05618E-05 | 6.33500E-05 | -1.6233E+00 | -8.9983E-01 |
| CCNA_02425 | 3.53395E-04 | 6.46108E-05 | 2.4513E+00  | 1.4238E+00  |
| CCNA_02426 | 2.59924E-04 | 5.49293E-05 | 2.2423E+00  | 1.3046E+00  |
| CCNA_02427 | 2.37292E-04 | 8.81016E-05 | 1.4293E+00  | 8.4103E-01  |
| CCNA_02428 | 3.76349E-04 | 8.58276E-05 | 2.1324E+00  | 1.2420E+00  |
| CCNA_02429 | 1.87771E-04 | 8.86720E-05 | 1.0823E+00  | 6.4315E-01  |
| CCNA_02430 | 8.41555E-05 | 4.65087E-05 | 8.5538E-01  | 5.1372E-01  |
| CCNA_02431 | 5.29937E-05 | 5.79989E-05 | -1.3031E-01 | -4.8390E-02 |
| CCNA_02432 | 9.27330E-05 | 1.17161E-04 | -3.3738E-01 | -1.6648E-01 |
| CCNA_02433 | 1.35172E-04 | 8.87695E-05 | 6.0657E-01  | 3.7183E-01  |
| CCNA_02434 | 4.01576E-05 | 4.50302E-05 | -1.6535E-01 | -6.8374E-02 |
| CCNA_02435 | 2.07891E-04 | 5.43364E-05 | 1.9357E+00  | 1.1298E+00  |
| CCNA_02436 | 2.85446E-04 | 5.81190E-05 | 2.2960E+00  | 1.3353E+00  |

|            |             |             |             |             |
|------------|-------------|-------------|-------------|-------------|
| CCNA_02437 | 1.98019E-04 | 9.65372E-05 | 1.0364E+00  | 6.1695E-01  |
| CCNA_02438 | 2.42101E-04 | 1.27023E-04 | 9.3046E-01  | 5.5654E-01  |
| CCNA_02439 | 1.04744E-04 | 1.12718E-04 | -1.0590E-01 | -3.4470E-02 |
| CCNA_02440 | 3.95740E-04 | 5.04488E-05 | 2.9715E+00  | 1.7205E+00  |
| CCNA_02441 | 3.45759E-04 | 6.78605E-05 | 2.3490E+00  | 1.3655E+00  |
| CCNA_02442 | 7.11659E-05 | 1.45973E-04 | -1.0365E+00 | -5.6514E-01 |
| CCNA_02443 | 8.64850E-05 | 9.22294E-05 | -9.2844E-02 | -2.7024E-02 |
| CCNA_02444 | 2.87860E-04 | 8.44541E-05 | 1.7690E+00  | 1.0348E+00  |
| CCNA_02445 | 2.88790E-04 | 1.02977E-04 | 1.4876E+00  | 8.7428E-01  |
| CCNA_02446 | 1.83772E-04 | 6.36802E-05 | 1.5288E+00  | 8.9779E-01  |
| CCNA_02447 | 4.32936E-04 | 1.35789E-04 | 1.6727E+00  | 9.7984E-01  |
| CCNA_02448 | 2.28350E-04 | 1.40682E-04 | 6.9875E-01  | 4.2441E-01  |
| CCNA_02449 | 3.81122E-04 | 7.70842E-05 | 2.3056E+00  | 1.3408E+00  |
| CCNA_02450 | 3.73990E-04 | 9.60119E-05 | 1.9616E+00  | 1.1446E+00  |
| CCNA_02451 | 4.92708E-05 | 1.47271E-04 | -1.5797E+00 | -8.7492E-01 |
| CCNA_02452 | 5.52389E-05 | 1.13844E-04 | -1.0433E+00 | -5.6906E-01 |
| CCNA_02453 | 5.69514E-05 | 1.36532E-04 | -1.2614E+00 | -6.9345E-01 |
| CCNA_02454 | 7.59482E-05 | 7.93582E-05 | -6.3443E-02 | -1.0258E-02 |
| CCNA_02455 | 3.03853E-05 | 6.56315E-05 | -1.1110E+00 | -6.0768E-01 |
| CCNA_02456 | 4.03562E-05 | 1.15578E-04 | -1.5180E+00 | -8.3975E-01 |
| CCNA_02457 | 4.19423E-05 | 1.47099E-04 | -1.8103E+00 | -1.0064E+00 |
| CCNA_02458 | 4.13193E-05 | 1.43796E-04 | -1.7991E+00 | -1.0001E+00 |
| CCNA_02459 | 1.28141E-04 | 1.39076E-04 | -1.1818E-01 | -4.1472E-02 |
| CCNA_02460 | 2.03424E-04 | 8.39963E-05 | 1.2760E+00  | 7.5359E-01  |
| CCNA_02461 | 1.08512E-04 | 1.35233E-04 | -3.1763E-01 | -1.5521E-01 |
| CCNA_02462 | 4.91712E-04 | 1.02376E-04 | 2.2638E+00  | 1.3169E+00  |
| CCNA_02463 | 2.59521E-05 | 1.40854E-04 | -2.4402E+00 | -1.3657E+00 |
| CCNA_02464 | 2.57637E-04 | 6.26445E-05 | 2.0399E+00  | 1.1892E+00  |
| CCNA_02465 | 3.60392E-04 | 1.33822E-04 | 1.4292E+00  | 8.4095E-01  |
| CCNA_02466 | 4.37150E-05 | 4.79572E-05 | -1.3374E-01 | -5.0349E-02 |
| CCNA_02467 | 1.02397E-04 | 9.17791E-05 | 1.5786E-01  | 1.1595E-01  |
| CCNA_02468 | 1.53359E-04 | 1.08876E-04 | 4.9416E-01  | 3.0773E-01  |
| CCNA_02469 | 1.51445E-04 | 1.46213E-04 | 5.0676E-02  | 5.4822E-02  |
| CCNA_02470 | 1.81370E-04 | 7.96359E-05 | 1.1873E+00  | 7.0303E-01  |
| CCNA_02471 | 3.44420E-04 | 1.21169E-04 | 1.5071E+00  | 8.8537E-01  |
| CCNA_02472 | 1.94152E-04 | 7.46075E-05 | 1.3797E+00  | 8.1272E-01  |
| CCNA_02473 | 1.96981E-05 | 1.40457E-04 | -2.8339E+00 | -1.5902E+00 |
| CCNA_02474 | 2.16784E-05 | 1.02736E-04 | -2.2445E+00 | -1.2541E+00 |
| CCNA_02475 | 2.70121E-04 | 1.47099E-04 | 8.7676E-01  | 5.2592E-01  |
| CCNA_02476 | 3.08948E-04 | 1.46986E-04 | 1.0716E+00  | 6.3705E-01  |
| CCNA_02477 | 4.61648E-05 | 5.53796E-05 | -2.6266E-01 | -1.2387E-01 |
| CCNA_02478 | 1.66553E-05 | 1.33732E-04 | -3.0051E+00 | -1.6878E+00 |
| CCNA_02479 | 2.44112E-05 | 1.14752E-04 | -2.2328E+00 | -1.2474E+00 |
| CCNA_02480 | 3.25703E-05 | 1.47099E-04 | -2.1751E+00 | -1.2145E+00 |
| CCNA_02481 | 1.93339E-05 | 6.08133E-05 | -1.6532E+00 | -9.1686E-01 |
| CCNA_02482 | 1.03911E-04 | 1.26325E-04 | -2.8184E-01 | -1.3480E-01 |
| CCNA_02483 | 2.22111E-05 | 7.44049E-05 | -1.7441E+00 | -9.6868E-01 |
| CCNA_02484 | 5.43661E-05 | 1.26745E-04 | -1.2212E+00 | -6.7047E-01 |
| CCNA_02485 | 3.85866E-05 | 6.15263E-05 | -6.7317E-01 | -3.5797E-01 |
| CCNA_02486 | 2.51756E-05 | 1.00537E-04 | -1.9976E+00 | -1.1132E+00 |
| CCNA_02487 | 2.37430E-05 | 1.41725E-04 | -2.5774E+00 | -1.4439E+00 |
| CCNA_02488 | 2.29936E-05 | 1.01948E-04 | -2.1484E+00 | -1.1993E+00 |
| CCNA_02489 | 2.97111E-05 | 5.47867E-05 | -8.8287E-01 | -4.7756E-01 |

|            |             |             |             |             |
|------------|-------------|-------------|-------------|-------------|
| CCNA_02490 | 5.24610E-05 | 1.72391E-05 | 1.6050E+00  | 9.4123E-01  |
| CCNA_02491 | 9.51046E-06 | 3.30221E-07 | 4.8160E+00  | 2.7724E+00  |
| CCNA_02492 | 2.09742E-05 | 6.55189E-05 | -1.6433E+00 | -9.1119E-01 |
| CCNA_02493 | 2.24338E-05 | 4.50152E-05 | -1.0048E+00 | -5.4708E-01 |
| CCNA_02494 | 4.58910E-05 | 1.19300E-04 | -1.3783E+00 | -7.6010E-01 |
| CCNA_02495 | 2.16905E-05 | 1.21334E-04 | -2.4837E+00 | -1.3905E+00 |
| CCNA_02496 | 5.99881E-05 | 8.82442E-05 | -5.5688E-01 | -2.9165E-01 |
| CCNA_02497 | 1.67613E-04 | 8.89797E-05 | 9.1349E-01  | 5.4686E-01  |
| CCNA_02498 | 1.72853E-04 | 1.06151E-04 | 7.0334E-01  | 4.2702E-01  |
| CCNA_02499 | 7.58489E-05 | 1.08958E-04 | -5.2262E-01 | -2.7211E-01 |
| CCNA_02500 | 1.78140E-05 | 7.06074E-05 | -1.9867E+00 | -1.1071E+00 |
| CCNA_02501 | 2.59250E-05 | 9.95543E-05 | -1.9411E+00 | -1.0810E+00 |
| CCNA_02502 | 2.35444E-05 | 5.01561E-05 | -1.0911E+00 | -5.9629E-01 |
| CCNA_02503 | 2.72914E-05 | 5.13494E-05 | -9.1195E-01 | -4.9414E-01 |
| CCNA_02504 | 1.00079E-04 | 4.67413E-05 | 1.0982E+00  | 6.5219E-01  |
| CCNA_02505 | 4.20868E-05 | 7.73319E-05 | -8.7773E-01 | -4.7463E-01 |
| CCNA_02506 | 3.80858E-04 | 1.11833E-04 | 1.7678E+00  | 1.0341E+00  |
| CCNA_02507 | 2.22439E-04 | 3.75477E-05 | 2.5663E+00  | 1.4895E+00  |
| CCNA_02508 | 6.36237E-05 | 1.35789E-04 | -1.0937E+00 | -5.9781E-01 |
| CCNA_02509 | 8.87633E-05 | 6.65321E-05 | 4.1580E-01  | 2.6304E-01  |
| CCNA_02510 | 3.07826E-05 | 1.39609E-04 | -2.1811E+00 | -1.2179E+00 |
| CCNA_02511 | 3.12400E-05 | 9.21168E-05 | -1.5600E+00 | -8.6374E-01 |
| CCNA_02512 | 2.54197E-04 | 1.30085E-04 | 9.6643E-01  | 5.7706E-01  |
| CCNA_02513 | 2.26084E-04 | 5.03738E-05 | 2.1659E+00  | 1.2611E+00  |
| CCNA_02514 | 3.14664E-04 | 1.13866E-04 | 1.4664E+00  | 8.6217E-01  |
| CCNA_02515 | 1.38194E-04 | 9.96894E-05 | 4.7110E-01  | 2.9458E-01  |
| CCNA_02516 | 5.25934E-05 | 6.58041E-05 | -3.2338E-01 | -1.5849E-01 |
| CCNA_02517 | 6.84632E-05 | 4.09775E-05 | 7.4030E-01  | 4.4810E-01  |
| CCNA_02518 | 2.07274E-05 | 7.02621E-05 | -1.7612E+00 | -9.7842E-01 |
| CCNA_02519 | 3.57816E-05 | 9.80533E-05 | -1.4543E+00 | -8.0345E-01 |
| CCNA_02520 | 2.02278E-05 | 6.23818E-05 | -1.6247E+00 | -9.0063E-01 |
| CCNA_02521 | 2.04415E-05 | 5.49969E-05 | -1.4278E+00 | -7.8834E-01 |
| CCNA_02522 | 1.84882E-05 | 5.99127E-05 | -1.6962E+00 | -9.4138E-01 |
| CCNA_02523 | 3.10640E-04 | 3.08457E-05 | 3.3318E+00  | 1.9260E+00  |
| CCNA_04001 | 4.31793E-05 | 1.26527E-04 | -1.5510E+00 | -8.5859E-01 |
| CCNA_02525 | 3.07404E-05 | 7.33542E-05 | -1.2547E+00 | -6.8963E-01 |
| CCNA_02526 | 1.56312E-04 | 1.30663E-04 | 2.5852E-01  | 1.7335E-01  |
| CCNA_02527 | 1.77719E-05 | 1.06129E-04 | -2.5780E+00 | -1.4443E+00 |
| CCNA_02528 | 1.87209E-04 | 1.34895E-04 | 4.7275E-01  | 2.9552E-01  |
| CCNA_02529 | 4.17617E-05 | 1.02564E-04 | -1.2963E+00 | -7.1331E-01 |
| CCNA_02530 | 1.50049E-04 | 1.00928E-04 | 5.7203E-01  | 3.5214E-01  |
| CCNA_02531 | 9.12823E-05 | 4.18631E-05 | 1.1244E+00  | 6.6717E-01  |
| CCNA_02532 | 5.83840E-05 | 1.19510E-04 | -1.0335E+00 | -5.6346E-01 |
| CCNA_02533 | 8.91726E-05 | 4.46625E-05 | 9.9734E-01  | 5.9469E-01  |
| CCNA_02534 | 1.59983E-04 | 6.75078E-05 | 1.2447E+00  | 7.3573E-01  |
| CCNA_02535 | 1.53720E-04 | 6.38078E-05 | 1.2684E+00  | 7.4924E-01  |
| CCNA_04018 | 1.56862E-05 | 1.23495E-04 | -2.9767E+00 | -1.6716E+00 |
| CCNA_02537 | 8.39990E-05 | 8.82817E-05 | -7.1813E-02 | -1.5031E-02 |
| CCNA_02538 | 1.56435E-04 | 8.60377E-05 | 8.6242E-01  | 5.1774E-01  |
| CCNA_02539 | 2.16444E-04 | 7.40597E-05 | 1.5471E+00  | 9.0820E-01  |
| CCNA_02540 | 4.73898E-05 | 8.50470E-05 | -8.4372E-01 | -4.5523E-01 |
| CCNA_02541 | 4.74319E-05 | 8.61728E-05 | -8.6141E-01 | -4.6532E-01 |
| CCNA_02542 | 1.40397E-04 | 1.47099E-04 | -6.7319E-02 | -1.2468E-02 |



|            |             |             |             |             |
|------------|-------------|-------------|-------------|-------------|
| CCNA_02543 | 3.28138E-04 | 1.40262E-04 | 1.2261E+00  | 7.2515E-01  |
| CCNA_02544 | 4.35495E-05 | 1.47954E-04 | -1.7644E+00 | -9.8027E-01 |
| CCNA_02545 | 4.65109E-05 | 9.95167E-05 | -1.0974E+00 | -5.9989E-01 |
| CCNA_02546 | 2.71906E-04 | 1.19870E-04 | 1.1816E+00  | 6.9974E-01  |
| CCNA_02547 | 2.10046E-04 | 1.42295E-04 | 5.6176E-01  | 3.4628E-01  |
| CCNA_02548 | 3.03715E-04 | 1.02504E-04 | 1.5669E+00  | 9.1952E-01  |
| CCNA_02549 | 1.96797E-04 | 1.28081E-04 | 6.1959E-01  | 3.7926E-01  |
| CCNA_02550 | 1.70586E-05 | 1.20141E-04 | -2.8160E+00 | -1.5800E+00 |
| CCNA_02551 | 2.59732E-05 | 1.18542E-04 | -2.1902E+00 | -1.2231E+00 |
| CCNA_02552 | 1.04639E-04 | 6.08358E-05 | 7.8229E-01  | 4.7205E-01  |
| CCNA_02553 | 5.19310E-04 | 1.47099E-04 | 1.8197E+00  | 1.0637E+00  |
| CCNA_02554 | 1.11128E-04 | 6.60968E-05 | 7.4944E-01  | 4.5331E-01  |
| CCNA_02555 | 2.87270E-05 | 1.17018E-04 | -2.0262E+00 | -1.1296E+00 |
| CCNA_02556 | 2.67647E-05 | 1.47099E-04 | -2.4583E+00 | -1.3760E+00 |
| CCNA_02557 | 1.19374E-04 | 1.33725E-04 | -1.6382E-01 | -6.7500E-02 |
| CCNA_02558 | 9.35847E-05 | 1.31443E-04 | -4.9013E-01 | -2.5359E-01 |
| CCNA_02559 | 2.39206E-05 | 4.47300E-06 | 2.4167E+00  | 1.4041E+00  |
| CCNA_02560 | 3.77890E-05 | 2.80313E-05 | 4.3066E-01  | 2.7152E-01  |
| CCNA_02561 | 3.87912E-05 | 8.54673E-05 | -1.1397E+00 | -6.2400E-01 |
| CCNA_02562 | 4.25436E-04 | 7.10126E-05 | 2.5827E+00  | 1.4988E+00  |
| CCNA_02563 | 1.70508E-04 | 6.81757E-05 | 1.3224E+00  | 7.8004E-01  |
| CCNA_02564 | 5.49379E-05 | 8.37562E-05 | -6.0844E-01 | -3.2106E-01 |
| CCNA_02565 | 4.23998E-05 | 8.58576E-05 | -1.0179E+00 | -5.5457E-01 |
| CCNA_02566 | 1.14065E-04 | 4.89328E-05 | 1.2208E+00  | 7.2212E-01  |
| CCNA_02567 | 5.38885E-04 | 1.30618E-04 | 2.0446E+00  | 1.1919E+00  |
| CCNA_02568 | 9.32597E-05 | 1.42566E-04 | -6.1233E-01 | -3.2328E-01 |
| CCNA_02569 | 2.79653E-04 | 8.87996E-05 | 1.6549E+00  | 9.6968E-01  |
| CCNA_02570 | 2.98827E-04 | 1.18625E-04 | 1.3328E+00  | 7.8601E-01  |
| CCNA_02571 | 8.16786E-05 | 2.83315E-05 | 1.5272E+00  | 8.9686E-01  |
| CCNA_02572 | 2.37217E-04 | 1.27608E-04 | 8.9442E-01  | 5.3599E-01  |
| CCNA_02573 | 2.72162E-05 | 8.33659E-05 | -1.6150E+00 | -8.9506E-01 |
| CCNA_02574 | 3.02890E-05 | 4.18406E-05 | -4.6622E-01 | -2.3995E-01 |
| CCNA_02575 | 2.65369E-04 | 1.38003E-04 | 9.4324E-01  | 5.6383E-01  |
| CCNA_02576 | 3.87057E-04 | 5.35184E-05 | 2.8543E+00  | 1.6536E+00  |
| CCNA_02577 | 2.34722E-05 | 1.30310E-04 | -2.4728E+00 | -1.3843E+00 |
| CCNA_02578 | 5.55368E-05 | 1.27135E-04 | -1.1949E+00 | -6.5548E-01 |
| CCNA_02579 | 4.97012E-05 | 1.24869E-04 | -1.3291E+00 | -7.3201E-01 |
| CCNA_02580 | 8.10676E-05 | 1.44847E-04 | -8.3735E-01 | -4.5160E-01 |
| CCNA_02581 | 1.49248E-05 | 1.39616E-04 | -3.2255E+00 | -1.8135E+00 |
| CCNA_02582 | 1.42235E-05 | 5.27604E-05 | -1.8911E+00 | -1.0525E+00 |
| CCNA_02583 | 1.70917E-05 | 1.44157E-04 | -3.0761E+00 | -1.7283E+00 |
| CCNA_04012 | 1.12013E-04 | 9.06383E-05 | 3.0539E-01  | 2.0008E-01  |
| CCNA_02585 | 1.46500E-04 | 1.42776E-04 | 3.7105E-02  | 4.7082E-02  |
| CCNA_02586 | 1.54722E-04 | 7.43073E-05 | 1.0580E+00  | 6.2927E-01  |
| CCNA_02587 | 2.04478E-04 | 1.47099E-04 | 4.7511E-01  | 2.9687E-01  |
| CCNA_02588 | 5.71753E-04 | 3.29171E-05 | 4.1182E+00  | 2.3744E+00  |
| CCNA_02589 | 5.40459E-04 | 4.18931E-05 | 3.6891E+00  | 2.1298E+00  |
| CCNA_02590 | 4.48990E-04 | 9.59519E-05 | 2.2262E+00  | 1.2955E+00  |
| CCNA_02591 | 2.22894E-05 | 9.47510E-05 | -2.0877E+00 | -1.1646E+00 |
| CCNA_02592 | 2.05348E-05 | 1.45448E-04 | -2.8242E+00 | -1.5847E+00 |
| CCNA_02593 | 1.58981E-04 | 1.40044E-04 | 1.8293E-01  | 1.3024E-01  |
| CCNA_02594 | 5.92417E-05 | 8.42815E-05 | -5.0866E-01 | -2.6415E-01 |
| CCNA_02595 | 2.21148E-05 | 9.90139E-05 | -2.1625E+00 | -1.2073E+00 |

|            |             |             |             |             |
|------------|-------------|-------------|-------------|-------------|
| CCNA_02596 | 2.13118E-04 | 7.57858E-05 | 1.4915E+00  | 8.7651E-01  |
| CCNA_02597 | 2.50101E-05 | 6.53688E-05 | -1.3861E+00 | -7.6453E-01 |
| CCNA_02598 | 2.84260E-05 | 1.02391E-04 | -1.8488E+00 | -1.0284E+00 |
| CCNA_02599 | 4.08197E-05 | 6.90463E-05 | -7.5835E-01 | -4.0655E-01 |
| CCNA_02600 | 2.30653E-04 | 1.07127E-04 | 1.1063E+00  | 6.5683E-01  |
| CCNA_02601 | 2.40440E-05 | 1.44660E-04 | -2.5888E+00 | -1.4504E+00 |
| CCNA_02602 | 2.44082E-05 | 1.21544E-04 | -2.3160E+00 | -1.2948E+00 |
| CCNA_02603 | 2.75562E-05 | 5.13344E-05 | -8.9760E-01 | -4.8596E-01 |
| CCNA_02604 | 7.12953E-05 | 1.27526E-04 | -8.3893E-01 | -4.5250E-01 |
| CCNA_02605 | 1.71399E-05 | 1.04643E-04 | -2.6099E+00 | -1.4624E+00 |
| CCNA_02606 | 6.58990E-05 | 7.46601E-05 | -1.8016E-01 | -7.6818E-02 |
| CCNA_02607 | 5.72222E-05 | 5.20624E-05 | 1.3620E-01  | 1.0360E-01  |
| CCNA_02608 | 1.52751E-04 | 1.36291E-04 | 1.6444E-01  | 1.1970E-01  |
| CCNA_02609 | 5.92417E-05 | 1.45898E-04 | -1.3003E+00 | -7.1559E-01 |
| CCNA_02610 | 5.72674E-05 | 8.42515E-05 | -5.5704E-01 | -2.9175E-01 |
| CCNA_02611 | 1.36267E-04 | 9.95543E-05 | 4.5281E-01  | 2.8415E-01  |
| CCNA_02612 | 1.25330E-04 | 5.59425E-05 | 1.1636E+00  | 6.8947E-01  |
| CCNA_02613 | 1.94994E-05 | 9.59293E-05 | -2.2984E+00 | -1.2848E+00 |
| CCNA_02614 | 1.10120E-04 | 1.31751E-04 | -2.5878E-01 | -1.2166E-01 |
| CCNA_02615 | 4.23426E-05 | 1.43421E-04 | -1.7600E+00 | -9.7779E-01 |
| CCNA_02616 | 4.39046E-05 | 8.68032E-05 | -9.8340E-01 | -5.3489E-01 |
| CCNA_02617 | 2.98707E-05 | 1.34993E-04 | -2.1760E+00 | -1.2150E+00 |
| CCNA_02618 | 1.29797E-04 | 1.36014E-04 | -6.7545E-02 | -1.2597E-02 |
| CCNA_02619 | 1.30955E-04 | 1.47054E-04 | -1.6731E-01 | -6.9489E-02 |
| CCNA_02620 | 1.43677E-04 | 8.01387E-05 | 8.4215E-01  | 5.0618E-01  |
| CCNA_02621 | 1.92858E-05 | 6.36127E-05 | -1.7217E+00 | -9.5594E-01 |
| CCNA_02622 | 9.70608E-05 | 8.17073E-05 | 2.4834E-01  | 1.6754E-01  |
| CCNA_02623 | 2.89828E-04 | 6.91739E-05 | 2.0668E+00  | 1.2045E+00  |
| CCNA_02624 | 5.29952E-04 | 1.28156E-04 | 2.0479E+00  | 1.1938E+00  |
| CCNA_02625 | 6.50834E-05 | 4.53304E-05 | 5.2164E-01  | 3.2340E-01  |
| CCNA_02626 | 1.08341E-04 | 1.47099E-04 | -4.4124E-01 | -2.2571E-01 |
| CCNA_02627 | 2.97313E-04 | 3.10633E-05 | 3.2584E+00  | 1.8841E+00  |
| CCNA_02628 | 9.11078E-05 | 8.67582E-05 | 7.0497E-02  | 6.6125E-02  |
| CCNA_02629 | 1.47081E-05 | 5.93423E-05 | -2.0123E+00 | -1.1217E+00 |
| CCNA_02630 | 1.75161E-05 | 5.00961E-05 | -1.5160E+00 | -8.3861E-01 |
| CCNA_02631 | 2.70193E-04 | 4.30264E-05 | 2.6505E+00  | 1.5374E+00  |
| CCNA_02632 | 1.35386E-04 | 1.12253E-04 | 2.7026E-01  | 1.8004E-01  |
| CCNA_02633 | 6.93481E-05 | 4.19757E-05 | 7.2411E-01  | 4.3886E-01  |
| CCNA_02634 | 3.87039E-05 | 7.16656E-05 | -8.8884E-01 | -4.8096E-01 |
| CCNA_02635 | 1.97450E-04 | 1.19007E-04 | 7.3037E-01  | 4.4244E-01  |
| CCNA_02636 | 2.20008E-04 | 1.29424E-04 | 7.6538E-01  | 4.6240E-01  |
| CCNA_02637 | 1.20244E-04 | 1.02421E-04 | 2.3138E-01  | 1.5787E-01  |
| CCNA_02638 | 9.82737E-05 | 1.18497E-04 | -2.7002E-01 | -1.2806E-01 |
| CCNA_02639 | 1.53061E-04 | 1.46821E-04 | 6.0005E-02  | 6.0142E-02  |
| CCNA_02640 | 9.37141E-05 | 1.43729E-04 | -6.1704E-01 | -3.2596E-01 |
| CCNA_02641 | 3.95466E-05 | 1.46491E-04 | -1.8891E+00 | -1.0514E+00 |
| CCNA_02642 | 5.68701E-05 | 1.02249E-04 | -8.4637E-01 | -4.5674E-01 |
| CCNA_02643 | 2.38484E-05 | 1.46543E-04 | -2.6193E+00 | -1.4678E+00 |
| CCNA_02644 | 6.29857E-05 | 3.78254E-05 | 7.3545E-01  | 4.4533E-01  |
| CCNA_02645 | 2.31227E-04 | 1.27308E-04 | 8.6092E-01  | 5.1689E-01  |
| CCNA_02646 | 3.91403E-05 | 4.36268E-05 | -1.5669E-01 | -6.3437E-02 |
| CCNA_02647 | 4.44433E-05 | 9.35352E-05 | -1.0736E+00 | -5.8631E-01 |
| CCNA_02648 | 2.86909E-05 | 5.34659E-05 | -8.9808E-01 | -4.8623E-01 |

|            |             |             |             |             |
|------------|-------------|-------------|-------------|-------------|
| CCNA_02649 | 4.11418E-05 | 3.60992E-05 | 1.8844E-01  | 1.3339E-01  |
| CCNA_02650 | 1.64128E-04 | 8.25854E-05 | 9.9075E-01  | 5.9093E-01  |
| CCNA_02651 | 2.90430E-05 | 1.32584E-04 | -2.1906E+00 | -1.2233E+00 |
| CCNA_02652 | 2.90340E-05 | 1.32809E-04 | -2.1935E+00 | -1.2250E+00 |
| CCNA_02653 | 2.41042E-05 | 1.33492E-04 | -2.4693E+00 | -1.3823E+00 |
| CCNA_02654 | 2.08809E-05 | 8.99403E-05 | -2.1067E+00 | -1.1755E+00 |
| CCNA_02655 | 1.60986E-05 | 1.46243E-04 | -3.1832E+00 | -1.7894E+00 |
| CCNA_02656 | 1.67246E-05 | 6.08358E-05 | -1.8629E+00 | -1.0364E+00 |
| CCNA_02657 | 2.27047E-05 | 8.66606E-05 | -1.9323E+00 | -1.0760E+00 |
| CCNA_02658 | 1.78923E-04 | 4.32815E-05 | 2.0473E+00  | 1.1934E+00  |
| CCNA_02659 | 1.87154E-04 | 4.29813E-05 | 2.1222E+00  | 1.2362E+00  |
| CCNA_02660 | 4.80639E-05 | 1.09056E-04 | -1.1820E+00 | -6.4817E-01 |
| CCNA_02661 | 5.85314E-05 | 5.20924E-05 | 1.6800E-01  | 1.2173E-01  |
| CCNA_02662 | 1.40186E-04 | 1.04815E-04 | 4.1942E-01  | 2.6511E-01  |
| CCNA_02663 | 1.20319E-04 | 1.37222E-04 | -1.8969E-01 | -8.2252E-02 |
| CCNA_02664 | 4.89798E-04 | 9.66498E-05 | 2.3412E+00  | 1.3611E+00  |
| CCNA_02665 | 4.95495E-04 | 1.11585E-04 | 2.1506E+00  | 1.2524E+00  |
| CCNA_02666 | 2.07003E-05 | 5.21675E-05 | -1.3335E+00 | -7.3454E-01 |
| CCNA_02667 | 9.19444E-05 | 1.25184E-04 | -4.4525E-01 | -2.2800E-01 |
| CCNA_02668 | 8.54436E-05 | 1.35106E-04 | -6.6107E-01 | -3.5107E-01 |
| CCNA_02669 | 1.81069E-04 | 1.47617E-04 | 2.9463E-01  | 1.9395E-01  |
| CCNA_02670 | 1.55674E-04 | 7.82775E-05 | 9.9174E-01  | 5.9149E-01  |
| CCNA_02671 | 3.59260E-05 | 1.47099E-04 | -2.0336E+00 | -1.1338E+00 |
| CCNA_02672 | 3.05870E-05 | 1.47376E-04 | -2.2684E+00 | -1.2677E+00 |
| CCNA_02673 | 3.62992E-05 | 1.46401E-04 | -2.0119E+00 | -1.1214E+00 |
| CCNA_02674 | 2.29190E-04 | 0.00000E+00 | 1.4898E+01  | 8.5221E+00  |
| CCNA_02675 | 0.00000E+00 | 0.00000E+00 | -1.3183E+00 | -7.2586E-01 |
| CCNA_02676 | 3.27957E-04 | 1.40517E-04 | 1.2227E+00  | 7.2320E-01  |
| CCNA_02677 | 3.79314E-04 | 1.23938E-04 | 1.6137E+00  | 9.4618E-01  |
| CCNA_02678 | 7.56081E-05 | 7.74144E-05 | -3.4144E-02 | 6.4512E-03  |
| CCNA_02679 | 3.14736E-04 | 1.01731E-04 | 1.6293E+00  | 9.5507E-01  |
| CCNA_02680 | 2.41012E-05 | 3.67221E-05 | -6.0766E-01 | -3.2061E-01 |
| CCNA_02681 | 2.00562E-05 | 4.93681E-05 | -1.2995E+00 | -7.1517E-01 |
| CCNA_02682 | 4.12350E-05 | 5.47417E-05 | -4.0886E-01 | -2.0724E-01 |
| CCNA_02683 | 2.39633E-04 | 9.37078E-05 | 1.3545E+00  | 7.9836E-01  |
| CCNA_02684 | 2.36229E-04 | 6.07082E-05 | 1.9601E+00  | 1.1437E+00  |
| CCNA_02685 | 1.77268E-05 | 7.36844E-05 | -2.0553E+00 | -1.1462E+00 |
| CCNA_02686 | 3.79816E-05 | 7.58909E-05 | -9.9865E-01 | -5.4359E-01 |
| CCNA_02687 | 1.53961E-04 | 9.34227E-05 | 7.2063E-01  | 4.3688E-01  |
| CCNA_02688 | 1.17105E-05 | 1.13251E-05 | 4.7695E-02  | 5.3122E-02  |
| CCNA_02689 | 2.80649E-05 | 1.03149E-04 | -1.8778E+00 | -1.0450E+00 |
| CCNA_02690 | 2.73365E-05 | 1.36059E-04 | -2.3152E+00 | -1.2944E+00 |
| CCNA_02691 | 1.71926E-04 | 8.61728E-05 | 9.9638E-01  | 5.9414E-01  |
| CCNA_02692 | 3.81080E-05 | 4.57732E-05 | -2.6453E-01 | -1.2493E-01 |
| CCNA_02693 | 4.56713E-05 | 1.28764E-04 | -1.4954E+00 | -8.2685E-01 |
| CCNA_02694 | 1.85707E-04 | 9.12837E-05 | 1.0245E+00  | 6.1017E-01  |
| CCNA_02695 | 2.00833E-04 | 1.24591E-04 | 6.8873E-01  | 4.1869E-01  |
| CCNA_02696 | 1.55767E-04 | 4.27787E-05 | 1.8642E+00  | 1.0890E+00  |
| CCNA_02697 | 1.62821E-05 | 8.43416E-05 | -2.3728E+00 | -1.3272E+00 |
| CCNA_02698 | 2.32314E-05 | 6.55940E-05 | -1.4975E+00 | -8.2805E-01 |
| CCNA_02699 | 3.63113E-05 | 1.05686E-04 | -1.5413E+00 | -8.5303E-01 |
| CCNA_02700 | 1.34982E-05 | 7.38195E-05 | -2.4511E+00 | -1.3719E+00 |
| CCNA_02701 | 1.28403E-04 | 8.81691E-05 | 5.4225E-01  | 3.3515E-01  |

|            |             |             |             |             |
|------------|-------------|-------------|-------------|-------------|
| CCNA_02702 | 2.63524E-05 | 6.03405E-05 | -1.1952E+00 | -6.5568E-01 |
| CCNA_02703 | 1.62009E-05 | 1.04065E-04 | -2.6832E+00 | -1.5042E+00 |
| CCNA_02704 | 1.67908E-05 | 5.37736E-05 | -1.6792E+00 | -9.3167E-01 |
| CCNA_02705 | 3.56793E-05 | 1.34903E-04 | -1.9187E+00 | -1.0683E+00 |
| CCNA_02706 | 1.84157E-04 | 5.95675E-05 | 1.6282E+00  | 9.5444E-01  |
| CCNA_02707 | 1.08555E-04 | 5.19649E-05 | 1.0626E+00  | 6.3192E-01  |
| CCNA_02708 | 1.10770E-04 | 7.97035E-05 | 4.7475E-01  | 2.9666E-01  |
| CCNA_02709 | 6.07255E-05 | 8.17448E-05 | -4.2889E-01 | -2.1866E-01 |
| CCNA_02710 | 1.86251E-04 | 7.46000E-05 | 1.3199E+00  | 7.7862E-01  |
| CCNA_02711 | 1.98871E-04 | 9.58468E-05 | 1.0529E+00  | 6.2639E-01  |
| CCNA_02712 | 1.19886E-04 | 1.46889E-04 | -2.9310E-01 | -1.4122E-01 |
| CCNA_02713 | 2.04956E-05 | 6.91289E-05 | -1.7539E+00 | -9.7430E-01 |
| CCNA_02714 | 1.66252E-05 | 4.62085E-05 | -1.4748E+00 | -8.1510E-01 |
| CCNA_02715 | 1.59062E-04 | 1.47099E-04 | 1.1276E-01  | 9.0228E-02  |
| CCNA_02716 | 2.75472E-05 | 6.42506E-05 | -1.2218E+00 | -6.7085E-01 |
| CCNA_02717 | 1.66072E-05 | 6.97968E-05 | -2.0712E+00 | -1.1553E+00 |
| CCNA_02718 | 9.86860E-05 | 4.99685E-05 | 9.8165E-01  | 5.8574E-01  |
| CCNA_02719 | 6.06129E-04 | 4.83099E-05 | 3.6490E+00  | 2.1069E+00  |
| CCNA_02720 | 4.63274E-05 | 7.04047E-05 | -6.0387E-01 | -3.1845E-01 |
| CCNA_02721 | 4.85840E-04 | 7.57258E-05 | 2.6815E+00  | 1.5551E+00  |
| CCNA_02722 | 9.42859E-05 | 1.10339E-04 | -2.2688E-01 | -1.0346E-01 |
| CCNA_02723 | 7.26587E-05 | 9.84811E-05 | -4.3876E-01 | -2.2429E-01 |
| CCNA_02724 | 8.03032E-05 | 1.47084E-04 | -8.7313E-01 | -4.7200E-01 |
| CCNA_02725 | 1.77779E-05 | 1.08770E-04 | -2.6130E+00 | -1.4642E+00 |
| CCNA_02726 | 4.69498E-04 | 9.52764E-05 | 2.3008E+00  | 1.3380E+00  |
| CCNA_02727 | 4.02027E-04 | 5.20549E-05 | 2.9490E+00  | 1.7077E+00  |
| CCNA_02728 | 3.89056E-05 | 1.46318E-04 | -1.9110E+00 | -1.0639E+00 |
| CCNA_02729 | 1.85905E-05 | 6.25545E-05 | -1.7505E+00 | -9.7234E-01 |
| CCNA_02730 | 1.04025E-04 | 6.41080E-05 | 6.9823E-01  | 4.2411E-01  |
| CCNA_02731 | 1.29363E-04 | 8.04840E-05 | 6.8455E-01  | 4.1631E-01  |
| CCNA_02732 | 6.78433E-05 | 6.10234E-05 | 1.5273E-01  | 1.1302E-01  |
| CCNA_02733 | 4.42056E-05 | 5.81190E-05 | -3.9487E-01 | -1.9926E-01 |
| CCNA_02734 | 2.99941E-05 | 1.10286E-04 | -1.8785E+00 | -1.0453E+00 |
| CCNA_02735 | 1.49850E-05 | 1.43391E-04 | -3.2582E+00 | -1.8321E+00 |
| CCNA_02736 | 2.79686E-05 | 8.06716E-05 | -1.5282E+00 | -8.4559E-01 |
| CCNA_02737 | 1.72663E-05 | 7.31741E-05 | -2.0833E+00 | -1.1621E+00 |
| CCNA_02738 | 1.73385E-05 | 4.27111E-05 | -1.3006E+00 | -7.1580E-01 |
| CCNA_02739 | 0.00000E+00 | 0.00000E+00 | -1.3183E+00 | -7.2586E-01 |
| CCNA_02740 | 1.93339E-05 | 1.09799E-04 | -2.5055E+00 | -1.4029E+00 |
| CCNA_02741 | 2.00683E-05 | 1.16996E-04 | -2.5433E+00 | -1.4245E+00 |
| CCNA_02742 | 3.63053E-05 | 7.34518E-05 | -1.0166E+00 | -5.5385E-01 |
| CCNA_02743 | 1.28322E-04 | 6.86560E-05 | 9.0219E-01  | 5.4042E-01  |
| CCNA_02744 | 1.32256E-04 | 7.99136E-05 | 7.2671E-01  | 4.4035E-01  |
| CCNA_02745 | 1.34410E-04 | 8.45367E-05 | 6.6890E-01  | 4.0738E-01  |
| CCNA_02746 | 5.88204E-05 | 6.16539E-05 | -6.7977E-02 | -1.2843E-02 |
| CCNA_02747 | 3.74850E-05 | 1.09386E-04 | -1.5450E+00 | -8.5517E-01 |
| CCNA_02748 | 2.82424E-05 | 1.47879E-04 | -2.3884E+00 | -1.3361E+00 |
| CCNA_02749 | 7.60445E-05 | 5.64979E-05 | 4.2851E-01  | 2.7029E-01  |
| CCNA_02750 | 1.74288E-05 | 7.07349E-05 | -2.0209E+00 | -1.1265E+00 |
| CCNA_02751 | 2.20727E-05 | 9.57717E-05 | -2.1173E+00 | -1.1815E+00 |
| CCNA_02752 | 1.93661E-04 | 1.11202E-04 | 8.0028E-01  | 4.8230E-01  |
| CCNA_02753 | 5.14528E-05 | 9.49687E-05 | -8.8423E-01 | -4.7834E-01 |
| CCNA_02754 | 3.24776E-04 | 1.47324E-04 | 1.1404E+00  | 6.7626E-01  |

|            |             |             |             |             |
|------------|-------------|-------------|-------------|-------------|
| CCNA_02755 | 3.81255E-04 | 8.82967E-05 | 2.1102E+00  | 1.2293E+00  |
| CCNA_02756 | 8.94073E-05 | 1.09806E-04 | -2.9654E-01 | -1.4319E-01 |
| CCNA_02757 | 1.00585E-04 | 1.20718E-04 | -2.6328E-01 | -1.2422E-01 |
| CCNA_02758 | 2.51305E-05 | 1.17446E-04 | -2.2244E+00 | -1.2426E+00 |
| CCNA_02759 | 3.79455E-05 | 9.77981E-05 | -1.3659E+00 | -7.5300E-01 |
| CCNA_02760 | 5.03362E-05 | 1.13281E-04 | -1.1702E+00 | -6.4144E-01 |
| CCNA_02761 | 8.79747E-05 | 1.45042E-04 | -7.2134E-01 | -3.8544E-01 |
| CCNA_02762 | 1.32927E-04 | 3.17688E-05 | 2.0646E+00  | 1.2033E+00  |
| CCNA_02763 | 9.31874E-05 | 4.83099E-05 | 9.4764E-01  | 5.6634E-01  |
| CCNA_02764 | 5.36934E-04 | 9.66498E-05 | 2.4738E+00  | 1.4367E+00  |
| CCNA_02765 | 1.25099E-04 | 1.15953E-04 | 1.0947E-01  | 8.8351E-02  |
| CCNA_02766 | 1.90561E-04 | 1.47324E-04 | 3.7121E-01  | 2.3762E-01  |
| CCNA_02767 | 3.23876E-04 | 9.91640E-05 | 1.7075E+00  | 9.9965E-01  |
| CCNA_02768 | 6.18204E-04 | 1.47099E-04 | 2.0712E+00  | 1.2071E+00  |
| CCNA_02769 | 1.84130E-05 | 8.23978E-05 | -2.1618E+00 | -1.2069E+00 |
| CCNA_02770 | 4.88013E-05 | 0.00000E+00 | 1.2667E+01  | 7.2495E+00  |
| CCNA_02771 | 1.00016E-04 | 0.00000E+00 | 1.3702E+01  | 7.8399E+00  |
| CCNA_02772 | 1.44493E-05 | 0.00000E+00 | 1.0911E+01  | 6.2483E+00  |
| CCNA_02773 | 2.12631E-05 | 0.00000E+00 | 1.1468E+01  | 6.5661E+00  |
| CCNA_02774 | 1.05557E-04 | 6.92264E-05 | 6.0851E-01  | 3.7294E-01  |
| CCNA_02775 | 4.53613E-05 | 8.47543E-05 | -9.0186E-01 | -4.8839E-01 |
| CCNA_02776 | 1.90510E-05 | 1.40892E-04 | -2.8865E+00 | -1.6202E+00 |
| CCNA_02777 | 9.38495E-05 | 6.70425E-05 | 4.8516E-01  | 3.0260E-01  |
| CCNA_02778 | 2.65119E-05 | 7.04422E-05 | -1.4098E+00 | -7.7805E-01 |
| CCNA_02779 | 2.67939E-04 | 1.29109E-04 | 1.0532E+00  | 6.2657E-01  |
| CCNA_02780 | 5.88685E-05 | 1.47099E-04 | -1.3212E+00 | -7.2754E-01 |
| CCNA_02781 | 5.01153E-04 | 5.75486E-05 | 3.1222E+00  | 1.8065E+00  |
| CCNA_02782 | 3.96327E-04 | 5.51395E-05 | 2.8453E+00  | 1.6486E+00  |
| CCNA_02783 | 3.86570E-04 | 5.65279E-05 | 2.7735E+00  | 1.6076E+00  |
| CCNA_02784 | 1.84852E-05 | 3.68497E-05 | -9.9534E-01 | -5.4170E-01 |
| CCNA_02785 | 1.99238E-05 | 9.14638E-05 | -2.1986E+00 | -1.2279E+00 |
| CCNA_02786 | 7.39769E-05 | 1.01220E-04 | -4.5240E-01 | -2.3207E-01 |
| CCNA_02787 | 8.52029E-05 | 1.32606E-04 | -6.3821E-01 | -3.3803E-01 |
| CCNA_02788 | 1.28361E-04 | 1.25034E-04 | 3.7836E-02  | 4.7499E-02  |
| CCNA_02789 | 1.59694E-04 | 7.15980E-05 | 1.1572E+00  | 6.8585E-01  |
| CCNA_02790 | 1.57220E-04 | 1.36389E-04 | 2.0501E-01  | 1.4284E-01  |
| CCNA_02791 | 2.79686E-05 | 1.35361E-04 | -2.2749E+00 | -1.2714E+00 |
| CCNA_02792 | 3.23416E-05 | 8.88071E-05 | -1.4573E+00 | -8.0513E-01 |
| CCNA_02793 | 2.50020E-04 | 1.11517E-04 | 1.1647E+00  | 6.9012E-01  |
| CCNA_02794 | 3.10447E-04 | 1.07600E-04 | 1.5286E+00  | 8.9764E-01  |
| CCNA_02795 | 7.19665E-05 | 7.65213E-05 | -8.8618E-02 | -2.4615E-02 |
| CCNA_02796 | 1.10445E-04 | 1.05326E-04 | 6.8404E-02  | 6.4932E-02  |
| CCNA_02797 | 9.25253E-05 | 5.80965E-05 | 6.7126E-01  | 4.0873E-01  |
| CCNA_02798 | 1.26002E-04 | 5.63928E-05 | 1.1597E+00  | 6.8727E-01  |
| CCNA_02799 | 1.18556E-04 | 4.98109E-05 | 1.2509E+00  | 7.3925E-01  |
| CCNA_02800 | 9.79577E-05 | 9.58768E-05 | 3.0908E-02  | 4.3549E-02  |
| CCNA_02801 | 2.09381E-05 | 1.35091E-04 | -2.6896E+00 | -1.5079E+00 |
| CCNA_02802 | 1.70105E-05 | 1.13949E-04 | -2.7437E+00 | -1.5388E+00 |
| CCNA_02803 | 1.59848E-04 | 8.85369E-05 | 8.5225E-01  | 5.1194E-01  |
| CCNA_02804 | 3.35695E-05 | 5.17997E-05 | -6.2587E-01 | -3.3100E-01 |
| CCNA_02805 | 1.59848E-04 | 8.85369E-05 | 8.5225E-01  | 5.1194E-01  |
| CCNA_02806 | 1.55219E-04 | 4.05797E-05 | 1.9352E+00  | 1.1295E+00  |
| CCNA_02807 | 1.65289E-05 | 5.37661E-05 | -1.7016E+00 | -9.4449E-01 |

|            |             |             |             |             |
|------------|-------------|-------------|-------------|-------------|
| CCNA_02808 | 1.68660E-05 | 9.10210E-05 | -2.4319E+00 | -1.3610E+00 |
| CCNA_02809 | 3.28953E-05 | 1.46949E-04 | -2.1593E+00 | -1.2055E+00 |
| CCNA_02810 | 2.44533E-05 | 6.85735E-05 | -1.4876E+00 | -8.2242E-01 |
| CCNA_02811 | 1.82565E-05 | 1.04928E-04 | -2.5228E+00 | -1.4128E+00 |
| CCNA_02812 | 5.39478E-05 | 0.00000E+00 | 1.2811E+01  | 7.3320E+00  |
| CCNA_02813 | 4.74800E-05 | 0.00000E+00 | 1.2627E+01  | 7.2270E+00  |
| CCNA_02814 | 0.00000E+00 | 0.00000E+00 | -1.3183E+00 | -7.2586E-01 |
| CCNA_02815 | 5.93531E-05 | 3.74651E-05 | 6.6356E-01  | 4.0433E-01  |
| CCNA_02816 | 3.84403E-04 | 1.17206E-04 | 1.7135E+00  | 1.0031E+00  |
| CCNA_02817 | 1.71269E-04 | 1.47099E-04 | 2.1944E-01  | 1.5106E-01  |
| CCNA_02818 | 1.91922E-04 | 1.46858E-04 | 3.8604E-01  | 2.4607E-01  |
| CCNA_02819 | 4.87170E-05 | 1.03104E-04 | -1.0816E+00 | -5.9090E-01 |
| CCNA_02820 | 1.43114E-04 | 1.37665E-04 | 5.5960E-02  | 5.7835E-02  |
| CCNA_02821 | 1.91594E-05 | 9.39630E-05 | -2.2939E+00 | -1.2823E+00 |
| CCNA_02822 | 1.79441E-04 | 1.15097E-04 | 6.4058E-01  | 3.9123E-01  |
| CCNA_02823 | 6.42317E-05 | 5.34959E-05 | 2.6372E-01  | 1.7632E-01  |
| CCNA_02824 | 7.44615E-05 | 5.54622E-05 | 4.2485E-01  | 2.6821E-01  |
| CCNA_02825 | 6.87040E-05 | 1.47099E-04 | -1.0983E+00 | -6.0043E-01 |
| CCNA_02826 | 4.79523E-04 | 1.44705E-04 | 1.7284E+00  | 1.0116E+00  |
| CCNA_02827 | 7.68662E-05 | 0.00000E+00 | 1.3322E+01  | 7.6233E+00  |
| CCNA_02828 | 1.27849E-05 | 0.00000E+00 | 1.0735E+01  | 6.1476E+00  |
| CCNA_02829 | 1.40731E-05 | 0.00000E+00 | 1.0873E+01  | 6.2266E+00  |
| CCNA_02830 | 1.00058E-04 | 6.07908E-07 | 7.3451E+00  | 4.2147E+00  |
| CCNA_02831 | 5.43781E-05 | 1.30858E-04 | -1.2669E+00 | -6.9656E-01 |
| CCNA_02832 | 2.84691E-04 | 1.47099E-04 | 9.5255E-01  | 5.6914E-01  |
| CCNA_02833 | 1.35816E-04 | 1.45440E-04 | -9.8814E-02 | -3.0429E-02 |
| CCNA_02834 | 2.26415E-05 | 6.49185E-05 | -1.5196E+00 | -8.4069E-01 |
| CCNA_02835 | 2.61468E-04 | 1.94681E-05 | 3.7469E+00  | 2.1627E+00  |
| CCNA_02836 | 5.66775E-05 | 1.05476E-04 | -8.9609E-01 | -4.8510E-01 |
| CCNA_02837 | 1.75326E-04 | 1.37410E-04 | 3.5151E-01  | 2.2638E-01  |
| CCNA_02838 | 9.36750E-05 | 1.37770E-04 | -5.5656E-01 | -2.9147E-01 |
| CCNA_02839 | 1.22011E-05 | 2.37985E-05 | -9.6396E-01 | -5.2380E-01 |
| CCNA_02840 | 1.52047E-05 | 6.00628E-05 | -1.9818E+00 | -1.1043E+00 |
| CCNA_02841 | 1.54334E-05 | 4.31164E-05 | -1.4821E+00 | -8.1931E-01 |
| CCNA_02842 | 3.89387E-05 | 6.39729E-05 | -7.1631E-01 | -3.8258E-01 |
| CCNA_02843 | 2.43179E-05 | 1.47099E-04 | -2.5966E+00 | -1.4549E+00 |
| CCNA_02844 | 2.47874E-05 | 8.67507E-05 | -1.8072E+00 | -1.0047E+00 |
| CCNA_02845 | 1.42491E-04 | 5.88320E-05 | 1.2760E+00  | 7.5362E-01  |
| CCNA_02846 | 1.05419E-04 | 1.24644E-04 | -2.4173E-01 | -1.1193E-01 |
| CCNA_02847 | 7.93310E-05 | 1.02083E-04 | -3.6384E-01 | -1.8157E-01 |
| CCNA_02848 | 7.77630E-05 | 7.59284E-05 | 3.4358E-02  | 4.5516E-02  |
| CCNA_02849 | 1.25351E-04 | 8.73586E-05 | 5.2087E-01  | 3.2296E-01  |
| CCNA_02850 | 4.12019E-05 | 6.34476E-05 | -6.2292E-01 | -3.2931E-01 |
| CCNA_02851 | 1.00176E-04 | 2.46090E-05 | 2.0249E+00  | 1.1807E+00  |
| CCNA_02852 | 3.37835E-04 | 1.46318E-04 | 1.2071E+00  | 7.1433E-01  |
| CCNA_02853 | 7.78353E-05 | 8.35761E-05 | -1.0274E-01 | -3.2668E-02 |
| CCNA_02854 | 8.60004E-05 | 1.02219E-04 | -2.4930E-01 | -1.1625E-01 |
| CCNA_02855 | 7.55660E-05 | 6.66447E-05 | 1.8114E-01  | 1.2922E-01  |
| CCNA_02856 | 3.88845E-05 | 8.66531E-05 | -1.1561E+00 | -6.3336E-01 |
| CCNA_02857 | 3.30157E-05 | 9.16290E-05 | -1.4726E+00 | -8.1389E-01 |
| CCNA_02858 | 1.03504E-04 | 7.01571E-05 | 5.6092E-01  | 3.4580E-01  |
| CCNA_02859 | 1.88283E-04 | 8.69233E-05 | 1.1150E+00  | 6.6177E-01  |
| CCNA_02860 | 6.42437E-05 | 1.47849E-04 | -1.2025E+00 | -6.5984E-01 |

|            |             |             |             |             |
|------------|-------------|-------------|-------------|-------------|
| CCNA_02861 | 1.42085E-05 | 4.77170E-05 | -1.7477E+00 | -9.7073E-01 |
| CCNA_02862 | 5.52961E-05 | 1.07022E-04 | -9.5268E-01 | -5.1737E-01 |
| CCNA_02863 | 4.84040E-05 | 1.09664E-04 | -1.1799E+00 | -6.4695E-01 |
| CCNA_02864 | 5.22955E-05 | 1.31691E-04 | -1.3324E+00 | -7.3391E-01 |
| CCNA_02865 | 3.00663E-05 | 1.18925E-04 | -1.9838E+00 | -1.1054E+00 |
| CCNA_02866 | 4.05759E-05 | 6.61869E-05 | -7.0598E-01 | -3.7668E-01 |
| CCNA_02867 | 7.34532E-05 | 4.77395E-05 | 6.2147E-01  | 3.8034E-01  |
| CCNA_02868 | 8.89980E-05 | 1.05093E-04 | -2.3988E-01 | -1.1087E-01 |
| CCNA_02869 | 1.16109E-04 | 7.74069E-05 | 5.8484E-01  | 3.5944E-01  |
| CCNA_02870 | 7.52560E-05 | 1.24291E-04 | -7.2387E-01 | -3.8689E-01 |
| CCNA_02871 | 4.23185E-05 | 9.64547E-05 | -1.1886E+00 | -6.5189E-01 |
| CCNA_02872 | 1.75342E-05 | 9.70476E-05 | -2.4684E+00 | -1.3817E+00 |
| CCNA_02873 | 1.76064E-05 | 9.85936E-05 | -2.4853E+00 | -1.3914E+00 |
| CCNA_02874 | 5.17808E-05 | 7.03447E-05 | -4.4209E-01 | -2.2619E-01 |
| CCNA_02875 | 1.27819E-05 | 7.99436E-05 | -2.6447E+00 | -1.4823E+00 |
| CCNA_02877 | 1.28129E-04 | 1.16170E-04 | 1.4130E-01  | 1.0650E-01  |
| CCNA_02876 | 9.43913E-05 | 9.33851E-05 | 1.5391E-02  | 3.4699E-02  |
| CCNA_02878 | 1.44101E-05 | 8.72460E-05 | -2.5978E+00 | -1.4556E+00 |
| CCNA_02879 | 1.66704E-05 | 2.78587E-05 | -7.4097E-01 | -3.9663E-01 |
| CCNA_02880 | 1.65452E-04 | 1.28269E-04 | 3.6719E-01  | 2.3532E-01  |
| CCNA_02881 | 1.60823E-04 | 1.13574E-04 | 5.0178E-01  | 3.1207E-01  |
| CCNA_02882 | 1.39367E-04 | 1.47234E-04 | -7.9259E-02 | -1.9277E-02 |
| CCNA_02883 | 1.77918E-04 | 1.03539E-04 | 7.8095E-01  | 4.7128E-01  |
| CCNA_02884 | 1.87500E-05 | 1.41365E-04 | -2.9143E+00 | -1.6360E+00 |
| CCNA_02885 | 1.34410E-05 | 1.39286E-04 | -3.3731E+00 | -1.8977E+00 |
| CCNA_02886 | 6.98477E-05 | 6.43557E-05 | 1.1804E-01  | 9.3237E-02  |
| CCNA_02887 | 1.46268E-05 | 4.10450E-05 | -1.4886E+00 | -8.2297E-01 |
| CCNA_02888 | 2.66624E-05 | 1.05258E-04 | -1.9810E+00 | -1.1038E+00 |
| CCNA_02889 | 2.00315E-04 | 1.34363E-04 | 5.7608E-01  | 3.5445E-01  |
| CCNA_02890 | 2.32425E-04 | 3.15437E-05 | 2.8810E+00  | 1.6689E+00  |
| CCNA_02891 | 2.10338E-04 | 1.01408E-04 | 1.0524E+00  | 6.2611E-01  |
| CCNA_02892 | 6.05509E-05 | 9.78206E-05 | -6.9203E-01 | -3.6873E-01 |
| CCNA_02893 | 3.09240E-05 | 5.45466E-05 | -8.1882E-01 | -4.4103E-01 |
| CCNA_02894 | 1.57133E-05 | 1.30190E-04 | -3.0504E+00 | -1.7136E+00 |
| CCNA_02895 | 1.89700E-04 | 6.88362E-05 | 1.4624E+00  | 8.5987E-01  |
| CCNA_02896 | 1.70409E-04 | 8.86795E-05 | 9.4223E-01  | 5.6326E-01  |
| CCNA_02897 | 1.18228E-04 | 2.86317E-05 | 2.0455E+00  | 1.1924E+00  |
| CCNA_02898 | 6.43340E-05 | 1.25897E-04 | -9.6861E-01 | -5.2645E-01 |
| CCNA_02899 | 1.40354E-04 | 5.79689E-05 | 1.2756E+00  | 7.5335E-01  |
| CCNA_02900 | 5.01376E-05 | 1.72841E-05 | 1.5359E+00  | 9.0182E-01  |
| CCNA_02901 | 6.87401E-05 | 2.33857E-05 | 1.5551E+00  | 9.1278E-01  |
| CCNA_02902 | 1.11480E-04 | 1.32802E-04 | -2.5253E-01 | -1.1809E-01 |
| CCNA_02903 | 1.14008E-04 | 1.40937E-04 | -3.0595E-01 | -1.4856E-01 |
| CCNA_02904 | 1.10421E-04 | 1.19645E-04 | -1.1580E-01 | -4.0118E-02 |
| CCNA_02905 | 1.46807E-04 | 1.41920E-05 | 3.3700E+00  | 1.9478E+00  |
| CCNA_02906 | 3.10869E-04 | 9.86312E-05 | 1.6561E+00  | 9.7036E-01  |
| CCNA_02907 | 6.28713E-06 | 2.85191E-07 | 4.4256E+00  | 2.5498E+00  |
| CCNA_02908 | 3.81321E-05 | 1.47099E-04 | -1.9477E+00 | -1.0848E+00 |
| CCNA_02909 | 4.44313E-05 | 6.90388E-05 | -6.3589E-01 | -3.3671E-01 |
| CCNA_02910 | 2.13925E-05 | 1.47436E-04 | -2.7848E+00 | -1.5622E+00 |
| CCNA_02911 | 2.24332E-04 | 1.43639E-04 | 6.4314E-01  | 3.9269E-01  |
| CCNA_02912 | 1.85526E-04 | 4.73643E-05 | 1.9695E+00  | 1.1491E+00  |
| CCNA_02913 | 2.55729E-05 | 8.93699E-05 | -1.8051E+00 | -1.0035E+00 |

|            |             |             |             |             |
|------------|-------------|-------------|-------------|-------------|
| CCNA_02914 | 1.61335E-04 | 7.93132E-05 | 1.0243E+00  | 6.1007E-01  |
| CCNA_02915 | 1.44556E-04 | 1.05341E-04 | 4.5649E-01  | 2.8625E-01  |
| CCNA_02916 | 1.27058E-04 | 1.47662E-04 | -2.1685E-01 | -9.7741E-02 |
| CCNA_02917 | 2.64066E-05 | 7.67690E-05 | -1.5396E+00 | -8.5208E-01 |
| CCNA_02918 | 1.99960E-05 | 1.07224E-04 | -2.4227E+00 | -1.3557E+00 |
| CCNA_02919 | 3.39608E-05 | 1.01798E-04 | -1.5838E+00 | -8.7726E-01 |
| CCNA_02920 | 2.88143E-05 | 3.20615E-05 | -1.5425E-01 | -6.2040E-02 |
| CCNA_02921 | 2.61808E-05 | 3.57014E-05 | -4.4761E-01 | -2.2934E-01 |
| CCNA_02922 | 1.97462E-04 | 1.04072E-04 | 9.2391E-01  | 5.5281E-01  |
| CCNA_02923 | 8.76015E-05 | 1.47271E-04 | -7.4947E-01 | -4.0148E-01 |
| CCNA_02924 | 4.12648E-04 | 1.34370E-04 | 1.6186E+00  | 9.4899E-01  |
| CCNA_02925 | 1.98459E-04 | 9.33626E-06 | 4.4087E+00  | 2.5401E+00  |
| CCNA_02926 | 2.32585E-05 | 1.43789E-04 | -2.6280E+00 | -1.4728E+00 |
| CCNA_02927 | 1.06616E-04 | 9.55691E-05 | 1.5774E-01  | 1.1588E-01  |
| CCNA_02928 | 3.54565E-05 | 6.94066E-05 | -9.6905E-01 | -5.2671E-01 |
| CCNA_02929 | 8.28343E-05 | 1.45260E-04 | -8.1036E-01 | -4.3621E-01 |
| CCNA_02930 | 1.00408E-04 | 6.38003E-05 | 6.5411E-01  | 3.9894E-01  |
| CCNA_02931 | 1.33905E-04 | 1.03577E-04 | 3.7043E-01  | 2.3717E-01  |
| CCNA_02932 | 6.47885E-05 | 3.06431E-05 | 1.0799E+00  | 6.4176E-01  |
| CCNA_02933 | 1.34856E-04 | 1.16861E-04 | 2.0657E-01  | 1.4372E-01  |
| CCNA_02934 | 1.30805E-04 | 1.13168E-04 | 2.0888E-01  | 1.4504E-01  |
| CCNA_02935 | 2.39718E-05 | 1.46904E-04 | -2.6154E+00 | -1.4656E+00 |
| CCNA_02936 | 3.52248E-05 | 9.70251E-05 | -1.4618E+00 | -8.0768E-01 |
| CCNA_02937 | 2.03120E-05 | 1.41642E-04 | -2.8017E+00 | -1.5718E+00 |
| CCNA_02938 | 8.70508E-05 | 1.33912E-04 | -6.2139E-01 | -3.2844E-01 |
| CCNA_02939 | 6.21069E-05 | 8.86870E-05 | -5.1402E-01 | -2.6721E-01 |
| CCNA_02940 | 3.81953E-05 | 1.20606E-04 | -1.6588E+00 | -9.2006E-01 |
| CCNA_02941 | 6.10385E-05 | 8.02063E-05 | -3.9406E-01 | -1.9880E-01 |
| CCNA_02942 | 2.44292E-05 | 1.31113E-04 | -2.4240E+00 | -1.3564E+00 |
| CCNA_02943 | 3.32273E-04 | 1.37342E-04 | 1.2745E+00  | 7.5276E-01  |
| CCNA_02944 | 2.84333E-04 | 1.39549E-04 | 1.0267E+00  | 6.1145E-01  |
| CCNA_02945 | 2.23466E-05 | 1.39414E-04 | -2.6411E+00 | -1.4803E+00 |
| CCNA_02946 | 2.23436E-05 | 1.38213E-04 | -2.6288E+00 | -1.4732E+00 |
| CCNA_02947 | 2.55699E-05 | 1.22212E-04 | -2.2568E+00 | -1.2611E+00 |
| CCNA_02948 | 2.28010E-05 | 5.51545E-05 | -1.2744E+00 | -7.0083E-01 |
| CCNA_02949 | 1.58126E-04 | 4.82273E-05 | 1.7130E+00  | 1.0028E+00  |
| CCNA_02950 | 1.82113E-05 | 4.84975E-05 | -1.4131E+00 | -7.7991E-01 |
| CCNA_02951 | 1.59932E-05 | 5.94849E-05 | -1.8950E+00 | -1.0547E+00 |
| CCNA_02952 | 1.67336E-05 | 8.71485E-05 | -2.3806E+00 | -1.3317E+00 |
| CCNA_02953 | 1.58187E-05 | 1.18602E-04 | -2.9062E+00 | -1.6314E+00 |
| CCNA_02954 | 2.53592E-05 | 1.01813E-04 | -2.0053E+00 | -1.1176E+00 |
| CCNA_02955 | 3.87431E-05 | 1.30603E-04 | -1.7531E+00 | -9.7386E-01 |
| CCNA_02956 | 1.40869E-04 | 1.25995E-04 | 1.6094E-01  | 1.1770E-01  |
| CCNA_02957 | 1.22555E-04 | 5.77062E-05 | 1.0865E+00  | 6.4552E-01  |
| CCNA_02958 | 1.55550E-04 | 1.22925E-04 | 3.3954E-01  | 2.1956E-01  |
| CCNA_02959 | 1.58644E-04 | 1.12560E-04 | 4.9502E-01  | 3.0822E-01  |
| CCNA_02960 | 7.44253E-05 | 1.12020E-04 | -5.8993E-01 | -3.1050E-01 |
| CCNA_02961 | 8.04958E-05 | 8.31408E-05 | -4.6719E-02 | -7.2046E-04 |
| CCNA_02962 | 1.85279E-04 | 1.47099E-04 | 3.3287E-01  | 2.1575E-01  |
| CCNA_02963 | 3.40095E-04 | 1.17304E-04 | 1.5356E+00  | 9.0165E-01  |
| CCNA_02964 | 3.34196E-04 | 1.03194E-04 | 1.6952E+00  | 9.9268E-01  |
| CCNA_02965 | 2.00923E-05 | 5.80664E-05 | -1.5310E+00 | -8.4719E-01 |
| CCNA_02966 | 2.34812E-05 | 6.53313E-05 | -1.4762E+00 | -8.1595E-01 |



|            |             |             |             |             |
|------------|-------------|-------------|-------------|-------------|
| CCNA_02967 | 2.43781E-05 | 1.34205E-04 | -2.4607E+00 | -1.3774E+00 |
| CCNA_02968 | 2.85193E-05 | 1.44817E-04 | -2.3441E+00 | -1.3109E+00 |
| CCNA_02969 | 2.84922E-05 | 4.35967E-05 | -6.1375E-01 | -3.2408E-01 |
| CCNA_02970 | 1.92226E-05 | 5.08691E-05 | -1.4040E+00 | -7.7473E-01 |
| CCNA_02971 | 2.35173E-05 | 1.43601E-04 | -2.6102E+00 | -1.4626E+00 |
| CCNA_02972 | 3.01385E-05 | 9.76180E-05 | -1.6955E+00 | -9.4099E-01 |
| CCNA_02973 | 2.49288E-05 | 1.47099E-04 | -2.5608E+00 | -1.4344E+00 |
| CCNA_02974 | 4.10063E-05 | 8.65631E-05 | -1.0779E+00 | -5.8879E-01 |
| CCNA_02975 | 1.47861E-04 | 8.95351E-05 | 7.2362E-01  | 4.3859E-01  |
| CCNA_02976 | 1.51189E-04 | 1.03727E-04 | 5.4349E-01  | 3.3586E-01  |
| CCNA_02977 | 1.43448E-04 | 8.48294E-05 | 7.5780E-01  | 4.5808E-01  |
| CCNA_02978 | 2.87751E-05 | 1.46273E-04 | -2.3457E+00 | -1.3118E+00 |
| CCNA_02979 | 6.77048E-05 | 1.29462E-04 | -9.3522E-01 | -5.0741E-01 |
| CCNA_02980 | 2.57866E-05 | 9.90139E-05 | -1.9410E+00 | -1.0810E+00 |
| CCNA_02981 | 4.81632E-05 | 1.47391E-04 | -1.6136E+00 | -8.9430E-01 |
| CCNA_02982 | 1.01009E-04 | 1.25679E-04 | -3.1530E-01 | -1.5389E-01 |
| CCNA_02983 | 1.76997E-05 | 1.47099E-04 | -3.0548E+00 | -1.7162E+00 |
| CCNA_02984 | 4.69714E-05 | 1.05100E-04 | -1.1619E+00 | -6.3670E-01 |
| CCNA_02985 | 5.91033E-05 | 6.08658E-05 | -4.2499E-02 | 1.6863E-03  |
| CCNA_02986 | 2.37123E-04 | 6.90013E-05 | 1.7808E+00  | 1.0415E+00  |
| CCNA_02987 | 1.86236E-04 | 1.19885E-04 | 6.3541E-01  | 3.8828E-01  |
| CCNA_02988 | 2.71235E-04 | 1.62709E-05 | 4.0585E+00  | 2.3404E+00  |
| CCNA_02989 | 5.66233E-05 | 9.14638E-05 | -6.9185E-01 | -3.6862E-01 |
| CCNA_02990 | 0.00000E+00 | 0.00000E+00 | -1.3183E+00 | -7.2586E-01 |
| CCNA_02991 | 5.26687E-07 | 0.00000E+00 | 6.1412E+00  | 3.5281E+00  |
| CCNA_02992 | 2.64246E-05 | 3.63544E-05 | -4.6038E-01 | -2.3662E-01 |
| CCNA_02993 | 1.15058E-05 | 5.09292E-05 | -2.1460E+00 | -1.1979E+00 |
| CCNA_02994 | 1.41658E-04 | 5.52821E-05 | 1.3574E+00  | 7.9999E-01  |
| CCNA_02995 | 8.39328E-05 | 1.17626E-04 | -4.8695E-01 | -2.5177E-01 |
| CCNA_02996 | 1.47954E-05 | 1.21964E-04 | -3.0430E+00 | -1.7095E+00 |
| CCNA_02997 | 8.95789E-05 | 4.70641E-05 | 9.2835E-01  | 5.5534E-01  |
| CCNA_02998 | 2.37409E-04 | 4.82649E-05 | 2.2981E+00  | 1.3365E+00  |
| CCNA_02999 | 1.20879E-04 | 1.45890E-04 | -2.7136E-01 | -1.2883E-01 |
| CCNA_03000 | 1.47842E-04 | 1.17266E-04 | 3.3421E-01  | 2.1652E-01  |
| CCNA_03001 | 4.07625E-05 | 5.39087E-05 | -4.0337E-01 | -2.0411E-01 |
| CCNA_03002 | 1.79889E-04 | 1.02159E-04 | 8.1622E-01  | 4.9139E-01  |
| CCNA_03003 | 1.52372E-04 | 8.44466E-05 | 8.5139E-01  | 5.1145E-01  |
| CCNA_03004 | 1.84310E-05 | 1.09116E-04 | -2.5655E+00 | -1.4371E+00 |
| CCNA_03005 | 3.76987E-05 | 6.46033E-05 | -7.7715E-01 | -4.1727E-01 |
| CCNA_03006 | 8.06733E-05 | 1.04635E-04 | -3.7525E-01 | -1.8808E-01 |
| CCNA_03007 | 1.80717E-04 | 7.49528E-05 | 1.2696E+00  | 7.4992E-01  |
| CCNA_03008 | 4.45818E-05 | 1.01288E-04 | -1.1839E+00 | -6.4926E-01 |
| CCNA_03009 | 1.45621E-04 | 1.11502E-04 | 3.8508E-01  | 2.4553E-01  |
| CCNA_03010 | 7.96501E-05 | 1.18467E-04 | -5.7277E-01 | -3.0072E-01 |
| CCNA_03011 | 3.08247E-05 | 1.45958E-04 | -2.2433E+00 | -1.2534E+00 |
| CCNA_03012 | 2.91604E-05 | 1.47519E-04 | -2.3387E+00 | -1.3078E+00 |
| CCNA_03013 | 1.29014E-04 | 8.24353E-05 | 6.4610E-01  | 3.9438E-01  |
| CCNA_03014 | 7.28694E-05 | 8.17448E-05 | -1.6589E-01 | -6.8680E-02 |
| CCNA_03015 | 6.17849E-05 | 9.36778E-05 | -6.0050E-01 | -3.1653E-01 |
| CCNA_03016 | 1.09247E-04 | 7.39696E-05 | 5.6248E-01  | 3.4669E-01  |
| CCNA_03017 | 8.87091E-05 | 7.50503E-07 | 6.8708E+00  | 3.9442E+00  |
| CCNA_03018 | 5.84171E-05 | 5.55372E-07 | 6.6975E+00  | 3.8454E+00  |
| CCNA_03019 | 3.98774E-04 | 5.85468E-05 | 2.7677E+00  | 1.6043E+00  |

|            |             |             |             |             |
|------------|-------------|-------------|-------------|-------------|
| CCNA_03020 | 4.13085E-04 | 7.35418E-05 | 2.4897E+00  | 1.4457E+00  |
| CCNA_03021 | 2.66895E-05 | 1.04680E-04 | -1.9716E+00 | -1.0984E+00 |
| CCNA_03022 | 3.21911E-05 | 7.32641E-05 | -1.1865E+00 | -6.5069E-01 |
| CCNA_03023 | 2.54013E-05 | 1.09986E-04 | -2.1143E+00 | -1.1798E+00 |
| CCNA_03024 | 1.58442E-04 | 1.31969E-04 | 2.6371E-01  | 1.7631E-01  |
| CCNA_03025 | 1.59806E-04 | 9.64622E-05 | 7.2820E-01  | 4.4120E-01  |
| CCNA_03026 | 2.87571E-05 | 3.36826E-05 | -2.2826E-01 | -1.0425E-01 |
| CCNA_03027 | 1.66583E-05 | 6.95116E-05 | -2.0609E+00 | -1.1494E+00 |
| CCNA_03028 | 3.74489E-05 | 1.39256E-04 | -1.8947E+00 | -1.0546E+00 |
| CCNA_03029 | 2.38234E-04 | 1.42025E-04 | 7.4617E-01  | 4.5145E-01  |
| CCNA_03030 | 2.33075E-04 | 1.45012E-04 | 6.8457E-01  | 4.1631E-01  |
| CCNA_03031 | 1.78411E-05 | 8.75612E-05 | -2.2950E+00 | -1.2828E+00 |
| CCNA_03032 | 1.62520E-04 | 1.07104E-04 | 6.0153E-01  | 3.6896E-01  |
| CCNA_03033 | 2.14819E-04 | 4.52178E-05 | 2.2479E+00  | 1.3079E+00  |
| CCNA_03034 | 3.15651E-05 | 8.76363E-05 | -1.4732E+00 | -8.1420E-01 |
| CCNA_03035 | 1.26299E-04 | 5.17472E-05 | 1.2871E+00  | 7.5994E-01  |
| CCNA_03036 | 4.44253E-05 | 6.37478E-05 | -5.2107E-01 | -2.7123E-01 |
| CCNA_03037 | 9.84091E-05 | 9.85786E-05 | -2.5481E-03 | 2.4469E-02  |
| CCNA_03038 | 7.91294E-05 | 6.87611E-05 | 2.0252E-01  | 1.4141E-01  |
| CCNA_03039 | 1.35662E-04 | 8.90022E-05 | 6.0802E-01  | 3.7266E-01  |
| CCNA_03040 | 1.56191E-04 | 6.90688E-05 | 1.1771E+00  | 6.9718E-01  |
| CCNA_03041 | 4.09798E-04 | 1.06106E-04 | 1.9493E+00  | 1.1376E+00  |
| CCNA_03042 | 7.07325E-05 | 9.43833E-05 | -4.1621E-01 | -2.1143E-01 |
| CCNA_03043 | 3.44480E-04 | 1.03449E-04 | 1.7354E+00  | 1.0156E+00  |
| CCNA_03044 | 2.95989E-04 | 1.38671E-04 | 1.0938E+00  | 6.4970E-01  |
| CCNA_03045 | 3.67748E-05 | 9.00079E-05 | -1.2913E+00 | -7.1050E-01 |
| CCNA_03046 | 3.15801E-05 | 8.84543E-05 | -1.4859E+00 | -8.2145E-01 |
| CCNA_03047 | 1.09154E-04 | 1.16793E-04 | -9.7652E-02 | -2.9766E-02 |
| CCNA_03048 | 1.17484E-04 | 1.17334E-04 | 1.7944E-03  | 2.6946E-02  |
| CCNA_03049 | 1.79495E-05 | 8.73586E-06 | 1.0379E+00  | 6.1783E-01  |
| CCNA_03050 | 6.66575E-05 | 1.31023E-04 | -9.7500E-01 | -5.3010E-01 |
| CCNA_03051 | 1.40788E-04 | 7.21084E-05 | 9.6517E-01  | 5.7633E-01  |
| CCNA_03052 | 1.14330E-04 | 1.35601E-04 | -2.4620E-01 | -1.1448E-01 |
| CCNA_03053 | 1.30591E-04 | 1.47099E-04 | -1.7177E-01 | -7.2032E-02 |
| CCNA_03055 | 1.13054E-04 | 8.57450E-05 | 3.9880E-01  | 2.5335E-01  |
| CCNA_03054 | 1.30949E-04 | 5.42464E-05 | 1.2712E+00  | 7.5088E-01  |
| CCNA_03056 | 3.75242E-05 | 1.32591E-04 | -1.8211E+00 | -1.0126E+00 |
| CCNA_03057 | 1.04781E-04 | 1.47421E-04 | -4.9261E-01 | -2.5500E-01 |
| CCNA_03058 | 2.83117E-05 | 6.42131E-05 | -1.1815E+00 | -6.4785E-01 |
| CCNA_03059 | 2.13946E-04 | 8.23978E-05 | 1.3765E+00  | 8.1089E-01  |
| CCNA_03060 | 1.82538E-04 | 7.67915E-05 | 1.2491E+00  | 7.3823E-01  |
| CCNA_03061 | 1.51096E-04 | 1.47099E-04 | 3.8635E-02  | 4.7955E-02  |
| CCNA_03062 | 5.12078E-04 | 6.60518E-05 | 2.9545E+00  | 1.7108E+00  |
| CCNA_03063 | 7.57646E-05 | 1.47046E-04 | -9.5669E-01 | -5.1966E-01 |
| CCNA_03064 | 1.26170E-04 | 2.24025E-05 | 2.4932E+00  | 1.4477E+00  |
| CCNA_03065 | 1.27864E-04 | 4.39495E-05 | 1.5405E+00  | 9.0443E-01  |
| CCNA_03066 | 2.23601E-04 | 5.91472E-05 | 1.9184E+00  | 1.1199E+00  |
| CCNA_03067 | 2.09742E-05 | 6.50461E-05 | -1.6328E+00 | -9.0523E-01 |
| CCNA_03068 | 4.77509E-05 | 1.26933E-04 | -1.4105E+00 | -7.7843E-01 |
| CCNA_03069 | 1.92918E-05 | 1.42010E-04 | -2.8798E+00 | -1.6164E+00 |
| CCNA_03070 | 2.16513E-05 | 7.06149E-05 | -1.7055E+00 | -9.4667E-01 |
| CCNA_03071 | 4.94273E-05 | 6.06332E-05 | -2.9489E-01 | -1.4225E-01 |
| CCNA_03072 | 2.18647E-04 | 6.46784E-05 | 1.7571E+00  | 1.0280E+00  |

|            |             |             |             |             |
|------------|-------------|-------------|-------------|-------------|
| CCNA_03073 | 2.23736E-05 | 7.73919E-05 | -1.7903E+00 | -9.9506E-01 |
| CCNA_03074 | 5.61508E-05 | 3.78779E-05 | 5.6774E-01  | 3.4969E-01  |
| CCNA_03075 | 6.43701E-05 | 3.40428E-05 | 9.1879E-01  | 5.4989E-01  |
| CCNA_03076 | 4.44223E-05 | 5.57549E-05 | -3.2791E-01 | -1.6108E-01 |
| CCNA_03077 | 1.44132E-05 | 1.04793E-04 | -2.8619E+00 | -1.6061E+00 |
| CCNA_03078 | 1.81632E-05 | 5.93123E-05 | -1.7073E+00 | -9.4769E-01 |
| CCNA_03079 | 1.61356E-04 | 8.03714E-05 | 1.0054E+00  | 5.9927E-01  |
| CCNA_03080 | 6.26877E-05 | 9.51863E-05 | -6.0262E-01 | -3.1774E-01 |
| CCNA_03081 | 2.86307E-05 | 1.24854E-04 | -2.1245E+00 | -1.1857E+00 |
| CCNA_03082 | 1.31515E-04 | 2.91796E-05 | 2.1719E+00  | 1.2645E+00  |
| CCNA_03083 | 5.98436E-05 | 8.95951E-05 | -5.8227E-01 | -3.0613E-01 |
| CCNA_03084 | 4.06090E-05 | 2.87443E-05 | 4.9826E-01  | 3.1007E-01  |
| CCNA_03085 | 3.07103E-05 | 6.52338E-05 | -1.0869E+00 | -5.9392E-01 |
| CCNA_03086 | 1.46548E-04 | 7.33317E-05 | 9.9875E-01  | 5.9549E-01  |
| CCNA_03087 | 1.47204E-04 | 7.33317E-05 | 1.0052E+00  | 5.9916E-01  |
| CCNA_03088 | 3.10896E-05 | 6.38528E-05 | -1.0384E+00 | -5.6623E-01 |
| CCNA_03089 | 2.47422E-05 | 9.86161E-05 | -1.9948E+00 | -1.1117E+00 |
| CCNA_03090 | 1.07234E-03 | 7.35869E-05 | 3.8650E+00  | 2.2301E+00  |
| CCNA_03091 | 1.14360E-03 | 4.75444E-05 | 4.5879E+00  | 2.6423E+00  |
| CCNA_03092 | 4.42203E-04 | 1.46723E-04 | 1.5915E+00  | 9.3355E-01  |
| CCNA_03093 | 9.20317E-05 | 7.75195E-05 | 2.4748E-01  | 1.6705E-01  |
| CCNA_03094 | 1.31085E-04 | 1.38010E-04 | -7.4319E-02 | -1.6460E-02 |
| CCNA_03095 | 1.85445E-04 | 1.19705E-04 | 6.3144E-01  | 3.8602E-01  |
| CCNA_03096 | 7.83499E-05 | 2.68305E-05 | 1.5457E+00  | 9.0741E-01  |
| CCNA_03097 | 9.91676E-05 | 1.25747E-04 | -3.4262E-01 | -1.6947E-01 |
| CCNA_03098 | 1.00853E-04 | 1.30475E-04 | -3.7156E-01 | -1.8597E-01 |
| CCNA_03099 | 1.11736E-04 | 7.82850E-05 | 5.1318E-01  | 3.1858E-01  |
| CCNA_03100 | 1.18267E-04 | 1.35098E-04 | -1.9201E-01 | -8.3575E-02 |
| CCNA_03101 | 1.25743E-05 | 2.93072E-05 | -1.2208E+00 | -6.7027E-01 |
| CCNA_03102 | 1.49158E-05 | 7.21009E-05 | -2.2730E+00 | -1.2703E+00 |
| CCNA_03103 | 1.35765E-05 | 4.53004E-05 | -1.7383E+00 | -9.6541E-01 |
| CCNA_03104 | 1.95235E-05 | 7.38495E-05 | -1.9193E+00 | -1.0686E+00 |
| CCNA_03105 | 2.00072E-04 | 1.05176E-04 | 9.2764E-01  | 5.5493E-01  |
| CCNA_03106 | 7.95477E-05 | 8.13771E-05 | -3.2880E-02 | 7.1717E-03  |
| CCNA_03107 | 2.78732E-04 | 3.93789E-05 | 2.8231E+00  | 1.6359E+00  |
| CCNA_03108 | 8.81673E-05 | 1.43616E-04 | -7.0393E-01 | -3.7551E-01 |
| CCNA_03109 | 8.90221E-05 | 1.44810E-04 | -7.0195E-01 | -3.7438E-01 |
| CCNA_03110 | 1.46184E-04 | 8.78089E-05 | 7.3525E-01  | 4.4522E-01  |
| CCNA_03111 | 1.28087E-04 | 9.74003E-05 | 3.9505E-01  | 2.5121E-01  |
| CCNA_03112 | 6.01386E-05 | 7.32566E-05 | -2.8474E-01 | -1.3646E-01 |
| CCNA_03113 | 2.19120E-04 | 1.10639E-04 | 9.8578E-01  | 5.8809E-01  |
| CCNA_03114 | 2.64189E-04 | 4.92856E-05 | 2.4221E+00  | 1.4072E+00  |
| CCNA_03115 | 1.93739E-04 | 1.28133E-04 | 5.9641E-01  | 3.6604E-01  |
| CCNA_03116 | 4.22132E-05 | 6.48210E-05 | -6.1883E-01 | -3.2698E-01 |
| CCNA_03117 | 1.07552E-04 | 1.31263E-05 | 3.0337E+00  | 1.7560E+00  |
| CCNA_03118 | 2.79237E-04 | 4.63061E-05 | 2.5920E+00  | 1.5041E+00  |
| CCNA_03119 | 2.06645E-04 | 1.06181E-04 | 9.6054E-01  | 5.7370E-01  |
| CCNA_03120 | 9.02320E-05 | 8.80115E-05 | 3.5871E-02  | 4.6379E-02  |
| CCNA_03121 | 3.29856E-05 | 1.46070E-04 | -2.1467E+00 | -1.1983E+00 |
| CCNA_03122 | 5.61478E-05 | 9.72277E-05 | -7.9217E-01 | -4.2584E-01 |
| CCNA_03123 | 3.29405E-05 | 8.73361E-05 | -1.4067E+00 | -7.7629E-01 |
| CCNA_03124 | 7.97434E-05 | 1.26828E-04 | -6.6946E-01 | -3.5586E-01 |
| CCNA_03125 | 2.14377E-05 | 1.26707E-04 | -2.5632E+00 | -1.4358E+00 |

|            |             |             |             |             |
|------------|-------------|-------------|-------------|-------------|
| CCNA_03126 | 1.40881E-04 | 8.50696E-05 | 7.2767E-01  | 4.4089E-01  |
| CCNA_03127 | 1.67209E-04 | 5.20174E-05 | 1.6844E+00  | 9.8650E-01  |
| CCNA_03128 | 1.84130E-05 | 1.04538E-04 | -2.5051E+00 | -1.4027E+00 |
| CCNA_03129 | 8.70809E-05 | 4.76420E-05 | 8.6995E-01  | 5.2203E-01  |
| CCNA_03130 | 2.62347E-04 | 1.45252E-04 | 8.5286E-01  | 5.1229E-01  |
| CCNA_03131 | 3.15031E-04 | 1.34903E-04 | 1.2235E+00  | 7.2366E-01  |
| CCNA_03132 | 2.17323E-04 | 1.13986E-04 | 9.3090E-01  | 5.5680E-01  |
| CCNA_03133 | 4.82836E-05 | 8.94150E-05 | -8.8901E-01 | -4.8106E-01 |
| CCNA_03134 | 4.57465E-05 | 8.24953E-05 | -8.5069E-01 | -4.5921E-01 |
| CCNA_03135 | 2.51362E-04 | 1.47099E-04 | 7.7293E-01  | 4.6670E-01  |
| CCNA_03136 | 1.54148E-04 | 1.44502E-04 | 9.3177E-02  | 7.9059E-02  |
| CCNA_03137 | 3.99680E-05 | 6.81232E-05 | -7.6935E-01 | -4.1282E-01 |
| CCNA_03138 | 4.14548E-05 | 1.46581E-04 | -1.8221E+00 | -1.0132E+00 |
| CCNA_03139 | 3.94925E-05 | 6.41455E-05 | -6.9983E-01 | -3.7317E-01 |
| CCNA_03140 | 5.06733E-05 | 3.84858E-05 | 3.9670E-01  | 2.5215E-01  |
| CCNA_03141 | 3.04244E-05 | 1.47099E-04 | -2.2734E+00 | -1.2706E+00 |
| CCNA_03142 | 7.37181E-05 | 1.47099E-04 | -9.9671E-01 | -5.4248E-01 |
| CCNA_03143 | 2.75608E-04 | 6.31248E-05 | 2.1262E+00  | 1.2384E+00  |
| CCNA_03144 | 1.06451E-04 | 4.77095E-05 | 1.1577E+00  | 6.8611E-01  |
| CCNA_03145 | 9.75845E-05 | 6.57591E-05 | 5.6934E-01  | 3.5060E-01  |
| CCNA_03146 | 1.30113E-04 | 1.37552E-04 | -8.0264E-02 | -1.9850E-02 |
| CCNA_03147 | 7.77871E-05 | 7.85102E-05 | -1.3430E-02 | 1.8263E-02  |
| CCNA_03148 | 1.38940E-04 | 1.33244E-04 | 6.0337E-02  | 6.0331E-02  |
| CCNA_03149 | 8.18772E-05 | 7.68966E-05 | 9.0455E-02  | 7.7507E-02  |
| CCNA_03150 | 2.64938E-05 | 1.24644E-04 | -2.2340E+00 | -1.2481E+00 |
| CCNA_03151 | 2.04084E-05 | 6.64871E-05 | -1.7039E+00 | -9.4575E-01 |
| CCNA_03152 | 1.74336E-04 | 8.74336E-05 | 9.9551E-01  | 5.9364E-01  |
| CCNA_03153 | 9.46050E-05 | 1.46153E-04 | -6.2752E-01 | -3.3194E-01 |
| CCNA_03154 | 5.45166E-05 | 8.46718E-05 | -6.3523E-01 | -3.3634E-01 |
| CCNA_03155 | 2.33741E-04 | 1.44712E-04 | 6.9167E-01  | 4.2036E-01  |
| CCNA_03156 | 1.56757E-04 | 9.68374E-05 | 6.9481E-01  | 4.2216E-01  |
| CCNA_03157 | 7.74169E-05 | 1.02008E-04 | -3.9802E-01 | -2.0106E-01 |
| CCNA_03158 | 2.16423E-05 | 8.41690E-05 | -1.9594E+00 | -1.0915E+00 |
| CCNA_03159 | 2.27920E-05 | 1.05543E-04 | -2.2111E+00 | -1.2350E+00 |
| CCNA_03160 | 1.68407E-04 | 7.52605E-05 | 1.1619E+00  | 6.8851E-01  |
| CCNA_03161 | 1.31924E-04 | 1.09356E-04 | 2.7062E-01  | 1.8025E-01  |
| CCNA_03162 | 5.53503E-05 | 7.43374E-05 | -4.2556E-01 | -2.1677E-01 |
| CCNA_03163 | 3.11618E-05 | 8.39063E-05 | -1.4290E+00 | -7.8900E-01 |
| CCNA_03164 | 3.19593E-05 | 8.01688E-05 | -1.3268E+00 | -7.3072E-01 |
| CCNA_03165 | 4.16143E-05 | 3.99493E-05 | 5.8741E-02  | 5.9421E-02  |
| CCNA_03166 | 4.93641E-05 | 6.92489E-05 | -4.8840E-01 | -2.5260E-01 |
| CCNA_03167 | 4.94348E-04 | 9.21693E-05 | 2.4231E+00  | 1.4077E+00  |
| CCNA_03168 | 3.56642E-05 | 1.10662E-04 | -1.6336E+00 | -9.0567E-01 |
| CCNA_03169 | 2.70085E-05 | 1.39939E-04 | -2.3732E+00 | -1.3275E+00 |
| CCNA_03170 | 4.39347E-05 | 5.39687E-05 | -2.9686E-01 | -1.4337E-01 |
| CCNA_03171 | 3.40423E-04 | 1.33882E-04 | 1.3463E+00  | 7.9368E-01  |
| CCNA_03172 | 9.32597E-05 | 6.71400E-05 | 4.7397E-01  | 2.9621E-01  |
| CCNA_03173 | 9.81292E-05 | 5.61752E-05 | 8.0460E-01  | 4.8477E-01  |
| CCNA_03174 | 7.57526E-05 | 8.39138E-05 | -1.4768E-01 | -5.8299E-02 |
| CCNA_03175 | 8.46310E-05 | 1.38288E-04 | -7.0844E-01 | -3.7809E-01 |
| CCNA_03176 | 3.75001E-05 | 9.42407E-05 | -1.3295E+00 | -7.3224E-01 |
| CCNA_03177 | 1.84370E-05 | 1.29462E-04 | -2.8117E+00 | -1.5775E+00 |
| CCNA_03178 | 6.12732E-05 | 1.47594E-04 | -1.2683E+00 | -6.9737E-01 |

|            |             |             |             |             |
|------------|-------------|-------------|-------------|-------------|
| CCNA_03179 | 3.57003E-05 | 1.01325E-04 | -1.5050E+00 | -8.3233E-01 |
| CCNA_03180 | 2.94674E-04 | 9.27772E-05 | 1.6672E+00  | 9.7667E-01  |
| CCNA_03181 | 3.15010E-04 | 7.95158E-05 | 1.9860E+00  | 1.1585E+00  |
| CCNA_03182 | 5.05288E-05 | 1.47099E-04 | -1.5416E+00 | -8.5321E-01 |
| CCNA_03183 | 1.23091E-04 | 1.32156E-04 | -1.0256E-01 | -3.2567E-02 |
| CCNA_03184 | 2.67123E-04 | 9.01730E-05 | 1.5666E+00  | 9.1934E-01  |
| CCNA_03185 | 2.18566E-04 | 8.42665E-05 | 1.3749E+00  | 8.1001E-01  |
| CCNA_03186 | 2.32464E-05 | 1.22137E-04 | -2.3933E+00 | -1.3389E+00 |
| CCNA_03187 | 2.19433E-05 | 6.86861E-05 | -1.6462E+00 | -9.1287E-01 |
| CCNA_03188 | 2.66594E-05 | 6.53388E-05 | -1.2933E+00 | -7.1162E-01 |
| CCNA_03189 | 3.24138E-05 | 5.71658E-05 | -8.1860E-01 | -4.4091E-01 |
| CCNA_03190 | 2.23195E-05 | 1.20471E-04 | -2.4322E+00 | -1.3611E+00 |
| CCNA_03191 | 1.52679E-04 | 9.44208E-05 | 6.9324E-01  | 4.2126E-01  |
| CCNA_03192 | 2.30809E-05 | 7.08925E-05 | -1.6189E+00 | -8.9730E-01 |
| CCNA_03193 | 2.80468E-05 | 5.50794E-05 | -9.7372E-01 | -5.2937E-01 |
| CCNA_03194 | 2.60334E-05 | 1.04725E-04 | -2.0081E+00 | -1.1193E+00 |
| CCNA_03195 | 2.54465E-05 | 1.10497E-04 | -2.1184E+00 | -1.1821E+00 |
| CCNA_03196 | 7.60716E-05 | 1.22827E-04 | -6.9123E-01 | -3.6827E-01 |
| CCNA_03197 | 1.05292E-04 | 1.16823E-04 | -1.4998E-01 | -5.9609E-02 |
| CCNA_03198 | 3.90750E-04 | 1.32704E-04 | 1.5580E+00  | 9.1439E-01  |
| CCNA_03199 | 1.56023E-04 | 3.87785E-05 | 2.0082E+00  | 1.1711E+00  |
| CCNA_03200 | 8.48567E-05 | 8.32834E-05 | 2.6922E-02  | 4.1276E-02  |
| CCNA_03201 | 1.36325E-04 | 1.47729E-04 | -1.1595E-01 | -4.0201E-02 |
| CCNA_03202 | 6.51677E-05 | 1.06654E-04 | -7.1074E-01 | -3.7940E-01 |
| CCNA_03203 | 8.22624E-05 | 1.00237E-04 | -2.8517E-01 | -1.3670E-01 |
| CCNA_03204 | 2.16333E-05 | 1.00095E-04 | -2.2099E+00 | -1.2344E+00 |
| CCNA_03205 | 2.58886E-04 | 7.53655E-05 | 1.7802E+00  | 1.0411E+00  |
| CCNA_03206 | 8.53714E-05 | 1.20283E-04 | -4.9465E-01 | -2.5617E-01 |
| CCNA_03207 | 2.64276E-05 | 4.47225E-05 | -7.5903E-01 | -4.0694E-01 |
| CCNA_03208 | 2.42517E-05 | 9.85036E-05 | -2.0220E+00 | -1.1272E+00 |
| CCNA_03209 | 2.52349E-04 | 6.87611E-05 | 1.8756E+00  | 1.0955E+00  |
| CCNA_03210 | 2.40587E-04 | 1.02871E-04 | 1.2256E+00  | 7.2487E-01  |
| CCNA_03211 | 1.17466E-04 | 8.35685E-05 | 4.9112E-01  | 3.0600E-01  |
| CCNA_03212 | 2.16011E-04 | 1.36096E-04 | 6.6642E-01  | 4.0596E-01  |
| CCNA_03213 | 1.98082E-04 | 1.47099E-04 | 4.2926E-01  | 2.7072E-01  |
| CCNA_03214 | 1.61943E-04 | 2.91195E-05 | 2.4751E+00  | 1.4374E+00  |
| CCNA_03215 | 1.43168E-04 | 1.09656E-04 | 3.8466E-01  | 2.4529E-01  |
| CCNA_03216 | 1.91145E-04 | 1.39293E-04 | 4.5649E-01  | 2.8625E-01  |
| CCNA_03217 | 1.76302E-04 | 9.57192E-05 | 8.8108E-01  | 5.2838E-01  |
| CCNA_03218 | 1.57840E-04 | 1.47099E-04 | 1.0164E-01  | 8.3884E-02  |
| CCNA_03219 | 6.56763E-05 | 7.06599E-05 | -1.0561E-01 | -3.4302E-02 |
| CCNA_03220 | 3.24890E-05 | 1.29544E-04 | -1.9954E+00 | -1.1120E+00 |
| CCNA_03221 | 2.35444E-05 | 1.12365E-04 | -2.2547E+00 | -1.2599E+00 |
| CCNA_03222 | 1.81454E-04 | 1.09731E-04 | 7.2556E-01  | 4.3969E-01  |
| CCNA_03223 | 3.32776E-05 | 5.30381E-05 | -6.7255E-01 | -3.5762E-01 |
| CCNA_03224 | 7.85546E-05 | 1.04718E-04 | -4.1479E-01 | -2.1062E-01 |
| CCNA_03225 | 6.97664E-05 | 1.01971E-04 | -5.4760E-01 | -2.8636E-01 |
| CCNA_03226 | 4.63484E-05 | 8.85894E-05 | -9.3464E-01 | -5.0708E-01 |
| CCNA_03227 | 1.38413E-04 | 1.01431E-04 | 4.4841E-01  | 2.8164E-01  |
| CCNA_03228 | 8.87994E-05 | 1.43113E-04 | -6.8857E-01 | -3.6675E-01 |
| CCNA_03229 | 1.18941E-04 | 9.14113E-05 | 3.7972E-01  | 2.4247E-01  |
| CCNA_03230 | 5.79115E-05 | 1.21949E-04 | -1.0744E+00 | -5.8677E-01 |
| CCNA_03231 | 5.22443E-05 | 1.47947E-04 | -1.5017E+00 | -8.3048E-01 |

|            |             |             |             |             |
|------------|-------------|-------------|-------------|-------------|
| CCNA_03232 | 5.59552E-05 | 1.19308E-04 | -1.0924E+00 | -5.9702E-01 |
| CCNA_03233 | 2.86879E-05 | 1.44472E-04 | -2.3322E+00 | -1.3041E+00 |
| CCNA_03234 | 2.60273E-05 | 7.50653E-05 | -1.5281E+00 | -8.4552E-01 |
| CCNA_03235 | 1.52101E-04 | 8.46568E-05 | 8.4523E-01  | 5.0794E-01  |
| CCNA_03236 | 1.36132E-04 | 7.16956E-05 | 9.2493E-01  | 5.5339E-01  |
| CCNA_03237 | 1.29797E-04 | 6.31023E-05 | 1.0404E+00  | 6.1921E-01  |
| CCNA_03238 | 1.87651E-05 | 4.29513E-05 | -1.1947E+00 | -6.5537E-01 |
| CCNA_03239 | 2.16814E-05 | 1.24253E-04 | -2.5186E+00 | -1.4104E+00 |
| CCNA_03240 | 7.48196E-05 | 1.03862E-04 | -4.7323E-01 | -2.4395E-01 |
| CCNA_03241 | 3.18381E-04 | 5.27754E-05 | 2.5926E+00  | 1.5044E+00  |
| CCNA_03242 | 6.06954E-05 | 1.45830E-04 | -1.2646E+00 | -6.9527E-01 |
| CCNA_03243 | 4.26646E-05 | 1.46251E-04 | -1.7773E+00 | -9.8763E-01 |
| CCNA_03244 | 1.20509E-04 | 1.22445E-04 | -2.3042E-02 | 1.2782E-02  |
| CCNA_03245 | 1.17773E-04 | 1.47339E-04 | -3.2316E-01 | -1.5837E-01 |
| CCNA_03246 | 5.44835E-05 | 1.02624E-04 | -9.1350E-01 | -4.9503E-01 |
| CCNA_03247 | 6.22333E-05 | 1.43609E-04 | -1.2064E+00 | -6.6206E-01 |
| CCNA_03248 | 6.16825E-05 | 4.45799E-05 | 4.6830E-01  | 2.9298E-01  |
| CCNA_03249 | 5.66023E-05 | 1.23293E-04 | -1.1232E+00 | -6.1459E-01 |
| CCNA_03250 | 9.51076E-05 | 1.14129E-04 | -2.6308E-01 | -1.2411E-01 |
| CCNA_04004 | 8.79175E-05 | 1.43204E-04 | -7.0387E-01 | -3.7548E-01 |
| CCNA_03252 | 6.91043E-05 | 1.47016E-04 | -1.0891E+00 | -5.9519E-01 |
| CCNA_03253 | 1.39662E-04 | 9.07359E-05 | 6.2211E-01  | 3.8070E-01  |
| CCNA_03254 | 9.18241E-05 | 1.25109E-04 | -4.4628E-01 | -2.2858E-01 |
| CCNA_03255 | 2.95667E-05 | 1.46378E-04 | -2.3076E+00 | -1.2900E+00 |
| CCNA_03256 | 2.71800E-05 | 1.15855E-04 | -2.0916E+00 | -1.1669E+00 |
| CCNA_03257 | 9.84422E-05 | 1.47399E-04 | -5.8241E-01 | -3.0621E-01 |
| CCNA_03258 | 2.49920E-05 | 1.43038E-04 | -2.5168E+00 | -1.4093E+00 |
| CCNA_03259 | 1.31633E-04 | 1.15668E-04 | 1.8647E-01  | 1.3226E-01  |
| CCNA_03260 | 3.12792E-05 | 1.02579E-04 | -1.7134E+00 | -9.5121E-01 |
| CCNA_03261 | 3.53903E-05 | 1.19840E-04 | -1.7597E+00 | -9.7757E-01 |
| CCNA_03262 | 5.74871E-05 | 1.40307E-04 | -1.2873E+00 | -7.0818E-01 |
| CCNA_03263 | 6.95106E-05 | 8.83493E-05 | -3.4605E-01 | -1.7142E-01 |
| CCNA_03264 | 2.21458E-04 | 1.24103E-04 | 8.3543E-01  | 5.0235E-01  |
| CCNA_03265 | 1.39268E-04 | 8.34184E-05 | 7.3933E-01  | 4.4754E-01  |
| CCNA_03266 | 2.41078E-04 | 1.47099E-04 | 7.1266E-01  | 4.3234E-01  |
| CCNA_03267 | 2.46724E-04 | 5.12068E-05 | 2.2683E+00  | 1.3195E+00  |
| CCNA_03268 | 2.19373E-05 | 1.43226E-04 | -2.7067E+00 | -1.5177E+00 |
| CCNA_03269 | 2.34481E-05 | 9.07734E-05 | -1.9527E+00 | -1.0877E+00 |
| CCNA_03271 | 1.79618E-04 | 9.87963E-05 | 8.6232E-01  | 5.1768E-01  |
| CCNA_03270 | 1.10111E-04 | 1.32449E-04 | -2.6652E-01 | -1.2607E-01 |
| CCNA_03272 | 6.04817E-05 | 1.09596E-04 | -8.5765E-01 | -4.6318E-01 |
| CCNA_03274 | 1.13623E-04 | 7.43899E-05 | 6.1097E-01  | 3.7434E-01  |
| CCNA_03275 | 7.87050E-05 | 1.15172E-04 | -5.4930E-01 | -2.8733E-01 |
| CCNA_03276 | 1.25354E-04 | 7.01345E-05 | 8.3770E-01  | 5.0364E-01  |
| CCNA_03277 | 1.30089E-04 | 5.89821E-05 | 1.1410E+00  | 6.7661E-01  |
| CCNA_03278 | 2.70446E-05 | 7.97110E-05 | -1.5594E+00 | -8.6338E-01 |
| CCNA_03279 | 5.48266E-05 | 5.80890E-05 | -8.3496E-02 | -2.1693E-02 |
| CCNA_03280 | 2.60126E-04 | 1.24606E-04 | 1.0618E+00  | 6.3142E-01  |
| CCNA_03281 | 1.09373E-04 | 5.85468E-05 | 9.0145E-01  | 5.4000E-01  |
| CCNA_03282 | 2.28251E-05 | 1.46971E-04 | -2.6867E+00 | -1.5063E+00 |
| CCNA_03283 | 8.47273E-05 | 1.41530E-04 | -7.4023E-01 | -3.9622E-01 |
| CCNA_03284 | 1.04913E-04 | 1.07314E-04 | -3.2711E-02 | 7.2680E-03  |
| CCNA_03285 | 2.83779E-05 | 1.06977E-04 | -1.9144E+00 | -1.0658E+00 |

|            |             |             |             |             |
|------------|-------------|-------------|-------------|-------------|
| CCNA_03286 | 1.34230E-04 | 9.61545E-05 | 4.8120E-01  | 3.0034E-01  |
| CCNA_03287 | 1.48775E-04 | 7.65513E-05 | 9.5852E-01  | 5.7255E-01  |
| CCNA_03288 | 1.38178E-04 | 8.07091E-05 | 7.7563E-01  | 4.6824E-01  |
| CCNA_03289 | 1.40827E-04 | 9.59519E-05 | 5.5346E-01  | 3.4155E-01  |
| CCNA_03290 | 1.29180E-04 | 7.78947E-05 | 7.2968E-01  | 4.4204E-01  |
| CCNA_03291 | 3.59378E-04 | 6.94441E-05 | 2.3714E+00  | 1.3783E+00  |
| CCNA_03292 | 6.03583E-05 | 1.15750E-04 | -9.3941E-01 | -5.0980E-01 |
| CCNA_03293 | 2.10946E-05 | 6.66672E-05 | -1.6601E+00 | -9.2077E-01 |
| CCNA_03294 | 1.02833E-04 | 9.14188E-05 | 1.6967E-01  | 1.2268E-01  |
| CCNA_03295 | 2.38523E-04 | 1.07795E-04 | 1.1458E+00  | 6.7932E-01  |
| CCNA_03296 | 1.23046E-04 | 7.87878E-05 | 6.4305E-01  | 3.9264E-01  |
| CCNA_03297 | 2.05086E-04 | 1.45838E-04 | 4.9181E-01  | 3.0639E-01  |
| CCNA_03298 | 3.91434E-05 | 1.36051E-04 | -1.7973E+00 | -9.9903E-01 |
| CCNA_03299 | 2.54194E-05 | 7.74444E-05 | -1.6072E+00 | -8.9063E-01 |
| CCNA_03300 | 2.99941E-05 | 1.05378E-04 | -1.8128E+00 | -1.0079E+00 |
| CCNA_03301 | 1.08723E-04 | 1.02166E-04 | 8.9678E-02  | 7.7064E-02  |
| CCNA_03302 | 3.54355E-05 | 0.00000E+00 | 1.2205E+01  | 6.9863E+00  |
| CCNA_03303 | 4.24178E-05 | 4.08949E-05 | 5.2587E-02  | 5.5911E-02  |
| CCNA_03304 | 1.76515E-05 | 1.17124E-04 | -2.7300E+00 | -1.5309E+00 |
| CCNA_03305 | 2.38153E-05 | 1.21867E-04 | -2.3553E+00 | -1.3172E+00 |
| CCNA_03306 | 2.55819E-05 | 5.41338E-05 | -1.0814E+00 | -5.9080E-01 |
| CCNA_03307 | 2.31471E-05 | 1.15563E-04 | -2.3197E+00 | -1.2969E+00 |
| CCNA_03308 | 2.49950E-05 | 9.95918E-05 | -1.9943E+00 | -1.1114E+00 |
| CCNA_03309 | 2.62943E-04 | 1.29942E-04 | 1.0168E+00  | 6.0579E-01  |
| CCNA_03310 | 3.85505E-05 | 1.47091E-04 | -1.9319E+00 | -1.0758E+00 |
| CCNA_03311 | 1.21806E-04 | 3.90787E-05 | 1.6399E+00  | 9.6111E-01  |
| CCNA_03312 | 1.57034E-04 | 8.62629E-05 | 8.6417E-01  | 5.1874E-01  |
| CCNA_03313 | 2.24218E-05 | 1.04357E-04 | -2.2185E+00 | -1.2392E+00 |
| CCNA_03314 | 1.95386E-05 | 2.88569E-05 | -5.6274E-01 | -2.9500E-01 |
| CCNA_03315 | 1.26360E-04 | 1.08493E-04 | 2.1987E-01  | 1.5131E-01  |
| CCNA_03316 | 2.42520E-04 | 4.69965E-05 | 2.3673E+00  | 1.3759E+00  |
| CCNA_03317 | 1.88163E-05 | 8.00337E-05 | -2.0885E+00 | -1.1651E+00 |
| CCNA_03318 | 1.21833E-04 | 3.96716E-05 | 1.6185E+00  | 9.4891E-01  |
| CCNA_03319 | 5.73670E-04 | 1.47099E-04 | 1.9634E+00  | 1.1456E+00  |
| CCNA_03320 | 6.69753E-04 | 1.37192E-04 | 2.2874E+00  | 1.3304E+00  |
| CCNA_03321 | 1.25701E-04 | 7.30765E-05 | 7.8240E-01  | 4.7211E-01  |
| CCNA_03322 | 2.19854E-05 | 7.60560E-05 | -1.7905E+00 | -9.9514E-01 |
| CCNA_03323 | 4.71941E-05 | 8.29606E-05 | -8.1386E-01 | -4.3820E-01 |
| CCNA_03324 | 2.33969E-05 | 1.33612E-04 | -2.5136E+00 | -1.4075E+00 |
| CCNA_03325 | 1.02081E-04 | 1.47099E-04 | -5.2710E-01 | -2.7467E-01 |
| CCNA_03326 | 6.21581E-05 | 1.21949E-04 | -9.7229E-01 | -5.2855E-01 |
| CCNA_03327 | 1.47099E-04 | 1.10159E-04 | 4.1713E-01  | 2.6380E-01  |
| CCNA_03328 | 2.62392E-04 | 1.45755E-04 | 8.4812E-01  | 5.0959E-01  |
| CCNA_03329 | 2.65269E-04 | 7.69341E-05 | 1.7856E+00  | 1.0442E+00  |
| CCNA_03330 | 1.75974E-05 | 8.06641E-05 | -2.1965E+00 | -1.2267E+00 |
| CCNA_03331 | 3.07465E-04 | 8.61203E-05 | 1.8359E+00  | 1.0729E+00  |
| CCNA_03332 | 2.94722E-04 | 1.05206E-04 | 1.4861E+00  | 8.7339E-01  |
| CCNA_03333 | 2.60093E-05 | 1.47376E-04 | -2.5023E+00 | -1.4011E+00 |
| CCNA_03334 | 1.46765E-04 | 9.88488E-05 | 5.7013E-01  | 3.5106E-01  |
| CCNA_03335 | 8.10285E-05 | 7.06449E-05 | 1.9774E-01  | 1.3869E-01  |
| CCNA_03336 | 4.15992E-05 | 1.38716E-04 | -1.7375E+00 | -9.6492E-01 |
| CCNA_03337 | 1.56029E-04 | 1.14152E-04 | 4.5079E-01  | 2.8300E-01  |
| CCNA_03338 | 1.02590E-04 | 1.47099E-04 | -5.1993E-01 | -2.7058E-01 |

|            |             |             |             |             |
|------------|-------------|-------------|-------------|-------------|
| CCNA_03339 | 2.47016E-04 | 7.02696E-05 | 1.8135E+00  | 1.0601E+00  |
| CCNA_03340 | 5.64397E-05 | 8.48294E-05 | -5.8790E-01 | -3.0935E-01 |
| CCNA_03341 | 7.20176E-05 | 1.07307E-04 | -5.7536E-01 | -3.0219E-01 |
| CCNA_03342 | 2.16859E-04 | 1.08538E-04 | 9.9848E-01  | 5.9533E-01  |
| CCNA_03343 | 2.17627E-05 | 1.18069E-04 | -2.4396E+00 | -1.3653E+00 |
| CCNA_03344 | 1.70887E-05 | 8.14821E-05 | -2.2533E+00 | -1.2591E+00 |
| CCNA_03345 | 3.24048E-05 | 1.13896E-04 | -1.8134E+00 | -1.0082E+00 |
| CCNA_03346 | 2.09736E-04 | 1.23720E-04 | 7.6142E-01  | 4.6014E-01  |
| CCNA_03347 | 1.79359E-04 | 8.27430E-05 | 1.1160E+00  | 6.6237E-01  |
| CCNA_03348 | 4.76275E-05 | 1.02887E-04 | -1.1112E+00 | -6.0777E-01 |
| CCNA_03349 | 2.41075E-04 | 1.47099E-04 | 7.1264E-01  | 4.3233E-01  |
| CCNA_03350 | 4.23312E-04 | 1.09701E-04 | 1.9481E+00  | 1.1369E+00  |
| CCNA_03351 | 2.49920E-05 | 1.07667E-04 | -2.1070E+00 | -1.1756E+00 |
| CCNA_03352 | 2.11186E-05 | 4.99535E-05 | -1.2421E+00 | -6.8241E-01 |
| CCNA_03353 | 3.48817E-05 | 1.16200E-04 | -1.7360E+00 | -9.6410E-01 |
| CCNA_03354 | 5.97774E-05 | 6.58792E-05 | -1.4031E-01 | -5.4095E-02 |
| CCNA_03355 | 5.52088E-05 | 5.87269E-05 | -8.9229E-02 | -2.4963E-02 |
| CCNA_03356 | 1.58319E-04 | 1.27826E-04 | 3.0860E-01  | 2.0191E-01  |
| CCNA_03357 | 6.09361E-05 | 1.47099E-04 | -1.2714E+00 | -6.9914E-01 |
| CCNA_03358 | 6.33649E-05 | 1.47099E-04 | -1.2150E+00 | -6.6698E-01 |
| CCNA_03359 | 6.15561E-05 | 9.87137E-05 | -6.8139E-01 | -3.6266E-01 |
| CCNA_03360 | 1.14186E-04 | 1.30002E-04 | -1.8720E-01 | -8.0833E-02 |
| CCNA_03361 | 3.18871E-05 | 1.47054E-04 | -2.2052E+00 | -1.2317E+00 |
| CCNA_03273 | 1.82414E-05 | 1.47099E-04 | -3.0113E+00 | -1.6914E+00 |
| CCNA_03362 | 1.42567E-04 | 8.98202E-05 | 6.6643E-01  | 4.0597E-01  |
| CCNA_03363 | 1.13611E-04 | 1.40141E-04 | -3.0282E-01 | -1.4677E-01 |
| CCNA_03364 | 1.21743E-04 | 7.85177E-05 | 6.3265E-01  | 3.8671E-01  |
| CCNA_03365 | 9.16284E-05 | 1.43144E-04 | -6.4362E-01 | -3.4112E-01 |
| CCNA_03366 | 2.39357E-05 | 7.51404E-05 | -1.6504E+00 | -9.1526E-01 |
| CCNA_03367 | 1.21075E-04 | 9.78806E-05 | 3.0673E-01  | 2.0084E-01  |
| CCNA_03368 | 1.87236E-04 | 1.01310E-04 | 8.8599E-01  | 5.3118E-01  |
| CCNA_03369 | 4.34682E-05 | 1.47099E-04 | -1.7587E+00 | -9.7704E-01 |
| CCNA_03370 | 3.34220E-05 | 1.40975E-04 | -2.0765E+00 | -1.1583E+00 |
| CCNA_03371 | 2.28561E-04 | 1.41162E-04 | 6.9517E-01  | 4.2236E-01  |
| CCNA_03372 | 9.43281E-05 | 1.09716E-04 | -2.1807E-01 | -9.8437E-02 |
| CCNA_03373 | 1.15194E-04 | 8.53247E-05 | 4.3294E-01  | 2.7282E-01  |
| CCNA_03374 | 4.41424E-05 | 1.47099E-04 | -1.7365E+00 | -9.6438E-01 |
| CCNA_03375 | 8.46762E-05 | 7.18382E-05 | 2.3711E-01  | 1.6114E-01  |
| CCNA_03376 | 4.34802E-05 | 6.53163E-05 | -5.8715E-01 | -3.0892E-01 |
| CCNA_03377 | 1.35593E-04 | 9.75429E-05 | 4.7510E-01  | 2.9686E-01  |
| CCNA_03378 | 1.54087E-04 | 1.42738E-04 | 1.1033E-01  | 8.8841E-02  |
| CCNA_03379 | 3.69072E-05 | 5.76086E-05 | -6.4245E-01 | -3.4045E-01 |
| CCNA_03380 | 4.33960E-05 | 1.01708E-04 | -1.2288E+00 | -6.7484E-01 |
| CCNA_03381 | 5.18440E-05 | 7.57183E-05 | -5.4652E-01 | -2.8575E-01 |
| CCNA_03382 | 9.06413E-05 | 2.73558E-05 | 1.7280E+00  | 1.0113E+00  |
| CCNA_03383 | 1.34994E-04 | 1.50318E-04 | -1.5516E-01 | -6.2563E-02 |
| CCNA_03384 | 1.29739E-04 | 1.48299E-04 | -1.9294E-01 | -8.4104E-02 |
| CCNA_03385 | 1.24834E-04 | 1.21169E-04 | 4.2936E-02  | 5.0408E-02  |
| CCNA_03386 | 1.23215E-04 | 8.66231E-05 | 5.0826E-01  | 3.1577E-01  |
| CCNA_03387 | 4.90752E-05 | 1.28261E-04 | -1.3860E+00 | -7.6449E-01 |
| CCNA_03388 | 6.45868E-05 | 4.74618E-05 | 4.4431E-01  | 2.7930E-01  |
| CCNA_03389 | 2.63232E-04 | 9.21768E-05 | 1.5138E+00  | 8.8918E-01  |
| CCNA_03390 | 2.28624E-04 | 1.32764E-04 | 7.8405E-01  | 4.7305E-01  |



|            |             |             |             |             |
|------------|-------------|-------------|-------------|-------------|
| CCNA_03391 | 5.78693E-05 | 1.34453E-04 | -1.2162E+00 | -6.6767E-01 |
| CCNA_03392 | 2.09441E-05 | 1.33875E-04 | -2.6761E+00 | -1.5002E+00 |
| CCNA_03393 | 2.44963E-04 | 1.03539E-04 | 1.2423E+00  | 7.3438E-01  |
| CCNA_03394 | 2.25271E-04 | 8.10243E-05 | 1.4751E+00  | 8.6715E-01  |
| CCNA_03395 | 3.25459E-04 | 8.61803E-05 | 1.9169E+00  | 1.1191E+00  |
| CCNA_03396 | 7.88766E-05 | 1.11750E-04 | -5.0265E-01 | -2.6073E-01 |
| CCNA_03397 | 1.06008E-04 | 1.11637E-04 | -7.4696E-02 | -1.6675E-02 |
| CCNA_03398 | 2.72478E-04 | 1.55782E-04 | 8.0656E-01  | 4.8588E-01  |
| CCNA_03399 | 1.22998E-04 | 1.32426E-04 | -1.0660E-01 | -3.4871E-02 |
| CCNA_03400 | 1.19350E-04 | 6.93465E-05 | 7.8319E-01  | 4.7256E-01  |
| CCNA_03401 | 6.78132E-05 | 1.47174E-04 | -1.1179E+00 | -6.1159E-01 |
| CCNA_03402 | 7.73206E-05 | 1.32059E-04 | -7.7228E-01 | -4.1449E-01 |
| CCNA_03403 | 1.30733E-04 | 5.33158E-05 | 1.2938E+00  | 7.6376E-01  |
| CCNA_03404 | 6.49329E-05 | 1.28801E-04 | -9.8814E-01 | -5.3759E-01 |
| CCNA_03405 | 3.97408E-04 | 1.45305E-04 | 1.4515E+00  | 8.5366E-01  |
| CCNA_03406 | 4.24112E-04 | 1.47099E-04 | 1.5276E+00  | 8.9708E-01  |
| CCNA_03407 | 1.52462E-04 | 1.01543E-04 | 5.8628E-01  | 3.6027E-01  |
| CCNA_03408 | 2.12631E-04 | 1.21086E-04 | 8.1225E-01  | 4.8913E-01  |
| CCNA_03409 | 2.24308E-05 | 1.04680E-04 | -2.2223E+00 | -1.2414E+00 |
| CCNA_03410 | 1.52417E-04 | 6.17514E-05 | 1.3033E+00  | 7.6918E-01  |
| CCNA_04013 | 1.11212E-04 | 1.21859E-04 | -1.3195E-01 | -4.9326E-02 |
| CCNA_03412 | 7.12321E-05 | 7.57183E-05 | -8.8196E-02 | -2.4374E-02 |
| CCNA_03413 | 2.07027E-04 | 1.13581E-04 | 8.6602E-01  | 5.1979E-01  |
| CCNA_03414 | 5.75924E-05 | 1.08380E-04 | -9.1217E-01 | -4.9427E-01 |
| CCNA_03415 | 9.18662E-05 | 8.98803E-05 | 3.1456E-02  | 4.3861E-02  |
| CCNA_03416 | 8.65903E-05 | 1.14744E-04 | -4.0619E-01 | -2.0572E-01 |
| CCNA_03417 | 6.70728E-05 | 1.47099E-04 | -1.1330E+00 | -6.2020E-01 |
| CCNA_03418 | 1.41646E-04 | 1.37725E-04 | 4.0449E-02  | 4.8989E-02  |
| CCNA_03419 | 1.49973E-04 | 1.15728E-04 | 3.7391E-01  | 2.3915E-01  |
| CCNA_03420 | 1.32048E-04 | 6.67573E-05 | 9.8393E-01  | 5.8704E-01  |
| CCNA_03421 | 1.92271E-04 | 5.12744E-05 | 1.9066E+00  | 1.1132E+00  |
| CCNA_03422 | 3.02649E-05 | 6.78980E-05 | -1.1657E+00 | -6.3887E-01 |
| CCNA_03423 | 1.21668E-04 | 1.03922E-04 | 2.2737E-01  | 1.5559E-01  |
| CCNA_03424 | 1.19865E-04 | 1.12883E-04 | 8.6518E-02  | 7.5262E-02  |
| CCNA_03425 | 3.64377E-05 | 8.81391E-05 | -1.2744E+00 | -7.0081E-01 |
| CCNA_03426 | 2.02937E-04 | 1.05018E-04 | 9.5031E-01  | 5.6786E-01  |
| CCNA_03427 | 2.26241E-04 | 6.73802E-05 | 1.7473E+00  | 1.0224E+00  |
| CCNA_03428 | 1.64016E-04 | 1.34550E-04 | 2.8564E-01  | 1.8882E-01  |
| CCNA_03429 | 1.46061E-04 | 6.91063E-05 | 1.0796E+00  | 6.4157E-01  |
| CCNA_03430 | 1.54518E-04 | 9.32951E-05 | 7.2781E-01  | 4.4098E-01  |
| CCNA_03431 | 1.53913E-04 | 9.63796E-05 | 6.7523E-01  | 4.1099E-01  |
| CCNA_03432 | 1.37170E-04 | 1.04035E-04 | 3.9883E-01  | 2.5337E-01  |
| CCNA_03433 | 1.30025E-04 | 6.87311E-05 | 9.1963E-01  | 5.5037E-01  |
| CCNA_03434 | 2.02488E-04 | 1.47099E-04 | 4.6100E-01  | 2.8882E-01  |
| CCNA_03435 | 2.05318E-05 | 1.12853E-04 | -2.4584E+00 | -1.3760E+00 |
| CCNA_03436 | 7.93220E-05 | 3.75477E-05 | 1.0788E+00  | 6.4112E-01  |
| CCNA_03437 | 1.45444E-04 | 1.42746E-04 | 2.6968E-02  | 4.1302E-02  |
| CCNA_03438 | 9.26186E-05 | 6.14437E-05 | 5.9191E-01  | 3.6347E-01  |
| CCNA_03439 | 4.67216E-05 | 1.47189E-04 | -1.6555E+00 | -9.1816E-01 |
| CCNA_03440 | 2.47693E-05 | 0.00000E+00 | 1.1689E+01  | 6.6917E+00  |
| CCNA_03441 | 0.00000E+00 | 0.00000E+00 | -1.3183E+00 | -7.2586E-01 |
| CCNA_03442 | 4.38516E-04 | 8.42815E-05 | 2.3792E+00  | 1.3827E+00  |
| CCNA_03443 | 2.90972E-05 | 7.87803E-05 | -1.4369E+00 | -7.9353E-01 |

|            |             |             |             |             |
|------------|-------------|-------------|-------------|-------------|
| CCNA_03444 | 2.91995E-05 | 8.01312E-05 | -1.4564E+00 | -8.0463E-01 |
| CCNA_03445 | 1.85063E-04 | 1.42543E-04 | 3.7656E-01  | 2.4067E-01  |
| CCNA_03446 | 4.65079E-05 | 9.77531E-05 | -1.0717E+00 | -5.8523E-01 |
| CCNA_03447 | 1.12690E-04 | 1.48652E-04 | -3.9962E-01 | -2.0197E-01 |
| CCNA_03448 | 1.67107E-04 | 1.47556E-04 | 1.7946E-01  | 1.2826E-01  |
| CCNA_03449 | 1.12747E-04 | 5.80890E-05 | 9.5661E-01  | 5.7145E-01  |
| CCNA_03450 | 9.96642E-05 | 1.11840E-04 | -1.6634E-01 | -6.8939E-02 |
| CCNA_03451 | 2.38902E-04 | 1.23270E-04 | 9.5453E-01  | 5.7027E-01  |
| CCNA_03452 | 1.14135E-04 | 6.15413E-07 | 7.5175E+00  | 4.3130E+00  |
| CCNA_03453 | 1.85451E-04 | 4.86101E-05 | 1.9315E+00  | 1.1274E+00  |
| CCNA_03454 | 1.78159E-04 | 3.88160E-05 | 2.1982E+00  | 1.2795E+00  |
| CCNA_03455 | 1.23407E-04 | 1.23638E-04 | -2.7472E-03 | 2.4356E-02  |
| CCNA_03456 | 1.67125E-05 | 6.41230E-05 | -1.9398E+00 | -1.0803E+00 |
| CCNA_03457 | 1.25475E-04 | 6.37327E-05 | 9.7716E-01  | 5.8317E-01  |
| CCNA_03458 | 6.49660E-05 | 1.37680E-04 | -1.0836E+00 | -5.9201E-01 |
| CCNA_03459 | 6.87552E-05 | 1.43579E-04 | -1.0623E+00 | -5.7989E-01 |
| CCNA_03460 | 1.08476E-04 | 1.41365E-04 | -3.8208E-01 | -1.9197E-01 |
| CCNA_03461 | 5.67016E-05 | 1.17792E-04 | -1.0548E+00 | -5.7560E-01 |
| CCNA_03462 | 4.83017E-05 | 1.41275E-04 | -1.5483E+00 | -8.5706E-01 |
| CCNA_03463 | 5.10976E-05 | 1.06121E-04 | -1.0544E+00 | -5.7538E-01 |
| CCNA_03464 | 1.49636E-04 | 1.39391E-04 | 1.0227E-01  | 8.4247E-02  |
| CCNA_03465 | 3.58129E-04 | 9.24845E-05 | 1.9531E+00  | 1.1397E+00  |
| CCNA_03466 | 3.16370E-04 | 7.54481E-05 | 2.0679E+00  | 1.2052E+00  |
| CCNA_03467 | 4.61257E-05 | 9.54940E-05 | -1.0499E+00 | -5.7279E-01 |
| CCNA_03468 | 4.56682E-05 | 9.57492E-05 | -1.0681E+00 | -5.8318E-01 |
| CCNA_03469 | 5.46851E-05 | 7.17256E-05 | -3.9141E-01 | -1.9729E-01 |
| CCNA_04011 | 2.06305E-04 | 1.27413E-04 | 6.9520E-01  | 4.2238E-01  |
| CCNA_03471 | 2.36329E-04 | 8.77714E-05 | 1.4289E+00  | 8.4077E-01  |
| CCNA_03472 | 1.88012E-04 | 1.43354E-04 | 3.9119E-01  | 2.4901E-01  |
| CCNA_03473 | 1.87585E-04 | 1.44757E-04 | 3.7386E-01  | 2.3912E-01  |
| CCNA_03474 | 9.35967E-05 | 9.79632E-05 | -6.5846E-02 | -1.1628E-02 |
| CCNA_03475 | 1.44192E-04 | 8.75912E-05 | 7.1904E-01  | 4.3597E-01  |
| CCNA_03476 | 1.21054E-04 | 1.37725E-04 | -1.8619E-01 | -8.0255E-02 |
| CCNA_03477 | 4.04977E-05 | 1.10114E-04 | -1.4431E+00 | -7.9703E-01 |
| CCNA_03478 | 5.61749E-05 | 5.95900E-05 | -8.5248E-02 | -2.2693E-02 |
| CCNA_03479 | 3.49449E-05 | 2.14119E-05 | 7.0629E-01  | 4.2870E-01  |
| CCNA_03480 | 3.36658E-05 | 8.24578E-05 | -1.2924E+00 | -7.1109E-01 |
| CCNA_03481 | 1.43226E-04 | 1.01431E-04 | 4.9772E-01  | 3.0976E-01  |
| CCNA_03482 | 8.42909E-05 | 1.31893E-04 | -6.4595E-01 | -3.4245E-01 |
| CCNA_03483 | 3.64828E-05 | 1.23578E-04 | -1.7601E+00 | -9.7782E-01 |
| CCNA_03484 | 1.41901E-04 | 1.32809E-04 | 9.5484E-02  | 8.0375E-02  |
| CCNA_03485 | 2.04466E-04 | 8.66831E-05 | 1.2379E+00  | 7.3189E-01  |
| CCNA_03486 | 4.88735E-05 | 9.25371E-05 | -9.2101E-01 | -4.9931E-01 |
| CCNA_03487 | 1.12967E-04 | 9.13363E-05 | 3.0656E-01  | 2.0075E-01  |
| CCNA_03488 | 8.66174E-05 | 8.71184E-05 | -8.3956E-03 | 2.1135E-02  |
| CCNA_03489 | 7.53373E-05 | 1.34460E-04 | -8.3577E-01 | -4.5070E-01 |
| CCNA_03490 | 1.07158E-04 | 5.29255E-05 | 1.0175E+00  | 6.0620E-01  |
| CCNA_03491 | 3.28382E-05 | 1.47099E-04 | -2.1633E+00 | -1.2077E+00 |
| CCNA_03492 | 2.28751E-04 | 1.12831E-04 | 1.0195E+00  | 6.0734E-01  |
| CCNA_03493 | 2.61658E-05 | 1.40862E-04 | -2.4284E+00 | -1.3590E+00 |
| CCNA_03494 | 3.43346E-04 | 1.47099E-04 | 1.2228E+00  | 7.2327E-01  |
| CCNA_03495 | 4.48827E-05 | 1.21064E-04 | -1.4315E+00 | -7.9045E-01 |
| CCNA_03496 | 4.74530E-05 | 6.41530E-05 | -4.3510E-01 | -2.2220E-01 |

|            |             |             |             |             |
|------------|-------------|-------------|-------------|-------------|
| CCNA_03497 | 3.51887E-05 | 6.74778E-05 | -9.3934E-01 | -5.0976E-01 |
| CCNA_03498 | 8.16455E-05 | 1.08778E-04 | -4.1399E-01 | -2.1017E-01 |
| CCNA_03499 | 1.60263E-04 | 1.46228E-04 | 1.3218E-01  | 1.0130E-01  |
| CCNA_03500 | 7.10545E-05 | 7.79248E-05 | -1.3323E-01 | -5.0057E-02 |
| CCNA_03501 | 3.05388E-05 | 1.25484E-04 | -2.0387E+00 | -1.1367E+00 |
| CCNA_03502 | 1.51890E-04 | 1.46363E-04 | 5.3433E-02  | 5.6394E-02  |
| CCNA_03503 | 1.67875E-04 | 1.16741E-04 | 5.2401E-01  | 3.2475E-01  |
| CCNA_03504 | 1.89126E-04 | 9.92391E-05 | 9.3028E-01  | 5.5644E-01  |
| CCNA_03505 | 2.06615E-04 | 9.37754E-05 | 1.1396E+00  | 6.7579E-01  |
| CCNA_03506 | 1.99389E-04 | 9.81208E-05 | 1.0229E+00  | 6.0924E-01  |
| CCNA_03507 | 1.50969E-04 | 1.33807E-04 | 1.7405E-01  | 1.2518E-01  |
| CCNA_03508 | 1.26959E-04 | 1.47594E-04 | -2.1732E-01 | -9.8008E-02 |
| CCNA_03509 | 3.25793E-05 | 1.39564E-04 | -2.0988E+00 | -1.1710E+00 |
| CCNA_03510 | 8.44595E-05 | 1.41380E-04 | -7.4327E-01 | -3.9795E-01 |
| CCNA_03511 | 2.65269E-05 | 1.40742E-04 | -2.4074E+00 | -1.3470E+00 |
| CCNA_03512 | 2.00683E-05 | 1.07825E-04 | -2.4256E+00 | -1.3573E+00 |
| CCNA_03513 | 8.46551E-05 | 1.46949E-04 | -7.9566E-01 | -4.2783E-01 |
| CCNA_03514 | 3.61458E-04 | 1.12823E-04 | 1.6797E+00  | 9.8381E-01  |
| CCNA_03515 | 2.87992E-04 | 7.79923E-05 | 1.8845E+00  | 1.1006E+00  |
| CCNA_03516 | 1.63562E-04 | 4.08499E-05 | 2.0012E+00  | 1.1672E+00  |
| CCNA_03517 | 7.82235E-05 | 1.46896E-04 | -9.0914E-01 | -4.9254E-01 |
| CCNA_03518 | 2.32139E-04 | 1.20643E-04 | 9.4417E-01  | 5.6436E-01  |
| CCNA_03519 | 1.68784E-04 | 8.36511E-05 | 1.0126E+00  | 6.0339E-01  |
| CCNA_03520 | 5.26958E-05 | 1.47099E-04 | -1.4810E+00 | -8.1867E-01 |
| CCNA_03521 | 2.61718E-05 | 1.47384E-04 | -2.4934E+00 | -1.3960E+00 |
| CCNA_03522 | 5.12782E-05 | 1.47099E-04 | -1.5204E+00 | -8.4110E-01 |
| CCNA_03523 | 3.22904E-05 | 1.32854E-04 | -2.0406E+00 | -1.1378E+00 |
| CCNA_03524 | 4.54666E-05 | 1.47061E-04 | -1.6935E+00 | -9.3985E-01 |
| CCNA_03525 | 1.16705E-04 | 9.17791E-05 | 3.4655E-01  | 2.2355E-01  |
| CCNA_03526 | 4.56953E-05 | 1.07074E-04 | -1.2285E+00 | -6.7466E-01 |
| CCNA_03527 | 2.26385E-05 | 1.13041E-04 | -2.3199E+00 | -1.2971E+00 |
| CCNA_03528 | 3.21760E-05 | 1.45500E-04 | -2.1769E+00 | -1.2155E+00 |
| CCNA_03529 | 2.43690E-05 | 1.40157E-04 | -2.5238E+00 | -1.4134E+00 |
| CCNA_03530 | 7.62672E-05 | 9.24245E-05 | -2.7727E-01 | -1.3220E-01 |
| CCNA_03531 | 1.55547E-04 | 7.38946E-05 | 1.0737E+00  | 6.3823E-01  |
| CCNA_03532 | 1.31792E-04 | 8.75162E-05 | 5.9055E-01  | 3.6270E-01  |
| CCNA_03533 | 3.10384E-05 | 1.33229E-04 | -2.1017E+00 | -1.1726E+00 |
| CCNA_03534 | 4.87983E-05 | 1.46281E-04 | -1.5838E+00 | -8.7730E-01 |
| CCNA_03535 | 9.79276E-05 | 1.47264E-04 | -5.8864E-01 | -3.0977E-01 |
| CCNA_03536 | 2.65390E-05 | 7.72943E-05 | -1.5422E+00 | -8.5357E-01 |
| CCNA_03537 | 1.60299E-04 | 1.39789E-04 | 1.9747E-01  | 1.3854E-01  |
| CCNA_03538 | 1.44749E-04 | 1.05941E-04 | 4.5021E-01  | 2.8267E-01  |
| CCNA_03539 | 7.44554E-05 | 1.36862E-04 | -8.7829E-01 | -4.7495E-01 |
| CCNA_03540 | 2.15021E-04 | 1.16756E-04 | 8.8091E-01  | 5.2828E-01  |
| CCNA_03541 | 7.30469E-05 | 1.47099E-04 | -1.0099E+00 | -5.5000E-01 |
| CCNA_03542 | 1.67914E-04 | 1.28914E-04 | 3.8125E-01  | 2.4334E-01  |
| CCNA_03543 | 2.04836E-05 | 1.42866E-04 | -2.8020E+00 | -1.5720E+00 |
| CCNA_03544 | 8.47695E-05 | 1.46776E-04 | -7.9202E-01 | -4.2575E-01 |
| CCNA_03545 | 1.40625E-04 | 1.45853E-04 | -5.2700E-02 | -4.1313E-03 |
| CCNA_03546 | 1.37959E-04 | 1.23540E-04 | 1.5920E-01  | 1.1671E-01  |
| CCNA_03547 | 9.52550E-05 | 1.43796E-04 | -5.9419E-01 | -3.1293E-01 |
| CCNA_03548 | 1.16094E-04 | 1.06969E-04 | 1.1803E-01  | 9.3233E-02  |
| CCNA_03549 | 1.45131E-04 | 8.73436E-05 | 7.3249E-01  | 4.4364E-01  |

|            |             |             |             |             |
|------------|-------------|-------------|-------------|-------------|
| CCNA_03550 | 9.24470E-05 | 6.35376E-05 | 5.4089E-01  | 3.3438E-01  |
| CCNA_03551 | 1.64299E-04 | 1.17176E-04 | 4.8758E-01  | 3.0398E-01  |
| CCNA_03552 | 9.41415E-05 | 6.63670E-05 | 5.0425E-01  | 3.1348E-01  |
| CCNA_03553 | 5.17628E-05 | 5.10267E-05 | 2.0533E-02  | 3.7632E-02  |
| CCNA_03554 | 3.43174E-04 | 1.06189E-04 | 1.6922E+00  | 9.9096E-01  |
| CCNA_03555 | 8.83931E-05 | 6.70049E-05 | 3.9955E-01  | 2.5378E-01  |
| CCNA_03556 | 4.91986E-05 | 1.47099E-04 | -1.5801E+00 | -8.7516E-01 |
| CCNA_03557 | 3.32866E-05 | 8.56249E-05 | -1.3631E+00 | -7.5141E-01 |
| CCNA_03558 | 1.85803E-04 | 1.06594E-04 | 8.0157E-01  | 4.8304E-01  |
| CCNA_03559 | 1.80759E-04 | 1.47099E-04 | 2.9723E-01  | 1.9543E-01  |
| CCNA_03560 | 2.56903E-05 | 1.32216E-04 | -2.3635E+00 | -1.3219E+00 |
| CCNA_03561 | 8.17839E-05 | 1.27676E-04 | -6.4263E-01 | -3.4055E-01 |
| CCNA_03562 | 1.04636E-04 | 1.47099E-04 | -4.9144E-01 | -2.5433E-01 |
| CCNA_03563 | 4.66163E-05 | 1.38971E-04 | -1.5759E+00 | -8.7275E-01 |
| CCNA_03564 | 1.11814E-04 | 1.06301E-04 | 7.2880E-02  | 6.7484E-02  |
| CCNA_03565 | 4.21298E-04 | 1.28816E-04 | 1.7095E+00  | 1.0008E+00  |
| CCNA_03566 | 3.87602E-04 | 8.44091E-05 | 2.1990E+00  | 1.2800E+00  |
| CCNA_03567 | 4.39828E-05 | 1.13656E-04 | -1.3697E+00 | -7.5516E-01 |
| CCNA_03568 | 3.62240E-05 | 1.40809E-04 | -1.9587E+00 | -1.0911E+00 |
| CCNA_03569 | 6.81954E-05 | 9.22143E-05 | -4.3537E-01 | -2.2236E-01 |
| CCNA_03570 | 1.82384E-05 | 6.45508E-05 | -1.8234E+00 | -1.0139E+00 |
| CCNA_03571 | 1.93038E-05 | 3.69623E-05 | -9.3724E-01 | -5.0856E-01 |
| CCNA_03572 | 1.03501E-04 | 1.47414E-04 | -5.1025E-01 | -2.6506E-01 |
| CCNA_03573 | 3.36899E-05 | 1.21206E-04 | -1.8470E+00 | -1.0274E+00 |
| CCNA_03574 | 1.87558E-04 | 9.49612E-05 | 9.8183E-01  | 5.8584E-01  |
| CCNA_03575 | 1.90757E-04 | 9.43007E-05 | 1.0163E+00  | 6.0550E-01  |
| CCNA_03576 | 1.69262E-05 | 5.88620E-05 | -1.7980E+00 | -9.9944E-01 |
| CCNA_03577 | 1.20578E-04 | 3.75102E-05 | 1.6844E+00  | 9.8648E-01  |
| CCNA_03578 | 1.29752E-04 | 1.21514E-04 | 9.4573E-02  | 7.9855E-02  |
| CCNA_03579 | 2.45316E-05 | 7.94258E-05 | -1.6949E+00 | -9.4066E-01 |
| CCNA_03580 | 6.14779E-05 | 6.81532E-05 | -1.4880E-01 | -5.8936E-02 |
| CCNA_03581 | 6.57455E-05 | 1.25019E-04 | -9.2720E-01 | -5.0284E-01 |
| CCNA_03582 | 1.11420E-04 | 7.16956E-05 | 6.3594E-01  | 3.8858E-01  |
| CCNA_03583 | 7.15752E-05 | 1.47099E-04 | -1.0393E+00 | -5.6675E-01 |
| CCNA_03584 | 1.08756E-04 | 8.04540E-05 | 4.3477E-01  | 2.7386E-01  |
| CCNA_03585 | 5.97022E-05 | 1.11180E-04 | -8.9706E-01 | -4.8565E-01 |
| CCNA_03586 | 1.28045E-04 | 1.24876E-04 | 3.6099E-02  | 4.6509E-02  |
| CCNA_03587 | 4.04044E-05 | 1.47099E-04 | -1.8642E+00 | -1.0372E+00 |
| CCNA_03588 | 5.21059E-05 | 1.42903E-04 | -1.4555E+00 | -8.0412E-01 |
| CCNA_03589 | 1.47656E-04 | 1.40119E-04 | 7.5538E-02  | 6.9000E-02  |
| CCNA_03590 | 3.75154E-04 | 9.48186E-05 | 1.9841E+00  | 1.1574E+00  |
| CCNA_03591 | 3.74844E-04 | 9.35202E-05 | 2.0028E+00  | 1.1681E+00  |
| CCNA_03592 | 1.97884E-05 | 9.06908E-05 | -2.1962E+00 | -1.2265E+00 |
| CCNA_03593 | 1.27579E-04 | 1.13919E-04 | 1.6332E-01  | 1.1906E-01  |
| CCNA_03594 | 1.39518E-04 | 1.42926E-04 | -3.4863E-02 | 6.0411E-03  |
| CCNA_03595 | 3.01566E-05 | 1.24066E-04 | -2.0405E+00 | -1.1377E+00 |
| CCNA_03596 | 5.01496E-05 | 1.32907E-04 | -1.4061E+00 | -7.7594E-01 |
| CCNA_03597 | 3.25014E-04 | 7.18157E-05 | 2.1780E+00  | 1.2680E+00  |
| CCNA_03598 | 3.11555E-04 | 7.49978E-05 | 2.0544E+00  | 1.1975E+00  |
| CCNA_03599 | 1.55210E-04 | 1.23240E-04 | 3.3269E-01  | 2.1565E-01  |
| CCNA_03600 | 3.09902E-05 | 8.91373E-05 | -1.5242E+00 | -8.4329E-01 |
| CCNA_03601 | 1.02150E-04 | 1.47399E-04 | -5.2907E-01 | -2.7579E-01 |
| CCNA_03602 | 1.60895E-05 | 7.80749E-05 | -2.2786E+00 | -1.2735E+00 |

|            |             |             |             |             |
|------------|-------------|-------------|-------------|-------------|
| CCNA_03603 | 1.74980E-05 | 1.03772E-04 | -2.5680E+00 | -1.4386E+00 |
| CCNA_03604 | 3.94293E-05 | 1.05408E-04 | -1.4186E+00 | -7.8310E-01 |
| CCNA_03605 | 8.19735E-05 | 5.96725E-05 | 4.5796E-01  | 2.8709E-01  |
| CCNA_03606 | 3.99018E-05 | 1.41680E-04 | -1.8281E+00 | -1.0166E+00 |
| CCNA_03607 | 1.05331E-04 | 4.46925E-05 | 1.2366E+00  | 7.3114E-01  |
| CCNA_03608 | 9.28654E-05 | 8.08292E-05 | 2.0018E-01  | 1.4008E-01  |
| CCNA_03609 | 1.86486E-04 | 9.93741E-05 | 9.0804E-01  | 5.4376E-01  |
| CCNA_03610 | 4.28813E-05 | 1.23000E-04 | -1.5202E+00 | -8.4103E-01 |
| CCNA_03611 | 5.03543E-05 | 1.47099E-04 | -1.5466E+00 | -8.5606E-01 |
| CCNA_03612 | 2.60153E-05 | 1.52675E-04 | -2.5529E+00 | -1.4300E+00 |
| CCNA_03613 | 2.64246E-05 | 1.35428E-04 | -2.3575E+00 | -1.3185E+00 |
| CCNA_03614 | 2.73847E-05 | 1.20681E-04 | -2.1397E+00 | -1.1943E+00 |
| CCNA_03615 | 5.17598E-05 | 4.03471E-05 | 3.5918E-01  | 2.3076E-01  |
| CCNA_03616 | 3.08819E-05 | 6.70425E-05 | -1.1183E+00 | -6.1184E-01 |
| CCNA_03617 | 2.04234E-05 | 1.05116E-04 | -2.3636E+00 | -1.3220E+00 |
| CCNA_03618 | 3.46470E-05 | 5.92522E-05 | -7.7420E-01 | -4.1559E-01 |
| CCNA_03619 | 5.35354E-05 | 1.38708E-04 | -1.3735E+00 | -7.5734E-01 |
| CCNA_03620 | 2.13504E-05 | 9.83159E-05 | -2.2031E+00 | -1.2304E+00 |
| CCNA_03621 | 3.28863E-05 | 9.29348E-05 | -1.4987E+00 | -8.2876E-01 |
| CCNA_03622 | 2.62982E-05 | 1.44750E-04 | -2.4604E+00 | -1.3772E+00 |
| CCNA_03623 | 4.85725E-05 | 1.19210E-04 | -1.2953E+00 | -7.1275E-01 |
| CCNA_03624 | 2.14888E-05 | 1.30407E-04 | -2.6012E+00 | -1.4575E+00 |
| CCNA_03625 | 1.97372E-05 | 1.15547E-04 | -2.5494E+00 | -1.4279E+00 |
| CCNA_03626 | 2.47783E-05 | 1.15015E-04 | -2.2146E+00 | -1.2370E+00 |
| CCNA_03627 | 1.35064E-04 | 5.42239E-05 | 1.3165E+00  | 7.7668E-01  |
| CCNA_03628 | 1.22652E-04 | 1.39939E-04 | -1.9027E-01 | -8.2585E-02 |
| CCNA_03629 | 5.20020E-04 | 1.01198E-04 | 2.3613E+00  | 1.3725E+00  |
| CCNA_03630 | 4.13645E-04 | 4.84825E-05 | 3.0926E+00  | 1.7896E+00  |
| CCNA_03631 | 4.15490E-04 | 4.72217E-05 | 3.1371E+00  | 1.8149E+00  |
| CCNA_03632 | 1.81463E-04 | 1.14347E-04 | 6.6619E-01  | 4.0584E-01  |
| CCNA_03633 | 5.35174E-05 | 1.46573E-04 | -1.4535E+00 | -8.0300E-01 |
| CCNA_03634 | 4.08619E-05 | 3.50485E-06 | 3.5404E+00  | 2.0449E+00  |
| CCNA_03635 | 2.57896E-05 | 8.27655E-05 | -1.6822E+00 | -9.3340E-01 |
| CCNA_03636 | 2.45316E-05 | 6.89337E-05 | -1.4906E+00 | -8.2411E-01 |
| CCNA_03637 | 2.66774E-05 | 1.47099E-04 | -2.4630E+00 | -1.3787E+00 |
| CCNA_03638 | 1.69617E-04 | 7.06824E-05 | 1.2627E+00  | 7.4603E-01  |
| CCNA_03639 | 1.47842E-04 | 1.00703E-04 | 5.5388E-01  | 3.4179E-01  |
| CCNA_03640 | 9.87853E-05 | 1.25417E-04 | -3.4440E-01 | -1.7048E-01 |
| CCNA_03641 | 1.34561E-04 | 1.47099E-04 | -1.2857E-01 | -4.7396E-02 |
| CCNA_03642 | 3.23867E-05 | 8.62103E-05 | -1.4125E+00 | -7.7957E-01 |
| CCNA_03643 | 2.75773E-05 | 9.54715E-05 | -1.7915E+00 | -9.9576E-01 |
| CCNA_03644 | 2.95035E-05 | 9.94342E-05 | -1.7528E+00 | -9.7367E-01 |
| CCNA_03645 | 2.50014E-04 | 1.47099E-04 | 7.6517E-01  | 4.6228E-01  |
| CCNA_03646 | 6.67417E-05 | 1.14880E-04 | -7.8349E-01 | -4.2088E-01 |
| CCNA_03647 | 4.82806E-05 | 1.43714E-04 | -1.5737E+00 | -8.7151E-01 |
| CCNA_03648 | 2.88775E-05 | 8.81466E-05 | -1.6099E+00 | -8.9219E-01 |
| CCNA_03649 | 1.72970E-04 | 1.06361E-04 | 7.0147E-01  | 4.2596E-01  |
| CCNA_03650 | 4.95657E-05 | 5.90271E-05 | -2.5213E-01 | -1.1786E-01 |
| CCNA_03651 | 1.12855E-04 | 1.41237E-04 | -3.2368E-01 | -1.5867E-01 |
| CCNA_03652 | 3.92096E-05 | 1.47069E-04 | -1.9072E+00 | -1.0617E+00 |
| CCNA_03653 | 6.02770E-05 | 9.80983E-05 | -7.0266E-01 | -3.7479E-01 |
| CCNA_03654 | 2.06010E-05 | 1.46198E-04 | -2.8270E+00 | -1.5863E+00 |
| CCNA_03655 | 2.12390E-05 | 9.18541E-05 | -2.1125E+00 | -1.1788E+00 |

|            |             |             |             |             |
|------------|-------------|-------------|-------------|-------------|
| CCNA_03656 | 2.36612E-04 | 1.21792E-04 | 9.5804E-01  | 5.7227E-01  |
| CCNA_03657 | 1.51162E-04 | 1.08215E-04 | 4.8212E-01  | 3.0087E-01  |
| CCNA_03658 | 3.78823E-05 | 1.11555E-04 | -1.5581E+00 | -8.6265E-01 |
| CCNA_03659 | 1.44053E-04 | 1.36314E-04 | 7.9621E-02  | 7.1328E-02  |
| CCNA_03660 | 1.95142E-04 | 6.98944E-05 | 1.4811E+00  | 8.7058E-01  |
| CCNA_03661 | 7.01456E-05 | 1.43316E-04 | -1.0308E+00 | -5.6191E-01 |
| CCNA_03662 | 3.06411E-05 | 1.01025E-04 | -1.7211E+00 | -9.5561E-01 |
| CCNA_03663 | 1.40929E-04 | 1.41763E-04 | -8.5507E-03 | 2.1046E-02  |
| CCNA_03664 | 1.40186E-04 | 1.43579E-04 | -3.4546E-02 | 6.2218E-03  |
| CCNA_03665 | 9.51497E-05 | 6.97518E-05 | 4.4786E-01  | 2.8133E-01  |
| CCNA_03666 | 5.62862E-05 | 8.84693E-05 | -6.5244E-01 | -3.4615E-01 |
| CCNA_03667 | 3.38283E-05 | 1.34280E-04 | -1.9889E+00 | -1.1083E+00 |
| CCNA_03668 | 3.48305E-05 | 8.94150E-05 | -1.3602E+00 | -7.4975E-01 |
| CCNA_03669 | 2.88203E-05 | 1.40884E-04 | -2.2893E+00 | -1.2796E+00 |
| CCNA_03670 | 2.59641E-05 | 9.83084E-05 | -1.9207E+00 | -1.0694E+00 |
| CCNA_03671 | 5.55760E-05 | 1.16621E-04 | -1.0693E+00 | -5.8388E-01 |
| CCNA_03672 | 3.45356E-05 | 1.47099E-04 | -2.0906E+00 | -1.1663E+00 |
| CCNA_03673 | 5.30479E-05 | 1.38198E-04 | -1.3814E+00 | -7.6184E-01 |
| CCNA_03674 | 2.71063E-04 | 9.76255E-05 | 1.4732E+00  | 8.6606E-01  |
| CCNA_03675 | 2.65736E-04 | 9.41056E-05 | 1.4975E+00  | 8.7994E-01  |
| CCNA_03676 | 1.48631E-04 | 1.41470E-04 | 7.1192E-02  | 6.6522E-02  |
| CCNA_03677 | 2.36588E-05 | 5.83591E-05 | -1.3026E+00 | -7.1691E-01 |
| CCNA_03678 | 2.92356E-05 | 1.47099E-04 | -2.3309E+00 | -1.3033E+00 |
| CCNA_03679 | 2.81792E-05 | 1.47099E-04 | -2.3840E+00 | -1.3336E+00 |
| CCNA_03680 | 9.93421E-05 | 1.48074E-04 | -5.7587E-01 | -3.0249E-01 |
| CCNA_03681 | 3.49645E-04 | 1.30843E-04 | 1.4180E+00  | 8.3457E-01  |
| CCNA_03682 | 2.77997E-04 | 1.47091E-04 | 9.1830E-01  | 5.4961E-01  |
| CCNA_03683 | 2.89106E-05 | 1.14542E-04 | -1.9861E+00 | -1.1067E+00 |
| CCNA_03684 | 4.88615E-05 | 1.07104E-04 | -1.1323E+00 | -6.1978E-01 |
| CCNA_03685 | 2.25392E-05 | 2.85942E-05 | -3.4347E-01 | -1.6995E-01 |
| CCNA_03686 | 6.61699E-05 | 7.82700E-05 | -2.4236E-01 | -1.1229E-01 |
| CCNA_03687 | 7.33389E-05 | 1.31999E-04 | -8.4789E-01 | -4.5761E-01 |
| CCNA_03688 | 2.02163E-04 | 8.38913E-05 | 1.2688E+00  | 7.4950E-01  |
| CCNA_03689 | 2.36747E-04 | 1.24231E-04 | 9.3026E-01  | 5.5643E-01  |
| CCNA_03690 | 2.40046E-04 | 1.27886E-04 | 9.0839E-01  | 5.4396E-01  |
| CCNA_03691 | 1.33887E-04 | 1.18902E-04 | 1.7118E-01  | 1.2354E-01  |
| CCNA_03692 | 1.43828E-04 | 7.70917E-05 | 8.9958E-01  | 5.3893E-01  |
| CCNA_03693 | 2.93079E-05 | 1.46618E-04 | -2.3226E+00 | -1.2986E+00 |
| CCNA_03694 | 2.91574E-05 | 1.46100E-04 | -2.3250E+00 | -1.2999E+00 |
| CCNA_03695 | 1.08350E-04 | 1.47324E-04 | -4.4333E-01 | -2.2690E-01 |
| CCNA_03696 | 2.43720E-05 | 7.74595E-05 | -1.6682E+00 | -9.2540E-01 |
| CCNA_03697 | 2.53261E-05 | 1.24989E-04 | -2.3030E+00 | -1.2874E+00 |
| CCNA_03698 | 2.03692E-05 | 1.46070E-04 | -2.8421E+00 | -1.5948E+00 |
| CCNA_03699 | 1.31789E-04 | 1.37320E-04 | -5.9353E-02 | -7.9253E-03 |
| CCNA_03700 | 1.71477E-04 | 1.20996E-04 | 5.0299E-01  | 3.1277E-01  |
| CCNA_03701 | 1.68985E-04 | 1.48412E-04 | 1.8724E-01  | 1.3270E-01  |
| CCNA_03702 | 2.28416E-04 | 8.35160E-05 | 1.4514E+00  | 8.5364E-01  |
| CCNA_03703 | 5.93651E-05 | 1.04260E-04 | -8.1253E-01 | -4.3744E-01 |
| CCNA_03704 | 4.44012E-05 | 6.83784E-05 | -6.2300E-01 | -3.2936E-01 |
| CCNA_03705 | 2.96991E-05 | 1.20328E-04 | -2.0184E+00 | -1.1251E+00 |
| CCNA_03706 | 9.22003E-05 | 1.37230E-04 | -5.7378E-01 | -3.0129E-01 |
| CCNA_03707 | 2.69453E-05 | 0.00000E+00 | 1.1810E+01  | 6.7609E+00  |
| CCNA_03708 | 0.00000E+00 | 0.00000E+00 | -1.3183E+00 | -7.2586E-01 |

|            |             |             |             |             |
|------------|-------------|-------------|-------------|-------------|
| CCNA_03709 | 2.82659E-04 | 0.00000E+00 | 1.5201E+01  | 8.6946E+00  |
| CCNA_03710 | 2.73967E-05 | 8.44767E-05 | -1.6245E+00 | -9.0050E-01 |
| CCNA_03711 | 3.07149E-04 | 8.02438E-05 | 1.9364E+00  | 1.1302E+00  |
| CCNA_03712 | 1.66165E-04 | 1.47309E-04 | 1.7373E-01  | 1.2499E-01  |
| CCNA_03713 | 2.88955E-05 | 1.37425E-04 | -2.2497E+00 | -1.2570E+00 |
| CCNA_03714 | 2.30716E-04 | 1.47099E-04 | 6.4928E-01  | 3.9619E-01  |
| CCNA_03715 | 1.18336E-04 | 1.26580E-04 | -9.7209E-02 | -2.9513E-02 |
| CCNA_03716 | 1.25198E-04 | 1.09791E-04 | 1.8939E-01  | 1.3392E-01  |
| CCNA_03717 | 3.28469E-04 | 1.17296E-04 | 1.4855E+00  | 8.7308E-01  |
| CCNA_03718 | 1.12660E-04 | 1.15623E-04 | -3.7505E-02 | 4.5340E-03  |
| CCNA_03719 | 1.28454E-04 | 1.47099E-04 | -1.9557E-01 | -8.5606E-02 |
| CCNA_03720 | 1.34714E-04 | 6.27871E-05 | 1.1012E+00  | 6.5393E-01  |
| CCNA_03721 | 1.22766E-04 | 1.47076E-04 | -2.6069E-01 | -1.2274E-01 |
| CCNA_03722 | 3.70908E-05 | 1.43271E-04 | -1.9496E+00 | -1.0859E+00 |
| CCNA_03723 | 6.36930E-05 | 1.35353E-04 | -1.0875E+00 | -5.9427E-01 |
| CCNA_03724 | 1.07423E-04 | 1.47406E-04 | -4.5653E-01 | -2.3443E-01 |
| CCNA_03725 | 7.53704E-05 | 1.12576E-04 | -5.7886E-01 | -3.0419E-01 |
| CCNA_03726 | 1.57416E-04 | 6.59017E-05 | 1.2561E+00  | 7.4222E-01  |
| CCNA_03727 | 1.13641E-04 | 5.71583E-05 | 9.9130E-01  | 5.9124E-01  |
| CCNA_03728 | 6.03553E-05 | 1.03329E-04 | -7.7573E-01 | -4.1646E-01 |
| CCNA_03729 | 3.53783E-05 | 1.39894E-04 | -1.9834E+00 | -1.1051E+00 |
| CCNA_03730 | 2.41283E-05 | 1.06744E-04 | -2.1453E+00 | -1.1975E+00 |
| CCNA_03731 | 9.73227E-05 | 1.47099E-04 | -5.9597E-01 | -3.1394E-01 |
| CCNA_03732 | 1.21246E-04 | 1.27360E-04 | -7.1026E-02 | -1.4582E-02 |
| CCNA_03733 | 3.81682E-05 | 1.47099E-04 | -1.9463E+00 | -1.0840E+00 |
| CCNA_03734 | 9.04065E-05 | 1.29950E-04 | -5.2349E-01 | -2.7261E-01 |
| CCNA_03735 | 7.15060E-05 | 1.46716E-04 | -1.0369E+00 | -5.6540E-01 |
| CCNA_03736 | 3.91253E-04 | 1.13694E-04 | 1.7829E+00  | 1.0426E+00  |
| CCNA_03737 | 1.01584E-04 | 1.33132E-04 | -3.9022E-01 | -1.9661E-01 |
| CCNA_03738 | 1.00411E-04 | 7.44724E-05 | 4.3103E-01  | 2.7173E-01  |
| CCNA_03739 | 1.98696E-05 | 1.47339E-04 | -2.8904E+00 | -1.6224E+00 |
| CCNA_03740 | 1.16608E-04 | 1.47099E-04 | -3.3515E-01 | -1.6521E-01 |
| CCNA_03741 | 2.77729E-04 | 1.47429E-04 | 9.1360E-01  | 5.4693E-01  |
| CCNA_03742 | 2.74235E-04 | 8.14972E-05 | 1.7505E+00  | 1.0242E+00  |
| CCNA_03743 | 1.39548E-04 | 9.51338E-05 | 5.5265E-01  | 3.4108E-01  |
| CCNA_03744 | 2.68550E-05 | 9.48186E-05 | -1.8199E+00 | -1.0119E+00 |
| CCNA_03745 | 1.52637E-04 | 8.79140E-05 | 7.9584E-01  | 4.7977E-01  |
| CCNA_03746 | 1.58788E-04 | 9.01730E-05 | 8.1625E-01  | 4.9141E-01  |
| CCNA_03747 | 2.19198E-04 | 1.24546E-04 | 8.1549E-01  | 4.9098E-01  |
| CCNA_03748 | 1.54006E-04 | 1.45117E-04 | 8.5722E-02  | 7.4808E-02  |
| CCNA_03749 | 5.74510E-05 | 7.41047E-05 | -3.6730E-01 | -1.8354E-01 |
| CCNA_03750 | 6.07706E-05 | 8.74862E-05 | -5.2573E-01 | -2.7389E-01 |
| CCNA_03751 | 3.52519E-05 | 1.19698E-04 | -1.7636E+00 | -9.7981E-01 |
| CCNA_03752 | 4.44072E-05 | 1.47099E-04 | -1.7279E+00 | -9.5946E-01 |
| CCNA_03753 | 5.54526E-05 | 1.38918E-04 | -1.3249E+00 | -7.2964E-01 |
| CCNA_03754 | 1.92466E-04 | 1.37139E-04 | 4.8891E-01  | 3.0473E-01  |
| CCNA_03755 | 2.32224E-05 | 7.58083E-05 | -1.7068E+00 | -9.4743E-01 |
| CCNA_03756 | 1.19898E-04 | 1.14347E-04 | 6.8334E-02  | 6.4892E-02  |
| CCNA_03757 | 4.04255E-05 | 1.33867E-04 | -1.7274E+00 | -9.5920E-01 |
| CCNA_03758 | 5.03211E-05 | 1.44975E-04 | -1.5266E+00 | -8.4464E-01 |
| CCNA_03759 | 3.19894E-05 | 1.47099E-04 | -2.2011E+00 | -1.2293E+00 |
| CCNA_03760 | 2.58558E-05 | 1.15908E-04 | -2.1643E+00 | -1.2084E+00 |
| CCNA_03761 | 2.34282E-04 | 1.46558E-04 | 6.7672E-01  | 4.1184E-01  |

|            |             |             |             |             |
|------------|-------------|-------------|-------------|-------------|
| CCNA_03762 | 6.67628E-05 | 1.23495E-04 | -8.8736E-01 | -4.8012E-01 |
| CCNA_03763 | 3.15591E-05 | 6.20891E-05 | -9.7632E-01 | -5.3085E-01 |
| CCNA_03764 | 3.08668E-05 | 7.38570E-05 | -1.2587E+00 | -6.9188E-01 |
| CCNA_03765 | 3.14823E-04 | 1.50896E-04 | 1.0609E+00  | 6.3095E-01  |
| CCNA_03766 | 1.54187E-04 | 1.38228E-04 | 1.5758E-01  | 1.1579E-01  |
| CCNA_03767 | 1.16040E-04 | 1.47556E-04 | -3.4669E-01 | -1.7178E-01 |
| CCNA_03768 | 1.53792E-04 | 1.13514E-04 | 4.3805E-01  | 2.7573E-01  |
| CCNA_03769 | 1.17599E-04 | 1.47099E-04 | -3.2295E-01 | -1.5825E-01 |
| CCNA_03770 | 1.56462E-04 | 9.86912E-05 | 6.6474E-01  | 4.0501E-01  |
| CCNA_03771 | 1.72693E-04 | 1.21972E-04 | 5.0160E-01  | 3.1197E-01  |
| CCNA_03772 | 2.47753E-05 | 1.06699E-04 | -2.1065E+00 | -1.1754E+00 |
| CCNA_03773 | 8.47394E-05 | 1.32029E-04 | -6.3978E-01 | -3.3893E-01 |
| CCNA_03774 | 2.92146E-05 | 1.28509E-04 | -2.1370E+00 | -1.1928E+00 |
| CCNA_03775 | 3.38614E-05 | 1.46941E-04 | -2.1175E+00 | -1.1816E+00 |
| CCNA_03776 | 2.90280E-05 | 1.09926E-04 | -1.9210E+00 | -1.0696E+00 |
| CCNA_03777 | 5.08779E-05 | 1.13566E-04 | -1.1584E+00 | -6.3470E-01 |
| CCNA_03778 | 5.17838E-05 | 1.13251E-04 | -1.1290E+00 | -6.1790E-01 |
| CCNA_03779 | 3.92141E-04 | 1.47834E-04 | 1.4073E+00  | 8.2849E-01  |
| CCNA_03780 | 3.26576E-05 | 1.14542E-04 | -1.8103E+00 | -1.0065E+00 |
| CCNA_03781 | 1.45426E-04 | 1.41245E-04 | 4.2038E-02  | 4.9896E-02  |
| CCNA_03782 | 1.44216E-04 | 1.45673E-04 | -1.4545E-02 | 1.7628E-02  |
| CCNA_03783 | 2.02236E-04 | 1.07532E-04 | 9.1119E-01  | 5.4555E-01  |
| CCNA_03784 | 1.24882E-04 | 1.11180E-04 | 1.6761E-01  | 1.2151E-01  |
| CCNA_04010 | 1.05217E-04 | 1.16230E-04 | -1.4367E-01 | -5.6011E-02 |
| CCNA_03786 | 1.60173E-05 | 1.46311E-04 | -3.1911E+00 | -1.7939E+00 |
| CCNA_03787 | 9.15803E-05 | 9.43458E-05 | -4.2988E-02 | 1.4071E-03  |
| CCNA_03788 | 1.54978E-04 | 9.83760E-05 | 6.5561E-01  | 3.9980E-01  |
| CCNA_03789 | 2.74948E-04 | 1.35541E-04 | 1.0204E+00  | 6.0782E-01  |
| CCNA_03790 | 2.81091E-04 | 1.13424E-04 | 1.3092E+00  | 7.7255E-01  |
| CCNA_03791 | 4.51536E-05 | 1.09551E-04 | -1.2787E+00 | -7.0329E-01 |
| CCNA_03792 | 3.01265E-05 | 1.39556E-04 | -2.2117E+00 | -1.2353E+00 |
| CCNA_03793 | 2.62892E-05 | 1.33214E-04 | -2.3411E+00 | -1.3092E+00 |
| CCNA_03794 | 2.69724E-05 | 1.47099E-04 | -2.4471E+00 | -1.3696E+00 |
| CCNA_03795 | 4.10605E-05 | 6.27496E-05 | -6.1192E-01 | -3.2304E-01 |
| CCNA_03796 | 7.37662E-05 | 1.25462E-04 | -7.6624E-01 | -4.1105E-01 |
| CCNA_03797 | 6.90772E-05 | 1.34318E-04 | -9.5938E-01 | -5.2119E-01 |
| CCNA_03798 | 2.03542E-05 | 1.20756E-04 | -2.5686E+00 | -1.4389E+00 |
| CCNA_03799 | 4.40701E-05 | 7.95158E-05 | -8.5148E-01 | -4.5966E-01 |
| CCNA_03800 | 4.69744E-05 | 1.47099E-04 | -1.6468E+00 | -9.1322E-01 |
| CCNA_03801 | 5.24279E-05 | 9.20793E-05 | -8.1258E-01 | -4.3747E-01 |
| CCNA_03802 | 1.67700E-04 | 1.43654E-04 | 2.2324E-01  | 1.5323E-01  |
| CCNA_03803 | 1.56059E-04 | 1.37852E-04 | 1.7891E-01  | 1.2795E-01  |
| CCNA_03804 | 1.42991E-04 | 9.59143E-05 | 5.7602E-01  | 3.5442E-01  |
| CCNA_03805 | 9.32807E-05 | 4.37994E-05 | 1.0905E+00  | 6.4779E-01  |
| CCNA_03806 | 9.59021E-05 | 5.84417E-05 | 7.1442E-01  | 4.3334E-01  |
| CCNA_03807 | 1.33294E-04 | 1.47091E-04 | -1.4214E-01 | -5.5138E-02 |
| CCNA_03808 | 1.76789E-04 | 1.15180E-04 | 6.1807E-01  | 3.7840E-01  |
| CCNA_03809 | 1.71546E-04 | 7.06374E-05 | 1.2800E+00  | 7.5586E-01  |
| CCNA_03810 | 5.65661E-05 | 1.47099E-04 | -1.3788E+00 | -7.6036E-01 |
| CCNA_03811 | 5.82846E-05 | 9.41657E-05 | -6.9213E-01 | -3.6878E-01 |
| CCNA_03812 | 6.85776E-05 | 1.06977E-04 | -6.4153E-01 | -3.3993E-01 |
| CCNA_03813 | 2.98469E-04 | 1.47099E-04 | 1.0207E+00  | 6.0803E-01  |
| CCNA_03814 | 2.24218E-05 | 1.37597E-04 | -2.6174E+00 | -1.4667E+00 |



|            |             |             |             |             |
|------------|-------------|-------------|-------------|-------------|
| CCNA_03815 | 1.89758E-05 | 7.61085E-05 | -2.0038E+00 | -1.1168E+00 |
| CCNA_03816 | 2.41966E-04 | 1.10872E-04 | 1.1258E+00  | 6.6796E-01  |
| CCNA_03817 | 2.53965E-04 | 1.19600E-04 | 1.0863E+00  | 6.4544E-01  |
| CCNA_03818 | 4.85816E-05 | 0.00000E+00 | 1.2660E+01  | 7.2458E+00  |
| CCNA_03819 | 1.89186E-05 | 1.34933E-04 | -2.8342E+00 | -1.5904E+00 |
| CCNA_03820 | 1.44210E-04 | 1.27518E-04 | 1.7741E-01  | 1.2710E-01  |
| CCNA_03821 | 8.24671E-05 | 6.74027E-05 | 2.9090E-01  | 1.9182E-01  |
| CCNA_03822 | 2.10735E-05 | 5.56573E-05 | -1.4011E+00 | -7.7311E-01 |
| CCNA_03823 | 2.03301E-05 | 8.77864E-05 | -2.1103E+00 | -1.1775E+00 |
| CCNA_03824 | 1.28033E-04 | 7.25286E-05 | 8.1978E-01  | 4.9342E-01  |
| CCNA_03825 | 5.45437E-05 | 1.28088E-04 | -1.2317E+00 | -6.7647E-01 |
| CCNA_03826 | 2.10250E-04 | 6.61269E-05 | 1.6687E+00  | 9.7752E-01  |
| CCNA_03827 | 1.99151E-04 | 6.84234E-05 | 1.5412E+00  | 9.0481E-01  |
| CCNA_03828 | 9.85777E-05 | 1.47099E-04 | -5.7748E-01 | -3.0340E-01 |
| CCNA_03829 | 1.64669E-04 | 1.31563E-04 | 3.2376E-01  | 2.1056E-01  |
| CCNA_03830 | 2.76315E-04 | 1.24373E-04 | 1.1516E+00  | 6.8263E-01  |
| CCNA_03831 | 3.37350E-05 | 1.49605E-04 | -2.1488E+00 | -1.1995E+00 |
| CCNA_03832 | 1.19383E-04 | 9.50362E-05 | 3.2897E-01  | 2.1353E-01  |
| CCNA_03833 | 2.39718E-05 | 1.47346E-04 | -2.6197E+00 | -1.4680E+00 |
| CCNA_03834 | 3.89628E-05 | 8.20525E-05 | -1.0745E+00 | -5.8682E-01 |
| CCNA_03835 | 1.29258E-04 | 1.28141E-04 | 1.2470E-02  | 3.3034E-02  |
| CCNA_03836 | 4.59843E-05 | 1.45838E-04 | -1.6651E+00 | -9.2367E-01 |
| CCNA_03837 | 1.29300E-04 | 1.43234E-04 | -1.4769E-01 | -5.8301E-02 |
| CCNA_03838 | 5.16845E-05 | 1.12741E-04 | -1.1252E+00 | -6.1576E-01 |
| CCNA_03839 | 7.46029E-05 | 1.31496E-04 | -8.1774E-01 | -4.4041E-01 |
| CCNA_03840 | 3.53572E-05 | 1.45875E-04 | -2.0446E+00 | -1.1401E+00 |
| CCNA_03841 | 8.30931E-05 | 1.15645E-04 | -4.7694E-01 | -2.4607E-01 |
| CCNA_03842 | 5.45888E-05 | 1.08230E-04 | -9.8744E-01 | -5.3720E-01 |
| CCNA_03843 | 6.07887E-05 | 1.47391E-04 | -1.2778E+00 | -7.0277E-01 |
| CCNA_03844 | 4.82505E-05 | 1.41462E-04 | -1.5518E+00 | -8.5903E-01 |
| CCNA_03845 | 7.09552E-05 | 1.47069E-04 | -1.0515E+00 | -5.7374E-01 |
| CCNA_03846 | 4.19363E-04 | 1.47099E-04 | 1.5114E+00  | 8.8781E-01  |
| CCNA_03847 | 2.87986E-04 | 1.04643E-04 | 1.4604E+00  | 8.5878E-01  |
| CCNA_03848 | 4.25593E-05 | 1.47099E-04 | -1.7892E+00 | -9.9442E-01 |
| CCNA_03849 | 7.31011E-05 | 9.73703E-05 | -4.1364E-01 | -2.0997E-01 |
| CCNA_03850 | 2.33488E-05 | 1.07089E-04 | -2.1973E+00 | -1.2272E+00 |
| CCNA_03851 | 3.29917E-05 | 1.47099E-04 | -2.1566E+00 | -1.2039E+00 |
| CCNA_03852 | 2.00204E-04 | 1.23045E-04 | 7.0222E-01  | 4.2638E-01  |
| CCNA_03853 | 3.29706E-05 | 1.47099E-04 | -2.1575E+00 | -1.2044E+00 |
| CCNA_03854 | 4.67457E-05 | 7.34743E-05 | -6.5246E-01 | -3.4616E-01 |
| CCNA_03855 | 1.05163E-04 | 1.25402E-04 | -2.5398E-01 | -1.1891E-01 |
| CCNA_03856 | 2.04264E-05 | 9.49462E-05 | -2.2166E+00 | -1.2381E+00 |
| CCNA_03857 | 2.07214E-04 | 3.29021E-05 | 2.6546E+00  | 1.5398E+00  |
| CCNA_03858 | 2.01733E-04 | 8.49270E-05 | 1.2480E+00  | 7.3766E-01  |
| CCNA_03859 | 1.55355E-04 | 1.46881E-04 | 8.0870E-02  | 7.2041E-02  |
| CCNA_03860 | 1.95386E-04 | 8.36286E-05 | 1.2241E+00  | 7.2403E-01  |
| CCNA_03861 | 3.05237E-05 | 9.59669E-05 | -1.6526E+00 | -9.1650E-01 |
| CCNA_03862 | 2.57324E-05 | 1.38911E-04 | -2.4324E+00 | -1.3612E+00 |
| CCNA_03863 | 3.89559E-04 | 7.92006E-05 | 2.2981E+00  | 1.3365E+00  |
| CCNA_03864 | 3.12051E-04 | 1.08553E-04 | 1.5233E+00  | 8.9463E-01  |
| CCNA_03865 | 4.52439E-05 | 1.39804E-04 | -1.6276E+00 | -9.0226E-01 |
| CCNA_03866 | 2.95065E-05 | 7.98160E-05 | -1.4356E+00 | -7.9279E-01 |
| CCNA_03867 | 3.20087E-04 | 1.28404E-04 | 1.3177E+00  | 7.7738E-01  |

|            |             |             |             |             |
|------------|-------------|-------------|-------------|-------------|
| CCNA_03868 | 1.92433E-04 | 1.20688E-04 | 6.7300E-01  | 4.0972E-01  |
| CCNA_03869 | 1.44180E-04 | 1.32089E-04 | 1.2631E-01  | 9.7954E-02  |
| CCNA_03870 | 1.33423E-04 | 8.26379E-05 | 6.9104E-01  | 4.2000E-01  |
| CCNA_03871 | 1.91572E-04 | 8.08217E-05 | 1.2450E+00  | 7.3590E-01  |
| CCNA_03872 | 1.13310E-04 | 9.59293E-05 | 2.4015E-01  | 1.6288E-01  |
| CCNA_03873 | 1.49161E-04 | 8.14221E-05 | 8.7327E-01  | 5.2393E-01  |
| CCNA_03874 | 1.25586E-04 | 7.42548E-05 | 7.5801E-01  | 4.5820E-01  |
| CCNA_03875 | 5.85977E-05 | 1.47099E-04 | -1.3279E+00 | -7.3133E-01 |
| CCNA_03876 | 1.20199E-04 | 9.15389E-05 | 3.9289E-01  | 2.4998E-01  |
| CCNA_03877 | 1.60007E-04 | 1.02564E-04 | 6.4154E-01  | 3.9178E-01  |
| CCNA_03878 | 3.23957E-05 | 9.22068E-05 | -1.5091E+00 | -8.3466E-01 |
| CCNA_03879 | 1.65608E-04 | 4.64562E-06 | 5.1535E+00  | 2.9648E+00  |
